# Supplementary material for: Bottom-up proteomics analysis of the secretome of murine islets of Langerhans in elevated glucose levels
Source: Royal Society of Chemistry journal article supplement (doi:10.1039/c6an02268e), 2016-12-05
Supplement: c6an02268e1.xlsx [file c6an02268e1.xlsx]

## Sheet: peptides
Sequence	N-term cleavage window	C-term cleavage window	Amino acid before	First amino acid	Second amino acid	Second last amino acid	Last amino acid	Amino acid after	A Count	R Count	N Count	D Count	C Count	Q Count	E Count	G Count	H Count	I Count	L Count	K Count	M Count	F Count	P Count	S Count	T Count	W Count	Y Count	V Count	U Count	O Count	Length	Missed cleavages	Mass	Proteins	Leading razor protein	Start position	End position	Gene names	Protein names	Unique (Groups)	Unique (Proteins)	Charges	PEP	Score	Identification type 1GT-1	Identification type 1GT-2	Identification type 1GT-3	Identification type 2GT-1	Identification type 2GT-2
AALQALR	KPSLLIQKAALQALRK	KAALQALRKMELEDEV	K	A	A	L	R	K	3	1	0	0	0	1	0	0	0	0	2	0	0	0	0	0	0	0	0	0	0	0	7	0	741.45	E9Q1Y3;E9Q414	E9Q1Y3	513	519	Apob	Apolipoprotein B-100;Apolipoprotein B-48	yes	no	2	0.0024966	132.94		By MS/MS		By MS/MS	By MS/MS
AIADHIR	SSAMSAAKAIADHIRD	KAIADHIRDIWFGTPE	K	A	I	I	R	D	2	1	0	1	0	0	0	0	1	2	0	0	0	0	0	0	0	0	0	0	0	0	7	0	794.44	P14152	P14152	249	255	Mdh1	Malate dehydrogenase, cytoplasmic	yes	yes	2	0.0034924	122.79			By matching		By MS/MS
AIETLIK	QEFSDVERAIETLIKN	RAIETLIKNFHKYSVA	R	A	I	I	K	N	1	0	0	0	0	0	1	0	0	2	1	1	0	0	0	0	1	0	0	0	0	0	7	0	786.485	Q9D2Q8	Q9D2Q8	21	27	S100a14	Protein S100-A14	yes	yes	2	0.036613	76.035			By MS/MS
ALADFIR	PESEKETKALADFIRQ	KALADFIRQNLSSIKA	K	A	L	I	R	Q	2	1	0	1	0	0	0	0	0	1	1	0	0	1	0	0	0	0	0	0	0	0	7	0	804.449	B2RS76	B2RS76	283	289	Cpb1		yes	yes	2	0.0029438	128.38	By MS/MS		By MS/MS
ALEYIEK	FPSPEMIRALEYIEKL	RALEYIEKLRQQAHRE	R	A	L	E	K	L	1	0	0	0	0	0	2	0	0	1	1	1	0	0	0	0	0	0	1	0	0	0	7	0	864.459	Q03517;Q4W8U9	Q03517	58	64	Scg2	Secretogranin-2;Secretoneurin;Manserin	yes	no	2	0.017188	89.142	By MS/MS		By MS/MS
ALLFIPR	VEGQLEFRALLFIPRR	RALLFIPRRAPFDLFE	R	A	L	P	R	R	1	1	0	0	0	0	0	0	0	1	2	0	0	1	1	0	0	0	0	0	0	0	7	0	828.522	Q71LX8;P11499;E9Q3D6	Q71LX8	331	337	Hsp90ab1	Heat shock protein HSP 90-beta	yes	no	2	0.030746	92.692			By matching
ALLFVPR	VEGQLEFRALLFVPRR	RALLFVPRRAPFDLFE	R	A	L	P	R	R	1	1	0	0	0	0	0	0	0	0	2	0	0	1	1	0	0	0	0	1	0	0	7	0	814.507	Q80Y52;Q3UIF3;Q3TKA2;P07901;Q3TJU7;A0PJ91;Q3TKB9;Q8C5U3;Q3TKG0	Q80Y52	340	346	Hsp90aa1	Heat shock protein HSP 90-alpha	yes	no	2	0.014461	92.692			By matching
ALPELTK	DDAELATRALPELTKL	RALPELTKLLNDEDPV	R	A	L	T	K	L	1	0	0	0	0	0	1	0	0	0	2	1	0	0	1	0	1	0	0	0	0	0	7	0	770.454	Q02257	Q02257	143	149	Jup	Junction plakoglobin	yes	yes	2	0.03075	79.451			By MS/MS
ALVILAK	________________	RALVILAKGAEEMETV	R	A	L	A	K	G	2	0	0	0	0	0	0	0	0	1	2	1	0	0	0	0	0	0	0	1	0	0	7	0	726.5	A2A813;Q99LX0;A2A815;D3K2X3;A2A817;A2A816	A2A813	6	12	Park7;Dj1	Protein deglycase DJ-1	yes	no	2	0.024167	88.734			By MS/MS
AQILPIR	________________	MAQILPIRFQEHLQLQ	M	A	Q	I	R	F	1	1	0	0	0	1	0	0	0	2	1	0	0	0	1	0	0	0	0	0	0	0	7	0	809.512	Q5SXR6;Q68FD5;Q3TAN1;Q3TYQ2;Q3U0H2	Q5SXR6	2	8	Cltc	Clathrin heavy chain;Clathrin heavy chain 1	yes	no	2	0.022421	70.912
ATIGLIR	PNQWPLVKATIGLIRN	KATIGLIRNLALCPAN	K	A	T	I	R	N	1	1	0	0	0	0	0	1	0	2	1	0	0	0	0	0	1	0	0	0	0	0	7	0	742.47	Q02257	Q02257	500	506	Jup	Junction plakoglobin	yes	yes	2	0.0055402	110.61	By MS/MS		By MS/MS
CAPSRMK	SEANSLGKCAPSRMKW	KCAPSRMKWSQEDQWP	K	C	A	M	K	W	1	1	0	0	1	0	0	0	0	0	0	1	1	0	1	1	0	0	0	0	0	0	7	1	848.4	B9EIU2	B9EIU2	1315	1321	C4a		yes	yes	2	0.040465	71.852		By matching		By MS/MS	By matching
CDVDIRK	TTFNSIMKCDVDIRKD	KCDVDIRKDLYANTVL	K	C	D	R	K	D	0	1	0	2	1	0	0	0	0	1	0	1	0	0	0	0	0	0	0	1	0	0	7	1	904.444	Q3UAF7;Q3UAF6;Q3U5R4;B2RRX1;P60710;Q3UAA9;Q3UA89;Q3U939;Q3U804;Q3UGS0;Q61276;Q3TIJ9;Q3UCF8;E9Q1F2;Q99NC5;O89054;F8WGM8;Q4KL81;P63260;Q3TSB7;B1ATY1;Q8BFZ3;Q3UBP6;Q3UBQ4;Q9QZ83	Q3UAF7	285	291	Actb;Actg1;Actbl2	Actin, cytoplasmic 1;Actin, cytoplasmic 1, N-terminally processed;Actin, cytoplasmic 2;Actin, cytoplasmic 2, N-terminally processed;Beta-actin-like protein 2	no	no	2	0.01224	205.38		By MS/MS		By MS/MS
DFNLFDK	RDKMVEEKDFNLFDKI	KDFNLFDKIQTEFLK_	K	D	F	D	K	I	0	0	1	2	0	0	0	0	0	0	1	1	0	2	0	0	0	0	0	0	0	0	7	0	897.423	Q80U29;B1AR52;F7DC70;B1AR51	Q80U29	1458	1464	mKIAA0357;Dnahc9;Dnah9		yes	no	1	0.019799	83.377			By MS/MS
DGVVLFK	FSKYQLDKDGVVLFKK	KDGVVLFKKFDEGRNN	K	D	G	F	K	K	0	0	0	1	0	0	0	1	0	0	1	1	0	1	0	0	0	0	0	2	0	0	7	0	776.443	Q3UDR2;Q3URP6;Q3U738;Q3TWE3;Q3TIM0;Q3THC3;Q3TF72;P09103;Q3TGS0;Q3UBY9;Q3UJA8;Q3UA23;Q3TT76	Q3UDR2	203	209	P4hb	Protein disulfide-isomerase	yes	no	2	0.018043	88.029	By matching		By MS/MS
DPKRNPR	ILKALFLRDPKRNPRP	RDPKRNPRPATYQFHP	R	D	P	P	R	P	0	2	1	1	0	0	0	0	0	0	0	1	0	0	2	0	0	0	0	0	0	0	7	2	881.483	Q3UN43;Q4KMV6;Q571D8;Q3U325;Q80XQ2	Q3UN43	413	419	Tbc1d5	TBC1 domain family member 5	yes	no	2	0.0078515	113.89	By matching	By matching	By matching		By MS/MS
DTLMISR	FLFPPKPKDTLMISRT	KDTLMISRTPEVTCVV	K	D	T	S	R	T	0	1	0	1	0	0	0	0	0	1	1	0	1	0	0	1	1	0	0	0	0	0	7	0	834.427	A0A097PUG1;A0A097PUH2	A0A097PUG1	268	274			yes	no	2	0.0024262	133.81			By matching
EAVSLLR	TRRQNGIREAVSLLRR	REAVSLLRRSGSTEIQ	R	E	A	L	R	R	1	1	0	0	0	0	1	0	0	0	2	0	0	0	0	1	0	0	0	1	0	0	7	0	786.46	P97350	P97350	334	340	Pkp1	Plakophilin-1	yes	yes	2	0.003337	124.37			By MS/MS
EIAQDFK	LPFQRLVREIAQDFKT	REIAQDFKTDLRFQSA	R	E	I	F	K	T	1	0	0	1	0	1	1	0	0	1	0	1	0	1	0	0	0	0	0	0	0	0	7	0	849.423	E0CZ27;A1L0U3;F8WI35;A1L0V4;B9EI85;P84244;P84228;P68433;P02301	E0CZ27	74	80	H3f3a;Hist1h3e;Hist1h3i;Hist2h3b;Hist1h3b;Hist1h3a;H3f3c	Histone H3;Histone H3.3;Histone H3.2;Histone H3.1;Histone H3.3C	yes	no	2	0.0060591	102.71			By MS/MS
EIQTAVR	KRSTITSREIQTAVRL	REIQTAVRLLLPGELA	R	E	I	V	R	L	1	1	0	0	0	1	1	0	0	1	0	0	0	0	0	0	1	0	0	1	0	0	7	0	815.45	A0JLV3;B2RVD5;B2RTK3;Q8CBB6;Q921L4;Q8CGP2;Q8CGP1;Q6ZWY9;Q64525;Q64478;Q64475;P10854;P10853;Q8CGP2-2;A0JNS9;P70696	A0JLV3	91	97	Hist1h2bj;Hist1h2bk;Hist1h2bm;Hist1h2br;LOC665622;Hist1h2bp;Hist1h2bc;Hist2h2bb;Hist1h2bh;Hist1h2bb;Hist1h2bf;Hist1h2ba	Histone H2B;Histone H2B type 1-P;Histone H2B type 1-K;Histone H2B type 1-C/E/G;Histone H2B type 2-B;Histone H2B type 1-H;Histone H2B type 1-B;Histone H2B type 1-M;Histone H2B type 1-F/J/L;Histone H2B type 1-A	yes	no	2	0.015065	91.906		By matching	By MS/MS		By MS/MS
ELIIGDR	VPIGRGQRELIIGDRQ	RELIIGDRQTGKTSIA	R	E	L	D	R	Q	0	1	0	1	0	0	1	1	0	2	1	0	0	0	0	0	0	0	0	0	0	0	7	0	814.455	D3Z6F5;Q03265;Q3U452	D3Z6F5	158	164	Atp5a1	ATP synthase subunit alpha;ATP synthase subunit alpha, mitochondrial	yes	no	2	0.0056442	110.14
ELLTDFR	NQTLAQHRELLTDFRE	RELLTDFREAAPPFRG	R	E	L	F	R	E	0	1	0	1	0	0	1	0	0	0	2	0	0	1	0	0	1	0	0	0	0	0	7	0	892.465	D3Z6P0-2;D3Z6P0	D3Z6P0-2	292	298	Pdia2	Protein disulfide-isomerase A2	yes	no	2	0.0031759	132.09			By MS/MS
EVSTYIK	KRYEEIVKEVSTYIKK	KEVSTYIKKIGYNPDT	K	E	V	I	K	K	0	0	0	0	0	0	1	0	0	1	0	1	0	0	0	1	1	0	1	1	0	0	7	0	838.444	Q58E64;Q3UA81;P10126;Q3TII3;Q3UZQ3;D3YZ68;D3Z3I8	Q58E64	173	179	Eef1a1	Elongation factor 1-alpha;Elongation factor 1-alpha 1	yes	no	2	0.031325	79.116		By matching	By matching
FDLMYAK	AWARLDHKFDLMYAKR	KFDLMYAKRAFVHWYV	K	F	D	A	K	R	1	0	0	1	0	0	0	0	0	0	1	1	1	1	0	0	0	0	1	0	0	0	7	0	886.426	P05213;Q99KA2;Q3UX10;P68369;Q52L87;Q3TIZ0;P68373;Q5FW91;P05214;Q9D9Y2;Q9JJZ2;A0A0A0MQA5;P68368	P05213	395	401	Tuba1b;Tubal3;Tuba1a;Tuba1c;Tuba3a;Tuba8;Tuba4a	Tubulin alpha-1B chain;Tubulin alpha chain-like 3;Tubulin alpha-1A chain;Tubulin alpha-1C chain;Tubulin alpha-3 chain;Tubulin alpha-8 chain;Tubulin alpha-4A chain	no	no	2	0.0071419	97.068
FEPFSNK	RFYALSAKFEPFSNKG	KFEPFSNKGQTLVVQF	K	F	E	N	K	G	0	0	1	0	0	0	1	0	0	0	0	1	0	2	1	1	0	0	0	0	0	0	7	0	867.413	B2MWM9;P14211;Q3UWP8	B2MWM9	81	87	Calr	Calreticulin	yes	no	2	0.020611	85.359					By MS/MS
FLDAGHK	RVMMVAKKFLDAGHKL	KFLDAGHKLNFAVASR	K	F	L	H	K	L	1	0	0	1	0	0	0	1	1	0	1	1	0	1	0	0	0	0	0	0	0	0	7	0	786.402	P27773	P27773	290	296	Pdia3	Protein disulfide-isomerase A3	yes	yes	2	0.032184	78.616					By MS/MS
FLPLFDR	MAGQAFRKFLPLFDRV	KFLPLFDRVLVERSAA	K	F	L	D	R	V	0	1	0	1	0	0	0	0	0	0	2	0	0	2	1	0	0	0	0	0	0	0	7	0	906.496	Q4KL76;Q64433	Q4KL76	9	15	Hspe1	10 kDa heat shock protein, mitochondrial	yes	no	2	0.0034924	124.34			By matching		By MS/MS
FLSEMLK	TRSGDYYRFLSEMLKS	RFLSEMLKSLEDLKLK	R	F	L	L	K	S	0	0	0	0	0	0	1	0	0	0	2	1	1	1	0	1	0	0	0	0	0	0	7	0	866.457	E9Q557;E9PZW0	E9Q557	1028	1034	Dsp	Desmoplakin	yes	no	2	0.0111	97.068			By MS/MS
FNSFTVR	AQVFKNPKFNSFTVRN	KFNSFTVRNDITLLKL	K	F	N	V	R	N	0	1	1	0	0	0	0	0	0	0	0	0	0	2	0	1	1	0	0	1	0	0	7	0	869.44	Q9CR35	Q9CR35	112	118	Ctrb1	Chymotrypsinogen B;Chymotrypsin B chain A;Chymotrypsin B chain B;Chymotrypsin B chain C	yes	yes	2	0.0022763	164.24		By MS/MS	By matching	By MS/MS	By matching
FPDENFK	GKSIYGERFPDENFKL	RFPDENFKLKHYGPGW	R	F	P	F	K	L	0	0	1	1	0	0	1	0	0	0	0	1	0	2	1	0	0	0	0	0	0	0	7	0	895.408	Q9DCY1;P24369	Q9DCY1	123	129	Ppib	Peptidyl-prolyl cis-trans isomerase;Peptidyl-prolyl cis-trans isomerase B	yes	no	2	0.018043	82.671			By MS/MS
FTLTESR	AHTNTVWKFTLTESRL	KFTLTESRLEVEHRSV	K	F	T	S	R	L	0	1	0	0	0	0	1	0	0	0	1	0	0	1	0	1	2	0	0	0	0	0	7	0	852.434	E9Q704;F8VQA4;P97467;Q3V1A8;F7D4K4;A1L331	E9Q704	703	709	Pam	Peptidyl-glycine alpha-amidating monooxygenase;Peptidylglycine alpha-hydroxylating monooxygenase;Peptidyl-alpha-hydroxyglycine alpha-amidating lyase	yes	no	2	0.0041084	117.16	By matching		By MS/MS
FVEGVYR	HGLTTDEKFVEGVYRV	KFVEGVYRVELDTKSY	K	F	V	Y	R	V	0	1	0	0	0	0	1	1	0	0	0	0	0	1	0	0	0	0	1	2	0	0	7	0	868.444	Q5M9K1;P07309;Q9D6A4	Q5M9K1	84	90	Ttr	Transthyretin	yes	no	2	0.0020787	144.29			By MS/MS
FVLSSGK	KHKSDFGKFVLSSGKF	KFVLSSGKFYGDLEKD	K	F	V	G	K	F	0	0	0	0	0	0	0	1	0	0	1	1	0	1	0	2	0	0	0	1	0	0	7	0	736.412	B2MWM9;P14211;Q3UWP8	B2MWM9	49	55	Calr	Calreticulin	yes	no	2	0.0066817	105.39			By MS/MS		By MS/MS
FYGDLEK	KFVLSSGKFYGDLEKD	KFYGDLEKDKGLQTSQ	K	F	Y	E	K	D	0	0	0	1	0	0	1	1	0	0	1	1	0	1	0	0	0	0	1	0	0	0	7	0	870.412	B2MWM9;P14211;Q3UWP8	B2MWM9	56	62	Calr	Calreticulin	yes	no	1;2	0.019948	95.352			By MS/MS		By matching
GFFYTPK	LYLVCGERGFFYTPKS	RGFFYTPKSRREVEDP	R	G	F	P	K	S	0	0	0	0	0	0	0	1	0	0	0	1	0	2	1	0	1	0	1	0	0	0	7	0	858.428	Q545I7;P01325	Q545I7	47	53	Ins1	Insulin-1;Insulin-1 B chain;Insulin-1 A chain	yes	no	1;2	0.015772	99.279	By MS/MS	By matching	By MS/MS	By MS/MS	By MS/MS
GHYTIGK	DAANNYARGHYTIGKE	RGHYTIGKEIIDLVLD	R	G	H	G	K	E	0	0	0	0	0	0	0	2	1	1	0	1	0	0	0	0	1	0	1	0	0	0	7	0	774.402	P05213;Q99KA2;O89052;P68369;Q52L87;Q3TIZ0;P68373;Q5FW91;P05214;A0A0A0MQA5;P68368;A0A087WRB4;A0A087WQS4	P05213	106	112	Tuba1b;Tuba1a;Tuba1c;Tuba3a;Tuba4a	Tubulin alpha-1B chain;Tubulin alpha-1A chain;Tubulin alpha-1C chain;Tubulin alpha-3 chain;Tubulin alpha-4A chain	no	no	2	0.002121	143.02			By matching
GVDLLVK	VLDWLIEKGVDLLVKD	KGVDLLVKDKESGWTA	K	G	V	V	K	D	0	0	0	1	0	0	0	1	0	0	2	1	0	0	0	0	0	0	0	2	0	0	7	0	742.459	A0A087WNN3;Q6ZPR6-2;Q6ZPR6	A0A087WNN3	75	81	Ibtk	Inhibitor of Bruton tyrosine kinase	yes	no	2	0.022328	78.616	By MS/MS	By MS/MS	By matching
HLIGGIK	ENQSKTHRHLIGGIKF	RHLIGGIKFGVGVFNL	R	H	L	I	K	F	0	0	0	0	0	0	0	2	1	2	1	1	0	0	0	0	0	0	0	0	0	0	7	0	736.46	Q9CUG7;Q0VF76	Q9CUG7	75	81	Ttc39d		yes	no	2	0.0021374	142.53		By MS/MS		By MS/MS
HLQLAIR	KKTRIIPRHLQLAIRN	RHLQLAIRNDEELNKL	R	H	L	I	R	N	1	1	0	0	0	1	0	0	1	1	2	0	0	0	0	0	0	0	0	0	0	0	7	0	849.518	F8WIX8;A0A0N4SV66;A0AUV1;A3KPD0;Q8CGP4;Q149V4;B2RWH3;B2RVF0;A2AB79;Q8CGP6;Q8R1M2;Q64523;Q8CGP7;Q8CGP5;Q8BFU2;Q6GSS7;P22752;B2RVP5;Q3THW5;P0C0S6;P27661;Q8R029;Q3TFU6	F8WIX8	78	84	Hist1h2al;Hist1h2ah;Hist1h2aa;Hist2h2ac;Hist2h2aa1;Hist1h2ad;Hist3h2a;H2afj;Hist1h2ak;Hist1h2af;Hist1h2ab;H2afv;H2afz;H2afx	Histone H2A;Histone H2A type 1-H;Histone H2A.J;Histone H2A type 2-C;Histone H2A type 1-K;Histone H2A type 1-F;Histone H2A type 3;Histone H2A type 2-A;Histone H2A type 1;Histone H2A.V;Histone H2A.Z;Histone H2AX	yes	no	2	0.0019535	148.07	By matching		By MS/MS
HTGAVLK	VEENVDLKHTGAVLKG	KHTGAVLKGPFSRYDY	K	H	T	L	K	G	1	0	0	0	0	0	0	1	1	0	1	1	0	0	0	0	1	0	0	1	0	0	7	0	724.423	Q5RKP4;Q8BMR3;Q3U900;Q91YQ5	Q5RKP4	252	258	Rpn1	Dolichyl-diphosphooligosaccharide--protein glycosyltransferase subunit 1	yes	no	2	0.012079	95.793		By matching		By matching	By MS/MS
IDVEILR	TTEVEENRIDVEILRM	RIDVEILRMVVHDQDL	R	I	D	L	R	M	0	1	0	1	0	0	1	0	0	2	1	0	0	0	0	0	0	0	0	1	0	0	7	0	856.502	Q8C4K6;Q32ME9;Q2VPA9;P55849-2;P55849	Q8C4K6	368	374	Dsc1	Desmocollin-1	yes	no	2	0.0019083	170.73	By MS/MS		By MS/MS
IFGGEIK	FTEQTAPKIFGGEIKT	KIFGGEIKTHILLFLP	K	I	F	I	K	T	0	0	0	0	0	0	1	2	0	2	0	1	0	1	0	0	0	0	0	0	0	0	7	0	762.428	Q3UDR2;Q3URP6;Q3U738;Q3TWE3;Q3TIM0;Q3THC3;Q3TF72;P09103;Q3TGS0;Q3UBY9;Q3UJA8;Q3UA23;Q3TT76	Q3UDR2	250	256	P4hb	Protein disulfide-isomerase	yes	no	2	0.014635	86.472			By matching
IIAPPER	APSTMKIKIIAPPERK	KIIAPPERKYSVWIGG	K	I	I	E	R	K	1	1	0	0	0	0	1	0	0	2	0	0	0	0	2	0	0	0	0	0	0	0	7	0	794.465	Q3UAF7;Q3UAF6;Q3U5R4;B2RRX1;P60710;Q3UAA9;Q3UA89;Q3U939;Q3U804;Q3UGS0;Q61276;Q3TIJ9;Q3UCF8;E9Q1F2;Q61272;Q99NC5;Q6GQT3;E9Q3M9;Q4KL81;P63260;Q3TSB7;B1ATY1;Q8BFZ3;Q3UBP6;Q3UBQ4;Q9QZ83	Q3UAF7	329	335	Actb;Acta1;2010300C02Rik;Actg1;Actbl2	Actin, cytoplasmic 1;Actin, cytoplasmic 1, N-terminally processed;Actin, cytoplasmic 2;Actin, cytoplasmic 2, N-terminally processed;Beta-actin-like protein 2	no	no	2	0.0042435	116.54	By MS/MS	By MS/MS	By MS/MS	By MS/MS	By MS/MS
IILEALR	LSEDEWMRIILEALRQ	RIILEALRQAENEPPS	R	I	I	L	R	Q	1	1	0	0	0	0	1	0	0	2	2	0	0	0	0	0	0	0	0	0	0	0	7	0	826.528	Q03517;Q4W8U9	Q03517	115	121	Scg2	Secretogranin-2;Secretoneurin;Manserin	yes	no	2	0.0019535	174.64	By MS/MS		By MS/MS	By MS/MS	By MS/MS
IIVDELK	KIWDLEGKIIVDELKQ	KIIVDELKQEVISTSS	K	I	I	L	K	Q	0	0	0	1	0	0	1	0	0	2	1	1	0	0	0	0	0	0	0	1	0	0	7	0	828.496	P68040	P68040	265	271	Gnb2l1	Guanine nucleotide-binding protein subunit beta-2-like 1;Guanine nucleotide-binding protein subunit beta-2-like 1, N-terminally processed	yes	yes	2	0.036441	77.058
IPVGSLK	RLAKVSKRIPVGSLKN	RIPVGSLKNEDTPNRQ	R	I	P	L	K	N	0	0	0	0	0	0	0	1	0	1	1	1	0	0	1	1	0	0	0	1	0	0	7	0	712.448	Q03517;Q4W8U9	Q03517	569	575	Scg2	Secretogranin-2;Secretoneurin;Manserin	yes	no	2	0.024036	83.364			By MS/MS
ISDANLR	DSPQFLQKISDANLRV	KISDANLRVWAEELHK	K	I	S	L	R	V	1	1	1	1	0	0	0	0	0	1	1	0	0	0	0	1	0	0	0	0	0	0	7	0	787.419	D6RI51;Q9JLT2	D6RI51	116	122	Treh	Trehalase	yes	no	2	0.0019096	152.63	By MS/MS	By matching	By MS/MS		By MS/MS
ITITNDK	KSTGKENKITITNDKG	KITITNDKGRLSKEDI	K	I	T	D	K	G	0	0	1	1	0	0	0	0	0	2	0	1	0	0	0	0	2	0	0	0	0	0	7	0	803.439	Q3UBA6;Q3TZJ3;Q3TH56;Q3TEK2;P63017;Q504P4;Q3U9L2;Q3TF16;Q3UDS0;Q3ULM1;Q3TRH3;Q3KQJ4;Q3TH04;Q3UXU1;B7U582;P17156;Q3UBR0;B2CSK2;A1L347;Q3TU85;Q3TAI8;A1E2B8;P16627;Q61696;P17879;Q61698;Q9QWU1;O88688;Q91ZU5;Q91ZU4	Q3UBA6	501	507	Hspa8;Hspa2;Hspa1l;Hspa1b;Hspa1a;Hsp70.3;Hsc70t	Heat shock cognate 71 kDa protein;Heat shock-related 70 kDa protein 2;Heat shock 70 kDa protein 1-like;Heat shock 70 kDa protein 1A;Heat shock 70 kDa protein 1B	yes	no	2	0.011127	97.033	By MS/MS		By matching		By MS/MS
IVYVNEK	RNFPDLDRIVYVNEKE	RIVYVNEKEGGPNNHL	R	I	V	E	K	E	0	0	1	0	0	0	1	0	0	1	0	1	0	0	0	0	0	0	1	2	0	0	7	0	863.475	Q543R4;Q00493	Q543R4	197	203	Cpe	Carboxypeptidase E	yes	no	2	0.0039688	117.93			By MS/MS
IYEENDR	IVHKIATRIYEENDRG	RIYEENDRGVFDKIVS	R	I	Y	D	R	G	0	1	1	1	0	0	2	0	0	1	0	0	0	0	0	0	0	0	1	0	0	0	7	0	937.414	P47867;P47867-2	P47867	162	168	Scg3	Secretogranin-3	yes	no	2	0.030998	79.307			By MS/MS
KPTVFTR	SMGCNVARKPTVFTRV	RKPTVFTRVSAYISWM	R	K	P	T	R	V	0	1	0	0	0	0	0	0	0	0	0	1	0	1	1	0	2	0	0	1	0	0	7	1	847.492	Q91X79;Q9CQ52	Q91X79	245	251	Cela1;Cela3b	Chymotrypsin-like elastase family member 1;Chymotrypsin-like elastase family member 3B	no	no	2	0.048577	91.9		By MS/MS		By matching
LADGLQK	EGAKMAVRLADGLQKM	RLADGLQKMVPLLNKN	R	L	A	Q	K	M	1	0	0	1	0	1	0	1	0	0	2	1	0	0	0	0	0	0	0	0	0	0	7	0	743.418	Q02257	Q02257	266	272	Jup	Junction plakoglobin	yes	yes	2	0.0024947	132.96	By MS/MS		By MS/MS
LANFLVR	TATCATQRLANFLVRS	RLANFLVRSSNNLGPV	R	L	A	V	R	S	1	1	1	0	0	0	0	0	0	0	2	0	0	1	0	0	0	0	0	1	0	0	7	0	831.497	P12968	P12968	49	55	Iapp	Islet amyloid polypeptide	yes	yes	2	0.0020787	153.61	By MS/MS		By MS/MS		By MS/MS
LATLNEK	FDMSCRSRLATLNEKL	RLATLNEKLTALERRI	R	L	A	E	K	L	1	0	1	0	0	0	1	0	0	0	2	1	0	0	0	0	1	0	0	0	0	0	7	0	787.444	Q91VR8	Q91VR8	47	53	Brk1	Protein BRICK1	yes	yes	1	3.0984e-05	155.51		By MS/MS
LDHLAEK	NEIRRLERLDHLAEKF	RLDHLAEKFRQKASIH	R	L	D	E	K	F	1	0	0	1	0	0	1	0	1	0	2	1	0	0	0	0	0	0	0	0	0	0	7	0	824.439	Q1A602;Q3ULT2;Q3UDJ7;P57780;A1BN54;Q7TPR4;E9Q2W9	Q1A602	411	417	Actn4;Actn1	Alpha-actinin-4;Alpha-actinin-1	yes	no	2	0.04068	73.665			By MS/MS
LEELLIK	CSGGDRKKLEELLIKT	KLEELLIKTKKEKPTF	K	L	E	I	K	T	0	0	0	0	0	0	2	0	0	1	3	1	0	0	0	0	0	0	0	0	0	0	7	0	856.527	Q3TY72;Q62383	REV__Q6A078	375	381	Supt6;Supt6h	Transcription elongation factor SPT6	yes	no	2	0.0025797	132.09		By matching		By MS/MS	By matching
LEELTLR	ELARSVQKLEELTLRD	KLEELTLRDLEKQERE	K	L	E	L	R	D	0	1	0	0	0	0	2	0	0	0	3	0	0	0	0	0	1	0	0	0	0	0	7	0	872.497	Q9JKR6	Q9JKR6	723	729	Hyou1	Hypoxia up-regulated protein 1	yes	yes	2	0.0062	107.59
LELAQYR	KQVAGTMKLELAQYRE	KLELAQYREVAAFAQF	K	L	E	Y	R	E	1	1	0	0	0	1	1	0	0	0	2	0	0	0	0	0	0	0	1	0	0	0	7	0	891.481	D3Z6F5;Q03265;Q3U452	D3Z6F5	385	391	Atp5a1	ATP synthase subunit alpha;ATP synthase subunit alpha, mitochondrial	yes	no	2	0.022526	95.793			By matching
LHNLNTK	DIKAVLDKLHNLNTKW	KLHNLNTKWFSQGSRP	K	L	H	T	K	W	0	0	2	0	0	0	0	0	1	0	2	1	0	0	0	0	1	0	0	0	0	0	7	0	838.466	Q8C5B4;E9PV85;Q61297;P00688	P00688	226	232	Amy2a1;Amy2	Alpha-amylase;Pancreatic alpha-amylase	no	no	2	0.0036757	120.92	By MS/MS	By MS/MS	By matching
LQQENLK	VFASEVRKLQQENLKP	KLQQENLKPQEQLTLE	K	L	Q	L	K	P	0	0	1	0	0	2	1	0	0	0	2	1	0	0	0	0	0	0	0	0	0	0	7	0	871.476	Q80WS3	Q80WS3	280	286	Fbll1	rRNA/tRNA 2-O-methyltransferase fibrillarin-like protein 1	yes	yes	2	0.0082142	170.73		By MS/MS			By MS/MS
LSLLINR	SLSCDLHKLSLLINRH	KLSLLINRHT______	K	L	S	N	R	H	0	1	1	0	0	0	0	0	0	1	3	0	0	0	0	1	0	0	0	0	0	0	7	0	827.523	A0A0N4SUN5	A0A0N4SUN5	182	188			yes	yes	2	0.0032255	150.02		By MS/MS	By MS/MS
LSVDYGK	FTSLLMERLSVDYGKK	RLSVDYGKKSKLEFSI	R	L	S	G	K	K	0	0	0	1	0	0	0	1	0	0	1	1	0	0	0	1	0	0	1	1	0	0	7	0	780.402	P05213;Q99KA2;P68369;Q52L87;Q3TIZ0;P68373;Q5FW91;P05214;A0A0A0MQA5;P68368	P05213	157	163	Tuba1b;Tuba1a;Tuba1c;Tuba3a;Tuba4a	Tubulin alpha-1B chain;Tubulin alpha-1A chain;Tubulin alpha-1C chain;Tubulin alpha-3 chain;Tubulin alpha-4A chain	no	no	2	0.032934	78.178
LTGMAFR	VIPELNGKLTGMAFRV	KLTGMAFRVPTPNVSV	K	L	T	F	R	V	1	1	0	0	0	0	0	1	0	0	1	0	1	1	0	0	1	0	0	0	0	0	7	0	794.411	S4R257;D2KHZ9;A0A0A0MQF6;P16858;S4R1W1;Q3TUZ9;D3YYI5;Q3V2I5;A0A0R4J0X7;S4R2G5;Q64467	S4R257	183	189	Gapdh;GAPDH;Gm3839;Gm10481;Gm7293;Gapdhs	Glyceraldehyde-3-phosphate dehydrogenase;Glyceraldehyde-3-phosphate dehydrogenase, testis-specific	yes	no	2	0.0022239	154.11		By MS/MS	By MS/MS	By MS/MS	By matching
LTIQGLK	NKIHPVDKLTIQGLKD	KLTIQGLKDFAPGKPL	K	L	T	L	K	D	0	0	0	0	0	1	0	1	0	1	2	1	0	0	0	0	1	0	0	0	0	0	7	0	771.485	Q99KI0	Q99KI0	724	730	Aco2	Aconitate hydratase, mitochondrial	yes	yes	2	0.014473	92.677			By matching
LTLLNPK	AKSGASLKLTLLNPKG	KLTLLNPKGRIWTMVA	K	L	T	P	K	G	0	0	1	0	0	0	0	0	0	0	3	1	0	0	1	0	1	0	0	0	0	0	7	0	797.501	Q3TED3;Q3V117;Q91V92;Q3UEA1;Q3TS02	Q3TED3	266	272	Acly	ATP-citrate synthase	yes	no	2	0.0067233	105.2		By matching	By matching
LVFDGLR	EWTVDSSKLVFDGLRK	KLVFDGLRKKVTAMQL	K	L	V	L	R	K	0	1	0	1	0	0	0	1	0	0	2	0	0	1	0	0	0	0	0	1	0	0	7	0	818.465	E9Q557;E9PZW0	E9Q557	1978	1984	Dsp	Desmoplakin	yes	no	2	0.0082779	100.74			By MS/MS
LVQLLVK	QEAAVIPRLVQLLVKA	RLVQLLVKAHQDAQRH	R	L	V	V	K	A	0	0	0	0	0	1	0	0	0	0	3	1	0	0	0	0	0	0	0	2	0	0	7	0	811.553	Q02257	Q02257	527	533	Jup	Junction plakoglobin	yes	yes	2	0.0031536	126.24			By MS/MS
MEGHDPK	________________	________________	-	M	E	P	K	E	0	0	0	1	0	0	1	1	1	0	0	1	1	0	1	0	0	0	0	0	0	0	7	0	812.349	E9Q7H5;Q6PFA7;B2RXM2;Q0VG47;J3QNY1;Q8BG05-2	E9Q7H5	1	7	Gm8991;Hnrnpa3;Gm6793;Gm9242	Heterogeneous nuclear ribonucleoprotein A3	yes	no	2	0.055296	42.869				By matching
MKSTFLK	LPSVTEMKMKSTFLKA	KMKSTFLKAKHRADIV	K	M	K	L	K	A	0	0	0	0	0	0	0	0	0	0	1	2	1	1	0	1	1	0	0	0	0	0	7	1	853.473	A0A0R4J1D3;A0A0R4J020;Q3U1U7-3;Q3U1U7-2;Q3U1U7	A0A0R4J1D3	151	157	Ahrr	Aryl hydrocarbon receptor repressor	yes	no	1	0.01807	81.784					By MS/MS
MMMQSGR	PFDTVRRRMMMQSGRK	RMMMQSGRKGTDIMYT	R	M	M	G	R	K	0	1	0	0	0	1	0	1	0	0	0	0	3	0	0	1	0	0	0	0	0	0	7	0	839.345	Q545A2;P51881;Q8BVI9;P48962	Q545A2	238	244	Slc25a5;Slc25a4	ADP/ATP translocase 2;ADP/ATP translocase 2, N-terminally processed;ADP/ATP translocase 1	yes	no	2	0.017014	89.369
NDITLLK	KFNSFTVRNDITLLKL	RNDITLLKLATPAQFS	R	N	D	L	K	L	0	0	1	1	0	0	0	0	0	1	2	1	0	0	0	0	1	0	0	0	0	0	7	0	815.475	Q9CR35	Q9CR35	119	125	Ctrb1	Chymotrypsinogen B;Chymotrypsin B chain A;Chymotrypsin B chain B;Chymotrypsin B chain C	yes	yes	2	0.01528	95.909	By MS/MS	By matching	By matching	By matching	By matching
NSPLVSR	QPLSLLLKNSPLVSRL	KNSPLVSRLTLYDIAH	K	N	S	S	R	L	0	1	1	0	0	0	0	0	0	0	1	0	0	0	1	2	0	0	0	1	0	0	7	0	771.424	P08249;A0A0G2JGY4	P08249	46	52	Mdh2	Malate dehydrogenase, mitochondrial	yes	no	2	0.038023	75.213			By MS/MS
NTVVPTK	VMTKLIPRNTVVPTKK	RNTVVPTKKSQIFSTA	R	N	T	T	K	K	0	0	1	0	0	0	0	0	0	0	0	1	0	0	1	0	2	0	0	2	0	0	7	0	757.433	Q3U9G2;Q3TWF2;P20029;Q9DC41;Q3TKF8;Q3TI47;Q3U7T8;Q3U6V3;Q3UEM8;Q3TUS2	Q3U9G2	441	447	Hspa5	78 kDa glucose-regulated protein	yes	no	2	0.038023	75.213			By MS/MS
QAFYIPR	NVGHNKLKQAFYIPRN	KQAFYIPRNLEHLYLQ	K	Q	A	P	R	N	1	1	0	0	0	1	0	0	0	1	0	0	0	1	1	0	0	0	1	0	0	0	7	0	893.476	Q501L5;O35103;Q8C7G2	Q501L5	294	300	Omd	Osteomodulin	yes	no	2	0.04979	82.913		By MS/MS
SEVDMLK	LIRIMVSRSEVDMLKI	RSEVDMLKIRSEFKRK	R	S	E	L	K	I	0	0	0	1	0	0	1	0	0	0	1	1	1	0	0	1	0	0	0	1	0	0	7	0	820.4	Q542G9;P07356;Q3UCD3;Q9CZI7;Q99KH3;B0V2N5	Q542G9	296	302	Anxa2	Annexin;Annexin A2	yes	no	2	0.031325	79.116			By MS/MS
SGMNVAR	EMLKEMIKSGMNVARL	KSGMNVARLNFSHGTH	K	S	G	A	R	L	1	1	1	0	0	0	0	1	0	0	0	0	1	0	0	1	0	0	0	1	0	0	7	0	733.354	P52480;P52480-2	P52480	67	73	Pkm	Pyruvate kinase PKM	no	no	2	0.046842	88.029
SLLATMK	KNDLNLKKSLLATMKT	KSLLATMKTELQKAQQ	K	S	L	M	K	T	1	0	0	0	0	0	0	0	0	0	2	1	1	0	0	1	1	0	0	0	0	0	7	0	762.431	E9Q557;E9PZW0	E9Q557	835	841	Dsp	Desmoplakin	yes	no	2	0.013144	89.55			By MS/MS
STELLIR	REIRRYQKSTELLIRK	KSTELLIRKLPFQRLV	K	S	T	I	R	K	0	1	0	0	0	0	1	0	0	1	2	0	0	0	0	1	1	0	0	0	0	0	7	0	830.486	E0CZ27;A1L0U3;F8WI35;A1L0V4;B9EI85;P84244;P84228;P68433;P02301	E0CZ27	58	64	H3f3a;Hist1h3e;Hist1h3i;Hist2h3b;Hist1h3b;Hist1h3a;H3f3c	Histone H3;Histone H3.3;Histone H3.2;Histone H3.1;Histone H3.3C	yes	no	2	0.0022172	164.89	By MS/MS		By MS/MS
SVDEIIR	INDLPVGRSVDEIIRL	RSVDEIIRLVQAFQFT	R	S	V	I	R	L	0	1	0	1	0	0	1	0	0	2	0	0	0	0	0	1	0	0	0	1	0	0	7	0	830.45	P35700;B1AXW5;B1AXW6;Q3U9J9	P35700	152	158	Prdx1	Peroxiredoxin-1	yes	no	2	0.019239	86.472
SYWEDNK	FPPEETLKSYWEDNKN	KSYWEDNKNSLISYLE	K	S	Y	N	K	N	0	0	1	1	0	0	1	0	0	0	0	1	0	0	0	1	0	1	1	0	0	0	7	0	940.393	Q543R4;Q00493	Q543R4	356	362	Cpe	Carboxypeptidase E	yes	no	2	0.022777	84.097			By MS/MS		By MS/MS
TEWLDGK	QFFICTAKTEWLDGKH	KTEWLDGKHVVFGKVK	K	T	E	G	K	H	0	0	0	1	0	0	1	1	0	0	1	1	0	0	0	0	1	1	0	0	0	0	7	0	847.408	Q5SVY2;Q3UAJ1;Q3TE63;P17742;Q9CZK9;F8VPN3	Q5SVY2	119	125	Ppia;Gm5160	Peptidyl-prolyl cis-trans isomerase;Peptidyl-prolyl cis-trans isomerase A;Peptidyl-prolyl cis-trans isomerase A, N-terminally processed	yes	no	2	0.01528	91.626			By MS/MS
TFEINPR	NYYASQKKTFEINPRH	KTFEINPRHPLIRDML	K	T	F	P	R	H	0	1	1	0	0	0	1	0	0	1	0	0	0	1	1	0	1	0	0	0	0	0	7	0	875.45	Q91V38;Q3UAD6;P08113;Q3UBU0;Q3TUD6;Q8CCY5;F7C312;Q9CW12	Q91V38	684	690	Hsp90b1	Endoplasmin	yes	no	2	0.0040077	119.57			By MS/MS
TFGAIGR	IAGEAGKRTFGAIGRI	RTFGAIGRITGLDPAE	R	T	F	G	R	I	1	1	0	0	0	0	0	2	0	1	0	0	0	1	0	0	1	0	0	0	0	0	7	0	720.392	Q6P8U6	Q6P8U6	182	188	Pnlip	Pancreatic triacylglycerol lipase	yes	yes	2	0.025714	82.386			By MS/MS
TGCIGAK	SIADKKRRTGCIGAKH	RTGCIGAKHRISKEEA	R	T	G	A	K	H	1	0	0	0	1	0	0	2	0	1	0	1	0	0	0	0	1	0	0	0	0	0	7	0	705.348	Q8VC94;A2BH06;E9PZB3;E9PYL9;Q9CXW4	Q8VC94	137	143	Rpl11;Gm5093;Gm10036	60S ribosomal protein L11	yes	no	1;2	0.020881	94.669	By matching	By matching	By matching	By matching	By MS/MS
TGVYEEK	IFRHKNPKTGVYEEKH	KTGVYEEKHAKRPDAD	K	T	G	E	K	H	0	0	0	0	0	0	2	1	0	0	0	1	0	0	0	0	1	0	1	1	0	0	7	0	824.392	Q5SUC3;Q3TXE5;P35564	Q5SUC3	212	218	Canx	Calnexin	yes	no	2	0.025963	82.241
TLIDFVK	ETLITIMKTLIDFVKM	KTLIDFVKMMVKYGTI	K	T	L	V	K	M	0	0	0	1	0	0	0	0	0	1	1	1	0	1	0	0	1	0	0	1	0	0	7	0	834.485	P47867;P47867-2	P47867	308	314	Scg3	Secretogranin-3	yes	no	2	0.031325	79.116	By MS/MS		By matching
TLYGFGG	YALKRQGRTLYGFGG_	RTLYGFGG________	R	T	L	G	G	-	0	0	0	0	0	0	0	3	0	0	1	0	0	1	0	0	1	0	1	0	0	0	7	0	713.338	B2RTM0;P62806;Q61667	B2RTM0	97	103	Hist2h4;Hist1h4a	Histone H4	yes	no	1	0.035698	79.935			By matching
TMVVHEK	GEHSIIGRTMVVHEKQ	RTMVVHEKQDDLGKGG	R	T	M	E	K	Q	0	0	0	0	0	0	1	0	1	0	0	1	1	0	0	0	1	0	0	2	0	0	7	0	842.432	P08228	P08228	117	123	Sod1	Superoxide dismutase [Cu-Zn]	yes	yes	2	0.027723	81.215
TVAYTEK	LANKFEDKTVAYTEKK	KTVAYTEKKMTSGKIK	K	T	V	E	K	K	1	0	0	0	0	0	1	0	0	0	0	1	0	0	0	0	2	0	1	1	0	0	7	0	810.412	P27773	P27773	219	225	Pdia3	Protein disulfide-isomerase A3	yes	yes	2	0.017188	89.142			By matching
VGWEELR	YDTDRDGRVGWEELRN	RVGWEELRNATYGHYE	R	V	G	L	R	N	0	1	0	0	0	0	2	1	0	0	1	0	0	0	0	0	0	1	0	1	0	0	7	0	887.45	D3Z3A9;D3Z7T1;Q8BH97	D3Z3A9	133	139	Rcn3	Reticulocalbin-3	yes	no	2	0.037018	94.262		By MS/MS
VIADNVK	KVVFEQTKVIADNVKD	KVIADNVKDWSKVVLA	K	V	I	V	K	D	1	0	1	1	0	0	0	0	0	1	0	1	0	0	0	0	0	0	0	2	0	0	7	0	757.433	P17751;H7BXC3	P17751	200	206	Tpi1	Triosephosphate isomerase	yes	no	2	0.0062604	107.32			By matching
VKENFDK	DCRVSSFRVKENFDKA	RVKENFDKARFSGLWY	R	V	K	D	K	A	0	0	1	1	0	0	1	0	0	0	0	2	0	1	0	0	0	0	0	1	0	0	7	1	878.45	H7BWY6;Q00724	H7BWY6	73	79	Rbp4	Retinol-binding protein 4	yes	no	2	0.02141	117.4
VLAAVYK	RCQYVTEKVLAAVYKA	KVLAAVYKALSDHHVY	K	V	L	Y	K	A	2	0	0	0	0	0	0	0	0	0	1	1	0	0	0	0	0	0	1	2	0	0	7	0	762.464	Q5FWB7;A6ZI44;P05064;D3YWI1;Q9CPQ9;A6ZI46;A6ZI47;P05063;Q3UER1;Q3TJ66;Q91Y97	Q5FWB7	209	215	Aldoa;Aldoart1;Aldoart2;Aldoc;Aldob	Fructose-bisphosphate aldolase;Fructose-bisphosphate aldolase A;Fructose-bisphosphate aldolase C;Fructose-bisphosphate aldolase B	yes	no	2	0.037855	75.311			By MS/MS
VLAQLLR	EAEDQQARVLAQLLRA	RVLAQLLRAWGSPRAS	R	V	L	L	R	A	1	1	0	0	0	1	0	0	0	0	3	0	0	0	0	0	0	0	0	1	0	0	7	0	811.528	Q9QXV0	Q9QXV0	105	111	Pcsk1n	ProSAAS;KEP;Big SAAS;Little SAAS;Big PEN-LEN;PEN;PEN-20;PEN-19;Little LEN;Big LEN	yes	yes	2	0.005305	111.69			By MS/MS
VLLNQLR	CLLDSNSRVLLNQLRA	RVLLNQLRAVFDQIIE	R	V	L	L	R	A	0	1	1	0	0	1	0	0	0	0	3	0	0	0	0	0	0	0	0	1	0	0	7	0	854.534	Q80U29;Q3TAJ6;P58854	Q80U29	405	411	mKIAA0357;Tubgcp3	Gamma-tubulin complex component 3	yes	no	2	0.0072716	137.5	By matching		By MS/MS
VTQLTDR	DLGKFTEKVTQLTDRW	KVTQLTDRWQKIDKQI	K	V	T	D	R	W	0	1	0	1	0	1	0	0	0	0	1	0	0	0	0	0	2	0	0	1	0	0	7	0	831.445	E9Q557;E9PZW0	E9Q557	872	878	Dsp	Desmoplakin	yes	no	2	0.0062	107.59			By MS/MS
VVFEQTK	REAGITEKVVFEQTKV	KVVFEQTKVIADNVKD	K	V	V	T	K	V	0	0	0	0	0	1	1	0	0	0	0	1	0	1	0	0	1	0	0	2	0	0	7	0	849.46	P17751;H7BXC3	P17751	193	199	Tpi1	Triosephosphate isomerase	yes	no	2	0.0037028	120.65		By MS/MS	By matching	By MS/MS	By MS/MS
WFSQGSR	KLHNLNTKWFSQGSRP	KWFSQGSRPFIFQEVI	K	W	F	S	R	P	0	1	0	0	0	1	0	1	0	0	0	0	0	1	0	2	0	1	0	0	0	0	7	0	866.404	Q8C5B4;E9PV85;P00688	P00688	233	239	Amy2a1;Amy2	Alpha-amylase;Pancreatic alpha-amylase	no	no	2	0.0056002	110.34			By MS/MS
WGTDEEK	LFQAGELKWGTDEEKF	KWGTDEEKFITIFGTR	K	W	G	E	K	F	0	0	0	1	0	0	2	1	0	0	0	1	0	0	0	0	1	1	0	0	0	0	7	0	863.366	P48036;A0A0G2JGQ0	P48036	185	191	Anxa5	Annexin A5	yes	no	1	0.013772	101.64			By matching
YIELLTR	EAADIHARYIELLTRS	RYIELLTRSGDYYRFL	R	Y	I	T	R	S	0	1	0	0	0	0	1	0	0	1	2	0	0	0	0	0	1	0	1	0	0	0	7	0	906.517	E9Q557;E9PZW0	E9Q557	1015	1021	Dsp	Desmoplakin	yes	no	2	0.0037182	120.49	By MS/MS		By MS/MS
YNDTFWK	IKKIADEKYNDTFWKE	KYNDTFWKEFGTNIKL	K	Y	N	W	K	E	0	0	1	1	0	0	0	0	0	0	0	1	0	1	0	0	1	1	1	0	0	0	7	0	972.434	Q91V38;Q3UAD6;P08113;Q3UBU0;Q3TUD6;Q8CCY5;F7C312	Q91V38	480	486	Hsp90b1	Endoplasmin	yes	no	2	0.020761	85.272
YPNCDYK	CHLKGNSKYPNCDYKT	KYPNCDYKTTQYQKHI	K	Y	P	Y	K	T	0	0	1	1	1	0	0	0	0	0	0	1	0	0	1	0	0	0	2	0	0	0	7	0	958.385	Q8K2T2;Q8C6G3;W0UVC3;P00683	Q8K2T2	117	123	Rnase1;Rac1	Ribonuclease pancreatic	yes	no	2	0.03797	75.243	By matching		By MS/MS
YQPISYK	PSRPWWERYQPISYKI	RYQPISYKICTRSGNE	R	Y	Q	Y	K	I	0	0	0	0	0	1	0	0	0	1	0	1	0	0	1	1	0	0	2	0	0	0	7	0	897.46	Q8C5B4;E9PV85;Q61297;P00688	P00688	77	83	Amy2a1;Amy2	Alpha-amylase;Pancreatic alpha-amylase	no	no	2	0.050391	68.915		By MS/MS		By matching
AAQEEYIK	GGKKENLKAAQEEYIK	AAQEEYIKRALANSLA	K	A	A	I	K	R	2	0	0	0	0	1	2	0	0	1	0	1	0	0	0	0	0	0	1	0	0	0	8	0	950.471	Q5FWB7;A6ZI44;P05064;Q6NY00;Q9CPQ9;A6ZI46	Q5FWB7	323	330	Aldoa;Aldoart1	Fructose-bisphosphate aldolase;Fructose-bisphosphate aldolase A	yes	no	2	0.0097912	95.909					By MS/MS
ADEGISFR	AQDYGVLKADEGISFR	ADEGISFRGLFIIDDK	K	A	D	F	R	G	1	1	0	1	0	0	1	1	0	1	0	0	0	1	0	1	0	0	0	0	0	0	8	0	893.424	P35700;B1AXW5;B1AXW6;Q3U9J9	P35700	121	128	Prdx1	Peroxiredoxin-1	yes	no	2	0.018142	82.75			By MS/MS
AESGPDLR	NTLGRMTRAESGPDLR	AESGPDLRYEMTYSGG	R	A	E	L	R	Y	1	1	0	1	0	0	1	1	0	0	1	0	0	0	1	1	0	0	0	0	0	0	8	0	843.409	E9Q557;E9PZW0	E9Q557	20	27	Dsp	Desmoplakin	yes	no	2	0.01116	91.069			By MS/MS
AGLPIDVR	DFWRDPARAGLPIDVR	AGLPIDVRVPFPTIQS	R	A	G	V	R	V	1	1	0	1	0	0	0	1	0	1	1	0	0	0	1	0	0	0	0	1	0	0	8	0	839.486	Q7TPZ8	Q7TPZ8	59	66	Cpa1	Carboxypeptidase A1	yes	yes	2	0.018775	103.83			By MS/MS
ALDFIASK	HKINNVNKALDFIASK	ALDFIASKGVKLVSIG	K	A	L	S	K	G	2	0	0	1	0	0	0	0	0	1	1	1	0	1	0	1	0	0	0	0	0	0	8	0	863.475	Q1A602;Q3ULT2;Q3UDJ7;P57780;A1BN54;Q7TPR4;E9Q2W9;D3Z0L8;O88990;D3Z761;Q61063	Q1A602	115	122	Actn4;Actn1;Actn3	Alpha-actinin-4;Alpha-actinin-1;Alpha-actinin-3	yes	no	2	0.028429	74.464	By matching		By matching
AQIDNLTR	EEDTSGYRAQIDNLTR	AQIDNLTRENRSLCEE	R	A	Q	T	R	E	1	1	1	1	0	1	0	0	0	1	1	0	0	0	0	0	1	0	0	0	0	0	8	0	929.493	E9Q557	E9Q557	1405	1412	Dsp	Desmoplakin	yes	yes	2	0.035053	69.598			By MS/MS
DGLILTSR	YSESRVEKDGLILTSR	DGLILTSRGPGTSFEF	K	D	G	S	R	G	0	1	0	1	0	0	0	1	0	1	2	0	0	0	0	1	1	0	0	0	0	0	8	0	873.492	A2A813;Q99LX0	A2A813	149	156	Park7	Protein deglycase DJ-1	yes	no	2	0.0034128	111.39
DLIDFDDR	TVDNAVARDLIDFDDR	DLIDFDDRQQIYTAEK	R	D	L	D	R	Q	0	1	0	4	0	0	0	0	0	1	1	0	0	1	0	0	0	0	0	0	0	0	8	0	1007.46	E9Q557;E9PZW0	E9Q557	2088	2095	Dsp	Desmoplakin	yes	no	2	0.039551	67.897			By MS/MS
DLTDYLMK	LRLDLAGRDLTDYLMK	DLTDYLMKILTERGYS	R	D	L	M	K	I	0	0	0	2	0	0	0	0	0	0	2	1	1	0	0	0	1	0	1	0	0	0	8	0	997.479	Q3UAF7;Q3UAF6;Q3U5R4;B2RRX1;P60710;Q3UA89;Q3U939;Q3U804;Q3UGS0;Q61276;Q3TIJ9;Q3UCF8;E9Q1F2;E9Q5F4;G3UZ07;Q61272;A0A0U1RQ96;Q4KL81;P63260;Q3TSB7;Q3UD81;Q8BFZ3;Q3UBP6;Q3UBQ4;Q9QZ83	Q3UAF7	184	191	Actb;Actg1;Acta1;Actbl2	Actin, cytoplasmic 1;Actin, cytoplasmic 1, N-terminally processed;Actin, cytoplasmic 2;Actin, cytoplasmic 2, N-terminally processed;Beta-actin-like protein 2	no	no	1;2	0.0013243	174.27	By matching	By MS/MS	By MS/MS	By MS/MS	By MS/MS
DNPGVYTK	WGYGCALKDNPGVYTK	DNPGVYTKVCNYVDWI	K	D	N	T	K	V	0	0	1	1	0	0	0	1	0	0	0	1	0	0	1	0	1	0	1	1	0	0	8	0	892.429	Q9R0T7;Q9QUK9;Q3V2E0;G3UXD0;Q7M754;Q792Z1	Q9R0T7	224	231	Try4;Try5;Gm5409;Try10		no	no	2	0.023802	78.192	By MS/MS		By MS/MS
DQLLPNLR	HRLSAEERDQLLPNLR	DQLLPNLRAVGWNEVE	R	D	Q	L	R	A	0	1	1	1	0	1	0	0	0	0	3	0	0	0	1	0	0	0	0	0	0	0	8	0	967.545	P61458	P61458	14	21	Pcbd1	Pterin-4-alpha-carbinolamine dehydratase	yes	yes	2	0.0075829	97.093					By matching
DTSPNGFK	VLLAERERDTSPNGFK	DTSPNGFKNWDFMSVH	R	D	T	F	K	N	0	0	1	1	0	0	0	1	0	0	0	1	0	1	1	1	1	0	0	0	0	0	8	0	864.398	Q32MU0;P63239	Q32MU0	542	549	Pcsk1	Neuroendocrine convertase 1	yes	no	2	0.053336	78.728					By MS/MS
EAFIDWAR	STLSNESKEAFIDWAR	EAFIDWARYDDSQDHF	K	E	A	A	R	Y	2	1	0	1	0	0	1	0	0	1	0	0	0	1	0	0	0	1	0	0	0	0	8	0	1006.49	Q14DR9;Q8R2E9	Q14DR9	149	156	Ero1lb	ERO1-like protein beta	yes	no	2	0.046562	65.246			By MS/MS
EAFSLFDK	EEQIAEFKEAFSLFDK	EAFSLFDKDGDGTITT	K	E	A	D	K	D	1	0	0	1	0	0	1	0	0	0	1	1	0	2	0	1	0	0	0	0	0	0	8	0	955.465	P62204;Q3UKW2;Q9D6P8	P62204	15	22	Calm1;Calml3	Calmodulin;Calmodulin-like protein 3	yes	no	2	0.022725	79.059	By matching		By matching
EDIDTAMK	HERGDASKEDIDTAMK	EDIDTAMKLGAGYPMG	K	E	D	M	K	L	1	0	0	2	0	0	1	0	0	1	0	1	1	0	0	0	1	0	0	0	0	0	8	0	921.411	Q61425	Q61425	242	249	Hadh	Hydroxyacyl-coenzyme A dehydrogenase, mitochondrial	yes	yes	2	0.0045115	103.74					By MS/MS
EDLVYQAK	________________	EDLVYQAKLAEQAERY	R	E	D	A	K	L	1	0	0	1	0	1	1	0	0	0	1	1	0	0	0	0	0	0	1	1	0	0	8	0	964.487	Q5SS40;P62259;Q8BPH1;D6REF3	Q5SS40	5	12	Ywhae	14-3-3 protein epsilon	yes	no	2	0.0041667	106.14
EDMAALEK	EGEFSEAREDMAALEK	EDMAALEKDYEEVGVD	R	E	D	E	K	D	2	0	0	1	0	0	2	0	0	0	1	1	1	0	0	0	0	0	0	0	0	0	8	0	905.416	P05213;Q99KA2;P68369;Q52L87;Q3TIZ0;P68373;A0A0A0MQA5;P68368	P05213	423	430	Tuba1b;Tuba1a;Tuba1c;Tuba4a	Tubulin alpha-1B chain;Tubulin alpha-1A chain;Tubulin alpha-1C chain;Tubulin alpha-4A chain	no	no	2	0.033044	76.064		By matching		By MS/MS
EELDQLAK	TSEPAPDKEELDQLAK	EELDQLAKSAVTALTS	K	E	E	A	K	S	1	0	0	1	0	1	2	0	0	0	2	1	0	0	0	0	0	0	0	0	0	0	8	0	944.481	Q7TPZ8	Q7TPZ8	327	334	Cpa1	Carboxypeptidase A1	yes	yes	2	0.00198	126.52			By MS/MS
EELMEWWK	SERKEEEKEELMEWWK	EELMEWWKMMSETLNF	K	E	E	W	K	M	0	0	0	0	0	0	3	0	0	0	1	1	1	0	0	0	0	2	0	0	0	0	8	0	1149.52	Q543R4;Q00493	Q543R4	461	468	Cpe	Carboxypeptidase E	yes	no	2	0.017576	83.206	By matching		By MS/MS
EFIAWLVK	YLEGQAAKEFIAWLVK	EFIAWLVKGRGRRDFP	K	E	F	V	K	G	1	0	0	0	0	0	1	0	0	1	1	1	0	1	0	0	0	1	0	1	0	0	8	0	1004.57	P55095;A2AS86	P55095	118	125	Gcg	Glucagon;Glicentin;Glicentin-related polypeptide;Oxyntomodulin;Glucagon;Glucagon-like peptide 1;Glucagon-like peptide 1(7-37);Glucagon-like peptide 1(7-36);Glucagon-like peptide 2	yes	no	2	0.029924	73.26
EILIPVFK	QKFYWGHKEILIPVFK	EILIPVFKNMADAMKK	K	E	I	F	K	N	0	0	0	0	0	0	1	0	0	2	1	1	0	1	1	0	0	0	0	1	0	0	8	0	957.59	Q3TED3;Q3V117;Q91V92;Q3UEA1;Q8VDM8	Q3TED3	537	544	Acly	ATP-citrate synthase	yes	no	2	0.0075962	87.323					By MS/MS
EIMAEIYK	YSVSNSVKEIMAEIYK	EIMAEIYKNGPVEGAF	K	E	I	Y	K	N	1	0	0	0	0	0	2	0	0	2	0	1	1	0	0	0	0	0	1	0	0	0	8	0	995.5	Q3TVS6;Q3TC17;P10605;Q6LAF6	Q3TVS6	238	245	Ctsb	Cathepsin B;Cathepsin B light chain;Cathepsin B heavy chain	yes	no	2	0.019947	81.296			By MS/MS
EINLSHNK	FINATHLKEINLSHNK	EINLSHNKIKSQKIDY	K	E	I	N	K	I	0	0	2	0	0	0	1	0	1	1	1	1	0	0	0	1	0	0	0	0	0	0	8	0	953.493	Q501L5;O35103	Q501L5	119	126	Omd	Osteomodulin	yes	no	2	0.0030116	114.19		By MS/MS	By matching
ELAPEYSK	APWCGHCKELAPEYSK	ELAPEYSKAAALLAAE	K	E	L	S	K	A	1	0	0	0	0	0	2	0	0	0	1	1	0	0	1	1	0	0	1	0	0	0	8	0	935.46	D3Z6P0-2;D3Z6P0;F6S5U2	D3Z6P0-2	79	86	Pdia2	Protein disulfide-isomerase A2	yes	no	2	0.013384	79.474			By MS/MS
ELSDIAHR	ALTPEQKKELSDIAHR	ELSDIAHRIVAPGKGI	K	E	L	H	R	I	1	1	0	1	0	0	1	0	1	1	1	0	0	0	0	1	0	0	0	0	0	0	8	0	939.477	Q5FWB7;A6ZI44;P05064;Q6NY00;D3YWI1;Q9CPQ9;A6ZI46;A0A0U1RPN8;D3YV98;A0A0U1RPT5;D3Z510	Q5FWB7	15	22	Aldoa;Aldoart1	Fructose-bisphosphate aldolase;Fructose-bisphosphate aldolase A	yes	no	2	0.0025505	117.4					By MS/MS
ENFSCLTR	KSAPSIPKENFSCLTR	ENFSCLTRLDHNRAKS	K	E	N	T	R	L	0	1	1	0	1	0	1	0	0	0	1	0	0	1	0	1	1	0	0	0	0	0	8	0	1025.46	P14152	P14152	150	157	Mdh1	Malate dehydrogenase, cytoplasmic	yes	yes	2	0.0023051	121.09			By MS/MS		By matching
ETLITIMK	SEKEAKEKETLITIMK	ETLITIMKTLIDFVKM	K	E	T	M	K	T	0	0	0	0	0	0	1	0	0	2	1	1	1	0	0	0	2	0	0	0	0	0	8	0	947.536	P47867;P47867-2	P47867	300	307	Scg3	Secretogranin-3	yes	no	2	0.038688	68.224	By matching		By MS/MS
EVEEDEYK	PIWQRPSKEVEEDEYK	EVEEDEYKAFYKSFSK	K	E	V	Y	K	A	0	0	0	1	0	0	4	0	0	0	0	1	0	0	0	0	0	0	1	1	0	0	8	0	1039.43	Q91V38;Q3UAD6;P08113;Q3UBU0;Q3TUD6;Q8CCY5	Q91V38	349	356	Hsp90b1	Endoplasmin	yes	no	2	0.0049417	101.54					By MS/MS
EVQYLLNK	AKMMALDREVQYLLNK	EVQYLLNKAKFTKPRP	R	E	V	N	K	A	0	0	1	0	0	1	1	0	0	0	2	1	0	0	0	0	0	0	1	1	0	0	8	0	1005.55	Q9JKR6	Q9JKR6	901	908	Hyou1	Hypoxia up-regulated protein 1	yes	yes	2	0.047208	72.492
FHVEEEGK	VILLENLRFHVEEEGK	FHVEEEGKGKDASGNK	R	F	H	G	K	G	0	0	0	0	0	0	3	1	1	0	0	1	0	1	0	0	0	0	0	1	0	0	8	0	973.451	P09411;S4R2M7;P09041	P09411	124	131	Pgk1;Pgk2	Phosphoglycerate kinase 1;Phosphoglycerate kinase;Phosphoglycerate kinase 2	yes	no	2	0.0083856	95.741	By matching
FIIPQIVK	QRNVNVFKFIIPQIVK	FIIPQIVKYSPDCTII	K	F	I	V	K	Y	0	0	0	0	0	1	0	0	0	3	0	1	0	1	1	0	0	0	0	1	0	0	8	0	956.606	P16125;D3Z7F0;A0A0N4SVV8	P16125	120	127	Ldhb	L-lactate dehydrogenase B chain;L-lactate dehydrogenase	yes	no	2	0.010829	91.626		By MS/MS		By MS/MS	By MS/MS
FITIFGTR	KWGTDEEKFITIFGTR	FITIFGTRSVSHLRRV	K	F	I	T	R	S	0	1	0	0	0	0	0	1	0	2	0	0	0	2	0	0	2	0	0	0	0	0	8	0	953.533	P48036;A0A0G2JGQ0	P48036	192	199	Anxa5	Annexin A5	yes	no	2	0.0025505	117.4	By matching		By MS/MS
FLDQNLQK	SENCNKNKFLDQNLQK	FLDQNLQKYQAECSQF	K	F	L	Q	K	Y	0	0	1	1	0	2	0	0	0	0	2	1	0	1	0	0	0	0	0	0	0	0	8	0	1004.53	E9Q557;E9PZW0	E9Q557	1069	1076	Dsp	Desmoplakin	yes	no	2	0.0014008	137.18			By MS/MS
FPPEETLK	TVELSCEKFPPEETLK	FPPEETLKSYWEDNKN	K	F	P	L	K	S	0	0	0	0	0	0	2	0	0	0	1	1	0	1	2	0	1	0	0	0	0	0	8	0	959.496	Q543R4;Q00493	Q543R4	348	355	Cpe	Carboxypeptidase E	yes	no	2	0.048746	64.42			By MS/MS		By matching
FPSPEMIR	LRLENVQKFPSPEMIR	FPSPEMIRALEYIEKL	K	F	P	I	R	A	0	1	0	0	0	0	1	0	0	1	0	0	1	1	2	1	0	0	0	0	0	0	8	0	975.485	Q03517;Q4W8U9	Q03517	50	57	Scg2	Secretogranin-2;Secretoneurin;Manserin	yes	no	2	0.0017979	129.56			By MS/MS
FSVSPVVR	AHNMRVMKFSVSPVVR	FSVSPVVRVAVEAKNP	K	F	S	V	R	V	0	1	0	0	0	0	0	0	0	0	0	0	0	1	1	2	0	0	0	3	0	0	8	0	889.502	Q8C153;Q3UZ14;Q3UMI7;Q3UDC8;Q3TX47;Q3TWX1;Q3TLB1;Q3TJZ1;P58252;Q6P9L9;Q8BMA8;Q3TW58;Q3UBL9;Q3TK17;Q3TSK4;Q3TPG2	Q8C153	499	506	Eef2	Elongation factor 2	yes	no	2	0.0035682	110.31
GAWSNVLR	EGSKAFFKGAWSNVLR	GAWSNVLRGMGGAFVL	K	G	A	L	R	G	1	1	1	0	0	0	0	1	0	0	1	0	0	0	0	1	0	1	0	1	0	0	8	0	901.477	Q545A2;P51881;Q8BVI9;P48962	Q545A2	273	280	Slc25a5;Slc25a4	ADP/ATP translocase 2;ADP/ATP translocase 2, N-terminally processed;ADP/ATP translocase 1	yes	no	2	0.002926	114.78			By matching
GLFIIDDK	ADEGISFRGLFIIDDK	GLFIIDDKGILRQITI	R	G	L	D	K	G	0	0	0	2	0	0	0	1	0	2	1	1	0	1	0	0	0	0	0	0	0	0	8	0	919.501	P35700;B1AXW5;B1AXW6;Q3U9J9;B1AZS9;O08807	P35700	129	136	Prdx1;Prdx4	Peroxiredoxin-1;Peroxiredoxin-4	no	no	2	0.010894	91.516	By matching		By MS/MS
GLVGEIIK	IKPDGVQRGLVGEIIK	GLVGEIIKRFEQKGFR	R	G	L	I	K	R	0	0	0	0	0	0	1	2	0	2	1	1	0	0	0	0	0	0	0	1	0	0	8	0	827.512	Q5NC82;E9PZF0;Q01768;B0LAA8;Q8R4B4;Q5NC80;Q5NC79	Q5NC82	19	26	Nme2;Gm20390;Nme1	Nucleoside diphosphate kinase;Nucleoside diphosphate kinase B	no	no	2	0.013698	86.794			By MS/MS		By MS/MS
GLVGIEFK	PVEEAYKRGLVGIEFK	GLVGIEFKEKLLSAER	R	G	L	F	K	E	0	0	0	0	0	0	1	2	0	1	1	1	0	1	0	0	0	0	0	1	0	0	8	0	861.496	E9Q557;E9PZW0	E9Q557	2331	2338	Dsp	Desmoplakin	yes	no	2	0.0050692	101.33	By MS/MS		By MS/MS
GTLDPVEK	ELNADLFRGTLDPVEK	GTLDPVEKALRDAKLD	R	G	T	E	K	A	0	0	0	1	0	0	1	1	0	0	1	1	0	0	1	0	1	0	0	1	0	0	8	0	857.449	Q3UBA6;Q3TZJ3;Q3TH56;Q3TEK2;P63017;Q504P4;Q3U9L2;Q3TF16;Q3TQ13;Q3UDS0;Q3ULM1;Q3TRH3;Q3TB63;Q3KQJ4;Q3TH04;Q3UXU1	Q3UBA6	312	319	Hspa8	Heat shock cognate 71 kDa protein	yes	no	2	0.031871	71.692			By matching		By MS/MS
GVAPLWMR	EGLNAFYKGVAPLWMR	GVAPLWMRQIPYTMMK	K	G	V	M	R	Q	1	1	0	0	0	0	0	1	0	0	1	0	1	0	1	0	0	1	0	1	0	0	8	0	928.495	Q3UB63;Q3U995;Q3THU8;G5E902;Q8VEM8	Q3UB63	214	221	Slc25a3	Phosphate carrier protein, mitochondrial	yes	no	2	0.026121	101.69
HLNLSGNK	AEKCPNLKHLNLSGNK	HLNLSGNKIKDLSTIE	K	H	L	N	K	I	0	0	2	0	0	0	0	1	1	0	2	1	0	0	0	1	0	0	0	0	0	0	8	0	881.472	F6UFG6;D3YYE1;D3Z7M9;Q64G17;O35381	F6UFG6	88	95	Anp32a;Anp32c	Putative acidic leucine-rich nuclear phosphoprotein 32 family member C;Acidic leucine-rich nuclear phosphoprotein 32 family member A	yes	no	2	0.0039138	107.9			By matching
IDGSLDFK	GWTVLQKRIDGSLDFK	IDGSLDFKKNWIQYKE	R	I	D	F	K	K	0	0	0	2	0	0	0	1	0	1	1	1	0	1	0	1	0	0	0	0	0	0	8	0	893.449	Q3UEM7;Q3UER8;Q8VCM7	Q3UEM7	223	230	Fgg	Fibrinogen gamma chain	yes	no	2	0.0037404	109.11
IEEELGSK	AKYNQILRIEEELGSK	IEEELGSKAKFAGRSF	R	I	E	S	K	A	0	0	0	0	0	0	3	1	0	1	1	1	0	0	0	1	0	0	0	0	0	0	8	0	903.455	Q5FW97;P17182;Q6PHC1	Q5FW97	413	420	EG433182;Eno1	Alpha-enolase	yes	no	2	0.0097357	106.93	By MS/MS		By MS/MS
IENHEGVR	KNIKIISKIENHEGVR	IENHEGVRRFDEILEA	K	I	E	V	R	R	0	1	1	0	0	0	2	1	1	1	0	0	0	0	0	0	0	0	0	1	0	0	8	0	952.473	P52480;P52480-2	P52480	271	278	Pkm	Pyruvate kinase PKM	no	no	2	0.032259	71.379			By matching
IIAPPERK	APSTMKIKIIAPPERK	IIAPPERKYSVWIGGS	K	I	I	R	K	Y	1	1	0	0	0	0	1	0	0	2	0	1	0	0	2	0	0	0	0	0	0	0	8	1	922.56	Q3UAF7;Q3UAF6;Q3U5R4;B2RRX1;P60710;Q3UAA9;Q3UA89;Q3U939;Q3U804;Q3UGS0;Q61276;Q3TIJ9;Q3UCF8;E9Q1F2;Q61272;Q99NC5;Q4KL81;P63260;Q3TSB7;B1ATY1;Q8BFZ3;Q3UBP6;Q3UBQ4;Q9QZ83	Q3UAF7	329	336	Actb;Acta1;Actg1;Actbl2	Actin, cytoplasmic 1;Actin, cytoplasmic 1, N-terminally processed;Actin, cytoplasmic 2;Actin, cytoplasmic 2, N-terminally processed;Beta-actin-like protein 2	no	no	2	0.019655	98.523		By MS/MS
IISSIEQK	GARRASWRIISSIEQK	IISSIEQKEENKGGED	R	I	I	Q	K	E	0	0	0	0	0	1	1	0	0	3	0	1	0	0	0	2	0	0	0	0	0	0	8	0	916.523	Q5SS40;P62259;Q8BPH1;D6REF3;F6WA09	Q5SS40	62	69	Ywhae	14-3-3 protein epsilon	yes	no	2	0.0018037	129.47			By MS/MS		By MS/MS
ILEFFGLK	SDHTDNQRILEFFGLK	ILEFFGLKKEECPAVR	R	I	L	L	K	K	0	0	0	0	0	0	1	1	0	1	2	1	0	2	0	0	0	0	0	0	0	0	8	0	965.559	Q3UDR2;Q3URP6;Q3U738;Q3TWE3;Q3TIM0;Q3THC3;Q3TF72;P09103;Q3TGS0;Q3UBY9;Q3UJA8;Q3UA23;Q3TT76	Q3UDR2	303	310	P4hb	Protein disulfide-isomerase	yes	no	2	0.015886	84.568	By matching	By MS/MS	By MS/MS		By MS/MS
IPAETLNR	PTNEAFEKIPAETLNR	IPAETLNRILGDPEAL	K	I	P	N	R	I	1	1	1	0	0	0	1	0	0	1	1	0	0	0	1	0	1	0	0	0	0	0	8	0	912.503	Q19PV3;Q3TDZ5;Q3TAY9;Q3UXJ2;Q3UBG4;A1L354;A1L353;P82198	Q19PV3	31	38	Tgfbi	Transforming growth factor-beta-induced protein ig-h3	yes	no	2	0.002552	117.39		By MS/MS		By MS/MS	By MS/MS
ISCTIANR	CIGAGRGRISCTIANR	ISCTIANRCHEGGQSY	R	I	S	N	R	C	1	1	1	0	1	0	0	0	0	2	0	0	0	0	0	1	1	0	0	0	0	0	8	0	933.47	B7ZNJ1;Q3UH17;A0A087WS56;B9EHT6;A0A087WSN6;Q3UHL6;Q3UGY5;A0A087WR50;P11276;Q3TBB4;Q3TCL7;Q4KL80	B7ZNJ1	134	141	Fn1	Fibronectin;Anastellin	yes	no	2	0.00074401	134.3				By MS/MS
IVEMSTSK	VLKGRPCKIVEMSTSK	IVEMSTSKTGKHGHAK	K	I	V	S	K	T	0	0	0	0	0	0	1	0	0	1	0	1	1	0	0	2	1	0	0	1	0	0	8	0	893.453	A0A0A0MQM0;P63242;Q8BGY2;Q8VHU9	A0A0A0MQM0	40	47	Eif5a;Eif5a2	Eukaryotic translation initiation factor 5A;Eukaryotic translation initiation factor 5A-1;Eukaryotic translation initiation factor 5A-2	no	no	2	0.039551	67.897		By MS/MS
IVGGYTCR	FPVDDDDKIVGGYTCR	IVGGYTCRENSVPYQV	K	I	V	C	R	E	0	1	0	0	1	0	0	2	0	1	0	0	0	0	0	0	1	0	1	1	0	0	8	0	924.449	Q9R0T7;Q9QUK9;Q3V2E0;Q7M754;Q792Y9;Q9Z1R9;Q792Z1;Q792Y6;P07146	Q9R0T7	24	31	Try4;Try5;Gm5409;Gm5771;Prss1;Try10;Prss2	Anionic trypsin-2	no	no	2	0.0025505	117.4	By MS/MS		By MS/MS
KLSNELLK	NEYETLWRKLSNELLK	KLSNELLKFFSQ____	R	K	L	L	K	F	0	0	1	0	0	0	1	0	0	0	3	2	0	0	0	1	0	0	0	0	0	0	8	1	943.57	A0A0J9YUH8	A0A0J9YUH8	62	69			yes	yes	2	0.002636	125.31	By MS/MS	By MS/MS	By MS/MS	By MS/MS	By MS/MS
LADISLGK	TLGPKFKKLADISLGK	LADISLGKEIDSYPDP	K	L	A	G	K	E	1	0	0	1	0	0	0	1	0	1	2	1	0	0	0	1	0	0	0	0	0	0	8	0	815.475	B2RQH0;Q61495;Q7TSF1;Q7TSF0;Q9CUH7	B2RQH0	779	786	Dsg1b;Dsg1a;Dsg1c	Desmoglein-1-alpha;Desmoglein-1-beta;Desmoglein-1-gamma	yes	no	2	0.054773	68.224
LDVGTIEK	HSNEFDAKLDVGTIEK	LDVGTIEKVKFLWNNH	K	L	D	E	K	V	0	0	0	1	0	0	1	1	0	1	1	1	0	0	0	0	1	0	0	1	0	0	8	0	873.481	Q5BKQ4	Q5BKQ4	408	415	Pnliprp1	Inactive pancreatic lipase-related protein 1	yes	yes	2	0.0032665	112.41			By MS/MS
LEGSGLQR	TLTNVVFRLEGSGLQR	LEGSGLQRPKVLNVGD	R	L	E	Q	R	P	0	1	0	0	0	1	1	2	0	0	2	0	0	0	0	1	0	0	0	0	0	0	8	0	858.456	A0A0R4J293;Q9JLF6	A0A0R4J293	727	734	Tgm1	Protein-glutamine gamma-glutamyltransferase K	yes	no	2	0.035053	69.598			By MS/MS
LFPAPPEK	NTTDSKSKLFPAPPEK	LFPAPPEKSQEETDST	K	L	F	E	K	S	1	0	0	0	0	0	1	0	0	0	1	1	0	1	3	0	0	0	0	0	0	0	8	0	897.496	P47867	P47867	357	364	Scg3	Secretogranin-3	yes	yes	2	0.04364	66.351			By MS/MS		By matching
LIINSLYK	AEVNRMMKLIINSLYK	LIINSLYKNKEIFLRE	K	L	I	Y	K	N	0	0	1	0	0	0	0	0	0	2	2	1	0	0	0	1	0	0	1	0	0	0	8	0	962.58	Q91V38;Q3UAD6;P08113;Q3UBU0;Q8C2R2	Q91V38	88	95	Hsp90b1	Endoplasmin	yes	no	2	0.019947	81.296
LLAPGNYK	AKDGDYWRLLAPGNYK	LLAPGNYKLTASAPGY	R	L	L	Y	K	L	1	0	1	0	0	0	0	1	0	0	2	1	0	0	1	0	0	0	1	0	0	0	8	0	874.491	Q543R4;Q00493	Q543R4	413	420	Cpe	Carboxypeptidase E	yes	no	2	0.0039978	107.32	By MS/MS	By matching		By MS/MS	By MS/MS
LLFEELVR	AEAAMFHRLLFEELVR	LLFEELVRASSHSTDL	R	L	L	V	R	A	0	1	0	0	0	0	2	0	0	0	3	0	0	1	0	0	0	0	0	1	0	0	8	0	1017.59	P52480-2	P52480-2	393	400	Pkm	Pyruvate kinase PKM	yes	yes	2	0.0022063	122.74
LLIEMEQR	QMVVDGVKLLIEMEQR	LLIEMEQRLEQGQAID	K	L	L	Q	R	L	0	1	0	0	0	1	2	0	0	1	2	0	1	0	0	0	0	0	0	0	0	0	8	0	1030.55	Q04447	Q04447	359	366	Ckb	Creatine kinase B-type	yes	yes	2	0.0097587	93.429			By matching
LLPWSPEK	GTAIRPLKLLPWSPEK	LLPWSPEKINTRFLLY	K	L	L	E	K	I	0	0	0	0	0	0	1	0	0	0	2	1	0	0	2	1	0	1	0	0	0	0	8	0	968.533	Q5BKQ4	Q5BKQ4	44	51	Pnliprp1	Inactive pancreatic lipase-related protein 1	yes	yes	2	0.02593	76.478			By MS/MS
LLVGVDEK	DVDAKAQKLLVGVDEK	LLVGVDEKLNTGDIKR	K	L	L	E	K	L	0	0	0	1	0	0	1	1	0	0	2	1	0	0	0	0	0	0	0	2	0	0	8	0	871.501	Q3TED3;Q3V117;Q91V92;Q3UEA1;Q3TS02	Q3TED3	152	159	Acly	ATP-citrate synthase	yes	no	2	0.0044113	104.44			By matching		By MS/MS
LLVVTDPR	QAAFREPRLLVVTDPR	LLVVTDPRADHQPLTE	R	L	L	P	R	A	0	1	0	1	0	0	0	0	0	0	2	0	0	0	1	0	1	0	0	2	0	0	8	0	911.544	B2CY77;P14206	B2CY77	121	128	Rpsa	40S ribosomal protein SA	yes	no	2	0.032108	71.501			By MS/MS
LNFAVASR	KFLDAGHKLNFAVASR	LNFAVASRKTFSHELS	K	L	N	S	R	K	2	1	1	0	0	0	0	0	0	0	1	0	0	1	0	1	0	0	0	1	0	0	8	0	876.482	P27773	P27773	297	304	Pdia3	Protein disulfide-isomerase A3	yes	yes	2	0.0045574	103.42			By matching
LPEGDLGK	GEVREDLRLPEGDLGK	LPEGDLGKEIEQKYDC	R	L	P	G	K	E	0	0	0	1	0	0	1	2	0	0	2	1	0	0	1	0	0	0	0	0	0	0	8	0	827.439	A0A0A0MQM0;P63242;J3QPS8	A0A0A0MQM0	114	121	Eif5a	Eukaryotic translation initiation factor 5A;Eukaryotic translation initiation factor 5A-1	yes	no	2	0.031871	71.692			By matching		By matching
LPLQDVYK	RPTDKPLRLPLQDVYK	LPLQDVYKIGGIGTVP	R	L	P	Y	K	I	0	0	0	1	0	1	0	0	0	0	2	1	0	0	1	0	0	0	1	1	0	0	8	0	974.544	Q58E64;Q3UA81;P10126;Q3TII3;Q3UZQ3;P62631	Q58E64	248	255	Eef1a1;Eef1a2	Elongation factor 1-alpha;Elongation factor 1-alpha 1;Elongation factor 1-alpha 2	yes	no	2	0.012177	89.355			By MS/MS
LPVEEAYK	VDPVSNLRLPVEEAYK	LPVEEAYKRGLVGIEF	R	L	P	Y	K	R	1	0	0	0	0	0	2	0	0	0	1	1	0	0	1	0	0	0	1	1	0	0	8	0	947.496	E9Q557;E9PZW0	E9Q557	2322	2329	Dsp	Desmoplakin	yes	no	2	0.034454	69.825			By MS/MS
LQLLNLSR	ALFHNLSRLQLLNLSR	LQLLNLSRNQLTTLPG	R	L	Q	S	R	N	0	1	1	0	0	1	0	0	0	0	4	0	0	0	0	1	0	0	0	0	0	0	8	0	955.581	Q642I5;Q9DBB9	Q642I5	229	236	Cpn2	Carboxypeptidase N subunit 2	yes	no	2	0.0030675	147.04	By MS/MS	By matching	By MS/MS	By matching	By matching
LTPEEIER	TITNDQNRLTPEEIER	LTPEEIERMVNDAEKF	R	L	T	E	R	M	0	1	0	0	0	0	3	0	0	1	1	0	0	0	1	0	1	0	0	0	0	0	8	0	985.508	Q3U9G2;Q3TWF2;P20029;Q9DC41;Q3TKF8;Q3TI47;Q3U7T8;Q3U6V3	Q3U9G2	534	541	Hspa5	78 kDa glucose-regulated protein	yes	no	2	0.0022198	122.52	By MS/MS		By MS/MS		By matching
LVLCEVFK	PFRKDPNKLVLCEVFK	LVLCEVFKYNRKPAET	K	L	V	F	K	Y	0	0	0	0	1	0	1	0	0	0	2	1	0	1	0	0	0	0	0	2	0	0	8	0	1006.55	P15105;D3Z121;D3YVK1;V9GZG5;V9GZP0	P15105	96	103	Glul	Glutamine synthetase	yes	no	2	0.04364	66.351
LYDAYELK	VAMMKPSRLYDAYELK	LYDAYELKHALKGAGT	R	L	Y	L	K	H	1	0	0	1	0	0	1	0	0	0	2	1	0	0	0	0	0	0	2	0	0	0	8	0	1013.51	P48036	P48036	88	95	Anxa5	Annexin A5	yes	yes	2	0.0037932	108.74					By MS/MS
LYEQLSGK	EWDDYVPKLYEQLSGK	LYEQLSGK________	K	L	Y	G	K	-	0	0	0	0	0	1	1	1	0	0	2	1	0	0	0	1	0	0	1	0	0	0	8	0	936.492	Q5EBQ2;Q3TGC5;P70296;D3Z1V4	Q5EBQ2	180	187	Pebp1	Phosphatidylethanolamine-binding protein 1;Hippocampal cholinergic neurostimulating peptide	yes	no	2	0.0020523	125.31			By matching
MDELQLFR	VVSLSQPKMDELQLFR	MDELQLFRGDTVLLKG	K	M	D	F	R	G	0	1	0	1	0	1	1	0	0	0	2	0	1	1	0	0	0	0	0	0	0	0	8	0	1050.52	Q01853	Q01853	46	53	Vcp	Transitional endoplasmic reticulum ATPase	yes	yes	2	0.0045668	103.35
NIELAVMR	EVVQSGGKNIELAVMR	NIELAVMRRDQPLKIL	K	N	I	M	R	R	1	1	1	0	0	0	1	0	0	1	1	0	1	0	0	0	0	0	0	1	0	0	8	0	944.511	Q542H2;Q3UIT9;Q3TN31;Q9Z2U0;Q3THL2	Q542H2	205	212	Psma7	Proteasome subunit alpha type;Proteasome subunit alpha type-7	yes	no	2	0.020708	80.684
NLLSVAYK	VELTVEERNLLSVAYK	NLLSVAYKNVIGARRA	R	N	L	Y	K	N	1	0	1	0	0	0	0	0	0	0	2	1	0	0	0	1	0	0	1	1	0	0	8	0	906.517	P63101;D3YXN6;Q8BWN0;Q5SS40;P62259;Q8BPH1;D6REF3;F6WA09;A8IP69;P61982;A3KML3;F6YY69;F6VW30;P68254-2;P68254;Q9JJ20;O70456;P68510;A2A5N2;Q9CQV8-2;Q9CQV8;A2A5N1	Q5SS40	43	50	Ywhaz;Ywhae;Ywhag;Ywhaq;Sfn;Ywhah;Ywhab	14-3-3 protein zeta/delta;14-3-3 protein epsilon;14-3-3 protein gamma;14-3-3 protein gamma, N-terminally processed;14-3-3 protein theta;14-3-3 protein sigma;14-3-3 protein eta;14-3-3 protein beta/alpha;14-3-3 protein beta/alpha, N-terminally processed	no	no	2	0.011012	91.318	By MS/MS		By MS/MS
QAFPNTNR	QVLEPSFRQAFPNTNR	QAFPNTNRWFLTCINQ	R	Q	A	N	R	W	1	1	2	0	0	1	0	0	0	0	0	0	0	1	1	0	1	0	0	0	0	0	8	0	946.462	Q4FZK2;Q9D8N0;Q8R1N8	Q4FZK2	182	189	Eef1g	Elongation factor 1-gamma	yes	no	2	0.033559	70.332
QASEGPLK	DDIKKVVKQASEGPLK	QASEGPLKGILGYTED	K	Q	A	L	K	G	1	0	0	0	0	1	1	1	0	0	1	1	0	0	1	1	0	0	0	0	0	0	8	0	828.434	S4R257;D2KHZ9;A0A0A0MQF6;P16858;S4R1W1;Q3TUZ9;W8QM43;Q4VBD1;V9GXK0;V9GX06	S4R257	219	226	Gapdh;GAPDH;Gm3839;Gm10481;Gm12117;Gm11214	Glyceraldehyde-3-phosphate dehydrogenase	yes	no	2	0.021351	80.165			By matching
QEIAQEFK	TSRSNAQRQEIAQEFK	QEIAQEFKTLFGRDLV	R	Q	E	F	K	T	1	0	0	0	0	2	2	0	0	1	0	1	0	1	0	0	0	0	0	0	0	0	8	0	991.497	P48036;A0A0G2JGQ0	P48036	49	56	Anxa5	Annexin A5	yes	no	2	0.00039175	138.06			By MS/MS
QLAPIWDK	APWCGHCKQLAPIWDK	QLAPIWDKLGETYKDH	K	Q	L	D	K	L	1	0	0	1	0	1	0	0	0	1	1	1	0	0	1	0	0	1	0	0	0	0	8	0	969.528	Q3UDR2;Q3URP6;Q3U738;Q3TWE3;Q3TIM0;Q3THC3;Q3TF72;P09103;Q3UBY9;Q3UJA8;Q3UA23;Q3TIQ5;E9Q8G8	Q3UDR2	404	411	P4hb	Protein disulfide-isomerase	yes	no	2	0.0026979	116.37	By MS/MS	By matching	By MS/MS		By MS/MS
QLFDQVVK	IQPNTTGKQLFDQVVK	QLFDQVVKTVGLREVW	K	Q	L	V	K	T	0	0	0	1	0	2	0	0	0	0	1	1	0	1	0	0	0	0	0	2	0	0	8	0	975.539	Q8C2N4;Q7TSG6;Q05CE6;Q05DU4;Q3TZQ2;Q4KML7;Q3UXR4;Q3UL48;Q3TCP5;Q3UJJ8;Q3TH46;Q3U111;P26041;P26043;P26040	Q8C2N4	28	35	Rdx;Msn;Ezr	Moesin;Radixin;Ezrin	yes	no	2	0.02593	76.478			By MS/MS
QLIVGVNK	LAYTLGVKQLIVGVNK	QLIVGVNKMDSTEPPY	K	Q	L	N	K	M	0	0	1	0	0	1	0	1	0	1	1	1	0	0	0	0	0	0	0	2	0	0	8	0	869.533	Q58E64;Q3UA81;P10126;Q3TII3;Q3UZQ3;D3YZ68;P62631;D3Z3I8	Q58E64	147	154	Eef1a1;Eef1a2	Elongation factor 1-alpha;Elongation factor 1-alpha 1;Elongation factor 1-alpha 2	yes	no	2	0.0041667	106.14
QSLEEAAK	SEDNARHKQSLEEAAK	QSLEEAAKTIQDKNKE	K	Q	S	A	K	T	2	0	0	0	0	1	2	0	0	0	1	1	0	0	0	1	0	0	0	0	0	0	8	0	874.44	E9Q557	E9Q557	1323	1330	Dsp	Desmoplakin	yes	yes	2	0.032958	70.816			By MS/MS
QVQNLVNK	EKIIEYKRQVQNLVNK	QVQNLVNKSKKIVQLK	R	Q	V	N	K	S	0	0	2	0	0	2	0	0	0	0	1	1	0	0	0	0	0	0	0	2	0	0	8	0	941.529	E9Q557;E9PZW0	E9Q557	446	453	Dsp	Desmoplakin	yes	no	2	0.00050514	152.47	By MS/MS		By MS/MS
SCNCLLLK	IAKAASEKSCNCLLLK	SCNCLLLKVNQIGSVT	K	S	C	L	K	V	0	0	1	0	2	0	0	0	0	0	3	1	0	0	0	1	0	0	0	0	0	0	8	0	1006.49	Q5FW97;P17182;Q6PHC1	Q5FW97	336	343	EG433182;Eno1	Alpha-enolase	yes	no	2	0.013196	87.639			By matching	By matching	By matching
SDPVVSYR	HACIPIKKSDPVVSYR	SDPVVSYRETVSEESN	K	S	D	Y	R	E	0	1	0	1	0	0	0	0	0	0	0	0	0	0	1	2	0	0	1	2	0	0	8	0	921.456	Q8C153;Q3UZ14;Q3UMI7;Q3UDC8;Q3TX47;Q3TWX1;Q3TLB1;Q3TJZ1;P58252;Q6P9L9;Q8BMA8;Q3TW58;Q3UBL9;Q3TK17;Q3TSK4;Q3TPG2;Q99LT6	Q8C153	573	580	Eef2	Elongation factor 2	yes	no	2	0.004001	107.29		By matching	By matching
SGNEDEFR	ISYKICTRSGNEDEFR	SGNEDEFRDMVTRCNN	R	S	G	F	R	D	0	1	1	1	0	0	2	1	0	0	0	0	0	1	0	1	0	0	0	0	0	0	8	0	952.389	Q8C5B4;E9PV85;Q61297;P00688	P00688	88	95	Amy2a1;Amy2	Alpha-amylase;Pancreatic alpha-amylase	no	no	1;2	0.0008144	168.27	By MS/MS		By MS/MS
SINNPDMR	MGIGHRVKSINNPDMR	SINNPDMRVQILKDFV	K	S	I	M	R	V	0	1	2	1	0	0	0	0	0	1	0	0	1	0	1	1	0	0	0	0	0	0	8	0	945.434	Q3TED3;Q3V117;Q91V92;Q3UEA1;Q8VDM8;Q3UVY4;Q99K05	Q3TED3	969	976	Acly	ATP-citrate synthase	yes	no	2	0.0037404	109.11			By matching		By MS/MS
SLAAATGK	RLRQFLQKSLAAATGK	SLAAATGKQELAKYFL	K	S	L	G	K	Q	3	0	0	0	0	0	0	1	0	0	1	1	0	0	0	1	1	0	0	0	0	0	8	0	717.402	Q545V6;P60041	Q545V6	38	45	Sst	Somatostatin;Antrin;Somatostatin-28;Somatostatin-14	yes	no	2	0.030053	73.157	By matching		By matching
SLMDEVVK	EAFARGTKSLMDEVVK	SLMDEVVKATSRGCIT	K	S	L	V	K	A	0	0	0	1	0	0	1	0	0	0	1	1	1	0	0	1	0	0	0	2	0	0	8	0	919.468	P09411	P09411	354	361	Pgk1	Phosphoglycerate kinase 1	yes	yes	2	0.039551	67.897
SNKPIILR	KPRNPDYRSNKPIILR	SNKPIILRALCDYKQD	R	S	N	L	R	A	0	1	1	0	0	0	0	0	0	2	1	1	0	0	1	1	0	0	0	0	0	0	8	1	939.587	E9Q557;E9PZW0	E9Q557	469	476	Dsp	Desmoplakin	yes	no	2	0.0094623	129.65			By MS/MS
TASFSESR	TSTPAPGRTASFSESR	TASFSESRADEVAPAK	R	T	A	S	R	A	1	1	0	0	0	0	1	0	0	0	0	0	0	1	0	3	1	0	0	0	0	0	8	0	883.404	Q3TED3;Q3V117;Q91V92;Q3UEA1;Q3TS02	Q3TED3	453	460	Acly	ATP-citrate synthase	yes	no	2	0.0173	83.429
TAVAPIER	GVAAAISKTAVAPIER	TAVAPIERVKLLLQVQ	K	T	A	E	R	V	2	1	0	0	0	0	1	0	0	1	0	0	0	0	1	0	1	0	0	1	0	0	8	0	855.481	Q545A2;P51881;Q8BVI9;P48962;B2RTC8;Q3V132	Q545A2	24	31	Slc25a5;Slc25a4;Slc25a31	ADP/ATP translocase 2;ADP/ATP translocase 2, N-terminally processed;ADP/ATP translocase 1;ADP/ATP translocase 4;ADP/ATP translocase 4, N-terminally processed	yes	no	2	0.035193	98.582
TDDEVVQR	GKSREGSRTDDEVVQR	TDDEVVQREEEAIQLD	R	T	D	Q	R	E	0	1	0	2	0	1	1	0	0	0	0	0	0	0	0	0	1	0	0	2	0	0	8	0	960.451	Q91V38;Q3UAD6;P08113;Q3UBU0	Q91V38	44	51	Hsp90b1	Endoplasmin	yes	no	2	0.0010306	153.78			By MS/MS
TILSLMTR	QQTYDYAKTILSLMTR	TILSLMTREKHPEGKI	K	T	I	T	R	E	0	1	0	0	0	0	0	0	0	1	2	0	1	0	0	1	2	0	0	0	0	0	8	0	933.532	Q3TED3;Q3V117;Q91V92;Q3UEA1;Q3TS02	Q3TED3	322	329	Acly	ATP-citrate synthase	yes	no	2	0.011438	90.601			By matching
TKFENLCK	KKKQEEKKTKFENLCK	TKFENLCKIMKDILEK	K	T	K	C	K	I	0	0	1	0	1	0	1	0	0	0	1	2	0	1	0	0	1	0	0	0	0	0	8	1	1038.52	Q80Y52;Q3UIF3;Q3TKA2;P07901;Q3TJU7	Q80Y52	567	574	Hsp90aa1	Heat shock protein HSP 90-alpha	yes	no	1	0.043277	49.097	By matching	By matching		By matching	By matching
TMNNFLDR	NRKTGEIRTMNNFLDR	TMNNFLDREQYSQYSL	R	T	M	D	R	E	0	1	2	1	0	0	0	0	0	0	1	0	1	1	0	0	1	0	0	0	0	0	8	0	1009.47	B2RQH0;Q61495;Q7TSF1;Q7TSF0;Q7TSF0-2	B2RQH0	220	227	Dsg1b;Dsg1a;Dsg1c	Desmoglein-1-alpha;Desmoglein-1-beta;Desmoglein-1-gamma	yes	no	2	0.016656	83.948			By MS/MS
TQEEIVAK	AVDYDGSRTQEEIVAK	TQEEIVAKVREVSQPD	R	T	Q	A	K	V	1	0	0	0	0	1	2	0	0	1	0	1	0	0	0	0	1	0	0	1	0	0	8	0	916.487	A0A0R4J0Z1;P08003	A0A0R4J0Z1	152	159	Pdia4	Protein disulfide-isomerase A4	yes	no	2	0.020717	80.676					By MS/MS
VCNPIITK	HQQKELEKVCNPIITK	VCNPIITKLYQSAGGM	K	V	C	T	K	L	0	0	1	0	1	0	0	0	0	2	0	1	0	0	1	0	1	0	0	1	0	0	8	0	943.516	Q3UBA6;Q3TZJ3;Q3TH56;Q3TEK2;P63017;Q504P4;Q3U9L2;Q3TF16;Q3TQ13;Q3ULM1;Q3TRH3;Q3KQJ4;Q3TH04;Q3UXU1;Q3UBR0	Q3UBA6	602	609	Hspa8	Heat shock cognate 71 kDa protein	yes	no	2	0.011373	90.709			By matching		By matching
VFLENVIR	EETRGVLKVFLENVIR	VFLENVIRDAVTYTEH	K	V	F	I	R	D	0	1	1	0	0	0	1	0	0	1	1	0	0	1	0	0	0	0	0	2	0	0	8	0	988.571	B2RTM0;P62806;Q61667;Q6B822	B2RTM0	61	68	Hist2h4;Hist1h4a	Histone H4	yes	no	2	0.00093548	151.29	By MS/MS		By MS/MS
VHSFPTLK	ANEVEAVKVHSFPTLK	VHSFPTLKFFPASADR	K	V	H	L	K	F	0	0	0	0	0	0	0	0	1	0	1	1	0	1	1	1	1	0	0	1	0	0	8	0	927.518	Q3UDR2;Q3URP6;Q3U738;Q3TWE3;Q3TIM0;Q3THC3;Q3TF72;P09103;Q3TGS0;Q3UBY9;Q3UJA8;Q3UA23;Q3TIQ5;E9Q8G8	Q3UDR2	439	446	P4hb	Protein disulfide-isomerase	yes	no	2	0.0013719	137.84			By MS/MS
VIPELNGK	GAAKAVGKVIPELNGK	VIPELNGKLTGMAFRV	K	V	I	G	K	L	0	0	1	0	0	0	1	1	0	1	1	1	0	0	1	0	0	0	0	1	0	0	8	0	868.502	S4R257;D2KHZ9;A0A0A0MQF6;P16858;S4R1W1;Q3TUZ9;D3YYI5;Q8CEV2;Q8BJ40	S4R257	175	182	Gapdh;GAPDH;Gm3839;Gm10481;Gm7293;3000002C10Rik;Gm6498	Glyceraldehyde-3-phosphate dehydrogenase	yes	no	2	0.0021495	123.69	By MS/MS		By MS/MS
VLEDSDLK	STMKPVQKVLEDSDLK	VLEDSDLKKSDIDEIV	K	V	L	L	K	K	0	0	0	2	0	0	1	0	0	0	2	1	0	0	0	1	0	0	0	1	0	0	8	0	917.471	Q3U9G2;Q3TWF2;P20029;Q3TKF8;Q3TI47;Q3U7T8;Q3U6V3;Q3UEM8;Q3TUS2	Q3U9G2	346	353	Hspa5	78 kDa glucose-regulated protein	yes	no	2	0.0083418	95.815			By MS/MS		By MS/MS
VLSSIEQK	VGQRAAWRVLSSIEQK	VLSSIEQKSNEEGSEE	R	V	L	Q	K	S	0	0	0	0	0	1	1	0	0	1	1	1	0	0	0	2	0	0	0	1	0	0	8	0	902.507	Q9JJ20;O70456	Q9JJ20	61	68	Sfn	14-3-3 protein sigma	yes	no	2	0.0024457	118.74			By MS/MS
VNVVEQEK	APALVSKKVNVVEQEK	VNVVEQEKIDKLMIEM	K	V	N	E	K	I	0	0	1	0	0	1	2	0	0	0	0	1	0	0	0	0	0	0	0	3	0	0	8	0	943.497	Q5FW97;P17182;Q6PHC1;Q8CF78;B0QZL1;B1ARR7	Q5FW97	82	89	EG433182;Eno1	Alpha-enolase;Enolase	yes	no	2	0.0098547	93.267			By MS/MS		By matching
VQEQELTR	TEAMSKLKVQEQELTR	VQEQELTRLRIDYERV	K	V	Q	T	R	L	0	1	0	0	0	2	2	0	0	0	1	0	0	0	0	0	1	0	0	1	0	0	8	0	1001.51	E9Q557;Q9CV95	E9Q557	1542	1549	Dsp	Desmoplakin	yes	no	2	0.0023612	120.15			By MS/MS		By matching
VSETDIQR	YSPRTPDRVSETDIQR	VSETDIQRLLHGVMEQ	R	V	S	Q	R	L	0	1	0	1	0	1	1	0	0	1	0	0	0	0	0	1	1	0	0	1	0	0	8	0	946.472	Q3TT51;P12961	Q3TT51	35	42	Scg5	Neuroendocrine protein 7B2;N-terminal peptide;C-terminal peptide	yes	no	2	0.0013545	145.34	By matching		By MS/MS
VSLTFSGR	NFARWRYRVSLTFSGR	VSLTFSGRTVTGQVKV	R	V	S	G	R	T	0	1	0	0	0	0	0	1	0	0	1	0	0	1	0	2	1	0	0	1	0	0	8	0	865.466	Q5BKQ4	Q5BKQ4	360	367	Pnliprp1	Inactive pancreatic lipase-related protein 1	yes	yes	2	0.00171	131.03			By MS/MS
VSTVALPR	TAATLNSRVSTVALPR	VSTVALPRSCPSAGTR	R	V	S	P	R	S	1	1	0	0	0	0	0	0	0	0	1	0	0	0	1	1	1	0	0	2	0	0	8	0	841.502	Q9D7Y7;Q9CPN9	Q9D7Y7	124	131	2210010C04Rik		yes	no	2	0.0039148	107.9		By MS/MS	By MS/MS
VTTHPLAK	HEVGFGCKVTTHPLAK	VTTHPLAKDKMMNGSH	K	V	T	A	K	D	1	0	0	0	0	0	0	0	1	0	1	1	0	0	1	0	2	0	0	1	0	0	8	0	865.502	A2A813;Q99LX0;A2A815	A2A813	123	130	Park7	Protein deglycase DJ-1	yes	no	2	0.0035961	110.12			By matching
VVSSIEQK	GARRSSWRVVSSIEQK	VVSSIEQKTEGAEKKQ	R	V	V	Q	K	T	0	0	0	0	0	1	1	0	0	1	0	1	0	0	0	2	0	0	0	2	0	0	8	0	888.492	P63101;D3YXN6;Q8BWN0	P63101	61	68	Ywhaz	14-3-3 protein zeta/delta	yes	no	2	0.0025847	105.14	By matching		By matching
WISIMTER	RKGTDVPKWISIMTER	WISIMTERSVCHLQKV	K	W	I	E	R	S	0	1	0	0	0	0	1	0	0	2	0	0	1	0	0	1	1	1	0	0	0	0	8	0	1034.52	Q542G9;P07356;Q3UCD3;Q99KH3;B0V2N5	Q542G9	213	220	Anxa2	Annexin;Annexin A2	yes	no	2	0.004311	105.14			By MS/MS
YDLTNENK	NDHDPFPRYDLTNENK	YDLTNENKHGTRCAGE	R	Y	D	N	K	H	0	0	2	1	0	0	1	0	0	0	1	1	0	0	0	0	1	0	1	0	0	0	8	0	995.456	Q32MU0;P63239;Q8BRQ2	Q32MU0	200	207	Pcsk1	Neuroendocrine convertase 1	yes	no	2	0.0098631	113.7					By MS/MS
YLPFVPSR	YCDNRNLKYLPFVPSR	YLPFVPSRMKYVYFQN	K	Y	L	S	R	M	0	1	0	0	0	0	0	0	0	0	1	0	0	1	2	1	0	0	1	1	0	0	8	0	977.533	Q8BNU3;Q543D2;P50608	Q8BNU3	99	106	Fmod	Fibromodulin	yes	no	2	0.043361	66.457		By matching		By MS/MS	By matching
AAALAHLDR	VELQLPAKAAALAHLD	AALAHLDRGGPPPVRE	K	A	A	D	R	G	4	1	0	1	0	0	0	0	1	0	2	0	0	0	0	0	0	0	0	0	0	0	9	0	936.514	A2A4I8;A2A4I9;O70423-2;Q812C9;O70423	A2A4I8	64	72	Aoc3;Aoc2	Amine oxidase;Membrane primary amine oxidase;Retina-specific copper amine oxidase	yes	no	2	0.00093074	119.62	By MS/MS	By matching		By MS/MS	By MS/MS
AALQELLSK	KIRGSLARAALQELLS	ALQELLSKGLIKLVSK	R	A	A	S	K	G	2	0	0	0	0	1	1	0	0	0	3	1	0	0	0	1	0	0	0	0	0	0	9	0	971.565	Q58EA6;P62852	Q58EA6	86	94	Rps25	40S ribosomal protein S25	yes	no	2	0.0030089	101.65
AASQPGELK	LNPDGFEKAASQPGEL	ASQPGELKDWFVGRSN	K	A	A	L	K	D	2	0	0	0	0	1	1	1	0	0	1	1	0	0	1	1	0	0	0	0	0	0	9	0	899.471	Q543R4;Q00493	Q543R4	165	173	Cpe	Carboxypeptidase E	yes	no	2	0.0034001	100.71			By MS/MS		By MS/MS
AAVSCLWGK	VHLTDAEKAAVSCLWG	AVSCLWGKVNSDEVGG	K	A	A	G	K	V	2	0	0	0	1	0	0	1	0	0	1	1	0	0	0	1	0	1	0	1	0	0	9	0	990.496	A8DUK0;P02088;A8DUL5;A8DUP5;A8DUP7;A8DUM2;A8DUP3;Q61650;Q61348	A8DUK0	10	18	Hbbt1;Hbb-b1	Hemoglobin subunit beta-1	yes	no	2	0.0049696	96.948			By MS/MS
ADHGEPIGR	AGGSFTVRADHGEPIG	DHGEPIGRGTKVILHL	R	A	D	G	R	G	1	1	0	1	0	0	1	2	1	1	0	0	0	0	1	0	0	0	0	0	0	0	9	0	950.457	Q71LX8;P11499	Q71LX8	169	177	Hsp90ab1	Heat shock protein HSP 90-beta	yes	no	2	0.012508	82.645
AEENALQQK	QATEQRRRAEENALQQ	EENALQQKACGSETMQ	R	A	E	Q	K	A	2	0	1	0	0	2	2	0	0	0	1	1	0	0	0	0	0	0	0	0	0	0	9	0	1029.51	E9Q557	E9Q557	1282	1290	Dsp	Desmoplakin	yes	yes	2	0.0012339	115.71			By MS/MS
AEILQSSGK	ILVIDPNKAEILQSSG	EILQSSGKNLFYLPHG	K	A	E	G	K	N	1	0	0	0	0	1	1	1	0	1	1	1	0	0	0	2	0	0	0	0	0	0	9	0	931.497	E9Q704;F8VQA4;P97467;Q3V1A8	E9Q704	464	472	Pam	Peptidyl-glycine alpha-amidating monooxygenase;Peptidylglycine alpha-hydroxylating monooxygenase;Peptidyl-alpha-hydroxyglycine alpha-amidating lyase	yes	no	2	0.00079811	123.86	By MS/MS		By MS/MS
AGLQFPVGR	KAKSRSSRAGLQFPVG	GLQFPVGRVHRLLRKG	R	A	G	G	R	V	1	1	0	0	0	1	0	2	0	0	1	0	0	1	1	0	0	0	0	1	0	0	9	0	943.524	F8WIX8;A0A0N4SV66;A0AUV1;A3KPD0;Q8CGP4;Q149V4;B2RWH3;B2RVF0;A2AB79;Q8CGP6;Q8R1M2;Q64523;Q8CGP7;Q8CGP5;Q8BFU2;Q6GSS7;P22752;B2RVP5;Q3THW5;P0C0S6;P27661;G3UWL7;Q3UA95;Q64522	F8WIX8	17	25	Hist1h2al;Hist1h2ah;Hist1h2aa;Hist2h2ac;Hist2h2aa1;Hist1h2ad;Hist3h2a;H2afj;Hist1h2ak;Hist1h2af;Hist1h2ab;H2afv;H2afz;H2afx;Hist2h2ab	Histone H2A;Histone H2A type 1-H;Histone H2A.J;Histone H2A type 2-C;Histone H2A type 1-K;Histone H2A type 1-F;Histone H2A type 3;Histone H2A type 2-A;Histone H2A type 1;Histone H2A.V;Histone H2A.Z;Histone H2AX;Histone H2A type 2-B	yes	no	2	0.00068231	127.56	By MS/MS		By MS/MS		By MS/MS
AIVWGMQTR	TLFSRHTKAIVWGMQT	IVWGMQTRAVQGMLDF	K	A	I	T	R	A	1	1	0	0	0	1	0	1	0	1	0	0	1	0	0	0	1	1	0	1	0	0	9	0	1060.55	Q3TED3;Q3V117;Q91V92;Q3UEA1	Q3TED3	489	497	Acly	ATP-citrate synthase	yes	no	2	0.003347	100.84
ALLTLADGR	ETSGDFRKALLTLADG	LLTLADGRRDESLKVD	K	A	L	G	R	R	2	1	0	1	0	0	0	1	0	0	3	0	0	0	0	0	1	0	0	0	0	0	9	0	928.534	Q8C1X9;Q3U737;Q3TLP4;Q3TFK4;O35639	Q8C1X9	155	163	Anxa3	Annexin;Annexin A3	yes	no	2	0.030604	66.962			By MS/MS
ANTFVAELK	VTTLDIVRANTFVAEL	NTFVAELKGLDPARVN	R	A	N	L	K	G	2	0	1	0	0	0	1	0	0	0	1	1	0	1	0	0	1	0	0	1	0	0	9	0	991.534	P08249;A0A0G2JF23	P08249	177	185	Mdh2	Malate dehydrogenase, mitochondrial	yes	no	2	0.046774	59.645			By MS/MS
APFDLFENK	ALLFIPRRAPFDLFEN	PFDLFENKKKKNNIKL	R	A	P	N	K	K	1	0	1	1	0	0	1	0	0	0	1	1	0	2	1	0	0	0	0	0	0	0	9	0	1079.53	Q71LX8;P11499;E9Q3D6	Q71LX8	339	347	Hsp90ab1	Heat shock protein HSP 90-beta	yes	no	2	0.00092668	119.75	By matching		By matching		By matching
APFDLFENR	ALLFVPRRAPFDLFEN	PFDLFENRKKKNNIKL	R	A	P	N	R	K	1	1	1	1	0	0	1	0	0	0	1	0	0	2	1	0	0	0	0	0	0	0	9	0	1107.53	Q80Y52;Q3UIF3;Q3TKA2;P07901;Q3TJU7;A0PJ91;Q3TKB9;Q8C5U3;Q3TKG0	Q80Y52	348	356	Hsp90aa1	Heat shock protein HSP 90-alpha	yes	no	2	0.000217	138.98
AQYEDIAQK	DSIIAEVKAQYEDIAQ	QYEDIAQKSKAEAEAL	K	A	Q	Q	K	S	2	0	0	1	0	2	1	0	0	1	0	1	0	0	0	0	0	0	1	0	0	0	9	0	1064.51	Q3UV17	Q3UV17	343	351	Krt76	Keratin, type II cytoskeletal 2 oral	yes	yes	1;2	0.00022285	192.32	By MS/MS	By MS/MS	By MS/MS	By MS/MS	By MS/MS
AVFPSIVGR	FAGDDAPRAVFPSIVG	VFPSIVGRPRHQGVMV	R	A	V	G	R	P	1	1	0	0	0	0	0	1	0	1	0	0	0	1	1	1	0	0	0	2	0	0	9	0	944.544	Q3UAF7;Q3UAF6;Q3U5R4;B2RRX1;P60710;Q3UAA9;Q3UA89;Q3U939;Q3U804;Q3UGS0;Q3TIJ9;E9Q1F2;E9Q5F4;G3UZ07;A1E281;E9Q606;E9Q2D1;F6WX90;Q7M0E4;Q4KL81;P63260;Q3TSB7;Q3UD81;G3UYG0;B1ATY1;Q3UBP6;Q3UBQ4	Q3UAF7	29	37	Actb;Actg1;Actc1	Actin, cytoplasmic 1;Actin, cytoplasmic 1, N-terminally processed;Actin, cytoplasmic 2;Actin, cytoplasmic 2, N-terminally processed	no	no	2	0.00060368	125.31	By MS/MS				By MS/MS
CCTLPEDQR	NLGRVGTKCCTLPEDQ	CTLPEDQRLPCVEDYL	K	C	C	Q	R	L	0	1	0	1	2	1	1	0	0	0	1	0	0	0	1	0	1	0	0	0	0	0	9	0	1177.49	Q546G4;P07724	Q546G4	461	469	Alb	Serum albumin	yes	no	2	0.017327	76.679	By matching	By matching		By matching	By MS/MS
CPEPCPPPK	PKPCSPPKCPEPCPPP	PEPCPPPKCPETCPPQ	K	C	P	P	K	C	0	0	0	0	2	0	1	0	0	0	0	1	0	0	5	0	0	0	0	0	0	0	9	0	1080.47	G5E8D1;A9JTY7;O70562;O70558;O70555;O70554;O70559	G5E8D1	29	37	Sprr2k;Sprr2b;Sprr2g;Sprr2d;Sprr2h	Small proline-rich protein 2K;Small proline-rich protein 2G;Small proline-rich protein 2D;Small proline-rich protein 2B;Small proline-rich protein 2H	yes	no	2	0.00028277	144.09			By MS/MS
CPLFEHFLK	EDEPARIKCPLFEHFL	PLFEHFLKYNYSTAHS	K	C	P	L	K	Y	0	0	0	0	1	0	1	0	1	0	2	1	0	2	1	0	0	0	0	0	0	0	9	0	1189.6	G3UY13;Q3UEL3;E9Q6I2;Q3V2X3;Q3UVZ1;Q61730-2;Q61730;Q61730-3	G3UY13	47	55	Il1rap	Interleukin-1 receptor accessory protein	yes	no	3	0.011527	74.173		By MS/MS
CVNLAPGFR	HPCYPGVRCVNLAPGF	VNLAPGFRCDACPVGF	R	C	V	F	R	C	1	1	1	0	1	0	0	1	0	0	1	0	0	1	1	0	0	0	0	1	0	0	9	0	1032.52	B2RTL6;Q9Z1T2	B2RTL6	343	351	Thbs4	Thrombospondin-4	yes	no	2	0.00068231	127.56	By MS/MS	By matching		By matching	By matching
DAAAEVPSR	QSPDAKHRDAAAEVPS	AAAEVPSRDTMEKRKD	R	D	A	S	R	D	3	1	0	1	0	0	1	0	0	0	0	0	0	0	1	1	0	0	0	1	0	0	9	0	914.446	P26339	P26339	139	147	Chga	Chromogranin-A;Pancreastatin;Beta-granin;WE-14;Catestatin;GE-25;Serpinin-RRG;Serpinin;p-Glu serpinin precursor	yes	yes	2	0.00034826	140.83	By MS/MS		By MS/MS		By MS/MS
DASVVGFFR	FKKFISDKDASVVGFF	ASVVGFFRDLFSDGHS	K	D	A	F	R	D	1	1	0	1	0	0	0	1	0	0	0	0	0	2	0	1	0	0	0	2	0	0	9	0	996.503	P27773	P27773	153	161	Pdia3	Protein disulfide-isomerase A3	yes	yes	2	0.00079123	124.08
DHENIIIAK	DKLGETYKDHENIIIA	HENIIIAKMDSTANEV	K	D	H	A	K	M	1	0	1	1	0	0	1	0	1	3	0	1	0	0	0	0	0	0	0	0	0	0	9	0	1051.57	Q3UDR2;Q3URP6;Q3U738;Q3TWE3;Q3TIM0;Q3THC3;Q3TF72;P09103;Q3TGS0;Q3UBY9;Q3UJA8;Q3UA23;Q3TIQ5;E9Q8G8	Q3UDR2	418	426	P4hb	Protein disulfide-isomerase	yes	no	2;3	4.4944e-05	187.5			By MS/MS
DILTLDLSR	APYPNYDRDILTLDLS	ILTLDLSRVTPNLMGQ	R	D	I	S	R	V	0	1	0	2	0	0	0	0	0	1	3	0	0	0	0	1	1	0	0	0	0	0	9	0	1044.58	Q9Z2R8;Q3TXB7;F8WI14;B7ZNR0;Q9QX30;Q3TDX7;Q61508-2;Q61508	Q9Z2R8	302	310	Ecm1	Extracellular matrix protein 1	yes	no	2	0.00057165	131.11					By matching
DIVVLGVEK	TAVGVRGKDIVVLGVE	IVVLGVEKKSVAKLQD	K	D	I	E	K	K	0	0	0	1	0	0	1	1	0	1	1	1	0	0	0	0	0	0	0	3	0	0	9	0	970.57	Q542H2;Q3UIT9;Q3TN31;Q9Z2U0	Q542H2	39	47	Psma7	Proteasome subunit alpha type;Proteasome subunit alpha type-7	yes	no	2	0.048051	59.067			By MS/MS
DLEALLNSK	LAAQARLKDLEALLNS	LEALLNSKEAALSTAL	K	D	L	S	K	E	1	0	1	1	0	0	1	0	0	0	3	1	0	0	0	1	0	0	0	0	0	0	9	0	1001.54	P48678-3;P48678-2;P48678	P48678-3	24	32	Lmna	Prelamin-A/C;Lamin-A/C	yes	no	2	0.0087842	87.806			By MS/MS
DLEVDTTLK	DANVVRDRDLEVDTTL	LEVDTTLKSLSQQIEN	R	D	L	L	K	S	0	0	0	2	0	0	1	0	0	0	2	1	0	0	0	0	2	0	0	1	0	0	9	0	1032.53	Q99LL6;P11087-2;P11087	Q99LL6	353	361	Col1a1	Collagen alpha-1(I) chain	yes	no	2	0.023056	70.908
DLTGVQNLR	VSSEDYGRDLTGVQNL	LTGVQNLRKKHKRLEA	R	D	L	L	R	K	0	1	1	1	0	1	0	1	0	0	2	0	0	0	0	0	1	0	0	1	0	0	9	0	1014.55	Q3TYI8;B7ZWK3;A3KGU5;B9EKJ1;B2RXX6;A3KGU7;E9Q447;A3KGU9;P16546-2;P16546	Q3TYI8	131	139	Sptan1	Spectrin alpha chain, non-erythrocytic 1	yes	no	2	0.0016973	111.95			By MS/MS
DQLIVNLLK	________________	QLIVNLLKEEQVPQNK	K	D	Q	L	K	E	0	0	1	1	0	1	0	0	0	1	3	1	0	0	0	0	0	0	0	1	0	0	9	0	1054.64	Q3UDU4;Q564E2;Q3TI99;Q3TCI7;G5E8N5;P06151;D3Z736;D3YZQ9;Q6NXW3	Q3UDU4	6	14	Ldha	L-lactate dehydrogenase;L-lactate dehydrogenase A chain	yes	no	2	0.027837	55.908			By MS/MS
DTDSEEEIR	TMMARKMKDTDSEEEI	TDSEEEIREAFRVFDK	K	D	T	I	R	E	0	1	0	2	0	0	3	0	0	1	0	0	0	0	0	1	1	0	0	0	0	0	9	0	1092.46	P62204;Q3UKW2;Q9D6P8	P62204	79	87	Calm1;Calml3	Calmodulin;Calmodulin-like protein 3	yes	no	2	0.00019352	161.79			By MS/MS		By MS/MS
DTPGFIVNR	GKHPVSCKDTPGFIVN	TPGFIVNRLLVPYLIE	K	D	T	N	R	L	0	1	1	1	0	0	0	1	0	1	0	0	0	1	1	0	1	0	0	1	0	0	9	0	1017.52	Q61425	Q61425	213	221	Hadh	Hydroxyacyl-coenzyme A dehydrogenase, mitochondrial	yes	yes	2	0.049902	58.23		By matching	By matching	By matching
DVKKLFIEK	QQTFRSSKDVKKLFIE	VKKLFIEKAEAEEKWF	K	D	V	E	K	A	0	0	0	1	0	0	1	0	0	1	1	3	0	1	0	0	0	0	0	1	0	0	9	2	1118.67	Q8CFJ0;E9Q6P8	Q8CFJ0	248	256	Rsrc1		yes	no	1	0.0043054	99.139	By MS/MS
DWNVDLIPK	PESMGRGRDWNVDLIP	WNVDLIPKFLMANGQL	R	D	W	P	K	F	0	0	1	2	0	0	0	0	0	1	1	1	0	0	1	0	0	1	0	1	0	0	9	0	1098.57	P50396;D6RI86;Q3UUX9;Q3TIY6;Q3UC72;Q3UPA3;Q61598-2;Q61598;Q9CZ18	P50396	71	79	Gdi1;Gdi2	Rab GDP dissociation inhibitor alpha;Rab GDP dissociation inhibitor beta	no	no	2	0.0026507	91.658					By matching
DYEVDATLK	SQPSLRPKDYEVDATL	YEVDATLKSLNNQIET	K	D	Y	L	K	S	1	0	0	2	0	0	1	0	0	0	1	1	0	0	0	0	1	0	1	1	0	0	9	0	1052.5	Q91VL4;Q3TP88;Q3TUE2;Q3TX57;Q3TU64;Q01149	Q91VL4	332	340	Col1a2	Collagen alpha-2(I) chain	yes	no	2	0.0074909	90.906			By matching
EDAANNYAR	PEQLITGKEDAANNYA	DAANNYARGHYTIGKE	K	E	D	A	R	G	3	1	2	1	0	0	1	0	0	0	0	0	0	0	0	0	0	0	1	0	0	0	9	0	1022.44	P05213;O89052;P68369;Q52L87;Q3TIZ0;P68373;Q5FW91;P05214;Q9JJZ2;A0A0A0MQA5;P68368;A0A087WRB4;A0A087WQS4	P05213	97	105	Tuba1b;Tuba1a;Tuba1c;Tuba3a;Tuba8;Tuba4a	Tubulin alpha-1B chain;Tubulin alpha-1A chain;Tubulin alpha-1C chain;Tubulin alpha-3 chain;Tubulin alpha-8 chain;Tubulin alpha-4A chain	no	no	2	0.0018867	110.41			By MS/MS
EEDSLHWQR	SLNKDAVKEEDSLHWQ	EDSLHWQRPGDVQKVK	K	E	E	Q	R	P	0	1	0	1	0	1	2	0	1	0	1	0	0	0	0	1	0	1	0	0	0	0	9	0	1198.54	D3YW52;Q61838	D3YW52	1189	1197	Pzp;A2m	Alpha-2-macroglobulin;Alpha-2-macroglobulin 165 kDa subunit;Alpha-2-macroglobulin 35 kDa subunit	yes	no	2;3	4.882e-05	186.41	By MS/MS
EEILAALEK	NLEKNSTKEEILAALE	EILAALEKGCSFLPDP	K	E	E	E	K	G	2	0	0	0	0	0	3	0	0	1	2	1	0	0	0	0	0	0	0	0	0	0	9	0	1014.56	Q3TWM9;Q3UAS4;Q3UE29;E9PZ00;Q3TXJ0;Q8BFQ1;Q3U8C4;Q3U897;Q3U825;Q3U5W2;Q3TXP9;Q3TWL8;Q3TWF9;Q3TWE9;Q3TKK3;Q3TKB2;Q3TIT5;Q3TID4;K3W4L3;B2RUD7;Q3UFE8;J3QPG5;Q61207	Q3TWM9	433	441	Psap	Prosaposin	yes	no	2	0.018227	76.282			By MS/MS
EENKGGEDK	IISSIEQKEENKGGED	ENKGGEDKLKMIREYR	K	E	E	D	K	L	0	0	1	1	0	0	3	2	0	0	0	2	0	0	0	0	0	0	0	0	0	0	9	1	1004.44	Q5SS40;P62259;Q8BPH1;D6REF3;F6WA09	Q5SS40	70	78	Ywhae	14-3-3 protein epsilon	yes	no	1	0.048516	38.792
EIAEAYLGK	SMVLTKMKEIAEAYLG	IAEAYLGKTVTNAVVT	K	E	I	G	K	T	2	0	0	0	0	0	2	1	0	1	1	1	0	0	0	0	0	0	1	0	0	0	9	0	992.518	Q3UBA6;Q3TZJ3;Q3TH56;Q3TEK2;P63017;Q504P4;Q3U9L2;Q3TF16;Q3TQ13;Q3UDS0;Q3ULM1;Q3TRH3;Q3TB63;Q3KQJ4	Q3UBA6	129	137	Hspa8	Heat shock cognate 71 kDa protein	yes	no	2	0.03207	66.299			By matching
EIIDLVLDR	RGHYTIGKEIIDLVLD	IIDLVLDRIRKLADQC	K	E	I	D	R	I	0	1	0	2	0	0	1	0	0	2	2	0	0	0	0	0	0	0	0	1	0	0	9	0	1084.61	P05213;Q99KA2;P68369;Q52L87;Q3TIZ0;P68373	P05213	113	121	Tuba1b;Tuba1a;Tuba1c	Tubulin alpha-1B chain;Tubulin alpha-1A chain;Tubulin alpha-1C chain	no	no	2	0.00022102	156.35	By MS/MS		By MS/MS		By MS/MS
ELEELEHLK	EAQVQKVRELEELEHL	LEELEHLKLDFWRDPA	R	E	L	L	K	L	0	0	0	0	0	0	4	0	1	0	3	1	0	0	0	0	0	0	0	0	0	0	9	0	1138.59	Q7TPZ8	Q7TPZ8	41	49	Cpa1	Carboxypeptidase A1	yes	yes	2;3	0.00064191	128.86	By matching		By MS/MS
ELSTLHGTK	ALVKGAAKELSTLHGT	LSTLHGTKYTYGPGAT	K	E	L	T	K	Y	0	0	0	0	0	0	1	1	1	0	2	1	0	0	0	1	2	0	0	0	0	0	9	0	984.524	B2RS76	B2RS76	335	343	Cpb1		yes	yes	2	0.0024045	106.2		By matching	By MS/MS	By matching	By matching
EMQPTHPIR	EAFEISKKEMQPTHPI	MQPTHPIRLGLALNFS	K	E	M	I	R	L	0	1	0	0	0	1	1	0	1	1	0	0	1	0	2	0	1	0	0	0	0	0	9	0	1107.55	P63101;Q3UA58;A3KML3;F6YY69;F6VW30;P68254-2;P68254;A2A5N2;Q9CQV8-2;Q9CQV8	P63101	159	167	Ywhaz;Ywhaq;Ywhab	14-3-3 protein zeta/delta;14-3-3 protein theta;14-3-3 protein beta/alpha;14-3-3 protein beta/alpha, N-terminally processed	no	no	2;3	0.0012339	115.71	By MS/MS	By matching	By MS/MS		By MS/MS
EMSVQEAYK	IVDPETNKEMSVQEAY	MSVQEAYKKGLIDYDT	K	E	M	Y	K	K	1	0	0	0	0	1	2	0	0	0	0	1	1	0	0	1	0	0	1	1	0	0	9	0	1083.49	E9Q557;E9PZW0;Q8BP77	E9Q557	2488	2496	Dsp	Desmoplakin	yes	no	2	0.013113	81.972			By MS/MS
ENVRREATR	________________	NVRREATRPSVPSGTL	M	E	N	T	R	P	1	3	1	0	0	0	2	0	0	0	0	0	0	0	0	0	1	0	0	1	0	0	9	2	1129.6	A6H6Q4	A6H6Q4	2	10		Uncharacterized protein C19orf71 homolog	yes	yes	2	0.0061475	94.692	By MS/MS	By MS/MS	By matching	By matching	By MS/MS
EQGVLSFWR	DCVVRIPKEQGVLSFW	QGVLSFWRGNLANVIR	K	E	Q	W	R	G	0	1	0	0	0	1	1	1	0	0	1	0	0	1	0	1	0	1	0	1	0	0	9	0	1120.57	Q545A2;P51881	Q545A2	64	72	Slc25a5	ADP/ATP translocase 2;ADP/ATP translocase 2, N-terminally processed	yes	no	2	0.05203	57.267			By matching
ESTLHLVLR	LSDYNIQKESTLHLVL	STLHLVLRLRGG____	K	E	S	L	R	L	0	1	0	0	0	0	1	0	1	0	3	0	0	0	0	1	1	0	0	1	0	0	9	0	1066.61	A5JUZ1;A0A0A6YW67;E9Q9J0;Q66JP1;Q8C2K3;Q642L7;E9Q4P0;E9Q5F6;Q922B0;E9QNP0;Q5SX22;Q3TH47;Q78XY9;Q6NZC5;Q8R0Z9;Q922Z8;Q8VC46;P62984;P62983;P0CG49;P0CG50;B0LAC2;J3QK04	A5JUZ1	64	72	Ubc;Gm8797;Uba52;Gm1821;Rps27a;Kxd1;Ubb;Gm7808	Ubiquitin-60S ribosomal protein L40;Ubiquitin;60S ribosomal protein L40;Ubiquitin-40S ribosomal protein S27a;Ubiquitin;40S ribosomal protein S27a;Polyubiquitin-B;Ubiquitin;Polyubiquitin-C;Ubiquitin;Ubiquitin-related 1;Ubiquitin-related 2	yes	no	2;3	0.00019385	159.58	By MS/MS		By MS/MS
ETAEAYLGK	AMVLTKMKETAEAYLG	TAEAYLGKKVTHAVVT	K	E	T	G	K	K	2	0	0	0	0	0	2	1	0	0	1	1	0	0	0	0	1	0	1	0	0	0	9	0	980.481	Q3U9G2;Q3TWF2;P20029;Q9DC41;Q3TKF8;Q3TI47;Q3U7T8;Q3U6V3;Q3UEM8	Q3U9G2	156	164	Hspa5	78 kDa glucose-regulated protein	yes	no	2	0.030604	71.614			By MS/MS
EVGVYEALK	AKVKLQGKEVGVYEAL	VGVYEALKDDSWLKGE	K	E	V	L	K	D	1	0	0	0	0	0	2	1	0	0	1	1	0	0	0	0	0	0	1	2	0	0	9	0	1006.53	P14152	P14152	206	214	Mdh1	Malate dehydrogenase, cytoplasmic	yes	yes	2	0.023056	70.908
FAFQAEVNR	ELREKSEKFAFQAEVN	AFQAEVNRMMKLIINS	K	F	A	N	R	M	2	1	1	0	0	1	1	0	0	0	0	0	0	2	0	0	0	0	0	1	0	0	9	0	1080.54	Q91V38;Q3UAD6;P08113;Q3UBU0;Q8C2R2	Q91V38	76	84	Hsp90b1	Endoplasmin	yes	no	2	0.00058282	130.75			By matching		By MS/MS
FDDENFILK	GKSIYGKKFDDENFIL	DDENFILKHTGPGLLS	K	F	D	L	K	H	0	0	1	2	0	0	1	0	0	1	1	1	0	2	0	0	0	0	0	0	0	0	9	0	1139.55	Q9QZH3	Q9QZH3	219	227	Ppie	Peptidyl-prolyl cis-trans isomerase E	yes	yes	2	0.0019782	109.66				By matching	By MS/MS
FEDENFILK	GRSIYGEKFEDENFIL	EDENFILKHTGPGILS	K	F	E	L	K	H	0	0	1	1	0	0	2	0	0	1	1	1	0	2	0	0	0	0	0	0	0	0	9	0	1153.57	Q5SVY2;Q3UAJ1;Q3TE63;P17742;Q9CZK9;F8VPN3	Q5SVY2	83	91	Ppia;Gm5160	Peptidyl-prolyl cis-trans isomerase;Peptidyl-prolyl cis-trans isomerase A;Peptidyl-prolyl cis-trans isomerase A, N-terminally processed	yes	no	2	0.00033712	126.07	By MS/MS		By MS/MS		By matching
FGDSNTVMR	QDSLESMKFGDSNTVM	GDSNTVMRFLNEQKNL	K	F	G	M	R	F	0	1	1	1	0	0	0	1	0	0	0	0	1	1	0	1	1	0	0	1	0	0	9	0	1025.46	E9Q557;E9PZW0	E9Q557	929	937	Dsp	Desmoplakin	yes	no	2	0.00026594	162.97	By matching		By MS/MS
FGFGLLNAK	AGLMVNSRFGFGLLNA	GFGLLNAKALVDLADP	R	F	G	A	K	A	1	0	1	0	0	0	0	2	0	0	2	1	0	2	0	0	0	0	0	0	0	0	9	0	965.533	Q32MU0;P63239	Q32MU0	439	447	Pcsk1	Neuroendocrine convertase 1	yes	no	2	0.0011531	116.37			By MS/MS		By MS/MS
FPNSEVEVK	CSETYRGKFPNSEVEV	PNSEVEVKSIVDFVTS	K	F	P	V	K	S	0	0	1	0	0	0	2	0	0	0	0	1	0	1	1	1	0	0	0	2	0	0	9	0	1047.52	Q7TPZ8	Q7TPZ8	279	287	Cpa1	Carboxypeptidase A1	yes	yes	2	0.049023	63.216			By MS/MS
FSMEDLNKR	QQRQNQRRFSMEDLNK	SMEDLNKRLSLPMDIR	R	F	S	K	R	L	0	1	1	1	0	0	1	0	0	0	1	1	1	1	0	1	0	0	0	0	0	0	9	1	1138.54	Q0VDL6;Q04899	Q0VDL6	65	73	Cdk18	Cyclin-dependent kinase 18	yes	no	2	0.021799	57.59		By matching	By matching		By MS/MS
FVMQEEFSR	IRTAKGEKFVMQEEFS	VMQEEFSRDGKALEQF	K	F	V	S	R	D	0	1	0	0	0	1	2	0	0	0	0	0	1	2	0	1	0	0	0	1	0	0	9	0	1171.53	P27773	P27773	336	344	Pdia3	Protein disulfide-isomerase A3	yes	yes	2	0.0008139	123.35	By matching		By MS/MS
GDFCIQVGR	DSKPGTIRGDFCIQVG	DFCIQVGRNIIHGSDS	R	G	D	G	R	N	0	1	0	1	1	1	0	2	0	1	0	0	0	1	0	0	0	0	0	1	0	0	9	0	1050.49	Q5NC82;E9PZF0;Q01768;B0LAA8;Q8R4B4;Q5NC80	Q5NC82	106	114	Nme2;Gm20390;Nme1	Nucleoside diphosphate kinase;Nucleoside diphosphate kinase B	no	no	2	0.0052353	96.311			By MS/MS
GDYPLEAVR	MLSGETAKGDYPLEAV	DYPLEAVRMQHLIARE	K	G	D	V	R	M	1	1	0	1	0	0	1	1	0	0	1	0	0	0	1	0	0	0	1	1	0	0	9	0	1018.51	P52480;P52480-2	P52480	368	376	Pkm	Pyruvate kinase PKM	no	no	2	0.013132	81.95	By matching		By matching
GFFYTPMSR	LYLVCGERGFFYTPMS	FFYTPMSRREVEDPQV	R	G	F	S	R	R	0	1	0	0	0	0	0	1	0	0	0	0	1	2	1	1	1	0	1	0	0	0	9	0	1104.51	Q5EEX1;P01326;D0EY27;E0CXX7;D3YWU5;D3Z596;D3Z595	Q5EEX1	47	55	Ins2	Insulin-2;Insulin-2 B chain;Insulin-2 A chain	yes	no	2	0.00058282	130.75	By MS/MS		By MS/MS	By MS/MS	By MS/MS
GLSAQQQAR	QATGDSERGLSAQQQA	LSAQQQARKAKQEEKE	R	G	L	A	R	K	2	1	0	0	0	3	0	1	0	0	1	0	0	0	0	1	0	0	0	0	0	0	9	0	957.499	P26339;Q3UN28	P26339	223	231	Chga	Chromogranin-A;Pancreastatin;Beta-granin;WE-14;Catestatin;GE-25;Serpinin-RRG;Serpinin;p-Glu serpinin precursor	yes	no	2	0.00017834	150.05	By MS/MS		By MS/MS	By MS/MS	By MS/MS
GLTSVINQK	LPCILNARGLTSVINQ	LTSVINQKLKDDEVAQ	R	G	L	Q	K	L	0	0	1	0	0	1	0	1	0	1	1	1	0	0	0	1	1	0	0	1	0	0	9	0	958.545	P16125;Q5M8R7	P16125	300	308	Ldhb	L-lactate dehydrogenase B chain	yes	no	2	7.4516e-06	136.27		By matching		By matching	By MS/MS
GSEYFGNGR	DLGGEAIKGSEYFGNG	SEYFGNGRVTEFKYGA	K	G	S	G	R	V	0	1	1	0	0	0	1	3	0	0	0	0	0	1	0	1	0	0	1	0	0	0	9	0	985.425	Q8C5B4;P00688	P00688	256	264	Amy2	Alpha-amylase;Pancreatic alpha-amylase	no	no	2	0.00038952	138.78	By MS/MS	By MS/MS	By MS/MS	By MS/MS	By matching
GVQYLNEIK	NILTDITKGVQYLNEI	VQYLNEIKDSVVAGFQ	K	G	V	I	K	D	0	0	1	0	0	1	1	1	0	1	1	1	0	0	0	0	0	0	1	1	0	0	9	0	1062.57	Q8C153;Q3UZ14;Q3UMI7;Q3UDC8;Q3TX47;Q3TWX1;Q3TLB1;Q3TJZ1;P58252;Q6P9L9;Q8BMA8;Q3TW58;Q3UBL9;Q3TK17;Q3TSK4;Q3TPG2;Q99LT6;Q61509	Q8C153	668	676	Eef2	Elongation factor 2	yes	no	2	0.0063462	93.649	By matching		By MS/MS		By matching
HFVGMLPEK	ATITDPFKHFVGMLPE	FVGMLPEKDCRYALYD	K	H	F	E	K	D	0	0	0	0	0	0	1	1	1	0	1	1	1	1	1	0	0	0	0	1	0	0	9	0	1056.54	Q4FK36;Q9R0P5	Q4FK36	70	78	Dstn	Destrin	yes	no	2	0.033957	74.173
HGGPLPYYR	MRDVTVERHGGPLPYY	GGPLPYYRRPVLDREY	R	H	G	Y	R	R	0	1	0	0	0	0	0	2	1	0	1	0	0	0	2	0	0	0	2	0	0	0	9	0	1058.53	A2A4I8;A2A4I9;O70423-2;Q812C9;O70423	A2A4I8	117	125	Aoc3;Aoc2	Amine oxidase;Membrane primary amine oxidase;Retina-specific copper amine oxidase	yes	no	2	0.0001697	173.68		By MS/MS		By MS/MS
IALVITDGR	LPPTQNNRIALVITDG	ALVITDGRSDTQRDTT	R	I	A	G	R	S	1	1	0	1	0	0	0	1	0	2	1	0	0	0	0	0	1	0	0	1	0	0	9	0	956.565	Q04857;B0LAD9;Q99LW4	Q04857	722	730	Col6a1	Collagen alpha-1(VI) chain	yes	no	2	0.0063676	102.62	By MS/MS
IDSLLESDR	YFWMNGDRIDSLLESD	DSLLESDRQQSQVLDA	R	I	D	D	R	Q	0	1	0	2	0	0	1	0	0	1	2	0	0	0	0	2	0	0	0	0	0	0	9	0	1046.52	Q9JK98;Q549A5;Q06890;E9Q9B8;E9PUU2;E9PXG5;E9Q8Y5	Q9JK98	82	90	Clu	Clusterin;Clusterin;Clusterin beta chain;Clusterin alpha chain	yes	no	2	0.003773	99.815			By MS/MS
IDSVWPFEK	NQGHIKPRIDSVWPFE	DSVWPFEKVADAMKQM	R	I	D	E	K	V	0	0	0	1	0	0	1	0	0	1	0	1	0	1	1	1	0	1	0	1	0	0	9	0	1119.56	Q5RKP0;Q499X4;Q3TXD3;Q62465;Q3U331	Q5RKP0	366	374	Vat1	Synaptic vesicle membrane protein VAT-1 homolog	yes	no	2	0.018275	76.228	By matching		By matching
IEVLEEELR	DLKLKNTKIEVLEEEL	EVLEEELRLARDANSE	K	I	E	L	R	L	0	1	0	0	0	0	4	0	0	1	2	0	0	0	0	0	0	0	0	1	0	0	9	0	1128.6	E9Q557;E9PZW0	E9Q557	1046	1054	Dsp	Desmoplakin	yes	no	2	1.13e-05	196.99			By MS/MS
IGFPWSEIR	HDDKLTPKIGFPWSEI	GFPWSEIRNISFNDKK	K	I	G	I	R	N	0	1	0	0	0	0	1	1	0	2	0	0	0	1	1	1	0	1	0	0	0	0	9	0	1103.58	Q8C2N4;Q7TSG6;Q05CE6;Q05DU4;Q3TZQ2;Q4KML7;Q3UXR4;Q3UL48;Q3TCP5;Q3UJJ8;Q3TH46;Q3U111;P26041;P26043;P26040;Q8CBU4	Q8C2N4	238	246	Rdx;Msn;Ezr	Moesin;Radixin;Ezrin	yes	no	2	0.0032752	115.71		By matching	By MS/MS	By MS/MS	By MS/MS
IGPLGLSPK	ATSALAPKIGPLGLSP	GPLGLSPKKVGDDIAK	K	I	G	P	K	K	0	0	0	0	0	0	0	2	0	1	2	1	0	0	2	1	0	0	0	0	0	0	9	0	880.538	Q8C2K0;Q5BLK0;Q3TIQ2;P35979;Q6DI58	Q8C2K0	32	40	Rpl12	60S ribosomal protein L12	yes	no	2	0.0085538	83.647	By matching		By matching
IHPVSTMVK	SMLKNLSRIHPVSTMV	HPVSTMVKGMYGIENE	R	I	H	V	K	G	0	0	0	0	0	0	0	0	1	1	0	1	1	0	1	1	1	0	0	2	0	0	9	0	1010.56	P16125;Q5M8R7	P16125	271	279	Ldhb	L-lactate dehydrogenase B chain	yes	no	2	0.035371	71.614
IIIHGFIDK	FRTNRKTRIIIHGFID	IIHGFIDKGEENWLSD	R	I	I	D	K	G	0	0	0	1	0	0	0	1	1	4	0	1	0	1	0	0	0	0	0	0	0	0	9	0	1054.62	Q6P8U6;Q9D950	Q6P8U6	89	97	Pnlip;mCG_10680	Pancreatic triacylglycerol lipase;Triacylglycerol lipase	yes	no	3	0.015912	63.076			By MS/MS
IMDCVGCDK	LHFKNISRIMDCVGCD	MDCVGCDKCRLWGKLQ	R	I	M	D	K	C	0	0	0	2	2	0	0	1	0	1	0	1	1	0	0	0	0	0	0	1	0	0	9	0	1096.44	Q14DR9;Q8R2E9	Q14DR9	387	395	Ero1lb	ERO1-like protein beta	yes	no	2	0.0030518	101.54					By MS/MS
INEAFDLLR	THVLPFEKINEAFDLL	NEAFDLLRSGKSIRTV	K	I	N	L	R	S	1	1	1	1	0	0	1	0	0	1	2	0	0	1	0	0	0	0	0	0	0	0	9	0	1089.58	Q3UKA4;P00329	Q3UKA4	356	364	Adh1	Alcohol dehydrogenase 1	yes	no	2	5.2834e-06	136.57					By MS/MS
IVQFSPSGK	SDGYCNSRIVQFSPSG	VQFSPSGKFITQWGEE	R	I	V	G	K	F	0	0	0	0	0	1	0	1	0	1	0	1	0	1	1	2	0	0	0	1	0	0	9	0	961.523	E9Q704;F8VQA4;P97467;Q3V1A8;F6TGI4	E9Q704	553	561	Pam	Peptidyl-glycine alpha-amidating monooxygenase;Peptidylglycine alpha-hydroxylating monooxygenase;Peptidyl-alpha-hydroxyglycine alpha-amidating lyase	yes	no	2	0.0030089	101.65			By MS/MS
IVSHPYWNK	EQYVNVQKIVSHPYWN	VSHPYWNKNNVVAGYD	K	I	V	N	K	N	0	0	1	0	0	0	0	0	1	1	0	1	0	0	1	1	0	1	1	1	0	0	9	0	1142.59	Q91X79	Q91X79	103	111	Cela1	Chymotrypsin-like elastase family member 1	yes	yes	2;3	0.00022849	146.79	By MS/MS	By MS/MS	By MS/MS	By MS/MS
KLEAMTNSK	AKVENAARKLEAMTNS	LEAMTNSKQSIAKKID	R	K	L	S	K	Q	1	0	1	0	0	0	1	0	0	0	1	2	1	0	0	1	1	0	0	0	0	0	9	1	1020.53	Q64727	Q64727	373	381	Vcl	Vinculin	yes	yes	2	0.028048	82.494		By MS/MS
LAEPSQLLK	GQTTNLQRLAEPSQLL	AEPSQLLKSAIVHLIN	R	L	A	L	K	S	1	0	0	0	0	1	1	0	0	0	3	1	0	0	1	1	0	0	0	0	0	0	9	0	997.581	Q02257	Q02257	116	124	Jup	Junction plakoglobin	yes	yes	2	0.0018064	111.06	By matching		By MS/MS
LASPVTLSK	GYDIALIKLASPVTLS	ASPVTLSKNIQTACLP	K	L	A	S	K	N	1	0	0	0	0	0	0	0	0	0	2	1	0	0	1	2	1	0	0	1	0	0	9	0	914.544	P05208	P05208	129	137	Cela2a	Chymotrypsin-like elastase family member 2A	yes	yes	2	0.0022807	107.21	By MS/MS	By MS/MS	By MS/MS	By matching
LEVNLQAMK	ATEDAKLRLEVNLQAM	EVNLQAMKAQFERDLQ	R	L	E	M	K	A	1	0	1	0	0	1	1	0	0	0	2	1	1	0	0	0	0	0	0	1	0	0	9	0	1044.56	Q8VDD5;Q3UFT0;Q99JJ3;Q811J9	Q8VDD5	1558	1566	Myh9	Myosin-9	yes	no	2	0.04292	78.516
LFPSGLDQK	DCGGGYVKLFPSGLDQ	FPSGLDQKDMHGDSEY	K	L	F	Q	K	D	0	0	0	1	0	1	0	1	0	0	2	1	0	1	1	1	0	0	0	0	0	0	9	0	1003.53	B2MWM9;P14211;Q3UWP8	B2MWM9	112	120	Calr	Calreticulin	yes	no	2	0.0026733	104.01	By MS/MS		By MS/MS		By MS/MS
LGVTADDVK	AKSQIALKLGVTADDV	GVTADDVKNVIIWGNH	K	L	G	V	K	N	1	0	0	2	0	0	0	1	0	0	1	1	0	0	0	0	1	0	0	2	0	0	9	0	916.487	P14152	P14152	171	179	Mdh1	Malate dehydrogenase, cytoplasmic	yes	yes	2	0.0078061	90.15			By matching
LIDEYDSTK	ADSTKNRKLIDEYDST	IDEYDSTKSGLDHKFQ	K	L	I	T	K	S	0	0	0	2	0	0	1	0	0	1	1	1	0	0	0	1	1	0	1	0	0	0	9	0	1082.51	P47867;P47867-2	P47867	119	127	Scg3	Secretogranin-3	yes	no	2	0.00079811	123.86	By MS/MS		By MS/MS
LKPLEVELR	EEIAKVEKLKPLEVEL	KPLEVELRRLEDLSES	K	L	K	L	R	R	0	1	0	0	0	0	2	0	0	0	3	1	0	0	1	0	0	0	0	1	0	0	9	1	1095.67	Q9D1D4;Q9D1D4-2	Q9D1D4	144	152	Tmed10	Transmembrane emp24 domain-containing protein 10	yes	no	3	0.014814	61.161			By MS/MS
LLCGLLSDR	AQNRNYSKLLCGLLSD	LCGLLSDRLHISPDRV	K	L	L	D	R	L	0	1	0	1	1	0	0	1	0	0	4	0	0	0	0	1	0	0	0	0	0	0	9	0	1045.56	Q545F0;P34884	Q545F0	79	87	Mif	Macrophage migration inhibitory factor	yes	no	2	0.00081849	123.21			By matching		By MS/MS
LLLPGELAK	REIQTAVRLLLPGELA	LLPGELAKHAVSEGTK	R	L	L	A	K	H	1	0	0	0	0	0	1	1	0	0	4	1	0	0	1	0	0	0	0	0	0	0	9	0	952.596	A0JLV3;B2RVD5;B2RTK3;Q8CBB6;Q921L4;Q8CGP2;Q8CGP1;Q6ZWY9;Q64525;Q64478;Q64475;P10854;P10853;Q8CGP2-2;A0JNS9;Q9D2U9;Q8CGP0;Q64524;P70696	A0JLV3	98	106	Hist1h2bj;Hist1h2bk;Hist1h2bm;Hist1h2br;LOC665622;Hist1h2bp;Hist1h2bc;Hist2h2bb;Hist1h2bh;Hist1h2bb;Hist1h2bf;Hist1h2ba;Hist3h2ba;Hist3h2bb;Hist2h2be	Histone H2B;Histone H2B type 1-P;Histone H2B type 1-K;Histone H2B type 1-C/E/G;Histone H2B type 2-B;Histone H2B type 1-H;Histone H2B type 1-B;Histone H2B type 1-M;Histone H2B type 1-F/J/L;Histone H2B type 3-A;Histone H2B type 3-B;Histone H2B type 2-E;Histone H2B type 1-A	yes	no	2	0.0026507	104.2			By MS/MS		By MS/MS
LLQDFFNGK	TRIPKIQKLLQDFFNG	LQDFFNGKELNKSINP	K	L	L	G	K	E	0	0	1	1	0	1	0	1	0	0	2	1	0	2	0	0	0	0	0	0	0	0	9	0	1080.56	Q3UBA6;Q3TZJ3;Q3TH56;Q3TEK2;P63017;Q504P4;Q3U9L2;Q3TF16;Q3TQ13;Q3UDS0;Q3ULM1;Q3TRH3;Q3TB63;Q3KQJ4;Q3TH04;Q3UXU1;B7U582;P17156	Q3UBA6	349	357	Hspa8;Hspa2	Heat shock cognate 71 kDa protein;Heat shock-related 70 kDa protein 2	yes	no	2	0.00022045	147.19			By MS/MS		By MS/MS
LLQLQEQMR	PCDAYQKRLLQLQEQM	LQLQEQMRALYKAISV	R	L	L	M	R	A	0	1	0	0	0	3	1	0	0	0	3	0	1	0	0	0	0	0	0	0	0	0	9	0	1157.62	E9Q557;E9PZW0	E9Q557	154	162	Dsp	Desmoplakin	yes	no	2	0.00021235	155.07	By MS/MS		By MS/MS
LNNLVLFDK	SKGKVRDKLNNLVLFD	NNLVLFDKATYDKLCK	K	L	N	D	K	A	0	0	2	1	0	0	0	0	0	0	3	1	0	1	0	0	0	0	0	1	0	0	9	0	1074.61	Q58EA6;P62852	Q58EA6	44	52	Rps25	40S ribosomal protein S25	yes	no	2	0.019522	74.841			By matching
LPFPIIDDK	NGETPTEKLPFPIIDD	PFPIIDDKGRDLAILL	K	L	P	D	K	G	0	0	0	2	0	0	0	0	0	2	1	1	0	1	2	0	0	0	0	0	0	0	9	0	1056.59	Q53ZU7;O08709;Q6GT24;D3Z0Y2;Q6A0D0;Q8BPD3;Q8BG37	Q53ZU7	98	106	Prdx6;Prdx6b	Peroxiredoxin-6	yes	no	2	0.00029716	143.37	By matching		By MS/MS
LQLLEPFDK	DVSPTSQRLQLLEPFD	QLLEPFDKWDGKDLED	R	L	Q	D	K	W	0	0	0	1	0	1	1	0	0	0	3	1	0	1	1	0	0	0	0	0	0	0	9	0	1101.61	Q99KI0	Q99KI0	565	573	Aco2	Aconitate hydratase, mitochondrial	yes	yes	2	0.00095903	118.71
LSLDVEALR	RTQEELRRLSLDVEAL	SLDVEALRRQLVQEQE	R	L	S	L	R	R	1	1	0	1	0	0	1	0	0	0	3	0	0	0	0	1	0	0	0	1	0	0	9	0	1014.57	E9Q557;Q9CV95	E9Q557	1669	1677	Dsp	Desmoplakin	yes	no	3	0.044717	42.287				By MS/MS
LSSAMSAAK	AAVIKARKLSSAMSAA	SSAMSAAKAIADHIRD	K	L	S	A	K	A	3	0	0	0	0	0	0	0	0	0	1	1	1	0	0	3	0	0	0	0	0	0	9	0	864.438	P14152	P14152	240	248	Mdh1	Malate dehydrogenase, cytoplasmic	yes	yes	2	0.014266	80.688					By MS/MS
LSSVDSVLK	QMAALFKRLSSVDSVL	SSVDSVLKRMTIIGVI	R	L	S	L	K	R	0	0	0	1	0	0	0	0	0	0	2	1	0	0	0	3	0	0	0	2	0	0	9	0	946.534	A1L0U6;A2AS98;P28660-2;P28660	A1L0U6	902	910	Nckap1	Nck-associated protein 1	yes	no	2	0.002305	107.01	By MS/MS	By matching	By MS/MS		By MS/MS
LTYEIEDEK	ELNEKITRLTYEIEDE	TYEIEDEKRRRKTVED	R	L	T	E	K	R	0	0	0	1	0	0	3	0	0	1	1	1	0	0	0	0	1	0	1	0	0	0	9	0	1138.54	E9Q557;E9PZW0	E9Q557	1126	1134	Dsp	Desmoplakin	yes	no	2	0.001074	117.01			By MS/MS
MFASFPTTK	YGAEALERMFASFPTT	FASFPTTKTYFPHFDV	R	M	F	T	K	T	1	0	0	0	0	0	0	0	0	0	0	1	1	2	1	1	2	0	0	0	0	0	9	0	1028.5	Q9CY10;Q91VB8;Q8BPF4;A8DUV3;P01942;Q9QWJ3;Q9CY06;Q9CWS5;Q61287;A8DUV1;Q61649	Q9CY10	33	41	haemaglobin alpha 2;Hbat1;Hba	Hemoglobin subunit alpha	yes	no	2	0.0030089	101.65			By MS/MS
MLEVPYVDR	GRQSNILKMLEVPYVD	LEVPYVDRNTCKLSTS	K	M	L	D	R	N	0	1	0	1	0	0	1	0	0	0	1	0	1	0	1	0	0	0	1	2	0	0	9	0	1120.56	Q4FJS7;Q3TBR2;Q3TDB9;Q3U3V1;O88947	Q4FJS7	376	384	F10	Coagulation factor X;Factor X light chain;Factor X heavy chain;Activated factor Xa heavy chain	yes	no	2	0.026438	68.847
NFAACNHLR	DGIWEGTRNFAACNHL	FAACNHLRSYKFYTDS	R	N	F	L	R	S	2	1	2	0	1	0	0	0	1	0	1	0	0	1	0	0	0	0	0	0	0	0	9	0	1101.51	Q6P8U6;Q4VBW7;P17892	Q6P8U6	274	282	Pnlip;Pnliprp2	Pancreatic triacylglycerol lipase;Triacylglycerol lipase;Pancreatic lipase-related protein 2	yes	no	3	0.018565	60.118		By MS/MS
NGQWTLIGR	VVSGYRVRNGQWTLIG	GQWTLIGRQSPQLPQA	R	N	G	G	R	Q	0	1	1	0	0	1	0	2	0	1	1	0	0	0	0	0	1	1	0	0	0	0	9	0	1043.55	E9Q704;F8VQA4;P97467;Q8BQ31	E9Q704	256	264	Pam	Peptidyl-glycine alpha-amidating monooxygenase;Peptidylglycine alpha-hydroxylating monooxygenase;Peptidyl-alpha-hydroxyglycine alpha-amidating lyase	yes	no	2	0.014266	80.688	By matching		By MS/MS
NILGGTVFR	KSPNGTIRNILGGTVF	ILGGTVFREPIICKNI	R	N	I	F	R	E	0	1	1	0	0	0	0	2	0	1	1	0	0	1	0	0	1	0	0	1	0	0	9	0	975.55	P54071	P54071	141	149	Idh2	Isocitrate dehydrogenase [NADP], mitochondrial	no	no	2	0.022422	87.476			By matching
NLHSEISGK	MRFLNEQKNLHSEISG	LHSEISGKRDKSEEVH	K	N	L	G	K	R	0	0	1	0	0	0	1	1	1	1	1	1	0	0	0	2	0	0	0	0	0	0	9	0	983.504	E9Q557;E9PZW0	E9Q557	944	952	Dsp	Desmoplakin	yes	no	2	0.0029435	101.82			By MS/MS
NMMAACDPR	TQQMFDAKNMMAACDP	MMAACDPRHGRYLTVA	K	N	M	P	R	H	2	1	1	1	1	0	0	0	0	0	0	0	2	0	1	0	0	0	0	0	0	0	9	0	1064.42	B2RSN3;Q9CWF2;Q7TMM9;Q99J49;P68372;Q9D6F9;Q9CVR0;Q9DCR1;Q9CRT0;Q3U9U3;Q3UMM1;Q922F4;Q9CUN8;P99024;Q80ZV2	P68372	298	306	Tubb2b;Tubb2a;Tubb4b;Tubb4a;Tubb3;Tubb6;Tubb5	Tubulin beta-2B chain;Tubulin beta-2A chain;Tubulin beta-4B chain;Tubulin beta-4A chain;Tubulin beta-6 chain;Tubulin beta-5 chain	no	no	2	0.0017578	111.46					By MS/MS
NNFEGEITK	FKKFDEGRNNFEGEIT	NFEGEITKEKLLDFIK	R	N	N	T	K	E	0	0	2	0	0	0	2	1	0	1	0	1	0	1	0	0	1	0	0	0	0	0	9	0	1050.5	Q3UDR2;Q3URP6;Q3U738;Q3TWE3;Q3TIM0;Q3THC3;Q3TF72;P09103;Q3TGS0;Q3UBY9;Q3UJA8;Q3UA23;Q3TT76	Q3UDR2	216	224	P4hb	Protein disulfide-isomerase	yes	no	2	0.001074	117.01			By MS/MS
NSMEKLLQK	TLRNSEMKNSMEKLLQ	SMEKLLQKTLSPSRIR	K	N	S	Q	K	T	0	0	1	0	0	1	1	0	0	0	2	2	1	0	0	1	0	0	0	0	0	0	9	1	1089.59	Q7TQZ4;L7MU51;A2AUA2	Q7TQZ4	294	302	Olfr1249;Olfr1253	Olfactory receptor	yes	no	2	0.024249	65.224					By MS/MS
NSTFSELFK	IALDGDTKNSTFSELF	STFSELFKKEHPDRFI	K	N	S	F	K	K	0	0	1	0	0	0	1	0	0	0	1	1	0	2	0	2	1	0	0	0	0	0	9	0	1071.52	P40142;O55021	P40142	344	352	Tkt	Transketolase	yes	no	2	0.043424	61.161			By matching
NSYLEVLLK	LDTGAAGRNSYLEVLL	SYLEVLLKLADKYKKK	R	N	S	L	K	L	0	0	1	0	0	0	1	0	0	0	3	1	0	0	0	1	0	0	1	1	0	0	9	0	1077.61	Q3THH1;Q922R8;Q3TML0;Q3TJL8;Q9DAB4	Q3THH1	319	327	Pdia6	Protein disulfide-isomerase A6	yes	no	2	0.003773	99.815			By MS/MS		By MS/MS
QDEHGYISR	ITGKHEERQDEHGYIS	DEHGYISRCFTRKYTL	R	Q	D	S	R	C	0	1	0	1	0	1	1	1	1	1	0	0	0	0	0	1	0	0	1	0	0	0	9	0	1103.5	Q9Z2L2;D3YZ06;Q545F4;P14602-3;P14602-2;P14602	Q9Z2L2	51	59	Hspb1	Heat shock protein beta-1	yes	no	3	0.0415	40.331			By MS/MS
QEGLESVLK	NLSDVATKQEGLESVL	EGLESVLKILVNQLSV	K	Q	E	L	K	I	0	0	0	0	0	1	2	1	0	0	2	1	0	0	0	1	0	0	0	1	0	0	9	0	1001.54	Q02257	Q02257	386	394	Jup	Junction plakoglobin	yes	yes	2	0.039193	63.076			By MS/MS
QEVISTSSK	KIIVDELKQEVISTSS	EVISTSSKAEPPQCTS	K	Q	E	S	K	A	0	0	0	0	0	1	1	0	0	1	0	1	0	0	0	3	1	0	0	1	0	0	9	0	977.503	P68040	P68040	272	280	Gnb2l1	Guanine nucleotide-binding protein subunit beta-2-like 1;Guanine nucleotide-binding protein subunit beta-2-like 1, N-terminally processed	yes	yes	2	0.034951	77.533
QLLLTADDR	EENRRFYRQLLLTADD	LLLTADDRVNPCIGGV	R	Q	L	D	R	V	1	1	0	2	0	1	0	0	0	0	3	0	0	0	0	0	1	0	0	0	0	0	9	0	1043.56	Q5FWB7;A6ZI44;P05064;Q6NY00;D3YWI1;Q9CPQ9;A6ZI46;A0A0U1RPN8;D3YV98;A0A0U1RPT5;D3Z510;A6ZI47	Q5FWB7	61	69	Aldoa;Aldoart1;Aldoart2	Fructose-bisphosphate aldolase;Fructose-bisphosphate aldolase A	yes	no	2	0.00095903	118.71			By MS/MS
QTFITSVIK	MVSTSQNRQTFITSVI	TFITSVIKFLRQYGFD	R	Q	T	I	K	F	0	0	0	0	0	1	0	0	0	2	0	1	0	1	0	1	2	0	0	1	0	0	9	0	1035.6	D3Z1S6;Q91XA9	D3Z1S6	57	65	Chia1;Chia	Acidic mammalian chitinase	yes	no	2	0.0031067	93.467		By MS/MS		By MS/MS	By MS/MS
QTVAVGVIK	RFAVRDMRQTVAVGVI	TVAVGVIKAVDKKAAG	R	Q	T	I	K	A	1	0	0	0	0	1	0	1	0	1	0	1	0	0	0	0	1	0	0	3	0	0	9	0	913.56	Q58E64;Q3UA81;P10126;Q3TII3;Q3UZQ3;P62631;Q4FZE5	Q58E64	431	439	Eef1a1;Eef1a2	Elongation factor 1-alpha;Elongation factor 1-alpha 1;Elongation factor 1-alpha 2	yes	no	2	0.041654	53.756			By matching
SCAHDWVYE	PEELIDYKSCAHDWVY	CAHDWVYE________	K	S	C	Y	E	-	1	0	0	1	1	0	1	0	1	0	0	0	0	0	0	1	0	1	1	1	0	0	9	0	1165.45	Q5NC82;E9PZF0;Q01768	Q5NC82	144	152	Nme2;Gm20390	Nucleoside diphosphate kinase;Nucleoside diphosphate kinase B	yes	no	2	0.020007	80.684
SEIDLFNIR	LIRVVVSRSEIDLFNI	EIDLFNIRKEFRKNFA	R	S	E	I	R	K	0	1	1	1	0	0	1	0	0	2	1	0	0	1	0	1	0	0	0	0	0	0	9	0	1105.58	P48036	P48036	275	283	Anxa5	Annexin A5	yes	yes	2	0.00022704	169.44	By MS/MS		By MS/MS		By MS/MS
SGGIPALVR	EGLLAIFKSGGIPALV	GGIPALVRMLSSPVES	K	S	G	V	R	M	1	1	0	0	0	0	0	2	0	1	1	0	0	0	1	1	0	0	0	1	0	0	9	0	868.513	Q02257	Q02257	225	233	Jup	Junction plakoglobin	yes	yes	2	0.0097837	85.676			By MS/MS
SGTSEFLNK	KNLGTIAKSGTSEFLN	GTSEFLNKMTEAQEDG	K	S	G	N	K	M	0	0	1	0	0	0	1	1	0	0	1	1	0	1	0	2	1	0	0	0	0	0	9	0	981.477	Q91V38;Q3UAD6;P08113;Q3UBU0;Q8C2R2	Q91V38	169	177	Hsp90b1	Endoplasmin	yes	no	2	0.0062254	93.938					By MS/MS
SGVSLAALK	AVAASKERSGVSLAAL	GVSLAALKKALAAAGY	R	S	G	L	K	K	2	0	0	0	0	0	0	1	0	0	2	1	0	0	0	2	0	0	0	1	0	0	9	0	844.502	Q5SZA3;Q3U292;Q149Z9;P15864;P43277;P43275	Q5SZA3	55	63	Hist1h1c;Hist1h1d;Hist1h1a	Histone H1.2;Histone H1.3;Histone H1.1	no	no	2	0.0036942	114.89
SITGYYLEK	APEYDGGKSITGYYLE	ITGYYLEKKEKHAVRW	K	S	I	E	K	K	0	0	0	0	0	0	1	1	0	1	1	1	0	0	0	1	1	0	2	0	0	0	9	0	1072.54	E9Q8N1;E9Q8K5;A2ASS6-2;A2ASS6	E9Q8N1	18469	18477	Ttn	Titin	yes	no	3	0.055018	18.978		By MS/MS		By MS/MS
SQLQISNNR	NSTISELRSQLQISNN	QLQISNNRTLELQGLI	R	S	Q	N	R	T	0	1	2	0	0	2	0	0	0	1	1	0	0	0	0	2	0	0	0	0	0	0	9	0	1058.55	E9Q557;Q9CV95	E9Q557	1766	1774	Dsp	Desmoplakin	yes	no	2	0.00074706	104.89			By MS/MS		By matching
SSLNPILFR	KAPTIVGKSSLNPILF	SLNPILFRGVGMVADP	K	S	S	F	R	G	0	1	1	0	0	0	0	0	0	1	2	0	0	1	1	2	0	0	0	0	0	0	9	0	1045.59	Q3UG68;Q3UC51;O54734	Q3UG68	175	183	Ddost	Dolichyl-diphosphooligosaccharide--protein glycosyltransferase 48 kDa subunit	yes	no	2	3.4755e-05	116.37
STFVLDEFK	DPFAHLPKSTFVLDEF	TFVLDEFKRKYSNEDT	K	S	T	F	K	R	0	0	0	1	0	0	1	0	0	0	1	1	0	2	0	1	1	0	0	1	0	0	9	0	1084.54	Q4FZK2;Q9D8N0;Q8R1N8	Q4FZK2	286	294	Eef1g	Elongation factor 1-gamma	yes	no	2	0.023056	70.908			By matching
STVHEILCK	________________	TVHEILCKLSLEGDHS	M	S	T	C	K	L	0	0	0	0	1	0	1	0	1	1	1	1	0	0	0	1	1	0	0	1	0	0	9	0	1085.55	Q542G9;P07356;Q3UCD3;Q9CZI7;B0V2N7;B0V2N8	Q542G9	2	10	Anxa2	Annexin;Annexin A2	yes	no	2	0.00047239	119.68			By MS/MS
TEAYLEAIR	KTDEATGKTEAYLEAI	EAYLEAIRKNIEWLKK	K	T	E	I	R	K	2	1	0	0	0	0	2	0	0	1	1	0	0	0	0	0	1	0	1	0	0	0	9	0	1064.55	P47867;P47867-2	P47867	408	416	Scg3	Secretogranin-3	yes	no	2	0.00023877	146.27	By MS/MS		By MS/MS		By MS/MS
TGIVSGFGR	ESTLMTQKTGIVSGFG	GIVSGFGRTHEKGRQS	K	T	G	G	R	T	0	1	0	0	0	0	0	3	0	1	0	0	0	1	0	1	1	0	0	1	0	0	9	0	892.477	Q4FJS7;Q3TBR2;Q3TDB9;Q3U3V1;O88947	Q4FJS7	355	363	F10	Coagulation factor X;Factor X light chain;Factor X heavy chain;Activated factor Xa heavy chain	yes	no	2	0.0002496	160.56	By MS/MS	By MS/MS		By MS/MS	By matching
TIAPALVSK	QAVEHINKTIAPALVS	IAPALVSKKVNVVEQE	K	T	I	S	K	K	2	0	0	0	0	0	0	0	0	1	1	1	0	0	1	1	1	0	0	1	0	0	9	0	898.549	Q5FW97;P17182;Q8CF78;B1ARR7	Q5FW97	72	80	EG433182;Eno1	Alpha-enolase;Enolase	yes	no	2	0.049102	58.592		By matching		By matching	By matching
TLSDYNIQK	GKQLEDGRTLSDYNIQ	LSDYNIQKESTLHLVL	R	T	L	Q	K	E	0	0	1	1	0	1	0	0	0	1	1	1	0	0	0	1	1	0	1	0	0	0	9	0	1080.55	A5JUZ1;A0A0A6YW67;E9Q9J0;Q66JP1;Q8C2K3;Q642L7;E9Q4P0;E9Q5F6;Q922B0;E9QNP0;Q5SX22;Q3TH47;Q78XY9;Q6NZC5;Q8R0Z9;Q922Z8;Q8VC46;P62984;P62983;P0CG49;P0CG50;B0LAC2;D3YYZ2	A5JUZ1	55	63	Ubc;Gm8797;Uba52;Gm1821;Rps27a;Kxd1;Ubb;Gm5239	Ubiquitin-60S ribosomal protein L40;Ubiquitin;60S ribosomal protein L40;Ubiquitin-40S ribosomal protein S27a;Ubiquitin;40S ribosomal protein S27a;Polyubiquitin-B;Ubiquitin;Polyubiquitin-C;Ubiquitin;Ubiquitin-related 1;Ubiquitin-related 2	yes	no	2	0.0014913	113.62	By MS/MS		By MS/MS
TPEELSAIK	LTEIIASRTPEELSAI	PEELSAIKQVYEEEYG	R	T	P	I	K	Q	1	0	0	0	0	0	2	0	0	1	1	1	0	0	1	1	1	0	0	0	0	0	9	0	986.528	P48036	P48036	116	124	Anxa5	Annexin A5	yes	yes	2	0.011241	84.054					By matching
TVIDYNGER	FFPASADRTVIDYNGE	VIDYNGERTLDGFKKF	R	T	V	E	R	T	0	1	1	1	0	0	1	1	0	1	0	0	0	0	0	0	1	0	1	1	0	0	9	0	1065.51	Q3UDR2;Q3URP6;Q3U738;Q3TWE3;Q3TIM0;Q3THC3;Q3TF72;P09103;Q3TGS0;Q3UBY9;Q3UJA8;Q3UA23;Q3TIQ5;E9Q8G8	Q3UDR2	455	463	P4hb	Protein disulfide-isomerase	yes	no	2	0.0070898	91.867			By matching
TVSWAVTPK	CICGNERKTVSWAVTP	VSWAVTPKSLGEVNFT	K	T	V	P	K	S	1	0	0	0	0	0	0	0	0	0	0	1	0	0	1	1	2	1	0	2	0	0	9	0	987.539	D3YW52;Q61838	D3YW52	867	875	Pzp;A2m	Alpha-2-macroglobulin;Alpha-2-macroglobulin 165 kDa subunit;Alpha-2-macroglobulin 35 kDa subunit	yes	no	2	0.00071181	108.15		By MS/MS	By matching	By MS/MS	By MS/MS
VDGNCTGLR	CDVISGDKVDGNCTGL	DGNCTGLRVNVGSDGK	K	V	D	L	R	V	0	1	1	1	1	0	0	2	0	0	1	0	0	0	0	0	1	0	0	1	0	0	9	0	990.455	Q8C5B4;Q61298;P00688	P00688	470	478	Amy2	Alpha-amylase;Pancreatic alpha-amylase	no	no	2	0.00030393	143.04	By MS/MS	By MS/MS	By MS/MS
VDVSPTSQR	PKDSSGQRVDVSPTSQ	DVSPTSQRLQLLEPFD	R	V	D	Q	R	L	0	1	0	1	0	1	0	0	0	0	0	0	0	0	1	2	1	0	0	2	0	0	9	0	987.499	Q99KI0	Q99KI0	556	564	Aco2	Aconitate hydratase, mitochondrial	yes	yes	2	0.000304	143.03			By matching
VGEFSGANK	QFYKKGQKVGEFSGAN	GEFSGANKEKLEASIT	K	V	G	N	K	E	1	0	1	0	0	0	1	2	0	0	0	1	0	1	0	1	0	0	0	1	0	0	9	0	907.44	P10639	P10639	86	94	Txn	Thioredoxin	yes	yes	2	0.0020836	108.81		By matching			By MS/MS
VIEGSFVYK	VTRYMDFKVIEGSFVY	IEGSFVYKGGKIYKVP	K	V	I	Y	K	G	0	0	0	0	0	0	1	1	0	1	0	1	0	1	0	1	0	0	1	2	0	0	9	0	1040.55	Q3UUX9;Q3TIY6;Q3UC72;Q3UPA3;Q61598-2;Q61598;Q9CZ18	Q3UUX9	104	112	Gdi2	Rab GDP dissociation inhibitor beta	yes	no	2	0.045026	60.436
VIGTTFEGR	NPDLVSKRVIGTTFEG	IGTTFEGRNMYVLKIG	R	V	I	G	R	N	0	1	0	0	0	0	1	2	0	1	0	0	0	1	0	0	2	0	0	1	0	0	9	0	978.513	B2RS76	B2RS76	142	150	Cpb1		yes	yes	2	0.0009479	119.07	By MS/MS		By matching
VLEGMDVVR	GKHVVFGKVLEGMDVV	LEGMDVVRKVESTKTD	K	V	L	V	R	K	0	1	0	1	0	0	1	1	0	0	1	0	1	0	0	0	0	0	0	3	0	0	9	0	1016.53	Q9DCY1;P24369	Q9DCY1	172	180	Ppib	Peptidyl-prolyl cis-trans isomerase;Peptidyl-prolyl cis-trans isomerase B	yes	no	2	0.043582	61.09					By MS/MS
VLLVPGPEK	QEKKNIGKVLLVPGPE	LLVPGPEKET______	K	V	L	E	K	E	0	0	0	0	0	0	1	1	0	0	2	1	0	0	2	0	0	0	0	2	0	0	9	0	950.58	Q5RKP0;Q499X4;Q3TXD3;Q62465;Q3U331	Q5RKP0	391	399	Vat1	Synaptic vesicle membrane protein VAT-1 homolog	yes	no	2	0.043424	61.161
VLTEIIASR	KGAGTDEKVLTEIIAS	LTEIIASRTPEELSAI	K	V	L	S	R	T	1	1	0	0	0	0	1	0	0	2	1	0	0	0	0	1	1	0	0	1	0	0	9	0	1000.59	P48036	P48036	107	115	Anxa5	Annexin A5	yes	yes	2	0.0023207	106.88	By matching		By MS/MS
VNFTVDQIR	________________	NFTVDQIRAIMDKKAN	M	V	N	I	R	A	0	1	1	1	0	1	0	0	0	1	0	0	0	1	0	0	1	0	0	2	0	0	9	0	1090.58	Q8C153;Q3UZ14;Q3UMI7;Q3UDC8;Q3TX47;Q3TWX1;Q3TLB1;Q3TJZ1;P58252;Q8BMA8;Q3TW58;Q3UBL9;Q3TK17	Q8C153	2	10	Eef2	Elongation factor 2	yes	no	2	0.024078	69.915			By MS/MS
VNLAMDVGK	WAEDVDLRVNLAMDVG	NLAMDVGKARGFFKKG	R	V	N	G	K	A	1	0	1	1	0	0	0	1	0	0	1	1	1	0	0	0	0	0	0	2	0	0	9	0	945.495	P52480;P52480-2	P52480	490	498	Pkm	Pyruvate kinase PKM	no	no	2	0.0098319	85.622			By matching
VPDTITEWK	GDGELAVKVPDTITEW	PDTITEWKASAFCLSG	K	V	P	W	K	A	0	0	0	1	0	0	1	0	0	1	0	1	0	0	1	0	2	1	0	1	0	0	9	0	1087.56	D3YW52;Q61838	D3YW52	770	778	Pzp;A2m	Alpha-2-macroglobulin;Alpha-2-macroglobulin 165 kDa subunit;Alpha-2-macroglobulin 35 kDa subunit	yes	no	2	0.00090837	120.33	By MS/MS	By MS/MS	By MS/MS	By MS/MS	By MS/MS
VSFELFADK	ADDEPLGRVSFELFAD	SFELFADKVPKTAENF	R	V	S	D	K	V	1	0	0	1	0	0	1	0	0	0	1	1	0	2	0	1	0	0	0	1	0	0	9	0	1054.53	Q5SVY2;Q3UAJ1;Q3TE63;P17742;V9GXC1;V9GX31	Q5SVY2	20	28	Ppia;Gm12728	Peptidyl-prolyl cis-trans isomerase;Peptidyl-prolyl cis-trans isomerase A;Peptidyl-prolyl cis-trans isomerase A, N-terminally processed	yes	no	2	0.016986	77.662		By matching	By MS/MS	By matching	By MS/MS
VTMQNLNNR	GLLSGNEKVTMQNLNN	TMQNLNNRLASYLDNV	K	V	T	N	R	L	0	1	3	0	0	1	0	0	0	0	1	0	1	0	0	0	1	0	0	1	0	0	9	0	1088.54	A6BLY7	A6BLY7	86	94	Krt28	Keratin, type I cytoskeletal 28	yes	yes	2	0.00056291	171.53	By MS/MS	By MS/MS	By MS/MS	By matching	By matching
VVFIFGPDK	NNMPVTARVVFIFGPD	VFIFGPDKKLKLSILY	R	V	V	D	K	K	0	0	0	1	0	0	0	1	0	1	0	1	0	2	1	0	0	0	0	2	0	0	9	0	1020.56	Q53ZU7;O08709;Q6GT24;D3Z0Y2;Q6A0D0;Q8BPD3	Q53ZU7	133	141	Prdx6	Peroxiredoxin-6	yes	no	2	0.045764	60.102	By matching		By MS/MS
WEYENELSK	YQEEAKRRWEYENELS	EYENELSKVRNSYDEE	R	W	E	S	K	V	0	0	1	0	0	0	3	0	0	0	1	1	0	0	0	1	0	1	1	0	0	0	9	0	1196.54	E9Q557	E9Q557	1354	1362	Dsp	Desmoplakin	yes	yes	2	0.026438	68.847			By MS/MS
WGDACDNCR	XRNSDSDKWGDACDNC	GDACDNCRSKKNDDQK	K	W	G	C	R	S	1	1	1	2	2	0	0	1	0	0	0	0	0	0	0	0	0	1	0	0	0	0	9	0	1152.41	Q8VI54;Q9R0G6;A1A557;A2VCQ0	Q8VI54	342	350	Comp	Cartilage oligomeric matrix protein	yes	no	2	0.054401	59.908
YDDMAACMK	KLAEQAERYDDMAACM	DDMAACMKSVTEQGAE	R	Y	D	M	K	S	2	0	0	2	1	0	0	0	0	0	0	1	2	0	0	0	0	0	1	0	0	0	9	0	1103.41	P63101;D3YXN6;Q8BWN0;D3YXF4	P63101	19	27	Ywhaz	14-3-3 protein zeta/delta	yes	no	2	0.038883	63.216			By MS/MS
YENYELTLK	FKNTASLKYENYELTL	ENYELTLKSDSSGQYE	K	Y	E	L	K	S	0	0	1	0	0	0	2	0	0	0	2	1	0	0	0	0	1	0	2	0	0	0	9	0	1171.58	E9Q1Y3;E9Q414	E9Q1Y3	1530	1538	Apob	Apolipoprotein B-100;Apolipoprotein B-48	yes	no	2	8.3966e-06	140.83		By matching			By MS/MS
YESLTDPSK	SDALDKIRYESLTDPS	ESLTDPSKLDSGKELK	R	Y	E	S	K	L	0	0	0	1	0	0	1	0	0	0	1	1	0	0	1	2	1	0	1	0	0	0	9	0	1038.49	Q80Y52;Q3UIF3;Q3TKA2;P07901;A0PJ91;Q3TKB9;Q8C5U3;Q3TKG0;Q8C2A9;B7ZC50;A2A6A2;B7ZC49;Q71LX8;P11499;D3Z1R1;E9PX27	Q71LX8	56	64	Hsp90aa1;Hsp90ab1	Heat shock protein HSP 90-alpha;Heat shock protein HSP 90-beta	no	no	2	0.00034826	140.83					By MS/MS
YETEINITK	EMSNLRNKYETEINIT	ETEINITKTTIKEISM	K	Y	E	T	K	T	0	0	1	0	0	0	2	0	0	2	0	1	0	0	0	0	2	0	1	0	0	0	9	0	1109.56	E9Q557	E9Q557	1222	1230	Dsp	Desmoplakin	yes	yes	2	0.0045103	98.048			By MS/MS
YRPGTVALR	GGVKKPHRYRPGTVAL	RPGTVALREIRRYQKS	R	Y	R	L	R	E	1	2	0	0	0	0	0	1	0	0	1	0	0	0	1	0	1	0	1	1	0	0	9	1	1031.59	E0CZ27;A1L0U3;F8WI35;A1L0V4;B9EI85;P84244;P84228;P68433;P02301;E0CYN1;E0CYR7	E0CZ27	42	50	H3f3a;Hist1h3e;Hist1h3i;Hist2h3b;Hist1h3b;Hist1h3a;H3f3c	Histone H3;Histone H3.3;Histone H3.2;Histone H3.1;Histone H3.3C	yes	no	2	0.022631	94.409		By matching	By matching	By matching
AAMIVNQLSK	EDPVVVTKAAMIVNQL	MIVNQLSKKEASRRAL	K	A	A	S	K	K	2	0	1	0	0	1	0	0	0	1	1	1	1	0	0	1	0	0	0	1	0	0	10	0	1073.59	Q02257	Q02257	162	171	Jup	Junction plakoglobin	yes	yes	2	0.0012894	108.43			By MS/MS
AGFAGDDAPR	DNGSGMCKAGFAGDDA	FAGDDAPRAVFPSIVG	K	A	G	P	R	A	3	1	0	2	0	0	0	2	0	0	0	0	0	1	1	0	0	0	0	0	0	0	10	0	975.441	Q3UAF7;Q3UAF6;Q3U5R4;B2RRX1;P60710;Q3UAA9;Q3UA89;Q3UGS0;E9Q1F2;E9Q5F4;G3UZ07;A1E281;E9Q606;E9Q2D1;F6WX90;Q4KL81;P63260;Q3TSB7;Q3UD81;G3UYG0;B1ATY1;Q3UBP6	Q3UAF7	19	28	Actb;Actg1;Actc1	Actin, cytoplasmic 1;Actin, cytoplasmic 1, N-terminally processed;Actin, cytoplasmic 2;Actin, cytoplasmic 2, N-terminally processed	no	no	2	3.6108e-06	159.79	By MS/MS	By MS/MS	By MS/MS	By MS/MS	By MS/MS
AGLNSLEAVK	________________	LNSLEAVKRKIQALQQ	M	A	G	V	K	R	2	0	1	0	0	0	1	1	0	0	2	1	0	0	0	1	0	0	0	1	0	0	10	0	1000.56	Q6IRU2	Q6IRU2	2	11	Tpm4	Tropomyosin alpha-4 chain	yes	yes	2	0.0067191	78.488					By MS/MS
AMEAVAAQGK	GDEETVRKAMEAVAAQ	EAVAAQGKVKK_____	K	A	M	G	K	V	4	0	0	0	0	1	1	1	0	0	0	1	1	0	0	0	0	0	0	1	0	0	10	0	974.486	Q3U7Z6;Q9DBJ1;Q6NWV5;Q5NCI4;O70250	Q3U7Z6	242	251	Pgam1;Pgam2	Phosphoglycerate mutase 1;Phosphoglycerate mutase 2	yes	no	2	0.0076332	79.986	By matching	By matching	By MS/MS		By MS/MS
APKKLTQTEK	KNKSENIKAPKKLTQT	KKLTQTEKNPGSR___	K	A	P	E	K	N	1	0	0	0	0	1	1	0	0	0	1	3	0	0	1	0	2	0	0	0	0	0	10	2	1142.67	Q3UN37;B2RVF4;H3BKF1;E9PYM1;E9Q0Z5;D3YWC7	Q3UN37	87	96	Fam47e		yes	no	2	0.0063689	77.894	By MS/MS		By matching
ATLITFLCDR	NNEKHTPRATLITFLC	LITFLCDRDAGVGFPE	R	A	T	D	R	D	1	1	0	1	1	0	0	0	0	1	2	0	0	1	0	0	2	0	0	0	0	0	10	0	1208.62	B9EKB8;B7ZWC4;Q07113	B9EKB8	717	726	Igf2r	Cation-independent mannose-6-phosphate receptor	yes	no	2	1.3325e-08	160.53				By MS/MS
ATSASSHLNK	________________	SASSHLNKGIKQMYMS	M	A	T	N	K	G	2	0	1	0	0	0	0	0	1	0	1	1	0	0	0	3	1	0	0	0	0	0	10	0	1014.51	P15105;D3Z121;D3YVK1	P15105	2	11	Glul	Glutamine synthetase	yes	no	2	5.5455e-07	180.09
AVDSLVPIGR	EPMQTGIKAVDSLVPI	DSLVPIGRGQRELIIG	K	A	V	G	R	G	1	1	0	1	0	0	0	1	0	1	1	0	0	0	1	1	0	0	0	2	0	0	10	0	1025.59	D3Z6F5;Q03265;Q3U452	D3Z6F5	145	154	Atp5a1	ATP synthase subunit alpha;ATP synthase subunit alpha, mitochondrial	yes	no	2	0.00022337	121.73
AVGWNEVEGR	DQLLPNLRAVGWNEVE	GWNEVEGRDAIFKQFH	R	A	V	G	R	D	1	1	1	0	0	0	2	2	0	0	0	0	0	0	0	0	0	1	0	2	0	0	10	0	1115.54	P61458	P61458	22	31	Pcbd1	Pterin-4-alpha-carbinolamine dehydratase	yes	yes	2	0.00015867	125.75			By matching		By MS/MS
CGVGVAYNSK	AMQANNHKCGVGVAYN	VGVAYNSKVGGIRMLD	K	C	G	S	K	V	1	0	1	0	1	0	0	2	0	0	0	1	0	0	0	1	0	0	1	2	0	0	10	0	1053.49	Q32MU0;P63239;Q8BRQ2	Q32MU0	225	234	Pcsk1	Neuroendocrine convertase 1	yes	no	2	0.00011062	128.35					By MS/MS
CNSCLTTNLR	EDFFHCLKCNSCLTTN	SCLTTNLRGKHKCIEN	K	C	N	L	R	G	0	1	2	0	2	0	0	0	0	0	2	0	0	0	0	1	2	0	0	0	0	0	10	0	1237.55	Q8R593	Q8R593	122	131	Rchy1		yes	yes	2	0.0022487	102.07	By matching	By MS/MS		By MS/MS
DALNIETAVK	YTNFDAERDALNIETA	LNIETAVKTKGVDEVT	R	D	A	V	K	T	2	0	1	1	0	0	1	0	0	1	1	1	0	0	0	0	1	0	0	1	0	0	10	0	1072.58	Q542G9;P07356;Q3UCD3;Q9CZI7;B0V2N7;B0V2N8	Q542G9	38	47	Anxa2	Annexin;Annexin A2	yes	no	2	0.016814	73.499			By MS/MS
DALSEDEWMR	SHLAESSRDALSEDEW	LSEDEWMRIILEALRQ	R	D	A	M	R	I	1	1	0	2	0	0	2	0	0	0	1	0	1	0	0	1	0	1	0	0	0	0	10	0	1250.52	Q03517;Q4W8U9	Q03517	105	114	Scg2	Secretogranin-2;Secretoneurin;Manserin	yes	no	2	3.9077e-06	154.85			By MS/MS
DAVTYTEHAK	VFLENVIRDAVTYTEH	VTYTEHAKRKTVTAMD	R	D	A	A	K	R	2	0	0	1	0	0	1	0	1	0	0	1	0	0	0	0	2	0	1	1	0	0	10	0	1133.54	B2RTM0;P62806;Q61667	B2RTM0	69	78	Hist2h4;Hist1h4a	Histone H4	yes	no	2;3	4.1202e-06	154.85	By MS/MS	By MS/MS	By MS/MS		By MS/MS
DFINWLIQTK	ILDNLATRDFINWLIQ	INWLIQTKITDKK___	R	D	F	T	K	I	0	0	1	1	0	1	0	0	0	2	1	1	0	1	0	0	1	1	0	0	0	0	10	0	1276.68	P55095	P55095	166	175	Gcg	Glucagon;Glicentin;Glicentin-related polypeptide;Oxyntomodulin;Glucagon;Glucagon-like peptide 1;Glucagon-like peptide 1(7-37);Glucagon-like peptide 1(7-36);Glucagon-like peptide 2	yes	yes	2	2.3022e-07	192.38	By MS/MS		By MS/MS	By MS/MS	By MS/MS
DFLLQQTMLR	SDPDPSTKDFLLQQTM	LLQQTMLRIKDPKKSL	K	D	F	L	R	I	0	1	0	1	0	2	0	0	0	0	3	0	1	1	0	0	1	0	0	0	0	0	10	0	1263.66	A5GZX3;Q9CPU0	A5GZX3	29	38	Glo1	Lactoylglutathione lyase	yes	no	2	0.00014834	126.39			By matching		By MS/MS
DLEDLQILIK	PFDKWDGKDLEDLQIL	EDLQILIKVKGKCTTD	K	D	L	I	K	V	0	0	0	2	0	1	1	0	0	2	3	1	0	0	0	0	0	0	0	0	0	0	10	0	1198.68	Q99KI0	Q99KI0	578	587	Aco2	Aconitate hydratase, mitochondrial	yes	yes	2	0.0086104	83.499			By matching
DLFDPIIEER	EESYDVFKDLFDPIIE	FDPIIEERHGGYQPSD	K	D	L	E	R	H	0	1	0	2	0	0	2	0	0	2	1	0	0	1	1	0	0	0	0	0	0	0	10	0	1245.62	Q04447	Q04447	87	96	Ckb	Creatine kinase B-type	yes	yes	2	0.00088958	112.13	By matching		By matching		By MS/MS
DLGEELEALK	NKAEKQKRDLGEELEA	GEELEALKTELEDTLD	R	D	L	L	K	T	1	0	0	1	0	0	3	1	0	0	3	1	0	0	0	0	0	0	0	0	0	0	10	0	1115.57	Q8VDD5;Q3UFT0;E9QPE7;Q8R384;Q69ZX3;O08638-2;O08638	Q8VDD5	1136	1145	Myh9;Myh11	Myosin-9;Myosin-11	yes	no	2	0.0096263	82.261			By matching
DMATFLALAK	VIGFFQGKDMATFLAL	ATFLALAKDALDMTFG	K	D	M	A	K	D	3	0	0	1	0	0	0	0	0	0	2	1	1	1	0	0	1	0	0	0	0	0	10	0	1079.57	D3Z6P0-2;D3Z6P0	D3Z6P0-2	186	195	Pdia2	Protein disulfide-isomerase A2	yes	no	2	0.025238	67.704		By matching	By MS/MS
DRPFFPGLVK	KQHYIDLKDRPFFPGL	PFFPGLVKYMNSGPVV	K	D	R	V	K	Y	0	1	0	1	0	0	0	1	0	0	1	1	0	2	2	0	0	0	0	1	0	0	10	1	1174.65	Q5NC82;E9PZF0;Q01768;B0LAA8;Q8R4B4	Q5NC82	57	66	Nme2;Gm20390	Nucleoside diphosphate kinase;Nucleoside diphosphate kinase B	yes	no	2;3	0.028741	86.014	By matching		By MS/MS		By MS/MS
DSTLIMQLLR	TLSEESYKDSTLIMQL	TLIMQLLRDNLTLWTS	K	D	S	L	R	D	0	1	0	1	0	1	0	0	0	1	3	0	1	0	0	1	1	0	0	0	0	0	10	0	1188.65	P63101;Q3UA58;Q5SS40;P62259;Q8BPH1;Q3V453;A8IP69;P61982;A3KML3;F6YY69;F6VW30;P68254-2;P68254;Q9JJ20;O70456;P68510;A2A5N2;Q9CQV8-2;Q9CQV8	Q5SS40	216	225	Ywhaz;Ywhae;Ywhag;Ywhaq;Sfn;Ywhah;Ywhab	14-3-3 protein zeta/delta;14-3-3 protein epsilon;14-3-3 protein gamma;14-3-3 protein gamma, N-terminally processed;14-3-3 protein theta;14-3-3 protein sigma;14-3-3 protein eta;14-3-3 protein beta/alpha;14-3-3 protein beta/alpha, N-terminally processed	no	no	2	3.8044e-06	160.59	By MS/MS	By MS/MS	By MS/MS	By MS/MS	By MS/MS
DVNAAIAAIK	YRGDVVPKDVNAAIAA	NAAIAAIKTKRSIQFV	K	D	V	I	K	T	4	0	1	1	0	0	0	0	0	2	0	1	0	0	0	0	0	0	0	1	0	0	10	0	984.56	A0A0A0MQA5;P68368	A0A0A0MQA5	356	365	Tuba4a	Tubulin alpha-4A chain	yes	no	2	0.0018489	103.26			By matching
DVNAAIATIK	YRGDVVPKDVNAAIAT	NAAIATIKTKRSIQFV	K	D	V	I	K	T	3	0	1	1	0	0	0	0	0	2	0	1	0	0	0	0	1	0	0	1	0	0	10	0	1014.57	P05213;Q99KA2;P68369;Q52L87;Q3TIZ0;P68373;Q5FW91;P05214;Q9D9Y2	P05213	327	336	Tuba1b;Tuba1a;Tuba1c;Tuba3a	Tubulin alpha-1B chain;Tubulin alpha-1A chain;Tubulin alpha-1C chain;Tubulin alpha-3 chain	no	no	2	0.0055218	89.731			By MS/MS		By MS/MS
EADDIVNWLK	PKEYTAGREADDIVNW	DDIVNWLKKRTGPAAT	R	E	A	L	K	K	1	0	1	2	0	0	1	0	0	1	1	1	0	0	0	0	0	1	0	1	0	0	10	0	1201.6	Q3UDR2;Q3URP6;Q3U738;Q3TWE3;Q3TIM0;Q3THC3;Q3TF72;P09103;Q3TGS0;Q3UBY9;Q3UJA8;Q3UA23;Q3TT76	Q3UDR2	123	132	P4hb	Protein disulfide-isomerase	yes	no	2	0.00025646	119.68	By MS/MS	By MS/MS	By MS/MS		By MS/MS
EAQAVAQEWK	TQREVHTREAQAVAQE	QAVAQEWKCAFMETSA	R	E	A	W	K	C	3	0	0	0	0	2	2	0	0	0	0	1	0	0	0	0	0	1	0	1	0	0	10	0	1158.57	Q91Z61	Q91Z61	134	143	Diras1	GTP-binding protein Di-Ras1	yes	yes	2	0.002584	99.815					By MS/MS
EDQTEYLEER	TKVILHLKEDQTEYLE	QTEYLEERRVKEVVKK	K	E	D	E	R	R	0	1	0	1	0	1	4	0	0	0	1	0	0	0	0	0	1	0	1	0	0	0	10	0	1310.56	Q80Y52;Q3UIF3;Q3TKA2;P07901;Q3TJU7;A0PJ91;Q3TKB9;Q8C5U3;Q3TKG0;Q8C2A9;B7ZC50;Q71LX8;P11499	Q71LX8	187	196	Hsp90aa1;Hsp90ab1	Heat shock protein HSP 90-alpha;Heat shock protein HSP 90-beta	no	no	2	4.795e-06	160.81			By MS/MS
EDVGQPQPGR	QWITTQCREDVGQPQP	VGQPQPGRENFQKWLK	R	E	D	G	R	E	0	1	0	1	0	2	1	2	0	0	0	0	0	0	2	0	0	0	0	1	0	0	10	0	1081.52	Q9WVA4;A0A0A6YXG6	Q9WVA4	40	49	Tagln2	Transgelin-2	yes	no	2	0.0036538	96.143			By MS/MS		By MS/MS
EDVLLTLSPC	FCSQETVREDVLLTLS	VLLTLSPC________	R	E	D	P	C	-	0	0	0	1	1	0	1	0	0	0	3	0	0	0	1	1	1	0	0	1	0	0	10	0	1145.56	Q6P8U6	Q6P8U6	456	465	Pnlip	Pancreatic triacylglycerol lipase	yes	yes	2	0.013342	77.732	By matching		By matching
EFEPLLNWMK	ESREATEKEFEPLLNW	EPLLNWMKDKALKDKI	K	E	F	M	K	D	0	0	1	0	0	0	2	0	0	0	2	1	1	1	1	0	0	1	0	0	0	0	10	0	1305.64	Q91V38;Q3UAD6;P08113;Q3UBU0;Q3TUD6;Q8CCY5;F7C312	Q91V38	614	623	Hsp90b1	Endoplasmin	yes	no	2	0.0025252	100.02	By MS/MS				By matching
EGALCEENMR	AGFQWATKEGALCEEN	ALCEENMRGVRFDVHD	K	E	G	M	R	G	1	1	1	0	1	0	3	1	0	0	1	0	1	0	0	0	0	0	0	0	0	0	10	0	1207.5	Q8C153;Q3UZ14;Q3UMI7;Q3UDC8;Q3TX47;Q3TWX1;Q3TLB1;Q3TJZ1;P58252;Q6P9L9;Q8BMA8;Q3TW58;Q3UBL9;Q3TSK4;Q3TPG2;Q99LT6;Q61509	Q8C153	689	698	Eef2	Elongation factor 2	yes	no	2	0.0051625	96.009					By matching
EGGPNNHLLK	RIVYVNEKEGGPNNHL	GPNNHLLKNLKKIVDQ	K	E	G	L	K	N	0	0	2	0	0	0	1	2	1	0	2	1	0	0	1	0	0	0	0	0	0	0	10	0	1077.56	Q543R4;Q00493	Q543R4	204	213	Cpe	Carboxypeptidase E	yes	no	2;3	1.5419e-05	142.92	By MS/MS		By MS/MS		By MS/MS
EHLMLEEELR	SLTENLTKEHLMLEEE	LMLEEELRNLRLEYDD	K	E	H	L	R	N	0	1	0	0	0	0	4	0	1	0	3	0	1	0	0	0	0	0	0	0	0	0	10	0	1297.63	E9Q557;Q9CV95	E9Q557	1728	1737	Dsp	Desmoplakin	yes	no	3	3.7556e-05	129.85	By matching		By MS/MS
EKETLITIMK	IDSEKEAKEKETLITI	ETLITIMKTLIDFVKM	K	E	K	M	K	T	0	0	0	0	0	0	2	0	0	2	1	2	1	0	0	0	2	0	0	0	0	0	10	1	1204.67	P47867;P47867-2	P47867	298	307	Scg3	Secretogranin-3	yes	no	3	0.0081186	72.321			By MS/MS
ELDDCEQANK	SQAANSTKELDDCEQA	DDCEQANKLGAINSTL	K	E	L	N	K	L	1	0	1	2	1	1	2	0	0	0	1	1	0	0	0	0	0	0	0	0	0	0	10	0	1220.5	Q14DR9;Q8R2E9	Q14DR9	126	135	Ero1lb	ERO1-like protein beta	yes	no	2	0.028887	66.19			By MS/MS
EMATQLAFMR	NVEGVSSKEMATQLAF	ATQLAFMRLLANRASQ	K	E	M	M	R	L	2	1	0	0	0	1	1	0	0	0	1	0	2	1	0	0	1	0	0	0	0	0	10	0	1196.57	Q91VL4;Q3TP88;Q3TUE2;Q3TX57;Q3TU64;Q01149	Q91VL4	449	458	Col1a2	Collagen alpha-2(I) chain	yes	no	2	5.4066e-07	185.81		By MS/MS		By MS/MS
EMQDLGGGER	YTNEYCGREMQDLGGG	QDLGGGERTTGFELMD	R	E	M	E	R	T	0	1	0	1	0	1	2	3	0	0	1	0	1	0	0	0	0	0	0	0	0	0	10	0	1090.47	B2RQH0;Q61495;Q7TSF1;Q7TSF0;Q9CUH7	B2RQH0	662	671	Dsg1b;Dsg1a;Dsg1c	Desmoglein-1-alpha;Desmoglein-1-beta;Desmoglein-1-gamma	yes	no	2	0.00014986	126.29			By MS/MS
EVVEEAENGR	TKDLKEKKEVVEEAEN	VEEAENGRDAPANGNA	K	E	V	G	R	D	1	1	1	0	0	0	4	1	0	0	0	0	0	0	0	0	0	0	0	2	0	0	10	0	1130.52	Q3U6E4;Q0VGU2;Q8C2T3;Q3U8X6;Q3UA54;P26350;A0A087WP98;A0A087WPN6;A0A087WQN2;J3QPK6	Q3U6E4	22	31	Ptma;Gm6625	Prothymosin alpha;Prothymosin alpha, N-terminally processed;Thymosin alpha	yes	no	2	0.00020384	121.6			By matching
FDVSGYPTLK	EQTDLAKRFDVSGYPT	VSGYPTLKIFRKGRPF	R	F	D	L	K	I	0	0	0	1	0	0	0	1	0	0	1	1	0	1	1	1	1	0	1	1	0	0	10	0	1125.57	A0A0R4J0Z1;P08003	A0A0R4J0Z1	243	252	Pdia4	Protein disulfide-isomerase A4	yes	no	2	0.0027391	99.283
FEELNADLFR	YTSITRARFEELNADL	ELNADLFRGTLDPVEK	R	F	E	F	R	G	1	1	1	1	0	0	2	0	0	0	2	0	0	2	0	0	0	0	0	0	0	0	10	0	1252.61	Q3UBA6;Q3TZJ3;Q3TH56;Q3TEK2;P63017;Q504P4;Q3U9L2;Q3TF16;Q3TQ13;Q3UDS0;Q3ULM1;Q3TRH3;Q3TB63;Q3KQJ4;Q3TH04;Q3UXU1;B7U582;P17156	Q3UBA6	302	311	Hspa8;Hspa2	Heat shock cognate 71 kDa protein;Heat shock-related 70 kDa protein 2	yes	no	2	1.958e-06	177.06	By MS/MS		By MS/MS		By MS/MS
FEELNMDLFR	SETLTRAKFEELNMDL	ELNMDLFRSTMKPVQK	K	F	E	F	R	S	0	1	1	1	0	0	2	0	0	0	2	0	1	2	0	0	0	0	0	0	0	0	10	0	1312.61	Q3U9G2;Q3TWF2;P20029;Q9DC41;Q3TKF8;Q3TI47;Q3U7T8;Q3U6V3;Q3UEM8;Q3TUS2	Q3U9G2	328	337	Hspa5	78 kDa glucose-regulated protein	yes	no	2	4.1438e-06	155.06	By MS/MS		By MS/MS		By MS/MS
FGGALDAAAK	GLLTIGDRFGGALDAA	GALDAAAKMFSKAFDS	R	F	G	A	K	M	4	0	0	1	0	0	0	2	0	0	1	1	0	1	0	0	0	0	0	0	0	0	10	0	919.476	Q3TED3;Q3V117;Q91V92;Q3UEA1;Q8VDM8;Q3UVY4;Q99K05	Q3TED3	925	934	Acly	ATP-citrate synthase	yes	no	2	0.041356	64.103
FIPLIPIPER	ITKSVFSKFIPLIPIP	PLIPIPERTTKPYPAD	K	F	I	E	R	T	0	1	0	0	0	0	1	0	0	3	1	0	0	1	3	0	0	0	0	0	0	0	10	0	1193.72	P12960	P12960	226	235	Cntn1	Contactin-1	yes	yes	2	0.0036538	96.143	By matching
FLDSGGHLPK	RDLETFSKFLDSGGHL	DSGGHLPKEEPKEPAA	K	F	L	P	K	E	0	0	0	1	0	0	0	2	1	0	2	1	0	1	1	1	0	0	0	0	0	0	10	0	1069.56	D3Z6P0-2;D3Z6P0;F6Q519	D3Z6P0-2	490	499	Pdia2	Protein disulfide-isomerase A2	yes	no	3	0.027731	50.978			By MS/MS
FLMANGQLVK	WNVDLIPKFLMANGQL	MANGQLVKMLLYTEVT	K	F	L	V	K	M	1	0	1	0	0	1	0	1	0	0	2	1	1	1	0	0	0	0	0	1	0	0	10	0	1119.61	P50396;D6RI86;Q3UUX9;Q3TIY6;Q3UC72;Q3UPA3;Q61598-2;Q61598;Q9CZ18	P50396	80	89	Gdi1;Gdi2	Rab GDP dissociation inhibitor alpha;Rab GDP dissociation inhibitor beta	no	no	2	0.0076951	84.615			By matching
FPLMYEENSR	ERKLKHMRFPLMYEEN	LMYEENSRENPFKRTN	R	F	P	S	R	E	0	1	1	0	0	0	2	0	0	0	1	0	1	1	1	1	0	0	1	0	0	0	10	0	1284.58	Q03517;Q4W8U9	Q03517	168	177	Scg2	Secretogranin-2;Secretoneurin;Manserin	yes	no	2	0.011012	105.65			By MS/MS
GEFITTVQQR	LKDDSWLKGEFITTVQ	FITTVQQRGAAVIKAR	K	G	E	Q	R	G	0	1	0	0	0	2	1	1	0	1	0	0	0	1	0	0	2	0	0	1	0	0	10	0	1177.61	P14152	P14152	221	230	Mdh1	Malate dehydrogenase, cytoplasmic	yes	yes	2	0.0070881	85.355			By MS/MS
GEGQLSAAER	YVAKFAAKGEGQLSAA	GQLSAAERAKKVEDMM	K	G	E	E	R	A	2	1	0	0	0	1	2	2	0	0	1	0	0	0	0	1	0	0	0	0	0	0	10	0	1016.49	Q8C153;Q3UZ14;Q3UMI7;Q3UDC8;Q3TX47;Q3TWX1;Q3TLB1;Q3TJZ1;P58252;Q6P9L9;Q8BMA8;Q3TW58;Q3UBL9;Q3TK17;O89069	Q8C153	240	249	Eef2	Elongation factor 2	yes	no	2	9.9975e-05	129.39					By MS/MS
GGPNYQEGLR	EVTIFVRRGGPNYQEG	PNYQEGLRVMGEVGKT	R	G	G	L	R	V	0	1	1	0	0	1	1	3	0	0	1	0	0	0	1	0	0	0	1	0	0	0	10	0	1089.52	Q3TED3;Q3V117;Q91V92;Q3UEA1;Q3TS02	Q3TED3	380	389	Acly	ATP-citrate synthase	yes	no	2	3.8091e-05	133.23					By MS/MS
GHTKVKELAR	SVWTDHKKGHTKVKEL	TKVKELARFKPMQRHL	K	G	H	A	R	F	1	1	0	0	0	0	1	1	1	0	1	2	0	0	0	0	1	0	0	1	0	0	10	2	1137.66	G3UYM8;Q80U26;F6VR53;D3YUF3;D3YUF4;G3UXP9;E9Q863;Q003U3;E9PY13;E9PY12;Q3UHQ9;G3UX72;E9PXE1;E9QPM7;Q6PDM6;E9PXE2;Q64096	G3UYM8	725	734	Mcf2l	Guanine nucleotide exchange factor DBS	yes	no	2	0.010657	75.509		By MS/MS			By MS/MS
GYSFTTTAER	LMKILTERGYSFTTTA	SFTTTAEREIVREIKE	R	G	Y	E	R	E	1	1	0	0	0	0	1	1	0	0	0	0	0	1	0	1	3	0	1	0	0	0	10	0	1131.52	Q3UAF7;Q3UAF6;Q3U5R4;B2RRX1;P60710;Q3UAA9;Q3U939;Q3U804;Q3UGS0;Q61276;Q3TIJ9;Q3UCF8;E9Q1F2;E9Q5F4;G3UZ07;O89054;Q6IWE2;Q4KL81;P63260;Q3TSB7;Q3UD81;Q3UBP6;Q3UBQ4;Q9QZ83	Q3UAF7	197	206	Actb;Actg1	Actin, cytoplasmic 1;Actin, cytoplasmic 1, N-terminally processed;Actin, cytoplasmic 2;Actin, cytoplasmic 2, N-terminally processed	no	no	2	4.3762e-05	132.88	By MS/MS	By MS/MS	By MS/MS	By MS/MS	By MS/MS
HFVVLGEYDR	HCQVTPGRHFVVLGEY	VVLGEYDRSSNAEPVQ	R	H	F	D	R	S	0	1	0	1	0	0	1	1	1	0	1	0	0	1	0	0	0	0	1	2	0	0	10	0	1233.61	Q9ER05;Q9D7P8;Q9D960	Q9ER05	83	92	Ctrl		yes	no	2;3	0.0047039	94.692			By MS/MS
HLLVHAPEDK	LNTGDIKRHLLVHAPE	LVHAPEDKKEVLASFI	R	H	L	D	K	K	1	0	0	1	0	0	1	0	2	0	2	1	0	0	1	0	0	0	0	1	0	0	10	0	1157.62	Q3TED3;Q3V117;Q91V92;Q3UEA1;Q3TS02	Q3TED3	168	177	Acly	ATP-citrate synthase	yes	no	3	0.0049448	79.148					By MS/MS
HLNLSGNKIK	AEKCPNLKHLNLSGNK	NLSGNKIKDLSTIEPL	K	H	L	I	K	D	0	0	2	0	0	0	0	1	1	1	2	2	0	0	0	1	0	0	0	0	0	0	10	1	1122.65	F6UFG6;D3YYE1;D3Z7M9;Q64G17;O35381	F6UFG6	88	97	Anp32a;Anp32c	Putative acidic leucine-rich nuclear phosphoprotein 32 family member C;Acidic leucine-rich nuclear phosphoprotein 32 family member A	yes	no	2	0.0018632	79.148	By MS/MS		By MS/MS
HYGGLTGLNK	RTWRLNERHYGGLTGL	GGLTGLNKAETAAKHG	R	H	Y	N	K	A	0	0	1	0	0	0	0	3	1	0	2	1	0	0	0	0	1	0	1	0	0	0	10	0	1058.55	Q3U7Z6;Q9DBJ1;Q6NWV5;Q5NCI4;O70250	Q3U7Z6	91	100	Pgam1;Pgam2	Phosphoglycerate mutase 1;Phosphoglycerate mutase 2	yes	no	2	4.319e-05	133.23
IDTIEIITDR	DYFEEYGKIDTIEIIT	TIEIITDRQSGKKRGF	K	I	D	D	R	Q	0	1	0	2	0	0	1	0	0	4	0	0	0	0	0	0	2	0	0	0	0	0	10	0	1187.64	A0A0N4SUM2;B7ZP22;O88569-3;O88569-2;O88569	A0A0N4SUM2	37	46	Hnrnpa2b1	Heterogeneous nuclear ribonucleoproteins A2/B1	yes	no	2	9.5117e-06	146.17			By MS/MS		By MS/MS
IETIEVMEDR	DYFEKYGKIETIEVME	TIEVMEDRHKEKERGK	K	I	E	D	R	H	0	1	0	1	0	0	3	0	0	2	0	0	1	0	0	0	1	0	0	1	0	0	10	0	1233.59	E9Q7H5;Q6PFA7;B2RXM2;Q0VG47;J3QNY1;Q8BG05-2;Q6P6I7;A2AL12;Q5FB19;Q3UZG3;Q8BG05;Q5U3M2;Q58E39	E9Q7H5	130	139	Gm8991;Hnrnpa3;Gm6793;Gm9242	Heterogeneous nuclear ribonucleoprotein A3	yes	no	2	0.0012607	108.7			By matching		By matching
IGAEVYHNLK	SSFREAMRIGAEVYHN	AEVYHNLKNVIKEKYG	R	I	G	L	K	N	1	0	1	0	0	0	1	1	1	1	1	1	0	0	0	0	0	0	1	1	0	0	10	0	1142.61	Q5FW97;P17182;Q6PHC1;Q8CF78;B0QZL1	Q5FW97	184	193	EG433182;Eno1	Alpha-enolase;Enolase	yes	no	3	0.0044097	80.755			By MS/MS
IGQQIEMEMK	PESILHERIGQQIEME	QQIEMEMKEELFEGEA	R	I	G	M	K	E	0	0	0	0	0	2	2	1	0	2	0	1	2	0	0	0	0	0	0	0	0	0	10	0	1205.58	A2ASS6-3;F7CR78;E9Q8N1;E9Q8K5;A2ASS6-2;A2ASS6	A2ASS6-3	3404	3413	Ttn	Titin	no	no	2	0.019266	57.032
IIQLLDDYPK	WKSNYFLKIIQLLDDY	QLLDDYPKCFIVGADN	K	I	I	P	K	C	0	0	0	2	0	1	0	0	0	2	2	1	0	0	1	0	0	0	1	0	0	0	10	0	1216.67	Q5M8R8;Q5FWB6;P14869;E9Q070;D3YVM5	Q5M8R8	17	26	Rplp0;Gm8730	60S acidic ribosomal protein P0	yes	no	2	0.0021278	101.38			By matching		By matching
IMLPWDPSGK	GVLGIKVKIMLPWDPS	LPWDPSGKIGPKKPLP	K	I	M	G	K	I	0	0	0	1	0	0	0	1	0	1	1	1	1	0	2	1	0	1	0	0	0	0	10	0	1142.58	Q9D0A2;Q9CZP6;Q5YLW3;Q3UK56;Q3UCL7;P62908	Q9D0A2	188	197	Rps3	40S ribosomal protein S3	yes	no	2	0.0045416	93.096			By matching
IQIGSTFEGR	EHPQLVSKIQIGSTFE	IGSTFEGRPINVLKFS	K	I	Q	G	R	P	0	1	0	0	0	1	1	2	0	2	0	0	0	1	0	1	1	0	0	0	0	0	10	0	1106.57	Q7TPZ8	Q7TPZ8	146	155	Cpa1	Carboxypeptidase A1	yes	yes	2	1.812e-06	177.57	By MS/MS		By MS/MS
IQLINNMLDK	GGAKVADKIQLINNML	LINNMLDKVNEMIIGG	K	I	Q	D	K	V	0	0	2	1	0	1	0	0	0	2	2	1	1	0	0	0	0	0	0	0	0	0	10	0	1200.65	P09411;S4R2M7	P09411	221	230	Pgk1	Phosphoglycerate kinase 1;Phosphoglycerate kinase	yes	no	2	0.0017215	104.43			By matching
ISEDKNPDYR	YAAAVLFRISEDKNPD	EDKNPDYRKRVSVELT	R	I	S	Y	R	K	0	1	1	2	0	0	1	0	0	1	0	1	0	0	1	1	0	0	1	0	0	0	10	1	1235.58	Q02257	Q02257	652	661	Jup	Junction plakoglobin	yes	yes	2;3	0.00045028	121.41			By MS/MS
ISEQFTAMFR	AIQELFKRISEQFTAM	EQFTAMFRRKAFLHWY	R	I	S	F	R	R	1	1	0	0	0	1	1	0	0	1	0	0	1	2	0	1	1	0	0	0	0	0	10	0	1228.59	B2RSN3;Q9CWF2;Q7TMM9;Q99J49;Q62363;P68372;Q9D6F9;Q9DCR1;Q9CRT0;P99024;Q80ZV2	P68372	381	390	Tubb2b;Tubb2a;Tubb4b;Tubb4a;Tubb3;Tubb5	Tubulin beta-2B chain;Tubulin beta-2A chain;Tubulin beta-4B chain;Tubulin beta-4A chain;Tubulin beta-5 chain	no	no	2	0.00015867	125.75					By matching
ISGLIYEETR	ARRGGVKRISGLIYEE	GLIYEETRGVLKVFLE	R	I	S	T	R	G	0	1	0	0	0	0	2	1	0	2	1	0	0	0	0	1	1	0	1	0	0	0	10	0	1179.61	B2RTM0;P62806;Q6B822	B2RTM0	47	56	Hist2h4;Hist1h4a	Histone H4	yes	no	2	1.436e-05	143.5	By MS/MS	By matching	By MS/MS		By MS/MS
ITLDNAYMEK	LKKGATLKITLDNAYM	LDNAYMEKCDENILWL	K	I	T	E	K	C	1	0	1	1	0	0	1	0	0	1	1	1	1	0	0	0	1	0	1	0	0	0	10	0	1196.57	P52480;P52480-2	P52480	142	151	Pkm	Pyruvate kinase PKM	no	no	2	0.0054288	90.05			By matching
ITLITEQLQK	________________	LITEQLQKQTLDELKC	M	I	T	Q	K	Q	0	0	0	0	0	2	1	0	0	2	2	1	0	0	0	0	2	0	0	0	0	0	10	0	1185.7	Q80XL9;Q8BXQ8	Q80XL9	2	11	Fam53c	Protein FAM53C	yes	no	2	0.0020505	101.65		By MS/MS		By MS/MS	By MS/MS
KMATKQLNLK	LLADYQCKKMATKQLN	ATKQLNLKKVLVSGGC	K	K	M	L	K	K	1	0	1	0	0	1	0	0	0	0	2	3	1	0	0	0	1	0	0	0	0	0	10	2	1173.69	A0A087WNN3;Q6ZPR6-2;Q6ZPR6	A0A087WNN3	371	380	Ibtk	Inhibitor of Bruton tyrosine kinase	yes	no	3	0.007025	74.841	By matching
KNEFQGELQK	ERGAVELKKNEFQGEL	EFQGELQKQREQLDRI	K	K	N	Q	K	Q	0	0	1	0	0	2	2	1	0	0	1	2	0	1	0	0	0	0	0	0	0	0	10	1	1219.62	Q4KMM5;Q3UZG0;Q3TIZ8;Q91XA2	Q4KMM5	67	76	Golm1	Golgi membrane protein 1	yes	no	2	2.5312e-17	223.07		By MS/MS		By MS/MS
LACGVIGIAQ	KTGNAGSRLACGVIGI	CGVIGIAQ________	R	L	A	A	Q	-	2	0	0	0	1	1	0	2	0	2	1	0	0	0	0	0	0	0	0	1	0	0	10	0	1000.54	P08228	P08228	145	154	Sod1	Superoxide dismutase [Cu-Zn]	yes	yes	2	0.037262	50.04			By matching
LASDLLEWIR	HLMEDYERLASDLLEW	SDLLEWIRRTIPWLED	R	L	A	I	R	R	1	1	0	1	0	0	1	0	0	1	3	0	0	0	0	1	0	1	0	0	0	0	10	0	1214.67	Q1A602;Q3ULT2;Q3UDJ7;P57780;A1BN54;Q7TPR4;E9Q2W9	Q1A602	301	310	Actn4;Actn1	Alpha-actinin-4;Alpha-actinin-1	yes	no	2	0.00019017	123.79		By matching		By matching	By MS/MS
LASPVTLNAR	NNDIMLIKLASPVTLN	SPVTLNARVATVALPS	K	L	A	A	R	V	2	1	1	0	0	0	0	0	0	0	2	0	0	0	1	1	1	0	0	1	0	0	10	0	1040.6	Q9R0T7;Q9QUK9;Q3V2E0;G3UXD0;Q792Y6;P07146	Q9R0T7	113	122	Try4;Try5;Prss2	Anionic trypsin-2	no	no	2	0.00015509	125.97		By MS/MS	By matching		By matching
LGIHEDSQNR	EQFSKNIKLGIHEDSQ	IHEDSQNRKKLSELLR	K	L	G	N	R	K	0	1	1	1	0	1	1	1	1	1	1	0	0	0	0	1	0	0	0	0	0	0	10	0	1167.56	Q80Y52;Q3UIF3;Q3TKA2;P07901;Q3TJU7;A0PJ91;Q3TKB9;Q8C5U3;Q3TKG0	Q80Y52	448	457	Hsp90aa1	Heat shock protein HSP 90-alpha	yes	no	3	0.034914	45.598			By matching
LGIHEDSTNR	EAFSKNLKLGIHEDST	IHEDSTNRRRLSELLR	K	L	G	N	R	R	0	1	1	1	0	0	1	1	1	1	1	0	0	0	0	1	1	0	0	0	0	0	10	0	1140.55	Q71LX8;P11499;Q80YC2;Q811H6;E9Q0C3	Q71LX8	439	448	Hsp90ab1	Heat shock protein HSP 90-beta	yes	no	3	0.022329	55.353			By matching
LGVIEDHSNR	KEFGTNIKLGVIEDHS	VIEDHSNRTRLAKLLR	K	L	G	N	R	T	0	1	1	1	0	0	1	1	1	1	1	0	0	0	0	1	0	0	0	1	0	0	10	0	1138.57	Q91V38;Q3UAD6;P08113;Q3UBU0;Q3TUD6;Q8CCY5;F7C312	Q91V38	494	503	Hsp90b1	Endoplasmin	yes	no	3	0.00025653	114.51	By MS/MS				By MS/MS
LITLEEEMTK	KEECPAVRLITLEEEM	TLEEEMTKYKPESDEL	R	L	I	T	K	Y	0	0	0	0	0	0	3	0	0	1	2	1	1	0	0	0	2	0	0	0	0	0	10	0	1205.62	Q3UDR2;Q3URP6;Q3U738;Q3TWE3;Q3TIM0;Q3THC3;Q3TF72;P09103;Q3TGS0;Q3UBY9;Q3TT76	Q3UDR2	319	328	P4hb	Protein disulfide-isomerase	yes	no	2	7.427e-05	130.98	By MS/MS	By matching	By MS/MS	By MS/MS	By MS/MS
LLEPVLLLGK	EPRTLQYKLLEPVLLL	EPVLLLGKERFAGVDI	K	L	L	G	K	E	0	0	0	0	0	0	1	1	0	0	5	1	0	0	1	0	0	0	0	1	0	0	10	0	1093.71	A4FUS1;Q641N3;Q5CZY9;P14131	A4FUS1	51	60	Rps16	40S ribosomal protein S16	yes	no	2	0.0011561	109.66	By matching		By MS/MS
LMQLNLCNNR	KTLSKMEKLMQLNLCN	QLNLCNNRLESMPLGL	K	L	M	N	R	L	0	1	3	0	1	1	0	0	0	0	3	0	1	0	0	0	0	0	0	0	0	0	10	0	1274.62	Q501L5;O35103	Q501L5	214	223	Omd	Osteomodulin	yes	no	2	0.027977	66.568
LNYGIPAIVK	EMAQNSVRLNYGIPAI	YGIPAIVKLLNQPNQW	R	L	N	V	K	L	1	0	1	0	0	0	0	1	0	2	1	1	0	0	1	0	0	0	1	1	0	0	10	0	1086.64	Q02257	Q02257	478	487	Jup	Junction plakoglobin	yes	yes	2	0.019233	70.552			By MS/MS
LQSLTENLTK	ESKIEIERLQSLTENL	SLTENLTKEHLMLEEE	R	L	Q	T	K	E	0	0	1	0	0	1	1	0	0	0	3	1	0	0	0	1	2	0	0	0	0	0	10	0	1145.63	E9Q557;Q9CV95	E9Q557	1718	1727	Dsp	Desmoplakin	yes	no	2	9.8438e-06	145.99			By MS/MS
LSTNGPLPDK	CYISGWGRLSTNGPLP	TNGPLPDKLQQALLPV	R	L	S	D	K	L	0	0	1	1	0	0	0	1	0	0	2	1	0	0	2	1	1	0	0	0	0	0	10	0	1040.55	Q9CQ52	Q9CQ52	164	173	Cela3b	Chymotrypsin-like elastase family member 3B	yes	yes	2	0.031082	76.843			By MS/MS
LTLSALLDGK	QTLKPGIKLTLSALLD	LSALLDGKNVNAGGHK	K	L	T	G	K	N	1	0	0	1	0	0	0	1	0	0	4	1	0	0	0	1	1	0	0	0	0	0	10	0	1029.61	Q3U6K8;Q3TIG8;Q3THL7;Q60932-2;Q60932	Q3U6K8	257	266	Vdac1	Voltage-dependent anion-selective channel protein 1	yes	no	2	0.015965	81.017
LTYEIEDEKR	ELNEKITRLTYEIEDE	YEIEDEKRRRKTVEDR	R	L	T	K	R	R	0	1	0	1	0	0	3	0	0	1	1	1	0	0	0	0	1	0	1	0	0	0	10	1	1294.64	E9Q557;E9PZW0	E9Q557	1126	1135	Dsp	Desmoplakin	yes	no	3	0.00081965	102.06		By matching	By MS/MS	By matching	By matching
MPTLGLGTWK	LELNNGTKMPTLGLGT	TLGLGTWKSPPGQVTE	K	M	P	W	K	S	0	0	0	0	0	0	0	2	0	0	2	1	1	0	1	0	2	1	0	0	0	0	10	0	1102.58	Q3TCL2;Q5U415;Q3UDY1;P45376;D3YVJ7;Q3ULP0	Q3TCL2	13	22	Akr1b3;Akr1b1	Aldose reductase	yes	no	2	0.0049921	91.549			By matching
NQVSLTCLVK	PSQEEMTKNQVSLTCL	VSLTCLVKGFYPSDIA	K	N	Q	V	K	G	0	0	1	0	1	1	0	0	0	0	2	1	0	0	0	1	1	0	0	2	0	0	10	0	1160.62	A0A097PUG1;A0A097PUH2	A0A097PUG1	380	389			yes	no	2	0.015713	74.841
PLTTVDFHVK	PDSATQVKPLTTVDFH	TTVDFHVKAEDVVDVE	K	P	L	V	K	A	0	0	0	1	0	0	0	0	1	0	1	1	0	1	1	0	2	0	0	2	0	0	10	0	1155.63	B2RS76	B2RS76	61	70	Cpb1		yes	yes	3	0.038797	42.689			By MS/MS
PPKGTRQPNK	AVYKPPLKPPKGTRQP	KGTRQPNKPRVRPTSR	K	P	P	N	K	P	0	1	1	0	0	1	0	1	0	0	0	2	0	0	3	0	1	0	0	0	0	0	10	2	1121.63	Q69ZV6;Q810B7-2;Q810B7	Q69ZV6	212	221	Slitrk5	SLIT and NTRK-like protein 5	yes	no	2	0.0094302	79.489	By MS/MS
QAGPASVPLR	GIVSHLKKQAGPASVP	GPASVPLRTEEEFKKF	K	Q	A	L	R	T	2	1	0	0	0	1	0	1	0	0	1	0	0	0	2	1	0	0	0	1	0	0	10	0	994.556	P27773	P27773	131	140	Pdia3	Protein disulfide-isomerase A3	yes	yes	2	0.05054	57.204			By matching
QEEEEEEEER	KGRELEHKQEEEEEEE	EEEEEEERLSREWEDK	K	Q	E	E	R	L	0	1	0	0	0	1	8	0	0	0	0	0	0	0	0	0	0	0	0	0	0	0	10	0	1334.51	P26339;Q3UN28	P26339	339	348	Chga	Chromogranin-A;Pancreastatin;Beta-granin;WE-14;Catestatin;GE-25;Serpinin-RRG;Serpinin;p-Glu serpinin precursor	yes	no	2	0.01174	86.014			By MS/MS
QEMQEVQSSR	EVRKALSRQEMQEVQS	MQEVQSSRSGYDNYGG	R	Q	E	S	R	S	0	1	0	0	0	3	2	0	0	0	0	0	1	0	0	2	0	0	0	1	0	0	10	0	1220.55	A0A0N4SUM2;B7ZP22;O88569-3;O88569-2;O88569	A0A0N4SUM2	90	99	Hnrnpa2b1	Heterogeneous nuclear ribonucleoproteins A2/B1	yes	no	2	1.9841e-05	140.49					By MS/MS
QIDLSTVDLK	ICELKYDKQIDLSTVD	DLSTVDLKKLRVKELK	K	Q	I	L	K	K	0	0	0	2	0	1	0	0	0	1	2	1	0	0	0	1	1	0	0	1	0	0	10	0	1130.62	Q80ZP8;A8C1V1;Q3TMX5	Q80ZP8	107	116	Manf		yes	no	2	0.0027391	99.283					By MS/MS
QRTLTTLLEK	SGTGEEGKQRTLTTLL	TLTTLLEKVEGCRDLL	K	Q	R	E	K	V	0	1	0	0	0	1	1	0	0	0	3	1	0	0	0	0	3	0	0	0	0	0	10	1	1201.7	Q6PGF7	Q6PGF7	150	159	Exoc8	Exocyst complex component 8	yes	yes	2	0.0020902	91.549			By MS/MS	By MS/MS	By MS/MS
RCSMTGQPVR	ATLSEYSRRCSMTGQP	SMTGQPVRNWRTPALC	R	R	C	V	R	N	0	2	0	0	1	1	0	1	0	0	0	0	1	0	1	1	1	0	0	1	0	0	10	1	1190.56	Q0VAV1;Q80Z18;F8WIM6;A0A087WR59;Q80T03	Q0VAV1	281	290	Muc6	Mucin-6	yes	no	2	0.022197	53.756
SADTLWGIQK	EEEARLKKSADTLWGI	DTLWGIQKEL______	K	S	A	Q	K	E	1	0	0	1	0	1	0	1	0	1	1	1	0	0	0	1	1	1	0	0	0	0	10	0	1117.58	Q3UDU4;Q564E2;Q3TI99;Q3TCI7;G5E8N5;P06151;Q99K20;Q3THB4;Q3UIC3	Q3UDU4	319	328	Ldha	L-lactate dehydrogenase;L-lactate dehydrogenase A chain	yes	no	2	0.00017419	123.75			By MS/MS	By MS/MS	By MS/MS
SGEIEPVSVK	VGSGGKGKSGEIEPVS	EIEPVSVKVGDKVLLP	K	S	G	V	K	V	0	0	0	0	0	0	2	1	0	1	0	1	0	0	1	2	0	0	0	2	0	0	10	0	1043.55	Q4KL76;Q64433;Q9JI95	Q4KL76	57	66	Hspe1;Cpn10-rs1	10 kDa heat shock protein, mitochondrial	yes	no	2	0.013276	84.198			By matching
SLNNQIESIR	VEVDATLKSLNNQIES	NNQIESIRSPDGSRKN	K	S	L	I	R	S	0	1	2	0	0	1	1	0	0	2	1	0	0	0	0	2	0	0	0	0	0	0	10	0	1172.61	P28481-2;P28481-7;P28481-6;P28481-5;P28481-4;P28481-1;P28481	P28481-2	1164	1173	Col2a1	Collagen alpha-1(II) chain;Collagen alpha-1(II) chain;Chondrocalcin	yes	no	2	0.00028378	117.99
SLSQQIENIR	LEVDTTLKSLSQQIEN	SQQIENIRSPEGSRKN	K	S	L	I	R	S	0	1	1	0	0	2	1	0	0	2	1	0	0	0	0	2	0	0	0	0	0	0	10	0	1186.63	Q99LL6;P11087-2;P11087;Q60785	Q99LL6	362	371	Col1a1	Collagen alpha-1(I) chain	yes	no	2	0.005402	90.142				By MS/MS	By matching
SNAQGIDLNR	LKDWFVGRSNAQGIDL	AQGIDLNRNFPDLDRI	R	S	N	N	R	N	1	1	2	1	0	1	0	1	0	1	1	0	0	0	0	1	0	0	0	0	0	0	10	0	1086.54	Q543R4;Q00493	Q543R4	180	189	Cpe	Carboxypeptidase E	yes	no	2	4.2803e-06	164.97	By MS/MS		By MS/MS	By MS/MS	By MS/MS
STTTGHLIYK	IGHVDSGKSTTTGHLI	TTGHLIYKCGGIDKRT	K	S	T	Y	K	C	0	0	0	0	0	0	0	1	1	1	1	1	0	0	0	1	3	0	1	0	0	0	10	0	1119.59	Q58E64;Q3UA81;P10126;Q3TII3;Q3UZQ3;D3YZ68;P62631;D3Z3I8	Q58E64	21	30	Eef1a1;Eef1a2	Elongation factor 1-alpha;Elongation factor 1-alpha 1;Elongation factor 1-alpha 2	yes	no	2;3	4.5117e-07	139.38		By matching	By MS/MS	By MS/MS	By matching
TADGIVSHLK	AGAYDGPRTADGIVSH	DGIVSHLKKQAGPASV	R	T	A	L	K	K	1	0	0	1	0	0	0	1	1	1	1	1	0	0	0	1	1	0	0	1	0	0	10	0	1039.57	P27773	P27773	120	129	Pdia3	Protein disulfide-isomerase A3	yes	yes	2	0.0025697	99.864
TAEGIAEWLR	PEEYAGPKTAEGIAEW	EGIAEWLRRRVGPSAT	K	T	A	L	R	R	2	1	0	0	0	0	2	1	0	1	1	0	0	0	0	0	1	1	0	0	0	0	10	0	1144.59	D3Z6P0-2;D3Z6P0;F6S5U2	D3Z6P0-2	142	151	Pdia2	Protein disulfide-isomerase A2	yes	no	2	0.00025891	119.53			By MS/MS
TAIVHLFEWR	DPHTSDGRTAIVHLFE	IVHLFEWRWVDIAKEC	R	T	A	W	R	W	1	1	0	0	0	0	1	0	1	1	1	0	0	1	0	0	1	1	0	1	0	0	10	0	1270.68	Q8C5B4;E9PV85;Q61297;P00688	P00688	26	35	Amy2a1;Amy2	Alpha-amylase;Pancreatic alpha-amylase	no	no	3	7.6133e-05	123.96	By MS/MS	By MS/MS	By MS/MS
TIAQDYGVLK	PLISDPKRTIAQDYGV	AQDYGVLKADEGISFR	R	T	I	L	K	A	1	0	0	1	0	1	0	1	0	1	1	1	0	0	0	0	1	0	1	1	0	0	10	0	1106.6	P35700;B1AXW5;B1AXW6;Q3U9J9;B1AXW4	P35700	111	120	Prdx1	Peroxiredoxin-1	yes	no	2	0.0018489	103.26			By MS/MS		By MS/MS
TLGGLEMELR	IRGVGFDRTLGGLEME	GGLEMELRLREHLAKL	R	T	L	L	R	L	0	1	0	0	0	0	2	2	0	0	3	0	1	0	0	0	1	0	0	0	0	0	10	0	1117.58	Q9JKR6;Q8VCI2;F6TRP3	Q9JKR6	269	278	Hyou1	Hypoxia up-regulated protein 1	yes	no	2	0.0027391	99.283
TNQELQEINR	LIEIICSRTNQELQEI	QELQEINRVYKEMYKT	R	T	N	N	R	V	0	1	2	0	0	2	2	0	0	1	1	0	0	0	0	0	1	0	0	0	0	0	10	0	1243.62	Q542G9;P07356;Q9CZI7;B0V2N7;B0V2N8;Q99KH3;B0V2N5	Q542G9	136	145	Anxa2	Annexin;Annexin A2	yes	no	2	1.4543e-09	187.99	By MS/MS		By MS/MS
VAFPLEVVQK	RNTTYCSKVAFPLEVV	FPLEVVQKDSCFNSAM	K	V	A	Q	K	D	1	0	0	0	0	1	1	0	0	0	1	1	0	1	1	0	0	0	0	3	0	0	10	0	1128.65	G3UY13;Q3UEL3;E9Q6I2;Q3V2X3;Q3UVZ1;Q61730-2;Q61730;Q61730-3	G3UY13	125	134	Il1rap	Interleukin-1 receptor accessory protein	yes	no	2	0.00064399	114.4	By MS/MS	By MS/MS	By matching	By MS/MS	By MS/MS
VAWIPDVESR	SRANQIPKVAWIPDVE	WIPDVESRQAPYENLN	K	V	A	S	R	Q	1	1	0	1	0	0	1	0	0	1	0	0	0	0	1	1	0	1	0	2	0	0	10	0	1170.6	Q03517;Q4W8U9	Q03517	483	492	Scg2	Secretogranin-2;Secretoneurin;Manserin	yes	no	2	0.00022546	121.6			By matching
VDATADYICK	YILDLAAKVDATADYI	ATADYICKVKWGDIEF	K	V	D	C	K	V	2	0	0	2	1	0	0	0	0	1	0	1	0	0	0	0	1	0	1	1	0	0	10	0	1154.53	Q3TED3;Q3V117;Q91V92;Q3UEA1;Q3TS02	Q3TED3	221	230	Acly	ATP-citrate synthase	yes	no	2	0.0052025	90.827		By matching		By matching	By MS/MS
VGENADSQIK	KYIKSHYKVGENADSQ	ENADSQIKLSIKRLVT	K	V	G	I	K	L	1	0	1	1	0	1	1	1	0	1	0	1	0	0	0	1	0	0	0	1	0	0	10	0	1059.52	Q8C1Y3;Q3U4Y0;P10922	Q8C1Y3	60	69	H1f0	Histone H1.0;Histone H1.0, N-terminally processed	yes	no	2	0.0038406	82.417			By MS/MS
VITAFNEGLK	KVKAHGKKVITAFNEG	TAFNEGLKNLDNLKGT	K	V	I	L	K	N	1	0	1	0	0	0	1	1	0	1	1	1	0	1	0	0	1	0	0	1	0	0	10	0	1090.6	Q54AH9;Q549D9;A8DV59;A8DV41;P02089;Q9QUN8;D0U293	Q54AH9	67	76	Hbb-b2;Hbbt2	Hemoglobin subunit beta-2	yes	no	2	0.0032787	83.862			By MS/MS
VITNKAVKGK	AELRANGKVITNKAVK	TNKAVKGKYKFLQKYY	K	V	I	G	K	Y	1	0	1	0	0	0	0	1	0	1	0	3	0	0	0	0	1	0	0	2	0	0	10	2	1056.67	Q9CQU1	Q9CQU1	325	334	Mfap1	Microfibrillar-associated protein 1	yes	yes	2	0.0061378	87.806
VLITTDLLAR	EFRSGSSRVLITTDLL	ITTDLLARGIDVQQVS	R	V	L	A	R	G	1	1	0	1	0	0	0	0	0	1	3	0	0	0	0	0	2	0	0	1	0	0	10	0	1113.68	Q3TLL6;Q4FZL1;Q5F2A7;Q3UXC2;Q3TGK7;Q3TFG3;P60843;Q3U8I0;Q8BTU6;Q52KC1;P10630;P10630-2;E9Q561	Q3TLL6	325	334	Eif4a1;Eif4a2	Eukaryotic initiation factor 4A-I;Eukaryotic initiation factor 4A-II;Eukaryotic initiation factor 4A-II, N-terminally processed	yes	no	2	0.0035958	96.342	By matching		By MS/MS
VLLPEYGGTK	VSVKVGDKVLLPEYGG	LPEYGGTKVVLDDKDY	K	V	L	T	K	V	0	0	0	0	0	0	1	2	0	0	2	1	0	0	1	0	1	0	1	1	0	0	10	0	1075.59	Q4KL76;Q64433;Q9JI95	Q4KL76	71	80	Hspe1;Cpn10-rs1	10 kDa heat shock protein, mitochondrial	yes	no	2	0.001928	102.52			By matching
VPFPTIQSVK	AGLPIDVRVPFPTIQS	FPTIQSVKAFLEYHDI	R	V	P	V	K	A	0	0	0	0	0	1	0	0	0	1	0	1	0	1	2	1	1	0	0	2	0	0	10	0	1114.64	Q7TPZ8	Q7TPZ8	67	76	Cpa1	Carboxypeptidase A1	yes	yes	2	0.0055218	89.731	By matching		By MS/MS
VSNAPGVQIR	VYNHSSGRVSNAPGVQ	NAPGVQIRVPGFGKTE	R	V	S	I	R	V	1	1	1	0	0	1	0	1	0	1	0	0	0	0	1	1	0	0	0	2	0	0	10	0	1039.58	Q791M3;Q9CW47;P16301	Q791M3	114	123	Lcat	Phosphatidylcholine-sterol acyltransferase	yes	no	2	3.2458e-07	166.34		By MS/MS		By MS/MS
VVDLLAPYAK	EILVTGIKVVDLLAPY	DLLAPYAKGGKIGLFG	K	V	V	A	K	G	2	0	0	1	0	0	0	0	0	0	2	1	0	0	1	0	0	0	1	2	0	0	10	0	1087.63	P56480	P56480	189	198	Atp5b	ATP synthase subunit beta, mitochondrial	yes	yes	2	0.0063472	86.898	By matching		By matching
VVIVDPETNK	KNTLRKRRVVIVDPET	IVDPETNKEMSVQEAY	R	V	V	N	K	E	0	0	1	1	0	0	1	0	0	1	0	1	0	0	1	0	1	0	0	3	0	0	10	0	1112.61	E9Q557;E9PZW0	E9Q557	2478	2487	Dsp	Desmoplakin	yes	no	2	0.00023731	104.22	By MS/MS		By MS/MS
VYEGERPLTK	NQPTVTIKVYEGERPL	EGERPLTKDNHLLGTF	K	V	Y	T	K	D	0	1	0	0	0	0	2	1	0	0	1	1	0	0	1	0	1	0	1	1	0	0	10	1	1190.63	Q3U9G2;Q3TWF2;P20029;Q9DC41;Q3TKF8;Q3TI47;Q3U7T8;Q3U6V3;Q3UEM8;Q3TUS2	Q3U9G2	466	475	Hspa5	78 kDa glucose-regulated protein	yes	no	2;3	6.5745e-05	144.55	By MS/MS	By MS/MS	By MS/MS		By MS/MS
YGVSGYPTLK	ANTNTCNKYGVSGYPT	VSGYPTLKIFRDGEEA	K	Y	G	L	K	I	0	0	0	0	0	0	0	2	0	0	1	1	0	0	1	1	1	0	2	1	0	0	10	0	1083.56	P27773;F6Q404	P27773	95	104	Pdia3	Protein disulfide-isomerase A3	yes	no	2	0.001915	108.47			By MS/MS		By MS/MS
ADAHSMELEEK	KKDESVARADAHSMEL	HSMELEEKTHSREQSS	R	A	D	E	K	T	2	0	0	1	0	0	3	0	1	0	1	1	1	0	0	1	0	0	0	0	0	0	11	0	1258.55	Q3UZU8;Q3TY66;P16014;Q8BP91;Q3UZP2	Q3UZU8	215	225	Chgb	Secretogranin-1;CCB peptide;PE-11	yes	no	2	5.0356e-08	158.35					By matching
AGEQDASIHLK	YVCIAENKAGEQDASI	QDASIHLKVFAKPKIT	K	A	G	L	K	V	2	0	0	1	0	1	1	1	1	1	1	1	0	0	0	1	0	0	0	0	0	0	11	0	1167.59	A0A0A6YWU2;E9Q589;A0A0A6YY47;E9QB01;P13595-4;P13595-3;P13595-2;P13595;A0A0A6YY91	A0A0A6YWU2	294	304	Ncam1	Neural cell adhesion molecule 1	yes	no	2	0.015049	72.817					By MS/MS
ALAAAGYDVEK	VSLAALKKALAAAGYD	AAGYDVEKNNSRIKLG	K	A	L	E	K	N	4	0	0	1	0	0	1	1	0	0	1	1	0	0	0	0	0	0	1	1	0	0	11	0	1106.56	Q5SZA3;Q3U292;Q149Z9;P15864;P43277;I7HFT9;Q07133	Q5SZA3	65	75	Hist1h1c;Hist1h1d;Hist1h1t	Histone H1.2;Histone H1.3;Histone H1t	no	no	2	0.006806	83.045			By matching
ALANSLACQGK	AQEEYIKRALANSLAC	NSLACQGKYTPSGQSG	R	A	L	G	K	Y	3	0	1	0	1	1	0	1	0	0	2	1	0	0	0	1	0	0	0	0	0	0	11	0	1131.57	Q5FWB7;A6ZI44;P05064;Q6NY00;Q9CPQ9;A6ZI46	Q5FWB7	332	342	Aldoa;Aldoart1	Fructose-bisphosphate aldolase;Fructose-bisphosphate aldolase A	yes	no	2	2.039e-09	167.67		By matching	By MS/MS	By MS/MS
ALASQLQDSLK	EGESPQARALASQLQD	SQLQDSLKDLKAQMQE	R	A	L	L	K	D	2	0	0	1	0	2	0	0	0	0	3	1	0	0	0	2	0	0	0	0	0	0	11	0	1172.64	Q64727	Q64727	571	581	Vcl	Vinculin	yes	yes	2	0.012103	80.834		By MS/MS
ALDFAVSEYNK	ANEEGVRRALDFAVSE	FAVSEYNKGSNDAYHS	R	A	L	N	K	G	2	0	1	1	0	0	1	0	0	0	1	1	0	1	0	1	0	0	1	1	0	0	11	0	1255.61	Q3U5K7;Q9EPX9;P21460;A2APX3	Q3U5K7	46	56	Cst3	Cystatin-C	yes	no	2	6.2028e-08	149.33			By MS/MS
ALLEVVQSGGK	LTIKLVIKALLEVVQS	EVVQSGGKNIELAVMR	K	A	L	G	K	N	1	0	0	0	0	1	1	2	0	0	2	1	0	0	0	1	0	0	0	2	0	0	11	0	1099.62	Q542H2;Q3UIT9;Q3TN31;Q9Z2U0;Q3THL2;Q8VEB8;B7ZMS3;Q9CWH6	Q542H2	194	204	Psma7;Psma8	Proteasome subunit alpha type;Proteasome subunit alpha type-7;Proteasome subunit alpha type-7-like	yes	no	2	0.0029566	93.345			By matching
ATAVMPDGQFK	GYPAPNFKATAVMPDG	VMPDGQFKDISLSEYK	K	A	T	F	K	D	2	0	0	1	0	1	0	1	0	0	0	1	1	1	1	0	1	0	0	1	0	0	11	0	1163.56	P35700;B1AXW5;B1AXW6;Q3U9J9;B1AXW4	P35700	17	27	Prdx1	Peroxiredoxin-1	yes	no	2	0.0011182	103.08			By MS/MS
AVAIDLPGLGR	RLAEAGYRAVAIDLPG	IDLPGLGRSKEAAAPA	R	A	V	G	R	S	2	1	0	1	0	0	0	2	0	1	2	0	0	0	1	0	0	0	0	1	0	0	11	0	1080.63	A0A087WP24;A0A087WRJ2;A0A087WPF8;A0A087WQN8;A0A087WSR2;E9QN99;Q8VCR7	A0A087WP24	64	74	Abhd14b	Alpha/beta hydrolase domain-containing protein 14B	yes	no	2	0.0015806	99.973	By matching	By matching		By matching	By matching
AVFPSIVGRPR	FAGDDAPRAVFPSIVG	PSIVGRPRHQGVMVGM	R	A	V	P	R	H	1	2	0	0	0	0	0	1	0	1	0	0	0	1	2	1	0	0	0	2	0	0	11	1	1197.7	Q3UAF7;Q3UAF6;Q3U5R4;B2RRX1;P60710;Q3UAA9;Q3UA89;Q3U939;Q3U804;Q3UGS0;Q3TIJ9;E9Q1F2;E9Q5F4;G3UZ07;A1E281;E9Q606;E9Q2D1;F6WX90;Q7M0E4;Q4KL81;P63260;Q3TSB7;Q3UD81;G3UYG0;B1ATY1;Q3UBP6;Q3UBQ4	Q3UAF7	29	39	Actb;Actg1;Actc1	Actin, cytoplasmic 1;Actin, cytoplasmic 1, N-terminally processed;Actin, cytoplasmic 2;Actin, cytoplasmic 2, N-terminally processed	no	no	2;3	3.8682e-05	128.81		By MS/MS		By MS/MS	By MS/MS
CCSGAIIVLTK	GAVEASFKCCSGAIIV	GAIIVLTKSGRSAHQV	K	C	C	T	K	S	1	0	0	0	2	0	0	1	0	2	1	1	0	0	0	1	1	0	0	1	0	0	11	0	1220.63	P52480	P52480	423	433	Pkm	Pyruvate kinase PKM	yes	yes	2	0.0040619	88.021			By matching
CDENILWLDYK	LDNAYMEKCDENILWL	NILWLDYKNICKVVEV	K	C	D	Y	K	N	0	0	1	2	1	0	1	0	0	1	2	1	0	0	0	0	0	1	1	0	0	0	11	0	1467.67	P52480;P52480-2	P52480	152	162	Pkm	Pyruvate kinase PKM	no	no	2	8.6795e-05	125.54	By matching		By MS/MS		By matching
CEGFVCAQTGR	QPCRSQVRCEGFVCAQ	FVCAQTGRCVNRRLLC	R	C	E	G	R	C	1	1	0	0	2	1	1	2	0	0	0	0	0	1	0	0	1	0	0	1	0	0	11	0	1283.54	Q8BH35-2;Q8BH35	Q8BH35-2	121	131	C8b	Complement component C8 beta chain	yes	no	2	1.3695e-09	172.61				By MS/MS
DCHVEPCPESK	EDGHCSIKDCHVEPCP	VEPCPESKIPVGIKAG	K	D	C	S	K	I	0	0	0	1	2	0	2	0	1	0	0	1	0	0	2	1	0	0	0	1	0	0	11	0	1356.54	Q14DR9;Q8R2E9	Q14DR9	94	104	Ero1lb	ERO1-like protein beta	yes	no	2;3	0.00029929	115.65	By matching		By MS/MS		By MS/MS
DCSGVSLHLTR	SAFRDNHKDCSGVSLH	GVSLHLTRVPQPLIAG	K	D	C	T	R	V	0	1	0	1	1	0	0	1	1	0	2	0	0	0	0	2	1	0	0	1	0	0	11	0	1243.6	E9Q704;F8VQA4;P97467;Q8BQ31	E9Q704	184	194	Pam	Peptidyl-glycine alpha-amidating monooxygenase;Peptidylglycine alpha-hydroxylating monooxygenase;Peptidyl-alpha-hydroxyglycine alpha-amidating lyase	yes	no	2	0.0044577	86.114			By MS/MS
DFMIQGGDFTR	SKFHRVIKDFMIQGGD	IQGGDFTRGDGTGGKS	K	D	F	T	R	G	0	1	0	2	0	1	0	2	0	1	0	0	1	2	0	0	1	0	0	0	0	0	11	0	1285.58	Q9DCY1;P24369;Q6ZQM2	Q9DCY1	99	109	Ppib	Peptidyl-prolyl cis-trans isomerase;Peptidyl-prolyl cis-trans isomerase B	yes	no	2	0.00056111	111.63			By MS/MS
DGVANVSIEDR	LGNVTAGKDGVANVSI	ANVSIEDRVISLSGEH	K	D	G	D	R	V	1	1	1	2	0	0	1	1	0	1	0	0	0	0	0	1	0	0	0	2	0	0	11	0	1173.56	P08228	P08228	93	103	Sod1	Superoxide dismutase [Cu-Zn]	yes	yes	2	0.0037962	89.301			By MS/MS
DGVYILDLAAK	INPLVVTKDGVYILDL	YILDLAAKVDATADYI	K	D	G	A	K	V	2	0	0	2	0	0	0	1	0	1	2	1	0	0	0	0	0	0	1	1	0	0	11	0	1176.64	Q3TED3;Q3V117;Q91V92;Q3UEA1;Q3TS02	Q3TED3	210	220	Acly	ATP-citrate synthase	yes	no	2	0.021797	68.536					By matching
DIISDTSGDFR	MYKTDLEKDIISDTSG	SDTSGDFRKLMVALAK	K	D	I	F	R	K	0	1	0	3	0	0	0	1	0	2	0	0	0	1	0	2	1	0	0	0	0	0	11	0	1224.56	Q542G9;P07356;Q3UCD3;Q9CZI7;B0V2N7;B0V2N8;Q99KH3;B0V2N5	Q542G9	158	168	Anxa2	Annexin;Annexin A2	yes	no	2	2.1618e-06	143.24			By MS/MS
DMQHLTVLTSK	ANLDLTWRDMQHLTVL	HLTVLTSKRNQLHDEV	R	D	M	S	K	R	0	0	0	1	0	1	0	0	1	0	2	1	1	0	0	1	2	0	0	1	0	0	11	0	1271.65	Q3UZV3;Q547J8;Q3TYM6;Q3TT48;P21661	Q3UZV3	389	399	Pcsk2	Neuroendocrine convertase 2	yes	no	2;3	2.889e-06	141.13			By MS/MS		By MS/MS
DRDLEVDTTLK	ADDANVVRDRDLEVDT	LEVDTTLKSLSQQIEN	R	D	R	L	K	S	0	1	0	3	0	0	1	0	0	0	2	1	0	0	0	0	2	0	0	1	0	0	11	1	1303.66	Q99LL6;P11087-2;P11087	Q99LL6	351	361	Col1a1	Collagen alpha-1(I) chain	yes	no	2	6.7242e-06	145.81					By MS/MS
DSYVGDEAQSK	VMVGMGQKDSYVGDEA	VGDEAQSKRGILTLKY	K	D	S	S	K	R	1	0	0	2	0	1	1	1	0	0	0	1	0	0	0	2	0	0	1	1	0	0	11	0	1197.52	Q3UAF7;Q3UAF6;Q3U5R4;B2RRX1;P60710;Q3UAA9;Q3UA89;Q3U939;Q3U804;Q61276;Q3TIJ9;Q3UCF8;E9Q5F4;G3UZ07;Q61272;A1E281;E9Q606;Q8CF71;V9GXQ2;Q4KL81;P63260;Q3TSB7;Q3UD81;G3UYG0;Q3UBP6;Q3UBQ4;Q9QZ83	Q3UAF7	51	61	Actb;Actg1;Acta1;Acta2;Gm17087	Actin, cytoplasmic 1;Actin, cytoplasmic 1, N-terminally processed;Actin, cytoplasmic 2;Actin, cytoplasmic 2, N-terminally processed	no	no	2	9.4381e-09	155.26	By MS/MS	By MS/MS	By MS/MS	By MS/MS	By MS/MS
DYSEMYVTCAR	TSCCFGGKDYSEMYVT	EMYVTCARDGLNAEGL	K	D	Y	A	R	D	1	1	0	1	1	0	1	0	0	0	0	0	1	0	0	1	1	0	2	1	0	0	11	0	1393.56	Q64374	Q64374	254	264	Rgn	Regucalcin	yes	yes	2	0.00058038	111.33					By MS/MS
EAAENSLVAYK	FATGNDRKEAAENSLV	ENSLVAYKAASDIAMT	K	E	A	Y	K	A	3	0	1	0	0	0	2	0	0	0	1	1	0	0	0	1	0	0	1	1	0	0	11	0	1193.59	Q5SS40;P62259;Q8BPH1	Q5SS40	143	153	Ywhae	14-3-3 protein epsilon	yes	no	2	0.0023578	96.229			By MS/MS		By MS/MS
EDILLTLLPCK	FCSEETVREDILLTLL	LLTLLPCKTSDTM___	R	E	D	C	K	T	0	0	0	1	1	0	1	0	0	1	4	1	0	0	1	0	1	0	0	0	0	0	11	0	1313.73	Q5BKQ4	Q5BKQ4	458	468	Pnliprp1	Inactive pancreatic lipase-related protein 1	yes	yes	2	3.3265e-06	139.86	By MS/MS		By MS/MS
EEEEEEEAVAR	RKAKQEEKEEEEEEEA	EEEEAVAREKAGPEEV	K	E	E	A	R	E	2	1	0	0	0	0	7	0	0	0	0	0	0	0	0	0	0	0	0	1	0	0	11	0	1318.55	P26339;Q3UN28	P26339	239	249	Chga	Chromogranin-A;Pancreastatin;Beta-granin;WE-14;Catestatin;GE-25;Serpinin-RRG;Serpinin;p-Glu serpinin precursor	yes	no	2	3.8763e-14	211.64	By MS/MS		By MS/MS
EFEVVGYPTLK	PAEPELTKEFEVVGYP	VVGYPTLKFFQNGNRT	K	E	F	L	K	F	0	0	0	0	0	0	2	1	0	0	1	1	0	1	1	0	1	0	1	2	0	0	11	0	1280.67	D3Z6P0-2;D3Z6P0;F6S5U2	D3Z6P0-2	114	124	Pdia2	Protein disulfide-isomerase A2	yes	no	2	0.00066235	110.08	By MS/MS		By MS/MS
EFKEREAIFTK	IRRARMEREFKEREAI	EREAIFTKNQQNARKE	R	E	F	T	K	N	1	1	0	0	0	0	3	0	0	1	0	2	0	2	0	0	1	0	0	0	0	0	11	2	1396.74	D3YWB5;D3YTN4	D3YWB5	154	164	Gimap4		yes	no	2;3	0.0017867	117.52		By MS/MS		By MS/MS	By matching
EGMNIVEAMER	HVVFGKVKEGMNIVEA	NIVEAMERFGSRNGKT	K	E	G	E	R	F	1	1	1	0	0	0	3	1	0	1	0	0	2	0	0	0	0	0	0	1	0	0	11	0	1277.57	Q5SVY2;Q3UAJ1;Q3TE63;P17742;Q9CZK9	Q5SVY2	134	144	Ppia	Peptidyl-prolyl cis-trans isomerase;Peptidyl-prolyl cis-trans isomerase A;Peptidyl-prolyl cis-trans isomerase A, N-terminally processed	yes	no	2	1.4978e-09	171.67	By MS/MS	By matching	By MS/MS	By matching	By MS/MS
EITALAPSTMK	GIADRMQKEITALAPS	ALAPSTMKIKIIAPPE	K	E	I	M	K	I	2	0	0	0	0	0	1	0	0	1	1	1	1	0	1	1	2	0	0	0	0	0	11	0	1160.61	Q3UAF7;Q3UAF6;Q3U5R4;B2RRX1;P60710;Q3UAA9;Q3UA89;Q3U939;Q3U804;Q3UGS0;Q61276;Q3TIJ9;Q3UCF8;E9Q1F2;Q61272;Q99NC5;F8WGM8;Q4KL81;P63260;Q3TSB7;B1ATY1;Q9QZ83	Q3UAF7	316	326	Actb;Acta1;Actg1	Actin, cytoplasmic 1;Actin, cytoplasmic 1, N-terminally processed;Actin, cytoplasmic 2;Actin, cytoplasmic 2, N-terminally processed	no	no	1;2	4.8291e-15	218.6	By MS/MS	By MS/MS	By MS/MS	By MS/MS	By MS/MS
EKPPCLAELER	EWCFCFWREKPPCLAE	PCLAELERTQIQEAAK	R	E	K	E	R	T	1	1	0	0	1	0	3	0	0	0	2	1	0	0	2	0	0	0	0	0	0	0	11	1	1340.68	Q80U51;F6SLR4;Q9ER58	Q80U51	265	275	Spock2	Testican-2	yes	no	3	0.0025335	84.605			By MS/MS
ELHLDHNQISR	GPLPRSLRELHLDHNQ	LDHNQISRVPNNALEG	R	E	L	S	R	V	0	1	1	1	0	1	1	0	2	1	2	0	0	0	0	1	0	0	0	0	0	0	11	0	1360.68	Q8BNU3;Q543D2;P50608;Q7TPZ1	Q8BNU3	180	190	Fmod	Fibromodulin	yes	no	2;3	2.1398e-38	248.21		By MS/MS		By MS/MS
ELLPVLISAMK	VNSMNTVKELLPVLIS	PVLISAMKIFVTTKNS	K	E	L	M	K	I	1	0	0	0	0	0	1	0	0	1	3	1	1	0	1	1	0	0	0	1	0	0	11	0	1212.72	Q64727	Q64727	200	210	Vcl	Vinculin	yes	yes	2	0.015279	72.531	By matching				By MS/MS
ELNDFISYLQR	PKKYEGGRELNDFISY	DFISYLQREATNPPII	R	E	L	Q	R	E	0	1	1	1	0	1	1	0	0	1	2	0	0	1	0	1	0	0	1	0	0	0	11	0	1396.7	P27773	P27773	472	482	Pdia3	Protein disulfide-isomerase A3	yes	yes	2	5.814e-11	192.5					By MS/MS
ELQDLALQGAK	LRHQNLLKELQDLALQ	DLALQGAKERAQQPLK	K	E	L	A	K	E	2	0	0	1	0	2	1	1	0	0	3	1	0	0	0	0	0	0	0	0	0	0	11	0	1184.64	P26339	P26339	78	88	Chga	Chromogranin-A;Pancreastatin;Beta-granin;WE-14;Catestatin;GE-25;Serpinin-RRG;Serpinin;p-Glu serpinin precursor	yes	yes	2	2.0125e-05	131.46	By MS/MS				By MS/MS
ESGLYFIRPLK	EIANKGAKESGLYFIR	LYFIRPLKAKQQFLVY	K	E	S	L	K	A	0	1	0	0	0	0	1	1	0	1	2	1	0	1	1	1	0	0	1	0	0	0	11	1	1321.74	Q3UEM7;Q3UER8;Q8VCM7	Q3UEM7	188	198	Fgg	Fibrinogen gamma chain	yes	no	2;3	2.0065e-10	194.12		By MS/MS		By MS/MS	By matching
FAHTNIESLVK	SNLRDNYRFAHTNIES	TNIESLVKEYDDNGEG	R	F	A	V	K	E	1	0	1	0	0	0	1	0	1	1	1	1	0	1	0	1	1	0	0	1	0	0	11	0	1257.67	P27773	P27773	184	194	Pdia3	Protein disulfide-isomerase A3	yes	yes	2;3	3.3506e-11	190.53	By matching		By MS/MS		By MS/MS
FDDAVVQSDMK	AKRLIGRRFDDAVVQS	AVVQSDMKHWPFMVVN	R	F	D	M	K	H	1	0	0	3	0	1	0	0	0	0	0	1	1	1	0	1	0	0	0	2	0	0	11	0	1253.56	Q3UBA6;Q3TZJ3;Q3TH56;Q3TEK2;P63017;Q504P4;Q3U9L2;Q3TQ13;Q3UDS0;Q3ULM1;Q3TRH3;Q3TB63;D3Z5E2;D3YW43	Q3UBA6	78	88	Hspa8	Heat shock cognate 71 kDa protein	yes	no	2	8.9427e-09	155.97			By MS/MS
FFDEESYSLLR	HAGTYEVRFFDEESYS	EESYSLLRKAQRNNED	R	F	F	L	R	K	0	1	0	1	0	0	2	0	0	0	2	0	0	2	0	2	0	0	1	0	0	0	11	0	1404.66	Q9D6F7;Q3TVJ8;Q9DC94;Q9D8L3;Q62186	Q9D6F7	105	115	Ssr4	Translocon-associated protein subunit delta	yes	no	2	0.0026613	94.767			By MS/MS
FFETCDLDNDK	PMEHCTTRFFETCDLD	TCDLDNDKYIALEEWA	R	F	F	D	K	Y	0	0	1	3	1	0	1	0	0	0	1	1	0	2	0	0	1	0	0	0	0	0	11	0	1402.57	Q5NCU4;Q5NCU5;Q3TXI6;P07214	Q5NCU4	267	277	Sparc	SPARC	yes	no	2	0.014993	72.887			By matching
FFLCQVAGDAK	EISVGESKFFLCQVAG	CQVAGDAKDKDISWFS	K	F	F	A	K	D	2	0	0	1	1	1	0	1	0	0	1	1	0	2	0	0	0	0	0	1	0	0	11	0	1254.61	A0A0A6YWU2;E9Q589;A0A0A6YY47;E9QB01;P13595-4;P13595-3;P13595-2;P13595	A0A0A6YWU2	38	48	Ncam1	Neural cell adhesion molecule 1	yes	no	2	0.037674	65.842
FLKFMNSRVFK	RPSFYADRFLKFMNSR	FMNSRVFKKIQALGSR	R	F	L	F	K	K	0	1	1	0	0	0	0	0	0	0	1	2	1	3	0	1	0	0	0	1	0	0	11	2	1415.77	P70181-2;P70181	P70181-2	387	397	Pip5k1b	Phosphatidylinositol 4-phosphate 5-kinase type-1 beta	yes	no	3	0.01342	66.056
FNPETDFLTGK	LAIAGTLKFNPETDFL	ETDFLTGKDGKKFKLE	K	F	N	G	K	D	0	0	1	1	0	0	1	1	0	0	1	1	0	2	1	0	2	0	0	0	0	0	11	0	1267.61	Q99KI0	Q99KI0	507	517	Aco2	Aconitate hydratase, mitochondrial	yes	yes	2	0.0085877	80.834
FNVWDTAGQEK	HTNRGPIKFNVWDTAG	WDTAGQEKFGGLRDGY	K	F	N	E	K	F	1	0	1	1	0	1	1	1	0	0	0	1	0	1	0	0	1	1	0	1	0	0	11	0	1293.6	Q3ULW0;Q14AA6;A6H622;Q61820;P62827	Q3ULW0	61	71	Ran;1700009N14Rik;Rasl2-9	GTP-binding nuclear protein Ran, testis-specific isoform;GTP-binding nuclear protein Ran	yes	no	2	0.0027019	99.276
FQTVESVNLMK	VFFINVEKFQTVESVN	VESVNLMKKICAQHEQ	K	F	Q	M	K	K	0	0	1	0	0	1	1	0	0	0	1	1	1	1	0	1	1	0	0	2	0	0	11	0	1294.66	Q3UNQ4;Q3U0K4;E9QNW6;Q8VDG7	Q3UNQ4	283	293	Pafah2	Platelet-activating factor acetylhydrolase 2, cytoplasmic	yes	no	2	0.015372	61.344				By MS/MS
FVSISDLFVPK	LLEPIEQKFVSISDLF	ISDLFVPKDLGTDSQI	K	F	V	P	K	D	0	0	0	1	0	0	0	0	0	1	1	1	0	2	1	2	0	0	0	2	0	0	11	0	1250.69	Q3UUX9;Q3TIY6;Q3UC72;Q3UPA3;Q61598-2;Q61598	Q3UUX9	380	390	Gdi2	Rab GDP dissociation inhibitor beta	yes	no	2	0.0011097	103.21	By matching		By matching		By matching
GAGTDDHTLIR	ETLYYAMKGAGTDDHT	TDDHTLIRVVVSRSEI	K	G	A	I	R	V	1	1	0	2	0	0	0	2	1	1	1	0	0	0	0	0	2	0	0	0	0	0	11	0	1154.57	P48036	P48036	259	269	Anxa5	Annexin A5	yes	yes	3	0.011631	67.08
GDLGIEIPAEK	SDGIMVARGDLGIEIP	GIEIPAEKVFLAQKMM	R	G	D	E	K	V	1	0	0	1	0	0	2	2	0	2	1	1	0	0	1	0	0	0	0	0	0	0	11	0	1140.6	P52480;Q3UEH4;E9Q509;Q3UEI4;A7MCU9;G3X925;P53657;P52480-2	P52480	295	305	Pkm;Pklr	Pyruvate kinase PKM;Pyruvate kinase;Pyruvate kinase PKLR	no	no	2	0.00056798	111.52	By MS/MS		By MS/MS		By MS/MS
GEENWLSDMCK	IIHGFIDKGEENWLSD	NWLSDMCKNMFRVESV	K	G	E	C	K	N	0	0	1	1	1	0	2	1	0	0	1	1	1	0	0	1	0	1	0	0	0	0	11	0	1367.55	Q6P8U6;Q9D950	Q6P8U6	98	108	Pnlip;mCG_10680	Pancreatic triacylglycerol lipase;Triacylglycerol lipase	yes	no	2	4.0429e-06	137.78			By MS/MS
GHLENNPALEK	TMMRKAIRGHLENNPA	ENNPALEKLLPHIRGN	R	G	H	E	K	L	1	0	2	0	0	0	2	1	1	0	2	1	0	0	1	0	0	0	0	0	0	0	11	0	1220.61	Q5M8R8;Q5FWB6;P14869;S4R1N1;E9Q070;D3YVM5;O89073	Q5M8R8	67	77	Rplp0;Gm8730	60S acidic ribosomal protein P0	yes	no	2	0.00046736	113.07
GVSQAVEHINK	DKTRFMGKGVSQAVEH	QAVEHINKTIAPALVS	K	G	V	N	K	T	1	0	1	0	0	1	1	1	1	1	0	1	0	0	0	1	0	0	0	2	0	0	11	0	1180.62	Q5FW97;P17182;Q8CF78;B1ARR7	Q5FW97	61	71	EG433182;Eno1	Alpha-enolase;Enolase	yes	no	2;3	5.6895e-05	122.55					By MS/MS
HLDLIEMLEAK	ERFYERKRHLDLIEML	LIEMLEAKRPWVEYEN	R	H	L	A	K	R	1	0	0	1	0	0	2	0	1	1	3	1	1	0	0	0	0	0	0	0	0	0	11	0	1310.69	Q8CG46-2;Q8CG46	Q8CG46-2	259	269	Smc5	Structural maintenance of chromosomes protein 5	yes	no	2	0.022598	70.908	By matching	By matching	By matching		By matching
HQGVMVGMGQK	PSIVGRPRHQGVMVGM	VMVGMGQKDSYVGDEA	R	H	Q	Q	K	D	0	0	0	0	0	2	0	3	1	0	0	1	2	0	0	0	0	0	0	2	0	0	11	0	1170.56	Q3UAF7;Q3UAF6;Q3U5R4;B2RRX1;P60710;Q3UAA9;Q3UA89;Q3U939;Q3U804;Q3UGS0;Q61276;Q3TIJ9;Q3UCF8;E9Q5F4;G3UZ07;Q61272;A1E281;E9Q606;E9Q2D1;Q4KL81;P63260;Q3TSB7;Q3UD81;G3UYG0;Q8BFZ3;Q3UBP6;Q3UBQ4	Q3UAF7	40	50	Actb;Actg1;Acta1;Actbl2	Actin, cytoplasmic 1;Actin, cytoplasmic 1, N-terminally processed;Actin, cytoplasmic 2;Actin, cytoplasmic 2, N-terminally processed;Beta-actin-like protein 2	no	no	2	1.7704e-09	169.65	By MS/MS	By MS/MS	By MS/MS	By MS/MS	By MS/MS
IEVEKPFAIAK	VIIVDSGKIEVEKPFA	EKPFAIAKE_______	K	I	E	A	K	E	2	0	0	0	0	0	2	0	0	2	0	2	0	1	1	0	0	0	0	1	0	0	11	1	1243.72	Q9DCY1;P24369	Q9DCY1	205	215	Ppib	Peptidyl-prolyl cis-trans isomerase;Peptidyl-prolyl cis-trans isomerase B	yes	no	2;3	0.00059637	101.3			By MS/MS
IFGVTTLDIVR	HGVYNPNKIFGVTTLD	VTTLDIVRANTFVAEL	K	I	F	V	R	A	0	1	0	1	0	0	0	1	0	2	1	0	0	1	0	0	2	0	0	2	0	0	11	0	1232.71	P08249;A0A0G2JF23;A0A0G2JGY4	P08249	166	176	Mdh2	Malate dehydrogenase, mitochondrial	yes	no	2	0.0023578	96.229			By matching
IGGIGTVPVGR	LPLQDVYKIGGIGTVP	IGTVPVGRVETGVLKP	K	I	G	G	R	V	0	1	0	0	0	0	0	4	0	2	0	0	0	0	1	0	1	0	0	2	0	0	11	0	1024.6	Q58E64;Q3UA81;P10126;Q3TII3;Q3UZQ3;P62631	Q58E64	256	266	Eef1a1;Eef1a2	Elongation factor 1-alpha;Elongation factor 1-alpha 1;Elongation factor 1-alpha 2	yes	no	2	0.0036406	90.05	By MS/MS	By matching	By MS/MS	By MS/MS	By MS/MS
ILMVGLDAAGK	LFGKKQMRILMVGLDA	VGLDAAGKTTILYKLK	R	I	L	G	K	T	2	0	0	1	0	0	0	2	0	1	2	1	1	0	0	0	0	0	0	1	0	0	11	0	1086.61	Q14BR4;Q9DD04;P61750;P84084;D3YV25;E9Q2C2;Q3U344;Q8BSL7;P84078;P61205	Q14BR4	20	30	Arf4;Arf5;Arf3;Arf2;Arf1	ADP-ribosylation factor 4;ADP-ribosylation factor 5;ADP-ribosylation factor 2;ADP-ribosylation factor 1;ADP-ribosylation factor 3	no	no	2	0.011627	77.062
IPDQLVILDMK	FESKGTGRIPDQLVIL	QLVILDMKHGVEAKNY	R	I	P	M	K	H	0	0	0	2	0	1	0	0	0	2	2	1	1	0	1	0	0	0	0	1	0	0	11	0	1283.72	Q9D1D4	Q9D1D4	117	127	Tmed10	Transmembrane emp24 domain-containing protein 10	yes	yes	2	0.00010119	124.12			By matching
ISATDEAQVQK	FVGHQVLRISATDEAQ	TDEAQVQKVRELEELE	R	I	S	Q	K	V	2	0	0	1	0	2	1	0	0	1	0	1	0	0	0	1	1	0	0	1	0	0	11	0	1188.6	Q7TPZ8	Q7TPZ8	28	38	Cpa1	Carboxypeptidase A1	yes	yes	2	3.6703e-13	166.97	By MS/MS	By MS/MS	By MS/MS
ISGDLEVLAEK	KLELSENRISGDLEVL	DLEVLAEKCPNLKHLN	R	I	S	E	K	C	1	0	0	1	0	0	2	1	0	1	2	1	0	0	0	1	0	0	0	1	0	0	11	0	1172.63	F6UFG6;D3YYE1;D3Z7M9;Q64G17;O35381	F6UFG6	72	82	Anp32a;Anp32c	Putative acidic leucine-rich nuclear phosphoprotein 32 family member C;Acidic leucine-rich nuclear phosphoprotein 32 family member A	yes	no	2	0.016371	71.176			By matching
ISGVGNVTPAR	CVTTGWGRISGVGNVT	VGNVTPARLQQVVLPL	R	I	S	A	R	L	1	1	1	0	0	0	0	2	0	1	0	0	0	0	1	1	1	0	0	2	0	0	11	0	1069.59	Q9ER05;Q9D7P8;Q9D960;Q9DC82	Q9ER05	163	173	Ctrl		yes	no	2	8.5132e-09	156.58	By MS/MS	By MS/MS	By MS/MS
IWHHTFYNELR	TNWDDMEKIWHHTFYN	HTFYNELRVAPEEHPV	K	I	W	L	R	V	0	1	1	0	0	0	1	0	2	1	1	0	0	1	0	0	1	1	1	0	0	0	11	0	1514.74	Q3UAF7;Q3UAF6;Q3U5R4;B2RRX1;P60710;Q3UAA9;Q3UA89;Q3U939;Q3U804;Q3UGS0;Q61276;Q3TIJ9;Q3UCF8;E9Q5F4;G3UZ07;Q61272;A1E281;E9Q606;Q4KL81;P63260;Q3TSB7;Q3UD81;G3UYG0;Q3UBP6;Q3UBQ4;Q9QZ83	Q3UAF7	85	95	Actb;Actg1;Acta1	Actin, cytoplasmic 1;Actin, cytoplasmic 1, N-terminally processed;Actin, cytoplasmic 2;Actin, cytoplasmic 2, N-terminally processed	no	no	3	3.8278e-11	189.58		By matching		By MS/MS	By MS/MS
IYIDSNNNPER	ATHNALAKIYIDSNNN	DSNNNPERFLRENPYY	K	I	Y	E	R	F	0	1	3	1	0	0	1	0	0	2	0	0	0	0	1	1	0	0	1	0	0	0	11	0	1333.63	Q5SXR6;Q68FD5;Q80U89;Q3UPJ3	Q5SXR6	886	896	Cltc;mKIAA0034	Clathrin heavy chain;Clathrin heavy chain 1	yes	no	2	0.05563	57.401
KEEELQAALAR	ELKMQLAKKEEELQAA	ELQAALARVEEEAAQK	K	K	E	A	R	V	3	1	0	0	0	1	3	0	0	0	2	1	0	0	0	0	0	0	0	0	0	0	11	1	1256.67	Q8VDD5;E9QPE7;Q8R384;Q69ZX3;O08638-2;O08638	Q8VDD5	1081	1091	Myh9;Myh11	Myosin-9;Myosin-11	yes	no	3	0.017841	59.84			By MS/MS
KIEKFHSHLMR	TDQAQDVKKIEKFHSH	KFHSHLMRLMVAKESR	K	K	I	M	R	L	0	1	0	0	0	0	1	0	2	1	1	2	1	1	0	1	0	0	0	0	0	0	11	2	1424.77	Q3UIK3	Q3UIK3	61	71	Srp9	Signal recognition particle 9 kDa protein	yes	yes	2	0.024437	87.568				By MS/MS
LAPEYEAAATR	PWCGHCKRLAPEYEAA	EYEAAATRLKGIVPLA	R	L	A	T	R	L	4	1	0	0	0	0	2	0	0	0	1	0	0	0	1	0	1	0	1	0	0	0	11	0	1190.59	P27773;F6Q404	P27773	63	73	Pdia3	Protein disulfide-isomerase A3	yes	no	2	0.0026505	94.82			By matching
LDLHVIPVWEK	RMTAALPKLDLHVIPV	HVIPVWEKGITGKGVV	K	L	D	E	K	G	0	0	0	1	0	0	1	0	1	1	2	1	0	0	1	0	0	1	0	2	0	0	11	0	1347.76	Q32MU0;P63239;Q8BRQ2	Q32MU0	144	154	Pcsk1	Neuroendocrine convertase 1	yes	no	3	0.0011776	93.614	By MS/MS		By MS/MS	By MS/MS	By MS/MS
LIDDMVAQVLK	NKIWYEHRLIDDMVAQ	DMVAQVLKSSGGFVWA	R	L	I	L	K	S	1	0	0	2	0	1	0	0	0	1	2	1	1	0	0	0	0	0	0	2	0	0	11	0	1243.68	P54071	P54071	289	299	Idh2	Isocitrate dehydrogenase [NADP], mitochondrial	yes	yes	2	0.0039425	88.596			By matching
LLVPYLIEAVR	TPGFIVNRLLVPYLIE	PYLIEAVRLHERGDAS	R	L	L	V	R	L	1	1	0	0	0	0	1	0	0	1	3	0	0	0	1	0	0	0	1	2	0	0	11	0	1284.78	Q61425	Q61425	222	232	Hadh	Hydroxyacyl-coenzyme A dehydrogenase, mitochondrial	yes	yes	2	0.053071	60.255					By MS/MS
LLYNNVSNFGR	EKMYDAAKLLYNNVSN	NNVSNFGRLASTLVHL	K	L	L	G	R	L	0	1	3	0	0	0	0	1	0	0	2	0	0	1	0	1	0	0	1	1	0	0	11	0	1295.66	Q5SXR6;Q68FD5;Q80U89;Q3UPJ3;Q8K2I5	Q5SXR6	1220	1230	Cltc;mKIAA0034	Clathrin heavy chain;Clathrin heavy chain 1	yes	no	2	0.011627	77.062
LMIEMDGTENK	VEQEKIDKLMIEMDGT	EMDGTENKSKFGANAI	K	L	M	N	K	S	0	0	1	1	0	0	2	1	0	1	1	1	2	0	0	0	1	0	0	0	0	0	11	0	1279.58	Q5FW97;P17182;Q6PHC1;Q8CF78;B0QZL1;B1ARR7	Q5FW97	93	103	EG433182;Eno1	Alpha-enolase;Enolase	yes	no	2	2.1488e-09	166.86			By MS/MS
LQLWDTAGQER	YLEDRTIRLQLWDTAG	WDTAGQERFRSLIPSY	R	L	Q	E	R	F	1	1	0	1	0	2	1	1	0	0	2	0	0	0	0	0	1	1	0	0	0	0	11	0	1315.65	D3YV69;Q3U4W5;Q0PD54;Q0PD53;Q0PD15;P61294;P35279-2;P35279;Q8BHD0	D3YV69	31	41	Rab6a;Rab6b;Rab39;Rab39a	Ras-related protein Rab-6B;Ras-related protein Rab-6A;Ras-related protein Rab-39A	yes	no	2	3.99e-11	193.96			By MS/MS
LQTQGLGTALK	DKCRLWGKLQTQGLGT	QGLGTALKILFSEKEI	K	L	Q	L	K	I	1	0	0	0	0	2	0	2	0	0	3	1	0	0	0	0	2	0	0	0	0	0	11	0	1128.65	Q14DR9;Q8R2E9;Q4FK57;Q4FJZ3;Q8R180	Q14DR9	402	412	Ero1lb;Ero1l	ERO1-like protein beta;ERO1-like protein alpha	no	no	2	8.4988e-05	125.72			By MS/MS
LSILYPATTGR	FGPDKKLKLSILYPAT	LYPATTGRNFDEILRV	K	L	S	G	R	N	1	1	0	0	0	0	0	1	0	1	2	0	0	0	1	1	2	0	1	0	0	0	11	0	1190.67	Q53ZU7;O08709;Q6GT24;D3Z0Y2;Q6A0D0;Q8BPD3	Q53ZU7	145	155	Prdx6	Peroxiredoxin-6	yes	no	2	0.00035044	114.86	By matching		By matching
LTGLLDLALEK	AYQVRNCRLTGLLDLA	LLDLALEKDYVRTKVA	R	L	T	E	K	D	1	0	0	1	0	0	1	1	0	0	5	1	0	0	0	0	1	0	0	0	0	0	11	0	1184.7	Q8C5B4;E9PV85;P00688	P00688	174	184	Amy2a1;Amy2	Alpha-amylase;Pancreatic alpha-amylase	no	no	2	7.7644e-07	147.26	By MS/MS	By MS/MS	By MS/MS	By MS/MS	By MS/MS
MKDTDSEEEIR	FLTMMARKMKDTDSEE	TDSEEEIREAFRVFDK	K	M	K	I	R	E	0	1	0	2	0	0	3	0	0	1	0	1	1	0	0	1	1	0	0	0	0	0	11	1	1351.59	P62204;Q3UKW2;Q9D6P8	P62204	77	87	Calm1;Calml3	Calmodulin;Calmodulin-like protein 3	yes	no	2;3	0.00071706	117.2					By MS/MS
MLLADQGQSWK	RGRCEAMRMLLADQGQ	ADQGQSWKEEVVTIDT	R	M	L	W	K	E	1	0	0	1	0	2	0	1	0	0	2	1	1	0	0	1	0	1	0	0	0	0	11	0	1275.63	P19157;K9JA74;Q8VC73;F6RWR5;P46425	P19157	20	30	Gstp1;Gstp2;BC021614	Glutathione S-transferase P 1;Glutathione S-transferase P 2	yes	no	2	4.9441e-09	161.67			By MS/MS
NELESYAYSLK	LKERIDTRNELESYAY	ESYAYSLKNQIGDKEK	R	N	E	L	K	N	1	0	1	0	0	0	2	0	0	0	2	1	0	0	0	2	0	0	2	0	0	0	11	0	1315.63	Q3U9G2;Q3TWF2;P20029;Q9DC41;Q3U7T8;Q3U6V3	Q3U9G2	564	574	Hspa5	78 kDa glucose-regulated protein	yes	no	2	0.00066233	110.08					By MS/MS
NFEQVAFDETK	PVKTLVSKNFEQVAFD	QVAFDETKNVFVKFYA	K	N	F	T	K	N	1	0	1	1	0	1	2	0	0	0	0	1	0	2	0	0	1	0	0	1	0	0	11	0	1326.61	D3Z6P0-2;D3Z6P0;F6Q519	D3Z6P0-2	397	407	Pdia2	Protein disulfide-isomerase A2	yes	no	2	0.0003228	115.29			By MS/MS
NFYNVDISYLK	NTTWQAGRNFYNVDIS	NVDISYLKKLCGTVLG	R	N	F	L	K	K	0	0	2	1	0	0	0	0	0	1	1	1	0	1	0	1	0	0	2	1	0	0	11	0	1374.68	Q3TVS6;Q3TC17;P10605	Q3TVS6	46	56	Ctsb	Cathepsin B;Cathepsin B light chain;Cathepsin B heavy chain	yes	no	2	0.013603	74.611			By MS/MS
NHYNEEMSNLR	ENELAKVRNHYNEEMS	NEEMSNLRNKYETEIN	R	N	H	L	R	N	0	1	3	0	0	0	2	0	1	0	1	0	1	0	0	1	0	0	1	0	0	0	11	0	1405.6	E9Q557	E9Q557	1209	1219	Dsp	Desmoplakin	yes	yes	2	0.0026613	94.767			By MS/MS
NMCKPKPLLEK	EALNLSFKNMCKPKPL	KPKPLLEKWLNDAETM	K	N	M	E	K	W	0	0	1	0	1	0	1	0	0	0	2	3	1	0	2	0	0	0	0	0	0	0	11	2	1356.73	O89067	O89067	11	21	Pou2f2		yes	yes	2;3;4	0.00072588	102.4		By MS/MS		By MS/MS	By MS/MS
NMESQSAENQK	________________	SQSAENQKEPAA____	K	N	M	Q	K	E	1	0	2	0	0	2	2	0	0	0	0	1	1	0	0	2	0	0	0	0	0	0	11	0	1264.54	B1ASQ1;Q9D4F3	B1ASQ1	8	18	4932442L08Rik		yes	no	2	0.018899	57.885				By matching	By matching
NQFETEINITK	DEEIISLKNQFETEIN	ETEINITKTTIHQLTM	K	N	Q	T	K	T	0	0	2	0	0	1	2	0	0	2	0	1	0	1	0	0	2	0	0	0	0	0	11	0	1335.67	E9Q557	E9Q557	1376	1386	Dsp	Desmoplakin	yes	yes	2	0.0013818	100.93			By MS/MS
NSLESYAFNMK	QRDKVSSKNSLESYAF	ESYAFNMKATVEDEKL	K	N	S	M	K	A	1	0	2	0	0	0	1	0	0	0	1	1	1	1	0	2	0	0	1	0	0	0	11	0	1302.59	Q3UBA6;Q3TZJ3;Q3TH56;Q3TEK2;P63017;Q504P4;Q3U9L2;Q3TF16;Q3TQ13;Q3UDS0;Q3ULM1;Q3TRH3;Q3KQJ4;Q3TH04;Q3UXU1;Q3UBR0	Q3UBA6	540	550	Hspa8	Heat shock cognate 71 kDa protein	yes	no	2	0.001405	100.82					By MS/MS
NSQPWQVAVYR	VGGFNCEKNSQPWQVA	PWQVAVYRFTKYQCGG	K	N	S	Y	R	F	1	1	1	0	0	2	0	0	0	0	0	0	0	0	1	1	0	1	1	2	0	0	11	0	1346.67	A0A0B6VSQ6;P15947;Q7M0B4;P15945	A0A0B6VSQ6	34	44	Klk1;Klk1b5	Kallikrein-1;Kallikrein 1-related peptidase b5	yes	no	2	0.0011546	102.52			By MS/MS
NYVNGKTFLEK	WKATAMGKNYVNGKTF	NGKTFLEKRYNEDLEL	K	N	Y	E	K	R	0	0	2	0	0	0	1	1	0	0	1	2	0	1	0	0	1	0	1	1	0	0	11	1	1311.68	Q8BKE0;Q9CZ58;Q3UWT6;P49722	Q8BKE0	115	125	Psma2	Proteasome subunit alpha type;Proteasome subunit alpha type-2	yes	no	3	0.027258	55.314	By MS/MS		By MS/MS		By MS/MS
QAENEPPSAPK	RIILEALRQAENEPPS	NEPPSAPKENKPYALN	R	Q	A	P	K	E	2	0	1	0	0	1	2	0	0	0	0	1	0	0	3	1	0	0	0	0	0	0	11	0	1166.56	Q03517;Q4W8U9	Q03517	122	132	Scg2	Secretogranin-2;Secretoneurin;Manserin	yes	no	2	0.0016708	99.539	By MS/MS		By matching		By MS/MS
QITLNDLPVGR	IDDKGVLRQITLNDLP	LNDLPVGRSVDETLRL	R	Q	I	G	R	S	0	1	1	1	0	1	0	1	0	1	2	0	0	0	1	0	1	0	0	1	0	0	11	0	1224.68	B1AZS9;O08807	B1AZS9	199	209	Prdx4	Peroxiredoxin-4	yes	no	2	0.0031781	97.633					By MS/MS
QITVNDLPVGR	IDAKGVLRQITVNDLP	VNDLPVGRSVDEALRL	R	Q	I	G	R	S	0	1	1	1	0	1	0	1	0	1	1	0	0	0	1	0	1	0	0	2	0	0	11	0	1210.67	Q61171;Q5M9N9	Q61171	140	150	Prdx2	Peroxiredoxin-2	yes	no	2	0.00085548	107.11	By matching		By MS/MS
QLQNIIQATSR	FERMDHLRQLQNIIQA	NIIQATSREIMWINDC	R	Q	L	S	R	E	1	1	1	0	0	3	0	0	0	2	1	0	0	0	0	1	1	0	0	0	0	0	11	0	1270.7	E9Q557;E9PZW0	E9Q557	283	293	Dsp	Desmoplakin	yes	no	2	5.0084e-06	134.98			By MS/MS
QQIQNDLNQWK	KQRLECEKQQIQNDLN	QNDLNQWKTQYSRKEE	K	Q	Q	W	K	T	0	0	2	1	0	4	0	0	0	1	1	1	0	0	0	0	0	1	0	0	0	0	11	0	1413.7	E9Q557;E9PZW0;Q9CV95	E9Q557	1870	1880	Dsp	Desmoplakin	yes	no	2	0.00010283	123.96			By MS/MS
QVHPDTGISSK	VYVYKVLKQVHPDTGI	PDTGISSKAMGIMNSF	K	Q	V	S	K	A	0	0	0	1	0	1	0	1	1	1	0	1	0	0	1	2	1	0	0	1	0	0	11	0	1167.59	A0JLV3;B2RVD5;B2RTK3;Q8CBB6;Q921L4;Q8CGP2;Q8CGP1;Q6ZWY9;Q64525;Q64478;Q64475;P10854;P10853;Q8CGP2-2;A0JNS9;Q9D2U9;Q8CGP0;Q64524;P70696;Q8VEE3;G3X9D5	A0JLV3	45	55	Hist1h2bj;Hist1h2bk;Hist1h2bm;Hist1h2br;LOC665622;Hist1h2bp;Hist1h2bc;Hist2h2bb;Hist1h2bh;Hist1h2bb;Hist1h2bf;Hist1h2ba;Hist3h2ba;Hist3h2bb;Hist2h2be	Histone H2B;Histone H2B type 1-P;Histone H2B type 1-K;Histone H2B type 1-C/E/G;Histone H2B type 2-B;Histone H2B type 1-H;Histone H2B type 1-B;Histone H2B type 1-M;Histone H2B type 1-F/J/L;Histone H2B type 3-A;Histone H2B type 3-B;Histone H2B type 2-E;Histone H2B type 1-A	yes	no	2;3	6.4197e-05	127.78	By MS/MS		By MS/MS	By matching	By MS/MS
SANSNPAMAPR	EMRLELQRSANSNPAM	SNPAMAPRERKAGCKN	R	S	A	P	R	E	3	1	2	0	0	0	0	0	0	0	0	0	1	0	2	2	0	0	0	0	0	0	11	0	1114.52	Q545V6;P60041	Q545V6	89	99	Sst	Somatostatin;Antrin;Somatostatin-28;Somatostatin-14	yes	no	2	0.00014222	120.06			By MS/MS
SCGLSNLACIR	VVSGFSLKSCGLSNLA	LSNLACIRDIFPNTVL	K	S	C	I	R	D	1	1	1	0	2	0	0	1	0	1	2	0	0	0	0	2	0	0	0	0	0	0	11	0	1249.59	Q91Y47	Q91Y47	192	202	F11	Coagulation factor XI;Coagulation factor XIa heavy chain;Coagulation factor XIa light chain	yes	yes	2	0.00085514	109.16		By MS/MS		By MS/MS
SDTSSNHAVLK	YSYETKGKSDTSSNHA	SSNHAVLKLAKGDEVW	K	S	D	L	K	L	1	0	1	1	0	0	0	0	1	0	1	1	0	0	0	3	1	0	0	1	0	0	11	0	1157.57	Q4ZJN6;D3YZ61;Q9ES30	Q4ZJN6	201	211	C1qtnf3	Complement C1q tumor necrosis factor-related protein 3	yes	no	2	1.7498e-09	169.81	By matching	By MS/MS		By MS/MS	By MS/MS
SILFVPTSAPR	AEGEVTFKSILFVPTS	FVPTSAPRGLFDEYGS	K	S	I	P	R	G	1	1	0	0	0	0	0	0	0	1	1	0	0	1	2	2	1	0	0	1	0	0	11	0	1186.67	Q91V38;Q3UAD6;P08113;Q3UBU0;Q3TUD6;Q8CCY5;F7C312	Q91V38	385	395	Hsp90b1	Endoplasmin	yes	no	2	6.6844e-05	127.51	By matching		By MS/MS	By matching	By MS/MS
SLYYYIQQDTK	EFKRKYGKSLYYYIQQ	YYIQQDTKGDYQKALL	K	S	L	T	K	G	0	0	0	1	0	2	0	0	0	1	1	1	0	0	0	1	1	0	3	0	0	0	11	0	1420.69	Q542G9;P07356;Q3UCD3;Q9CZI7;Q99KH3;B0V2N5	Q542G9	314	324	Anxa2	Annexin;Annexin A2	yes	no	2	1.3695e-09	172.61
SNFEEALAAHK	DNVLVLKKSNFEEALA	EEALAAHKYLLVEFYA	K	S	N	H	K	Y	3	0	1	0	0	0	2	0	1	0	1	1	0	1	0	1	0	0	0	0	0	0	11	0	1215.59	Q3UDR2;Q3URP6;Q3U738;Q3TWE3;Q3TIM0;Q3THC3;Q3TF72;P09103;Q3TGS0;Q3UBY9;Q3UJA8;Q3UA23;Q3TT76;E9Q8G8	Q3UDR2	34	44	P4hb	Protein disulfide-isomerase	yes	no	2;3	0.0047598	84.507	By MS/MS		By MS/MS		By MS/MS
TDIANLAEEFK	KYLSKTGRTDIANLAE	ANLAEEFKDHLVPDPG	R	T	D	F	K	D	2	0	1	1	0	0	2	0	0	1	1	1	0	1	0	0	1	0	0	0	0	0	11	0	1249.62	Q99KI0	Q99KI0	313	323	Aco2	Aconitate hydratase, mitochondrial	yes	yes	2	0.0009537	102.4			By matching
TDYMVGSYGPR	RKGVKIDKTDYMVGSY	MVGSYGPRAEEYEFLT	K	T	D	P	R	A	0	1	0	1	0	0	0	2	0	0	0	0	1	0	1	1	1	0	2	1	0	0	11	0	1244.55	Q99PT1	Q99PT1	142	152	Arhgdia	Rho GDP-dissociation inhibitor 1	yes	yes	2	0.00086118	107.03			By matching
TLLLSIFQDTK	VEDDADTKTLLLSIFQ	LSIFQDTKSFPMHFDE	K	T	L	T	K	S	0	0	0	1	0	1	0	0	0	1	3	1	0	1	0	1	2	0	0	0	0	0	11	0	1277.72	Q14DR9;Q8R2E9	Q14DR9	341	351	Ero1lb	ERO1-like protein beta	yes	no	2	0.00035044	114.86	By MS/MS		By MS/MS
TNSTFNQVVLK	LYRFLARRTNSTFNQV	TFNQVVLKRLFMSRTN	R	T	N	L	K	R	0	0	2	0	0	1	0	0	0	0	1	1	0	1	0	1	2	0	0	2	0	0	11	0	1249.67	Q0QEW9;Q642K1;Q58EW0;P35980;G3UZJ6	Q0QEW9	16	26	Rpl18	60S ribosomal protein L18	yes	no	2	0.044049	61.213			By matching
TPAQYDASELK	TVILGLLKTPAQYDAS	QYDASELKASMKGLGT	K	T	P	L	K	A	2	0	0	1	0	1	1	0	0	0	1	1	0	0	1	1	1	0	1	0	0	0	11	0	1221.59	Q542G9;P07356;Q3UCD3;Q9CZI7;B0V2N7;B0V2N8	Q542G9	105	115	Anxa2	Annexin;Annexin A2	yes	no	2	3.2325e-09	164.11			By MS/MS
TVVTEAGNLLK	SLPCDICKTVVTEAGN	TEAGNLLKDNATQEEI	K	T	V	L	K	D	1	0	1	0	0	0	1	1	0	0	2	1	0	0	0	0	2	0	0	2	0	0	11	0	1143.65	Q3TWM9;Q3UAS4;Q3UE29;E9PZ00;Q3TXJ0;Q8BFQ1;Q3U8C4;Q3U897;Q3U825;Q3U5W2;Q3TXP9;Q3TWL8;Q3TWF9;Q3TWE9;Q3TKK3;Q3TKB2;Q3TIT5;Q3TID4;K3W4L3;B2RUD7;Q3UFE8;J3QPG5;Q61207	Q3TWM9	41	51	Psap	Prosaposin	yes	no	2	0.0013927	100.88			By MS/MS
TYQVVLGEHER	GHCISTSRTYQVVLGE	VVLGEHERGVEEGQEQ	R	T	Y	E	R	G	0	1	0	0	0	1	2	1	1	0	1	0	0	0	0	0	1	0	1	2	0	0	11	0	1329.67	Q9CQ52	Q9CQ52	79	89	Cela3b	Chymotrypsin-like elastase family member 3B	yes	yes	2;3	1.429e-09	172.17	By MS/MS		By MS/MS
VDATEQTDLAK	SPPIPLAKVDATEQTD	TEQTDLAKRFDVSGYP	K	V	D	A	K	R	2	0	0	2	0	1	1	0	0	0	1	1	0	0	0	0	2	0	0	1	0	0	11	0	1189.58	A0A0R4J0Z1;P08003	A0A0R4J0Z1	231	241	Pdia4	Protein disulfide-isomerase A4	yes	no	2	9.8112e-05	124.42					By matching
VDGPAEPELTK	SAVVTLAKVDGPAEPE	PAEPELTKEFEVVGYP	K	V	D	T	K	E	1	0	0	1	0	0	2	1	0	0	1	1	0	0	2	0	1	0	0	1	0	0	11	0	1154.58	D3Z6P0-2;D3Z6P0;F6S5U2	D3Z6P0-2	103	113	Pdia2	Protein disulfide-isomerase A2	yes	no	2	0.010805	82.437			By MS/MS
VEIIANDQGNR	VGVFKNGRVEIIANDQ	IANDQGNRITPSYVAF	R	V	E	N	R	I	1	1	2	1	0	1	1	1	0	2	0	0	0	0	0	0	0	0	0	1	0	0	11	0	1227.62	Q3UBA6;Q3TZJ3;Q3TH56;Q3TEK2;P63017;Q504P4;Q3U9L2;Q3TF16;Q3TQ13;Q3UDS0;Q3TRH3;Q3TB63;B7U582;P17156;D3Z5E2;D3YW43;B2CSK2;A1L347;Q3TU85;Q3TAI8;A1E2B8;P16627;Q61696;P17879;Q9R2A1;O88687;Q3U9G2;Q3TWF2;P20029;Q9DC41;Q3TKF8;Q3TI47;Q3U7T8;Q3U6V3;Q3UEM8	Q3U9G2	51	61	Hspa8;Hspa2;Hspa1l;Hspa1b;Hspa1a;Hsc70t;Hsp70.3;Hspa5	Heat shock cognate 71 kDa protein;Heat shock-related 70 kDa protein 2;Heat shock 70 kDa protein 1-like;Heat shock 70 kDa protein 1A;Heat shock 70 kDa protein 1B;78 kDa glucose-regulated protein	no	no	2	4.7674e-10	179.2	By MS/MS		By MS/MS		By MS/MS
VFNFCSQETVR	TVERNDGRVFNFCSQE	FCSQETVREDVLLTLS	R	V	F	V	R	E	0	1	1	0	1	1	1	0	0	0	0	0	0	2	0	1	1	0	0	2	0	0	11	0	1385.64	Q6P8U6	Q6P8U6	445	455	Pnlip	Pancreatic triacylglycerol lipase	yes	yes	2	5.525e-07	147.91	By matching		By MS/MS
VFSGVVSTGLK	GRFYAFGRVFSGVVST	GVVSTGLKVRIMGPNY	R	V	F	L	K	V	0	0	0	0	0	0	0	2	0	0	1	1	0	1	0	2	1	0	0	3	0	0	11	0	1092.62	Q8C153;Q3UZ14;Q3UMI7;Q3UDC8;Q3TX47;Q3TWX1;Q3TLB1;Q3TJZ1;P58252;Q6P9L9;Q8BMA8;Q3TW58;Q3UBL9;Q3TK17	Q8C153	416	426	Eef2	Elongation factor 2	yes	no	2	0.0045799	71.085	By matching		By MS/MS
VLDCLQGISYR	YLSDVPVRVLDCLQGI	CLQGISYRLPGLRKIS	R	V	L	Y	R	L	0	1	0	1	1	1	0	1	0	1	2	0	0	0	0	1	0	0	1	1	0	0	11	0	1322.67	F7A6H4;E9Q555	F7A6H4	761	771	Rnf213	E3 ubiquitin-protein ligase RNF213	yes	no	3	0.043065	42.718
VLIAAHGNSLR	PQIKEGKRVLIAAHGN	AAHGNSLRGIVKHLEG	R	V	L	L	R	G	2	1	1	0	0	0	0	1	1	1	2	0	0	0	0	1	0	0	0	1	0	0	11	0	1149.66	Q3U7Z6;Q9DBJ1;Q6NWV5;Q5NCI4;O70250	Q3U7Z6	181	191	Pgam1;Pgam2	Phosphoglycerate mutase 1;Phosphoglycerate mutase 2	yes	no	3	0.035617	52.903		By MS/MS		By matching
VLPGVDALSNV	SLELLEGKVLPGVDAL	GVDALSNV________	K	V	L	N	V	-	1	0	1	1	0	0	0	1	0	0	2	0	0	0	1	1	0	0	0	3	0	0	11	0	1082.6	P09411	P09411	407	417	Pgk1	Phosphoglycerate kinase 1	yes	yes	2	0.02928	51.276			By matching		By matching
VLTPELYAELR	SHNNHMAKVLTPELYA	PELYAELRAKCTPSGF	K	V	L	L	R	A	1	1	0	0	0	0	2	0	0	0	3	0	0	0	1	0	1	0	1	1	0	0	11	0	1302.72	Q04447	Q04447	33	43	Ckb	Creatine kinase B-type	yes	yes	2	4.003e-06	137.89	By matching		By matching		By MS/MS
VSVELTNSLFK	KNPDYRKRVSVELTNS	ELTNSLFKHDPAAWEA	R	V	S	F	K	H	0	0	1	0	0	0	1	0	0	0	2	1	0	1	0	2	1	0	0	2	0	0	11	0	1235.68	Q02257	Q02257	664	674	Jup	Junction plakoglobin	yes	yes	2	6.5087e-07	147.62	By MS/MS		By MS/MS
VTDSSVSVQLR	PGGLRRTRVTDSSVSV	SSVSVQLRE_______	R	V	T	L	R	E	0	1	0	1	0	1	0	0	0	0	1	0	0	0	0	3	1	0	0	3	0	0	11	0	1189.63	A0A0A0MQ97;G3X9C2	A0A0A0MQ97	280	290	Nccrp1	F-box only protein 50	yes	no	2	0.0024847	95.618			By MS/MS
VVNSDISCHYK	TVIPPGEKVVNSDISC	SDISCHYKMYPMHVFA	K	V	V	Y	K	M	0	0	1	1	1	0	0	0	1	1	0	1	0	0	0	2	0	0	1	2	0	0	11	0	1320.61	E9Q704;F8VQA4;P97467;Q8BQ31	E9Q704	219	229	Pam	Peptidyl-glycine alpha-amidating monooxygenase;Peptidylglycine alpha-hydroxylating monooxygenase;Peptidyl-alpha-hydroxyglycine alpha-amidating lyase	yes	no	2	0.01332	74.962					By matching
YALYDASFETK	MLPEKDCRYALYDASF	YDASFETKESRKEELM	R	Y	A	T	K	E	2	0	0	1	0	0	1	0	0	0	1	1	0	1	0	1	1	0	2	0	0	0	11	0	1306.61	Q4FK36;Q9R0P5	Q4FK36	82	92	Dstn	Destrin	yes	no	2	0.00098452	105.13			By MS/MS
YALYDATYETK	MLPDKDCRYALYDATY	YDATYETKESKKEDLV	R	Y	A	T	K	E	2	0	0	1	0	0	1	0	0	0	1	1	0	0	0	0	2	0	3	0	0	0	11	0	1336.62	Q544Y7;P18760;F8WGL3;Q9CX22;Q3UHW9;P45591	Q544Y7	82	92	Cfl1;Cfl2	Cofilin-1;Cofilin-2	yes	no	2	4.003e-06	137.89					By MS/MS
YIANYVLEHPY	EETMLAVKYIANYVLE	NYVLEHPY________	K	Y	I	P	Y	-	1	0	1	0	0	0	1	0	1	1	1	0	0	0	1	0	0	0	3	1	0	0	11	0	1380.67	B2RS76	B2RS76	405	415	Cpb1		yes	yes	2	0.0016191	99.788	By matching	By MS/MS	By MS/MS
YICTTSAIQNR	TGKELLYKYICTTSAI	TTSAIQNRFKYARVTP	K	Y	I	N	R	F	1	1	1	0	1	1	0	0	0	2	0	0	0	0	0	1	2	0	1	0	0	0	11	0	1325.64	Q3TED3;Q3V117;Q91V92;Q3UEA1;Q3TS02	Q3TED3	18	28	Acly	ATP-citrate synthase	yes	no	2	4.6992e-06	135.87
YLAEVACGDDR	KMKGDYFRYLAEVACG	EVACGDDRKQTIENSQ	R	Y	L	D	R	K	2	1	0	2	1	0	1	1	0	0	1	0	0	0	0	0	0	0	1	1	0	0	11	0	1267.55	A3KML3;F6YY69;F6VW30;P68254-2;P68254	A3KML3	128	138	Ywhaq	14-3-3 protein theta	yes	no	2	0.0033784	91.313
YSLEPVAAELK	DGVPMPDKYSLEPVAA	EPVAAELKSLLGKDVL	K	Y	S	L	K	S	2	0	0	0	0	0	2	0	0	0	2	1	0	0	1	1	0	0	1	1	0	0	11	0	1218.65	P09411;S4R2M7	P09411	76	86	Pgk1	Phosphoglycerate kinase 1;Phosphoglycerate kinase	yes	no	2	0.02447	67.656	By matching		By matching
ADDGRPFPQVIK	FHETLYQKADDGRPFP	RPFPQVIKSKGGVVGI	K	A	D	I	K	S	1	1	0	2	0	1	0	1	0	1	0	1	0	1	2	0	0	0	0	1	0	0	12	1	1341.7	Q5FWB7;A6ZI44;P05064;Q6NY00;D3YWI1;Q9CPQ9;A6ZI46;A0A0U1RPN8;D3YV98;A0A0U1RPT5;D3Z510	Q5FWB7	88	99	Aldoa;Aldoart1	Fructose-bisphosphate aldolase;Fructose-bisphosphate aldolase A	yes	no	3	0.031394	51.463			By matching
ADIVENQVMDTR	ETEEERIRADIVENQV	ENQVMDTRMQLIMLCY	R	A	D	T	R	M	1	1	1	2	0	1	1	0	0	1	0	0	1	0	0	0	1	0	0	2	0	0	12	0	1389.66	F6WHQ7;A2AE89;P10649	F6WHQ7	38	49	Gstm1	Glutathione S-transferase Mu 1	yes	no	2	0.00039791	104.24			By matching
ADLINNLGTIAK	DTGIGMTKADLINNLG	NNLGTIAKSGTKAFME	K	A	D	A	K	S	2	0	2	1	0	0	0	1	0	2	2	1	0	0	0	0	1	0	0	0	0	0	12	0	1241.7	Q80Y52;Q3UIF3;Q3TKA2;P07901;A0PJ91;Q3TKB9;Q8C5U3;Q3TKG0;Q8C2A9;B7ZC50;Q71LX8;P11499	Q71LX8	96	107	Hsp90aa1;Hsp90ab1	Heat shock protein HSP 90-alpha;Heat shock protein HSP 90-beta	no	no	2	0.00089565	98.902	By MS/MS	By matching	By MS/MS	By matching	By MS/MS
AEAQEAEDQQAR	AERQERARAEAQEAED	EAEDQQARVLAQLLRA	R	A	E	A	R	V	4	1	0	1	0	3	3	0	0	0	0	0	0	0	0	0	0	0	0	0	0	0	12	0	1344.59	Q9QXV0	Q9QXV0	93	104	Pcsk1n	ProSAAS;KEP;Big SAAS;Little SAAS;Big PEN-LEN;PEN;PEN-20;PEN-19;Little LEN;Big LEN	yes	yes	2	0.0096294	80.69			By MS/MS		By MS/MS
AKFEELNMDLFR	DFSETLTRAKFEELNM	ELNMDLFRSTMKPVQK	R	A	K	F	R	S	1	1	1	1	0	0	2	0	0	0	2	1	1	2	0	0	0	0	0	0	0	0	12	1	1511.74	Q3U9G2;Q3TWF2;P20029;Q9DC41;Q3TKF8;Q3TI47;Q3U7T8;Q3U6V3;Q3UEM8;Q3TUS2	Q3U9G2	326	337	Hspa5	78 kDa glucose-regulated protein	yes	no	3	0.00093658	91.202		By matching			By MS/MS
ALLTPVAIAAGR	AVGDVCGKALLTPVAI	PVAIAAGRKLAHRLFE	K	A	L	G	R	K	4	1	0	0	0	0	0	1	0	1	2	0	0	0	1	0	1	0	0	1	0	0	12	0	1151.7	Q91Z57;Q3U9R7;Q3UB84;Q3UAS7;Q3TXK9;Q3TWI5;P47791-2;P47791	Q91Z57	233	244	Gsr	Glutathione reductase, mitochondrial	yes	no	2	0.00010212	96.229					By MS/MS
ALPWSPAQINTR	GTLDRPLKALPWSPAQ	SPAQINTRFLLYTNEN	K	A	L	T	R	F	2	1	1	0	0	1	0	0	0	1	1	0	0	0	2	1	1	1	0	0	0	0	12	0	1352.72	Q6P8U6;Q9D950	Q6P8U6	43	54	Pnlip;mCG_10680	Pancreatic triacylglycerol lipase;Triacylglycerol lipase	yes	no	2	2.2865e-05	126.66	By MS/MS	By MS/MS	By MS/MS	By matching
ANGEVIVEIPTR	NFEPRALKANGEVIVE	VIVEIPTRACEGQENA	K	A	N	T	R	A	1	1	1	0	0	0	2	1	0	2	0	0	0	0	1	0	1	0	0	2	0	0	12	0	1296.7	Q32MU0;P63239	Q32MU0	481	492	Pcsk1	Neuroendocrine convertase 1	yes	no	2	0.0016665	93.766			By MS/MS
APLDIPVPDPVK	EANLSNLKAPLDIPVP	IPVPDPVKEKEKEERK	K	A	P	V	K	E	1	0	0	2	0	0	0	0	0	1	1	1	0	0	4	0	0	0	0	2	0	0	12	0	1259.71	G3UWN9;G3UXY0;G3X9K9;G3UXZ5;Q5HZK3;P97371	G3UWN9	48	59	Psme1	Proteasome activator complex subunit 1	yes	no	2	0.0026495	87.216			By matching
AQQPLKQQQPPK	ALQGAKERAQQPLKQQ	LKQQQPPKQQQQQQQQ	R	A	Q	P	K	Q	1	0	0	0	0	5	0	0	0	0	1	2	0	0	3	0	0	0	0	0	0	0	12	1	1389.77	P26339	P26339	91	102	Chga	Chromogranin-A;Pancreastatin;Beta-granin;WE-14;Catestatin;GE-25;Serpinin-RRG;Serpinin;p-Glu serpinin precursor	yes	yes	2	0.00059521	115.29				By MS/MS
ASGIIDTLFQDR	AMQDSFARASGIIDTL	IDTLFQDRFFARELHD	R	A	S	D	R	F	1	1	0	2	0	1	0	1	0	2	1	0	0	1	0	1	1	0	0	0	0	0	12	0	1334.68	Q9JK98;Q549A5;Q06890;E9Q9B8;E9PUU2;E9PXG5;E9Q8Y5	Q9JK98	106	117	Clu	Clusterin;Clusterin;Clusterin beta chain;Clusterin alpha chain	yes	no	2	0.0046109	92.856
ASGPPVSELITK	KPAGVRRKASGPPVSE	PVSELITKAVAASKER	K	A	S	T	K	A	1	0	0	0	0	0	1	1	0	1	1	1	0	0	2	2	1	0	0	1	0	0	12	0	1197.66	Q5SZA3;Q3U292;Q149Z9;P15864;P43277	Q5SZA3	35	46	Hist1h1c;Hist1h1d	Histone H1.2;Histone H1.3	yes	no	2	0.0015206	94.738			By MS/MS
ASGVAVSDGVIK	________________	AVSDGVIKVFNDMKVR	M	A	S	I	K	V	2	0	0	1	0	0	0	2	0	1	0	1	0	0	0	2	0	0	0	3	0	0	12	0	1101.6	Q544Y7;P18760;F8WGL3;Q9CX22	Q544Y7	2	13	Cfl1	Cofilin-1	yes	no	2	0.00072155	95.417			By MS/MS		By MS/MS
ASGVQVADEVCR	________________	QVADEVCRIFYDMKVR	M	A	S	C	R	I	2	1	0	1	1	1	1	1	0	0	0	0	0	0	0	1	0	0	0	3	0	0	12	0	1289.6	Q4FK36;Q9R0P5	Q4FK36	2	13	Dstn	Destrin	yes	no	2	0.00095987	92.295			By matching
AVLDKLHNLNTK	HMWPGDIKAVLDKLHN	KLHNLNTKWFSQGSRP	K	A	V	T	K	W	1	0	2	1	0	0	0	0	1	0	3	2	0	0	0	0	1	0	0	1	0	0	12	1	1364.78	Q8C5B4;E9PV85;Q61297;P00688	P00688	221	232	Amy2a1;Amy2	Alpha-amylase;Pancreatic alpha-amylase	no	no	2	3.5722e-21	229.4		By MS/MS
AVTSEIAVLQSR	KSLETEHKAVTSEIAV	EIAVLQSRLKTEGSDL	K	A	V	S	R	L	2	1	0	0	0	1	1	0	0	1	1	0	0	0	0	2	1	0	0	2	0	0	12	0	1272.7	Q5RKP4;Q8BMR3;Q3U900;Q91YQ5;Q99LY0	Q5RKP4	525	536	Rpn1	Dolichyl-diphosphooligosaccharide--protein glycosyltransferase subunit 1	yes	no	2	0.021268	67.118
CLYASVLTAQPR	QIIPTARRCLYASVLT	SVLTAQPRLMEPIYLV	R	C	L	P	R	L	2	1	0	0	1	1	0	0	0	0	2	0	0	0	1	1	1	0	1	1	0	0	12	0	1377.71	Q8C153;Q3UZ14;Q3UMI7;Q3UDC8;Q3TX47;Q3TWX1;Q3TLB1;Q3TJZ1;P58252;Q6P9L9;Q8BMA8;Q3TW58;Q3UBL9;Q3TK17;Q3TSK4;Q3TPG2;Q99LT6;Q61509	Q8C153	728	739	Eef2	Elongation factor 2	yes	no	2	0.00028637	108.56
CVLEVISDSLSK	KGDTKVMKCVLEVISD	VISDSLSKPSPMPVSP	K	C	V	S	K	P	0	0	0	1	1	0	1	0	0	1	2	1	0	0	0	3	0	0	0	2	0	0	12	0	1348.69	P26339	P26339	35	46	Chga	Chromogranin-A;Pancreastatin;Beta-granin;WE-14;Catestatin;GE-25;Serpinin-RRG;Serpinin;p-Glu serpinin precursor	yes	yes	2	3.1284e-05	123.95	By MS/MS		By MS/MS		By MS/MS
DAGQISGLNVLR	DSQRQATKDAGQISGL	ISGLNVLRVINEPTAA	K	D	A	L	R	V	1	1	1	1	0	1	0	2	0	1	2	0	0	0	0	1	0	0	0	1	0	0	12	0	1241.67	P38647	P38647	207	218	Hspa9	Stress-70 protein, mitochondrial	yes	yes	2	0.0018341	89.189
DAGTIAGLNVLR	DSQRQATKDAGTIAGL	IAGLNVLRIINEPTAA	K	D	A	L	R	I	2	1	1	1	0	0	0	2	0	1	2	0	0	0	0	0	1	0	0	1	0	0	12	0	1198.67	Q3UBA6;Q3TZJ3;Q3TH56;Q3TEK2;P63017;Q504P4;Q3U9L2;Q3TF16;Q3TQ13;Q3UDS0;Q3ULM1;Q3TRH3;Q3TB63;Q3KQJ4;Q3TH04	Q3UBA6	160	171	Hspa8	Heat shock cognate 71 kDa protein	yes	no	2	6.4094e-10	164.65			By MS/MS		By MS/MS
DAGTIAGLNVMR	DAQRQATKDAGTIAGL	IAGLNVMRIINEPTAA	K	D	A	M	R	I	2	1	1	1	0	0	0	2	0	1	1	0	1	0	0	0	1	0	0	1	0	0	12	0	1216.62	Q3U9G2;Q3TWF2;P20029;Q9DC41;Q3TKF8;Q3TI47;Q3U7T8;Q3U6V3;Q3UEM8	Q3U9G2	187	198	Hspa5	78 kDa glucose-regulated protein	yes	no	2	1.1558e-06	135.99	By MS/MS		By MS/MS		By MS/MS
DEETGLCLLPLK	QLKERCIKDEETGLCL	GLCLLPLKEKKKQVQT	K	D	E	L	K	E	0	0	0	1	1	0	2	1	0	0	4	1	0	0	1	0	1	0	0	0	0	0	12	0	1386.71	E9Q557;E9PZW0;Q8BP77	E9Q557	2448	2459	Dsp	Desmoplakin	yes	no	2	0.0036823	84.605			By MS/MS
DFTPVCTTELGR	GILFSHPRDFTPVCTT	VCTTELGRAAKLAPEF	R	D	F	G	R	A	0	1	0	1	1	0	1	1	0	0	1	0	0	1	1	0	3	0	0	1	0	0	12	0	1394.65	Q53ZU7;O08709;Q6GT24;D3Z0Y2;Q6A0D0;Q8BG37	Q53ZU7	42	53	Prdx6;Prdx6b	Peroxiredoxin-6	yes	no	2	0.00028637	108.56
DGEEAGAYDGPR	YPTLKIFRDGEEAGAY	AGAYDGPRTADGIVSH	R	D	G	P	R	T	2	1	0	2	0	0	2	3	0	0	0	0	0	0	1	0	0	0	1	0	0	0	12	0	1235.51	P27773;F6Q404	P27773	108	119	Pdia3	Protein disulfide-isomerase A3	yes	no	2	9.3017e-07	138.63			By MS/MS		By MS/MS
DGNGYISAAELR	EAFRVFDKDGNGYISA	YISAAELRHVMTNLGE	K	D	G	L	R	H	2	1	1	1	0	0	1	2	0	1	1	0	0	0	0	1	0	0	1	0	0	0	12	0	1264.6	P62204;Q3UKW2	P62204	96	107	Calm1	Calmodulin	yes	no	2	0.00085541	109.16
DICNDVLSLLEK	EKIETELRDICNDVLS	DVLSLLEKFLIPNASQ	R	D	I	E	K	F	0	0	1	2	1	0	1	0	0	1	3	1	0	0	0	1	0	0	0	1	0	0	12	0	1417.71	P63101	P63101	92	103	Ywhaz	14-3-3 protein zeta/delta	yes	yes	2	6.9562e-07	141.37			By MS/MS		By MS/MS
DLEEDHACIPIK	LHLEICLKDLEEDHAC	DHACIPIKKSDPVVSY	K	D	L	I	K	K	1	0	0	2	1	0	2	0	1	2	1	1	0	0	1	0	0	0	0	0	0	0	12	0	1438.68	Q8C153;Q3UZ14;Q3UMI7;Q3UDC8;Q3TX47;Q3TWX1;Q3TLB1;Q3TJZ1;P58252;Q6P9L9;Q8BMA8;Q3TW58;Q3UBL9;Q3TK17;Q3TSK4;Q3TPG2	Q8C153	560	571	Eef2	Elongation factor 2	yes	no	3	0.046565	40.015			By matching
DLFSDGHSEFLK	ASVVGFFRDLFSDGHS	DGHSEFLKAASNLRDN	R	D	L	L	K	A	0	0	0	2	0	0	1	1	1	0	2	1	0	2	0	2	0	0	0	0	0	0	12	0	1393.65	P27773	P27773	162	173	Pdia3	Protein disulfide-isomerase A3	yes	yes	2;3	4.5096e-10	167.84	By matching		By MS/MS
DLGTDSQIFISR	ISDLFVPKDLGTDSQI	DSQIFISRAYDATTHF	K	D	L	S	R	A	0	1	0	2	0	1	0	1	0	2	1	0	0	1	0	2	1	0	0	0	0	0	12	0	1350.68	Q3UUX9;Q3TIY6;Q3UC72;Q3UPA3;Q61598-2;Q61598	Q3UUX9	391	402	Gdi2	Rab GDP dissociation inhibitor beta	yes	no	2	7.2306e-06	131.69			By matching		By matching
DNIQGITKPAIR	KRHRKVLRDNIQGITK	GITKPAIRRLARRGGV	R	D	N	I	R	R	1	1	1	1	0	1	0	1	0	3	0	1	0	0	1	0	1	0	0	0	0	0	12	1	1324.75	B2RTM0;P62806	B2RTM0	25	36	Hist2h4;Hist1h4a	Histone H4	yes	no	2;3	4.0329e-06	140.57					By MS/MS
DSVVAGFQWATK	VQYLNEIKDSVVAGFQ	AGFQWATKEGALCEEN	K	D	S	T	K	E	2	0	0	1	0	1	0	1	0	0	0	1	0	1	0	1	1	1	0	2	0	0	12	0	1307.65	Q8C153;Q3UZ14;Q3UMI7;Q3UDC8;Q3TX47;Q3TWX1;Q3TLB1;Q3TJZ1;P58252;Q6P9L9;Q8BMA8;Q3TW58;Q3UBL9;Q3TK17;Q3TSK4;Q3TPG2;Q99LT6;Q61509	Q8C153	677	688	Eef2	Elongation factor 2	yes	no	2	0.010668	78.705
DSYVGDEAQSKR	VMVGMGQKDSYVGDEA	GDEAQSKRGILTLKYP	K	D	S	K	R	G	1	1	0	2	0	1	1	1	0	0	0	1	0	0	0	2	0	0	1	1	0	0	12	1	1353.62	Q3UAF7;Q3UAF6;Q3U5R4;B2RRX1;P60710;Q3UAA9;Q3UA89;Q3U939;Q3U804;Q61276;Q3TIJ9;Q3UCF8;E9Q5F4;G3UZ07;Q61272;A1E281;E9Q606;Q8CF71;V9GXQ2;Q4KL81;P63260;Q3UD81;G3UYG0;Q3UBP6;Q3UBQ4;Q9QZ83	Q3UAF7	51	62	Actb;Actg1;Acta1;Acta2;Gm17087	Actin, cytoplasmic 1;Actin, cytoplasmic 1, N-terminally processed;Actin, cytoplasmic 2;Actin, cytoplasmic 2, N-terminally processed	no	no	2;3	7.381e-12	196.27		By MS/MS		By MS/MS	By MS/MS
EGDVLTLLESER	RNVKGPVREGDVLTLL	LTLLESEREARRLR__	R	E	G	E	R	E	0	1	0	1	0	0	3	1	0	0	3	0	0	0	0	1	1	0	0	1	0	0	12	0	1359.69	G3UYV7;Q059I1;P62858	G3UYV7	39	50	Rps28	40S ribosomal protein S28	yes	no	2	0.00050083	101.53			By matching
EGLELPEDEEEK	KSLVSVTKEGLELPED	LPEDEEEKKKMEESKA	K	E	G	E	K	K	0	0	0	1	0	0	6	1	0	0	2	1	0	0	1	0	0	0	0	0	0	0	12	0	1415.63	Q80Y52;Q3UIF3;Q3TKA2;P07901;Q3TJU7;A0PJ91;Q71LX8;P11499;Q80YC2;Q811H6	Q71LX8	539	550	Hsp90aa1;Hsp90ab1	Heat shock protein HSP 90-alpha;Heat shock protein HSP 90-beta	no	no	2	0.00048419	101.64			By MS/MS
EGVVECSFVQSK	LVDAMNGKEGVVECSF	ECSFVQSKETECTYFS	K	E	G	S	K	E	0	0	0	0	1	1	2	1	0	0	0	1	0	1	0	2	0	0	0	3	0	0	12	0	1367.64	P08249	P08249	270	281	Mdh2	Malate dehydrogenase, mitochondrial	yes	yes	2	0.0027161	86.772			By MS/MS
EILMLKQTKSVK	LDKVFDSKEILMLKQT	LKQTKSVKKPYKCSEC	K	E	I	V	K	K	0	0	0	0	0	1	1	0	0	1	2	3	1	0	0	1	1	0	0	1	0	0	12	2	1416.84	J3QM38	J3QM38	169	180	Gm4944		yes	yes	2	0.023788	69.721				By MS/MS
ELEEIVQPIISK	EDFKAKKKELEEIVQP	IVQPIISKLYGSGGPP	K	E	L	S	K	L	0	0	0	0	0	1	3	0	0	3	1	1	0	0	1	1	0	0	0	1	0	0	12	0	1396.78	Q3U9G2;Q3TWF2;P20029;Q9DC41;Q3TKF8;Q3TI47;Q3U6V3	Q3U9G2	623	634	Hspa5	78 kDa glucose-regulated protein	yes	no	2	6.1526e-10	164.81	By MS/MS	By matching	By MS/MS		By MS/MS
ELISNASDALDK	KNKEIFLRELISNASD	NASDALDKIRLISLTD	R	E	L	D	K	I	2	0	1	2	0	0	1	0	0	1	2	1	0	0	0	2	0	0	0	0	0	0	12	0	1274.64	Q91V38;Q3UAD6;P08113;Q3UBU0;Q8C2R2;Q71LX8;P11499;D3Z1R1;E9PX27	Q91V38	103	114	Hsp90b1;Hsp90ab1	Endoplasmin;Heat shock protein HSP 90-beta	no	no	2	4.1767e-05	120.57			By MS/MS		By MS/MS
EMAPAWEALAEK	APWCSHCKEMAPAWEA	AWEALAEKYKDREDIV	K	E	M	E	K	Y	4	0	0	0	0	0	3	0	0	0	1	1	1	0	1	0	0	1	0	0	0	0	12	0	1344.64	D3Z6P0-2;D3Z6P0;F6Q519	D3Z6P0-2	423	434	Pdia2	Protein disulfide-isomerase A2	yes	no	2	0.017457	68.463			By matching
EPGCGCCSVCAR	APCAELVREPGCGCCS	GCCSVCARQEGEACGV	R	E	P	A	R	Q	1	1	0	0	4	0	1	2	0	0	0	0	0	0	1	1	0	0	0	1	0	0	12	0	1411.51	P47877	P47877	65	76	Igfbp2	Insulin-like growth factor-binding protein 2	yes	yes	2	2.7123e-09	151.79		By matching		By MS/MS	By MS/MS
EQFLDGDAWTNR	ADPAIYFKEQFLDGDA	DGDAWTNRWVESKHKS	K	E	Q	N	R	W	1	1	1	2	0	1	1	1	0	0	1	0	0	1	0	0	1	1	0	0	0	0	12	0	1450.65	B2MWM9;P14211;Q3UWP8	B2MWM9	25	36	Calr	Calreticulin	yes	no	2	3.2144e-10	172.11			By MS/MS		By MS/MS
ETVQTTEDQILK	SNLVRVGKETVQTTED	TTEDQILKRDMPPAFI	K	E	T	L	K	R	0	0	0	1	0	2	2	0	0	1	1	1	0	0	0	0	3	0	0	1	0	0	12	0	1403.71	Q64727;Q3TEB0	Q64727	60	71	Vcl;Pspc1	Vinculin	yes	no	2	0.010256	79.492
EVDEQMLNVQNK	FRGRMSMKEVDEQMLN	QMLNVQNKNSSYFVEW	K	E	V	N	K	N	0	0	2	1	0	2	2	0	0	0	1	1	1	0	0	0	0	0	0	2	0	0	12	0	1445.68	B2RSN3;Q9CWF2;Q7TMM9;Q99J49;P68372;Q9DCR1;P99024;Q80ZV2	P68372	325	336	Tubb2b;Tubb2a;Tubb4b;Tubb5	Tubulin beta-2B chain;Tubulin beta-2A chain;Tubulin beta-4B chain;Tubulin beta-5 chain	no	no	2	5.5333e-14	202.68			By MS/MS
FLASVSTVLTSK	AVHASLDKFLASVSTV	VSTVLTSKYR______	K	F	L	S	K	Y	1	0	0	0	0	0	0	0	0	0	2	1	0	1	0	3	2	0	0	2	0	0	12	0	1251.71	Q9CY10;Q91VB8;Q8BPF4;A8DUV3;P01942;Q9CWS5;Q61287;A8DUV1	Q9CY10	129	140	haemaglobin alpha 2;Hbat1;Hba	Hemoglobin subunit alpha	yes	no	2	1.095e-06	136.7	By MS/MS		By MS/MS
FLGDSAAGMAIK	VTLKENERFLGDSAAG	SAAGMAIKNPKATLRY	R	F	L	I	K	N	3	0	0	1	0	0	0	2	0	1	1	1	1	1	0	1	0	0	0	0	0	0	12	0	1179.6	Q9JKR6;Q8VCI2;E0CYZ2	Q9JKR6	80	91	Hyou1	Hypoxia up-regulated protein 1	yes	no	2	0.0064864	80.245			By matching
FLIPNASQPESK	DVLSLLEKFLIPNASQ	NASQPESKVFYLKMKG	K	F	L	S	K	V	1	0	1	0	0	1	1	0	0	1	1	1	0	1	2	2	0	0	0	0	0	0	12	0	1329.69	P63101	P63101	104	115	Ywhaz	14-3-3 protein zeta/delta	yes	yes	2	0.0031356	100.09
FSTWINQVMAYN	AMYTRVSKFSTWINQV	INQVMAYN________	K	F	S	Y	N	-	1	0	2	0	0	1	0	0	0	1	0	0	1	1	0	1	1	1	1	1	0	0	12	0	1472.68	Q9ER05;Q9D960;Q9DC82	Q9ER05	253	264	Ctrl		yes	no	2	0.0095918	75.416	By MS/MS	By matching
FVEGLPINDFSR	VIKNKTWKFVEGLPIN	LPINDFSREKMDLTAK	K	F	V	S	R	E	0	1	1	1	0	0	1	1	0	1	1	0	0	2	1	1	0	0	0	1	0	0	12	0	1392.7	P14152	P14152	299	310	Mdh1	Malate dehydrogenase, cytoplasmic	yes	yes	2	3.6117e-05	122.39	By matching		By MS/MS		By MS/MS
GDACDDDIDGDR	KDTDLDGRGDACDDDI	DDDIDGDRIRNVADNC	R	G	D	D	R	I	1	1	0	6	1	0	0	2	0	1	0	0	0	0	0	0	0	0	0	0	0	0	12	0	1322.47	Q8VI54;Q9R0G6	Q8VI54	366	377	Comp	Cartilage oligomeric matrix protein	yes	no	2	7.5906e-07	140.63	By MS/MS		By matching		By matching
GEAAGAVQELAR	RLRRAVPRGEAAGAVQ	GAVQELARALAHLLEA	R	G	E	A	R	A	4	1	0	0	0	1	2	2	0	0	1	0	0	0	0	0	0	0	0	1	0	0	12	0	1170.6	Q9QXV0	Q9QXV0	66	77	Pcsk1n	ProSAAS;KEP;Big SAAS;Little SAAS;Big PEN-LEN;PEN;PEN-20;PEN-19;Little LEN;Big LEN	yes	yes	2	0.0011116	97.463			By MS/MS
GECWCVNPNTGK	KMSLNGQRGECWCVNP	CVNPNTGKPIQGAPTI	R	G	E	G	K	P	0	0	2	0	2	0	1	2	0	0	0	1	0	0	1	0	1	1	0	1	0	0	12	0	1420.59	P47877;D3YU40;Q9D057	P47877	261	272	Igfbp2	Insulin-like growth factor-binding protein 2	yes	no	2	7.8986e-06	135.08
GFPTIYFSPANK	VPSPYEVKGFPTIYFS	IYFSPANKKLTPKKYE	K	G	F	N	K	K	1	0	1	0	0	0	0	1	0	1	0	1	0	2	2	1	1	0	1	0	0	0	12	0	1340.68	P27773	P27773	449	460	Pdia3	Protein disulfide-isomerase A3	yes	yes	2	2.0319e-09	156.01	By matching		By MS/MS		By MS/MS
GIHETTFNSIMK	SFLGIESRGIHETTFN	TTFNSIMKCDVDIRKD	R	G	I	M	K	C	0	0	1	0	0	0	1	1	1	2	0	1	1	1	0	1	2	0	0	0	0	0	12	0	1376.68	Q8BFZ3	Q8BFZ3	274	285	Actbl2	Beta-actin-like protein 2	yes	yes	3	0.051813	39.111
GSNELNETLLQR	GLVCFRLKGSNELNET	LNETLLQRINSAKKIH	K	G	S	Q	R	I	0	1	2	0	0	1	2	1	0	0	3	0	0	0	0	1	1	0	0	0	0	0	12	0	1372.69	Q5SUV8;O88533	Q5SUV8	415	426	Ddc	Aromatic-L-amino-acid decarboxylase	yes	no	2	1.252e-09	160.86			By matching
GTVTDFPGFDGR	________________	DFPGFDGRADAEVLRK	R	G	T	G	R	A	0	1	0	2	0	0	0	3	0	0	0	0	0	2	1	0	2	0	0	1	0	0	12	0	1267.58	P48036;A0A0G2JGQ0	P48036	5	16	Anxa5	Annexin A5	yes	no	2	6.4845e-06	131.93	By matching		By MS/MS
HILESQFDSHTR	EVLISNVKHILESQFD	SQFDSHTRASGHSYTK	K	H	I	T	R	A	0	1	0	1	0	1	1	0	2	1	1	0	0	1	0	2	1	0	0	0	0	0	12	0	1468.71	B2RS76	B2RS76	97	108	Cpb1		yes	yes	3	7.2613e-05	112.73	By MS/MS		By MS/MS
HLIPAANTGESK	DILDVLDKHLIPAANT	AANTGESKVFYYKMKG	K	H	L	S	K	V	2	0	1	0	0	0	1	1	1	1	1	1	0	0	1	1	1	0	0	0	0	0	12	0	1236.65	Q5SS40;P62259;Q8BPH1;F6WA09	Q5SS40	107	118	Ywhae	14-3-3 protein epsilon	yes	no	2	0.00052371	101.38
HPEAEMAQNSVR	ALRHLTSRHPEAEMAQ	EMAQNSVRLNYGIPAI	R	H	P	V	R	L	2	1	1	0	0	1	2	0	1	0	0	0	1	0	1	1	0	0	0	1	0	0	12	0	1367.63	Q02257	Q02257	466	477	Jup	Junction plakoglobin	yes	yes	2	1.1242e-05	130.4	By MS/MS		By matching
HSQGTFTSDYSK	DEMNEDKRHSQGTFTS	TFTSDYSKYLDSRRAQ	R	H	S	S	K	Y	0	0	0	1	0	1	0	1	1	0	0	1	0	1	0	3	2	0	1	0	0	0	12	0	1356.59	P55095;A2AS86	P55095	53	64	Gcg	Glucagon;Glicentin;Glicentin-related polypeptide;Oxyntomodulin;Glucagon;Glucagon-like peptide 1;Glucagon-like peptide 1(7-37);Glucagon-like peptide 1(7-36);Glucagon-like peptide 2	yes	no	2	2.4832e-16	226.23
HVGDLGNVTAGK	GGPADEERHVGDLGNV	LGNVTAGKDGVANVSI	R	H	V	G	K	D	1	0	1	1	0	0	0	3	1	0	1	1	0	0	0	0	1	0	0	2	0	0	12	0	1166.6	P08228	P08228	81	92	Sod1	Superoxide dismutase [Cu-Zn]	yes	yes	2	7.3167e-06	131.66			By MS/MS
IAATILTSPDLR	NPPLNGARIAATILTS	ILTSPDLRKQWLQEVK	R	I	A	L	R	K	2	1	0	1	0	0	0	0	0	2	2	0	0	0	1	1	2	0	0	0	0	0	12	0	1269.73	P05202	P05202	326	337	Got2	Aspartate aminotransferase, mitochondrial	yes	yes	2	7.9191e-07	140.24			By matching
IILDLISESPIK	DRLVECIKIILDLISE	LISESPIKGRAQPYDP	K	I	I	I	K	G	0	0	0	1	0	0	1	0	0	4	2	1	0	0	1	2	0	0	0	0	0	0	12	0	1339.8	Q3TG17;H3BLL4;B2M1R6;Q3U9Q3;Q3U6X2;Q3TUA1;Q3TJ38;Q5FWJ5;Q3TL71;P61979-3;P61979;P61979-2;H3BLP7;D3Z5X4;D3YWG1;H3BK96;H3BKD0	Q3TG17	139	150	Hnrnpk;Gm7964	Heterogeneous nuclear ribonucleoprotein K	yes	no	2	0.00067435	100.38	By matching		By matching
ILGTTVKLMELK	TRPWIFNKILGTTVKL	TVKLMELKSNTSYCLT	K	I	L	L	K	S	0	0	0	0	0	0	1	1	0	1	3	2	1	0	0	0	2	0	0	1	0	0	12	1	1344.81	B2RQ03;Q9D2H8-2;Q9D2H8	B2RQ03	235	246	Fndc8	Fibronectin type III domain-containing protein 8	yes	no	3	0.018304	52.391				By matching	By MS/MS
IMNVIGEPIDER	VGPETLGRIMNVIGEP	IGEPIDERGPIKTKQF	R	I	M	E	R	G	0	1	1	1	0	0	2	1	0	3	0	0	1	0	1	0	0	0	0	1	0	0	12	0	1384.7	P56480	P56480	144	155	Atp5b	ATP synthase subunit beta, mitochondrial	yes	yes	2	0.0014186	110.31					By MS/MS
INVNEIFYDLVR	LESSAKSKINVNEIFY	EIFYDLVRQINRKTPV	K	I	N	V	R	Q	0	1	2	1	0	0	1	0	0	2	1	0	0	1	0	0	0	0	1	2	0	0	12	0	1493.79	A0A0G2JDL9;Q52L50;Q3U7U8;C5H0E9;C5H0E8;Q99JI6;P62835	A0A0G2JDL9	86	97	Rap1b;Rap1a;Gm9392	Ras-related protein Rap-1b;Ras-related protein Rap-1A	yes	no	2	0.00016562	113.24	By matching	By matching		By matching	By MS/MS
INVYYNEATGGK	DSDLQLERINVYYNEA	YNEATGGKYVPRAVLV	R	I	N	G	K	Y	1	0	2	0	0	0	1	2	0	1	0	1	0	0	0	0	1	0	2	1	0	0	12	0	1327.64	P68372;Q9CVR0	P68372	47	58	Tubb4b	Tubulin beta-4B chain	yes	no	2	0.0043123	83.455			By matching
IQFNESFAEMNR	DEKVQLYRIQFNESFA	ESFAEMNRGTNEWKTV	R	I	Q	N	R	G	1	1	2	0	0	1	2	0	0	1	0	0	1	2	0	1	0	0	0	0	0	0	12	0	1484.67	M0QWX7;A2RSV8;P19783	M0QWX7	31	42	Cox4i1	Cytochrome c oxidase subunit 4 isoform 1, mitochondrial	yes	no	2	0.00036164	105.65
IQTQPGYANTLR	PMEAAKVRIQTQPGYA	PGYANTLREAVPKMYK	R	I	Q	L	R	E	1	1	1	0	0	2	0	1	0	1	1	0	0	0	1	0	2	0	1	0	0	0	12	0	1360.71	Q3UB63;Q3U995;Q3THU8;G5E902;Q8VEM8	Q3UB63	185	196	Slc25a3	Phosphate carrier protein, mitochondrial	yes	no	2	0.0027161	86.772
ISVYYNEATGGK	DSDLQLDRISVYYNEA	YNEATGGKYVPRAILV	R	I	S	G	K	Y	1	0	1	0	0	0	1	2	0	1	0	1	0	0	0	1	1	0	2	1	0	0	12	0	1300.63	P99024	P99024	47	58	Tubb5	Tubulin beta-5 chain	yes	yes	2	0.053892	55.604			By matching
ITLPVDFVTADK	KAEKNGVKITLPVDFV	VDFVTADKFDENAKTG	K	I	T	D	K	F	1	0	0	2	0	0	0	0	0	1	1	1	0	1	1	0	2	0	0	2	0	0	12	0	1317.72	P09411	P09411	280	291	Pgk1	Phosphoglycerate kinase 1	yes	yes	2	0.0038367	84.365			By MS/MS
IVLDNSVFSEHR	ELIELLEKIVLDNSVF	NSVFSEHRNLQNLLIL	K	I	V	H	R	N	0	1	1	1	0	0	1	0	1	1	1	0	0	1	0	2	0	0	0	2	0	0	12	0	1414.72	Q5SXR6;Q68FD5;Q80U89;Q3UPJ3	Q5SXR6	1015	1026	Cltc;mKIAA0034	Clathrin heavy chain;Clathrin heavy chain 1	yes	no	3	0.0010073	88.338			By matching
IYYGTEAQIGER	YVLNESGRIYYGTEAQ	TEAQIGERTWNYGQFD	R	I	Y	E	R	T	1	1	0	0	0	1	2	2	0	2	0	0	0	0	0	0	1	0	2	0	0	0	12	0	1398.68	A0A0R4J293;Q9JLF6	A0A0R4J293	274	285	Tgm1	Protein-glutamine gamma-glutamyltransferase K	yes	no	2	0.049844	58.32			By matching
LICCDILDVLDK	QMVETELKLICCDILD	DILDVLDKHLIPAANT	K	L	I	D	K	H	0	0	0	3	2	0	0	0	0	2	3	1	0	0	0	0	0	0	0	1	0	0	12	0	1475.74	Q5SS40;P62259;D6REF3;F6WA09	Q5SS40	95	106	Ywhae	14-3-3 protein epsilon	yes	no	2	3.1284e-05	123.95	By MS/MS	By matching	By MS/MS	By matching	By MS/MS
LIDLHSPSEIVK	FQMRIHKRLIDLHSPS	HSPSEIVKQITSISIE	R	L	I	V	K	Q	0	0	0	1	0	0	1	0	1	2	2	1	0	0	1	2	0	0	0	1	0	0	12	0	1349.76	Q5BLK2;P60867	Q5BLK2	88	99	Rps20	40S ribosomal protein S20	yes	no	3	0.00014682	105.65			By matching
LLDSSTVTHLFK	TQKKVPDKLLDSSTVT	STVTHLFKITESIGCV	K	L	L	F	K	I	0	0	0	1	0	0	0	0	1	0	3	1	0	1	0	2	2	0	0	1	0	0	12	0	1359.74	E0CXB1;Q9QUM9	E0CXB1	41	52	Psma6	Proteasome subunit alpha type-6	yes	no	3	0.0021961	81.92			By matching
LLNDEDPVVVTK	RALPELTKLLNDEDPV	EDPVVVTKAAMIVNQL	K	L	L	T	K	A	0	0	1	2	0	0	1	0	0	0	2	1	0	0	1	0	1	0	0	3	0	0	12	0	1340.72	Q02257	Q02257	150	161	Jup	Junction plakoglobin	yes	yes	2	0.00011054	115.37			By MS/MS
LLNQPNQWPLVK	YGIPAIVKLLNQPNQW	PNQWPLVKATIGLIRN	K	L	L	V	K	A	0	0	2	0	0	2	0	0	0	0	3	1	0	0	2	0	0	1	0	1	0	0	12	0	1448.81	Q02257	Q02257	488	499	Jup	Junction plakoglobin	yes	yes	2	2.5216e-10	174.4	By MS/MS		By MS/MS
LNDSILQATEQR	DLKDEIVRLNDSILQA	ILQATEQRRRAEENAL	R	L	N	Q	R	R	1	1	1	1	0	2	1	0	0	1	2	0	0	0	0	1	1	0	0	0	0	0	12	0	1386.71	E9Q557	E9Q557	1268	1279	Dsp	Desmoplakin	yes	yes	2	8.2529e-10	163.51			By MS/MS
LVILANNCPALR	MIRQGKAKLVILANNC	ANNCPALRKSEIEYYA	K	L	V	L	R	K	2	1	2	0	1	0	0	0	0	1	3	0	0	0	1	0	0	0	0	1	0	0	12	0	1352.76	Q497D7;Q5PR15;Q58DZ3;P62889	Q497D7	45	56	Rpl30	60S ribosomal protein L30	yes	no	2	0.00059899	100.88			By matching
LVIPSELGYGER	MCEGEKRKLVIPSELG	SELGYGERGAPPKIPG	K	L	V	E	R	G	0	1	0	0	0	0	2	2	0	1	2	0	0	0	1	1	0	0	1	1	0	0	12	0	1331.71	Q3TND1;P45878	Q3TND1	102	113	Fkbp2	Peptidyl-prolyl cis-trans isomerase;Peptidyl-prolyl cis-trans isomerase FKBP2	yes	no	2	6.3456e-07	142.08	By matching		By matching		By MS/MS
MATNAAAQNAIK	REAAEGLRMATNAAAQ	AAAQNAIKKKLVQRLE	R	M	A	I	K	K	5	0	2	0	0	1	0	0	0	1	0	1	1	0	0	0	1	0	0	0	0	0	12	0	1202.61	Q3UHS6;Q80TM2;P26039	Q3UHS6	899	910	Tln1	Talin-1	yes	no	2	4.4947e-05	119.55					By MS/MS
MDDREDLVYQAK	________________	EDLVYQAKLAEQAERY	-	M	D	A	K	L	1	1	0	3	0	1	1	0	0	0	1	1	1	0	0	0	0	0	1	1	0	0	12	1	1481.68	Q5SS40;P62259;Q8BPH1;D6REF3	Q5SS40	1	12	Ywhae	14-3-3 protein epsilon	yes	no	2	2.3188e-11	188.68					By matching
MDEEEVEVFLPK	IEWTRLDKMDEEEVEV	EVEVFLPKFKLEENYN	K	M	D	P	K	F	0	0	0	1	0	0	4	0	0	0	1	1	1	1	1	0	0	0	0	2	0	0	12	0	1463.69	Q4FJQ6;Q3U3L3;Q60854;F8WIV2	Q4FJQ6	264	275	Serpinb6a;Serpinb6	Serpin B6	yes	no	2	0.0038367	84.365			By matching
MDSTANEVEAVK	HENIIIAKMDSTANEV	ANEVEAVKVHSFPTLK	K	M	D	V	K	V	2	0	1	1	0	0	2	0	0	0	0	1	1	0	0	1	1	0	0	2	0	0	12	0	1292.59	Q3UDR2;Q3URP6;Q3U738;Q3TWE3;Q3TIM0;Q3THC3;Q3TF72;P09103;Q3TGS0;Q3UBY9;Q3UJA8;Q3UA23;Q3TIQ5;E9Q8G8	Q3UDR2	427	438	P4hb	Protein disulfide-isomerase	yes	no	2	9.4532e-07	138.45			By MS/MS
MFGLMNSHAMLK	IPVKLEPRMFGLMNSH	MNSHAMLKIASVKPSD	R	M	F	L	K	I	1	0	1	0	0	0	0	1	1	0	2	1	3	1	0	1	0	0	0	0	0	0	12	0	1378.66	B1B0C7;E9PZ16;Q05793	B1B0C7	3148	3159	Hspg2	Basement membrane-specific heparan sulfate proteoglycan core protein;Endorepellin;LG3 peptide	yes	no	2	0.0067555	77.062	By matching	By matching			By MS/MS
MLELPEAFLAGR	VMMDWLGKMLELPEAF	PEAFLAGRAGEGGGVI	K	M	L	G	R	A	2	1	0	0	0	0	2	1	0	0	3	0	1	1	1	0	0	0	0	0	0	0	12	0	1345.71	Q5SUV8;O88533;Q5SUV9	Q5SUV8	125	136	Ddc	Aromatic-L-amino-acid decarboxylase	yes	no	2	2.5002e-05	125.97					By MS/MS
MRALRVSQALVR	________________	RVSQALVRSFSSSTRS	-	M	R	V	R	S	2	3	0	0	0	1	0	0	0	0	2	0	1	0	0	1	0	0	0	2	0	0	12	2	1398.82	Q792A4;P56392	Q792A4	1	12	Cox7a1	Cytochrome c oxidase subunit 7A1, mitochondrial	yes	no	1	0.0089154	114.28
MTGLVDEAIDTK	QWIDNVEKMTGLVDEA	VDEAIDTKSLLDASEE	K	M	T	T	K	S	1	0	0	2	0	0	1	1	0	1	1	1	1	0	0	0	2	0	0	1	0	0	12	0	1291.63	Q64727	Q64727	709	720	Vcl	Vinculin	yes	yes	2	1.0731e-05	130.56		By matching			By matching
MTGSEFDFEEMK	DIKDIYKRMTGSEFDF	EFDFEEMKRKKNDIYG	R	M	T	M	K	R	0	0	0	1	0	0	3	1	0	0	0	1	2	2	0	1	1	0	0	0	0	0	12	0	1449.58	Q3UUX9;Q3TIY6;Q3UC72;Q3UPA3;Q61598-2;Q61598	Q3UUX9	424	435	Gdi2	Rab GDP dissociation inhibitor beta	yes	no	2	0.052374	56.139
NIEDVIAQGVGK	VISELNGKNIEDVIAQ	VIAQGVGKLASVPAGG	K	N	I	G	K	L	1	0	1	1	0	1	1	2	0	2	0	1	0	0	0	0	0	0	0	2	0	0	12	0	1241.66	P99027	P99027	50	61	Rplp2	60S acidic ribosomal protein P2	yes	yes	2	2.9926e-05	124.39			By matching		By matching
NMICVGFLEGGK	SYPGKITKNMICVGFL	VGFLEGGKDSCQGDSG	K	N	M	G	K	D	0	0	1	0	1	0	1	3	0	1	1	1	1	1	0	0	0	0	0	1	0	0	12	0	1323.63	Q792Z1	Q792Z1	182	193	Try10		yes	yes	2	0.0074768	78.705	By matching		By MS/MS		By matching
NMPLQHLLEQIK	RKKYPCDKNMPLQHLL	QHLLEQIKELEKEREK	K	N	M	I	K	E	0	0	1	0	0	2	1	0	1	1	3	1	1	0	1	0	0	0	0	0	0	0	12	0	1462.8	E9Q557;E9PZW0	E9Q557	420	431	Dsp	Desmoplakin	yes	no	3	0.035382	46.88			By MS/MS
NNLAGAEELFAR	LALRMAVRNNLAGAEE	GAEELFARKFNALFAQ	R	N	N	A	R	K	3	1	2	0	0	0	2	1	0	0	2	0	0	1	0	0	0	0	0	0	0	0	12	0	1303.65	Q5SXR6;Q68FD5;Q80U89;Q3TAN1;Q3TYQ2;Q3U0H2	Q5SXR6	359	370	Cltc;mKIAA0034	Clathrin heavy chain;Clathrin heavy chain 1	yes	no	2	0.00025648	109.72
NSLISYLEQIHR	KSYWEDNKNSLISYLE	SYLEQIHRGVKGFVRD	K	N	S	H	R	G	0	1	1	0	0	1	1	0	1	2	2	0	0	0	0	2	0	0	1	0	0	0	12	0	1471.78	Q543R4;Q00493	Q543R4	363	374	Cpe	Carboxypeptidase E	yes	no	2;3	3.861e-10	169.98	By MS/MS		By MS/MS		By MS/MS
NTMVCAGGDGVR	SYWGSSVKNTMVCAGG	CAGGDGVRSGCQGDSG	K	N	T	V	R	S	1	1	1	1	1	0	0	3	0	0	0	0	1	0	0	0	1	0	0	2	0	0	12	0	1235.54	Q91X79	Q91X79	196	207	Cela1	Chymotrypsin-like elastase family member 1	yes	yes	2	2.5692e-07	146.5	By MS/MS	By MS/MS	By MS/MS		By MS/MS
PALELLEPIEQK	KEPEKEIRPALELLEP	LLEPIEQKFVSISDLF	R	P	A	Q	K	F	1	0	0	0	0	1	3	0	0	1	3	1	0	0	2	0	0	0	0	0	0	0	12	0	1378.77	Q3UUX9;Q3TIY6;Q3UC72;Q3UPA3;Q61598-2;Q61598	Q3UUX9	368	379	Gdi2	Rab GDP dissociation inhibitor beta	yes	no	2	8.0065e-07	140.14			By matching
QEKVTDRMDHSK	QIVDYLIRQEKVTDRM	TDRMDHSKVETETVLS	R	Q	E	S	K	V	0	1	0	2	0	1	1	0	1	0	0	2	1	0	0	1	1	0	0	1	0	0	12	2	1472.7	A0A0A6YVT7;A0A0A6YWE6;Q3UHD7;Q61137-2;Q61137	A0A0A6YVT7	85	96	Astn1	Astrotactin-1	yes	no	2	0.0038079	79.201		By matching		By MS/MS	By MS/MS
QIDDVLSVASVR	GLSNFNSRQIDDVLSV	VLSVASVRPAVLQVEC	R	Q	I	V	R	P	1	1	0	2	0	1	0	0	0	1	1	0	0	0	0	2	0	0	0	3	0	0	12	0	1300.7	Q80XJ7;Q540D7;Q3UJW9;Q9JII6;B1AXW3	Q80XJ7	168	179	Akr1a1	Alcohol dehydrogenase [NADP(+)]	yes	no	2	0.0016665	93.766
QLFHPEQLITGK	EVRTGTYRQLFHPEQL	PEQLITGKEDAANNYA	R	Q	L	G	K	E	0	0	0	0	0	2	1	1	1	1	2	1	0	1	1	0	1	0	0	0	0	0	12	0	1409.77	P05213;O89052;P68369;Q52L87;Q3TIZ0;P68373;Q5FW91;P05214;Q9JJZ2;A0A0A0MQA5;P68368;A0A087WRB4;A0A087WQS4;A0A087WSB0;A0A087WSL5	P05213	85	96	Tuba1b;Tuba1a;Tuba1c;Tuba3a;Tuba8;Tuba4a	Tubulin alpha-1B chain;Tubulin alpha-1A chain;Tubulin alpha-1C chain;Tubulin alpha-3 chain;Tubulin alpha-8 chain;Tubulin alpha-4A chain	no	no	2;3	8.2529e-10	163.51	By matching		By MS/MS
SGQLGLPDEENR	QINEEMKRSGQLGLPD	GLPDEENRRESKDQLS	R	S	G	N	R	R	0	1	1	1	0	1	2	2	0	0	2	0	0	0	1	1	0	0	0	0	0	0	12	0	1313.62	Q03517;Q4W8U9	Q03517	287	298	Scg2	Secretogranin-2;Secretoneurin;Manserin	yes	no	2	0.031458	65.895			By MS/MS
SLAEDFAEQPIK	GMVLNYSRSLAEDFAE	DFAEQPIKDAVITVPA	R	S	L	I	K	D	2	0	0	1	0	1	2	0	0	1	1	1	0	1	1	1	0	0	0	0	0	0	12	0	1346.67	Q9JKR6;Q8VCI2;F6TRP3	Q9JKR6	159	170	Hyou1	Hypoxia up-regulated protein 1	yes	no	2	0.00080587	99.5					By matching
SMGFIGHYLDQK	NGIFVLGRSMGFIGHY	IGHYLDQKRLKQGLYR	R	S	M	Q	K	R	0	0	0	1	0	1	0	2	1	1	1	1	1	1	0	1	0	0	1	0	0	0	12	0	1394.67	Q3TED3;Q3V117;Q91V92;Q8VDM8;Q3UVY4;Q99K05;Q6P063	Q3TED3	1056	1067	Acly	ATP-citrate synthase	yes	no	3	0.019362	57.792					By matching
SNVNDGVAQSTR	EKLRGWLKSNVNDGVA	DGVAQSTRIIYGGSVT	K	S	N	T	R	I	1	1	2	1	0	1	0	1	0	0	0	0	0	0	0	2	1	0	0	2	0	0	12	0	1246.59	P17751;H7BXC3	P17751	245	256	Tpi1	Triosephosphate isomerase	yes	no	2	0.0052277	82.202			By matching		By MS/MS
SPYFPNQYSQDK	MENVVNQKSPYFPNQY	PNQYSQDKALMRLPYG	K	S	P	D	K	A	0	0	1	1	0	2	0	0	0	0	0	1	0	1	2	2	0	0	2	0	0	0	12	0	1472.66	Q03517;Q4W8U9	Q03517	452	463	Scg2	Secretogranin-2;Secretoneurin;Manserin	yes	no	2	9.1897e-10	162.93			By MS/MS		By MS/MS
SWATGSPNSSNR	SGSLFLYKSWATGSPN	GSPNSSNRGYCVSLTS	K	S	W	N	R	G	1	1	2	0	0	0	0	1	0	0	0	0	0	0	1	4	1	1	0	0	0	0	12	0	1262.56	Q8C6F9;Q3TV26;P43137	Q8C6F9	83	94	Reg1	Lithostathine-1	yes	no	2	1.2317e-06	135.1	By MS/MS		By MS/MS
TEASEALPSEGK	QAVDGDGKTEASEALP	EALPSEGKGELEHSQQ	K	T	E	G	K	G	2	0	0	0	0	0	3	1	0	0	1	1	0	0	1	2	1	0	0	0	0	0	12	0	1217.58	P26339;Q3UN28	P26339	291	302	Chga	Chromogranin-A;Pancreastatin;Beta-granin;WE-14;Catestatin;GE-25;Serpinin-RRG;Serpinin;p-Glu serpinin precursor	yes	no	2	2.2986e-09	154.36	By MS/MS		By MS/MS		By MS/MS
TFCQLILDPIFK	PDGKKLPRTFCQLILD	LILDPIFKVFDAIMNF	R	T	F	F	K	V	0	0	0	1	1	1	0	0	0	2	2	1	0	2	1	0	1	0	0	0	0	0	12	0	1493.8	Q8C153;Q3UZ14;Q3UMI7;Q3UDC8;Q3TX47;Q3TWX1;Q3TLB1;Q3TJZ1;P58252;Q6P9L9;Q3TW58;Q3UBL9;Q3TK17	Q8C153	288	299	Eef2	Elongation factor 2	yes	no	2	0.00050083	101.53					By MS/MS
TFIAIKPDGVQR	________________	IKPDGVQRGLVGEIIK	R	T	F	Q	R	G	1	1	0	1	0	1	0	1	0	2	0	1	0	1	1	0	1	0	0	1	0	0	12	1	1343.76	Q5NC82;E9PZF0;Q01768;B0LAA8;Q8R4B4;Q5NC80;Q5NC79	Q5NC82	7	18	Nme2;Gm20390;Nme1	Nucleoside diphosphate kinase;Nucleoside diphosphate kinase B	no	no	2;3	9.7086e-06	127.17	By matching		By MS/MS		By MS/MS
TIAMDGTEGLVR	HLGESTVRTIAMDGTE	DGTEGLVRGQKVLDSG	R	T	I	V	R	G	1	1	0	1	0	0	1	2	0	1	1	0	1	0	0	0	2	0	0	1	0	0	12	0	1261.63	P56480	P56480	110	121	Atp5b	ATP synthase subunit beta, mitochondrial	yes	yes	2	0.0021396	90.614	By matching		By MS/MS
TINEVENQILTR	QLLTTIARTINEVENQ	VENQILTRDAKGISQE	R	T	I	T	R	D	0	1	2	0	0	1	2	0	0	2	1	0	0	0	0	0	2	0	0	1	0	0	12	0	1428.76	Q1A602;Q3ULT2;Q3UDJ7;P57780;A1BN54;Q7TPR4;Q8BP35;Q99LJ3	Q1A602	746	757	Actn4;Actn1	Alpha-actinin-4;Alpha-actinin-1	yes	no	2	2.6029e-09	152.47			By matching	By MS/MS
TLMNLGGLAVAR	KNMACVQRTLMNLGGL	LGGLAVARDDGLFSGD	R	T	L	A	R	D	2	1	1	0	0	0	0	2	0	0	3	0	1	0	0	0	1	0	0	1	0	0	12	0	1214.68	Q9WVA4	Q9WVA4	128	139	Tagln2	Transgelin-2	yes	yes	2	0.00029193	108.35		By matching	By matching	By matching	By MS/MS
TLYNNQPIDFLK	SNMVGGRKTLYNNQPI	NQPIDFLKKMVAASIK	K	T	L	L	K	K	0	0	2	1	0	1	0	0	0	1	2	1	0	1	1	0	1	0	1	0	0	0	12	0	1464.76	Q8R016;E9PY26	Q8R016	298	309	Blmh	Bleomycin hydrolase	yes	no	2	3.1284e-05	123.95	By matching		By MS/MS
TMQNTSDLDTAR	QLVAAVVRTMQNTSDL	TSDLDTARCTTSILHN	R	T	M	A	R	C	1	1	1	2	0	1	0	0	0	0	1	0	1	0	0	1	3	0	0	0	0	0	12	0	1351.6	Q02257	Q02257	192	203	Jup	Junction plakoglobin	yes	yes	2	0.00025172	112.5			By MS/MS
TNACEGKENFVR	GKLVLTLKTNACEGKE	EGKENFVRYLEHVQAV	K	T	N	V	R	Y	1	1	2	0	1	0	2	1	0	0	0	1	0	1	0	0	1	0	0	1	0	0	12	1	1423.65	Q3UZV3;Q547J8;Q3TYM6;Q3TT48;P21661	Q3UZV3	472	483	Pcsk2	Neuroendocrine convertase 2	yes	no	2	0.00077792	113.95				By MS/MS
TSFFQALGITTK	NTGLGPEKTSFFQALG	QALGITTKISRGTIEI	K	T	S	T	K	I	1	0	0	0	0	1	0	1	0	1	1	1	0	2	0	1	3	0	0	0	0	0	12	0	1312.7	Q5M8R8;Q5FWB6;P14869;S4R1N1;E9Q070	Q5M8R8	135	146	Rplp0;Gm8730	60S acidic ribosomal protein P0	yes	no	2	0.00018634	112.44
TSIAIDTIINQK	IGDRQTGKTSIAIDTI	IDTIINQKRFNDGTDE	K	T	S	Q	K	R	1	0	1	1	0	1	0	0	0	4	0	1	0	0	0	1	2	0	0	0	0	0	12	0	1315.73	D3Z6F5;Q03265	D3Z6F5	169	180	Atp5a1	ATP synthase subunit alpha;ATP synthase subunit alpha, mitochondrial	yes	no	2	2.2708e-05	126.71			By matching
TSQMKRSASLAK	IFQAGFSKTSQMKRSA	KRSASLAKLGYLDLCK	K	T	S	A	K	L	2	1	0	0	0	1	0	0	0	0	1	2	1	0	0	3	1	0	0	0	0	0	12	2	1306.7	A0A0R4J2A0;Q5SW75;Q5SW75-2;Q5SW75-4	A0A0R4J2A0	1257	1268	Ssh2	Protein phosphatase Slingshot homolog 2	yes	no	2	0.013344	61.235					By MS/MS
TVTAMDVVYALK	YTEHAKRKTVTAMDVV	MDVVYALKRQGRTLYG	K	T	V	L	K	R	2	0	0	1	0	0	0	0	0	0	1	1	1	0	0	0	2	0	1	3	0	0	12	0	1309.7	B2RTM0;P62806;Q61667	B2RTM0	81	92	Hist2h4;Hist1h4a	Histone H4	yes	no	2	0.00020719	113.22	By matching		By MS/MS		By MS/MS
TWNDPSVQQDIK	DAKRLIGRTWNDPSVQ	PSVQQDIKFLPFKVVE	R	T	W	I	K	F	0	0	1	2	0	2	0	0	0	1	0	1	0	0	1	1	1	1	0	1	0	0	12	0	1429.68	Q3U9G2;Q3TWF2;P20029;Q9DC41;Q3TKF8;Q3TI47;Q3U7T8;Q3U6V3;Q3UEM8	Q3U9G2	103	114	Hspa5	78 kDa glucose-regulated protein	yes	no	2	4.8554e-10	166.7	By MS/MS		By MS/MS		By MS/MS
VAVVAGYGDVGK	TDVMIAGKVAVVAGYG	AGYGDVGKGCAQALRG	K	V	A	G	K	G	2	0	0	1	0	0	0	3	0	0	0	1	0	0	0	0	0	0	1	4	0	0	12	0	1133.61	Q8BPI7;Q5M9P0;Q3U5U5;Q3U4D1;Q3TF14;P50247	Q8BPI7	107	118	Ahcy	Adenosylhomocysteinase	yes	no	2	0.0077216	78.324			By matching
VDCDQHSDIAQR	KNQVVFARVDCDQHSD	QHSDIAQRYRISKYPT	R	V	D	Q	R	Y	1	1	0	3	1	2	0	0	1	1	0	0	0	0	0	1	0	0	0	1	0	0	12	0	1442.62	Q3URM4;Q9D1Q6	Q3URM4	90	101	Erp44	Endoplasmic reticulum resident protein 44	yes	no	2;3	0.0024467	103.46					By MS/MS
VEMNENVLGELK	YGHHHYQRVEMNENVL	ENVLGELKKLFDAKSE	R	V	E	L	K	K	0	0	2	0	0	0	3	1	0	0	2	1	1	0	0	0	0	0	0	2	0	0	12	0	1373.69	Q80TA9	Q80TA9	349	360	Epg5	Ectopic P granules protein 5 homolog	yes	yes	2	0.0023565	93.345			By MS/MS		By matching
VENSWGEDHGHK	EGTFVKWRVENSWGED	WGEDHGHKGYLCMTDE	R	V	E	H	K	G	0	0	1	1	0	0	2	2	2	0	0	1	0	0	0	1	0	1	0	1	0	0	12	0	1393.6	Q8R016	Q8R016	394	405	Blmh	Bleomycin hydrolase	yes	yes	2	4.5519e-08	146.36			By MS/MS
VESLEQEAANER	VIQHFQEKVESLEQEA	EQEAANERQQLVETHM	K	V	E	E	R	Q	2	1	1	0	0	1	4	0	0	0	1	0	0	0	0	1	0	0	0	1	0	0	12	0	1373.64	Q3TVS1;Q3TXI9;Q3TWF3;Q53ZT3;P12023-3;P12023;Q8BPC7;Q6GR78;P12023-2	Q3TVS1	439	450	App	Amyloid beta A4 protein;N-APP;Soluble APP-alpha;Soluble APP-beta;C99;Beta-amyloid protein 42;Beta-amyloid protein 40;C83;P3(42);P3(40);C80;Gamma-secretase C-terminal fragment 59;Gamma-secretase C-terminal fragment 57;Gamma-secretase C-terminal fragment 50;C31	yes	no	2	0.00010533	115.57			By MS/MS
VGWEQLLTTIAR	NYTMEHLRVGWEQLLT	QLLTTIARTINEVENQ	R	V	G	A	R	T	1	1	0	0	0	1	1	1	0	1	2	0	0	0	0	0	2	1	0	1	0	0	12	0	1385.77	Q1A602;Q3ULT2;Q3UDJ7;P57780;A1BN54;Q7TPR4;Q8BP35;Q99LJ3	Q1A602	734	745	Actn4;Actn1	Alpha-actinin-4;Alpha-actinin-1	yes	no	2	0.00012737	114.72		By MS/MS	By MS/MS	By MS/MS	By matching
VIGSGCNLDSAR	LSGLPKHRVIGSGCNL	GCNLDSARFRYLMAEK	R	V	I	A	R	F	1	1	1	1	1	0	0	2	0	1	1	0	0	0	0	2	0	0	0	1	0	0	12	0	1247.59	P16125;D3Z7F0;A0A0N4SVV8;D3YVR7;D3YZE4;Q64483;Q548Z6;P00342;Q3UDU4;Q564E2;Q3TI99;Q3TCI7;G5E8N5;P06151;D3Z736;D3YZQ9;Q99K20;Q3THB4	P16125	159	170	Ldhb;Ldhc;Ldha	L-lactate dehydrogenase B chain;L-lactate dehydrogenase;L-lactate dehydrogenase C chain;L-lactate dehydrogenase A chain	no	no	2	0.00028176	96.745			By MS/MS
VLVQNAAGSQEK	KVLVEDTKVLVQNAAG	NAAGSQEKLAQAAQSS	K	V	L	E	K	L	2	0	1	0	0	2	1	1	0	0	1	1	0	0	0	1	0	0	0	2	0	0	12	0	1242.66	Q3UHS6;Q80TM2;P26039;Q3TBC3;Q0V930	Q3UHS6	2032	2043	Tln1	Talin-1	yes	no	2	0.00034592	106.26		By MS/MS		By MS/MS
VPAINVNDSVTK	MMSNGILKVPAINVND	NVNDSVTKSKFDNLYG	K	V	P	T	K	S	1	0	2	1	0	0	0	0	0	1	0	1	0	0	1	1	1	0	0	3	0	0	12	0	1255.68	Q8BPI7;Q5M9P0;Q3U5U5;Q3U4D1;Q3TF14;P50247	Q8BPI7	67	78	Ahcy	Adenosylhomocysteinase	yes	no	2	0.0079978	77.894			By MS/MS
VPVDGPPIDIGR	PAGASVCKVPVDGPPI	GPPIDIGRVTGPPIFN	K	V	P	G	R	V	0	1	0	2	0	0	0	2	0	2	0	0	0	0	3	0	0	0	0	2	0	0	12	0	1233.67	B9EKB8;B7ZWC4;Q07113;Q8K0J1;Q8C2F9	B9EKB8	1708	1719	Igf2r	Cation-independent mannose-6-phosphate receptor	yes	no	2	1.9233e-07	147.26		By MS/MS		By MS/MS	By MS/MS
VSFELFADKVPK	ADDEPLGRVSFELFAD	LFADKVPKTAENFRAL	R	V	S	P	K	T	1	0	0	1	0	0	1	0	0	0	1	2	0	2	1	1	0	0	0	2	0	0	12	1	1378.75	Q5SVY2;Q3UAJ1;Q3TE63;P17742;V9GXC1;V9GX31	Q5SVY2	20	31	Ppia;Gm12728	Peptidyl-prolyl cis-trans isomerase;Peptidyl-prolyl cis-trans isomerase A;Peptidyl-prolyl cis-trans isomerase A, N-terminally processed	yes	no	3	0.0029419	80.312		By MS/MS		By MS/MS	By matching
VVAGVATALAHK	AAQAAFQKVVAGVATA	VATALAHKYH______	K	V	V	H	K	Y	4	0	0	0	0	0	0	1	1	0	1	1	0	0	0	0	1	0	0	3	0	0	12	0	1135.67	Q54AH9;Q549D9;A8DV59;A8DV41;P02089;Q9QUN8;D0U293;A8DUK0;P02088;A8DUL5;A8DUP5;A8DUK2	A8DUK0	134	145	Hbb-b2;Hbbt2;Hbbt1;Hbb-b1	Hemoglobin subunit beta-2;Hemoglobin subunit beta-1	no	no	2;3	0.0001004	110.08			By MS/MS
VVDALGNAIDGK	VGEELLGRVVDALGNA	LGNAIDGKGPIGSKTR	R	V	V	G	K	G	2	0	1	2	0	0	0	2	0	1	1	1	0	0	0	0	0	0	0	2	0	0	12	0	1170.62	D3Z6F5;Q03265	D3Z6F5	100	111	Atp5a1	ATP synthase subunit alpha;ATP synthase subunit alpha, mitochondrial	yes	no	2	0.00012737	114.72			By matching
WGDIEFPPPFGR	ADYICKVKWGDIEFPP	EFPPPFGREAYPEEAY	K	W	G	G	R	E	0	1	0	1	0	0	1	2	0	1	0	0	0	2	3	0	0	1	0	0	0	0	12	0	1416.68	Q3TED3;Q3V117;Q91V92;Q3UEA1;Q3TS02	Q3TED3	233	244	Acly	ATP-citrate synthase	yes	no	2	0.0021666	90.434	By matching
YEEEQLTMACEK	NFYLAGCKYEEEQLTM	QLTMACEKWLAMNLVP	K	Y	E	E	K	W	1	0	0	0	1	1	4	0	0	0	1	1	1	0	0	0	1	0	1	0	0	0	12	0	1529.64	A0A140LIH9;A0A140LIJ9;E9Q173	A0A140LIH9	237	248	Btbd16	BTB/POZ domain-containing protein 16	yes	no	2	0.02373	54.259
YFPTQALNFAFK	GNLANVIRYFPTQALN	QALNFAFKDKYKQIFL	R	Y	F	F	K	D	2	0	1	0	0	1	0	0	0	0	1	1	0	3	1	0	1	0	1	0	0	0	12	0	1445.73	Q545A2;P51881;Q8BVI9;P48962;B2RTC8;Q3V132	Q545A2	81	92	Slc25a5;Slc25a4;Slc25a31	ADP/ATP translocase 2;ADP/ATP translocase 2, N-terminally processed;ADP/ATP translocase 1;ADP/ATP translocase 4;ADP/ATP translocase 4, N-terminally processed	yes	no	2	0.0026543	87.184			By matching
YGYEIPVDMLCK	EAANWKYKYGYEIPVD	IPVDMLCKRIADISQV	K	Y	G	C	K	R	0	0	0	1	1	0	1	1	0	1	1	1	1	0	1	0	0	0	2	1	0	0	12	0	1486.68	E0CXB1;Q9QUM9	E0CXB1	86	97	Psma6	Proteasome subunit alpha type-6	yes	no	2	0.0034781	98.407			By matching
YITPDQLADLYK	KSPDDPSRYITPDQLA	DQLADLYKSFVQNYPV	R	Y	I	Y	K	S	1	0	0	2	0	1	0	0	0	1	2	1	0	0	1	0	1	0	2	0	0	0	12	0	1438.73	Q5FW97;P17182;Q6PHC1	Q5FW97	270	281	EG433182;Eno1	Alpha-enolase	yes	no	2	1.4526e-05	129.34		By matching		By MS/MS	By MS/MS
YKPESDELTAEK	TLEEEMTKYKPESDEL	SDELTAEKITEFCHRF	K	Y	K	E	K	I	1	0	0	1	0	0	3	0	0	0	1	2	0	0	1	1	1	0	1	0	0	0	12	1	1408.67	Q3UDR2;Q3URP6;Q3U738;Q3TWE3;Q3TIM0;Q3THC3;Q3TF72;P09103;Q3TGS0;Q3UBY9;Q3UJA8;Q3UA23;Q3TT76	Q3UDR2	329	340	P4hb	Protein disulfide-isomerase	yes	no	2;3	7.8081e-10	158.01		By MS/MS	By MS/MS		By MS/MS
YLAEVAAGDDKK	KMKGDYYRYLAEVAAG	VAAGDDKKGIVDQSQQ	R	Y	L	K	K	G	3	0	0	2	0	0	1	1	0	0	1	2	0	0	0	0	0	0	1	1	0	0	12	1	1278.65	P63101	P63101	128	139	Ywhaz	14-3-3 protein zeta/delta	yes	yes	2;3	8.258e-05	123.95		By MS/MS		By MS/MS	By MS/MS
YQYNTNVVFDSK	PHCPPDGRYQYNTNVV	TNVVFDSKGRLTARYH	R	Y	Q	S	K	G	0	0	2	1	0	1	0	0	0	0	0	1	0	1	0	1	1	0	2	2	0	0	12	0	1476.69	Q2T9H5;Q9QZ25	Q2T9H5	159	170	Vnn3	Vascular non-inflammatory molecule 3	yes	no	2	1.7646e-06	142.97	By MS/MS	By MS/MS	By MS/MS	By MS/MS	By MS/MS
YTDDWFNSHGTR	NDPYPYPRYTDDWFNS	WFNSHGTRCAGEVSAA	R	Y	T	T	R	C	0	1	1	2	0	0	0	1	1	0	0	0	0	1	0	1	2	1	1	0	0	0	12	0	1497.63	Q3UZV3;Q547J8;Q3TYM6;Q3TT48;P21661	Q3UZV3	181	192	Pcsk2	Neuroendocrine convertase 2	yes	no	3	5.676e-05	114.24			By MS/MS		By matching
YVNWIQQTIAAN	GVYTKVCKYVNWIQQT	IQQTIAAN________	K	Y	V	A	N	-	2	0	2	0	0	2	0	0	0	2	0	0	0	0	0	0	1	1	1	1	0	0	12	0	1419.71	Q9D7Y7;Q9CPN9	Q9D7Y7	236	247	2210010C04Rik		yes	no	2	1.5087e-07	147.74	By MS/MS	By matching	By MS/MS		By MS/MS
YVPNSGQEDADR	NCKKDNCKYVPNSGQE	SGQEDADRDGIGDACD	K	Y	V	D	R	D	1	1	1	2	0	1	1	1	0	0	0	0	0	0	1	1	0	0	1	1	0	0	12	0	1349.58	B2RTL6;Q9Z1T2	B2RTL6	491	502	Thbs4	Thrombospondin-4	yes	no	2	0.001281	96.334					By MS/MS
YYVTIIDAPGHR	LWKFETSKYYVTIIDA	IIDAPGHRDFIKNMIT	K	Y	Y	H	R	D	1	1	0	1	0	0	0	1	1	2	0	0	0	0	1	0	1	0	2	1	0	0	12	0	1403.72	Q58E64;Q3UA81;P10126;Q3TII3;Q3UZQ3;D3YZ68;D3Z3I8	Q58E64	85	96	Eef1a1	Elongation factor 1-alpha;Elongation factor 1-alpha 1	yes	no	2;3	7.686e-06	131.54	By MS/MS		By MS/MS		By matching
AAGTLYTYPENWR	________________	YTYPENWRAFKALIAA	M	A	A	W	R	A	2	1	1	0	0	0	1	1	0	0	1	0	0	0	1	0	2	1	2	0	0	0	13	0	1540.73	Q4FZK2;Q9D8N0	Q4FZK2	2	14	Eef1g	Elongation factor 1-gamma	yes	no	2	1.1659e-05	116.24			By matching		By matching
ADQLTEEQIAEFK	________________	EEQIAEFKEAFSLFDK	M	A	D	F	K	E	2	0	0	1	0	2	3	0	0	1	1	1	0	1	0	0	1	0	0	0	0	0	13	0	1520.74	P62204;Q9D6P8	P62204	2	14	Calm1;Calml3	Calmodulin;Calmodulin-like protein 3	yes	no	2	1.3371e-10	177.36			By MS/MS		By MS/MS
AHSSMVGVNLPQK	DAFGTAHRAHSSMVGV	VGVNLPQKAGGFLMKK	R	A	H	Q	K	A	1	0	1	0	0	1	0	1	1	0	1	1	1	0	1	2	0	0	0	2	0	0	13	0	1366.7	P09411;S4R2M7	P09411	172	184	Pgk1	Phosphoglycerate kinase 1;Phosphoglycerate kinase	yes	no	3	0.048919	41.684
ALGQNPTNAEVLK	SQCGDVMRALGQNPTN	PTNAEVLKVLGNPKSD	R	A	L	L	K	V	2	0	2	0	0	1	1	1	0	0	2	1	0	0	1	0	1	0	0	1	0	0	13	0	1353.73	Q642K0;Q60605-2;Q60605;Q3TIG9;Q8CI43	Q642K0	38	50	Myl6;Myl6b	Myosin light polypeptide 6;Myosin light chain 6B	yes	no	2	0.0035005	82.705			By matching
ALLLQGSNEIELR	QQTGNLKKALLLQGSN	GSNEIELRGEGNSRFT	K	A	L	L	R	G	1	1	1	0	0	1	2	1	0	1	4	0	0	0	0	1	0	0	0	0	0	0	13	0	1454.81	Q99LL6;P11087-2;P11087;Q60785	Q99LL6	512	524	Col1a1	Collagen alpha-1(I) chain	yes	no	2	4.8451e-10	174.05	By MS/MS	By MS/MS	By matching	By matching	By matching
ALSLEGQQLIENR	SVAVDKARALSLEGQQ	GQQLIENRHYAVDSIH	R	A	L	N	R	H	1	1	1	0	0	2	2	1	0	1	3	0	0	0	0	1	0	0	0	0	0	0	13	0	1469.78	G3UYM8;Q80U26;F6VR53;D3YUF3;D3YUF4;G3UXP9;E9Q863;Q003U3;E9PY13;E9PY12;Q3UHQ9;G3UX72;E9PXE1;E9QPM7;Q6PDM6;E9PXE2;Q64096;Q8C7Z1	G3UYM8	289	301	Mcf2l	Guanine nucleotide exchange factor DBS	yes	no	2;3	3.1637e-05	110.08		By MS/MS	By matching	By MS/MS	By MS/MS
APLAEEWDYMTMK	IPSDAPWKAPLAEEWD	EWDYMTMKELLDKICW	K	A	P	M	K	E	2	0	0	1	0	0	2	0	0	0	1	1	2	0	1	0	1	1	1	0	0	0	13	0	1583.7	Q8BW75;E9Q3X6	Q8BW75	137	149	Maob	Amine oxidase [flavin-containing] B	yes	no	2	0.0011741	91.62
ASASYHISNLLEK	________________	HISNLLEKMTSSDKDF	M	A	S	E	K	M	2	0	1	0	0	0	1	0	1	1	2	1	0	0	0	3	0	0	1	0	0	0	13	0	1431.74	Q6ZQ38;Q3UMI9	Q6ZQ38	2	14	Cand1	Cullin-associated NEDD8-dissociated protein 1	yes	no	2	1.8755e-06	104.09
ATYLEFIQQNEER	________________	FIQQNEERDGVRFSWN	M	A	T	E	R	D	1	1	1	0	0	2	3	0	0	1	1	0	0	1	0	0	1	0	1	0	0	0	13	0	1639.78	Q3UKB4;Q3TYS4;Q3TAW4;Q9D662;A2AN97;A2AN98;A2AN99;A2ANA0;Q3U2Q0;Q3TIS3	Q3UKB4	2	14	Sec23b	Protein transport protein Sec23B	yes	no	2	0.00042883	80.96			By matching		By matching
AVAALLTIPEAEK	ELKRSAMRAVAALLTI	LTIPEAEKSPLMSEFQ	R	A	V	E	K	S	4	0	0	0	0	0	2	0	0	1	2	1	0	0	1	0	1	0	0	1	0	0	13	0	1324.76	Q6ZQ38	Q6ZQ38	1179	1191	Cand1	Cullin-associated NEDD8-dissociated protein 1	yes	yes	2	0.0083148	76.073
CQLEINFNTLQTK	KPPKVQEKCQLEINFN	NFNTLQTKLRLSNRPA	K	C	Q	T	K	L	0	0	2	0	1	2	1	0	0	1	2	1	0	1	0	0	2	0	0	0	0	0	13	0	1607.8	Q1A602;Q3ULT2;Q3UDJ7;P57780;A1BN54;Q7TPR4;E9Q2W9;O88990;Q8K3Q4;Q5FW75;Q9JI91	Q1A602	351	363	Actn4;Actn1;Actn3;Actn2	Alpha-actinin-4;Alpha-actinin-1;Alpha-actinin-3;Alpha-actinin-2	yes	no	2	9.4504e-08	134.61			By matching
DDNCDAQYSFVCK	NTGYKKWKDDNCDAQY	AQYSFVCKFKG_____	K	D	D	C	K	F	1	0	1	3	2	1	0	0	0	0	0	1	0	1	0	1	0	0	1	1	0	0	13	0	1620.62	Q8C6F9;Q3TV26;P43137	Q8C6F9	111	123	Reg1	Lithostathine-1	yes	no	2	2.1662e-22	215.02	By MS/MS		By MS/MS
DEILPTTPISEQK	HVSIVEPKDEILPTTP	TTPISEQKGGKPEPPA	K	D	E	Q	K	G	0	0	0	1	0	1	2	0	0	2	1	1	0	0	2	1	2	0	0	0	0	0	13	0	1469.76	Q9D0A2;Q9CZP6;Q5YLW3;Q3UK56;Q3UCL7;P62908	Q9D0A2	215	227	Rps3	40S ribosomal protein S3	yes	no	2	0.0083068	73.927			By matching
DENCEAQYSFVCK	NTAYKKWKDENCEAQY	AQYSFVCKFRA_____	K	D	E	C	K	F	1	0	1	1	2	1	2	0	0	0	0	1	0	1	0	1	0	0	1	1	0	0	13	0	1648.65	Q545J0;Q08731	Q545J0	158	170	Reg2	Lithostathine-2	yes	no	2	0.0044561	80.96			By MS/MS
DFINQQADAYVEK	DYDLSKMRDFINQQAD	QADAYVEKGILDKEEA	R	D	F	E	K	G	2	0	1	2	0	2	1	0	0	1	0	1	0	1	0	0	0	0	1	1	0	0	13	0	1539.72	P47867;P47867-2	P47867	441	453	Scg3	Secretogranin-3	yes	no	2	2.7417e-09	162.72	By MS/MS		By MS/MS		By MS/MS
DGQAMLWDLNEGK	SLCASGGKDGQAMLWD	LWDLNEGKHLYTLDGG	K	D	G	G	K	H	1	0	1	2	0	1	1	2	0	0	2	1	1	0	0	0	0	1	0	0	0	0	13	0	1475.67	P68040	P68040	213	225	Gnb2l1	Guanine nucleotide-binding protein subunit beta-2-like 1;Guanine nucleotide-binding protein subunit beta-2-like 1, N-terminally processed	yes	yes	2	5.6982e-05	112.42
DLDVAVLVGSMPR	DKEEIAFKDLDVAVLV	VLVGSMPRREGMERKD	K	D	L	P	R	R	1	1	0	2	0	0	0	1	0	0	2	0	1	0	1	1	0	0	0	3	0	0	13	0	1370.72	P14152;B1ATQ3	P14152	80	92	Mdh1	Malate dehydrogenase, cytoplasmic	yes	no	2	1.4411e-08	148.89			By matching		By MS/MS
DLLTAYYDVDYEK	NKDLIQGKDLLTAYYD	YYDVDYEKNAKGSNYW	K	D	L	E	K	N	1	0	0	3	0	0	1	0	0	0	2	1	0	0	0	0	1	0	3	1	0	0	13	0	1606.74	P27773	P27773	259	271	Pdia3	Protein disulfide-isomerase A3	yes	yes	2	0.0099706	70.889
DLVDDLKSELTGK	EFKTLFGRDLVDDLKS	LKSELTGKFEKLIVAM	R	D	L	G	K	F	0	0	0	3	0	0	1	1	0	0	3	2	0	0	0	1	1	0	0	1	0	0	13	1	1431.75	P48036	P48036	62	74	Anxa5	Annexin A5	yes	yes	2	2.1878e-08	150.22					By MS/MS
DNPGVVTCLDEAR	AMVSMVTKDNPGVVTC	VTCLDEARHGFETGDF	K	D	N	A	R	H	1	1	1	2	1	0	1	1	0	0	1	0	0	0	1	0	1	0	0	2	0	0	13	0	1444.66	B9EHN0;Q02053	B9EHN0	227	239	Uba1	Ubiquitin-like modifier-activating enzyme 1	yes	no	2	0.043879	57.288
DQGTYEDYVEGLR	LQTVAKNKDQGTYEDY	EDYVEGLRVFDKEGNG	K	D	Q	L	R	V	0	1	0	2	0	1	2	2	0	0	1	0	0	0	0	0	1	0	2	1	0	0	13	0	1543.68	Q642K0;Q60605-2;Q60605	Q642K0	82	94	Myl6	Myosin light polypeptide 6	yes	no	2	0.010253	70.373
DTNGSQFFITTVK	VSMANAGKDTNGSQFF	QFFITTVKTSWLDGKH	K	D	T	V	K	T	0	0	1	1	0	1	0	1	0	1	0	1	0	2	0	1	3	0	0	1	0	0	13	0	1456.72	Q9DCY1;P24369	Q9DCY1	146	158	Ppib	Peptidyl-prolyl cis-trans isomerase;Peptidyl-prolyl cis-trans isomerase B	yes	no	2	8.7805e-05	108.97			By MS/MS
EAFQEALAAAGDK	MVKLIESKEAFQEALA	ALAAAGDKLVVVDFSA	K	E	A	D	K	L	5	0	0	1	0	1	2	1	0	0	1	1	0	1	0	0	0	0	0	0	0	0	13	0	1319.64	P10639	P10639	9	21	Txn	Thioredoxin	yes	yes	2	0.0010416	92.939			By matching		By matching
EDSVKPGAHLTVK	EPKRAVSREDSVKPGA	PGAHLTVKKIFVGGIK	R	E	D	V	K	K	1	0	0	1	0	0	1	1	1	0	1	2	0	0	1	1	1	0	0	2	0	0	13	1	1379.74	E9Q7H5;Q6PFA7;B2RXM2;Q0VG47;J3QNY1;Q8BG05-2;Q6P6I7;A2AL12;Q5FB19;Q3UZG3;Q8BG05;Q5U3M2;V9GX38	E9Q7H5	92	104	Gm8991;Hnrnpa3;Gm6793;Gm9242;Gm17190	Heterogeneous nuclear ribonucleoprotein A3	yes	no	3	0.005712	69.229
EEASDYLELDTIK	TTITLVLKEEASDYLE	YLELDTIKNLVRKYSQ	K	E	E	I	K	N	1	0	0	2	0	0	3	0	0	1	2	1	0	0	0	1	1	0	1	0	0	0	13	0	1524.72	Q91V38;Q3UAD6;P08113;Q3UBU0;Q3TUD6;Q8CCY5;Q8C2R2	Q91V38	253	265	Hsp90b1	Endoplasmin	yes	no	2	3.0919e-05	115.34	By matching		By MS/MS
EGIPALDNFLDKL	TRKRKGLKEGIPALDN	LDNFLDKL________	K	E	G	K	L	-	1	0	1	2	0	0	1	1	0	1	3	1	0	1	1	0	0	0	0	0	0	0	13	1	1443.76	Q8C153;Q3UZ14;Q3UMI7;Q3UDC8;Q3TX47;Q3TWX1;Q3TLB1;Q3TJZ1;P58252;Q6P9L9;Q8BMA8;Q3TW58;Q3UBL9;Q3TK17;Q3TSK4;Q3TPG2;Q99LT6;Q61509	Q8C153	846	858	Eef2	Elongation factor 2	yes	no	2	0.0020755	96.23		By matching		By matching	By MS/MS
EIADGLCLEVEGK	FSDIYKIREIADGLCL	LCLEVEGKMVSRTEGA	R	E	I	G	K	M	1	0	0	1	1	0	3	2	0	1	2	1	0	0	0	0	0	0	0	1	0	0	13	0	1431.69	P63028	P63028	22	34	Tpt1	Translationally-controlled tumor protein	yes	yes	2	7.0376e-05	110.92			By MS/MS
ELTLQAMADGVNK	GKTVDGPRELTLQAMA	AMADGVNKGRGGKGSI	R	E	L	N	K	G	2	0	1	1	0	1	1	1	0	0	2	1	1	0	0	0	1	0	0	1	0	0	13	0	1388.7	Q3UZV3;Q547J8;Q3TYM6;Q3TT48;P21661	Q3UZV3	264	276	Pcsk2	Neuroendocrine convertase 2	yes	no	2	6.4741e-10	171.62	By MS/MS		By MS/MS	By MS/MS	By MS/MS
ENGEESHLAESSR	VSVPLQLKENGEESHL	SHLAESSRDALSEDEW	K	E	N	S	R	D	1	1	1	0	0	0	4	1	1	0	1	0	0	0	0	3	0	0	0	0	0	0	13	0	1443.62	Q03517;Q4W8U9	Q03517	92	104	Scg2	Secretogranin-2;Secretoneurin;Manserin	yes	no	2;3	7.6316e-06	121.45	By MS/MS		By MS/MS
ENYAELLDDGFLK	RPGISLVKENYAELLD	LLDDGFLKNITAQICI	K	E	N	L	K	N	1	0	1	2	0	0	2	1	0	0	3	1	0	1	0	0	0	0	1	0	0	0	13	0	1525.73	Q04857;B0LAD9;Q99LW4	Q04857	788	800	Col6a1	Collagen alpha-1(VI) chain	yes	no	2	8.157e-06	125.84	By MS/MS		By matching		By MS/MS
EQWSNCPTIGQIR	LPETFDAREQWSNCPT	CPTIGQIRDQGSCGSC	R	E	Q	I	R	D	0	1	1	0	1	2	1	1	0	2	0	0	0	0	1	1	1	1	0	0	0	0	13	0	1587.75	Q3TVS6;Q3TC17;P10605	Q3TVS6	88	100	Ctsb	Cathepsin B;Cathepsin B light chain;Cathepsin B heavy chain	yes	no	2	3.0056e-09	162.31			By MS/MS
EVCSEQAETGPCR	ESVEEVVREVCSEQAE	QAETGPCRAMISRWYF	R	E	V	C	R	A	1	1	0	0	2	1	3	1	0	0	0	0	0	0	1	1	1	0	0	1	0	0	13	0	1521.62	Q3TVS1;Q3TXI9;Q3TWF3;Q53ZT3;P12023-3;P12023	Q3TVS1	289	301	App	Amyloid beta A4 protein;N-APP;Soluble APP-alpha;Soluble APP-beta;C99;Beta-amyloid protein 42;Beta-amyloid protein 40;C83;P3(42);P3(40);C80;Gamma-secretase C-terminal fragment 59;Gamma-secretase C-terminal fragment 57;Gamma-secretase C-terminal fragment 50;C31	yes	no	2	0.0032274	83.204			By MS/MS
EWVTQASGVWFAK	IDTGIHSREWVTQASG	ASGVWFAKKITKDYGQ	R	E	W	A	K	K	2	0	0	0	0	1	1	1	0	0	0	1	0	1	0	1	1	2	0	2	0	0	13	0	1507.75	Q7TPZ8	Q7TPZ8	182	194	Cpa1	Carboxypeptidase A1	yes	yes	2	4.9689e-05	113.24			By MS/MS
EYDDNGEGITIFR	TNIESLVKEYDDNGEG	GEGITIFRPLHLANKF	K	E	Y	F	R	P	0	1	1	2	0	0	2	2	0	2	0	0	0	1	0	0	1	0	1	0	0	0	13	0	1527.68	P27773	P27773	195	207	Pdia3	Protein disulfide-isomerase A3	yes	yes	2	9.48e-08	134.56			By MS/MS
EYLPIGGLAEFCK	IAAKNLDKEYLPIGGL	GGLAEFCKASAELALG	K	E	Y	C	K	A	1	0	0	0	1	0	2	2	0	1	2	1	0	1	1	0	0	0	1	0	0	0	13	0	1495.74	P05202	P05202	95	107	Got2	Aspartate aminotransferase, mitochondrial	yes	yes	2	0.0094284	71.879
FASEITPITISVK	KEAWDAGKFASEITPI	TPITISVKGKPDVVVK	K	F	A	V	K	G	1	0	0	0	0	0	1	0	0	3	0	1	0	1	1	2	2	0	0	1	0	0	13	0	1404.79	Q3TQP7;Q8QZT1	Q3TQP7	228	240	Acat1	Acetyl-CoA acetyltransferase, mitochondrial	yes	no	2	0.0011812	73.927			By matching
FCTGLTQIETLFK	NMKEVFTRFCTGLTQI	TQIETLFKSKNYEFMW	R	F	C	F	K	S	0	0	0	0	1	1	1	1	0	1	2	1	0	2	0	0	3	0	0	0	0	0	13	0	1556.79	Q04447	Q04447	253	265	Ckb	Creatine kinase B-type	yes	yes	2	9.8145e-06	117.93					By MS/MS
FHADMLKNEAPEK	NLSKHMKKFHADMLKN	LKNEAPEKKESGRQSS	K	F	H	E	K	K	2	0	1	1	0	0	2	0	1	0	1	2	1	1	1	0	0	0	0	0	0	0	13	1	1528.73	Q99KE8-3;A2AQR4	Q99KE8-3	391	403	Zfp64		yes	no	2	7.0656e-05	108.72		By MS/MS	By matching	By MS/MS
FHCVGGSVQNPEK	DWKTVPERFHCVGGSV	GSVQNPEKIPPTGKLV	R	F	H	E	K	I	0	0	1	0	1	1	1	2	1	0	0	1	0	1	1	1	0	0	0	2	0	0	13	0	1457.67	Q3UZV3;Q547J8;Q3TYM6;Q3TT48;P21661	Q3UZV3	447	459	Pcsk2	Neuroendocrine convertase 2	yes	no	2	2.9162e-25	240.92	By MS/MS			By MS/MS	By MS/MS
FNTFIHEDIWNIR	MTSVQCKRFNTFIHED	HEDIWNIRGICSTTNI	R	F	N	I	R	G	0	1	2	1	0	0	1	0	1	3	0	0	0	2	0	0	1	1	0	0	0	0	13	0	1703.84	Q5UCA9;Q8C7E4;Q8C663;Q6NXX2;Q9JJH1	Q5UCA9	70	82	Rnase4	Ribonuclease 4	yes	no	3	3.103e-08	137.84				By matching	By MS/MS
GDASKEDIDTAMK	EAVRLHERGDASKEDI	EDIDTAMKLGAGYPMG	R	G	D	M	K	L	2	0	0	3	0	0	1	1	0	1	0	2	1	0	0	1	1	0	0	0	0	0	13	1	1379.62	Q61425	Q61425	237	249	Hadh	Hydroxyacyl-coenzyme A dehydrogenase, mitochondrial	yes	yes	3	1.7085e-06	127.71					By MS/MS
GDHVWDGNSFDSK	NNLVIFHRGDHVWDGN	DGNSFDSKFVYQQRGL	R	G	D	S	K	F	0	0	1	3	0	0	0	2	1	0	0	1	0	1	0	2	0	1	0	1	0	0	13	0	1462.61	E9Q704;F8VQA4;P97467;Q3V1A8	E9Q704	428	440	Pam	Peptidyl-glycine alpha-amidating monooxygenase;Peptidylglycine alpha-hydroxylating monooxygenase;Peptidyl-alpha-hydroxyglycine alpha-amidating lyase	yes	no	3	0.023037	53.051			By MS/MS
GNPTVEVDLYTAK	AREIFDSRGNPTVEVD	EVDLYTAKGLFRAAVP	R	G	N	A	K	G	1	0	1	1	0	0	1	1	0	0	1	1	0	0	1	0	2	0	1	2	0	0	13	0	1405.71	D3Z6E4;Q922A0;Q545V3;Q3UJ20;P17183;D3YVD3;D3Z2S4;A0A0N4SUX5;A0A0N4SUI6;B1ARR6;A0A0N4SUW8;Q5FW97;P17182;Q8CF78;B0QZL1;B1ARR7	Q5FW97	16	28	Eno2;Eno1;EG433182	Enolase;Gamma-enolase;Alpha-enolase	no	no	2	0.00086597	94.688			By MS/MS
GSFSEQGINEFLR	KMKFALLKGSFSEQGI	QGINEFLRELSFGRGS	K	G	S	L	R	E	0	1	1	0	0	1	2	2	0	1	1	0	0	2	0	2	0	0	0	0	0	0	13	0	1482.71	Q3THH1;Q922R8;Q3TML0;Q3TJL8;Q9DAB4	Q3THH1	379	391	Pdia6	Protein disulfide-isomerase A6	yes	no	2	8.2968e-13	190.1					By MS/MS
GTFASLSELHCDK	LNHLDSLKGTFASLSE	LSELHCDKLHVDPENF	K	G	T	D	K	L	1	0	0	1	1	0	1	1	1	0	2	1	0	1	0	2	1	0	0	0	0	0	13	0	1463.67	Q54AH9;Q549D9;A8DV59;A8DV41;P02089;Q9QUN8;D0U293;A8DUK0;P02088;A8DUL5;A8DUP7;A8DUM2;A8DUP3;A8DUK2;B1Q450;A8DUK7;A8DUK4;E9Q223;A8DUP0;A8DUL2;A8DUL0;A8DUQ5	A8DUK0	84	96	Hbb-b2;Hbbt2;Hbbt1;Hbb-b1;HBB1;Hbb-bs	Hemoglobin subunit beta-2;Hemoglobin subunit beta-1	no	no	2;3	0.00013241	103.97			By MS/MS		By MS/MS
GTIEILSDVQLIK	GITTKISRGTIEILSD	LSDVQLIKTGDKVGAS	R	G	T	I	K	T	0	0	0	1	0	1	1	1	0	3	2	1	0	0	0	1	1	0	0	1	0	0	13	0	1427.82	Q5M8R8;Q5FWB6;P14869;S4R1N1	Q5M8R8	150	162	Rplp0	60S acidic ribosomal protein P0	yes	no	2	0.00086597	94.688					By matching
GVQVETISPGDGR	________________	TISPGDGRTFPKRGQT	M	G	V	G	R	T	0	1	0	1	0	1	1	3	0	1	0	0	0	0	1	1	1	0	0	2	0	0	13	0	1313.66	Q1JUQ7;Q1JUQ8;Q1JUQ6;Q3ULN5;P26883	Q1JUQ7	2	14	Fkbp1a	Peptidyl-prolyl cis-trans isomerase;Peptidyl-prolyl cis-trans isomerase FKBP1A	yes	no	2	0.00017844	101.53			By matching
GYCVSLTSNTAYK	GAPSTANRGYCVSLTS	LTSNTAYKKWKDENCE	R	G	Y	Y	K	K	1	0	1	0	1	0	0	1	0	0	1	1	0	0	0	2	2	0	2	1	0	0	13	0	1462.68	Q545J0;Q08731	Q545J0	142	154	Reg2	Lithostathine-2	yes	no	2	0.0071319	76.073			By matching
GYCVSLTSNTGYK	GSPNSSNRGYCVSLTS	LTSNTGYKKWKDDNCD	R	G	Y	Y	K	K	0	0	1	0	1	0	0	2	0	0	1	1	0	0	0	2	2	0	2	1	0	0	13	0	1448.66	Q8C6F9;Q3TV26;P43137	Q8C6F9	95	107	Reg1	Lithostathine-1	yes	no	2	6.9164e-09	156.14			By MS/MS
GYLGPEQLPDCLK	IETRANVKGYLGPEQL	EQLPDCLKGCDVVVIP	K	G	Y	L	K	G	0	0	0	1	1	1	1	2	0	0	3	1	0	0	2	0	0	0	1	0	0	0	13	0	1488.73	P08249;A0A0G2JF23	P08249	79	91	Mdh2	Malate dehydrogenase, mitochondrial	yes	no	2	4.4387e-08	143.55			By MS/MS
HEAGDMMGGHAIR	TYKSGVYKHEAGDMMG	MMGGHAIRILGWGVEN	K	H	E	I	R	I	2	1	0	1	0	0	1	3	2	1	0	0	2	0	0	0	0	0	0	0	0	0	13	0	1380.6	Q3TVS6;Q3TC17;P10605;Q6LAF6	Q3TVS6	269	281	Ctsb	Cathepsin B;Cathepsin B light chain;Cathepsin B heavy chain	yes	no	3	0.035489	45.825
HEQNIDCGGGYVK	LVVQFTVKHEQNIDCG	DCGGGYVKLFPSGLDQ	K	H	E	V	K	L	0	0	1	1	1	1	1	3	1	1	0	1	0	0	0	0	0	0	1	1	0	0	13	0	1475.65	B2MWM9;P14211;Q3UWP8	B2MWM9	99	111	Calr	Calreticulin	yes	no	2;3	8.3082e-27	244.71			By MS/MS		By MS/MS
HVFGESDELIGQK	VLGHSERRHVFGESDE	SDELIGQKVSHALAEG	R	H	V	Q	K	V	0	0	0	1	0	1	2	2	1	1	1	1	0	1	0	1	0	0	0	1	0	0	13	0	1457.72	P17751;H7BXC3	P17751	151	163	Tpi1	Triosephosphate isomerase	yes	no	2;3	3.8299e-13	189.13	By matching		By matching		By matching
IAQLEEQLDNETK	SIAALEAKIAQLEEQL	EQLDNETKERQAASKQ	K	I	A	T	K	E	1	0	1	1	0	2	3	0	0	1	2	1	0	0	0	0	1	0	0	0	0	0	13	0	1529.76	Q8VDD5;Q3UFT0;Q99JJ3;Q811J9;Q7TQJ6	Q8VDD5	1816	1828	Myh9	Myosin-9	yes	no	2	0.047989	55.724			By MS/MS
IDSLSAQLSQLQK	ELQQSRIRIDSLSAQL	AQLSQLQKQLAAKEAK	R	I	D	Q	K	Q	1	0	0	1	0	3	0	0	0	1	3	1	0	0	0	3	0	0	0	0	0	0	13	0	1429.78	P48678-3;P48678-2;P48678	P48678-3	187	199	Lmna	Prelamin-A/C;Lamin-A/C	yes	no	2	0.0011741	91.62			By MS/MS
IETQTQEEVRDSK	DWSPIEEKIETQTQEE	QEEVRDSKENTEKNEQ	K	I	E	S	K	E	0	1	0	1	0	2	3	0	0	1	0	1	0	0	0	1	2	0	0	1	0	0	13	1	1561.76	Q03517;Q4W8U9	Q03517	259	271	Scg2	Secretogranin-2;Secretoneurin;Manserin	yes	no	2	0.00022755	113.88			By MS/MS
IIYGGSVTGATCK	DGVAQSTRIIYGGSVT	SVTGATCKELASQPDV	R	I	I	C	K	E	1	0	0	0	1	0	0	3	0	2	0	1	0	0	0	1	2	0	1	1	0	0	13	0	1325.66	P17751;H7BXC3	P17751	257	269	Tpi1	Triosephosphate isomerase	yes	no	2	8.9123e-06	119.39			By MS/MS
ILDSVGIEADDDR	PSAKDIKKILDSVGIE	GIEADDDRLNKVISEL	K	I	L	D	R	L	1	1	0	4	0	0	1	1	0	2	1	0	0	0	0	1	0	0	0	1	0	0	13	0	1416.67	P99027	P99027	26	38	Rplp2	60S acidic ribosomal protein P2	yes	yes	2	3.2864e-08	145.6			By MS/MS
ILTFDQLALESPK	RILKAGGKILTFDQLA	QLALESPKGRGTVLLS	K	I	L	P	K	G	1	0	0	1	0	1	1	0	0	1	3	1	0	1	1	1	1	0	0	0	0	0	13	0	1473.81	Q0QEW9;Q642K1;Q58EW0;P35980;G3UZK4	Q0QEW9	97	109	Rpl18	60S ribosomal protein L18	yes	no	2	0.00047374	98.592	By matching		By MS/MS
ITVVDALHEIPLK	GQASAAAKITVVDALH	ALHEIPLKKGEGAQL_	K	I	T	L	K	K	1	0	0	1	0	0	1	0	1	2	2	1	0	0	1	0	1	0	0	2	0	0	13	0	1446.84	Q3U131;Q811C8;A0A5E1;Q3UFA6;F8WH23;Q61581;E9Q5D9	Q3U131	234	246	Igfbp7	Insulin-like growth factor-binding protein 7	yes	no	3	0.00078774	85.554			By MS/MS
IVAATLSDPELFK	NPPAQGARIVAATLSD	LSDPELFKEWKGNVKT	R	I	V	F	K	E	2	0	0	1	0	0	1	0	0	1	2	1	0	1	1	1	1	0	0	1	0	0	13	0	1402.77	P05201	P05201	306	318	Got1	Aspartate aminotransferase, cytoplasmic	yes	yes	2	0.00017844	101.53			By matching
IYVDDGLISLQVK	KVVEVGSKIYVDDGLI	GLISLQVKEKGADFLV	K	I	Y	V	K	E	0	0	0	2	0	1	0	1	0	2	2	1	0	0	0	1	0	0	1	2	0	0	13	0	1461.81	P52480;P52480-2	P52480	174	186	Pkm	Pyruvate kinase PKM	no	no	2	0.00043862	98.942			By MS/MS		By matching
KEEEKEELMEWWK	ELESFSERKEEEKEEL	EELMEWWKMMSETLNF	R	K	E	W	K	M	0	0	0	0	0	0	6	0	0	0	1	3	1	0	0	0	0	2	0	0	0	0	13	2	1792.83	Q543R4;Q00493	Q543R4	456	468	Cpe	Carboxypeptidase E	yes	no	3	2.2715e-17	203.11					By MS/MS
KPASFMTSICDER	ARELGLIRKPASFMTS	MTSICDERGQELIYAG	R	K	P	E	R	G	1	1	0	1	1	0	1	0	0	1	0	1	1	1	1	2	1	0	0	0	0	0	13	1	1540.7	Q3TED3;Q3V117;Q91V92;Q3UEA1;Q8VDM8;Q3UVY4	Q3TED3	826	838	Acly	ATP-citrate synthase	yes	no	2;3	3.2314e-08	149.59
KPVTEAQSCHLAR	LLCLDGTRKPVTEAQS	AQSCHLARVPNRAVFS	R	K	P	A	R	V	2	1	0	0	1	1	1	0	1	0	1	1	0	0	1	1	1	0	0	1	0	0	13	1	1495.76	F6W4D3;D3YY36;Q8VC96;Q9DBD0	F6W4D3	159	171	1300017J02Rik;Ica	Inhibitor of carbonic anhydrase	yes	no	2;3;4	1.3928e-15	204.01	By MS/MS	By MS/MS	By MS/MS	By MS/MS	By MS/MS
LDPGSEETQTLVR	YESYTWRKLDPGSEET	EETQTLVREYFSWEGT	K	L	D	V	R	E	0	1	0	1	0	1	2	1	0	0	2	0	0	0	1	1	2	0	0	1	0	0	13	0	1443.72	Q4FZK2;Q9D8N0;Q8R1N8	Q4FZK2	402	414	Eef1g	Elongation factor 1-gamma	yes	no	2	0.008874	72.891			By MS/MS
LDQLIYIPLPDEK	PAILRPGRLDQLIYIP	YIPLPDEKSRVAILKA	R	L	D	E	K	S	0	0	0	2	0	1	1	0	0	2	3	1	0	0	2	0	0	0	1	0	0	0	13	0	1555.85	Q01853;Q8BNF8	Q01853	639	651	Vcp	Transitional endoplasmic reticulum ATPase	yes	no	2	4.7121e-05	113.53			By matching		By MS/MS
LEAGDHPVELLAR	KIHENEKRLEAGDHPV	HPVELLARDFEKNYNM	R	L	E	A	R	D	2	1	0	1	0	0	2	1	1	0	3	0	0	0	1	0	0	0	0	1	0	0	13	0	1418.75	Q5NCU4;Q5NCU5;Q3TXI6;P07214	Q5NCU4	204	216	Sparc	SPARC	yes	no	3	4.632e-09	117.27		By MS/MS		By matching
LGVRPSQGGEAPR	PAPRIGFKLGVRPSQG	SQGGEAPREVTSDSGS	K	L	G	P	R	E	1	2	0	0	0	1	1	3	0	0	1	0	0	0	2	1	0	0	0	1	0	0	13	1	1322.71	B7ZNJ1;Q3UH17;A0A087WS56;B9EHT6;A0A087WSN6;Q3UHL6;Q3UGY5;A0A087WR50;P11276;Q3TBB4;Q3TCF1;Q3TCL7;Q3UHR1	B7ZNJ1	1116	1128	Fn1	Fibronectin;Anastellin	yes	no	3	4.31e-05	108.23
LPENYEELNALVK	YPYSYDYKLPENYEEL	EELNALVKGAAKELST	K	L	P	V	K	G	1	0	2	0	0	0	3	0	0	0	3	1	0	0	1	0	0	0	1	1	0	0	13	0	1530.79	B2RS76	B2RS76	318	330	Cpb1		yes	yes	2;3	7.6857e-25	234.52	By MS/MS	By MS/MS	By MS/MS	By matching	By matching
LPVDEEAFVIDFK	TYFCMSMRLPVDEEAF	EAFVIDFKPRASMDTV	R	L	P	F	K	P	1	0	0	2	0	0	2	0	0	1	1	1	0	2	1	0	0	0	0	2	0	0	13	0	1520.78	E9Q704;F8VQA4;P97467;Q8BQ31	E9Q704	85	97	Pam	Peptidyl-glycine alpha-amidating monooxygenase;Peptidylglycine alpha-hydroxylating monooxygenase;Peptidyl-alpha-hydroxyglycine alpha-amidating lyase	yes	no	2	0.0099706	70.889			By MS/MS
LQIWDTAGQESFR	TIDGKQIKLQIWDTAG	TAGQESFRSITRSYYR	K	L	Q	F	R	S	1	1	0	1	0	2	1	1	0	1	1	0	0	1	0	1	1	1	0	0	0	0	13	0	1549.75	Q0PD65;P53994;Q8BXY4;Q6PDZ3;Q3TEG7;Q9DB48;Q5U628;Q0PD64;P59279	Q0PD65	57	69	Rab2a;Rab2b	Ras-related protein Rab-2A;Ras-related protein Rab-2B	yes	no	2	0.0010499	92.856
LQQAALPIVSEAK	NALKTPDKLQQAALPI	LPIVSEAKCKESWGSK	K	L	Q	A	K	C	3	0	0	0	0	2	1	0	0	1	2	1	0	0	1	1	0	0	0	1	0	0	13	0	1366.78	Q9CR35	Q9CR35	173	185	Ctrb1	Chymotrypsinogen B;Chymotrypsin B chain A;Chymotrypsin B chain B;Chymotrypsin B chain C	yes	yes	2;3	9.6524e-05	107.99	By MS/MS	By MS/MS	By MS/MS
LQQEDGISFEYHR	AGMRRRRRLQQEDGIS	GISFEYHRYPELREAL	R	L	Q	H	R	Y	0	1	0	1	0	2	2	1	1	1	1	0	0	1	0	1	0	0	1	0	0	0	13	0	1620.75	Q543R4;Q00493	Q543R4	43	55	Cpe	Carboxypeptidase E	yes	no	2;3	5.2468e-13	186.17			By MS/MS		By MS/MS
LTASAPGYLAITK	LLAPGNYKLTASAPGY	PGYLAITKKVAVPFSP	K	L	T	T	K	K	3	0	0	0	0	0	0	1	0	1	2	1	0	0	1	1	2	0	1	0	0	0	13	0	1304.73	Q543R4;Q00493	Q543R4	421	433	Cpe	Carboxypeptidase E	yes	no	2	0.00072057	96.135	By MS/MS		By MS/MS		By MS/MS
LTFSCLGGSDNFK	NVNFEKSKLTFSCLGG	LGGSDNFKHLNEIDLF	K	L	T	F	K	H	0	0	1	1	1	0	0	2	0	0	2	1	0	2	0	2	1	0	0	0	0	0	13	0	1444.67	D3Z7C6;Q9CRH1;Q3TJG6;Q9R0Q7	D3Z7C6	36	48	Ptges3	Prostaglandin E synthase 3	yes	no	2	0.0012132	108.53
MASILPASNRSMR	________________	PASNRSMRPDKNTYER	-	M	A	M	R	P	2	2	1	0	0	0	0	0	0	1	1	0	2	0	1	3	0	0	0	0	0	0	13	1	1432.73	Q3UEN1;Q8R093;Q8CGR7	Q3UEN1	1	13	Upp2	Uridine phosphorylase;Uridine phosphorylase 2	yes	no	2	0.011186	72.29			By MS/MS
MFVLDEADEMLSR	YLSPKYIKMFVLDEAD	EADEMLSRGFKDQIYD	K	M	F	S	R	G	1	1	0	2	0	0	2	0	0	0	2	0	2	1	0	1	0	0	0	1	0	0	13	0	1554.71	Q3TLL6;Q4FZL1;Q5F2A7;Q3UXC2;Q3TGK7;Q3TFG3;P60843;Q3TSJ4;Q78WR5;Q3U8I0;Q8BTU6;Q52KC1;P10630;P10630-2;E9Q561	Q3TLL6	178	190	Eif4a1;Eif4a2	Eukaryotic initiation factor 4A-I;Eukaryotic initiation factor 4A-II;Eukaryotic initiation factor 4A-II, N-terminally processed	yes	no	2	2.0485e-05	116.51					By matching
MLGQMTDQVADLR	REILGTCKMLGQMTDQ	TDQVADLRARGQGASP	K	M	L	L	R	A	1	1	0	2	0	2	0	1	0	0	2	0	2	0	0	0	1	0	0	1	0	0	13	0	1476.71	Q64727	Q64727	327	339	Vcl	Vinculin	yes	yes	2	0.00011144	106.32				By matching	By MS/MS
MLQTSSVLVSGLR	VLGHEAMKMLQTSSVL	SVLVSGLRGLGVEIAK	K	M	L	L	R	G	0	1	0	0	0	1	0	1	0	0	3	0	1	0	0	3	1	0	0	2	0	0	13	0	1389.77	B9EHN0;Q02053	B9EHN0	69	81	Uba1	Ubiquitin-like modifier-activating enzyme 1	yes	no	2	0.028387	63.185
MTGSGIYAPDSPR	NLHNPSRRMTGSGIYA	IYAPDSPRVFHYDRKT	R	M	T	P	R	V	1	1	0	1	0	0	0	2	0	1	0	0	1	0	2	2	1	0	1	0	0	0	13	0	1350.62	Q3UEK0;Q9Z0K8	Q3UEK0	92	104	Vnn1	Pantetheinase	yes	no	2	7.2627e-29	210.64	By MS/MS	By matching	By MS/MS	By matching	By matching
MVVPLACLLTPLK	SSRLEATRMVVPLACL	ACLLTPLKERPDLPPV	R	M	V	L	K	E	1	0	0	0	1	0	0	0	0	0	4	1	1	0	2	0	1	0	0	2	0	0	13	0	1453.84	Q3UKB4;Q3TYS4;Q3TAW4;Q9D662;A2AN97;A2AN98;A2AN99;A2ANA0;Q3U2Q0;Q3TIS3	Q3UKB4	34	46	Sec23b	Protein transport protein Sec23B	yes	no	2	0.053272	53.869					By MS/MS
NALSKNLLKMLSK	GINRAYGKNALSKNLL	NLLKMLSKAVDALKSD	K	N	A	S	K	A	1	0	2	0	0	0	0	0	0	0	4	3	1	0	0	2	0	0	0	0	0	0	13	2	1458.86	Q3TEG5;E9Q6L3;A0A0R4J1L8;E9QMT1;F6R307;F6RT60;A0A0R4J023;Q9JLZ3-3;Q9JLZ3-2;Q9JLZ3	Q3TEG5	76	88	Auh	Methylglutaconyl-CoA hydratase, mitochondrial	yes	no	2	0.00019536	106.26
NFDAGWCEVGASR	CFGVDPNRNFDAGWCE	WCEVGASRSPCSDTYC	R	N	F	S	R	S	2	1	1	1	1	0	1	2	0	0	0	0	0	1	0	1	0	1	0	1	0	0	13	0	1467.62	B2RS76	B2RS76	251	263	Cpb1		yes	yes	2	0.0058569	78.401			By MS/MS
NLDEIIFTKNEMK	________________	ALEYDESAEDANPAGA	-	N	L	M	K	-	0	0	2	1	0	0	2	0	0	2	1	2	1	1	0	0	1	0	0	0	0	0	13	1	1593.81		REV__Q6A078					yes	no	2	0.018732	50.222		By MS/MS		By matching
NNVVAGYDIALLR	VSHPYWNKNNVVAGYD	GYDIALLRLAKSVTLN	K	N	N	L	R	L	2	1	2	1	0	0	0	1	0	1	2	0	0	0	0	0	0	0	1	2	0	0	13	0	1416.77	Q91X79	Q91X79	112	124	Cela1	Chymotrypsin-like elastase family member 1	yes	yes	2	9.2045e-05	108.5	By matching	By MS/MS	By MS/MS
NPLPVTLTNVVFR	CGVQIVFKNPLPVTLT	TLTNVVFRLEGSGLQR	K	N	P	F	R	L	0	1	2	0	0	0	0	0	0	0	2	0	0	1	2	0	2	0	0	3	0	0	13	0	1468.84	A0A0R4J293;Q9JLF6	A0A0R4J293	714	726	Tgm1	Protein-glutamine gamma-glutamyltransferase K	yes	no	2	0.0010499	92.856	By matching		By MS/MS
NWGEGWGLVPSDR	GEKMSYLKNWGEGWGL	WGLVPSDRALVFVDNH	K	N	W	D	R	A	0	1	1	1	0	0	1	3	0	0	1	0	0	0	1	1	0	2	0	1	0	0	13	0	1471.68	P00688;Q61299	P00688	291	303	Amy2	Pancreatic alpha-amylase	yes	no	2	4.7498e-13	193.11	By MS/MS	By MS/MS	By MS/MS		By MS/MS
NWGEGWGMVPSDR	GEKMSYLKNWGEGWGM	WGMVPSDRALVFVDNH	K	N	W	D	R	A	0	1	1	1	0	0	1	3	0	0	0	0	1	0	1	1	0	2	0	1	0	0	13	0	1489.64	Q8C5B4;Q61298	Q8C5B4	291	303		Alpha-amylase	yes	no	2	7.0597e-10	170.74	By MS/MS	By MS/MS	By MS/MS	By matching	By matching
PENILITKQSAIK	NCIHRDVKPENILITK	ITKQSAIKLCDFGFAR	K	P	E	I	K	L	1	0	1	0	0	1	1	0	0	3	1	2	0	0	1	1	1	0	0	0	0	0	13	1	1453.85	Q14BG3;Q8CEQ0	Q14BG3	129	141	Cdkl1	Cyclin-dependent kinase-like 1	yes	no	2	0.0038255	74.987	By MS/MS
QEEEEEEEERLSR	KGRELEHKQEEEEEEE	EEEERLSREWEDKRWS	K	Q	E	S	R	E	0	2	0	0	0	1	8	0	0	0	1	0	0	0	0	1	0	0	0	0	0	0	13	1	1690.73	P26339;Q3UN28	P26339	339	351	Chga	Chromogranin-A;Pancreastatin;Beta-granin;WE-14;Catestatin;GE-25;Serpinin-RRG;Serpinin;p-Glu serpinin precursor	yes	no	3	0.001329	93.424			By MS/MS
QEPSDSPMFIINR	MIAFKIIRQEPSDSPM	SPMFIINRKTGEIRTM	R	Q	E	N	R	K	0	1	1	1	0	1	1	0	0	2	0	0	1	1	2	2	0	0	0	0	0	0	13	0	1532.73	B2RQH0;Q61495;Q7TSF1	B2RQH0	201	213	Dsg1b;Dsg1a	Desmoglein-1-alpha;Desmoglein-1-beta	yes	no	2	0.00029457	100.38			By MS/MS
QEYDESGPSIVHR	FQQMWISKQEYDESGP	SGPSIVHRKCF_____	K	Q	E	H	R	K	0	1	0	1	0	1	2	1	1	1	0	0	0	0	1	2	0	0	1	1	0	0	13	0	1515.7	Q3UAF7;Q3UAF6;Q3U5R4;B2RRX1;P60710;Q3UAA9;Q3UA89;Q3U939;Q3U804;Q3UGS0;Q61276;Q3TIJ9;Q3UCF8;E9Q1F2;Q99NC5;F8WGM8;Q4KL81;P63260;Q3TSB7;B1ATY1;Q3UBP6;Q3UBQ4	Q3UAF7	360	372	Actb;Actg1	Actin, cytoplasmic 1;Actin, cytoplasmic 1, N-terminally processed;Actin, cytoplasmic 2;Actin, cytoplasmic 2, N-terminally processed	no	no	2;3	3.1838e-24	228.8	By MS/MS		By MS/MS		By MS/MS
QTEQTYWQATPFR	SFYVVMWKQTEQTYWQ	YWQATPFRAVAEPGIQ	K	Q	T	F	R	A	1	1	0	0	0	3	1	0	0	0	0	0	0	1	1	0	3	1	1	0	0	0	13	0	1654.77	B2RTL6;Q9Z1T2;E9PWF0;Q05895	B2RTL6	817	829	Thbs4;Thbs3	Thrombospondin-4;Thrombospondin-3	yes	no	2	2.8118e-26	240.59	By MS/MS			By MS/MS	By MS/MS
SAVTALTSLHGTK	EELDQLAKSAVTALTS	LTSLHGTKFKYGSIID	K	S	A	T	K	F	2	0	0	0	0	0	0	1	1	0	2	1	0	0	0	2	3	0	0	1	0	0	13	0	1284.7	Q7TPZ8	Q7TPZ8	335	347	Cpa1	Carboxypeptidase A1	yes	yes	2;3	9.9164e-10	166.48	By matching		By MS/MS
SELAVSSELDLLK	LIQALLPKSELAVSSE	SSELDLLKAVDQWSTE	K	S	E	L	K	A	1	0	0	1	0	0	2	0	0	0	4	1	0	0	0	3	0	0	0	1	0	0	13	0	1402.76	Q07797	Q07797	311	323	Lgals3bp	Galectin-3-binding protein	yes	yes	2	7.6431e-08	137.84			By MS/MS	By matching	By matching
SEPIPESNEGPVK	GNLKRYLKSEPIPESN	ESNEGPVKVVVAENFD	K	S	E	V	K	V	0	0	1	0	0	0	3	1	0	1	0	1	0	0	3	2	0	0	0	1	0	0	13	0	1381.67	P27773	P27773	367	379	Pdia3	Protein disulfide-isomerase A3	yes	yes	2	1.2732e-06	131.69			By MS/MS		By MS/MS
SESLSNCSIGKKR	________________	NCSIGKKRLEKSPSFA	R	S	E	K	R	L	0	1	1	0	1	0	1	1	0	1	1	2	0	0	0	4	0	0	0	0	0	0	13	2	1464.74	Q3TE53;Q3UHP6;P59672;P59672-2	Q3TE53	5	17	Anks1;Anks1a	Ankyrin repeat and SAM domain-containing protein 1A	yes	no	2	0.006729	68.676	By matching		By matching
SGDAAIVDMVPGK	EDGPKFLKSGDAAIVD	IVDMVPGKPMCVESFS	K	S	G	G	K	P	2	0	0	2	0	0	0	2	0	1	0	1	1	0	1	1	0	0	0	2	0	0	13	0	1258.62	Q58E64;Q3UA81;P10126;Q3TII3;Q3UZQ3;Q4FZE5	Q58E64	396	408	Eef1a1	Elongation factor 1-alpha;Elongation factor 1-alpha 1	yes	no	2	0.001658	86.803
SIQFVDWCPTGFK	IATIKTKRSIQFVDWC	DWCPTGFKVGINYQPP	R	S	I	F	K	V	0	0	0	1	1	1	0	1	0	1	0	1	0	2	1	1	1	1	0	1	0	0	13	0	1583.74	P05213;Q99KA2;A0A0A0MQA5;P68368	P05213	340	352	Tuba1b;Tuba4a	Tubulin alpha-1B chain;Tubulin alpha-4A chain	no	no	2	9.411e-08	134.68		By matching	By matching	By MS/MS	By MS/MS
SIVDFVTSHGNIK	PNSEVEVKSIVDFVTS	VTSHGNIKAFISIHSY	K	S	I	I	K	A	0	0	1	1	0	0	0	1	1	2	0	1	0	1	0	2	1	0	0	2	0	0	13	0	1415.74	Q7TPZ8	Q7TPZ8	288	300	Cpa1	Carboxypeptidase A1	yes	yes	3	0.0097741	64.827	By matching		By MS/MS
SVYRPLNPLAPSR	EENCFKPRSVYRPLNP	LNPLAPSRGEDDGESF	R	S	V	S	R	G	1	2	1	0	0	0	0	0	0	0	2	0	0	0	3	2	0	0	1	1	0	0	13	1	1468.82	Q14DR9;Q8R2E9	Q14DR9	212	224	Ero1lb	ERO1-like protein beta	yes	no	3	0.00020027	98.942	By matching		By MS/MS
TATPQQAQEVHEK	VWAIGTGKTATPQQAQ	QAQEVHEKLRGWLKSN	K	T	A	E	K	L	2	0	0	0	0	3	2	0	1	0	0	1	0	0	1	0	2	0	0	1	0	0	13	0	1465.72	P17751;H7BXC3	P17751	226	238	Tpi1	Triosephosphate isomerase	yes	no	3	0.0095435	65.043			By MS/MS
TCVADESAANCDK	QEVTDFAKTCVADESA	ESAANCDKSLHTLFGD	K	T	C	D	K	S	3	0	1	2	2	0	1	0	0	0	0	1	0	0	0	1	1	0	0	1	0	0	13	0	1439.57	Q546G4;P07724;K7R066	Q546G4	76	88	Alb	Serum albumin	yes	no	2	0.00023952	110.31
TGTLSRTNPPTQK	HGNNQPARTGTLSRTN	RTNPPTQKPPSPPVSG	R	T	G	Q	K	P	0	1	1	0	0	1	0	1	0	0	1	1	0	0	2	1	4	0	0	0	0	0	13	1	1399.74	Q3UBL3;B7ZCU2;B7ZCU5;Q3UAH6;Q3TPY5;Q3TMI0;Q6AXD3;B7ZCU4;B7ZCU3;Q3TJR5;Q3TJ64;B7ZCU0;J3QNK8;Q8CBW3-5;Q8CBW3-2;Q8CBW3-4;Q8CBW3-3;Q8CBW3	Q3UBL3	39	51	Abi1	Abl interactor 1	yes	no	2	0.0072806	67.519
TIPEEANIPIPVK	NVAPDMFRTIPEEANI	ANIPIPVKSDMVMIHG	R	T	I	V	K	S	1	0	1	0	0	0	2	0	0	3	0	1	0	0	3	0	1	0	0	1	0	0	13	0	1419.8	E9Q704;F8VQA4;P97467;Q8BQ31;Q3V1A8;F6T0D3	E9Q704	344	356	Pam	Peptidyl-glycine alpha-amidating monooxygenase;Peptidylglycine alpha-hydroxylating monooxygenase;Peptidyl-alpha-hydroxyglycine alpha-amidating lyase	yes	no	2	0.024075	64.827	By matching		By matching
TIQFVDWCPTGFK	IATIKTKRTIQFVDWC	DWCPTGFKVGINYQPP	R	T	I	F	K	V	0	0	0	1	1	1	0	1	0	1	0	1	0	2	1	0	2	1	0	1	0	0	13	0	1597.76	P68369;Q52L87;Q3TIZ0;P68373;Q5FW91;P05214;Q9D9Y2;Q9JJZ2	P68369	340	352	Tuba1a;Tuba1c;Tuba3a;Tuba8	Tubulin alpha-1A chain;Tubulin alpha-1C chain;Tubulin alpha-3 chain;Tubulin alpha-8 chain	yes	no	2	4.1745e-06	127.02					By MS/MS
TLELQGLINDLQR	QLQISNNRTLELQGLI	GLINDLQRERENLRQE	R	T	L	Q	R	E	0	1	1	1	0	2	1	1	0	1	4	0	0	0	0	0	1	0	0	0	0	0	13	0	1511.83	E9Q557;Q9CV95	E9Q557	1775	1787	Dsp	Desmoplakin	yes	no	2;3	3.2123e-17	204.48	By matching		By MS/MS
TLNDELEIIEGMK	VITVKDGKTLNDELEI	LEIIEGMKFDRGYISP	K	T	L	M	K	F	0	0	1	1	0	0	3	1	0	2	2	1	1	0	0	0	1	0	0	0	0	0	13	0	1503.75	P63038	P63038	206	218	Hspd1	60 kDa heat shock protein, mitochondrial	yes	yes	2	0.0014141	89.231			By matching
TLTLVDTGIGMTK	IIPNPQERTLTLVDTG	DTGIGMTKADLINNLG	R	T	L	T	K	A	0	0	0	1	0	0	0	2	0	1	2	1	1	0	0	0	4	0	0	1	0	0	13	0	1348.73	Q71LX8;P11499	Q71LX8	83	95	Hsp90ab1	Heat shock protein HSP 90-beta	yes	no	2	7.4364e-10	170.18	By MS/MS	By matching	By matching	By matching	By MS/MS
TPCQQELDQVLER	KLRPPPARTPCQQELD	ELDQVLERISTMRLPD	R	T	P	E	R	I	0	1	0	1	1	3	2	0	0	0	2	0	0	0	1	0	1	0	0	1	0	0	13	0	1614.77	P47877;D3YU40;Q9D057	P47877	205	217	Igfbp2	Insulin-like growth factor-binding protein 2	yes	no	2	4.5617e-23	226.06		By MS/MS		By MS/MS	By MS/MS
TSDALSTPNLDEK	NVQAERLRTSDALSTP	STPNLDEKPVIIASCL	R	T	S	E	K	P	1	0	1	2	0	0	1	0	0	0	2	1	0	0	1	2	2	0	0	0	0	0	13	0	1389.66	Q8K441	Q8K441	1262	1274	Abca6	ATP-binding cassette sub-family A member 6	yes	yes	2	0.0015038	88.338	By MS/MS	By MS/MS		By MS/MS
TSEGSWEPFASGK	VAVKVFKKTSEGSWEP	WEPFASGKTAESGELH	K	T	S	G	K	T	1	0	0	0	0	0	2	2	0	0	0	1	0	1	1	3	1	1	0	0	0	0	13	0	1381.62	Q5M9K1;P07309	Q5M9K1	56	68	Ttr	Transthyretin	yes	no	2	9.9635e-05	107.65			By MS/MS		By matching
TTPSYVAFTDTER	IANDQGNRTTPSYVAF	VAFTDTERLIGDAAKN	R	T	T	E	R	L	1	1	0	1	0	0	1	0	0	0	0	0	0	1	1	1	4	0	1	1	0	0	13	0	1486.69	Q3UBA6;Q3TZJ3;Q3TH56;Q3TEK2;P63017;Q504P4;Q3TF16;Q3TQ13;Q3UDS0;Q3ULM1;Q3TRH3;Q3TB63;B7U582;P17156;D3Z5E2;D3YW43;B2CSK2;A1L347;Q3TU85;Q3TAI8;A1E2B8;P16627;Q61696;P17879;Q9R2A1	Q3UBA6	37	49	Hspa8;Hspa2;Hspa1l;Hspa1b;Hspa1a;Hsc70t	Heat shock cognate 71 kDa protein;Heat shock-related 70 kDa protein 2;Heat shock 70 kDa protein 1-like;Heat shock 70 kDa protein 1A;Heat shock 70 kDa protein 1B	yes	no	2	0.00019972	101.32			By MS/MS		By MS/MS
VAAGVLCELAQDK	SSVENIQRVAAGVLCE	LCELAQDKEAADAIDA	R	V	A	D	K	E	3	0	0	1	1	1	1	1	0	0	2	1	0	0	0	0	0	0	0	2	0	0	13	0	1372.7	Q02257;F7CRC6;Q80VE7;Q3UZT7;Q02248	Q02257	603	615	Jup;Ctnnb1	Junction plakoglobin;Catenin beta-1	yes	no	2	0.019126	64.313			By matching
VAEDDEDDDVDTK	AEAPTGKRVAEDDEDD	EDDDVDTKKQKTEEDD	R	V	A	T	K	K	1	0	0	6	0	0	2	0	0	0	0	1	0	0	0	0	1	0	0	2	0	0	13	0	1464.57	Q3U6E4;Q0VGU2;Q8C2T3;Q3U8X6;Q3UA54;P26350;Q8CAQ5	Q3U6E4	91	103	Ptma;Gm12504	Prothymosin alpha;Prothymosin alpha, N-terminally processed;Thymosin alpha	yes	no	2	0.0017853	85.837			By MS/MS
VALTGLTVAEYFR	EPPGARARVALTGLTV	LTVAEYFRDQEGQDVL	R	V	A	F	R	D	2	1	0	0	0	0	1	1	0	0	2	0	0	1	0	0	2	0	1	2	0	0	13	0	1438.78	P56480	P56480	282	294	Atp5b	ATP synthase subunit beta, mitochondrial	yes	yes	2	1.6654e-06	131.06			By matching
VCVQTVESGAMTK	RFAQTLEKVCVQTVES	VESGAMTKDLAGCIHG	K	V	C	T	K	D	1	0	0	0	1	1	1	1	0	0	0	1	1	0	0	1	2	0	0	3	0	0	13	0	1408.67	P54071	P54071	401	413	Idh2	Isocitrate dehydrogenase [NADP], mitochondrial	yes	yes	2	0.00014708	102.33
VDYAGVTVDELGK	EPPQHALRVDYAGVTV	VTVDELGKVLTPTQVM	R	V	D	G	K	V	1	0	0	2	0	0	1	2	0	0	1	1	0	0	0	0	1	0	1	3	0	0	13	0	1364.68	Q5EBQ2;Q3TGC5;P70296;D3Z1V4;D6RHS6	Q5EBQ2	27	39	Pebp1	Phosphatidylethanolamine-binding protein 1;Hippocampal cholinergic neurostimulating peptide	yes	no	2	6.8785e-06	129.54	By MS/MS		By MS/MS		By MS/MS
VFITDDFHDMMPK	YIKLYVRRVFITDDFH	DFHDMMPKYLNFVKGV	R	V	F	P	K	Y	0	0	0	3	0	0	0	0	1	1	0	1	2	2	1	0	1	0	0	1	0	0	13	0	1594.72	Q91V38;Q3UAD6;P08113;Q3UBU0;Q3TUD6;Q8CCY5;F7C312	Q91V38	416	428	Hsp90b1	Endoplasmin	yes	no	2;3	0.00067436	88.163			By MS/MS		By MS/MS
VIPLFSPQCGECR	TCVKPGDKVIPLFSPQ	SPQCGECRICKHPESN	K	V	I	C	R	I	0	1	0	0	2	1	1	1	0	1	1	0	0	1	2	1	0	0	0	1	0	0	13	0	1561.74	Q3UKA4;P00329	Q3UKA4	90	102	Adh1	Alcohol dehydrogenase 1	yes	no	2	0.00092282	94.122
VISLSGEHSIIGR	ANVSIEDRVISLSGEH	GEHSIIGRTMVVHEKQ	R	V	I	G	R	T	0	1	0	0	0	0	1	2	1	3	1	0	0	0	0	3	0	0	0	1	0	0	13	0	1366.76	P08228	P08228	104	116	Sod1	Superoxide dismutase [Cu-Zn]	yes	yes	2;3	2.8605e-06	122.39			By MS/MS		By MS/MS
VITNFNSAHDTDR	RCLGVPSRVITNFNSA	NSAHDTDRNLSVDVYY	R	V	I	D	R	N	1	1	2	2	0	0	0	0	1	1	0	0	0	1	0	1	2	0	0	1	0	0	13	0	1488.7	Q08189	Q08189	293	305	Tgm3	Protein-glutamine gamma-glutamyltransferase E;Protein-glutamine gamma-glutamyltransferase E 50 kDa catalytic chain;Protein-glutamine gamma-glutamyltransferase E 27 kDa non-catalytic chain	yes	yes	3	3.2437e-06	120.87			By MS/MS
VKEGMNIVEAMER	GKHVVFGKVKEGMNIV	NIVEAMERFGSRNGKT	K	V	K	E	R	F	1	1	1	0	0	0	3	1	0	1	0	1	2	0	0	0	0	0	0	2	0	0	13	1	1504.74	Q5SVY2;Q3UAJ1;Q3TE63;P17742;Q9CZK9	Q5SVY2	132	144	Ppia	Peptidyl-prolyl cis-trans isomerase;Peptidyl-prolyl cis-trans isomerase A;Peptidyl-prolyl cis-trans isomerase A, N-terminally processed	yes	no	2	0.034229	51.726	By matching	By matching			By matching
VNPDEVGGEALGR	AVSCLWAKVNPDEVGG	VGGEALGRLLVVYPWT	K	V	N	G	R	L	1	1	1	1	0	0	2	3	0	0	1	0	0	0	1	0	0	0	0	2	0	0	13	0	1311.64	Q54AH9;Q549D9;A8DV59;A8DV41;P02089	Q54AH9	18	30	Hbb-b2;Hbbt2	Hemoglobin subunit beta-2	yes	no	2	0.0044561	80.96			By MS/MS
VNSDEVGGEALGR	AVSCLWGKVNSDEVGG	VGGEALGRLLVVYPWT	K	V	N	G	R	L	1	1	1	1	0	0	2	3	0	0	1	0	0	0	0	1	0	0	0	2	0	0	13	0	1301.62	A8DUK0;P02088;A8DUP5;A8DUP7;A8DUM2;A8DUP3;B1Q450;Q61650;Q61348	A8DUK0	19	31	Hbbt1;Hbb-b1;HBB1	Hemoglobin subunit beta-1	yes	no	2	5.7893e-06	124.42			By MS/MS		By MS/MS
VPDVLVADPPTAR	EPRRPRYRVPDVLVAD	VADPPTARLSVSGRDD	R	V	P	A	R	L	2	1	0	2	0	0	0	0	0	0	1	0	0	0	3	0	1	0	0	3	0	0	13	0	1348.74	Q3UE86;A1A4T2;Q8BHN3;Q8BHN3-2	Q3UE86	115	127	Ganab	Neutral alpha-glucosidase AB	yes	no	2	0.044547	57.034
VVDDWANDGWGLK	FIISGDRRVVDDWAND	ANDGWGLKKAADGAAE	R	V	V	L	K	K	1	0	1	3	0	0	0	2	0	0	1	1	0	0	0	0	0	2	0	2	0	0	13	0	1473.69	Q5SUC3;Q3TXE5;P35564	Q5SUC3	447	459	Canx	Calnexin	yes	no	2	8.7568e-05	109
WDTLPIAEVTVEK	IYESVDDKWDTLPIAE	IAEVTVEKVRGFCEGF	K	W	D	E	K	V	1	0	0	1	0	0	2	0	0	1	1	1	0	0	1	0	2	1	0	2	0	0	13	0	1499.79	Q9D8U3	Q9D8U3	232	244	Erp27	Endoplasmic reticulum resident protein 27	yes	yes	2	0.028387	63.185			By MS/MS
YEYPDELQCVNLK	WGSITPVKYEYPDELQ	ELQCVNLKLLPNEDCA	K	Y	E	L	K	L	0	0	1	1	1	1	2	0	0	0	2	1	0	0	1	0	0	0	2	1	0	0	13	0	1669.77	A0A0B6VSQ6;P15947;A0A0U1RPN5	A0A0B6VSQ6	165	177	Klk1	Kallikrein-1	yes	no	2	0.00038259	99.5			By MS/MS
YIGNMHGNEAVGR	EPGEPEFKYIGNMHGN	HGNEAVGRELLIFLAQ	K	Y	I	G	R	E	1	1	2	0	0	0	1	3	1	1	0	0	1	0	0	0	0	0	1	1	0	0	13	0	1416.66	Q543R4;Q00493	Q543R4	109	121	Cpe	Carboxypeptidase E	yes	no	2;3	1.0739e-08	150.11	By MS/MS		By MS/MS		By matching
YSDMIVAAIQAEK	KKSTDHPKYSDMIVAA	VAAIQAEKNRAGSSRQ	K	Y	S	E	K	N	3	0	0	1	0	1	1	0	0	2	0	1	1	0	0	1	0	0	1	1	0	0	13	0	1437.72	Q8C1Y3;Q3U4Y0;P10922	Q8C1Y3	28	40	H1f0	Histone H1.0;Histone H1.0, N-terminally processed	yes	no	2	0.0012535	83.692			By matching
AAAEVNQEYGLDPK	QAFGILKRAAAEVNQE	QEYGLDPKIASAIMKA	R	A	A	P	K	I	3	0	1	1	0	1	2	1	0	0	1	1	0	0	1	0	0	0	1	1	0	0	14	0	1503.72	P97807-2;P97807	P97807-2	59	72	Fh	Fumarate hydratase, mitochondrial	yes	no	2	0.0056745	73.386
AFDSGIIPMEFVNK	AAAKMFSKAFDSGIIP	IPMEFVNKMKKEGKLI	K	A	F	N	K	M	1	0	1	1	0	0	1	1	0	2	0	1	1	2	1	1	0	0	0	1	0	0	14	0	1566.78	Q3TED3;Q3V117;Q91V92;Q3UEA1;Q8VDM8;Q3UVY4;Q99K05	Q3TED3	939	952	Acly	ATP-citrate synthase	yes	no	2	1.7273e-07	131.35	By matching				By MS/MS
AGEVINQPMMMAAR	DEEFPEQKAGEVINQP	QPMMMAARQLHDEARK	K	A	G	A	R	Q	3	1	1	0	0	1	1	1	0	1	0	0	3	0	1	0	0	0	0	1	0	0	14	0	1517.72	Q64727	Q64727	890	903	Vcl	Vinculin	yes	yes	2	0.00040649	95.183				By MS/MS
AIESMEQQLSELKK	ELQDDKRKAIESMEQQ	QQLSELKKTLSTVQNE	K	A	I	K	K	T	1	0	0	0	0	2	3	0	0	1	2	2	1	0	0	2	0	0	0	0	0	0	14	1	1632.84	Q3V1L5;Q7M739;F6ZDS4	Q3V1L5	1025	1038	Tpr	Nucleoprotein TPR	yes	no	2	0.00175	97.716		By MS/MS		By matching	By MS/MS
ALLQAILQTEDMLK	LNSLCSVRALLQAILQ	LQTEDMLKVYEARLTE	R	A	L	L	K	V	2	0	0	1	0	2	1	0	0	1	4	1	1	0	0	0	1	0	0	0	0	0	14	0	1585.87	E9Q557;E9PZW0	E9Q557	784	797	Dsp	Desmoplakin	yes	no	2	6.4298e-08	162.72	By MS/MS	By MS/MS	By MS/MS		By matching
ALMGSPQLVAAVVR	SKKEASRRALMGSPQL	QLVAAVVRTMQNTSDL	R	A	L	V	R	T	3	1	0	0	0	1	0	1	0	0	2	0	1	0	1	1	0	0	0	3	0	0	14	0	1410.8	Q02257	Q02257	178	191	Jup	Junction plakoglobin	yes	yes	2	2.7195e-05	102.87			By MS/MS
ALPFWNEEIVPQIK	SLKDTIARALPFWNEE	EEIVPQIKEGKRVLIA	R	A	L	I	K	E	1	0	1	0	0	1	2	0	0	2	1	1	0	1	2	0	0	1	0	1	0	0	14	0	1682.9	Q3U7Z6;Q9DBJ1;Q6NWV5	Q3U7Z6	163	176	Pgam1	Phosphoglycerate mutase 1	yes	no	2	1.8475e-06	117.03	By MS/MS	By MS/MS		By MS/MS	By MS/MS
AQQVSQGLDVLTAK	ASPVAMQKAQQVSQGL	GLDVLTAKVENAARKL	K	A	Q	A	K	V	2	0	0	1	0	3	0	1	0	0	2	1	0	0	0	1	1	0	0	2	0	0	14	0	1456.79	Q64727	Q64727	353	366	Vcl	Vinculin	yes	yes	2	4.4027e-07	123.95		By MS/MS		By MS/MS	By matching
AVQGMLDFDYVCSR	IVWGMQTRAVQGMLDF	DFDYVCSRDEPSVAAM	R	A	V	S	R	D	1	1	0	2	1	1	0	1	0	0	1	0	1	1	0	1	0	0	1	2	0	0	14	0	1659.74	Q3TED3;Q3V117;Q91V92;Q3UEA1	Q3TED3	498	511	Acly	ATP-citrate synthase	yes	no	2	9.0551e-08	161.21					By MS/MS
AVTEQGAELSNEER	DDMATCMKAVTEQGAE	AELSNEERNLLSVAYK	K	A	V	E	R	N	2	1	1	0	0	1	4	1	0	0	1	0	0	0	0	1	1	0	0	1	0	0	14	0	1531.71	A3KML3;F6YY69;F6VW30;P68254-2;P68254	A3KML3	28	41	Ywhaq	14-3-3 protein theta	yes	no	2	1.4885e-30	230.36
AVTEQGHELSNEER	DDMAAAMKAVTEQGHE	HELSNEERNLLSVAYK	K	A	V	E	R	N	1	1	1	0	0	1	4	1	1	0	1	0	0	0	0	1	1	0	0	1	0	0	14	0	1597.73	A2A5N2;Q9CQV8-2;Q9CQV8;A2A5N1	A2A5N2	30	43	Ywhab	14-3-3 protein beta/alpha;14-3-3 protein beta/alpha, N-terminally processed	yes	no	2	1.9803e-25	219.52					By MS/MS
CIAQMVNSQAANIR	TIRDMVVRCIAQMVNS	NSQAANIRSGWKNIFS	R	C	I	I	R	S	3	1	2	0	1	2	0	0	0	2	0	0	1	0	0	1	0	0	0	1	0	0	14	0	1574.77	G3X9K3	G3X9K3	1256	1269	Arfgef1	Brefeldin A-inhibited guanine nucleotide-exchange protein 1	yes	yes	2	0.0039774	72.29	By MS/MS		By matching
DAVLNAWAEDVDLR	GIFPVLCKDAVLNAWA	WAEDVDLRVNLAMDVG	K	D	A	L	R	V	3	1	1	3	0	0	1	0	0	0	2	0	0	0	0	0	0	1	0	2	0	0	14	0	1585.77	P52480;P52480-2	P52480	476	489	Pkm	Pyruvate kinase PKM	no	no	2	1.4885e-30	230.36	By matching		By matching		By MS/MS
DFPEEVAIAEELGR	LVKGRGRRDFPEEVAI	AIAEELGRRHADGSFS	R	D	F	G	R	R	2	1	0	1	0	0	4	1	0	1	1	0	0	1	1	0	0	0	0	1	0	0	14	0	1573.76	P55095;A2AS86	P55095	131	144	Gcg	Glucagon;Glicentin;Glicentin-related polypeptide;Oxyntomodulin;Glucagon;Glucagon-like peptide 1;Glucagon-like peptide 1(7-37);Glucagon-like peptide 1(7-36);Glucagon-like peptide 2	yes	no	2;3	1.4601e-07	132.09	By MS/MS		By MS/MS	By MS/MS	By MS/MS
DLAILLGMLDPVEK	PIIDDKGRDLAILLGM	GMLDPVEKDDNNMPVT	R	D	L	E	K	D	1	0	0	2	0	0	1	1	0	1	4	1	1	0	1	0	0	0	0	1	0	0	14	0	1525.84	Q53ZU7;O08709;Q6GT24;D3Z0Y2;Q6A0D0;Q8BPD3	Q53ZU7	109	122	Prdx6	Peroxiredoxin-6	yes	no	2	0.0075949	71.98					By MS/MS
DLGATWVVLGHSER	EISPGMIKDLGATWVV	VVLGHSERRHVFGESD	K	D	L	E	R	R	1	1	0	1	0	0	1	2	1	0	2	0	0	0	0	1	1	1	0	2	0	0	14	0	1538.78	P17751;H7BXC3	P17751	136	149	Tpi1	Triosephosphate isomerase	yes	no	2;3	2.627e-08	164.92		By matching			By MS/MS
DLISHDELFSDIYK	________________	ELFSDIYKIREIADGL	R	D	L	Y	K	I	0	0	0	3	0	0	1	0	1	2	2	1	0	1	0	2	0	0	1	0	0	0	14	0	1693.82	P63028	P63028	6	19	Tpt1	Translationally-controlled tumor protein	yes	yes	2;3	0.00041542	96.27
DSMIWDCTCIGAGR	GDTYERPKDSMIWDCT	CTCIGAGRGRISCTIA	K	D	S	G	R	G	1	1	0	2	2	0	0	2	0	2	0	0	1	0	0	1	1	1	0	0	0	0	14	0	1640.67	B7ZNJ1;Q3UH17;A0A087WS56;B9EHT6;A0A087WSN6;Q3UHL6;Q3UGY5;A0A087WR50;P11276;Q3TBB4;Q3TCF1;Q3TCL7;Q4KL80	B7ZNJ1	118	131	Fn1	Fibronectin;Anastellin	yes	no	2	2.4443e-05	104.41					By MS/MS
DSTYSLSSTLTLSK	SVTEQDSKDSTYSLSS	SSTLTLSKADYEKHKV	K	D	S	S	K	A	0	0	0	1	0	0	0	0	0	0	3	1	0	0	0	5	3	0	1	0	0	0	14	0	1501.75	A0A097PUD0;A0A097PUG4	A0A097PUD0	191	204			yes	no	2	0.0019944	83.692			By MS/MS
DTGVISVLTSGLDR	KNMFTVNRDTGVISVL	VLTSGLDRESYPTYTL	R	D	T	D	R	E	0	1	0	2	0	0	0	2	0	1	2	0	0	0	0	2	2	0	0	2	0	0	14	0	1431.76	Q4KML8;A0A0R4IZW5;P09803	Q4KML8	324	337	Cdh1	Cadherin-1;E-Cad/CTF1;E-Cad/CTF2;E-Cad/CTF3	yes	no	2	2.3043e-05	105.19			By matching
DVMICPDTSLEDAK	KDPVQCSRDVMICPDT	DTSLEDAKTQGPYDVV	R	D	V	A	K	T	1	0	0	3	1	0	1	0	0	1	1	1	1	0	1	1	1	0	0	1	0	0	14	0	1592.71	A2A813;Q99LX0;A2A815;D3K2X3;A2A817;A2A816	A2A813	49	62	Park7;Dj1	Protein deglycase DJ-1	yes	no	2	6.3622e-07	119.87			By matching		By MS/MS
EATESFASDPILYR	AETIKNVREATESFAS	ASDPILYRPVAVALDT	R	E	A	Y	R	P	2	1	0	1	0	0	2	0	0	1	1	0	0	1	1	2	1	0	1	0	0	0	14	0	1597.76	P52480;P52480-2	P52480	93	106	Pkm	Pyruvate kinase PKM	no	no	2	3.3535e-06	116.19			By MS/MS		By matching
EATNPPIIQEEKPK	DFISYLQREATNPPII	IIQEEKPKKKKKAQED	R	E	A	P	K	K	1	0	1	0	0	1	3	0	0	2	0	2	0	0	3	0	1	0	0	0	0	0	14	1	1592.84	P27773	P27773	483	496	Pdia3	Protein disulfide-isomerase A3	yes	yes	3	0.00035243	88.78			By MS/MS
ELENLAAMDLELQK	VLTAEEKKELENLAAM	AMDLELQKIAEKFSQR	K	E	L	Q	K	I	2	0	1	1	0	1	3	0	0	0	4	1	1	0	0	0	0	0	0	0	0	0	14	0	1615.81	Q3UZU8;Q3TY66;P16014;Q8BP91	Q3UZU8	654	667	Chgb	Secretogranin-1;CCB peptide;PE-11	yes	no	2;3	3.9435e-07	125.22	By matching		By MS/MS
ELISNASDALDKIR	KNKEIFLRELISNASD	SDALDKIRLISLTDEN	R	E	L	I	R	L	2	1	1	2	0	0	1	0	0	2	2	1	0	0	0	2	0	0	0	0	0	0	14	1	1543.82	Q91V38;Q3UAD6;P08113;Q3UBU0;Q8C2R2;Q71LX8;P11499;D3Z1R1;E9PX27	Q91V38	103	116	Hsp90b1;Hsp90ab1	Endoplasmin;Heat shock protein HSP 90-beta	no	no	3	0.00021409	94.09					By MS/MS
FAIQDISVEETSAK	MIWTIILRFAIQDISV	SVEETSAKEGLLLWCQ	R	F	A	A	K	E	2	0	0	1	0	1	2	0	0	2	0	1	0	1	0	2	1	0	0	1	0	0	14	0	1536.77	Q1A602;Q3ULT2;Q3UDJ7;P57780;A1BN54;Q7TPR4;E9Q2W9;D3Z0L8;O88990;D3Z761;Q8K3Q4;Q5FW75;Q9JI91	Q1A602	153	166	Actn4;Actn1;Actn3;Actn2	Alpha-actinin-4;Alpha-actinin-1;Alpha-actinin-3;Alpha-actinin-2	yes	no	2	5.3808e-07	121.24			By MS/MS
FAMEPEEFDSDTLR	ILDESGKKFAMEPEEF	EFDSDTLREFVTAFKK	K	F	A	L	R	E	1	1	0	2	0	0	3	0	0	0	1	0	1	2	1	1	1	0	0	0	0	0	14	0	1685.72	A0A0R4J0Z1;P08003	A0A0R4J0Z1	482	495	Pdia4	Protein disulfide-isomerase A4	yes	no	2	1.6464e-07	140.82			By MS/MS		By MS/MS
FGFPEGSVELYAEK	LTAVVQKRFGFPEGSV	SVELYAEKVATRGLCA	R	F	G	E	K	V	1	0	0	0	0	0	3	2	0	0	1	1	0	2	1	1	0	0	1	1	0	0	14	0	1571.75	Q9D0A2;Q9CZP6;Q5YLW3;Q3UK56;Q3UCL7;P62908;O89068;A0A140LI77;D3YV43	Q9D0A2	77	90	Rps3	40S ribosomal protein S3	yes	no	2	0.037885	57.794
FISDKDASVVGFFR	RTEEEFKKFISDKDAS	ASVVGFFRDLFSDGHS	K	F	I	F	R	D	1	1	0	2	0	0	0	1	0	1	0	1	0	3	0	2	0	0	0	2	0	0	14	1	1586.81	P27773	P27773	148	161	Pdia3	Protein disulfide-isomerase A3	yes	yes	2	1.9088e-20	141.59					By MS/MS
FIWYNNVINPTLPK	VGDLQKVKFIWYNNVI	VINPTLPKVGASRITV	K	F	I	P	K	V	0	0	3	0	0	0	0	0	0	2	1	1	0	1	2	0	1	1	1	1	0	0	14	0	1717.92	Q6P8U6	Q6P8U6	417	430	Pnlip	Pancreatic triacylglycerol lipase	yes	yes	2	5.2672e-06	115.12	By MS/MS		By matching
FLWNNHVVNPSFPK	VGTIEKVKFLWNNHVV	VVNPSFPKVGAAKITV	K	F	L	P	K	V	0	0	3	0	0	0	0	0	1	0	1	1	0	2	2	1	0	1	0	2	0	0	14	0	1697.87	Q5BKQ4	Q5BKQ4	418	431	Pnliprp1	Inactive pancreatic lipase-related protein 1	yes	yes	3	0.00031843	88.561	By MS/MS		By MS/MS
FTQAGSEVSALLGR	LFIDNIFRFTQAGSEV	EVSALLGRIPSAVGYQ	R	F	T	G	R	I	2	1	0	0	0	1	1	2	0	0	2	0	0	1	0	2	1	0	0	1	0	0	14	0	1434.75	P56480	P56480	311	324	Atp5b	ATP synthase subunit beta, mitochondrial	yes	yes	2	2.2983e-07	129.77			By matching
FVTVQTISGTGALR	NEVLKSGRFVTVQTIS	ISGTGALRVGASFLQR	R	F	V	L	R	V	1	1	0	0	0	1	0	2	0	1	1	0	0	1	0	1	3	0	0	2	0	0	14	0	1448.8	P05202	P05202	126	139	Got2	Aspartate aminotransferase, mitochondrial	yes	yes	2	1.2667e-07	147.26			By MS/MS
GDGPVQGTIHFEQK	MKAVCVLKGDGPVQGT	GTIHFEQKASGEPVVL	K	G	D	Q	K	A	0	0	0	1	0	2	1	3	1	1	0	1	0	1	1	0	1	0	0	1	0	0	14	0	1511.74	P08228;Q8C355	P08228	11	24	Sod1	Superoxide dismutase [Cu-Zn]	yes	no	2;3	1.1691e-08	171.26			By MS/MS
GDVTTQVALQPALK	KYHEALAKGDVTTQVA	VALQPALKFNGGGHIN	K	G	D	L	K	F	2	0	0	1	0	2	0	1	0	0	2	1	0	0	1	0	2	0	0	2	0	0	14	0	1439.8	Q4FJX9;Q3U8W4;P09671	Q4FJX9	76	89	Sod2	Superoxide dismutase;Superoxide dismutase [Mn], mitochondrial	yes	no	2	0.00037099	97.69
GILAADESTGSIAK	HRIVAPGKGILAADES	ESTGSIAKRLQSIGTE	K	G	I	A	K	R	3	0	0	1	0	0	1	2	0	2	1	1	0	0	0	2	1	0	0	0	0	0	14	0	1331.69	Q5FWB7;A6ZI44;P05064;Q6NY00;D3YWI1;A0A0U1RPN8;D3YV98;A0A0U1RPT5;D3Z510;A6ZI47	Q5FWB7	29	42	Aldoa;Aldoart2	Fructose-bisphosphate aldolase;Fructose-bisphosphate aldolase A	yes	no	2	1.2597e-07	136.24			By MS/MS		By MS/MS
GTCEQGPSIVTPPK	KAITQVSKGTCEQGPS	PSIVTPPKDIWNVTGA	K	G	T	P	K	D	0	0	0	0	1	1	1	2	0	1	0	1	0	0	3	1	2	0	0	1	0	0	14	0	1469.72	Q3U131;Q811C8;A0A5E1;Q3UFA6;F8WH23;Q61581	Q3U131	125	138	Igfbp7	Insulin-like growth factor-binding protein 7	yes	no	2	0.020051	65.219			By MS/MS
GVDEVTIVNILTNR	IETAVKTKGVDEVTIV	IVNILTNRSNVQRQDI	K	G	V	N	R	S	0	1	2	1	0	0	1	1	0	2	1	0	0	0	0	0	2	0	0	3	0	0	14	0	1541.84	Q542G9;P07356;Q3UCD3;Q9CZI7;B0V2N7;B0V2N8	Q542G9	50	63	Anxa2	Annexin;Annexin A2	yes	no	2	1.1052e-07	135.02	By MS/MS		By MS/MS
GVQIPLPEGINFVR	LLNERTWRGVQIPLPE	PEGINFVREVVTNHAG	R	G	V	V	R	E	0	1	1	0	0	1	1	2	0	2	1	0	0	1	2	0	0	0	0	2	0	0	14	0	1537.86	A2A5K2;Q4FJT5;Q3UFS5;P55065	A2A5K2	381	394	Pltp	Phospholipid transfer protein	yes	no	2	5.391e-07	139.78	By MS/MS	By MS/MS		By matching	By MS/MS
GVVDSDDLPLNVSR	PKYLNFVKGVVDSDDL	DLPLNVSRETLQQHKL	K	G	V	S	R	E	0	1	1	3	0	0	0	1	0	0	2	0	0	0	1	2	0	0	0	3	0	0	14	0	1484.75	Q91V38;Q3UAD6;P08113;Q3UBU0;Q3TUD6;Q8CCY5;F7C312	Q91V38	435	448	Hsp90b1	Endoplasmin	yes	no	2	1.2702e-07	136.33	By MS/MS		By MS/MS		By MS/MS
GVVDSEDLPLNISR	PEYLNFIRGVVDSEDL	DLPLNISREMLQQSKI	R	G	V	S	R	E	0	1	1	2	0	0	1	1	0	1	2	0	0	0	1	2	0	0	0	2	0	0	14	0	1512.78	Q80Y52;Q3UIF3;Q3TKA2;P07901;Q3TJU7;A0PJ91;Q3TKB9;Q8C5U3;Q3TKG0;Q71LX8;P11499;Q80YC2;Q811H6;E9Q3D6	Q71LX8	379	392	Hsp90aa1;Hsp90ab1	Heat shock protein HSP 90-alpha;Heat shock protein HSP 90-beta	no	no	2	4.5514e-09	177.38	By MS/MS	By matching	By MS/MS	By MS/MS	By matching
GWDQGLLGMCEGEK	LGTGQVIKGWDQGLLG	LGMCEGEKRKLVIPSE	K	G	W	E	K	R	0	0	0	1	1	1	2	4	0	0	2	1	1	0	0	0	0	1	0	0	0	0	14	0	1578.68	Q3TND1;P45878;Q3UND3	Q3TND1	86	99	Fkbp2	Peptidyl-prolyl cis-trans isomerase;Peptidyl-prolyl cis-trans isomerase FKBP2	yes	no	2	2.2096e-09	147.39					By MS/MS
GYDVIAQAQSGTGK	RAILPCIKGYDVIAQA	QAQSGTGKTATFAISI	K	G	Y	G	K	T	2	0	0	1	0	2	0	3	0	1	0	1	0	0	0	1	1	0	1	1	0	0	14	0	1393.68	Q3TLL6;Q4FZL1;Q5F2A7;Q3UXC2;Q3TGK7;Q3TFG3;P60843;Q3TSJ4;Q78WR5;Q8BTU6;Q52KC1;P10630;P10630-2	Q3TLL6	69	82	Eif4a1;Eif4a2	Eukaryotic initiation factor 4A-I;Eukaryotic initiation factor 4A-II;Eukaryotic initiation factor 4A-II, N-terminally processed	yes	no	2	2.0025e-07	142.1
IECDDKGDGSCDVR	VEGPSQAKIECDDKGD	GDGSCDVRYWPQEAGE	K	I	E	V	R	Y	0	1	0	4	2	0	1	2	0	1	0	1	0	0	0	1	0	0	0	1	0	0	14	1	1624.65	B7FAV1;B9EKP5;B7FAU9;Q8BTM8;Q3U7N9;D3YW87;D3Z576;Q8VHX6-2;Q8VHX6	B7FAV1	597	610	Flna;Flnc	Filamin-A;Filamin-C	yes	no	3	0.044511	42.52					By MS/MS
IHIMPSLNPDGFEK	VNLIHSTRIHIMPSLN	LNPDGFEKAASQPGEL	R	I	H	E	K	A	0	0	1	1	0	0	1	1	1	2	1	1	1	1	2	1	0	0	0	0	0	0	14	0	1596.8	Q543R4;Q00493	Q543R4	151	164	Cpe	Carboxypeptidase E	yes	no	2;3	0.00020006	96.756	By MS/MS		By MS/MS
IIPGFMCQGGDFTR	YKGSSFHRIIPGFMCQ	CQGGDFTRHNGTGGRS	R	I	I	T	R	H	0	1	0	1	1	1	0	3	0	2	0	0	1	2	1	0	1	0	0	0	0	0	14	0	1597.74	Q5SVY2;Q3UAJ1;Q3TE63;P17742;Q9CZK9;F8VPN3	Q5SVY2	56	69	Ppia;Gm5160	Peptidyl-prolyl cis-trans isomerase;Peptidyl-prolyl cis-trans isomerase A;Peptidyl-prolyl cis-trans isomerase A, N-terminally processed	yes	no	2	9.8082e-08	134.61	By MS/MS	By MS/MS	By MS/MS	By MS/MS	By MS/MS
ITPSYVAFTPEGER	IANDQGNRITPSYVAF	AFTPEGERLIGDAAKN	R	I	T	E	R	L	1	1	0	0	0	0	2	1	0	1	0	0	0	1	2	1	2	0	1	1	0	0	14	0	1565.77	Q3U9G2;Q3TWF2;P20029;Q9DC41;Q3TKF8;Q3TI47;Q3U7T8;Q3U6V3;Q3UEM8	Q3U9G2	62	75	Hspa5	78 kDa glucose-regulated protein	yes	no	2	4.5467e-05	116.19	By MS/MS		By matching		By MS/MS
KNSLEKNIEICSQK	EFELMNRKKNSLEKNI	NIEICSQKLVRAEKLI	K	K	N	Q	K	L	0	0	2	0	1	1	2	0	0	2	1	3	0	0	0	2	0	0	0	0	0	0	14	2	1689.87	A0A140LIN9;Q8BW94-2;Q8BW94	A0A140LIN9	2185	2198	Dnah3	Dynein heavy chain 3, axonemal	yes	no	2	0.0028303	78.529	By MS/MS	By matching		By MS/MS
LGAVDESLSEETQK	EECEQAERLGAVDESL	SLSEETQKAVLQWTKH	R	L	G	Q	K	A	1	0	0	1	0	1	3	1	0	0	2	1	0	0	0	2	1	0	0	1	0	0	14	0	1504.73	Q4FK57;Q4FJZ3;Q8R180;Q3TXL0	Q4FK57	136	149	Ero1l	ERO1-like protein alpha	yes	no	2	0.0019944	83.692
LGDVISIQPCPDVK	VRNNLRVRLGDVISIQ	IQPCPDVKYGKRIHVL	R	L	G	V	K	Y	0	0	0	2	1	1	0	1	0	2	1	1	0	0	2	1	0	0	0	2	0	0	14	0	1539.8	Q01853;Q8BNF8	Q01853	96	109	Vcp	Transitional endoplasmic reticulum ATPase	yes	no	2	9.3944e-05	111.12
LGGSAVISLEGKPL	DRCTLAEKLGGSAVIS	ISLEGKPL________	K	L	G	P	L	-	1	0	0	0	0	0	1	3	0	1	3	1	0	0	1	2	0	0	0	1	0	0	14	1	1339.77	Q544Y7;P18760	Q544Y7	153	166	Cfl1	Cofilin-1	yes	no	2	0.001859	96.135		By matching	By matching		By MS/MS
LGLVGVNLSLDGVK	QLIKRRGKLGLVGVNL	NLSLDGVKSWLKPRLG	K	L	G	V	K	S	0	0	1	1	0	0	0	3	0	0	4	1	0	0	0	1	0	0	0	3	0	0	14	0	1382.81	Q3TED3;Q3V117;Q91V92;Q3UEA1;Q3TS02	Q3TED3	69	82	Acly	ATP-citrate synthase	yes	no	2	2.3829e-07	129.54	By matching		By matching		By MS/MS
LISWYDNEYGYSNR	ALNDNFVKLISWYDNE	NEYGYSNRVV______	K	L	I	N	R	V	0	1	2	1	0	0	1	1	0	1	1	0	0	0	0	2	0	1	3	0	0	0	14	0	1778.79	S4R257;D2KHZ9;A0A0A0MQF6;P16858;S4R1W1;Q3TUZ9;D3YYI5;W8QM43;Q4VBD1	S4R257	265	278	Gapdh;GAPDH;Gm3839;Gm10481;Gm7293	Glyceraldehyde-3-phosphate dehydrogenase	yes	no	2	5.3832e-16	198.14			By matching		By MS/MS
LQSIGTENTEENRR	STGSIAKRLQSIGTEN	ENTEENRRFYRQLLLT	R	L	Q	R	R	F	0	2	2	0	0	1	3	1	0	1	1	0	0	0	0	1	2	0	0	0	0	0	14	1	1645.8	Q5FWB7;A6ZI44;P05064;Q6NY00;D3YWI1;Q9CPQ9;A6ZI46;A0A0U1RPN8;D3YV98;A0A0U1RPT5;D3Z510;A6ZI47	Q5FWB7	44	57	Aldoa;Aldoart1;Aldoart2	Fructose-bisphosphate aldolase;Fructose-bisphosphate aldolase A	yes	no	3	9.8181e-08	145					By MS/MS
LVINGKPITIFQER	TVKAENGKLVINGKPI	PITIFQERDPTNIKWG	K	L	V	E	R	D	0	1	1	0	0	1	1	1	0	3	1	1	0	1	1	0	1	0	0	1	0	0	14	1	1626.95	S4R257;D2KHZ9;A0A0A0MQF6;P16858;S4R1W1;S4R1W8	S4R257	22	35	Gapdh;GAPDH;Gm3839	Glyceraldehyde-3-phosphate dehydrogenase	yes	no	3	0.0020429	78.505
LVSEDPINDGEWHR	QLGSGEARLVSEDPIN	INDGEWHRITALREGQ	R	L	V	H	R	I	0	1	1	2	0	0	2	1	1	1	1	0	0	0	1	1	0	1	0	1	0	0	14	0	1665.77	B1B0C7;E9PZ16;Q52KG8;Q5RKM8;Q3UHH3	B1B0C7	4266	4279	Hspg2		yes	no	3	0.0018659	73.927
LYTLVLTDPDAPSR	WDGLDPGKLYTLVLTD	TDPDAPSRKDPKFREW	K	L	Y	S	R	K	1	1	0	2	0	0	0	0	0	0	3	0	0	0	2	1	2	0	1	1	0	0	14	0	1559.82	Q5EBQ2;Q3TGC5;P70296;D3Z1V4;D6RHS6	Q5EBQ2	63	76	Pebp1	Phosphatidylethanolamine-binding protein 1;Hippocampal cholinergic neurostimulating peptide	yes	no	2	1.7178e-07	139.86	By MS/MS		By matching	By matching	By MS/MS
MEALILEPSLYTVK	________________	EPSLYTVKAILILDND	-	M	E	V	K	A	1	0	0	0	0	0	2	0	0	1	3	1	1	0	1	1	1	0	1	1	0	0	14	0	1605.87	Q8R3M1;Q542M2;P61924	Q8R3M1	1	14	Copz1	Coatomer subunit zeta-1	yes	no	2	0.0022758	78.505					By MS/MS
MSDHGDVSLPPQDR	________________	VSLPPQDRVRILSQLG	-	M	S	D	R	V	0	1	0	3	0	1	0	1	1	0	1	0	1	0	2	2	0	0	0	1	0	0	14	0	1552.69	Q3TGB1;Q9CQ26	Q3TGB1	1	14	Stambp	STAM-binding protein	yes	no	2	0.006627	65.495			By matching
NEGTATYAAAVLFR	LMELLHSRNEGTATYA	YAAAVLFRISEDKNPD	R	N	E	F	R	I	4	1	1	0	0	0	1	1	0	0	1	0	0	1	0	0	2	0	1	1	0	0	14	0	1482.75	Q02257	Q02257	638	651	Jup	Junction plakoglobin	yes	yes	2;3	4.3589e-07	124.07			By MS/MS
NIIHGSDSVESAEK	DFCIQVGRNIIHGSDS	DSVESAEKEIHLWFKP	R	N	I	E	K	E	1	0	1	1	0	0	2	1	1	2	0	1	0	0	0	3	0	0	0	1	0	0	14	0	1484.71	Q5NC82;E9PZF0;Q01768;B0LAA8	Q5NC82	115	128	Nme2;Gm20390	Nucleoside diphosphate kinase;Nucleoside diphosphate kinase B	yes	no	2;3	8.1867e-21	180.7
NLDIERPTYTNLNR	AIYDICRRNLDIERPT	PTYTNLNRLISQIVSS	R	N	L	N	R	L	0	2	3	1	0	0	1	0	0	1	2	0	0	0	1	0	2	0	1	0	0	0	14	1	1717.87	P05213;Q99KA2;P68369;Q52L87;Q3TIZ0;P68373;Q5FW91;P05214;Q9D9Y2;Q9JJZ2;A0A0A0MQA5;P68368	P05213	216	229	Tuba1b;Tuba1a;Tuba1c;Tuba3a;Tuba8;Tuba4a	Tubulin alpha-1B chain;Tubulin alpha-1A chain;Tubulin alpha-1C chain;Tubulin alpha-3 chain;Tubulin alpha-8 chain;Tubulin alpha-4A chain	no	no	3	4.2733e-09	173.25			By MS/MS		By matching
NLEPEWAAAATEVK	APWCGHCKNLEPEWAA	AAAATEVKEQTKGKVK	K	N	L	V	K	E	4	0	1	0	0	0	3	0	0	0	1	1	0	0	1	0	1	1	0	1	0	0	14	0	1527.76	Q3THH1;Q922R8;Q3TML0;Q3TJL8;Q9DAB4	Q3THH1	200	213	Pdia6	Protein disulfide-isomerase A6	yes	no	2	1.4729e-05	109.83			By MS/MS		By MS/MS
NLLHVTDTGVGMTR	KIKCDKEKNLLHVTDT	DTGVGMTREELVKNLG	K	N	L	T	R	E	0	1	1	1	0	0	0	2	1	0	2	0	1	0	0	0	3	0	0	2	0	0	14	0	1512.77	Q91V38;Q3UAD6;P08113;Q3UBU0;Q8C2R2	Q91V38	143	156	Hsp90b1	Endoplasmin	yes	no	2;3	0.00087663	86.944
NLQIPPEDLIEMLK	YQLIEISRNLQIPPED	EDLIEMLKAGEKPNGL	R	N	L	L	K	A	0	0	1	1	0	1	2	0	0	2	3	1	1	0	2	0	0	0	0	0	0	0	14	0	1651.89	Q03517;Q4W8U9	Q03517	359	372	Scg2	Secretogranin-2;Secretoneurin;Manserin	yes	no	2	0.001289	75.764	By matching				By MS/MS
NPDGSEAPWCFTSR	DLRENFCRNPDGSEAP	APWCFTSRPGLRMAFC	R	N	P	S	R	P	1	1	1	1	1	0	1	1	0	0	0	0	0	1	2	2	1	1	0	0	0	0	14	0	1622.68	E0CXN0;Q91XG8;Q3UZ05;P26928	E0CXN0	334	347	Mst1	Hepatocyte growth factor-like protein;Hepatocyte growth factor-like protein alpha chain;Hepatocyte growth factor-like protein beta chain	yes	no	2	4.7387e-09	164.93		By MS/MS			By MS/MS
NSIAYLDEAAGNLK	QNITYHCKNSIAYLDE	DEAAGNLKKALLIQGS	K	N	S	L	K	K	3	0	2	1	0	0	1	1	0	1	2	1	0	0	0	1	0	0	1	0	0	0	14	0	1477.74	P28481-2;P28481-7;P28481-6;P28481-5;P28481-4;P28481-1;P28481	P28481-2	1298	1311	Col2a1	Collagen alpha-1(II) chain;Collagen alpha-1(II) chain;Chondrocalcin	yes	no	2	1.4603e-08	168.76
NSSYFVEWIPNNVK	QMLNVQNKNSSYFVEW	EWIPNNVKTAVCDIPP	K	N	S	V	K	T	0	0	3	0	0	0	1	0	0	1	0	1	0	1	1	2	0	1	1	2	0	0	14	0	1695.83	B2RSN3;Q9CWF2;Q7TMM9;Q99J49;P68372;Q9D6F9;Q9DCR1;Q9CRT0;Q3U9U3;Q3UMM1;Q922F4;Q9CUN8;P99024;Q80ZV2	P68372	337	350	Tubb2b;Tubb2a;Tubb4b;Tubb4a;Tubb3;Tubb6;Tubb5	Tubulin beta-2B chain;Tubulin beta-2A chain;Tubulin beta-4B chain;Tubulin beta-4A chain;Tubulin beta-6 chain;Tubulin beta-5 chain	no	no	2	1.9637e-07	155.09		By matching	By matching		By MS/MS
NSVAYMDQQTGNLK	QNITYHCKNSVAYMDQ	DQQTGNLKKALLLQGS	K	N	S	L	K	K	1	0	2	1	0	2	0	1	0	0	1	1	1	0	0	1	1	0	1	1	0	0	14	0	1567.73	Q99LL6;P11087-2;P11087;Q60785;CON__Q862S4	Q99LL6	497	510	Col1a1	Collagen alpha-1(I) chain	yes	no	2	4.1599e-33	219.35
NVTELNEPLSNEER	DDMAAAMKNVTELNEP	EPLSNEERNLLSVAYK	K	N	V	E	R	N	0	1	3	0	0	0	4	0	0	0	2	0	0	0	1	1	1	0	0	1	0	0	14	0	1642.78	A8IP69;P61982	A8IP69	29	42	Ywhag	14-3-3 protein gamma;14-3-3 protein gamma, N-terminally processed	yes	no	2	1.7383e-16	208.23
QIDFWKPDSATQVK	IQELANTKQIDFWKPD	PDSATQVKPLTTVDFH	K	Q	I	V	K	P	1	0	0	2	0	2	0	0	0	1	0	2	0	1	1	1	1	1	0	1	0	0	14	1	1661.84	B2RS76	B2RS76	47	60	Cpb1		yes	yes	3	0.040674	44.44	By matching		By MS/MS
QLEQLEVKRSGLTK	RELERSHRQLEQLEVK	VKRSGLTKELVEVREA	R	Q	L	T	K	E	0	1	0	0	0	2	2	1	0	0	3	2	0	0	0	1	1	0	0	1	0	0	14	2	1627.93	Q8CJ40-2;Q8CJ40-3;Q8CJ40	Q8CJ40-2	504	517	Crocc	Rootletin	yes	no	2	0.00014655	97.69			By matching
QLETIDQLHLEYAK	EALEKTEKQLETIDQL	QLHLEYAKRAAPFNNW	K	Q	L	A	K	R	1	0	0	1	0	2	2	0	1	1	3	1	0	0	0	0	1	0	1	0	0	0	14	0	1699.88	Q1A602;Q3ULT2;Q3UDJ7;P57780	Q1A602	522	535	Actn4	Alpha-actinin-4	yes	no	3	0.032893	46.282					By MS/MS
QMEQISQFLQAAER	QASSMAFKQMEQISQF	QFLQAAERYGINTTDI	K	Q	M	E	R	Y	2	1	0	0	0	4	2	0	0	1	1	0	1	1	0	1	0	0	0	0	0	0	14	0	1677.81	Q9WVA4	Q9WVA4	89	102	Tagln2	Transgelin-2	yes	yes	2	2.5518e-28	215.87		By MS/MS		By MS/MS	By MS/MS
SDIDEIVLVGGSTR	LEDSDLKKSDIDEIVL	VLVGGSTRIPKIQQLV	K	S	D	T	R	I	0	1	0	2	0	0	1	2	0	2	1	0	0	0	0	2	1	0	0	2	0	0	14	0	1459.75	Q3U9G2;Q3TWF2;P20029;Q9DC41;Q3TKF8;Q3TI47;Q3U7T8;Q3U6V3;Q3UEM8;Q3TUS2	Q3U9G2	355	368	Hspa5	78 kDa glucose-regulated protein	yes	no	2;3	1.8239e-08	165.64			By MS/MS		By matching
SFYPEEVSSMVLTK	VEYKGETKSFYPEEVS	VSSMVLTKMKEIAEAY	K	S	F	T	K	M	0	0	0	0	0	0	2	0	0	0	1	1	1	1	1	3	1	0	1	2	0	0	14	0	1615.78	Q3UBA6;Q3TZJ3;Q3TH56;Q3TEK2;P63017;Q504P4;Q3U9L2;Q3TF16;Q3TQ13;Q3UDS0;Q3ULM1;Q3TRH3;Q3TB63;Q3KQJ4	Q3UBA6	113	126	Hspa8	Heat shock cognate 71 kDa protein	yes	no	2	1.4729e-05	109.83			By matching	By matching	By matching
SGGMSNELNNIISR	GSVAYVSRSGGMSNEL	ELNNIISRTTDGVYEG	R	S	G	S	R	T	0	1	3	0	0	0	1	2	0	2	1	0	1	0	0	3	0	0	0	0	0	0	14	0	1490.71	Q3TED3;Q3V117;Q91V92;Q3UEA1;Q8VDM8	Q3TED3	653	666	Acly	ATP-citrate synthase	yes	no	2	1.411e-07	137.8					By MS/MS
SQIHDIVLVGGSTR	LRDAKLDKSQIHDIVL	VLVGGSTRIPKIQKLL	K	S	Q	T	R	I	0	1	0	1	0	1	0	2	1	2	1	0	0	0	0	2	1	0	0	2	0	0	14	0	1480.8	Q3UBA6;Q3TZJ3;Q3TH56;Q3TEK2;P63017;Q504P4;Q3U9L2;Q3TF16;Q3TQ13;Q3UDS0;Q3ULM1;Q3TRH3;Q3TB63;Q3KQJ4;Q3TH04;Q3UXU1	Q3UBA6	329	342	Hspa8	Heat shock cognate 71 kDa protein	yes	no	2;3	1.5369e-05	109.48			By MS/MS		By matching
SSNAEPVQVLSIAR	VVLGEYDRSSNAEPVQ	VQVLSIARAITHPNWN	R	S	S	A	R	A	2	1	1	0	0	1	1	0	0	1	1	0	0	0	1	3	0	0	0	2	0	0	14	0	1469.78	Q9ER05;Q9D7P8;Q9D960	Q9ER05	93	106	Ctrl		yes	no	2	0.00034446	96.27
STSESTAALGCLVK	FPLAPCSRSTSESTAA	AALGCLVKDYFPEPVT	R	S	T	V	K	D	2	0	0	0	1	0	1	1	0	0	2	1	0	0	0	3	2	0	0	1	0	0	14	0	1422.7	A0A097PUG1;A0A097PUH2	A0A097PUG1	156	169			yes	no	2	6.5752e-07	117.93
SVTEQGAELSNEER	DDMAACMKSVTEQGAE	AELSNEERNLLSVAYK	K	S	V	E	R	N	1	1	1	0	0	1	4	1	0	0	1	0	0	0	0	2	1	0	0	1	0	0	14	0	1547.71	P63101;D3YXN6;Q8BWN0;D3YXF4	P63101	28	41	Ywhaz	14-3-3 protein zeta/delta	yes	no	2	5.9492e-40	255.85	By MS/MS		By MS/MS		By MS/MS
SYTITGLQPGTDYK	RSISPDVRSYTITGLQ	LQPGTDYKIHLYTLND	R	S	Y	Y	K	I	0	0	0	1	0	1	0	2	0	1	1	1	0	0	1	1	3	0	2	0	0	0	14	0	1542.76	B7ZNJ1;Q3UH17;A0A087WS56;B9EHT6;A0A087WSN6;Q3UHL6;Q3UGY5;A0A087WR50;P11276;Q3TBB4;Q3TCF1;Q3UHR1;Q8R3F3;Q3UZF9;A0A087WS99	B7ZNJ1	1776	1789	Fn1	Fibronectin;Anastellin	yes	no	2	1.2235e-08	170.79		By matching		By MS/MS	By MS/MS
TASNVEEAFINTAK	IFMETSAKTASNVEEA	EAFINTAKEIYEKIQE	K	T	A	A	K	E	3	0	2	0	0	0	2	0	0	1	0	1	0	1	0	1	2	0	0	1	0	0	14	0	1493.74	Q0PD65;P53994;Q8BXY4	Q0PD65	152	165	Rab2a	Ras-related protein Rab-2A	yes	no	2	0.032999	57.788
TFAPEEISAMVLTK	DIGGGQTKTFAPEEIS	ISAMVLTKMKETAEAY	K	T	F	T	K	M	2	0	0	0	0	0	2	0	0	1	1	1	1	1	1	1	2	0	0	1	0	0	14	0	1535.79	Q3U9G2;Q3TWF2;P20029;Q9DC41;Q3TKF8;Q3TI47;Q3U7T8;Q3U6V3;Q3UEM8	Q3U9G2	140	153	Hspa5	78 kDa glucose-regulated protein	yes	no	2;3	1.4729e-05	109.83	By MS/MS	By matching	By MS/MS		By matching
TGEAIVDAALSALR	PEDYQGGRTGEAIVDA	DAALSALRQLVKDRLG	R	T	G	L	R	Q	4	1	0	1	0	0	1	1	0	1	2	0	0	0	0	1	1	0	0	1	0	0	14	0	1385.75	Q3THH1;Q922R8;Q3TML0;Q3TJL8;Q9DAB4	Q3THH1	124	137	Pdia6	Protein disulfide-isomerase A6	yes	no	2;3	1.9709e-11	183.96	By matching	By matching	By MS/MS	By matching	By MS/MS
TGENVEDAFLEAAK	LFLEASAKTGENVEDA	DAFLEAAKKIYQNIQD	K	T	G	A	K	K	3	0	1	1	0	0	3	1	0	0	1	1	0	1	0	0	1	0	0	1	0	0	14	0	1492.7	Q50HX3;Q50HX1;Q50HW9;Q50HX4;Q50HX2;Q50HX0;Q91V41	Q50HX3	139	152	Rab14	Ras-related protein Rab-14	yes	no	2	0.0029795	81.632
TIGVSNFNPLQIER	LVDEGLVKTIGVSNFN	FNPLQIERILNKPGLK	K	T	I	E	R	I	0	1	2	0	0	1	1	1	0	2	1	0	0	1	1	1	1	0	0	1	0	0	14	0	1586.84	Q3TCL2;Q5U415;Q3UDY1;P45376	Q3TCL2	156	169	Akr1b3;Akr1b1	Aldose reductase	yes	no	2	0.00059887	91.812			By matching
TLAESALQLLYTAK	MALLDQTKTLAESALQ	LQLLYTAKEAGGNPKQ	K	T	L	A	K	E	3	0	0	0	0	1	1	0	0	0	4	1	0	0	0	1	2	0	1	0	0	0	14	0	1520.85	Q3UHS6;Q80TM2;P26039;Q3TBC3;Q0V930	Q3UHS6	1767	1780	Tln1	Talin-1	yes	no	2	1.2461e-07	144.16		By MS/MS		By MS/MS	By MS/MS
TMLESAGGLIQTAR	EPIVISAKTMLESAGG	GGLIQTARALAVNPRD	K	T	M	A	R	A	2	1	0	0	0	1	1	2	0	1	2	0	1	0	0	1	2	0	0	0	0	0	14	0	1446.75	Q3UHS6;Q80TM2;P26039;Q3TBC3;Q0V930	Q3UHS6	1605	1618	Tln1	Talin-1	yes	no	2	1.7273e-07	150.11				By matching	By MS/MS
TSGPFFFCIFIIGK	________________	FCIFIIGKYFTLGSAQ	M	T	S	G	K	Y	0	0	0	0	1	0	0	2	0	3	0	1	0	4	1	1	1	0	0	0	0	0	14	0	1632.84	S4R2B5;Q6R6I7	S4R2B5	2	15	Rxfp1	Relaxin receptor 1	yes	no	2	0.0032762	74.392	By MS/MS	By matching	By matching	By matching	By MS/MS
VACITEQVLTLVNK	PAAEARMKVACITEQV	QVLTLVNKRLGLYRHF	K	V	A	N	K	R	1	0	1	0	1	1	1	0	0	1	2	1	0	0	0	0	2	0	0	3	0	0	14	0	1586.87	Q5RKP4;Q8BMR3;Q3U900;Q91YQ5;Q99LY0	Q5RKP4	475	488	Rpn1	Dolichyl-diphosphooligosaccharide--protein glycosyltransferase subunit 1	yes	no	2	0.0072596	72.681			By matching
VDQLTAQLADLAAR	DLLAKCDRVDQLTAQL	QLADLAARGEGESPQA	R	V	D	A	R	G	4	1	0	2	0	2	0	0	0	0	3	0	0	0	0	0	1	0	0	1	0	0	14	0	1483.8	Q64727	Q64727	548	561	Vcl	Vinculin	yes	yes	2	2.2191e-07	143.81	By matching
VFSVAITPDHLEPR	EAKHLGIKVFSVAITP	TPDHLEPRLSIIATDH	K	V	F	P	R	L	1	1	0	1	0	0	1	0	1	1	1	0	0	1	2	1	1	0	0	2	0	0	14	0	1579.84	Q04857;Q8C6Y0	Q04857	185	198	Col6a1	Collagen alpha-1(VI) chain	yes	no	3	1.9792e-07	122.64		By MS/MS		By MS/MS	By MS/MS
VIKDFMIQGGDFTR	YKNSKFHRVIKDFMIQ	IQGGDFTRGDGTGGKS	R	V	I	T	R	G	0	1	0	2	0	1	0	2	0	2	0	1	1	2	0	0	1	0	0	1	0	0	14	1	1625.82	Q9DCY1;P24369;Q6ZQM2	Q9DCY1	96	109	Ppib	Peptidyl-prolyl cis-trans isomerase;Peptidyl-prolyl cis-trans isomerase B	yes	no	3	0.0062475	59.728		By MS/MS
VLEQLTGQTPVFSK	DRLTRAAKVLEQLTGQ	GQTPVFSKARYTVRSF	K	V	L	S	K	A	0	0	0	0	0	2	1	1	0	0	2	1	0	1	1	1	2	0	0	2	0	0	14	0	1545.84	Q8VC94;A2BH06;E9PZB3;E9PYL9;Q9CXW4	Q8VC94	28	41	Rpl11;Gm5093;Gm10036	60S ribosomal protein L11	yes	no	2	2.6626e-07	128.76			By MS/MS
VLEYLNQEQAEQGR	LDEDMLLKVLEYLNQE	QEQAEQGREHLAKRAM	K	V	L	G	R	E	1	1	1	0	0	3	3	1	0	0	2	0	0	0	0	0	0	0	1	1	0	0	14	0	1675.82	Q03517;Q4W8U9	Q03517	593	606	Scg2	Secretogranin-2;Secretoneurin;Manserin	yes	no	2	7.4282e-12	192.18			By MS/MS
VLQATVVAVGSGGK	LPEKSQGKVLQATVVA	VAVGSGGKGKSGEIEP	K	V	L	G	K	G	2	0	0	0	0	1	0	3	0	0	1	1	0	0	0	1	1	0	0	4	0	0	14	0	1284.74	Q4KL76;Q64433;Q9JI95	Q4KL76	41	54	Hspe1;Cpn10-rs1	10 kDa heat shock protein, mitochondrial	yes	no	2	1.7367e-06	93.478
VPTPNVSVVDLTCR	KLTGMAFRVPTPNVSV	SVVDLTCRLEKPAKYD	R	V	P	C	R	L	0	1	1	1	1	0	0	0	0	0	1	0	0	0	2	1	2	0	0	4	0	0	14	0	1555.8	S4R257;D2KHZ9;A0A0A0MQF6;P16858;S4R1W1;Q3TUZ9;Q3V2I5;A0A0R4J0X7;S4R2G5;Q64467	S4R257	190	203	Gapdh;GAPDH;Gm3839;Gm10481;Gapdhs	Glyceraldehyde-3-phosphate dehydrogenase;Glyceraldehyde-3-phosphate dehydrogenase, testis-specific	yes	no	2	1.3809e-16	209.22		By MS/MS		By MS/MS	By MS/MS
VPWASKTNKFNQAK	LSKLRSTRVPWASKTN	TNKFNQAKSE______	R	V	P	A	K	S	2	0	2	0	0	1	0	0	0	0	0	3	0	1	1	1	1	1	0	1	0	0	14	2	1617.86	A0A140LJ62;Q6GQT2;Q9JJR9	A0A140LJ62	74	87	Nrip3	Nuclear receptor-interacting protein 3	yes	no	2	0.0042893	61.235
VSNYIDWINSVMAR	RKPSVFTRVSNYIDWI	WINSVMARN_______	R	V	S	A	R	N	1	1	2	1	0	0	0	0	0	2	0	0	1	0	0	2	0	1	1	2	0	0	14	0	1666.81	P05208	P05208	257	270	Cela2a	Chymotrypsin-like elastase family member 2A	yes	yes	2;3	0.0028378	73.245	By matching	By MS/MS			By matching
VTPVAAVQDGFTNR	QDGKIPEKVTPVAAVQ	VQDGFTNRENDETVSN	K	V	T	N	R	E	2	1	1	1	0	1	0	1	0	0	0	0	0	1	1	0	2	0	0	3	0	0	14	0	1473.76	P47867;P47867-2	P47867	233	246	Scg3	Secretogranin-3	yes	no	3	0.013362	59.864			By MS/MS
WLLNEFPVFITMDK	FPDDLSYRWLLNEFPV	PVFITMDKRRFVSQTN	R	W	L	D	K	R	0	0	1	1	0	0	1	0	0	1	2	1	1	2	1	0	1	1	0	1	0	0	14	0	1751.9	P12960	P12960	172	185	Cntn1	Contactin-1	yes	yes	2	0.00019196	98.943	By matching	By MS/MS		By MS/MS	By matching
YYTSASGDEMVSLK	KKLSELLRYYTSASGD	GDEMVSLKDYCTRMKE	R	Y	Y	L	K	D	1	0	0	1	0	0	1	1	0	0	1	1	1	0	0	3	1	0	2	1	0	0	14	0	1549.7	Q80Y52;Q3UIF3;Q3TKA2;P07901;Q3TJU7;A0PJ91;Q3TKB9;Q8C5U3;Q3TKG0	Q80Y52	466	479	Hsp90aa1	Heat shock protein HSP 90-alpha	yes	no	2	0.037149	58.723
AGAESDGQFQFTGIK	________________	QFQFTGIKKYFNSYTL	M	A	G	I	K	K	2	0	0	1	0	2	1	3	0	1	0	1	0	2	0	1	1	0	0	0	0	0	15	0	1554.73	Q78IK2	Q78IK2	2	16	Usmg5	Up-regulated during skeletal muscle growth protein 5	yes	yes	2	0.0009852	85.006			By matching
AHFNLDESGVLSLDR	DYESKGIKAHFNLDES	SGVLSLDRVESVFETL	K	A	H	D	R	V	1	1	1	2	0	0	1	1	1	0	3	0	0	1	0	2	0	0	0	1	0	0	15	0	1671.82	Q9JKR6	Q9JKR6	541	555	Hyou1	Hypoxia up-regulated protein 1	yes	yes	3	8.0168e-06	112.17
AILVDLEPGTMDSVR	TGGKYVPRAILVDLEP	PGTMDSVRSGPFGQIF	R	A	I	V	R	S	1	1	0	2	0	0	1	1	0	1	2	0	1	0	1	1	1	0	0	2	0	0	15	0	1614.83	B2RSN3;Q9CWF2;Q7TMM9;P99024	P99024	63	77	Tubb2b;Tubb2a;Tubb5	Tubulin beta-2B chain;Tubulin beta-2A chain;Tubulin beta-5 chain	no	no	2	3.5317e-05	104.95			By MS/MS		By MS/MS
AKEFLVSKNDEMVQR	LSCEFQEKAKEFLVSK	KNDEMVQRHALWTLLC	K	A	K	Q	R	H	1	1	1	1	0	1	2	0	0	0	1	2	1	1	0	1	0	0	0	2	0	0	15	2	1792.91	G3UXR9;G8JL47;B1AUR6-2;B1AUR6	G3UXR9	331	345	Mms22l	Protein MMS22-like	yes	no	3	0.023197	48.405	By matching		By MS/MS
ALEQFLQEYFDGNLK	EEFSRDGKALEQFLQE	EYFDGNLKRYLKSEPI	K	A	L	L	K	R	1	0	1	1	0	2	2	1	0	0	3	1	0	2	0	0	0	0	1	0	0	0	15	0	1813.89	P27773	P27773	348	362	Pdia3	Protein disulfide-isomerase A3	yes	yes	2;3	1.8773e-06	142.45					By MS/MS
ALTVPELTQQMFDAK	SRGSQQYRALTVPELT	TQQMFDAKNMMAACDP	R	A	L	A	K	N	2	0	0	1	0	2	1	0	0	0	2	1	1	1	1	0	2	0	0	1	0	0	15	0	1690.86	P68372;Q9D6F9;Q9CVR0;Q9DCR1;Q9CRT0;Q3U9U3;Q3UMM1;Q922F4;Q9CUN8	P68372	283	297	Tubb4b;Tubb4a;Tubb3;Tubb6	Tubulin beta-4B chain;Tubulin beta-4A chain;Tubulin beta-6 chain	no	no	2	5.2275e-06	124.62			By matching		By MS/MS
ALTVPELTQQMFDSK	SRGSQQYRALTVPELT	TQQMFDSKNMMAACDP	R	A	L	S	K	N	1	0	0	1	0	2	1	0	0	0	2	1	1	1	1	1	2	0	0	1	0	0	15	0	1706.85	B2RSN3;Q9CWF2;Q7TMM9;Q99J49	B2RSN3	283	297	Tubb2b;Tubb2a	Tubulin beta-2B chain;Tubulin beta-2A chain	yes	no	2	4.071e-06	142.45
ALTVPELTQQVFDAK	SRGSQQYRALTVPELT	TQQVFDAKNMMAACDP	R	A	L	A	K	N	2	0	0	1	0	2	1	0	0	0	2	1	0	1	1	0	2	0	0	2	0	0	15	0	1658.89	P99024;Q80ZV2	P99024	283	297	Tubb5	Tubulin beta-5 chain	yes	no	2	0.00037643	93.478				By matching
AMGIMNSFVNDIFER	PDTGISSKAMGIMNSF	FVNDIFERIASEASRL	K	A	M	E	R	I	1	1	2	1	0	0	1	1	0	2	0	0	2	2	0	1	0	0	0	1	0	0	15	0	1742.81	A0JLV3;B2RVD5;B2RTK3;Q8CBB6;Q921L4;Q8CGP2;Q8CGP1;Q6ZWY9;Q64525;Q64478;Q64475;P10854;P10853;Q8CGP2-2;Q9D2U9;Q8CGP0;Q64524;Q8VEE3;G3X9D5	A0JLV3	56	70	Hist1h2bj;Hist1h2bk;Hist1h2bm;Hist1h2br;LOC665622;Hist1h2bp;Hist1h2bc;Hist2h2bb;Hist1h2bh;Hist1h2bb;Hist1h2bf;Hist3h2ba;Hist3h2bb;Hist2h2be	Histone H2B;Histone H2B type 1-P;Histone H2B type 1-K;Histone H2B type 1-C/E/G;Histone H2B type 2-B;Histone H2B type 1-H;Histone H2B type 1-B;Histone H2B type 1-M;Histone H2B type 1-F/J/L;Histone H2B type 3-A;Histone H2B type 3-B;Histone H2B type 2-E	yes	no	2	5.7638e-08	178.67	By MS/MS	By matching		By MS/MS	By MS/MS
ASAELALGENNEVLK	GGLAEFCKASAELALG	GENNEVLKSGRFVTVQ	K	A	S	L	K	S	3	0	2	0	0	0	3	1	0	0	3	1	0	0	0	1	0	0	0	1	0	0	15	0	1556.8	P05202	P05202	108	122	Got2	Aspartate aminotransferase, mitochondrial	yes	yes	2	7.1834e-06	119.45			By MS/MS
ASQSQGIQQLLQAEK	________________	QQLLQAEKRAAEKVSE	M	A	S	E	K	R	2	0	0	0	0	5	1	1	0	1	2	1	0	0	0	2	0	0	0	0	0	0	15	0	1627.85	Q5HZY7;Q3U7E0;Q9CR51	Q5HZY7	2	16	Atp6v1g1	V-type proton ATPase subunit G 1	yes	no	2	0.00011467	97.235
AVFVDLEPTVIDEIR	GAGKHVPRAVFVDLEP	PTVIDEIRNGPYRQLF	R	A	V	I	R	N	1	1	0	2	0	0	2	0	0	2	1	0	0	1	1	0	1	0	0	3	0	0	15	0	1714.91	A0A0A0MQA5;P68368;A0A087WRB4;A0A087WQS4;A0A087WSB0;A0A087WSL5	A0A0A0MQA5	94	108	Tuba4a	Tubulin alpha-4A chain	yes	no	2;3	2.9983e-06	148.57	By MS/MS	By MS/MS		By MS/MS	By MS/MS
AVFVDLEPTVIDEVR	GAGKHVPRAVFVDLEP	PTVIDEVRTGTYRQLF	R	A	V	V	R	T	1	1	0	2	0	0	2	0	0	1	1	0	0	1	1	0	1	0	0	4	0	0	15	0	1700.9	P05213;O89052;P68369;Q52L87;Q3TIZ0;P68373	P05213	65	79	Tuba1b;Tuba1a;Tuba1c	Tubulin alpha-1B chain;Tubulin alpha-1A chain;Tubulin alpha-1C chain	no	no	2;3	2.7439e-20	156.24	By MS/MS	By MS/MS	By MS/MS	By MS/MS	By MS/MS
AVLVDLEPGTMDSVR	TGGKYVPRAVLVDLEP	PGTMDSVRSGPFGQIF	R	A	V	V	R	S	1	1	0	2	0	0	1	1	0	0	2	0	1	0	1	1	1	0	0	3	0	0	15	0	1600.81	P68372;Q9D6F9;Q9CVR0	P68372	63	77	Tubb4b;Tubb4a	Tubulin beta-4B chain;Tubulin beta-4A chain	yes	no	2	5.0018e-06	125.22	By MS/MS		By matching
CIKDEETGLCLLPLK	TYLQLKERCIKDEETG	GLCLLPLKEKKKQVQT	R	C	I	L	K	E	0	0	0	1	2	0	2	1	0	1	4	2	0	0	1	0	1	0	0	0	0	0	15	1	1787.92	E9Q557;E9PZW0;Q8BP77	E9Q557	2445	2459	Dsp	Desmoplakin	yes	no	3	1.7917e-05	103.13			By MS/MS
CNGEIDNYNDAYQVR	AWDFNDNKCNGEIDNY	YNDAYQVRNCRLTGLL	K	C	N	V	R	N	1	1	3	2	1	1	1	1	0	1	0	0	0	0	0	0	0	0	2	1	0	0	15	0	1829.76	Q8C5B4;E9PV85;P00688	P00688	156	170	Amy2a1;Amy2	Alpha-amylase;Pancreatic alpha-amylase	no	no	2;3	1.4164e-38	255.45	By MS/MS		By MS/MS
CVEEFQSLTSCLDFK	RSPHPPEKCVEEFQSL	LTSCLDFKAFLVTPRN	K	C	V	F	K	A	0	0	0	1	2	1	2	0	0	0	2	1	0	2	0	2	1	0	0	1	0	0	15	0	1861.82	Q9Z1R3	Q9Z1R3	159	173	Apom	Apolipoprotein M	yes	yes	2;3	1.6268e-14	180.11	By matching	By MS/MS		By MS/MS	By MS/MS
DAVITVPAFFNQAER	DFAEQPIKDAVITVPA	AFFNQAERRAVLQAAR	K	D	A	E	R	R	3	1	1	1	0	1	1	0	0	1	0	0	0	2	1	0	1	0	0	2	0	0	15	0	1676.85	Q9JKR6;Q8VCI2;F6TRP3	Q9JKR6	171	185	Hyou1	Hypoxia up-regulated protein 1	yes	no	2	0.0004878	90.707
DDGQSDSQAVDGDGK	AGYKAIQKDDGQSDSQ	QAVDGDGKTEASEALP	K	D	D	G	K	T	1	0	0	5	0	2	0	3	0	0	0	1	0	0	0	2	0	0	0	1	0	0	15	0	1492.59	P26339;Q3UN28	P26339	276	290	Chga	Chromogranin-A;Pancreastatin;Beta-granin;WE-14;Catestatin;GE-25;Serpinin-RRG;Serpinin;p-Glu serpinin precursor	yes	no	2	2.0307e-07	172.09	By MS/MS	By matching	By MS/MS	By matching	By MS/MS
DDNSVELTVAEGPYK	ARLSVSGRDDNSVELT	TVAEGPYKIILTAQPF	R	D	D	Y	K	I	1	0	1	2	0	0	2	1	0	0	1	1	0	0	1	1	1	0	1	2	0	0	15	0	1635.76	Q3UE86;A1A4T2;Q8BHN3;Q8BHN3-2	Q3UE86	134	148	Ganab	Neutral alpha-glucosidase AB	yes	no	2	0.0032486	78.326
DDTESLEIFQNEVAR	FLILFHMKDDTESLEI	IFQNEVARQLISEKGT	K	D	D	A	R	Q	1	1	1	2	0	1	3	0	0	1	1	0	0	1	0	1	1	0	0	1	0	0	15	0	1764.82	Q3URM4;Q9D1Q6	Q3URM4	271	285	Erp44	Endoplasmic reticulum resident protein 44	yes	no	2	0.0050875	72.898
DIVPGDIVEIAVGDK	SVQRIKAKDIVPGDIV	VEIAVGDKVPADIRLT	K	D	I	D	K	V	1	0	0	3	0	0	1	2	0	3	0	1	0	0	1	0	0	0	0	3	0	0	15	0	1538.82	O54994;J3KMM5;Q5DTI2;O55143-2;O55143	O54994	39	53	Atp2a2	Calcium-transporting ATPase;Sarcoplasmic/endoplasmic reticulum calcium ATPase 2	yes	no	2	0.00035912	93.909
DKGFFGFLLPESQIR	YSFTFELRDKGFFGFL	LLPESQIRQTCEETML	R	D	K	I	R	Q	0	1	0	1	0	1	1	2	0	1	2	1	0	3	1	1	0	0	0	0	0	0	15	1	1752.92	B2RS76	B2RS76	379	393	Cpb1		yes	yes	3	0.016462	53.308		By MS/MS
DVTFSPATIEEELIK	FYQDLKDRDVTFSPAT	TIEEELIKFCREARGK	R	D	V	I	K	F	1	0	0	1	0	0	3	0	0	2	1	1	0	1	1	1	2	0	0	1	0	0	15	0	1690.87	Q80ZP8;A8C1V1;Q3TMX5;F6USD5;F6T4L3;Q9CXI5	Q80ZP8	31	45	Manf	Mesencephalic astrocyte-derived neurotrophic factor	yes	no	2	3.7645e-05	103.88					By MS/MS
EANNYEETLDKPTSR	ALQKLISKEANNYEET	TLDKPTSRTENQDGKI	K	E	A	S	R	T	1	1	2	1	0	0	3	0	0	0	1	1	0	0	1	1	2	0	1	0	0	0	15	1	1765.81	P47867;P47867-2	P47867	207	221	Scg3	Secretogranin-3	yes	no	2;3	1.8489e-06	160.81			By MS/MS
EDAGAPVEDSQGQTK	GTRWASSREDAGAPVE	EDSQGQTKVGNEKWTE	R	E	D	T	K	V	2	0	0	2	0	2	2	2	0	0	0	1	0	0	1	1	1	0	0	1	0	0	15	0	1530.68	Q3UZU8;Q3TY66;P16014;Q8BP91;Q3UZP2;Q9CTW1	Q3UZU8	102	116	Chgb	Secretogranin-1;CCB peptide;PE-11	yes	no	2	2.2529e-08	132.65	By MS/MS		By MS/MS		By MS/MS
EDQVIQLMNTIFSKK	VGTEPSMKEDQVIQLM	MNTIFSKKNFESLSEA	K	E	D	K	K	N	0	0	1	1	0	2	1	0	0	2	1	2	1	1	0	1	1	0	0	1	0	0	15	1	1792.94	Q61833;A2ACG7;Q3U505;Q9DBG6	Q61833	220	234	Rpn2	Dolichyl-diphosphooligosaccharide--protein glycosyltransferase subunit 2	yes	no	3	0.030788	46.797		By MS/MS			By matching
EIHLWFKPEELIDYK	DSVESAEKEIHLWFKP	PEELIDYKSCAHDWVY	K	E	I	Y	K	S	0	0	0	1	0	0	3	0	1	2	2	2	0	1	1	0	0	1	1	0	0	0	15	1	1959.01	Q5NC82;E9PZF0;Q01768;B0LAA8	Q5NC82	129	143	Nme2;Gm20390	Nucleoside diphosphate kinase;Nucleoside diphosphate kinase B	yes	no	3;4	3.6984e-06	117.2					By MS/MS
ELETVCNDVLALLDK	AYREKIEKELETVCND	DVLALLDKFLIKNCND	K	E	L	D	K	F	1	0	1	2	1	0	2	0	0	0	4	1	0	0	0	0	1	0	0	2	0	0	15	0	1730.88	P68510	P68510	92	106	Ywhah	14-3-3 protein eta	yes	yes	2	0.00026516	96.247					By MS/MS
ELGATECINPQDYSK	KDKFAKAKELGATECI	INPQDYSKPIQEVLQE	K	E	L	S	K	P	1	0	1	1	1	1	2	1	0	1	1	1	0	0	1	1	1	0	1	0	0	0	15	0	1723.77	Q3UKA4;P00329	Q3UKA4	235	249	Adh1	Alcohol dehydrogenase 1	yes	no	2	4.029e-05	102.65
ETSGNLEQLLLAVVK	QIEETIDRETSGNLEQ	QLLLAVVKSIRSIPAY	R	E	T	V	K	S	1	0	1	0	0	1	2	1	0	0	4	1	0	0	0	1	1	0	0	2	0	0	15	0	1612.9	P48036	P48036	226	240	Anxa5	Annexin A5	yes	yes	2;3	2.3776e-07	137.8	By MS/MS				By MS/MS
EVEPALELLEPIDQK	VETAEPEKEVEPALEL	LLEPIDQKFVAISDLY	K	E	V	Q	K	F	1	0	0	1	0	1	4	0	0	1	3	1	0	0	2	0	0	0	0	1	0	0	15	0	1721.91	P50396;B7FAU8	P50396	365	379	Gdi1	Rab GDP dissociation inhibitor alpha	yes	no	2	0.00016754	98.676			By matching
EVGVYEALKDDSWLK	AKVKLQGKEVGVYEAL	LKDDSWLKGEFITTVQ	K	E	V	L	K	G	1	0	0	2	0	0	2	1	0	0	2	2	0	0	0	1	0	1	1	2	0	0	15	1	1750.88	P14152	P14152	206	220	Mdh1	Malate dehydrogenase, cytoplasmic	yes	yes	3	4.491e-05	100.4					By matching
FDEILEASDGIMVAR	ENHEGVRRFDEILEAS	SDGIMVARGDLGIEIP	R	F	D	A	R	G	2	1	0	2	0	0	2	1	0	2	1	0	1	1	0	1	0	0	0	1	0	0	15	0	1664.81	P52480;P52480-2	P52480	280	294	Pkm	Pyruvate kinase PKM	no	no	2	0.027671	58.079			By MS/MS
FITQWGEESSGSSPK	VQFSPSGKFITQWGEE	ESSGSSPKPGQFSVPH	K	F	I	P	K	P	0	0	0	0	0	1	2	2	0	1	0	1	0	1	1	4	1	1	0	0	0	0	15	0	1638.75	E9Q704;F8VQA4;P97467;Q3V1A8;F6TGI4	E9Q704	562	576	Pam	Peptidyl-glycine alpha-amidating monooxygenase;Peptidylglycine alpha-hydroxylating monooxygenase;Peptidyl-alpha-hydroxyglycine alpha-amidating lyase	yes	no	2	5.2451e-06	150.05	By matching		By MS/MS	By matching
FSNEEIAMATVTALR	PGHACTQKFSNEEIAM	MATVTALRRTVPPAVT	K	F	S	L	R	R	3	1	1	0	0	0	2	0	0	1	1	0	1	1	0	1	2	0	0	1	0	0	15	0	1651.82	Q5FWB7;A6ZI44;P05064;Q6NY00;Q9CPQ9;A6ZI46	Q5FWB7	244	258	Aldoa;Aldoart1	Fructose-bisphosphate aldolase;Fructose-bisphosphate aldolase A	yes	no	2;3	1.6695e-06	127.57			By matching		By matching
FSTVAGESGSADTVR	KRTPIAVRFSTVAGES	SGSADTVRDPRGFAVK	R	F	S	V	R	D	2	1	0	1	0	0	1	2	0	0	0	0	0	1	0	3	2	0	0	2	0	0	15	0	1482.7	Q91XI2;Q542K4;Q3TVZ1	Q91XI2	113	127	Cat	Catalase	yes	no	2	0.00061077	87.647			By MS/MS
GAAQNIIPASTGAAK	GKLWRDGRGAAQNIIP	PASTGAAKAVGKVIPE	R	G	A	A	K	A	5	0	1	0	0	1	0	2	0	2	0	1	0	0	1	1	1	0	0	0	0	0	15	0	1368.74	S4R257;D2KHZ9;A0A0A0MQF6;P16858;S4R1W1;Q3TUZ9;Q8CEV2	S4R257	156	170	Gapdh;GAPDH;Gm3839;Gm10481;3000002C10Rik	Glyceraldehyde-3-phosphate dehydrogenase	yes	no	2	4.4393e-06	126.71			By MS/MS	By matching
GAEEMETVIPVDVMR	RALVILAKGAEEMETV	VIPVDVMRRAGIKVTV	K	G	A	M	R	R	1	1	0	1	0	0	3	1	0	1	0	0	2	0	1	0	1	0	0	3	0	0	15	0	1674.8	A2A813;Q99LX0;A2A815;D3K2X3;A2A817;A2A816	A2A813	13	27	Park7;Dj1	Protein deglycase DJ-1	yes	no	2	3.0169e-06	153.09					By MS/MS
GFGFVTFDDHDPVDK	DRQSGKKRGFGFVTFD	DDHDPVDKIVLQKYHT	R	G	F	D	K	I	0	0	0	4	0	0	0	2	1	0	0	1	0	3	1	0	1	0	0	2	0	0	15	0	1694.76	A0A0N4SUM2;B7ZP22;O88569-3;O88569-2;O88569	A0A0N4SUM2	53	67	Hnrnpa2b1	Heterogeneous nuclear ribonucleoproteins A2/B1	yes	no	3	0.021893	49.325			By matching		By MS/MS
GFQSLLHTLDLPSPK	TPAADVHRGFQSLLHT	TLDLPSPKLELKLGHF	R	G	F	P	K	L	0	0	0	1	0	1	0	1	1	0	4	1	0	1	2	2	1	0	0	0	0	0	15	0	1651.89	D3Z0P3;H3BJV3;Q3UEP8;E9QK54;E9QLL8;Q8CIE0	D3Z0P3	128	142	Serpina11	Serpin A11	yes	no	2;3	9.6396e-15	197.15		By MS/MS		By MS/MS	By matching
GLEVTAYSPLGSSDR	LIAHCHARGLEVTAYS	SPLGSSDRAWRHPDEP	R	G	L	D	R	A	1	1	0	1	0	0	1	2	0	0	2	0	0	0	1	3	1	0	1	1	0	0	15	0	1550.76	Q80XJ7;Q540D7;Q3UJW9;Q9JII6	Q80XJ7	204	218	Akr1a1	Alcohol dehydrogenase [NADP(+)]	yes	no	2	0.023816	60.55
GLYDGPVCEVSVTPK	AELRGVPRGLYDGPVC	CEVSVTPKTVTPASSA	R	G	L	P	K	T	0	0	0	1	1	0	1	2	0	0	1	1	0	0	2	1	1	0	1	3	0	0	15	0	1619.79	O08553	O08553	497	511	Dpysl2	Dihydropyrimidinase-related protein 2	yes	yes	2	0.0039275	76.322					By MS/MS
GNPDDSFLEDEGEDR	KNSDFEKRGNPDDSFL	LEDEGEDRNGVTLTEK	R	G	N	D	R	N	0	1	1	4	0	0	3	2	0	0	1	0	0	1	1	1	0	0	0	0	0	0	15	0	1693.67	Q3UZU8;Q3TY66;P16014;Q8BP91	Q3UZU8	537	551	Chgb	Secretogranin-1;CCB peptide;PE-11	yes	no	2	0.011445	68.481			By MS/MS
GVGTLKSGLFSPGMR	________________	GLFSPGMRRSWALSRQ	M	G	V	M	R	R	0	1	0	0	0	0	0	4	0	0	2	1	1	1	1	2	1	0	0	1	0	0	15	1	1505.8	Q3V206	Q3V206	2	16	Ptrh1		yes	yes	2	0.0029187	77.894	By matching	By matching	By matching	By MS/MS	By MS/MS
HLDSVLQQLQTEVFR	SEMGPCRRHLDSVLQQ	QLQTEVFRGGARGLYV	R	H	L	F	R	G	0	1	0	1	0	3	1	0	1	0	3	0	0	1	0	1	1	0	0	2	0	0	15	0	1811.95	P47880	P47880	163	177	Igfbp6	Insulin-like growth factor-binding protein 6	yes	yes	2;3	6.5126e-28	214.23	By matching	By MS/MS		By MS/MS	By MS/MS
HLEINPDHSIIETLR	MGYMAAKKHLEINPDH	HSIIETLRQKAEADKN	K	H	L	L	R	Q	0	1	1	1	0	0	2	0	2	3	2	0	0	0	1	1	1	0	0	0	0	0	15	0	1785.94	Q80Y52;Q3UIF3;Q3TKA2;P07901;Q3TJU7	Q80Y52	634	648	Hsp90aa1	Heat shock protein HSP 90-alpha	yes	no	3	3.2393e-15	171.08		By MS/MS			By MS/MS
HSQFIGYPITLFVEK	RIKEIVKKHSQFIGYP	PITLFVEKERDKEVSD	K	H	S	E	K	E	0	0	0	0	0	1	1	1	1	2	1	1	0	2	1	1	1	0	1	1	0	0	15	0	1777.94	Q80Y52;Q3UIF3;Q3TKA2;P07901;Q3TJU7;A0PJ91;Q3TKB9;Q8C5U3;Q3TKG0;Q8C2A9	Q80Y52	210	224	Hsp90aa1	Heat shock protein HSP 90-alpha	yes	no	3	0.00053204	84.046					By MS/MS
IADISQVYTQNAEMR	PVDMLCKRIADISQVY	YTQNAEMRPLGCCMIL	R	I	A	M	R	P	2	1	1	1	0	2	1	0	0	2	0	0	1	0	0	1	1	0	1	1	0	0	15	0	1737.84	E0CXB1;Q9QUM9	E0CXB1	99	113	Psma6	Proteasome subunit alpha type-6	yes	no	2	4.029e-05	102.65
IDQYQGADAVGLEEK	LFFRNKVRIDQYQGAD	DAVGLEEKFKQHLEND	R	I	D	E	K	F	2	0	0	2	0	2	2	2	0	1	1	1	0	0	0	0	0	0	1	1	0	0	15	0	1634.78	Q3UBF4;Q3U8R9;Q3UNH3;Q8CDN6	Q3UBF4	88	102	Txnl1	Thioredoxin-like protein 1	yes	no	2	0.00042056	92.38
IEINFPAEYPFKPPK	PYDKGAFRIEINFPAE	EYPFKPPKITFKTKIY	R	I	E	P	K	I	1	0	1	0	0	0	2	0	0	2	0	2	0	2	4	0	0	0	1	0	0	0	15	1	1788.95	Q561N4;P68037;D3YZS3;Q3TIH9	Q561N4	53	67	Ube2l3	Ubiquitin-conjugating enzyme E2 L3	yes	no	3	0.014708	54.237
IGGHGAEYGAEALER	QHQGCLGKIGGHGAEY	YGAEALERMFASFPTT	K	I	G	E	R	M	3	1	0	0	0	0	3	4	1	1	1	0	0	0	0	0	0	0	1	0	0	0	15	0	1528.73	Q9CY10;Q91VB8;Q8BPF4;A8DUV3;P01942;Q9QWJ3;Q9CY06;Q61649	Q9CY10	18	32	haemaglobin alpha 2;Hbat1;Hba	Hemoglobin subunit alpha	yes	no	2;3	1.7557e-06	143.46		By matching	By MS/MS
IGNTGGMLDNILASK	GIKPGCFKIGNTGGML	LDNILASKLYRPGSVA	K	I	G	S	K	L	1	0	2	1	0	0	0	3	0	2	2	1	1	0	0	1	1	0	0	0	0	0	15	0	1502.78	Q3TED3;Q3V117;Q91V92;Q3UEA1;Q8VDM8	Q3TED3	626	640	Acly	ATP-citrate synthase	yes	no	2	0.0027367	79.837
IIDVVYNASNNELVR	ECCTRKTRIIDVVYNA	ASNNELVRTKTLVKNC	R	I	I	V	R	T	1	1	3	1	0	0	1	0	0	2	1	0	0	0	0	1	0	0	1	3	0	0	15	0	1717.9	Q9CRJ5;Q3UJU6;Q9CQW4;Q3UA25;Q5M9L9;Q497E9;P62242	Q9CRJ5	78	92	Rps8	40S ribosomal protein S8	yes	no	2	0.00053134	89.624			By matching
IKDPDAAKPEDWDER	WDFLPPKKIKDPDAAK	KPEDWDERAKIDDPTD	K	I	K	E	R	A	2	1	0	4	0	0	2	0	0	1	0	2	0	0	2	0	0	1	0	0	0	0	15	2	1783.84	B2MWM9;P14211;Q3UWP8	B2MWM9	208	222	Calr	Calreticulin	yes	no	2;3;4	8.2968e-05	106.93			By MS/MS
ILGADTSVDLEETGR	MSSILEERILGADTSV	VDLEETGRVLSIGDGI	R	I	L	G	R	V	1	1	0	2	0	0	2	2	0	1	2	0	0	0	0	1	2	0	0	1	0	0	15	0	1574.78	D3Z6F5;Q03265;D6RJ16	D3Z6F5	9	23	Atp5a1	ATP synthase subunit alpha;ATP synthase subunit alpha, mitochondrial	yes	no	2	2.4071e-06	132.08
ILTGSSEPEAAPAPR	LLRYLLGRILTGSSEP	PEAAPAPRRLRRSVDQ	R	I	L	P	R	R	3	1	0	0	0	0	2	1	0	1	1	0	0	0	3	2	1	0	0	0	0	0	15	0	1494.77	Q9QXV0	Q9QXV0	200	214	Pcsk1n	ProSAAS;KEP;Big SAAS;Little SAAS;Big PEN-LEN;PEN;PEN-20;PEN-19;Little LEN;Big LEN	yes	yes	2	2.9004e-06	148.52			By MS/MS
ITNLTQQLEQASIVK	SLKEQAVKITNLTQQL	LEQASIVKKRSEDDLR	K	I	T	V	K	K	1	0	1	0	0	3	1	0	0	2	2	1	0	0	0	1	2	0	0	1	0	0	15	0	1684.94	E9Q557;Q9CV95	E9Q557	1624	1638	Dsp	Desmoplakin	yes	no	2	2.5061e-07	169.94	By matching		By MS/MS
ITNNMICVGFLEGGK	CEASYPGKITNNMICV	VGFLEGGKDSCQGDSG	K	I	T	G	K	D	0	0	2	0	1	0	1	3	0	2	1	1	1	1	0	0	1	0	0	1	0	0	15	0	1651.81	Q9R0T7;Q9QUK9;Q3V2E0;G3UXD0;Q7M754	Q9R0T7	179	193	Try4;Try5;Gm5409		yes	no	2	1.9257e-06	160.8		By MS/MS	By MS/MS	By matching	By matching
ITSNMFCLGFLEGGK	CTSSYPGKITSNMFCL	LGFLEGGKDSCQGDSG	K	I	T	G	K	D	0	0	1	0	1	0	1	3	0	1	2	1	1	2	0	1	1	0	0	0	0	0	15	0	1672.8	Q9D7Y7;Q9CPN9	Q9D7Y7	180	194	2210010C04Rik		yes	no	2	2.6659e-06	131.4		By MS/MS
LAAVDATVNQVLASR	EQTKGKVKLAAVDATV	VNQVLASRYGIKGFPT	K	L	A	S	R	Y	4	1	1	1	0	1	0	0	0	0	2	0	0	0	0	1	1	0	0	3	0	0	15	0	1526.84	Q3THH1;Q922R8	Q3THH1	222	236	Pdia6	Protein disulfide-isomerase A6	yes	no	2	1.4095e-29	233.97	By MS/MS		By MS/MS		By MS/MS
LAGTQPLEVLEAVQR	KFVERTLRLAGTQPLE	EVLEAVQRSLVLQRPQ	R	L	A	Q	R	S	2	1	0	0	0	2	2	1	0	0	3	0	0	0	1	0	1	0	0	2	0	0	15	0	1622.9	B9EHN0;Q02053	B9EHN0	679	693	Uba1	Ubiquitin-like modifier-activating enzyme 1	yes	no	2	4.8196e-06	145.43
LDSGKDVMTQQLNSK	SLRELCIKLDSGKDVM	MTQQLNSKSLELERVG	K	L	D	S	K	S	0	0	1	2	0	2	0	1	0	0	2	2	1	0	0	2	1	0	0	1	0	0	15	1	1662.82	Q3UVI6;Q6P5D4	Q3UVI6	984	998	Cep135	Centrosomal protein of 135 kDa	yes	no	2;3	0.0017765	80.746		By MS/MS		By MS/MS	By matching
LEQGQAIDDLMPAQK	LLIEMEQRLEQGQAID	DDLMPAQK________	R	L	E	Q	K	-	2	0	0	2	0	3	1	1	0	1	2	1	1	0	1	0	0	0	0	0	0	0	15	0	1655.82	Q04447	Q04447	367	381	Ckb	Creatine kinase B-type	yes	yes	2	1.3565e-09	139.58
LFSGSNTLHLVSTTK	PSPKRPVKLFSGSNTL	LHLVSTTKTEVIPPLV	K	L	F	T	K	T	0	0	1	0	0	0	0	1	1	0	3	1	0	1	0	3	3	0	0	1	0	0	15	0	1603.86	E9Q1Y3;E9Q414	E9Q1Y3	922	936	Apob	Apolipoprotein B-100;Apolipoprotein B-48	yes	no	2;3	4.7112e-08	179.14	By MS/MS	By MS/MS		By MS/MS	By MS/MS
LLEAQIATGGIIDPK	IEKGHGIRLLEAQIAT	TGGIIDPKESHRLPVD	R	L	L	P	K	E	2	0	0	1	0	1	1	2	0	3	2	1	0	0	1	0	1	0	0	0	0	0	15	0	1537.87	E9Q557;E9PZW0	E9Q557	2379	2393	Dsp	Desmoplakin	yes	no	2	3.9261e-06	128.06	By matching		By MS/MS
LLELGPKPEVAQQTR	TAATFARRLLELGPKP	PEVAQQTRKILSACEK	R	L	L	T	R	K	1	1	0	0	0	2	2	1	0	0	3	1	0	0	2	0	1	0	0	1	0	0	15	1	1677.94	Q8R393;Q63ZW9;Q8BTF0;F8WHL2;Q8CIE6;Q99JW9;Q8BTF3	Q8R393	484	498	Copa	Coatomer subunit alpha;Coatomer subunit alpha;Xenin;Proxenin	yes	no	3	0.014041	55.755
LPVDEEAFVIDFKPR	TYFCMSMRLPVDEEAF	FVIDFKPRASMDTVHH	R	L	P	P	R	A	1	1	0	2	0	0	2	0	0	1	1	1	0	2	2	0	0	0	0	2	0	0	15	1	1773.93	E9Q704;F8VQA4;P97467;Q8BQ31	E9Q704	85	99	Pam	Peptidyl-glycine alpha-amidating monooxygenase;Peptidylglycine alpha-hydroxylating monooxygenase;Peptidyl-alpha-hydroxyglycine alpha-amidating lyase	yes	no	3	1.2936e-06	143.05	By MS/MS		By MS/MS		By MS/MS
LQETWLPWMQQTAPR	LVSSTSSRLQETWLPW	WMQQTAPRRNDPLPSP	R	L	Q	P	R	R	1	1	0	0	0	3	1	0	0	0	2	0	1	0	2	0	2	2	0	0	0	0	15	0	1883.94	A0A0U1RQ57	A0A0U1RQ57	170	184			yes	yes	2	0.0074017	71.879		By matching	By matching	By matching	By MS/MS
LQMEAPHIIVGTPGR	NVRAEVQKLQMEAPHI	IIVGTPGRVFDMLNRR	K	L	Q	G	R	V	1	1	0	0	0	1	1	2	1	2	1	0	1	0	2	0	1	0	0	1	0	0	15	0	1617.87	Q3TLL6;Q4FZL1;Q5F2A7;Q3UXC2;Q3TGK7;Q3TFG3;P60843;Q3TSJ4;Q78WR5;Q3U8I0	Q3TLL6	147	161	Eif4a1	Eukaryotic initiation factor 4A-I	yes	no	3	0.048932	30.575			By matching
LQQVVLPLVTVNQCR	VGNVTPARLQQVVLPL	LVTVNQCRQYWGARIT	R	L	Q	C	R	Q	0	1	1	0	1	3	0	0	0	0	3	0	0	0	1	0	1	0	0	4	0	0	15	0	1765.99	Q9ER05;Q9D7P8;Q9D960;Q9DC82	Q9ER05	174	188	Ctrl		yes	no	2;3	1.2681e-06	156.24	By MS/MS		By MS/MS
LTGLLDLALEKDYVR	AYQVRNCRLTGLLDLA	ALEKDYVRTKVADYMN	R	L	T	V	R	T	1	1	0	2	0	0	1	1	0	0	5	1	0	0	0	0	1	0	1	1	0	0	15	1	1717.96	Q8C5B4;E9PV85;P00688	P00688	174	188	Amy2a1;Amy2	Alpha-amylase;Pancreatic alpha-amylase	no	no	2;3	1.6364e-20	214.45		By MS/MS		By MS/MS
LVLEVAQHLGESTVR	EVQGRDSRLVLEVAQH	HLGESTVRTIAMDGTE	R	L	V	V	R	T	1	1	0	0	0	1	2	1	1	0	3	0	0	0	0	1	1	0	0	3	0	0	15	0	1649.91	P56480	P56480	95	109	Atp5b	ATP synthase subunit beta, mitochondrial	yes	yes	3	0.0013832	72.898			By MS/MS
LYQPEYQEVSTEEQR	FIFETQDKLYQPEYQE	EVSTEEQREEISGKLS	K	L	Y	Q	R	E	0	1	0	0	0	3	4	0	0	0	1	0	0	0	1	1	1	0	2	1	0	0	15	0	1897.87	Q9JKR6	Q9JKR6	754	768	Hyou1	Hypoxia up-regulated protein 1	yes	yes	2	3.5317e-05	104.95			By matching
MDATANDVPSPYEVK	DPNIVIAKMDATANDV	VPSPYEVKGFPTIYFS	K	M	D	V	K	G	2	0	1	2	0	0	1	0	0	0	0	1	1	0	2	1	1	0	1	2	0	0	15	0	1635.74	P27773	P27773	434	448	Pdia3	Protein disulfide-isomerase A3	yes	yes	2	2.8333e-06	130.95			By MS/MS
NAVTQEFGPVPDTAR	NGKANSVRNAVTQEFG	GPVPDTARYYKKHGIR	R	N	A	A	R	Y	2	1	1	1	0	1	1	1	0	0	0	0	0	1	2	0	2	0	0	2	0	0	15	0	1600.78	Q99KI0	Q99KI0	634	648	Aco2	Aconitate hydratase, mitochondrial	yes	yes	2	6.6253e-06	120.92
NPDDITNEEYGEFYK	KTKPIWTRNPDDITNE	EEYGEFYKSLTNDWEE	R	N	P	Y	K	S	0	0	2	2	0	0	3	1	0	1	0	1	0	1	1	0	1	0	2	0	0	0	15	0	1832.77	Q80Y52;Q3UIF3;Q3TKA2;P07901;Q3TJU7;A0PJ91;Q3TKB9;Q8C5U3;Q3TKG0	Q80Y52	301	315	Hsp90aa1	Heat shock protein HSP 90-alpha	yes	no	2	6.1041e-52	282.24			By matching		By MS/MS
NPDDITQEEYGEFYK	KTKPIWTRNPDDITQE	EEYGEFYKSLTNDWED	R	N	P	Y	K	S	0	0	1	2	0	1	3	1	0	1	0	1	0	1	1	0	1	0	2	0	0	0	15	0	1846.79	Q71LX8;P11499;E9Q3D6	Q71LX8	292	306	Hsp90ab1	Heat shock protein HSP 90-beta	yes	no	2	1.3046e-29	218.68			By MS/MS		By MS/MS
NQLTSNPENTVFDAK	RLIGDAAKNQLTSNPE	ENTVFDAKRLIGRTWN	K	N	Q	A	K	R	1	0	3	1	0	1	1	0	0	0	1	1	0	1	1	1	2	0	0	1	0	0	15	0	1676.8	Q3U9G2;Q3TWF2;P20029;Q9DC41;Q3TKF8;Q3TI47;Q3U7T8;Q3U6V3;Q3UEM8	Q3U9G2	83	97	Hspa5	78 kDa glucose-regulated protein	yes	no	2	7.1886e-21	189.1	By MS/MS		By MS/MS		By MS/MS
NQVAMNPTNTVFDAK	RLIGDAAKNQVAMNPT	TNTVFDAKRLIGRRFD	K	N	Q	A	K	R	2	0	3	1	0	1	0	0	0	0	0	1	1	1	1	0	2	0	0	2	0	0	15	0	1648.79	Q3UBA6;Q3TZJ3;Q3TH56;Q3TEK2;P63017;Q504P4;Q3U9L2;Q3TF16;Q3TQ13;Q3UDS0;Q3ULM1;Q3TRH3;Q3TB63;D3Z5E2;D3YW43	Q3UBA6	57	71	Hspa8	Heat shock cognate 71 kDa protein	yes	no	2	3.0941e-21	214.48			By MS/MS		By MS/MS
NSIAYLDEAAGNLKK	QNITYHCKNSIAYLDE	EAAGNLKKALLIQGSN	K	N	S	K	K	A	3	0	2	1	0	0	1	1	0	1	2	2	0	0	0	1	0	0	1	0	0	0	15	1	1605.84	P28481-2;P28481-7;P28481-6;P28481-5;P28481-4;P28481-1;P28481	P28481-2	1298	1312	Col2a1	Collagen alpha-1(II) chain;Collagen alpha-1(II) chain;Chondrocalcin	yes	no	2	0.032812	54.72					By MS/MS
PIPPPTWGTTGMGKK	________________	GTTGMGKKMSNMENSF	-	P	I	K	K	M	0	0	0	0	0	0	0	3	0	1	0	2	1	0	4	0	3	1	0	0	0	0	15	1	1566.82	Q6A075	Q6A075	1	15	Gas7		yes	yes	2	0.024567	49.298
PSAAQKSLNFNPVCK	APYQLYTKPSAAQKSL	LNFNPVCKPEDPGPGP	K	P	S	C	K	P	2	0	2	0	1	1	0	0	0	0	1	2	0	1	2	2	0	0	0	1	0	0	15	1	1659.84	Q920Q2	Q920Q2	135	149	Rev1	DNA repair protein REV1	yes	yes	2	0.0078477	60.657		By MS/MS		By matching	By MS/MS
QDLPNAMAISEMTDK	VLLLFANKQDLPNAMA	AISEMTDKLGLQSLRN	K	Q	D	D	K	L	2	0	1	2	0	1	1	0	0	1	1	1	2	0	1	1	1	0	0	0	0	0	15	0	1662.76	Q14BR4;Q9DD04;P61750;F6UFB9;E9Q798	Q14BR4	128	142	Arf4	ADP-ribosylation factor 4	yes	no	2	4.6451e-06	126.16
QDLPNAMNAAEITDK	VLLVFANKQDLPNAMN	NAAEITDKLGLHSLRH	K	Q	D	D	K	L	3	0	2	2	0	1	1	0	0	1	1	1	1	0	1	0	1	0	0	0	0	0	15	0	1629.77	Q3U344;Q8BSL7;P84078;P61205	Q3U344	128	142	Arf3;Arf2;Arf1	ADP-ribosylation factor 2;ADP-ribosylation factor 1;ADP-ribosylation factor 3	yes	no	2	2.3101e-06	120.32
QEEKEEEEEEEAVAR	QQQARKAKQEEKEEEE	EEEEAVAREKAGPEEV	K	Q	E	A	R	E	2	1	0	0	0	1	9	0	0	0	0	1	0	0	0	0	0	0	0	1	0	0	15	1	1832.79	P26339;Q3UN28	P26339	235	249	Chga	Chromogranin-A;Pancreastatin;Beta-granin;WE-14;Catestatin;GE-25;Serpinin-RRG;Serpinin;p-Glu serpinin precursor	yes	no	2;3	2.8532e-85	333.66	By MS/MS		By MS/MS	By MS/MS	By MS/MS
RDFPEEVAIAEELGR	WLVKGRGRRDFPEEVA	AIAEELGRRHADGSFS	R	R	D	G	R	R	2	2	0	1	0	0	4	1	0	1	1	0	0	1	1	0	0	0	0	1	0	0	15	1	1729.86	P55095;A2AS86	P55095	130	144	Gcg	Glucagon;Glicentin;Glicentin-related polypeptide;Oxyntomodulin;Glucagon;Glucagon-like peptide 1;Glucagon-like peptide 1(7-37);Glucagon-like peptide 1(7-36);Glucagon-like peptide 2	yes	no	2;3	6.3149e-21	218.83	By matching		By MS/MS		By matching
SAIYQLEEEYENLLK	IKADLREKSAIYQLEE	EEYENLLKASFERMDH	K	S	A	L	K	A	1	0	1	0	0	1	4	0	0	1	3	1	0	0	0	1	0	0	2	0	0	0	15	0	1840.91	E9Q557;E9PZW0	E9Q557	258	272	Dsp	Desmoplakin	yes	no	2	0.02451	58.885			By MS/MS
SANAEDAQEFSDVER	________________	QEFSDVERAIETLIKN	R	S	A	E	R	A	3	1	1	2	0	1	3	0	0	0	0	0	0	1	0	2	0	0	0	1	0	0	15	0	1666.71	Q9D2Q8	Q9D2Q8	6	20	S100a14	Protein S100-A14	yes	yes	2	9.3096e-12	196.8			By MS/MS
SDLSILQSSQKCLSR	VGYCSSTRSDLSILQS	SSQKCLSRKQQKQLKK	R	S	D	S	R	K	0	1	0	1	1	2	0	0	0	1	3	1	0	0	0	5	0	0	0	0	0	0	15	1	1720.88	E9Q9S3;B2RUE3;Q6EJB6	E9Q9S3	753	767	Utp14b	U3 small nucleolar RNA-associated protein 14 homolog B	yes	no	3	0.0066106	62.287
SETCTGQDLADLGDR	TASTTDSKSETCTGQD	DLADLGDRLRDWFQLL	K	S	E	D	R	L	1	1	0	3	1	1	1	2	0	0	2	0	0	0	0	1	2	0	0	0	0	0	15	0	1636.7	Q80U51;F6SLR4;Q9ER58;Q6PAN0	Q80U51	153	167	Spock2	Testican-2	yes	no	2	1.8796e-06	133.48			By MS/MS
SHTEGSLCVGVDPNR	NRMWRKTRSHTEGSLC	CVGVDPNRNWDAAFGM	R	S	H	N	R	N	0	1	1	1	1	0	1	2	1	0	1	0	0	0	1	2	1	0	0	2	0	0	15	0	1626.74	Q7TPZ8	Q7TPZ8	241	255	Cpa1	Carboxypeptidase A1	yes	yes	3	1.343e-05	105.99			By MS/MS
SIPAYLAETLYYAMK	LAVVKSIRSIPAYLAE	ETLYYAMKGAGTDDHT	R	S	I	M	K	G	3	0	0	0	0	0	1	0	0	1	2	1	1	0	1	1	1	0	3	0	0	0	15	0	1732.87	P48036	P48036	244	258	Anxa5	Annexin A5	yes	yes	2;3	0.0031627	68.972					By MS/MS
SLGDDISSETSGDFR	AYYTVYKKSLGDDISS	SETSGDFRKALLTLAD	K	S	L	F	R	K	0	1	0	3	0	0	1	2	0	1	1	0	0	1	0	4	1	0	0	0	0	0	15	0	1584.69	Q8C1X9;Q3U737;Q3TLP4;Q3TFK4;O35639;A0A0G2JDV9;Q3TET3	Q8C1X9	139	153	Anxa3	Annexin;Annexin A3	yes	no	2	5.73e-06	123.29			By MS/MS
SPAAQYVDLLLNPER	FCELDDERSPAAQYVD	DLLLNPERYTGYKGSS	R	S	P	E	R	Y	2	1	1	1	0	1	1	0	0	0	3	0	0	0	2	1	0	0	1	1	0	0	15	0	1684.88	Q14DR9;Q8R2E9	Q14DR9	172	186	Ero1lb	ERO1-like protein beta	yes	no	2	3.9681e-10	182.35	By matching		By MS/MS		By MS/MS
SPNQNVQQAAAGALR	CKLVDLLRSPNQNVQQ	QAAAGALRNLVFRSTP	R	S	P	L	R	N	4	1	2	0	0	3	0	1	0	0	1	0	0	0	1	1	0	0	0	1	0	0	15	0	1523.78	P97350	P97350	299	313	Pkp1	Plakophilin-1	yes	yes	2	3.0657e-21	214.61			By MS/MS
SQGFEELLELPSDPR	RRRIPSLKSQGFEELL	LELPSDPREENFVQDM	K	S	Q	P	R	E	0	1	0	1	0	1	3	1	0	0	3	0	0	1	2	2	0	0	0	0	0	0	15	0	1715.84	Q810T7;E9PVA5	Q810T7	445	459	Slc22a30		yes	no	3	0.0015225	74.789					By MS/MS
STTAGSSCFGVDPNR	DRMWRKTRSTTAGSSC	CFGVDPNRNFDAGWCE	R	S	T	N	R	N	1	1	1	1	1	0	0	2	0	0	0	0	0	1	1	3	2	0	0	1	0	0	15	0	1554.67	B2RS76	B2RS76	236	250	Cpb1		yes	yes	2	3.5784e-10	183.81			By MS/MS
SVTLNNYVQLGVLPR	IALLRLAKSVTLNNYV	VQLGVLPREGTILANN	K	S	V	P	R	E	0	1	2	0	0	1	0	1	0	0	3	0	0	0	1	1	1	0	1	3	0	0	15	0	1671.93	Q91X79	Q91X79	128	142	Cela1	Chymotrypsin-like elastase family member 1	yes	yes	2;3	4.1609e-15	206.18	By matching	By MS/MS	By matching	By MS/MS	By matching
TAESGELHGLTTDEK	WEPFASGKTAESGELH	HGLTTDEKFVEGVYRV	K	T	A	E	K	F	1	0	0	1	0	0	3	2	1	0	2	1	0	0	0	1	3	0	0	0	0	0	15	0	1586.74	Q5M9K1;P07309;Q9D6A4	Q5M9K1	69	83	Ttr	Transthyretin	yes	no	2;3	2.6941e-61	294	By MS/MS		By MS/MS
TCGFDFSGALEDISK	GYRYYDPKTCGFDFSG	GALEDISKIPEQSVLL	K	T	C	S	K	I	1	0	0	2	1	0	1	2	0	1	1	1	0	2	0	2	1	0	0	0	0	0	15	0	1645.73	P05202	P05202	186	200	Got2	Aspartate aminotransferase, mitochondrial	yes	yes	2	0.011347	66.826			By MS/MS
TCLLNETGDEPFQYK	AVTEAIVRTCLLNETG	GDEPFQYKN_______	R	T	C	Y	K	N	0	0	1	1	1	1	2	1	0	0	2	1	0	1	1	0	2	0	1	0	0	0	15	0	1813.82	P15105;V9GZG5	P15105	358	372	Glul	Glutamine synthetase	yes	no	2	0.00010985	100.11
TDDYLDQPCLETINR	GHALALYRTDDYLDQP	PCLETINRIKLYSESL	R	T	D	N	R	I	0	1	1	3	1	1	1	0	0	1	2	0	0	0	1	0	2	0	1	0	0	0	15	0	1851.83	P50396	P50396	194	208	Gdi1	Rab GDP dissociation inhibitor alpha	yes	yes	2	2.9673e-15	208.15			By matching		By MS/MS
TDLTGAFNMDPVYLK	SAMWVKRRTDLTGAFN	NMDPVYLKHSHQDSGF	R	T	D	L	K	H	1	0	1	2	0	0	0	1	0	0	2	1	1	1	1	0	2	0	1	1	0	0	15	0	1683.82	Q5SUV8;O88533	Q5SUV8	320	334	Ddc	Aromatic-L-amino-acid decarboxylase	yes	no	2	2.7498e-05	108.58			By matching		By matching
TETVEEPLEEDEAAK	PIYVWSSKTETVEEPL	LEEDEAAKEEKEESDD	K	T	E	A	K	E	2	0	0	1	0	0	6	0	0	0	1	1	0	0	1	0	2	0	0	1	0	0	15	0	1688.76	Q91V38;Q3UAD6;P08113;Q3UBU0;Q3TUD6;Q8CCY5;Q8C2R2;F7C312	Q91V38	286	300	Hsp90b1	Endoplasmin	yes	no	2	2.9226e-06	130.72			By matching
TIAECLADELINAAK	EAAFRNIKTIAECLAD	DELINAAK________	K	T	I	A	K	-	4	0	1	1	1	0	2	0	0	2	2	1	0	0	0	0	1	0	0	0	0	0	15	0	1630.82	D3YYM6;Q91V55	D3YYM6	168	182	Rps5		yes	no	2	1.2435e-06	125.97
TIAIIAEGIPEALTR	TMNYAQIRTIAIIAEG	GIPEALTRKLIKKADQ	R	T	I	T	R	K	3	1	0	0	0	0	2	1	0	4	1	0	0	0	1	0	2	0	0	0	0	0	15	0	1566.9	Q3TED3;Q3V117;Q91V92;Q3UEA1;Q8VDM8	Q3TED3	583	597	Acly	ATP-citrate synthase	yes	no	2;3	3.4071e-07	165.86	By MS/MS		By matching		By MS/MS
TKPYIQVDIGGGQTK	PFKVVEKKTKPYIQVD	DIGGGQTKTFAPEEIS	K	T	K	T	K	T	0	0	0	1	0	2	0	3	0	2	0	2	0	0	1	0	2	0	1	1	0	0	15	1	1603.86	Q3U9G2;Q3TWF2;P20029;Q9DC41;Q3TKF8;Q3TI47;Q3U7T8;Q3U6V3;Q3UEM8	Q3U9G2	125	139	Hspa5	78 kDa glucose-regulated protein	yes	no	3	3.4207e-05	100.98		By matching	By matching	By matching
TPAGLQVLNDYLADK	________________	LNDYLADKSYIEGLPG	K	T	P	D	K	S	2	0	1	2	0	1	0	1	0	0	3	1	0	0	1	0	1	0	1	1	0	0	15	0	1616.84	A0A087WS46;O70251;M0QWK5;M0QWH8;G3UX43;G3UZ47	A0A087WS46	8	22	Eef1b2;Eef1b	Elongation factor 1-beta	yes	no	2	2.6058e-06	131.56
TTDGVYEGVAIGGDR	ELNNIISRTTDGVYEG	GVAIGGDRYPGSTFMD	R	T	T	D	R	Y	1	1	0	2	0	0	1	4	0	1	0	0	0	0	0	0	2	0	1	2	0	0	15	0	1508.71	Q3TED3;Q3V117;Q91V92;Q3UEA1;Q8VDM8;Q3UVY4	Q3TED3	667	681	Acly	ATP-citrate synthase	yes	no	2	1.9792e-06	160.65					By MS/MS
VCNYVDWIQNTIAAN	DNPGVYTKVCNYVDWI	IQNTIAAN________	K	V	C	A	N	-	2	0	3	1	1	1	0	0	0	2	0	0	0	0	0	0	1	1	1	2	0	0	15	0	1779.83	Q9R0T7;Q7M754;Q792Z1	Q9R0T7	232	246	Try4;Gm5409;Try10		no	no	2	3.7891e-05	103.76	By matching	By MS/MS	By matching
VCNYVDWIQNTIADN	DAPGVYTKVCNYVDWI	IQNTIADN________	K	V	C	D	N	-	1	0	3	2	1	1	0	0	0	2	0	0	0	0	0	0	1	1	1	2	0	0	15	0	1823.81	Q792Y6;P07146	Q792Y6	232	246	Prss2	Anionic trypsin-2	yes	no	2	0.00053134	89.624	By MS/MS	By MS/MS		By matching
VDQSILTGESVSVIK	SIKSTTLRVDQSILTG	GESVSVIKHTDPVPDP	R	V	D	I	K	H	0	0	0	1	0	1	1	1	0	2	1	1	0	0	0	3	1	0	0	3	0	0	15	0	1573.86	O54994;J3KMM5;Q5DTI2;O55143-2;O55143;Q8R429	O54994	70	84	Atp2a2;Atp2a1	Calcium-transporting ATPase;Sarcoplasmic/endoplasmic reticulum calcium ATPase 2;Sarcoplasmic/endoplasmic reticulum calcium ATPase 1	yes	no	2	5.2949e-05	101.53
VEGFPTIYFAPSGDK	DITNDQYKVEGFPTIY	YFAPSGDKKNPIKFEG	K	V	E	D	K	K	1	0	0	1	0	0	1	2	0	1	0	1	0	2	2	1	1	0	1	1	0	0	15	0	1626.79	A0A0R4J0Z1;P08003	A0A0R4J0Z1	593	607	Pdia4	Protein disulfide-isomerase A4	yes	no	2	0.025847	58.079			By matching
VGEATETALTCLVEK	EAKGVYEKVGEATETA	ALTCLVEKMNVFDTEL	K	V	G	E	K	M	2	0	0	0	1	0	3	1	0	0	2	1	0	0	0	0	3	0	0	2	0	0	15	0	1619.81	O54994;J3KMM5;Q5DTI2;O55143-2;O55143	O54994	332	346	Atp2a2	Calcium-transporting ATPase;Sarcoplasmic/endoplasmic reticulum calcium ATPase 2	no	no	2	9.7216e-05	100.43			By matching
VINQILTEMDGMSTK	DGGGAADRVINQILTE	EMDGMSTKKNVFIIGA	R	V	I	T	K	K	0	0	1	1	0	1	1	1	0	2	1	1	2	0	0	1	2	0	0	1	0	0	15	0	1678.83	Q01853;Q8BNF8	Q01853	600	614	Vcp	Transitional endoplasmic reticulum ATPase	yes	no	2	0.00061591	87.519
VLQLTSWDEDAWASK	AEINEIIRVLQLTSWD	DEDAWASKDTEAMKRA	R	V	L	S	K	D	2	0	0	2	0	1	1	0	0	0	2	1	0	0	0	2	1	2	0	1	0	0	15	0	1747.84	Q64727	Q64727	247	261	Vcl	Vinculin	yes	yes	2	0.015095	64.565		By MS/MS		By matching
VLVGANFEEVAFDEK	DWDKQPVKVLVGANFE	EEVAFDEKKNVFVEFY	K	V	L	E	K	K	2	0	1	1	0	0	3	1	0	0	1	1	0	2	0	0	0	0	0	3	0	0	15	0	1665.83	Q3UDR2;Q3URP6;Q3U738;Q3TWE3;Q3TIM0;Q3THC3;Q3TF72;P09103;Q3TGS0;Q3UBY9;Q3UJA8;Q3UA23;Q3TIQ5	Q3UDR2	373	387	P4hb	Protein disulfide-isomerase	yes	no	2;3	1.2177e-05	115.68	By MS/MS		By MS/MS		By MS/MS
VNQIGSVTESLQACK	SCNCLLLKVNQIGSVT	TESLQACKLAQSNGWG	K	V	N	C	K	L	1	0	1	0	1	2	1	1	0	1	1	1	0	0	0	2	1	0	0	2	0	0	15	0	1632.81	Q5FW97;P17182;Q6PHC1	Q5FW97	344	358	EG433182;Eno1	Alpha-enolase	yes	no	2	9.1599e-06	117.08
VSTFAMRSLASLALR	SKAGICHKVSTFAMRS	SLASLALRVTNPRTSP	K	V	S	L	R	V	3	2	0	0	0	0	0	0	0	0	3	0	1	1	0	3	1	0	0	1	0	0	15	1	1621.9	Q8BL86	Q8BL86	257	271	Mblac2	Metallo-beta-lactamase domain-containing protein 2	yes	yes	2	0.0032425	69.345		By MS/MS		By MS/MS	By matching
VTALMPWVQEILEAN	STPAVYARVTALMPWV	VQEILEAN________	R	V	T	A	N	-	2	0	1	0	0	1	2	0	0	1	2	0	1	0	1	0	1	1	0	2	0	0	15	0	1712.88	Q9CR35	Q9CR35	249	263	Ctrb1	Chymotrypsinogen B;Chymotrypsin B chain A;Chymotrypsin B chain B;Chymotrypsin B chain C	yes	yes	2	0.00056462	88.796	By MS/MS	By MS/MS	By MS/MS	By matching
VTDDMLCAGDMDGGK	CAKAHIEKVTDDMLCA	AGDMDGGKDTCAGDSG	K	V	T	G	K	D	1	0	0	4	1	0	0	3	0	0	1	1	2	0	0	0	1	0	0	1	0	0	15	0	1583.63	A0A0B6VSQ6;P15947;A0A0U1RPN5;Q7M0B4	A0A0B6VSQ6	192	206	Klk1	Kallikrein-1	yes	no	2	0.0008204	85.493			By MS/MS
VVGAQVAQMIDILVR	TQAANNVRVVGAQVAQ	QMIDILVRNFNYSASK	R	V	V	V	R	N	2	1	0	1	0	2	0	1	0	2	1	0	1	0	0	0	0	0	0	4	0	0	15	0	1610.92	Q5BKQ4	Q5BKQ4	142	156	Pnliprp1	Inactive pancreatic lipase-related protein 1	yes	yes	2	0.00015681	98.943	By MS/MS	By MS/MS
VVLAYEPVWAIGTGK	DNVKDWSKVVLAYEPV	VWAIGTGKTATPQQAQ	K	V	V	G	K	T	2	0	0	0	0	0	1	2	0	1	1	1	0	0	1	0	1	1	1	3	0	0	15	0	1601.88	P17751;H7BXC3	P17751	211	225	Tpi1	Triosephosphate isomerase	yes	no	2	0.00048707	90.725	By MS/MS	By matching	By MS/MS	By matching	By matching
WKDDNCDAQYSFVCK	TSNTGYKKWKDDNCDA	AQYSFVCKFKG_____	K	W	K	C	K	F	1	0	1	3	2	1	0	0	0	0	0	2	0	1	0	1	0	1	1	1	0	0	15	1	1934.79	Q8C6F9;Q3TV26;P43137	Q8C6F9	109	123	Reg1	Lithostathine-1	yes	no	3	0.0016381	77.325			By MS/MS
WKDENCEAQYSFVCK	TSNTAYKKWKDENCEA	AQYSFVCKFRA_____	K	W	K	C	K	F	1	0	1	1	2	1	2	0	0	0	0	2	0	1	0	1	0	1	1	1	0	0	15	1	1962.82	Q545J0;Q08731	Q545J0	156	170	Reg2	Lithostathine-2	yes	no	3	0.032556	45.452			By MS/MS
YDDSQDHFCELDDER	EAFIDWARYDDSQDHF	FCELDDERSPAAQYVD	R	Y	D	E	R	S	0	1	0	5	1	1	2	0	1	0	1	0	0	1	0	1	0	0	1	0	0	0	15	0	1942.73	Q14DR9;Q8R2E9	Q14DR9	157	171	Ero1lb	ERO1-like protein beta	yes	no	3	5.8553e-06	114.64			By matching
YDGQVAVFGSDFQEK	KCLPRQNRYDGQVAVF	FGSDFQEKLSKQKYFL	R	Y	D	E	K	L	1	0	0	2	0	2	1	2	0	0	0	1	0	2	0	1	0	0	1	2	0	0	15	0	1688.77	B9EHN0;Q02053	B9EHN0	451	465	Uba1	Ubiquitin-like modifier-activating enzyme 1	yes	no	2	0.001804	82.59
YSDIEPSTEGEVIFR	DDIICDSRYSDIEPST	TEGEVIFRALDPAFKI	R	Y	S	F	R	A	0	1	0	1	0	0	3	1	0	2	0	0	0	1	1	2	1	0	1	1	0	0	15	0	1740.82	Q3TNZ8;Q0V927;E9PYT5;Q3UHL7;E9QN70;B9EKB0;P02469	Q3TNZ8	194	208	Lamb1	Laminin subunit beta-1	yes	no	2	2.4789e-05	109.83
AAALLAAESAVVTLAK	ELAPEYSKAAALLAAE	SAVVTLAKVDGPAEPE	K	A	A	A	K	V	7	0	0	0	0	0	1	0	0	0	3	1	0	0	0	1	1	0	0	2	0	0	16	0	1497.88	D3Z6P0-2;D3Z6P0;F6S5U2	D3Z6P0-2	87	102	Pdia2	Protein disulfide-isomerase A2	yes	no	2;3	7.5024e-06	106.6	By MS/MS		By MS/MS
AAGVSVEPFWPGLFAK	DKINALIKAAGVSVEP	FWPGLFAKALANVNIG	K	A	A	A	K	A	3	0	0	0	0	0	1	2	0	0	1	1	0	2	2	1	0	1	0	2	0	0	16	0	1674.88	Q58E35;P47955;E9Q3T0	Q58E35	34	49	Rplp1;Gm10073	60S acidic ribosomal protein P1	yes	no	2	0.0012376	82.483		By matching			By MS/MS
AGAGSATLSMAYAGAR	GTEVVKAKAGAGSATL	SMAYAGARFVFSLVDA	K	A	G	A	R	F	6	1	0	0	0	0	0	3	0	0	1	0	1	0	0	2	1	0	1	0	0	0	16	0	1453.7	P08249	P08249	242	257	Mdh2	Malate dehydrogenase, mitochondrial	yes	yes	2	0.0072516	62.055
ALEQFLQEYFDGNLKR	EEFSRDGKALEQFLQE	YFDGNLKRYLKSEPIP	K	A	L	K	R	Y	1	1	1	1	0	2	2	1	0	0	3	1	0	2	0	0	0	0	1	0	0	0	16	1	1969.99	P27773	P27773	348	363	Pdia3	Protein disulfide-isomerase A3	yes	yes	3	0.016276	50.178					By MS/MS
AMSQLEEELRRHESEK	SQISSMAKAMSQLEEE	LRRHESEKATMLGDVS	K	A	M	E	K	A	1	2	0	0	0	1	5	0	1	0	2	1	1	0	0	2	0	0	0	0	0	0	16	2	1970.95	Q3UVI6;Q6P5D4	Q3UVI6	952	967	Cep135	Centrosomal protein of 135 kDa	yes	no	3	0.035547	44.252				By MS/MS
APVPTGEVYFADSFDR	PSPKVTYKAPVPTGEV	YFADSFDRGSLSGWIL	K	A	P	D	R	G	2	1	0	2	0	0	1	1	0	0	0	0	0	2	2	1	1	0	1	2	0	0	16	0	1769.83	Q5SUC3;Q3TXE5;P35564	Q5SUC3	63	78	Canx	Calnexin	yes	no	2	0.00079107	84.508			By matching
AQDGSSPLSLQDLIEK	RLVACWTKAQDGSSPL	SLQDLIEKVVILRKAV	K	A	Q	E	K	V	1	0	0	2	0	2	1	1	0	1	3	1	0	0	1	3	0	0	0	0	0	0	16	0	1699.86	S4R256;S4R2A9;Q3UPL0-2;Q3UPL0	S4R256	19	34	Sec31a	Protein transport protein Sec31A	yes	no	2	0.00013456	89.502
AYLPVNESFGFTADLR	GTPMFVVKAYLPVNES	FGFTADLRSNTGGQAF	K	A	Y	L	R	S	2	1	1	1	0	0	1	1	0	0	2	0	0	2	1	1	1	0	1	1	0	0	16	0	1798.89	Q8C153;Q3UZ14;Q3UMI7;Q3UDC8;Q3TX47;Q3TWX1;Q3TLB1;Q3TJZ1;P58252;Q6P9L9;Q8BMA8;Q3TW58;Q3UBL9;Q3TK17;Q3TSK4;Q3TPG2;Q99LT6;Q61509	Q8C153	786	801	Eef2	Elongation factor 2	yes	no	2	0.0016946	80.411	By MS/MS
DINEIDINMNDPLFTK	DRKKRGYRDINEIDIN	MNDPLFTKQWYLFNTG	R	D	I	T	K	Q	0	0	3	3	0	0	1	0	0	3	1	1	1	1	1	0	1	0	0	0	0	0	16	0	1890.9	Q3UZV3;Q547J8;Q3TYM6;Q3TT48;P21661	Q3UZV3	94	109	Pcsk2	Neuroendocrine convertase 2	yes	no	2;3	1.3015e-07	162.59	By MS/MS		By MS/MS	By MS/MS	By MS/MS
DLVSSLTSGLLTIGDR	IICARAGKDLVSSLTS	GLLTIGDRFGGALDAA	K	D	L	D	R	F	0	1	0	2	0	0	0	2	0	1	4	0	0	0	0	3	2	0	0	1	0	0	16	0	1645.89	Q3TED3;Q3V117;Q91V92;Q8VDM8;Q3UVY4;Q99K05	Q3TED3	909	924	Acly	ATP-citrate synthase	yes	no	2;3	8.9726e-07	166.04	By MS/MS	By matching			By MS/MS
DNHCGLATAASYPVVN	YIKIAKDRDNHCGLAT	AASYPVVN________	R	D	N	V	N	-	3	0	2	1	1	0	0	1	1	0	1	0	0	0	1	1	1	0	1	2	0	0	16	0	1687.76	Q3UWH6;Q9D0C0;Q543M3;Q3UHZ4;Q3U5U9;Q3TVJ1;Q3TT75;Q3TNC8;P06797	Q3UWH6	293	308	Ctsl	Cathepsin L1;Cathepsin L1 heavy chain;Cathepsin L1 light chain	yes	no	2	6.0484e-05	102.65			By MS/MS
DQNDWIGPPNNNGVTK	NRNFQNGKDQNDWIGP	PNNNGVTKEVTINADT	K	D	Q	T	K	E	0	0	4	2	0	1	0	2	0	1	0	1	0	0	2	0	1	1	0	1	0	0	16	0	1767.82	Q8C5B4;Q61298;P00688;Q61299	P00688	365	380	Amy2	Alpha-amylase;Pancreatic alpha-amylase	no	no	2;3	1.9587e-32	187	By MS/MS	By MS/MS	By MS/MS
EAAQMDMVNDGVEDLR	GLYGKNQREAAQMDMV	NDGVEDLRGKYVTLIY	R	E	A	L	R	G	2	1	1	3	0	1	2	1	0	0	1	0	2	0	0	0	0	0	0	2	0	0	16	0	1791.78	P19157	P19157	86	101	Gstp1	Glutathione S-transferase P 1	yes	yes	2	9.4946e-10	181.51			By MS/MS
EEEAIQLDGLNASQIR	TDDEVVQREEEAIQLD	GLNASQIRELREKSEK	R	E	E	I	R	E	2	1	1	1	0	2	3	1	0	2	2	0	0	0	0	1	0	0	0	0	0	0	16	0	1784.89	Q91V38;Q3UAD6;P08113;Q3UBU0	Q91V38	52	67	Hsp90b1	Endoplasmin	yes	no	2	4.194e-06	162.46			By matching		By MS/MS
EELTAFLHPEEFPHMR	DGDSMATREELTAFLH	PEEFPHMRDIVVAETL	R	E	E	M	R	D	1	1	0	0	0	0	4	0	2	0	2	0	1	2	2	0	1	0	0	0	0	0	16	0	1981.94	D3Z3A9;D3Z7T1;Q8BH97	D3Z3A9	186	201	Rcn3	Reticulocalbin-3	yes	no	4	1.1042e-05	113.4		By MS/MS		By MS/MS	By MS/MS
EESDDEAAVEEEEEEK	DEAAKEEKEESDDEAA	VEEEEEEKKPKTKKVE	K	E	E	E	K	K	2	0	0	2	0	0	9	0	0	0	0	1	0	0	0	1	0	0	0	1	0	0	16	0	1865.72	Q91V38;Q3UAD6;P08113;Q3UBU0;Q3TUD6;Q8CCY5;Q8C2R2;F7C312	Q91V38	304	319	Hsp90b1	Endoplasmin	yes	no	2	6.298e-10	186.77
EFPAVPYSAWDFNDNK	SYLNPNNREFPAVPYS	AWDFNDNKCNGEIDNY	R	E	F	N	K	C	2	0	2	2	0	0	1	0	0	0	0	1	0	2	2	1	0	1	1	1	0	0	16	0	1898.85	Q8C5B4;E9PV85;Q61297;P00688	P00688	140	155	Amy2a1;Amy2	Alpha-amylase;Pancreatic alpha-amylase	no	no	2	1.1865e-05	123.02		By MS/MS
EILGTAQSVGCNVDGR	RELSGTIKEILGTAQS	VGCNVDGRHPHDIIDD	K	E	I	G	R	H	1	1	1	1	1	1	1	3	0	1	1	0	0	0	0	1	1	0	0	2	0	0	16	0	1674.8	Q8C2K0;Q5BLK0;Q3TIQ2;P35979	Q8C2K0	131	146	Rpl12	60S ribosomal protein L12	yes	no	2	1.2133e-05	140.49			By MS/MS
EILVGDVGATITDPFK	CIVVEEGKEILVGDVG	ATITDPFKHFVGMLPE	K	E	I	F	K	H	1	0	0	2	0	0	1	2	0	2	1	1	0	1	1	0	2	0	0	2	0	0	16	0	1673.89	Q4FK36;Q9R0P5	Q4FK36	54	69	Dstn	Destrin	yes	no	2	0.00019579	96.773	By matching		By MS/MS
EMVDYIADYLDGIEGR	REFRRRGKEMVDYIAD	YLDGIEGRPVYPDVEP	K	E	M	G	R	P	1	1	0	3	0	0	2	2	0	2	1	0	1	0	0	0	0	0	2	1	0	0	16	0	1857.85	Q5SUV8;O88533;Q5SUV9;Q3TUH2	Q5SUV8	12	27	Ddc	Aromatic-L-amino-acid decarboxylase	yes	no	2	5.5737e-05	104.2					By MS/MS
ETTDTDTADQVIASFK	AFIDFMSRETTDTDTA	DQVIASFKVLAGDKNF	R	E	T	F	K	V	2	0	0	3	0	1	1	0	0	1	0	1	0	1	0	1	4	0	0	1	0	0	16	0	1740.81	Q1A602;Q3ULT2;Q3UDJ7;P57780;Q8BP35;Q61064	Q1A602	838	853	Actn4	Alpha-actinin-4	yes	no	2	0.0030775	74.141			By matching
EYLGAICSCTCFGGQR	HVGEQWQKEYLGAICS	CTCFGGQRGWRCDNCR	K	E	Y	Q	R	G	1	1	0	0	3	1	1	3	0	1	1	0	0	1	0	1	1	0	1	0	0	0	16	0	1877.79	B7ZNJ1;Q3UH17;A0A087WS56;B9EHT6;A0A087WSN6;Q3UHL6;Q3UGY5;A0A087WR50;P11276;Q3TCF1;Q3UHR1;Q8R3F3;Q3UZF9;Q99KD0	B7ZNJ1	2100	2115	Fn1	Fibronectin;Anastellin	yes	no	2	1.3455e-05	119.54				By matching	By matching
GGKPEPPAMPQPVPTA	TTPISEQKGGKPEPPA	MPQPVPTA________	K	G	G	T	A	-	2	0	0	0	0	1	1	2	0	0	0	1	1	0	6	0	1	0	0	1	0	0	16	1	1572.8	Q9D0A2;Q9CZP6;Q5YLW3;Q3UK56;Q3UCL7;P62908	Q9D0A2	228	243	Rps3	40S ribosomal protein S3	yes	no	2	0.005737	77.726
GHGAGGSSILTFWDAR	VDNHDNQRGHGAGGSS	ILTFWDARMYKMAVGF	R	G	H	A	R	M	2	1	0	1	0	0	0	4	1	1	1	0	0	1	0	2	1	1	0	0	0	0	16	0	1630.79	Q8C5B4;Q61298;P00688;Q61299	P00688	316	331	Amy2	Alpha-amylase;Pancreatic alpha-amylase	no	no	2;3	2.7826e-63	287.42	By MS/MS	By MS/MS	By MS/MS		By MS/MS
GLGTDEDSILNLLTSR	EVLRKAMKGLGTDEDS	ILNLLTSRSNAQRQEI	K	G	L	S	R	S	0	1	1	2	0	0	1	2	0	1	4	0	0	0	0	2	2	0	0	0	0	0	16	0	1702.87	P48036;A0A0G2JGQ0	P48036	28	43	Anxa5	Annexin A5	yes	no	2	1.154e-39	255.91	By MS/MS		By MS/MS	By matching	By MS/MS
GLGTDEDSLIEIICSR	SELKASMKGLGTDEDS	LIEIICSRTNQELQEI	K	G	L	S	R	T	0	1	0	2	1	0	2	2	0	3	2	0	0	0	0	2	1	0	0	0	0	0	16	0	1776.86	Q542G9;P07356;Q3UCD3;Q9CZI7;B0V2N7;B0V2N8;Q99KH3	Q542G9	120	135	Anxa2	Annexin;Annexin A2	yes	no	2	4.0754e-05	109.07			By matching
GLVYETSVLDPDEGIR	YGGMRGMKGLVYETSV	LDPDEGIRFRGYSIPE	K	G	L	I	R	F	0	1	0	2	0	0	2	2	0	1	2	0	0	0	1	1	1	0	1	2	0	0	16	0	1761.88	Q9DAM4;Q80X68;Q9CZU6	Q9DAM4	77	92	Csl;Cs	Citrate synthase;Citrate synthase, mitochondrial	yes	no	2	0.00046722	86.497
GPLEHLYSLHIPNCDK	TMRLPDDRGPLEHLYS	LHIPNCDKHGRYNLKQ	R	G	P	D	K	H	0	0	1	1	1	0	1	1	2	1	3	1	0	0	2	1	0	0	1	0	0	0	16	0	1891.93	P47877;D3YU40;Q9D057	P47877	228	243	Igfbp2	Insulin-like growth factor-binding protein 2	yes	no	2;3;4	4.378e-06	125.39				By MS/MS	By MS/MS
GQELIYAGMPITEVFK	MTSICDERGQELIYAG	MPITEVFKEEMGIGGV	R	G	Q	F	K	E	1	0	0	0	0	1	2	2	0	2	1	1	1	1	1	0	1	0	1	1	0	0	16	0	1794.92	Q3TED3;Q3V117;Q91V92;Q3UEA1;Q8VDM8;Q3UVY4	Q3TED3	839	854	Acly	ATP-citrate synthase	yes	no	2	0.00031182	92.38			By matching		By MS/MS
GVDIVMDPLGGSDTAK	EIKKISPKGVDIVMDP	LGGSDTAKGYHLLKPM	K	G	V	A	K	G	1	0	0	3	0	0	0	3	0	1	1	1	1	0	1	1	1	0	0	2	0	0	16	0	1573.77	Q5RKP0;Q499X4;Q3TXD3;Q62465;Q3U331	Q5RKP0	264	279	Vat1	Synaptic vesicle membrane protein VAT-1 homolog	yes	no	2	0.0038181	70.783
HPWDDISYVLPEHMSM	RLKQGLYRHPWDDISY	VLPEHMSM________	R	H	P	S	M	-	0	0	0	2	0	0	1	0	2	1	1	0	2	0	2	2	0	1	1	1	0	0	16	0	1955.85	Q3TED3;Q3V117;Q91V92;Q8VDM8;Q3UVY4;Q99K05;Q6P063	Q3TED3	1076	1091	Acly	ATP-citrate synthase	yes	no	2;3	7.0294e-05	97.631					By MS/MS
IEWLESHQDADIEDFK	MEKAVEEKIEWLESHQ	DADIEDFKAKKKELEE	K	I	E	F	K	A	1	0	0	3	0	1	3	0	1	2	1	1	0	1	0	1	0	1	0	0	0	0	16	0	1973.9	Q3U9G2;Q3TWF2;P20029;Q9DC41;Q3TKF8;Q3TI47;Q3U7T8	Q3U9G2	603	618	Hspa5	78 kDa glucose-regulated protein	yes	no	2;3	2.2673e-51	271.68	By MS/MS	By matching	By MS/MS		By MS/MS
IHFPLATYAPVISAEK	TNLVPYPRIHFPLATY	APVISAEKAYHEQLSV	R	I	H	E	K	A	3	0	0	0	0	0	1	0	1	2	1	1	0	1	2	1	1	0	1	1	0	0	16	0	1755.96	P05213;Q99KA2;P68369;Q52L87;Q3TIZ0;P68373;Q5FW91;P05214;Q9D9Y2;A0A0A0MQA5;P68368	P05213	265	280	Tuba1b;Tuba1a;Tuba1c;Tuba3a;Tuba4a	Tubulin alpha-1B chain;Tubulin alpha-1A chain;Tubulin alpha-1C chain;Tubulin alpha-3 chain;Tubulin alpha-4A chain	no	no	3	0.0001044	94.45	By matching			By matching	By MS/MS
IINEPTAAAIAYGLDK	IAGLNVMRIINEPTAA	AIAYGLDKREGEKNIL	R	I	I	D	K	R	4	0	1	1	0	0	1	1	0	3	1	1	0	0	1	0	1	0	1	0	0	0	16	0	1658.89	Q3UBA6;Q3TZJ3;Q3TH56;Q3TEK2;P63017;Q504P4;Q3U9L2;Q3TF16;Q3TQ13;Q3UDS0;Q3ULM1;Q3TB63;Q3KQJ4;Q3TH04;B7U582;P17156;B2CSK2;A1L347;P16627;Q9QWU1;Q3U9G2;Q3TWF2;P20029;Q9DC41;Q3TKF8;Q3TI47;Q3U7T8;Q3U6V3;Q3UEM8	Q3U9G2	199	214	Hspa8;Hspa2;Hspa1l;Hspa5	Heat shock cognate 71 kDa protein;Heat shock-related 70 kDa protein 2;Heat shock 70 kDa protein 1-like;78 kDa glucose-regulated protein	no	no	2;3	1.296e-05	120.63	By MS/MS		By MS/MS		By MS/MS
IMDPNIVGNEHYDVAR	DPLDSTSRIMDPNIVG	NEHYDVARGVQKILQD	R	I	M	A	R	G	1	1	2	2	0	0	1	1	1	2	0	0	1	0	1	0	0	0	1	2	0	0	16	0	1841.87	P56480	P56480	407	422	Atp5b	ATP synthase subunit beta, mitochondrial	yes	yes	3	0.00061279	81.346
IQEGVFDINNEANGIK	TAKEIYEKIQEGVFDI	NNEANGIKIGPQHAAT	K	I	Q	I	K	I	1	0	3	1	0	1	2	2	0	3	0	1	0	1	0	0	0	0	0	1	0	0	16	0	1759.87	Q0PD65;P53994;Q6PDZ3	Q0PD65	171	186	Rab2a	Ras-related protein Rab-2A	yes	no	2	0.00015598	98.281
IVLEDGTLHVTEGSGR	LVVISQGKIVLEDGTL	HVTEGSGRYIPRKPFP	K	I	V	G	R	Y	0	1	0	1	0	0	2	3	1	1	2	0	0	0	0	1	2	0	0	2	0	0	16	0	1681.86	O08553	O08553	452	467	Dpysl2	Dihydropyrimidinase-related protein 2	yes	yes	3	0.0061233	59.728			By matching
IVYGHLDDPANQEIER	RPLTLSEKIVYGHLDD	PANQEIERGKTYLRLR	K	I	V	E	R	G	1	1	1	2	0	1	2	1	1	2	1	0	0	0	1	0	0	0	1	1	0	0	16	0	1867.91	Q99KI0	Q99KI0	69	84	Aco2	Aconitate hydratase, mitochondrial	yes	yes	3	9.6235e-06	114.63
KPGVFIPSCDEDGYYR	QIQEAAKKKPGVFIPS	CDEDGYYRKMQCDQSR	K	K	P	Y	R	K	0	1	0	2	1	0	1	2	0	1	0	1	0	1	2	1	0	0	2	1	0	0	16	1	1901.86	Q80U51;F6SLR4;Q9ER58	Q80U51	285	300	Spock2	Testican-2	yes	no	3	4.4148e-06	125.67			By MS/MS
LASAYGATELQDYCGR	SSVKCLHKLASAYGAT	ELQDYCGRLFATLLPQ	K	L	A	G	R	L	3	1	0	1	1	1	1	2	0	0	2	0	0	0	0	1	1	0	2	0	0	0	16	0	1773.8	Q07797	Q07797	230	245	Lgals3bp	Galectin-3-binding protein	yes	yes	2	1.4065e-05	118.21			By MS/MS
LAVEALSSLDGDLSGR	GERRAIEKLAVEALSS	LDGDLSGRYYALKSMT	K	L	A	G	R	Y	2	1	0	2	0	0	1	2	0	0	4	0	0	0	0	3	0	0	0	1	0	0	16	0	1601.83	Q04447	Q04447	157	172	Ckb	Creatine kinase B-type	yes	yes	2	4.4592e-05	107.82			By matching
LFIGGLSFETTDDSLR	KEPEQLRKLFIGGLSF	ETTDDSLREHFEKWGT	K	L	F	L	R	E	0	1	0	2	0	0	1	2	0	1	3	0	0	2	0	2	2	0	0	0	0	0	16	0	1769.88	E9Q7H5;Q6PFA7;B2RXM2;Q0VG47;J3QNY1;Q8BG05-2;Q6P6I7;A2AL12;Q5FB19;Q3UZG3;Q8BG05	E9Q7H5	15	30	Gm8991;Hnrnpa3;Gm6793;Gm9242	Heterogeneous nuclear ribonucleoprotein A3	yes	no	2	0.004724	69.331
LGCFSDDAPWSGTLDR	GREVCFDKLGCFSDDA	PWSGTLDRPLKALPWS	K	L	G	D	R	P	1	1	0	3	1	0	0	2	0	0	2	0	0	1	1	2	1	1	0	0	0	0	16	0	1795.78	Q6P8U6;Q9D950	Q6P8U6	24	39	Pnlip;mCG_10680	Pancreatic triacylglycerol lipase;Triacylglycerol lipase	yes	no	2	0.0089569	67.646			By MS/MS
LQFNTTNCRSDTIMEK	FKESDPSKLQFNTTNC	RSDTIMEKQSFKVPLG	K	L	Q	E	K	Q	0	1	2	1	1	1	1	0	0	1	1	1	1	1	0	1	3	0	0	0	0	0	16	1	1956.9	Q8R1M0	Q8R1M0	90	105	Hmces	Embryonic stem cell-specific 5-hydroxymethylcytosine-binding protein	yes	yes	3	0.0022082	69.431		By MS/MS		By MS/MS	By MS/MS
LQQALLPVVDYEHCSR	TNGPLPDKLQQALLPV	VDYEHCSRWNWWGLSV	K	L	Q	S	R	W	1	1	0	1	1	2	1	0	1	0	3	0	0	0	1	1	0	0	1	2	0	0	16	0	1926.96	Q9CQ52;A2A9U8	Q9CQ52	174	189	Cela3b;Cela3a	Chymotrypsin-like elastase family member 3B	yes	no	2;3	2.5719e-07	110.84	By MS/MS		By MS/MS	By matching
MLGAPEEADANEEGVR	ATPKQGPRMLGAPEEA	DANEEGVRRALDFAVS	R	M	L	V	R	R	3	1	1	1	0	0	4	2	0	0	1	0	1	0	1	0	0	0	0	1	0	0	16	0	1686.75	Q3U5K7;Q9EPX9;P21460;A2APX3	Q3U5K7	29	44	Cst3	Cystatin-C	yes	no	2	4.4778e-05	111.64			By MS/MS
MTGAEVETGSQAKPDK	________________	GSQAKPDKKPQEEVAG	-	M	T	D	K	K	2	0	0	1	0	1	2	2	0	0	0	2	1	0	1	1	2	0	0	1	0	0	16	1	1647.78	Q8BUY8	Q8BUY8	1	16	Gprasp2	G-protein coupled receptor-associated sorting protein 2	yes	yes	2	0.0021241	68.751	By MS/MS		By MS/MS
MTNGFSGADLTEICQR	VDLEFLAKMTNGFSGA	DLTEICQRACKLAIRE	K	M	T	Q	R	A	1	1	1	1	1	1	1	2	0	1	1	0	1	1	0	1	2	0	0	0	0	0	16	0	1798.8	Q01853;Q8BNF8	Q01853	678	693	Vcp	Transitional endoplasmic reticulum ATPase	yes	no	2	0.021668	54.004
NIQTACLPPAGTILPR	ASPVTLSKNIQTACLP	PAGTILPRNYVCYVTG	K	N	I	P	R	N	2	1	1	0	1	1	0	1	0	2	2	0	0	0	3	0	2	0	0	0	0	0	16	0	1720.93	P05208	P05208	138	153	Cela2a	Chymotrypsin-like elastase family member 2A	yes	yes	2;3	6.3032e-13	151.8	By MS/MS		By MS/MS
NISEAELEEYTSTMMK	DLFLHHKKNISEAELE	EYTSTMMKIFDKNKDG	K	N	I	M	K	I	1	0	1	0	0	0	4	0	0	1	1	1	2	0	0	2	2	0	1	0	0	0	16	0	1874.83	Q91WD9	Q91WD9	144	159	Scgn	Secretagogin	yes	yes	2	1.5266e-05	144.73					By MS/MS
NSNLVGAAHEELQQSR	NARQSAERNSNLVGAA	HEELQQSRIRIDSLSA	R	N	S	S	R	I	2	1	2	0	0	2	2	1	1	0	2	0	0	0	0	2	0	0	0	1	0	0	16	0	1751.86	P48678-3;P48678-2;P48678	P48678-3	169	184	Lmna	Prelamin-A/C;Lamin-A/C	yes	no	3	0.040308	40.798			By MS/MS
QAQIEVVPSASALIIK	VKLTIQNRQAQIEVVP	SASALIIKALKEPPRD	R	Q	A	I	K	A	3	0	0	0	0	2	1	0	0	3	1	1	0	0	1	2	0	0	0	2	0	0	16	0	1665.97	Q8C2K0;Q5BLK0;Q3TIQ2;P35979;Q6DI58	Q8C2K0	68	83	Rpl12	60S ribosomal protein L12	yes	no	2	0.00010721	100.13			By matching
QELAKKEIDVISVPSK	VRKRPLNKQELAKKEI	DVISVPSKCLLLVHEP	K	Q	E	S	K	C	1	0	0	1	0	1	2	0	0	2	1	3	0	0	1	2	0	0	0	2	0	0	16	2	1783.01	Q3UD72;Q3TTL2;Q8BU22;Q922S8	Q3UD72	267	282	Kif2c	Kinesin-like protein;Kinesin-like protein KIF2C	yes	no	2	0.003195	72.315		By MS/MS		By MS/MS
QESDQLVLNQHPASDK	EKELNKLKQESDQLVL	NQHPASDKIEAYMDTL	K	Q	E	D	K	I	1	0	1	2	0	3	1	0	1	0	2	1	0	0	1	2	0	0	0	1	0	0	16	0	1807.87	E9Q557;E9PZW0	E9Q557	343	358	Dsp	Desmoplakin	yes	no	3	5.5153e-06	142.45			By MS/MS
QGFIDLPEFPFGLEPR	YHTPDCGKQGFIDLPE	FPFGLEPRVATRWDIQ	K	Q	G	P	R	V	0	1	0	1	0	1	2	2	0	1	2	0	0	3	3	0	0	0	0	0	0	0	16	0	1860.94	O35490	O35490	259	274	Bhmt	Betaine--homocysteine S-methyltransferase 1	yes	yes	2	1.2417e-05	146.3	By matching	By MS/MS		By MS/MS	By MS/MS
QGGLGPMNIPLISDPK	AWINTPKKQGGLGPMN	IPLISDPKRTIAQDYG	K	Q	G	P	K	R	0	0	1	1	0	1	0	3	0	2	2	1	1	0	3	1	0	0	0	0	0	0	16	0	1635.87	P35700;B1AXW5;B1AXW6;B1AXW4	P35700	94	109	Prdx1	Peroxiredoxin-1	yes	no	2	6.0275e-05	102.72					By MS/MS
QIFQADVAMGAETRKR	SSRNKFIKQIFQADVA	MGAETRKRSPTLSSQF	K	Q	I	K	R	S	3	2	0	1	0	2	1	1	0	1	0	1	1	1	0	0	1	0	0	1	0	0	16	2	1819.94	A0A0U1RPX7;A0A0R4J113;Q5MJ56;P97479-2;P97479	A0A0U1RPX7	580	595	Myo7a	Unconventional myosin-VIIa	yes	no	3	0.010527	58.079	By matching		By MS/MS
SAPDFTATAVVDGAFK	SGNAQIGKSAPDFTAT	AVVDGAFKEIKLSDYR	K	S	A	F	K	E	4	0	0	2	0	0	0	1	0	0	0	1	0	2	1	1	2	0	0	2	0	0	16	0	1595.78	Q61171;D3Z4A4;Q5M9N9	Q61171	11	26	Prdx2	Peroxiredoxin-2	yes	no	2	0.0003389	91.355			By matching
SAYDSTMETMNYAQIR	LINFASLRSAYDSTME	TMNYAQIRTIAIIAEG	R	S	A	I	R	T	2	1	1	1	0	1	1	0	0	1	0	0	2	0	0	2	2	0	2	0	0	0	16	0	1879.81	Q3TED3;Q3V117;Q91V92;Q3UEA1;Q8VDM8	Q3TED3	567	582	Acly	ATP-citrate synthase	yes	no	2	6.0249e-21	213.67					By MS/MS
SCDLALLETYCATPAK	IVEECCFRSCDLALLE	TYCATPAKSERDVSTS	R	S	C	A	K	S	3	0	0	1	2	0	1	0	0	0	3	1	0	0	1	1	2	0	1	0	0	0	16	0	1811.84	D3Z4N4;E9QLW5;P09535	D3Z4N4	74	89	Igf2	Insulin-like growth factor II;Insulin-like growth factor II;Preptin	yes	no	2	7.0098e-07	169.37		By MS/MS		By MS/MS	By MS/MS
SLNNQIETLLTPEGSR	YEVDATLKSLNNQIET	LLTPEGSRKNPARTCR	K	S	L	S	R	K	0	1	2	0	0	1	2	1	0	1	3	0	0	0	1	2	2	0	0	0	0	0	16	0	1770.91	Q91VL4;Q3TP88;Q3TUE2;Q3TX57;Q3TU64;Q01149	Q91VL4	341	356	Col1a2	Collagen alpha-2(I) chain	yes	no	2;3	4.1152e-15	209.66	By MS/MS	By MS/MS	By matching	By MS/MS	By MS/MS
SPCSDTYCGPTPESEK	WCEVGASRSPCSDTYC	GPTPESEKETKALADF	R	S	P	E	K	E	0	0	0	1	2	0	2	1	0	0	0	1	0	0	3	3	2	0	1	0	0	0	16	0	1813.71	B2RS76	B2RS76	264	279	Cpb1		yes	yes	2	1.7443e-39	253.46	By MS/MS		By MS/MS
SWEDNQQGDEALDTTK	EVEDDYIKSWEDNQQG	DEALDTTKDPCQKVKC	K	S	W	T	K	D	1	0	1	3	0	2	2	1	0	0	1	1	0	0	0	1	2	1	0	0	0	0	16	0	1835.78	Q80U51;F6SLR4;Q9ER58;Q6PAN0	Q80U51	29	44	Spock2	Testican-2	yes	no	2	0.051383	47.548		By matching	By MS/MS	By matching	By matching
SYELPDGQVITIGNER	ASSSSLEKSYELPDGQ	VITIGNERFRCPEALF	K	S	Y	E	R	F	0	1	1	1	0	1	2	2	0	2	1	0	0	0	1	1	1	0	1	1	0	0	16	0	1789.88	Q3UAF7;Q3UAF6;Q3U5R4;B2RRX1;P60710;Q3UAA9;Q3UA89;Q3U939;Q3U804;Q3UGS0;Q61276;Q3TIJ9;Q3UCF8;E9Q1F2;E9Q5F4;Q61272;Q99NC5;Q6IWE2;A0A0U1RQ96;Q4KL81;P63260;Q3TSB7;Q8BFZ3;Q3UBP6;Q3UBQ4;Q9QZ83	Q3UAF7	239	254	Actb;Acta1;Actg1;Actbl2	Actin, cytoplasmic 1;Actin, cytoplasmic 1, N-terminally processed;Actin, cytoplasmic 2;Actin, cytoplasmic 2, N-terminally processed;Beta-actin-like protein 2	no	no	2;3	1.1267e-14	203.8	By MS/MS	By MS/MS	By MS/MS	By MS/MS	By MS/MS
TFVSITPAEVGVLVGK	VWAAVPGKTFVSITPA	EVGVLVGKDRSSFFVN	K	T	F	G	K	D	1	0	0	0	0	0	1	2	0	1	1	1	0	1	1	1	2	0	0	4	0	0	16	0	1615.92	Q5SX49;Q8CEH8;Q5SX50;P62962;Q3U7V7	Q5SX49	39	54	Pfn1	Profilin;Profilin-1	yes	no	2	5.7553e-05	103.6	By matching	By matching	By MS/MS		By MS/MS
TGAIVDVPVGEELLGR	KEGDVVKRTGAIVDVP	VGEELLGRVVDALGNA	R	T	G	G	R	V	1	1	0	1	0	0	2	3	0	1	2	0	0	0	1	0	1	0	0	3	0	0	16	0	1623.88	D3Z6F5;Q03265	D3Z6F5	84	99	Atp5a1	ATP synthase subunit alpha;ATP synthase subunit alpha, mitochondrial	yes	no	2	9.2408e-06	136.57
TITLEVEPSDTIENVK	FVKTLTGKTITLEVEP	SDTIENVKAKIQDKEG	K	T	I	V	K	A	0	0	1	1	0	0	3	0	0	2	1	1	0	0	1	1	3	0	0	2	0	0	16	0	1786.92	A5JUZ1;A0A0A6YW67;E9Q9J0;Q66JP1;Q8C2K3;Q642L7;E9Q4P0;E9Q5F6;Q922B0;E9QNP0;Q5SX22;Q3TH47;Q78XY9;Q6NZC5;Q8R0Z9;Q922Z8;Q8VC46;P62984;P62983;P0CG49;P0CG50;J3QK04	A5JUZ1	12	27	Ubc;Gm8797;Uba52;Gm1821;Rps27a;Kxd1;Ubb;Gm7808	Ubiquitin-60S ribosomal protein L40;Ubiquitin;60S ribosomal protein L40;Ubiquitin-40S ribosomal protein S27a;Ubiquitin;40S ribosomal protein S27a;Polyubiquitin-B;Ubiquitin;Polyubiquitin-C;Ubiquitin;Ubiquitin-related 1;Ubiquitin-related 2	yes	no	2;3	1.1846e-10	195.2	By MS/MS		By MS/MS		By MS/MS
TMDEMGQEIPSDAPWK	LDNNNLWRTMDEMGQE	IPSDAPWKAPLAEEWD	R	T	M	W	K	A	1	0	0	2	0	1	2	1	0	1	0	1	2	0	2	1	1	1	0	0	0	0	16	0	1833.79	Q8BW75;E9Q3X6	Q8BW75	121	136	Maob	Amine oxidase [flavin-containing] B	yes	no	2	0.0039474	70.197
TSSGLELQVVTSVPGR	TQVKEVKKTSSGLELQ	VVTSVPGRKPTTTMIP	K	T	S	G	R	K	0	1	0	0	0	1	1	2	0	0	2	0	0	0	1	3	2	0	0	3	0	0	16	0	1628.87	Q91Z57;Q3U9R7;Q3UB84;Q3UAS7;Q3TXK9;Q3TWI5;P47791-2;P47791	Q91Z57	154	169	Gsr	Glutathione reductase, mitochondrial	yes	no	2	0.0010045	83.54
TYFPHFDVSHGSAQVK	FASFPTTKTYFPHFDV	SHGSAQVKGHGKKVAD	K	T	Y	V	K	G	1	0	0	1	0	1	0	1	2	0	0	1	0	2	1	2	1	0	1	2	0	0	16	0	1818.87	Q9CY10;Q91VB8;Q8BPF4;A8DUV3;P01942;Q9QWJ3;Q9CY06;Q9CWS5;Q61287;A8DUV1;Q61649	Q9CY10	42	57	haemaglobin alpha 2;Hbat1;Hba	Hemoglobin subunit alpha	yes	no	3;4	0.0095173	53.565			By MS/MS
VAIVKPGVPMEIVLNK	DLGSESMKVAIVKPGV	PMEIVLNKESRRKTPV	K	V	A	N	K	E	1	0	1	0	0	0	1	1	0	2	1	2	1	0	2	0	0	0	0	4	0	0	16	1	1706.02	Q9JKR6;Q8VCI2;E0CYZ2	Q9JKR6	47	62	Hyou1	Hypoxia up-regulated protein 1	yes	no	3	0.0053433	62.861			By matching
VAVSADPNVPNVIVTR	YKEALLGRVAVSADPN	VPNVIVTRLTLVCSTA	R	V	A	T	R	L	2	1	2	1	0	0	0	0	0	1	0	0	0	0	2	1	1	0	0	5	0	0	16	0	1649.91	Q99PT1	Q99PT1	59	74	Arhgdia	Rho GDP-dissociation inhibitor 1	yes	yes	2	0.00033093	91.657			By MS/MS
VCTLAIIDPGDSDIIR	TACGKYYRVCTLAIID	PGDSDIIRSMPEQTGE	R	V	C	I	R	S	1	1	0	3	1	0	0	1	0	4	1	0	0	0	1	1	1	0	0	1	0	0	16	0	1756.9	Q497D7;Q5PR15;Q58DZ3;P62889	Q497D7	91	106	Rpl30	60S ribosomal protein L30	yes	no	2	0.00031182	92.38			By matching
VDATEESDLAQQYGVR	GSEIRLAKVDATEESD	LAQQYGVRGYPTIKFF	K	V	D	V	R	G	2	1	0	2	0	2	2	1	0	0	1	0	0	0	0	1	1	0	1	2	0	0	16	0	1779.83	Q3UDR2;Q3URP6;Q3U738;Q3TWE3;Q3TIM0;Q3THC3;Q3TF72;P09103;Q3TGS0;Q3UBY9;Q3UJA8;Q3UA23;Q3TT76	Q3UDR2	84	99	P4hb	Protein disulfide-isomerase	yes	no	2	5.884e-51	263.83			By MS/MS		By MS/MS
VEHEEKTRSFENYFQK	STKVEEFKVEHEEKTR	SFENYFQKHPQRCPPS	K	V	E	Q	K	H	0	1	1	0	0	1	4	0	1	0	0	2	0	2	0	1	1	0	1	1	0	0	16	2	2069.98	A2ASS6-3	A2ASS6-3	3881	3896	Ttn	Titin	yes	yes	2	0.0033739	73.386	By MS/MS	By MS/MS		By MS/MS
VITAFNDGLNHLDSLK	KVKAHGKKVITAFNDG	LNHLDSLKGTFASLSE	K	V	I	L	K	G	1	0	2	2	0	0	0	1	1	1	3	1	0	1	0	1	1	0	0	1	0	0	16	0	1755.92	A8DUK0;P02088;A8DUL5;A8DUP5;A8DUP7;A8DUM2;A8DUP3;A8DUK2;A8DUK7;A8DUK4;E9Q223;A8DUP0;A8DUQ5	A8DUK0	68	83	Hbbt1;Hbb-b1;Hbb-bs	Hemoglobin subunit beta-1	no	no	2;3	3.0306e-06	132.65	By matching		By MS/MS
VLNSQEALQPVHYEEK	KLCELYAKVLNSQEAL	QPVHYEEKNWCEEQYS	K	V	L	E	K	N	1	0	1	0	0	2	3	0	1	0	2	1	0	0	1	1	0	0	1	2	0	0	16	0	1882.94	Q8BW75	Q8BW75	371	386	Maob	Amine oxidase [flavin-containing] B	yes	yes	3	0.00017735	87.647
VSLDVNHFAPDELTVK	PDEWSQWRVSLDVNHF	APDELTVKTKEGVVEI	R	V	S	V	K	T	1	0	1	2	0	0	1	0	1	0	2	1	0	1	1	1	1	0	0	3	0	0	16	0	1782.92	Q9Z2L2	Q9Z2L2	20	35	Hspb1		yes	yes	3	2.0968e-05	105.53			By MS/MS
VTNGAFTGEISPGMIK	VAAQNCYKVTNGAFTG	EISPGMIKDLGATWVV	K	V	T	I	K	D	1	0	1	0	0	0	1	3	0	2	0	1	1	1	1	1	2	0	0	1	0	0	16	0	1620.82	P17751	P17751	120	135	Tpi1	Triosephosphate isomerase	yes	yes	2	0.017812	57.197
VVVAENFDDIVNEEDK	ESNEGPVKVVVAENFD	DIVNEEDKDVLIEFYA	K	V	V	D	K	D	1	0	2	3	0	0	3	0	0	1	0	1	0	1	0	0	0	0	0	4	0	0	16	0	1833.86	P27773	P27773	380	395	Pdia3	Protein disulfide-isomerase A3	yes	yes	2	7.3779e-06	157.58			By MS/MS
WNSMCVSCGNDIALVK	GDLFVHPKWNSMCVSC	GNDIALVKLSRSAQLG	K	W	N	V	K	L	1	0	2	1	2	0	0	1	0	1	1	1	1	0	0	2	0	1	0	2	0	0	16	0	1852.83	Q9CQ52	Q9CQ52	112	127	Cela3b	Chymotrypsin-like elastase family member 3B	yes	yes	2	9.2142e-06	128.82	By MS/MS	By MS/MS	By MS/MS
WNSQNVGNGYDIALIK	SKLVVHQRWNSQNVGN	GYDIALIKLASPVTLS	R	W	N	I	K	L	1	0	3	1	0	1	0	2	0	2	1	1	0	0	0	1	0	1	1	1	0	0	16	0	1790.9	P05208	P05208	113	128	Cela2a	Chymotrypsin-like elastase family member 2A	yes	yes	2	1.7132e-21	224.59		By MS/MS	By MS/MS		By matching
YADLTEDQLPSCESLK	SNISKDRRYADLTEDQ	LPSCESLKDTIARALP	R	Y	A	L	K	D	1	0	0	2	1	1	2	0	0	0	3	1	0	0	1	2	1	0	1	0	0	0	16	0	1867.85	Q3U7Z6;Q9DBJ1;Q6NWV5	Q3U7Z6	142	157	Pgam1	Phosphoglycerate mutase 1	yes	no	2	9.3798e-11	195.6					By MS/MS
YITGDQLGALYQDFVR	KSPADPSRYITGDQLG	ALYQDFVRNYPVVSIE	R	Y	I	V	R	N	1	1	0	2	0	2	0	2	0	1	2	0	0	1	0	0	1	0	2	1	0	0	16	0	1857.93	D3Z6E4;Q922A0;Q545V3;Q3UJ20;P17183;A0A0N4SUX5	D3Z6E4	151	166	Eno2	Enolase;Gamma-enolase	yes	no	2	0.0056411	68.481					By MS/MS
YPIEHGIITNWDDMEK	KRGILTLKYPIEHGII	TNWDDMEKIWHHTFYN	K	Y	P	E	K	I	0	0	1	2	0	0	2	1	1	3	0	1	1	0	1	0	1	1	1	0	0	0	16	0	1959.9	Q3UBP6;Q3UBQ4	Q3UBP6	69	84	Actb		no	no	2;3	2.8939e-39	248.67	By MS/MS	By MS/MS	By MS/MS	By MS/MS	By MS/MS
AALAPYNWPVWLGVHDR	DALSRYLRAALAPYNW	VWLGVHDRRSEGLYLF	R	A	A	D	R	R	3	1	1	1	0	0	0	1	1	0	2	0	0	0	2	0	0	2	1	2	0	0	17	0	1964.01	O88200	O88200	234	250	Clec11a	C-type lectin domain family 11 member A	yes	yes	3	8.454e-06	160.81	By matching	By MS/MS		By MS/MS	By MS/MS
ADALQAGASQFETSAAK	KLSELDDRADALQAGA	QFETSAAKLKRKYWWK	R	A	D	A	K	L	6	0	0	1	0	2	1	1	0	0	1	1	0	1	0	2	1	0	0	0	0	0	17	0	1664.8	Q8CHR4;O35619;B0QZN5;P63024;P63044	Q8CHR4	67	83	Vamp2;Vamp3	Vesicle-associated membrane protein 3;Vesicle-associated membrane protein 2	yes	no	2	3.6252e-05	97.502
AEDGSVIDYELIDQDAR	VALAKGRRAEDGSVID	ELIDQDARELYDAGVK	R	A	E	A	R	E	2	1	0	4	0	1	2	1	0	2	1	0	0	0	0	1	0	0	1	1	0	0	17	0	1907.87	Q542G9;P07356;Q3UCD3;Q9CZI7;B0V2N7;Q99KH3;B0V2N5	Q542G9	180	196	Anxa2	Annexin;Annexin A2	yes	no	2	2.2841e-05	152.37			By MS/MS
AGAAAGGPATLAVCVCK	SRKRRRGKAGAAAGGP	TLAVCVCKSRYPVCGS	K	A	G	C	K	S	6	0	0	0	2	0	0	3	0	0	1	1	0	0	1	0	1	0	0	2	0	0	17	0	1572.78	Q3U131;Q811C8;A0A5E1;Q3UFA6;F8WH23;Q61581;E9Q5D9	Q3U131	69	85	Igfbp7	Insulin-like growth factor-binding protein 7	yes	no	2	0.022669	53.565			By MS/MS
AGKPVICATQMLESMIK	MMIGRCNRAGKPVICA	QMLESMIKKPRPTRAE	R	A	G	I	K	K	2	0	0	0	1	1	1	1	0	2	1	2	2	0	1	1	1	0	0	1	0	0	17	1	1875.96	P52480;P52480-2	P52480	320	336	Pkm	Pyruvate kinase PKM	no	no	2;3	1.4922e-05	135.55	By matching				By MS/MS
AIVAIENPADVSVISSR	EKLLLAARAIVAIENP	DVSVISSRNTGQRAVL	R	A	I	S	R	N	3	1	1	1	0	0	1	0	0	3	0	0	0	0	1	3	0	0	0	3	0	0	17	0	1739.94	B2CY77;P14206	B2CY77	64	80	Rpsa	40S ribosomal protein SA	yes	no	2	5.0903e-08	132.84			By MS/MS
AKQEEKEEEEEEEAVAR	SAQQQARKAKQEEKEE	EEEEAVAREKAGPEEV	K	A	K	A	R	E	3	1	0	0	0	1	9	0	0	0	0	2	0	0	0	0	0	0	0	1	0	0	17	2	2031.92	P26339;Q3UN28	P26339	233	249	Chga	Chromogranin-A;Pancreastatin;Beta-granin;WE-14;Catestatin;GE-25;Serpinin-RRG;Serpinin;p-Glu serpinin precursor	yes	no	2	3.0239e-68	257.02					By MS/MS
ALESPERPFLAILGGAK	KELNYFAKALESPERP	LAILGGAKVADKIQLI	K	A	L	A	K	V	3	1	0	0	0	0	2	2	0	1	3	1	0	1	2	1	0	0	0	0	0	0	17	1	1767.99	P09411;S4R2M7	P09411	200	216	Pgk1	Phosphoglycerate kinase 1;Phosphoglycerate kinase	yes	no	3	8.1182e-05	99.344	By matching
AVCMLSNTTAIAEAWAR	GDLAKVQRAVCMLSNT	AIAEAWARLDHKFDLM	R	A	V	A	R	L	5	1	1	0	1	0	1	0	0	1	1	0	1	0	0	1	2	1	0	1	0	0	17	0	1863.9	P05213;Q99KA2;P68369;Q52L87;Q3TIZ0;P68373;Q5FW91;P05214;Q9D9Y2;Q9JJZ2;A0A0A0MQA5;P68368	P05213	374	390	Tuba1b;Tuba1a;Tuba1c;Tuba3a;Tuba8;Tuba4a	Tubulin alpha-1B chain;Tubulin alpha-1A chain;Tubulin alpha-1C chain;Tubulin alpha-3 chain;Tubulin alpha-8 chain;Tubulin alpha-4A chain	no	no	2	2.1492e-14	203.04				By matching
CDRVDQLTAQLADLAAR	YRQDLLAKCDRVDQLT	QLADLAARGEGESPQA	K	C	D	A	R	G	4	2	0	3	1	2	0	0	0	0	3	0	0	0	0	0	1	0	0	1	0	0	17	1	1914.96	Q64727	Q64727	545	561	Vcl	Vinculin	yes	yes	2;3	0.00010731	96.805				By MS/MS	By matching
DDDIAALVVDNGSGMCK	________________	DNGSGMCKAGFAGDDA	M	D	D	C	K	A	2	0	1	4	1	0	0	2	0	1	1	1	1	0	0	1	0	0	0	2	0	0	17	0	1778.78	Q3UAF7;Q3UAF6;Q3U5R4;B2RRX1;P60710;Q3UAA9;Q3UA89;Q3UGS0;Q61276;Q3TIJ9;E9Q1F2;E9Q5F4;E9Q2D1;Q3UBP6	Q3UAF7	2	18	Actb	Actin, cytoplasmic 1;Actin, cytoplasmic 1, N-terminally processed	no	no	2	8.7616e-30	238.02	By MS/MS	By MS/MS	By MS/MS	By MS/MS	By MS/MS
DEPSVAAMVYPFTGDHK	DFDYVCSRDEPSVAAM	YPFTGDHKQKFYWGHK	R	D	E	H	K	Q	2	0	0	2	0	0	1	1	1	0	0	1	1	1	2	1	1	0	1	2	0	0	17	0	1862.85	Q3TED3;Q3V117;Q91V92;Q3UEA1;Q8VDM8	Q3TED3	512	528	Acly	ATP-citrate synthase	yes	no	2;3	1.6626e-09	185.14					By matching
DMMELVQPSISGVDLDK	PEVDGFVKDMMELVQP	ISGVDLDKFREILLRH	K	D	M	D	K	F	0	0	0	3	0	1	1	1	0	1	2	1	2	0	1	2	0	0	0	2	0	0	17	0	1875.9	Q91WD9	Q91WD9	228	244	Scgn	Secretagogin	yes	yes	2	0.0023681	74.428
DRDVTFSPATIEEELIK	GRFYQDLKDRDVTFSP	TIEEELIKFCREARGK	K	D	R	I	K	F	1	1	0	2	0	0	3	0	0	2	1	1	0	1	1	1	2	0	0	1	0	0	17	1	1961.99	Q80ZP8;A8C1V1;Q3TMX5;F6USD5;F6T4L3;Q9CXI5	Q80ZP8	29	45	Manf	Mesencephalic astrocyte-derived neurotrophic factor	yes	no	3	4.2542e-05	106.31					By MS/MS
DSSCGTGYELTEDNNCK	VGSFRCQRDSSCGTGY	LTEDNNCKDIDECETG	R	D	S	C	K	D	0	0	2	2	2	0	2	2	0	0	1	1	0	0	0	2	2	0	1	0	0	0	17	0	1948.74	Q3TWK8;B2CQD6;Q08879;Q08879-2	Q3TWK8	247	263	Fbln1	Fibulin-1	yes	no	2	8.8987e-51	268.41
DVDIDSYPDEELPCSAR	GDGYVCGKDVDIDSYP	EELPCSARNCKKDNCK	K	D	V	A	R	N	1	1	0	4	1	0	2	0	0	1	1	0	0	0	2	2	0	0	1	1	0	0	17	0	1979.84	B2RTL6;Q9Z1T2	B2RTL6	466	482	Thbs4	Thrombospondin-4	yes	no	2	3.5589e-10	194.58	By MS/MS	By MS/MS		By MS/MS	By MS/MS
EAFSLFDKDGDGTITTK	EEQIAEFKEAFSLFDK	GDGTITTKELGTVMRS	K	E	A	T	K	E	1	0	0	3	0	0	1	2	0	1	1	2	0	2	0	1	3	0	0	0	0	0	17	1	1843.88	P62204;Q3UKW2	P62204	15	31	Calm1	Calmodulin	yes	no	2;3	1.3552e-20	224.15					By MS/MS
EEEIAALVIDNGSGMCK	________________	DNGSGMCKAGFAGDDA	M	E	E	C	K	A	2	0	1	1	1	0	3	2	0	2	1	1	1	0	0	1	0	0	0	1	0	0	17	0	1834.84	Q4KL81;P63260;Q3TSB7;Q3UD81;G3UYG0;B1ATY1;Q9QZ83	Q4KL81	2	18	Actg1	Actin, cytoplasmic 2;Actin, cytoplasmic 2, N-terminally processed	no	no	2	2.3819e-10	193.77	By MS/MS	By MS/MS		By MS/MS	By MS/MS
EGGLGPLNIPLLADVTK	AWINTPRKEGGLGPLN	PLLADVTKSLSQNYGV	K	E	G	T	K	S	1	0	1	1	0	0	1	3	0	1	4	1	0	0	2	0	1	0	0	1	0	0	17	0	1705.96	Q61171;D3Z4A4	Q61171	93	109	Prdx2	Peroxiredoxin-2	yes	no	2	0.00042476	88.385		By matching			By matching
ESGTTASNVWTGLHDPK	NFVASLVKESGTTASN	WTGLHDPKSNRRWHWS	K	E	S	P	K	S	1	0	1	1	0	0	1	2	1	0	1	1	0	0	1	2	3	1	0	1	0	0	17	0	1798.85	Q545J0;Q08731;A0A0N4SVN9	Q545J0	97	113	Reg2	Lithostathine-2	yes	no	3	0.048672	29.973			By MS/MS
ESGTTDANVWTGLHDPK	NFVASLIKESGTTDAN	WTGLHDPKRNRRWHWS	K	E	S	P	K	R	1	0	1	2	0	0	1	2	1	0	1	1	0	0	1	1	3	1	0	1	0	0	17	0	1826.84	Q8C6F9;Q3TV26;P43137	Q8C6F9	50	66	Reg1	Lithostathine-1	yes	no	3	0.028124	43.794		By MS/MS	By MS/MS
FSKDYEMQKINEEDFQK	AQHTHQVRFSKDYEMQ	INEEDFQKLVVRWEEE	R	F	S	Q	K	L	0	0	1	2	0	2	3	0	0	1	0	3	1	2	0	1	0	0	1	0	0	0	17	2	2177.99	Q3V0F6	Q3V0F6	253	269	Gm7337		yes	yes	3	0.042651	48.216	By matching		By matching
GDEEGIPAVVIDMSGLR	LLEQVAPKGDEEGIPA	VIDMSGLREKDDIQRA	K	G	D	L	R	E	1	1	0	2	0	0	2	3	0	2	1	0	1	0	1	1	0	0	0	2	0	0	17	0	1756.87	Q3U9M7;Q3U6Z1;Q3U6N7;Q3TJX0;Q61233	Q3U9M7	310	326	Lcp1	Plastin-2	yes	no	2	0.0029644	70.802				By matching	By MS/MS
GEMMDLQHGSLFLQTPK	DVLEDKLKGEMMDLQH	SLFLQTPKIVADKDYS	K	G	E	P	K	I	0	0	0	1	0	2	1	2	1	0	3	1	2	1	1	1	1	0	0	0	0	0	17	0	1930.93	P16125;D3Z7F0	P16125	61	77	Ldhb	L-lactate dehydrogenase B chain;L-lactate dehydrogenase	yes	no	3	0.0020118	69.979	By MS/MS		By matching
GENHCGIESEIVAGIPR	NGFFKILRGENHCGIE	EIVAGIPRTDQYWGRF	R	G	E	P	R	T	1	1	1	0	1	0	3	3	1	3	0	0	0	0	1	1	0	0	0	1	0	0	17	0	1836.88	Q3TVS6;Q3TC17;P10605	Q3TVS6	315	331	Ctsb	Cathepsin B;Cathepsin B light chain;Cathepsin B heavy chain	yes	no	3	3.062e-05	109.04			By matching
GFFDPNTEENLTYLQLK	SDPSDDTKGFFDPNTE	NLTYLQLKERCIKDEE	K	G	F	L	K	E	0	0	2	1	0	1	2	1	0	0	3	1	0	2	1	0	2	0	1	0	0	0	17	0	2027.98	E9Q557;E9PZW0;Q8BP77	E9Q557	2426	2442	Dsp	Desmoplakin	yes	no	2	2.3697e-05	117	By MS/MS				By matching
GLGPIEEDTILVIDPNK	SKFVYQQRGLGPIEED	ILVIDPNKAEILQSSG	R	G	L	N	K	A	0	0	1	2	0	0	2	2	0	3	2	1	0	0	2	0	1	0	0	1	0	0	17	0	1821.97	E9Q704;F8VQA4;P97467;Q3V1A8	E9Q704	447	463	Pam	Peptidyl-glycine alpha-amidating monooxygenase;Peptidylglycine alpha-hydroxylating monooxygenase;Peptidyl-alpha-hydroxyglycine alpha-amidating lyase	yes	no	2	0.0016244	78.95	By MS/MS		By MS/MS
GSTAPVGGGSFPTITPR	LRELSFGRGSTAPVGG	SFPTITPREPWDGKDG	R	G	S	P	R	E	1	1	0	0	0	0	0	4	0	1	0	0	0	1	3	2	3	0	0	1	0	0	17	0	1600.82	Q3THH1;Q922R8;Q3TML0;Q3TJL8	Q3THH1	398	414	Pdia6	Protein disulfide-isomerase A6	yes	no	2	4.2069e-05	139.49			By matching		By MS/MS
GVNLPGAAVDLPAVSEK	GGSLGSKKGVNLPGAA	DLPAVSEKDIQDLKFG	K	G	V	E	K	D	3	0	1	1	0	0	1	2	0	0	2	1	0	0	2	1	0	0	0	3	0	0	17	0	1635.88	P52480;P52480-2	P52480	208	224	Pkm	Pyruvate kinase PKM	no	no	2	5.746e-05	93.371
HNQLPLVIEFTEQTAPK	EKLLDFIKHNQLPLVI	FTEQTAPKIFGGEIKT	K	H	N	P	K	I	1	0	1	0	0	2	2	0	1	1	2	1	0	1	2	0	2	0	0	1	0	0	17	0	1964.04	Q3UDR2;Q3URP6;Q3U738;Q3TWE3;Q3TIM0;Q3THC3;Q3TF72;P09103;Q3TGS0;Q3UBY9;Q3UJA8;Q3UA23;Q3TT76	Q3UDR2	233	249	P4hb	Protein disulfide-isomerase	yes	no	2;3	3.0217e-14	198.98		By MS/MS	By MS/MS		By MS/MS
HPNYNSWTLDNDIMLIK	VDSAKIIRHPNYNSWT	DNDIMLIKLASPVTLN	R	H	P	I	K	L	0	0	3	2	0	0	0	0	1	2	2	1	1	0	1	1	1	1	1	0	0	0	17	0	2073	Q792Y6;P07146	Q792Y6	96	112	Prss2	Anionic trypsin-2	yes	no	3	0.0043132	62.94	By MS/MS
HQSLGGQYGVQGFPTIK	VGAVNADKHQSLGGQY	VQGFPTIKIFGANKNK	K	H	Q	I	K	I	0	0	0	0	0	3	0	4	1	1	1	1	0	1	1	1	1	0	1	1	0	0	17	0	1815.93	Q3THH1;Q922R8;Q3TML0;Q3TJL8;Q9DAB4	Q3THH1	91	107	Pdia6	Protein disulfide-isomerase A6	yes	no	3	1.0241e-05	129.05			By matching
IAPALISSGISVVEQEK	AVDHINSRIAPALISS	ISVVEQEKLDNLMLEL	R	I	A	E	K	L	2	0	0	0	0	1	2	1	0	3	1	1	0	0	1	3	0	0	0	2	0	0	17	0	1739.97	D3Z6E4;Q922A0;Q545V3;Q3UJ20;P17183;D3YVD3;D3Z2S4	D3Z6E4	73	89	Eno2	Enolase;Gamma-enolase	yes	no	2	0.0026962	72.433			By matching
IINEPTAAAIAYGLDKK	IAGLNVLRIINEPTAA	IAYGLDKKVGAERNVL	R	I	I	K	K	V	4	0	1	1	0	0	1	1	0	3	1	2	0	0	1	0	1	0	1	0	0	0	17	1	1786.98	Q3UBA6;Q3TZJ3;Q3TH56;Q3TEK2;P63017;Q504P4;Q3U9L2;Q3TF16;Q3TQ13;Q3UDS0;Q3ULM1;Q3TB63;Q3KQJ4;Q3TH04;B7U582;P17156	Q3UBA6	172	188	Hspa8;Hspa2	Heat shock cognate 71 kDa protein;Heat shock-related 70 kDa protein 2	yes	no	3	0.0031375	65.808					By MS/MS
IINEPTAAAIAYGLDKR	IAGLNVMRIINEPTAA	IAYGLDKREGEKNILV	R	I	I	K	R	E	4	1	1	1	0	0	1	1	0	3	1	1	0	0	1	0	1	0	1	0	0	0	17	1	1814.99	Q3U9G2;Q3TWF2;P20029;Q9DC41;Q3TKF8;Q3TI47;Q3U7T8;Q3U6V3;Q3UEM8	Q3U9G2	199	215	Hspa5	78 kDa glucose-regulated protein	yes	no	3	4.516e-05	103.88		By MS/MS		By MS/MS	By MS/MS
IQEITEQLDITTSEYEK	DKAHIEKRIQEITEQL	ITTSEYEKEKLNERLA	R	I	Q	E	K	E	0	0	0	1	0	2	4	0	0	3	1	1	0	0	0	1	3	0	1	0	0	0	17	0	2038.99	P63038;P63038-2	P63038	371	387	Hspd1	60 kDa heat shock protein, mitochondrial	yes	no	2	0.0048004	68.41			By matching
IVSNASCTTNCLAPLAK	EKYDNSLKIVSNASCT	NCLAPLAKVIHDNFGI	K	I	V	A	K	V	3	0	2	0	2	0	0	0	0	1	2	1	0	0	1	2	2	0	0	1	0	0	17	0	1818.9	S4R257;D2KHZ9;A0A0A0MQF6;P16858;D3YYI5;Q6IWE3;V9GXA7	S4R257	101	117	Gapdh;GAPDH;Gm7293;Gapd;Gm15294	Glyceraldehyde-3-phosphate dehydrogenase	yes	no	2	1.867e-06	170.35					By matching
KDDPVTNLNNAFEVAEK	LIEYDKLRKDDPVTNL	NAFEVAEKYLDIPKML	R	K	D	E	K	Y	2	0	3	2	0	0	2	0	0	0	1	2	0	1	1	0	1	0	0	2	0	0	17	1	1902.93	Q1A602;Q3ULT2;Q3UDJ7;P57780;E9Q2W9;D3Z0L8	Q1A602	217	233	Actn4	Alpha-actinin-4	yes	no	3	0.01907	48.51
KEETMTCLFFSQTFCEK	KDCILFTKKEETMTCL	FSQTFCEKEGLTEVVV	K	K	E	E	K	E	0	0	0	0	2	1	3	0	0	0	1	2	1	3	0	1	3	0	0	0	0	0	17	1	2184.95	Q9WVL5	Q9WVL5	119	135	Morc1	MORC family CW-type zinc finger protein 1	yes	yes	3	0.0039072	64.565		By MS/MS		By MS/MS
LAMQEFMILPVGASSFR	GGSHAGNKLAMQEFMI	PVGASSFREAMRIGAE	K	L	A	F	R	E	2	1	0	0	0	1	1	1	0	1	2	0	2	2	1	2	0	0	0	1	0	0	17	0	1895.96	Q5FW97;P17182;Q6PHC1;Q8CF78;B0QZL1	Q5FW97	163	179	EG433182;Eno1	Alpha-enolase;Enolase	yes	no	2	0.00068649	84.653					By MS/MS
LFDSDPITVVLPEEVSK	RVTEVVVKLFDSDPIT	VLPEEVSKDNPKFMDT	K	L	F	S	K	D	0	0	0	2	0	0	2	0	0	1	2	1	0	1	2	2	1	0	0	3	0	0	17	0	1886.99	Q9JK98;Q549A5;Q06890	Q9JK98	332	348	Clu	Clusterin;Clusterin;Clusterin beta chain;Clusterin alpha chain	yes	no	2	0.00073223	84.375
LGFSEVELVQMVVDGVK	FDVSNADRLGFSEVEL	QMVVDGVKLLIEMEQR	R	L	G	V	K	L	0	0	0	1	0	1	2	2	0	0	2	1	1	1	0	1	0	0	0	5	0	0	17	0	1847.97	Q04447	Q04447	342	358	Ckb	Creatine kinase B-type	yes	yes	3	0.00017244	88.385					By MS/MS
LGSTCLASGWGSITPVK	DLPTEEPKLGSTCLAS	WGSITPVKYEYPDELQ	K	L	G	V	K	Y	1	0	0	0	1	0	0	3	0	1	2	1	0	0	1	3	2	1	0	1	0	0	17	0	1732.88	A0A0B6VSQ6;P15947;A0A0U1RPN5	A0A0B6VSQ6	148	164	Klk1	Kallikrein-1	yes	no	2	0.035709	50.831			By matching
LLEEYMVLEMAQKQSMK	ADKKQIEKLLEEYMVL	MAQKQSMKESAHLGWE	K	L	L	M	K	E	1	0	0	0	0	2	3	0	0	0	3	2	3	0	0	1	0	0	1	1	0	0	17	1	2070.02	Q80XQ1;Q6VGS5;Q6VGS5-2	Q80XQ1	411	427	Ccdc88c	Protein Daple	yes	no	3	0.016368	50.305			By MS/MS
LQSLLQKELQSHPLQAK	NAFRLFPKLQSLLQKE	QSHPLQAKSAQGSAGE	K	L	Q	A	K	S	1	0	0	0	0	4	1	0	1	0	5	2	0	0	1	2	0	0	0	0	0	0	17	1	1960.11	D3YXH9;E9QL22;Q3U1C6-2;Q3U1C6	D3YXH9	264	280	Tatdn3	Putative deoxyribonuclease TATDN3	yes	no	2	0.0031806	73.296	By MS/MS	By MS/MS	By MS/MS	By MS/MS	By MS/MS
MDPLQEANGTFALNLLK	________________	TFALNLLKILGEDSSK	-	M	D	L	K	I	2	0	2	1	0	1	1	1	0	0	4	1	1	1	1	0	1	0	0	0	0	0	17	0	1873.96	Q4FJQ6;Q3U3L3;Q60854;E9Q5Q5;E9PZQ9;E9Q4R2;E9PYY0;E9Q3Y1;Q8BZR2;E9Q6X2;E9Q108;E9Q0P9;K7E6F1	Q4FJQ6	1	17	Serpinb6a;Serpinb6	Serpin B6	yes	no	2	0.010463	54.004					By matching
MEEIVEGCTGALHILAR	QPYTDGVRMEEIVEGC	GALHILARDPMNRMEI	R	M	E	A	R	D	2	1	0	0	1	0	3	2	1	2	2	0	1	0	0	0	1	0	0	1	0	0	17	0	1897.94	Q02257;F7CRC6;Q80VE7;Q3UZT7;Q02248;F7BAC9	Q02257	556	572	Jup;Ctnnb1	Junction plakoglobin;Catenin beta-1	yes	no	3	6.2285e-05	100.43	By matching		By MS/MS
MLDYLQGSGETPQTDIR	AGKTLFGKMLDYLQGS	ETPQTDIRWMSESGII	K	M	L	I	R	W	0	1	0	2	0	2	1	2	0	1	2	0	1	0	1	1	2	0	1	0	0	0	17	0	1922.9	Q3UE86;A1A4T2;Q8BHN3;Q8BHN3-2;Q8BHN3-3	Q3UE86	360	376	Ganab	Neutral alpha-glucosidase AB	yes	no	2	0.013234	60.489
NALSQIVDIDGIWSGTR	QYMPGCKKNALSQIVD	DGIWSGTRDFVACNHL	K	N	A	T	R	D	1	1	1	2	0	1	0	2	0	3	1	0	0	0	0	2	1	1	0	1	0	0	17	0	1843.94	Q5BKQ4	Q5BKQ4	258	274	Pnliprp1	Inactive pancreatic lipase-related protein 1	yes	yes	2	0.0090124	64.454			By MS/MS
NAPAIIFIDELDAIAPK	KAFEEAEKNAPAIIFI	ELDAIAPKREKTHGEV	K	N	A	P	K	R	4	0	1	2	0	0	1	0	0	4	1	1	0	1	2	0	0	0	0	0	0	0	17	0	1809.99	Q01853;Q8BNF8	Q01853	296	312	Vcp	Transitional endoplasmic reticulum ATPase	yes	no	2;3	0.00010693	104.2					By MS/MS
NILSQIVDIDGIWEGTR	IEMPGCQKNILSQIVD	DGIWEGTRNFAACNHL	K	N	I	T	R	N	0	1	1	2	0	1	1	2	0	4	1	0	0	0	0	1	1	1	0	1	0	0	17	0	1928	Q6P8U6	Q6P8U6	257	273	Pnlip	Pancreatic triacylglycerol lipase	yes	yes	2;3	4.2471e-10	189.59	By MS/MS	By MS/MS		By matching	By matching
NMAEQIIQEIYSQVQSK	WHGKPLPKNMAEQIIQ	IYSQVQSKKKILATPP	K	N	M	S	K	K	1	0	1	0	0	4	2	0	0	3	0	1	1	0	0	2	0	0	1	1	0	0	17	0	2007.99	P40142	P40142	265	281	Tkt	Transketolase	yes	yes	3	2.3525e-10	192.96					By MS/MS
QAAPCVLFFDELDSIAK	REIFDKARQAAPCVLF	DELDSIAKARGGNIGD	R	Q	A	A	K	A	3	0	0	2	1	1	1	0	0	1	2	1	0	2	1	1	0	0	0	1	0	0	17	0	1922.94	Q01853;Q8BNF8	Q01853	568	584	Vcp	Transitional endoplasmic reticulum ATPase	yes	no	2;3	0.0039724	69.188					By MS/MS
QHFPATPLLDYALEVEK	QILKDFVKQHFPATPL	DYALEVEKITTSKKPN	K	Q	H	E	K	I	2	0	0	1	0	1	2	0	1	0	3	1	0	1	2	0	1	0	1	1	0	0	17	0	1970.01	Q3TED3;Q3V117;Q91V92;Q3UEA1;Q8VDM8;Q3UVY4;Q99K05;Q6P063	Q3TED3	986	1002	Acly	ATP-citrate synthase	yes	no	2;3	8.2366e-07	169.4	By matching				By MS/MS
QLQAASPEFTQAAIMEK	AARTKVIRQLQAASPE	TQAAIMEKLVAYTSDQ	R	Q	L	E	K	L	4	0	0	0	0	3	2	0	0	1	1	1	1	1	1	1	1	0	0	0	0	0	17	0	1861.92	Q5SUV8;O88533;Q5SUV9	Q5SUV8	166	182	Ddc	Aromatic-L-amino-acid decarboxylase	yes	no	2	2.1191e-10	149.31			By matching		By MS/MS
QRCQELDMQVTTLQDEK	IAEKEELKQRCQELDM	VTTLQDEKNSLVSENE	K	Q	R	E	K	N	0	1	0	2	1	4	2	0	0	0	2	1	1	0	0	0	2	0	0	1	0	0	17	1	2120.98	Q8BIL5-2;Q8BIL5	Q8BIL5-2	199	215	Hook1	Protein Hook homolog 1	yes	no	3	0.009121	55.011		By MS/MS
SCALANNFARSFALMLR	LPAGEEERSCALANNF	RSFALMLRYNGPPPT_	R	S	C	L	R	Y	4	2	2	0	1	0	0	0	0	0	3	0	1	2	0	2	0	0	0	0	0	0	17	1	1940.97	Q4FZC9-2;Q4FZC9	Q4FZC9-2	865	881	Syne3	Nesprin-3	yes	no	2	0.013518	58.885		By matching		By MS/MS	By matching
SCVCAVGWAGNGLLCGR	VLERDGSRSCVCAVGW	GNGLLCGRDTDLDGFP	R	S	C	G	R	D	2	1	1	0	3	0	0	4	0	0	2	0	0	0	0	1	0	1	0	2	0	0	17	0	1835.82	Q8VI54;Q9R0G6;A1A557;A2VCQ0	Q8VI54	250	266	Comp	Cartilage oligomeric matrix protein	yes	no	2;3	8.8382e-40	256.57	By matching	By MS/MS	By matching	By MS/MS	By MS/MS
SIVDLYTGNVEDDADTK	KVAPYFERSIVDLYTG	VEDDADTKTLLLSIFQ	R	S	I	T	K	T	1	0	1	4	0	0	1	1	0	1	1	1	0	0	0	1	2	0	1	2	0	0	17	0	1853.85	Q14DR9;Q8R2E9	Q14DR9	324	340	Ero1lb	ERO1-like protein beta	yes	no	2	8.0986e-06	164.01			By MS/MS		By MS/MS
SPPFDNQLNVEDADSTK	EKERQSIRSPPFDNQL	VEDADSTKNRKLIDEY	R	S	P	T	K	N	1	0	2	3	0	1	1	0	0	0	1	1	0	1	2	2	1	0	0	1	0	0	17	0	1875.85	P47867;P47867-2	P47867	99	115	Scg3	Secretogranin-3	yes	no	2	4.8974e-05	143.46	By MS/MS		By MS/MS
SQIFSTASDNQPTVTIK	NTVVPTKKSQIFSTAS	NQPTVTIKVYEGERPL	K	S	Q	I	K	V	1	0	1	1	0	2	0	0	0	2	0	1	0	1	1	3	3	0	0	1	0	0	17	0	1835.93	Q3U9G2;Q3TWF2;P20029;Q9DC41;Q3TKF8;Q3TI47;Q3U7T8;Q3UEM8;Q3TUS2	Q3U9G2	449	465	Hspa5	78 kDa glucose-regulated protein	yes	no	2;3	0.00010247	104.88			By MS/MS
SVQNDSQALAEVLNQLK	TVKINELKSVQNDSQA	AEVLNQLKDMLANFRG	K	S	V	L	K	D	2	0	2	1	0	3	1	0	0	0	3	1	0	0	0	2	0	0	0	2	0	0	17	0	1855.96	E9Q557;E9PZW0	E9Q557	723	739	Dsp	Desmoplakin	yes	no	2;3	8.1871e-06	124.25	By MS/MS		By MS/MS
TCGLCGDFNIFAEDDFR	MSDRHFNKTCGLCGDF	IFAEDDFRTQEGTLTS	K	T	C	F	R	T	1	1	1	3	2	0	1	2	0	1	1	0	0	3	0	0	1	0	0	0	0	0	17	0	2035.84	Q3TPE1;Q3TD35;Q3U017;Q2I0J8;Q2I0J7;E9QPU1;Q8CIZ8-2;Q8CIZ8	Q3TPE1	161	177	Vwf	von Willebrand factor;von Willebrand antigen 2	yes	no	2	0.00035868	91.317	By MS/MS	By matching		By matching	By matching
TLASLSPETSLFIIASK	IDGTHIAKTLASLSPE	SLFIIASKTFTTQETI	K	T	L	S	K	T	2	0	0	0	0	0	1	0	0	2	3	1	0	1	1	4	2	0	0	0	0	0	17	0	1776.99	B7ZWL9;B2RXT5;P06745	B7ZWL9	195	211	Gpi1;Gpi	Glucose-6-phosphate isomerase	yes	no	2	2.9772e-05	116.06					By MS/MS
TMQALEFHTVPVEVLAK	HQALFQRKTMQALEFH	VPVEVLAKYKGLNLTE	K	T	M	A	K	Y	2	0	0	0	0	1	2	0	1	0	2	1	1	1	1	0	2	0	0	3	0	0	17	0	1912.01	Q07797	Q07797	377	393	Lgals3bp	Galectin-3-binding protein	yes	yes	3	0.00011921	94.203					By matching
TPDKLQQAALPIVSEAK	KTKYNALKTPDKLQQA	LPIVSEAKCKESWGSK	K	T	P	A	K	C	3	0	0	1	0	2	1	0	0	1	2	2	0	0	2	1	1	0	0	1	0	0	17	1	1808	Q9CR35	Q9CR35	169	185	Ctrb1	Chymotrypsinogen B;Chymotrypsin B chain A;Chymotrypsin B chain B;Chymotrypsin B chain C	yes	yes	2;3	1.3721e-62	282.57		By MS/MS		By matching
TSIDAYDNFDNISLAQR	EEDYQALRTSIDAYDN	DNISLAQRLEKHELIE	R	T	S	Q	R	L	2	1	2	3	0	1	0	0	0	2	1	0	0	1	0	2	1	0	1	0	0	0	17	0	1941.91	Q5SXR6;Q68FD5;Q80U89;Q3UPJ3;Q8K2I5;F6Z1R4;Q3TJ98	Q5SXR6	1486	1502	Cltc;mKIAA0034	Clathrin heavy chain;Clathrin heavy chain 1	yes	no	2	0.00010693	104.2
VADYMNHLIDIGVAGFR	EKDYVRTKVADYMNHL	DIGVAGFRLDAAKHMW	K	V	A	F	R	L	2	1	1	2	0	0	0	2	1	2	1	0	1	1	0	0	0	0	1	2	0	0	17	0	1889.95	Q8C5B4;E9PV85;Q61297;P00688	P00688	191	207	Amy2a1;Amy2	Alpha-amylase;Pancreatic alpha-amylase	no	no	2;3	7.7429e-21	214.5	By MS/MS	By MS/MS	By MS/MS	By MS/MS	By MS/MS
VIVVGNPANTNCLTASK	KYAKKSVKVIVVGNPA	TNCLTASKSAPSIPKE	K	V	I	S	K	S	2	0	3	0	1	0	0	1	0	1	1	1	0	0	1	1	2	0	0	3	0	0	17	0	1756.91	P14152;B1ATQ3	P14152	126	142	Mdh1	Malate dehydrogenase, cytoplasmic	yes	no	2	1.2951e-05	162.79			By MS/MS		By MS/MS
VMLGETNPADSKPGTIR	LNVVKTGRVMLGETNP	DSKPGTIRGDFCIQVG	R	V	M	I	R	G	1	1	1	1	0	0	1	2	0	1	1	1	1	0	2	1	2	0	0	1	0	0	17	1	1784.91	Q5NC82;E9PZF0;Q01768;B0LAA8;Q8R4B4;Q5NC80	Q5NC82	89	105	Nme2;Gm20390;Nme1	Nucleoside diphosphate kinase;Nucleoside diphosphate kinase B	no	no	2;3	9.5033e-06	140.22		By matching	By MS/MS	By matching	By MS/MS
VTHAVVTVPAYFNDAQR	AEAYLGKKVTHAVVTV	AYFNDAQRQATKDAGT	K	V	T	Q	R	Q	3	1	1	1	0	1	0	0	1	0	0	0	0	1	1	0	2	0	1	4	0	0	17	0	1886.96	Q3U9G2;Q3TWF2;P20029;Q9DC41;Q3TKF8;Q3TI47;Q3U7T8;Q3U6V3;Q3UEM8	Q3U9G2	166	182	Hspa5	78 kDa glucose-regulated protein	yes	no	3	1.4085e-05	136.57					By MS/MS
VVIACEGDPEVPVHFDR	RARTSTRRVVIACEGD	EVPVHFDR________	R	V	V	D	R	-	1	1	0	2	1	0	2	1	1	1	0	0	0	1	2	0	0	0	0	4	0	0	17	0	1937.93	Q5UCA9;Q8C7E4;Q8C663;Q6NXX2;Q9JJH1	Q5UCA9	131	147	Rnase4	Ribonuclease 4	yes	no	3	0.018392	51.76					By MS/MS
VYACEVTHQGLSSPVTK	KADYEKHKVYACEVTH	GLSSPVTKSFNRGEC_	K	V	Y	T	K	S	1	0	0	0	1	1	1	1	1	0	1	1	0	0	1	2	2	0	1	3	0	0	17	0	1874.92	A0A097PUD0;A0A097PUG4	A0A097PUD0	212	228			yes	no	2;3	3.1512e-21	223.06			By matching
WQERVSNMSVELLTKGK	NLVIQLKKWQERVSNM	VELLTKGKLLFLSGHD	K	W	Q	G	K	L	0	1	1	0	0	1	2	1	0	0	2	2	1	0	0	2	1	1	0	2	0	0	17	2	2004.05	Q9CX41;Q6KAN9;D3Z2X2	Q9CX41	51	67	Dnhd1;mFLJ00251		yes	no	3	0.0055611	61.757	By MS/MS	By MS/MS		By MS/MS	By MS/MS
YEDICPSTHNMDVPNIK	IDIFTGKKYEDICPST	NMDVPNIKRNDFQLIG	K	Y	E	I	K	R	0	0	2	2	1	0	1	0	1	2	0	1	1	0	2	1	1	0	1	1	0	0	17	0	2031.9	A0A0A0MQM0;P63242;Q8BGY2	A0A0A0MQM0	69	85	Eif5a;Eif5a2	Eukaryotic translation initiation factor 5A;Eukaryotic translation initiation factor 5A-1;Eukaryotic translation initiation factor 5A-2	yes	no	3	0.0017543	68.861			By matching
YFAGTMAEETAPAVLER	GKVDPAGRYFAGTMAE	TAPAVLERHQGSLYSL	R	Y	F	E	R	H	4	1	0	0	0	0	3	1	0	0	1	0	1	1	1	0	2	0	1	1	0	0	17	0	1854.88	Q64374	Q64374	113	129	Rgn	Regucalcin	yes	yes	2;3	2.6372e-14	200.77	By MS/MS	By MS/MS		By MS/MS	By MS/MS
AAVASLLQSVQVPEFTPK	GLTGSQDRAAVASLLQ	QVPEFTPKSGVKIHVS	R	A	A	P	K	S	3	0	0	0	0	2	1	0	0	0	2	1	0	1	2	2	1	0	0	3	0	0	18	0	1884.04	B9EHN0;Q02053	B9EHN0	785	802	Uba1	Ubiquitin-like modifier-activating enzyme 1	yes	no	2;3	0.0001334	97.095
AAVPSGASTGIYEALELR	YTAKGLFRAAVPSGAS	IYEALELRDNDKTRFM	R	A	A	L	R	D	4	1	0	0	0	0	2	2	0	1	2	0	0	0	1	2	1	0	1	1	0	0	18	0	1803.94	D3Z6E4;Q922A0;Q545V3;Q3UJ20;P17183;D3YVD3;D3Z2S4;A0A0N4SUX5;A0A0N4SUI6;B1ARR6;Q5SX61;Q5SX60;Q5SX59;Q4FK59;P21550;Q5FW97;P17182;Q8CF78;B0QZL1;B1ARR7	Q5FW97	33	50	Eno2;Eno1;Eno3;EG433182	Enolase;Gamma-enolase;Beta-enolase;Alpha-enolase	no	no	2;3	1.3044e-05	105.9	By MS/MS	By matching	By MS/MS	By MS/MS	By MS/MS
AEDQELESLSAIEAELEK	EEGSANRRAEDQELES	AIEAELEKVAHQLQAL	R	A	E	E	K	V	3	0	0	1	0	1	6	0	0	1	3	1	0	0	0	2	0	0	0	0	0	0	18	0	2002.96	P26339;Q3UN28	P26339	435	452	Chga	Chromogranin-A;Pancreastatin;Beta-granin;WE-14;Catestatin;GE-25;Serpinin-RRG;Serpinin;p-Glu serpinin precursor	yes	no	2;3	2.7518e-05	139.46	By MS/MS		By MS/MS		By MS/MS
AIGAVPLIQGEYMIPCEK	EEVKELQKAIGAVPLI	EYMIPCEKVSSLPTVY	K	A	I	E	K	V	2	0	0	0	1	1	2	2	0	3	1	1	1	0	2	0	0	0	1	1	0	0	18	0	1988.01	Q8VCK2;F6Y6L6;Q3U7I9;Q3UCW4;Q3UCD9;Q3UAQ1;Q3U8W5;Q3U7P0;Q3U651;Q3TXL5;Q3TWR6;Q3TWD0;Q3TIR0;Q8C243;P18242;Q3UC89	Q8VCK2	119	136	Ctsd	Cathepsin D	yes	no	2	0.0021794	70.783
AYSSFNPVMSDPNRPPCR	AIFQSLARAYSSFNPV	DPNRPPCRKNDDDSSF	R	A	Y	C	R	K	1	2	2	1	1	0	0	0	0	0	0	0	1	1	4	3	0	0	1	1	0	0	18	1	2093.94	Q543R4;Q00493	Q543R4	284	301	Cpe	Carboxypeptidase E	yes	no	2;3	2.2441e-08	171.46	By MS/MS		By MS/MS		By MS/MS
CELLYEGPPDDEAAMGIK	PVTAQKYRCELLYEGP	DEAAMGIKSCDPKGPL	R	C	E	I	K	S	2	0	0	2	1	0	3	2	0	1	2	1	1	0	2	0	0	0	1	0	0	0	18	0	2006.9	Q8C153;Q3UZ14;Q3UMI7;Q3UDC8;Q3TX47;Q3TWX1;Q3TLB1;Q3TJZ1;P58252;Q6P9L9;Q8BMA8;Q3UBL9;Q3TK17	Q8C153	369	386	Eef2	Elongation factor 2	yes	no	2	5.8542e-05	113.88					By matching
DNHLLGTFDLTGIPPAPR	EGERPLTKDNHLLGTF	TGIPPAPRGVPQIEVT	K	D	N	P	R	G	1	1	1	2	0	0	0	2	1	1	3	0	0	1	3	0	2	0	0	0	0	0	18	0	1933.01	Q3U9G2;Q3TWF2;P20029;Q9DC41;Q3TKF8;Q3TI47;Q3U7T8;Q3U6V3;Q3UEM8;Q3TUS2	Q3U9G2	476	493	Hspa5	78 kDa glucose-regulated protein	yes	no	3	7.2909e-12	124.68	By matching		By MS/MS		By MS/MS
DPEGQPGGELMLGGTDSK	IFSFYLNRDPEGQPGG	MLGGTDSKYYHGELSY	R	D	P	S	K	Y	0	0	0	2	0	1	2	5	0	0	2	1	1	0	2	1	1	0	0	0	0	0	18	0	1786.8	Q8VCK2;F6Y6L6;Q3U7I9;Q3UCW4;Q3UCD9;Q3UAQ1;Q3U8W5;Q3U7P0;Q3U651;Q3TXL5;Q3TWR6;Q3TWD0;Q3TIR0;Q8C243;P18242;F8WIR1;Q3TWL1;Q3TJN3	Q8VCK2	41	58	Ctsd	Cathepsin D	yes	no	2	0.00027191	96.447			By MS/MS
EGNDLYHEMIESGVINLK	AGVGERTREGNDLYHE	ESGVINLKDATSKVAL	R	E	G	L	K	D	0	0	2	1	0	0	3	2	1	2	2	1	1	0	0	1	0	0	1	1	0	0	18	0	2059.99	P56480	P56480	242	259	Atp5b	ATP synthase subunit beta, mitochondrial	yes	yes	3	0.00017331	88.19			By matching
EGTILANNSPCYITGWGR	VQLGVLPREGTILANN	CYITGWGRTRTNGELA	R	E	G	G	R	T	1	1	2	0	1	0	1	3	0	2	1	0	0	0	1	1	2	1	1	0	0	0	18	0	2007.95	Q91X79	Q91X79	143	160	Cela1	Chymotrypsin-like elastase family member 1	yes	yes	2;3	2.541e-29	235.4	By MS/MS	By MS/MS	By MS/MS
EGVDDQESLRPSNQQASK	TEGGGHSREGVDDQES	PSNQQASKEAKIYHSE	R	E	G	S	K	E	1	1	1	2	0	3	2	1	0	0	1	1	0	0	1	3	0	0	0	1	0	0	18	1	1986.92	Q3UZU8;Q3TY66;P16014;Q3UZP2;Q9CTW1	Q3UZU8	131	148	Chgb	Secretogranin-1;CCB peptide;PE-11	yes	no	2;3	5.0127e-20	214.24			By MS/MS		By matching
EILQEEEDLAEIVQLVGK	VPLRTKAKEILQEEED	EIVQLVGKVRGGCTGC	K	E	I	G	K	V	1	0	0	1	0	2	5	1	0	2	3	1	0	0	0	0	0	0	0	2	0	0	18	0	2054.08	P50516-2;P50516	P50516-2	481	498	Atp6v1a	V-type proton ATPase catalytic subunit A	yes	no	3	0.00017045	88.565
ENDETVSNTLTLSNGLER	VQDGFTNRENDETVSN	TLSNGLERRTNPHRED	R	E	N	E	R	R	0	1	3	1	0	0	3	1	0	0	3	0	0	0	0	2	3	0	0	1	0	0	18	0	1990.94	P47867;P47867-2	P47867	247	264	Scg3	Secretogranin-3	yes	no	2	0.01265	60.062			By MS/MS
FLSQPFQVAEVFTGHMGK	SRARKIQRFLSQPFQV	VFTGHMGKLVPLKETI	R	F	L	G	K	L	1	0	0	0	0	2	1	2	1	0	1	1	1	3	1	1	1	0	0	2	0	0	18	0	2022	P56480	P56480	463	480	Atp5b	ATP synthase subunit beta, mitochondrial	yes	yes	3	9.7833e-06	118.48		By matching			By MS/MS
FSGWYDADLSPAGHEEAK	SAWNLENRFSGWYDAD	PAGHEEAKRGGQALRD	R	F	S	A	K	R	3	0	0	2	0	0	2	2	1	0	1	1	0	1	1	2	0	1	1	0	0	0	18	0	1978.87	Q3U7Z6;Q9DBJ1	Q3U7Z6	22	39	Pgam1	Phosphoglycerate mutase 1	yes	no	3	0.041792	36.127			By MS/MS
GADFLVTEVENGGSLGSK	ISLQVKEKGADFLVTE	NGGSLGSKKGVNLPGA	K	G	A	S	K	K	1	0	1	1	0	0	2	4	0	0	2	1	0	1	0	2	1	0	0	2	0	0	18	0	1778.87	P52480;P52480-2	P52480	189	206	Pkm	Pyruvate kinase PKM	no	no	2	8.4031e-05	138.66			By matching		By MS/MS
GHVFEESQVAGTPMFVVK	YGVLNRKRGHVFEESQ	GTPMFVVKAYLPVNES	R	G	H	V	K	A	1	0	0	0	0	1	2	2	1	0	0	1	1	2	1	1	1	0	0	4	0	0	18	0	1960.97	Q8C153;Q3UZ14;Q3UMI7;Q3UDC8;Q3TX47;Q3TWX1;Q3TLB1;Q3TJZ1;P58252;Q6P9L9;Q8BMA8;Q3TW58;Q3TK17;Q3TSK4;Q3TPG2;Q99LT6;Q61509	Q8C153	768	785	Eef2	Elongation factor 2	yes	no	2	0.00078917	78.917
GHYTEGAELVDSVLDVVR	GAGNNWAKGHYTEGAE	DSVLDVVRKEAESCDC	K	G	H	V	R	K	1	1	0	2	0	0	2	2	1	0	2	0	0	0	0	1	1	0	1	4	0	0	18	0	1957.97	B2RSN3;Q9CWF2;Q7TMM9;G3UZR1;P68372;Q9CVR0;Q3U9U3;Q3UMM1;Q922F4;P99024	P68372	104	121	Tubb2b;Tubb2a;Tubb5;Tubb4b;Tubb6	Tubulin beta-2B chain;Tubulin beta-2A chain;Tubulin beta-4B chain;Tubulin beta-6 chain;Tubulin beta-5 chain	no	no	2;3	1.9044e-39	250.41	By MS/MS	By matching	By MS/MS	By matching	By MS/MS
GIVDQSQQAYQEAFEISK	VAAGDDKKGIVDQSQQ	QEAFEISKKEMQPTHP	K	G	I	S	K	K	2	0	0	1	0	4	2	1	0	2	0	1	0	1	0	2	0	0	1	1	0	0	18	0	2039.98	P63101;Q3UA58	P63101	140	157	Ywhaz	14-3-3 protein zeta/delta	yes	no	2;3	6.2715e-21	219.23	By MS/MS		By MS/MS		By MS/MS
ISSVQSIVPALEIANAHR	YVLLSEKKISSVQSIV	LEIANAHRKPLVIIAE	K	I	S	H	R	K	3	1	1	0	0	1	1	0	1	3	1	0	0	0	1	3	0	0	0	2	0	0	18	0	1904.05	P63038	P63038	251	268	Hspd1	60 kDa heat shock protein, mitochondrial	yes	yes	3	0.029365	43.208			By matching
ITLPVDFVTADKFDENAK	KAEKNGVKITLPVDFV	DKFDENAKTGQATVAS	K	I	T	A	K	T	2	0	1	3	0	0	1	0	0	1	1	2	0	2	1	0	2	0	0	2	0	0	18	1	2022.03	P09411	P09411	280	297	Pgk1	Phosphoglycerate kinase 1	yes	yes	3	2.4012e-05	155.63		By matching		By matching	By MS/MS
KEGGLGPLNIPLLADVTK	LAWINTPRKEGGLGPL	PLLADVTKSLSQNYGV	R	K	E	T	K	S	1	0	1	1	0	0	1	3	0	1	4	2	0	0	2	0	1	0	0	1	0	0	18	1	1834.06	Q61171;D3Z4A4	Q61171	92	109	Prdx2	Peroxiredoxin-2	yes	no	3	0.005767	58.848					By MS/MS
LGNTISSLFGGGTSSDAK	EEESTLTKLGNTISSL	GGTSSDAKENGTDAVQ	K	L	G	A	K	E	1	0	1	1	0	0	0	4	0	1	2	1	0	1	0	4	2	0	0	0	0	0	18	0	1710.84	Q9JKR6	Q9JKR6	577	594	Hyou1	Hypoxia up-regulated protein 1	yes	yes	2	0.0047372	67.645
LHIIEVGTPPTGNQPFPK	VRGQAGGKLHIIEVGT	TGNQPFPKKAVDVFFP	K	L	H	P	K	K	0	0	1	0	0	1	1	2	1	2	1	1	0	1	4	0	2	0	0	1	0	0	18	0	1944.05	Q5SXR6;Q68FD5;Q80U89;Q3TAN1;Q3TYQ2;Q3U0H2	Q5SXR6	232	249	Cltc;mKIAA0034	Clathrin heavy chain;Clathrin heavy chain 1	yes	no	3	0.020346	52.862
LTFPLDYHLNQPFLFVLR	SPGLQPVRLTFPLDYH	QPFLFVLRDTDTGALL	R	L	T	L	R	D	0	1	1	1	0	1	0	0	1	0	5	0	0	3	2	0	1	0	1	1	0	0	18	0	2232.21	P97298	P97298	381	398	Serpinf1	Pigment epithelium-derived factor	yes	yes	3	3.0264e-10	193.47		By MS/MS		By MS/MS	By matching
PNQISLINMDLPMVSGDR	SEPLRIAKPNQISLIN	LPMVSGDRIHCMDILF	K	P	N	D	R	I	0	1	2	2	0	1	0	1	0	2	2	0	2	0	2	2	0	0	0	1	0	0	18	0	1998.99	K3W4N7;A0A0R4J1M7;Q9JJV9-2;Q9JJV9	K3W4N7	1833	1850	Scn5a	Sodium channel protein;Sodium channel protein type 5 subunit alpha	yes	no	2	0.022868	50.178			By matching
QAPYENLNDQELGEYLAR	WIPDVESRQAPYENLN	ELGEYLARMLVKYPEL	R	Q	A	A	R	M	2	1	2	1	0	2	3	1	0	0	3	0	0	0	1	0	0	0	2	0	0	0	18	0	2122	Q03517;Q4W8U9	Q03517	493	510	Scg2	Secretogranin-2;Secretoneurin;Manserin	yes	no	2	7.3458e-06	99.813
QTIENSQGAYQEAFDISK	VACGDDRKQTIENSQG	QEAFDISKKEMQPTHP	K	Q	T	S	K	K	2	0	1	1	0	3	2	1	0	2	0	1	0	1	0	2	1	0	1	0	0	0	18	0	2027.94	A3KML3;F6YY69;F6VW30;P68254-2;P68254	A3KML3	140	157	Ywhaq	14-3-3 protein theta	yes	no	2	1.3781e-14	160.55
SAIVHLINYQDDAELATR	AEPSQLLKSAIVHLIN	DDAELATRALPELTKL	K	S	A	T	R	A	3	1	1	2	0	1	1	0	1	2	2	0	0	0	0	1	1	0	1	1	0	0	18	0	2028.03	Q02257	Q02257	125	142	Jup	Junction plakoglobin	yes	yes	3	1.7313e-05	133.93	By MS/MS		By MS/MS
SGDYWIDPNQGCTLDAMK	KLCHPEWKSGDYWIDP	GCTLDAMKVFCNMETG	K	S	G	M	K	V	1	0	1	3	1	1	0	2	0	1	1	1	1	0	1	1	1	1	1	0	0	0	18	0	2069.88	P28481-2;P28481-7;P28481-6;P28481-5;P28481-4;P28481-1;P28481	P28481-2	1198	1215	Col2a1	Collagen alpha-1(II) chain;Collagen alpha-1(II) chain;Chondrocalcin	yes	no	2	5.6136e-05	136.36
SGEYWIDPNQGCNLDAIK	KMCHSDWKSGEYWIDP	GCNLDAIKVYCNMETG	K	S	G	I	K	V	1	0	2	2	1	1	1	2	0	2	1	1	0	0	1	1	0	1	1	0	0	0	18	0	2078.94	Q99LL6;P11087-2;P11087;Q60785	Q99LL6	396	413	Col1a1	Collagen alpha-1(I) chain	yes	no	2	6.3057e-20	181.81	By MS/MS	By MS/MS		By MS/MS	By MS/MS
SLPSVETLGCTSVICSDK	AKKNAIVRSLPSVETL	TSVICSDKTGTLTTNQ	R	S	L	D	K	T	0	0	0	1	2	0	1	1	0	1	2	1	0	0	1	4	2	0	0	2	0	0	18	0	1951.92	O54994;J3KMM5;Q5DTI2;O55143-2;O55143;Q8R429	O54994	230	247	Atp2a2;Atp2a1	Calcium-transporting ATPase;Sarcoplasmic/endoplasmic reticulum calcium ATPase 2;Sarcoplasmic/endoplasmic reticulum calcium ATPase 1	no	no	2	0.0020012	72.359			By matching
SQTNLTDCPFHDQPHLMR	MGRTTCTKSQTNLTDC	HDQPHLMRKALCSFQI	K	S	Q	M	R	K	0	1	1	2	1	2	0	0	2	0	2	0	1	1	2	1	2	0	0	0	0	0	18	0	2195.98	Q3U5K7;Q9EPX9;P21460	Q3U5K7	96	113	Cst3	Cystatin-C	yes	no	4	0.00030227	83.404			By MS/MS		By MS/MS
SSILLDVKPWDDETDMTK	KKPAVVAKSSILLDVK	DDETDMTKLEECVRSI	K	S	S	T	K	L	0	0	0	4	0	0	1	0	0	1	2	2	1	0	1	2	2	1	0	1	0	0	18	1	2092	A0A087WS46;O70251	A0A087WS46	99	116	Eef1b2;Eef1b	Elongation factor 1-beta	yes	no	3	0.00012675	96.143			By matching
TADDGCLENAPDTAEFSR	PNPCPLGKTADDGCLE	PDTAEFSREFQLDQHL	K	T	A	S	R	E	3	1	1	3	1	0	2	1	0	0	1	0	0	1	1	1	2	0	0	0	0	0	18	0	1967.82	Q3TT51;P12961	Q3TT51	125	142	Scg5	Neuroendocrine protein 7B2;N-terminal peptide;C-terminal peptide	yes	no	2;3	2.7605e-40	259.22	By MS/MS		By MS/MS		By MS/MS
TLSLKLNDLSTCNDLIAK	SELHHTLKTLSLKLND	TCNDLIAKHGAALQRS	K	T	L	A	K	H	1	0	2	2	1	0	0	0	0	1	5	2	0	0	0	2	2	0	0	0	0	0	18	1	2018.07	Q5F209;Q5QNQ6	Q5F209	49	66	Osbp2	Oxysterol-binding protein 2	yes	no	3	0.00074926	73.279		By MS/MS		By MS/MS	By MS/MS
TVAAPSVFIFPPSDEQLK	GTKLEIKRTVAAPSVF	PPSDEQLKSGTASVVC	R	T	V	L	K	S	2	0	0	1	0	1	1	0	0	1	1	1	0	2	3	2	1	0	0	2	0	0	18	0	1945.02	A0A097PUD0;A0A097PUG4	A0A097PUD0	130	147			yes	no	2	0.018179	54.764	By matching		By matching
TVTNAVVTVPAYFNDSQR	IAEAYLGKTVTNAVVT	AYFNDSQRQATKDAGT	K	T	V	Q	R	Q	2	1	2	1	0	1	0	0	0	0	0	0	0	1	1	1	3	0	1	4	0	0	18	0	1980.99	Q3UBA6;Q3TZJ3;Q3TH56;Q3TEK2;P63017;Q3U9L2;Q3TF16;Q3TQ13;Q3UDS0;Q3ULM1;Q3TRH3;Q3TB63;Q3KQJ4;Q3TH04	Q3UBA6	138	155	Hspa8	Heat shock cognate 71 kDa protein	yes	no	2;3	1.1449e-06	176.94					By MS/MS
VAPEEHPVLLTEAPLNPK	HTFYNELRVAPEEHPV	TEAPLNPKANREKMTQ	R	V	A	P	K	A	2	0	1	0	0	0	3	0	1	0	3	1	0	0	4	0	1	0	0	2	0	0	18	0	1953.06	Q3UAF7;Q3UAF6;Q3U5R4;B2RRX1;P60710;Q3UAA9;Q3UA89;Q3U939;Q3U804;Q3UGS0;Q61276;Q3TIJ9;Q3UCF8;E9Q5F4;G3UZ07;A1E281;E9Q606;Q4KL81;P63260;Q3TSB7;Q3UD81;G3UYG0;Q9QZ83	Q3UAF7	96	113	Actb;Actg1	Actin, cytoplasmic 1;Actin, cytoplasmic 1, N-terminally processed;Actin, cytoplasmic 2;Actin, cytoplasmic 2, N-terminally processed	no	no	2;3	1.8692e-29	237.89	By MS/MS	By MS/MS	By MS/MS	By MS/MS	By MS/MS
VGINYQPPTVVPGGDLAK	DWCPTGFKVGINYQPP	VPGGDLAKVQRAVCML	K	V	G	A	K	V	1	0	1	1	0	1	0	3	0	1	1	1	0	0	3	0	1	0	1	3	0	0	18	0	1823.98	P05213;Q99KA2;P68369;Q52L87;Q3TIZ0;P68373;Q5FW91;P05214;Q9D9Y2;Q9JJZ2;A0A0A0MQA5;P68368	P05213	353	370	Tuba1b;Tuba1a;Tuba1c;Tuba3a;Tuba8;Tuba4a	Tubulin alpha-1B chain;Tubulin alpha-1A chain;Tubulin alpha-1C chain;Tubulin alpha-3 chain;Tubulin alpha-8 chain;Tubulin alpha-4A chain	no	no	2;3	0.00028777	95.602	By matching	By matching	By matching	By MS/MS	By MS/MS
VLNNMEIGTSLYDEEGAK	GMAFTFLKVLNNMEIG	LYDEEGAKIVKDLMSK	K	V	L	A	K	I	1	0	2	1	0	0	3	2	0	1	2	1	1	0	0	1	1	0	1	1	0	0	18	0	1981.93	P09411	P09411	247	264	Pgk1	Phosphoglycerate kinase 1	yes	yes	2	2.7554e-05	120.9			By matching		By MS/MS
VNPTVFFDITADDEPLGR	________________	ADDEPLGRVSFELFAD	M	V	N	G	R	V	1	1	1	3	0	0	1	1	0	1	1	0	0	2	2	0	2	0	0	2	0	0	18	0	2004.98	Q5SVY2;Q3UAJ1;Q3TE63;P17742;Q9CZK9	Q5SVY2	2	19	Ppia	Peptidyl-prolyl cis-trans isomerase;Peptidyl-prolyl cis-trans isomerase A;Peptidyl-prolyl cis-trans isomerase A, N-terminally processed	yes	no	2	3.1406e-05	145.43	By MS/MS		By MS/MS		By MS/MS
VSHVSTGGGASLELLEGK	AKWNTEDKVSHVSTGG	SLELLEGKVLPGVDAL	K	V	S	G	K	V	1	0	0	0	0	0	2	4	1	0	3	1	0	0	0	3	1	0	0	2	0	0	18	0	1739.91	P09411;P09041	P09411	389	406	Pgk1;Pgk2	Phosphoglycerate kinase 1;Phosphoglycerate kinase 2	yes	no	3	1.0111e-05	119.96			By matching
AAESLADPTEYENLFPGLK	NLSKVNQKAAESLADP	ENLFPGLKEAFVVEEW	K	A	A	L	K	E	3	0	1	1	0	0	3	1	0	0	3	1	0	1	2	1	1	0	1	0	0	0	19	0	2064.01	O55029	O55029	784	802	Copb2	Coatomer subunit beta	yes	yes	2	0.0001538	98.062
AAFDDAIAELDTLSEESYK	DRACRLAKAAFDDAIA	TLSEESYKDSTLIMQL	K	A	A	Y	K	D	4	0	0	3	0	0	3	0	0	1	2	1	0	1	0	2	1	0	1	0	0	0	19	0	2086.96	Q5SS40;P62259;Q8BPH1;Q3V453	Q5SS40	197	215	Ywhae	14-3-3 protein epsilon	yes	no	3	4.8552e-10	186.94	By MS/MS	By MS/MS			By MS/MS
AIAELGIYPAVDPLDSTSR	DATTVLSRAIAELGIY	DPLDSTSRIMDPNIVG	R	A	I	S	R	I	3	1	0	2	0	0	1	1	0	2	2	0	0	0	2	2	1	0	1	1	0	0	19	0	1987.03	P56480	P56480	388	406	Atp5b	ATP synthase subunit beta, mitochondrial	yes	yes	2	2.4743e-05	129.11	By matching		By matching		By MS/MS
AIGSASEGAQSSLQEVYHK	TFVQCDARAIGSASEG	SLQEVYHKSMTLKEAI	R	A	I	H	K	S	3	0	0	0	0	2	2	2	1	1	1	1	0	0	0	4	0	0	1	1	0	0	19	0	1960.95	Q3UPK6;Q3TUX3;Q3TUI9;D3YX79;Q9Z2U1	Q3UPK6	169	187	Psma5;Gm8394	Proteasome subunit alpha type;Proteasome subunit alpha type-5	yes	no	3	0.00047127	76.378			By MS/MS
AVLLQGSNDVELVAEGNSR	EETGSLNKAVLLQGSN	LVAEGNSRFTYSVLVD	K	A	V	S	R	F	2	1	2	1	0	1	2	2	0	0	3	0	0	0	0	2	0	0	0	3	0	0	19	0	1970.01	Q91VL4;Q3TP88;Q3TUE2;Q3TX57;Q3TU64;Q01149	Q91VL4	489	507	Col1a2	Collagen alpha-2(I) chain	yes	no	2	0.00012745	100.02
DATNVGDEGGFAPNILENK	VIKEKYGKDATNVGDE	APNILENKEALELLKT	K	D	A	N	K	E	2	0	3	2	0	0	2	3	0	1	1	1	0	1	1	0	1	0	0	1	0	0	19	0	1959.92	Q5FW97;P17182;Q6PHC1;B0QZL1	Q5FW97	203	221	EG433182;Eno1	Alpha-enolase;Enolase	yes	no	2	1.5676e-05	159.95					By MS/MS
DELHIVEAEAMNYEGSPIK	VSLGAGAKDELHIVEA	NYEGSPIKVTLATLKM	K	D	E	I	K	V	2	0	1	1	0	0	4	1	1	2	1	1	1	0	1	1	0	0	1	1	0	0	19	0	2144.01	Q3UDA7;Q8BSZ3;Q9DAY9;Q5BL09;Q5SQB0;E9Q5T3;Q5SQB5;Q5U438;Q5SQB7;Q3U536;Q61937	Q3UDA7	55	73	Npm1;Gm5611	Nucleophosmin	yes	no	3	0.00023805	82.865			By matching		By matching
DFSEDQGYPDPPNPCPLGK	LTGDNIPKDFSEDQGY	PNPCPLGKTADDGCLE	K	D	F	G	K	T	0	0	1	3	1	1	1	2	0	0	1	1	0	1	5	1	0	0	1	0	0	0	19	0	2131.92	Q3TT51;P12961	Q3TT51	106	124	Scg5	Neuroendocrine protein 7B2;N-terminal peptide;C-terminal peptide	yes	no	2;3	2.9855e-05	133.86			By MS/MS		By MS/MS
DNLTLWTSDMQGDGEEQNK	TLIMQLLRDNLTLWTS	GDGEEQNKEALQDVED	R	D	N	N	K	E	0	0	2	3	0	2	2	2	0	0	2	1	1	0	0	1	2	1	0	0	0	0	19	0	2179.93	Q5SS40;P62259;Q8BPH1;Q3V453	Q5SS40	226	244	Ywhae	14-3-3 protein epsilon	yes	no	2	9.1244e-15	207.56			By matching
ELFSPLHALNFGIGGDTTR	MQQYEIWRELFSPLHA	GIGGDTTRHVLWRLKN	R	E	L	T	R	H	1	1	1	1	0	0	1	3	1	1	3	0	0	2	1	1	2	0	0	0	0	0	19	0	2044.04	Q8BTA2;Q61206	Q8BTA2	61	79	Pafah1b2	Platelet-activating factor acetylhydrolase IB subunit beta	yes	no	3	9.8861e-06	128.72					By MS/MS
EVSQPDWTPPPEVTLSLTK	EEIVAKVREVSQPDWT	EVTLSLTKDNFDDVVN	R	E	V	T	K	D	0	0	0	1	0	1	2	0	0	0	2	1	0	0	4	2	3	1	0	2	0	0	19	0	2123.08	A0A0R4J0Z1;P08003	A0A0R4J0Z1	162	180	Pdia4	Protein disulfide-isomerase A4	yes	no	2	0.0074364	63.639					By MS/MS
EVTINADTTCGNDWVCEHR	PNNNGVTKEVTINADT	NDWVCEHRWRQIRNMV	K	E	V	H	R	W	1	1	2	2	2	0	2	1	1	1	0	0	0	0	0	0	3	1	0	2	0	0	19	0	2275.96	Q8C5B4;Q61298;P00688;Q61299	P00688	381	399	Amy2	Alpha-amylase;Pancreatic alpha-amylase	no	no	2;3	8.1223e-111	329.08	By MS/MS	By MS/MS	By MS/MS	By MS/MS
FDLGQDVIDFTGHALALYR	SMRDVYRKFDLGQDVI	GHALALYRTDDYLDQP	K	F	D	Y	R	T	2	1	0	3	0	1	0	2	1	1	3	0	0	2	0	0	1	0	1	1	0	0	19	0	2150.08	P50396	P50396	175	193	Gdi1	Rab GDP dissociation inhibitor alpha	yes	yes	3	1.3407e-05	135.29		By matching		By MS/MS	By MS/MS
GPLLVQDVVFTDEMAHFDR	NIMTAGSRGPLLVQDV	DEMAHFDRERIPERVV	R	G	P	D	R	E	1	1	0	3	0	1	1	1	1	0	2	0	1	2	1	0	1	0	0	3	0	0	19	0	2188.06	Q91XI2;Q542K4;Q3TVZ1;A2AL20;Q8C6E3;Q3UZE7;P24270	Q91XI2	48	66	Cat	Catalase	yes	no	3	0.00010252	90.718	By MS/MS		By MS/MS		By matching
GSYGDLGGPIITTQVTIPK	DYSYAGGRGSYGDLGG	TTQVTIPKDLAGSIIG	R	G	S	P	K	D	0	0	0	1	0	1	0	4	0	3	1	1	0	0	2	1	3	0	1	1	0	0	19	0	1916.03	Q3TG17;H3BLL4;B2M1R6;Q3U9Q3;Q3U6X2;Q3TUA1;Q3TJ38;Q5FWJ5;Q3TL71;P61979-3;P61979;P61979-2;H3BLP7;D3Z5X4;D3YWG1	Q3TG17	309	327	Hnrnpk;Gm7964	Heterogeneous nuclear ribonucleoprotein K	yes	no	2	0.0013926	73.76					By matching
GVTIIGPATVGGIKPGCFK	LIKKADQKGVTIIGPA	GIKPGCFKIGNTGGML	K	G	V	F	K	I	1	0	0	0	1	0	0	5	0	3	0	2	0	1	2	0	2	0	0	2	0	0	19	1	1871.03	Q3TED3;Q3V117;Q91V92;Q3UEA1;Q8VDM8	Q3TED3	607	625	Acly	ATP-citrate synthase	yes	no	2;3	5.8073e-05	123.14					By MS/MS
GYFNEELSEILSDPSDDTK	PVDMAYKRGYFNEELS	SDPSDDTKGFFDPNTE	R	G	Y	T	K	G	0	0	1	3	0	0	3	1	0	1	2	1	0	1	1	3	1	0	1	0	0	0	19	0	2157.96	E9Q557;E9PZW0;Q8BP77	E9Q557	2407	2425	Dsp	Desmoplakin	yes	no	2	7.5446e-05	106.75	By MS/MS
IADPDAVKPDDWDEDAPSK	EDWDERPKIADPDAVK	WDEDAPSKIPDEEATK	K	I	A	S	K	I	3	0	0	6	0	0	1	0	0	1	0	2	0	0	3	1	0	1	0	1	0	0	19	1	2082.94	Q5SUC3;Q3TXE5;P35564	Q5SUC3	294	312	Canx	Calnexin	yes	no	3	0.0077815	56.719			By matching
ITGLDPAEPYFQGTPEEVR	RTFGAIGRITGLDPAE	QGTPEEVRLDPTDAQF	R	I	T	V	R	L	1	1	0	1	0	1	3	2	0	1	1	0	0	1	3	0	2	0	1	1	0	0	19	0	2118.03	Q6P8U6	Q6P8U6	189	207	Pnlip	Pancreatic triacylglycerol lipase	yes	yes	2	2.6896e-05	131.25	By MS/MS		By MS/MS
ITGLDPVEANFEGTPEEVR	SRTPGLGRITGLDPVE	EGTPEEVRLDPSDADF	R	I	T	V	R	L	1	1	1	1	0	0	4	2	0	1	1	0	0	1	2	0	2	0	0	2	0	0	19	0	2072.01	Q5BKQ4	Q5BKQ4	190	208	Pnliprp1	Inactive pancreatic lipase-related protein 1	yes	yes	2;3	4.0762e-10	190.55	By MS/MS		By MS/MS
LASTLVHLGEYQAAVDGAR	NNVSNFGRLASTLVHL	QAAVDGARKANSTRTW	R	L	A	A	R	K	4	1	0	1	0	1	1	2	1	0	3	0	0	0	0	1	1	0	1	2	0	0	19	0	1970.02	Q5SXR6;Q68FD5;Q80U89;Q3UPJ3;Q8K2I5	Q5SXR6	1231	1249	Cltc;mKIAA0034	Clathrin heavy chain;Clathrin heavy chain 1	yes	no	3	3.063e-05	106.75
LDPAALAAQLVPAPAAAPR	ARALLRARLDPAALAA	PAPAAAPRPRPPVYDD	R	L	D	P	R	P	8	1	0	1	0	1	0	0	0	0	3	0	0	0	4	0	0	0	0	1	0	0	19	0	1812.03	Q9QXV0	Q9QXV0	145	163	Pcsk1n	ProSAAS;KEP;Big SAAS;Little SAAS;Big PEN-LEN;PEN;PEN-20;PEN-19;Little LEN;Big LEN	yes	yes	2;3	0.0001668	97.095	By MS/MS		By MS/MS		By MS/MS
LGCFSDDAPWSGTLDRPLK	GREVCFDKLGCFSDDA	GTLDRPLKALPWSPAQ	K	L	G	L	K	A	1	1	0	3	1	0	0	2	0	0	3	1	0	1	2	2	1	1	0	0	0	0	19	1	2134.02	Q6P8U6;Q9D950	Q6P8U6	24	42	Pnlip;mCG_10680	Pancreatic triacylglycerol lipase;Triacylglycerol lipase	yes	no	3	5.24e-05	100.97		By MS/MS			By matching
LIPEMDQVFTEVEMTTLEK	SIFLKGARLIPEMDQV	VEMTTLEKVINDTWAW	R	L	I	E	K	V	0	0	0	1	0	1	4	0	0	1	2	1	2	1	1	0	3	0	0	2	0	0	19	0	2252.1	Q9JKR6	Q9JKR6	841	859	Hyou1	Hypoxia up-regulated protein 1	yes	yes	2;3	3.104e-05	106.57	By MS/MS	By matching			By MS/MS
LISLTDENALAGNEELTVK	SDALDKIRLISLTDEN	GNEELTVKIKCDKEKN	R	L	I	V	K	I	2	0	2	1	0	0	3	1	0	1	4	1	0	0	0	1	2	0	0	1	0	0	19	0	2029.06	Q91V38;Q3UAD6;P08113;Q8C2R2	Q91V38	117	135	Hsp90b1	Endoplasmin	yes	no	2	0.00015228	98.175	By matching		By matching
LLQKPLDSQSIYQLIEISR	PNGDRAARLLQKPLDS	YQLIEISRNLQIPPED	R	L	L	S	R	N	0	1	0	1	0	3	1	0	0	3	4	1	0	0	1	3	0	0	1	0	0	0	19	1	2243.25	Q03517	Q03517	340	358	Scg2	Secretogranin-2;Secretoneurin;Manserin	yes	yes	2;3	2.6325e-13	134.04	By matching			By MS/MS	By MS/MS
MKCSLKGGNNDSWMNPLAK	________________	SWMNPLAKQFSNMGLL	-	M	K	A	K	Q	1	0	3	1	1	0	0	2	0	0	2	3	2	0	1	2	0	1	0	0	0	0	19	2	2150.01	Q3TRK2	Q3TRK2	1	19	Tnrc6b		yes	yes	3	0.019335	44.998		By matching		By MS/MS	By MS/MS
NPYYGGESSSITPLEELYK	KKVLHMDRNPYYGGES	TPLEELYKRFQILEGP	R	N	P	Y	K	R	0	0	1	0	0	0	3	2	0	1	2	1	0	0	2	3	1	0	3	0	0	0	19	0	2146.01	P50396;D6RI86	P50396	36	54	Gdi1	Rab GDP dissociation inhibitor alpha	yes	no	2	0.011069	59.585			By matching
NTNDANSCQIIIPQNQVNR	CILSHPIKNTNDANSC	IPQNQVNRKSDIYVCM	K	N	T	N	R	K	1	1	5	1	1	3	0	0	0	3	0	0	0	0	1	1	1	0	0	1	0	0	19	0	2198.05	P50396;B7FAU8;Q3UUX9;Q3TIY6;Q3UC72;Q3UPA3;Q61598-2;Q61598	P50396	310	328	Gdi1;Gdi2	Rab GDP dissociation inhibitor alpha;Rab GDP dissociation inhibitor beta	no	no	2	2.4007e-81	254.53			By matching		By MS/MS
PLIPATAPQEPETYEDIIK	DVEPGYLRPLIPATAP	ETYEDIIKDIEKIIMP	R	P	L	I	K	D	2	0	0	1	0	1	3	0	0	3	1	1	0	0	4	0	2	0	1	0	0	0	19	0	2124.1	Q5SUV8;O88533;Q5SUV9;Q3TUH2;O35958	Q5SUV8	40	58	Ddc	Aromatic-L-amino-acid decarboxylase	yes	no	2	0.01323	57.173
PSPMPVSPECLETLQGDER	VISDSLSKPSPMPVSP	ETLQGDERILSILRHQ	K	P	S	E	R	I	0	1	0	1	1	1	3	1	0	0	2	0	1	0	4	2	1	0	0	1	0	0	19	0	2140.98	P26339	P26339	47	65	Chga	Chromogranin-A;Pancreastatin;Beta-granin;WE-14;Catestatin;GE-25;Serpinin-RRG;Serpinin;p-Glu serpinin precursor	yes	yes	2	1.5972e-05	120.4					By MS/MS
QHLCGPHLVEALYLVCGER	KPTQAFVKQHLCGPHL	LYLVCGERGFFYTPKS	K	Q	H	E	R	G	1	1	0	0	2	1	2	2	2	0	4	0	0	0	1	0	0	0	1	2	0	0	19	0	2250.1	Q545I7;P01325	Q545I7	28	46	Ins1	Insulin-1;Insulin-1 B chain;Insulin-1 A chain	yes	no	3;4	2.8892e-10	191.07				By MS/MS	By MS/MS
QHLCGSHLVEALYLVCGER	HPTQAFVKQHLCGSHL	LYLVCGERGFFYTPMS	K	Q	H	E	R	G	1	1	0	0	2	1	2	2	2	0	4	0	0	0	0	1	0	0	1	2	0	0	19	0	2240.08	Q5EEX1;P01326;D0EY27;E0CXX7;D3YWU5;D3Z596;D3Z595	Q5EEX1	28	46	Ins2	Insulin-2;Insulin-2 B chain;Insulin-2 A chain	yes	no	2;3;4	4.8436e-140	359	By MS/MS	By MS/MS		By MS/MS	By MS/MS
RAEDQELESLSAIEAELEK	EEEGSANRRAEDQELE	AIEAELEKVAHQLQAL	R	R	A	E	K	V	3	1	0	1	0	1	6	0	0	1	3	1	0	0	0	2	0	0	0	0	0	0	19	1	2159.06	P26339;Q3UN28	P26339	434	452	Chga	Chromogranin-A;Pancreastatin;Beta-granin;WE-14;Catestatin;GE-25;Serpinin-RRG;Serpinin;p-Glu serpinin precursor	yes	no	3	7.0228e-07	170.38	By MS/MS		By MS/MS
SPYLYPLYGLGELPQGFAR	ESLARYGKSPYLYPLY	ELPQGFARLSAIYGGT	K	S	P	A	R	L	1	1	0	0	0	1	1	3	0	0	4	0	0	1	3	1	0	0	3	0	0	0	19	0	2140.1	P50396;Q3UUX9;Q3TIY6;Q3UC72;Q3UPA3;Q61598-2;Q61598	P50396	222	240	Gdi1;Gdi2	Rab GDP dissociation inhibitor alpha;Rab GDP dissociation inhibitor beta	no	no	3	9.314e-06	127.32					By MS/MS
SYWEDNKNSLISYLEQIHR	FPPEETLKSYWEDNKN	SYLEQIHRGVKGFVRD	K	S	Y	H	R	G	0	1	2	1	0	1	2	0	1	2	2	1	0	0	0	3	0	1	2	0	0	0	19	1	2394.16	Q543R4;Q00493	Q543R4	356	374	Cpe	Carboxypeptidase E	yes	no	3	9.6442e-14	137.99				By MS/MS
TAFDDAIAELDTLNEDSYK	EQACHLAKTAFDDAIA	TLNEDSYKDSTLIMQL	K	T	A	Y	K	D	3	0	1	4	0	0	2	0	0	1	2	1	0	1	0	1	2	0	1	0	0	0	19	0	2129.96	A8IP69;P61982	A8IP69	199	217	Ywhag	14-3-3 protein gamma;14-3-3 protein gamma, N-terminally processed	yes	no	2;3	2.1483e-05	144.3	By MS/MS
TAFDEAIAELDTLNEDSYK	ELACTLAKTAFDEAIA	TLNEDSYKDSTLIMQL	K	T	A	Y	K	D	3	0	1	3	0	0	3	0	0	1	2	1	0	1	0	1	2	0	1	0	0	0	19	0	2143.98	A3KML3;F6YY69;F6VW30;P68254-2;P68254	A3KML3	194	212	Ywhaq	14-3-3 protein theta	yes	no	2;3	4.8805e-16	212.32		By matching			By MS/MS
TAFDEAIAELDTLSEESYK	EKACSLAKTAFDEAIA	TLSEESYKDSTLIMQL	K	T	A	Y	K	D	3	0	0	2	0	0	4	0	0	1	2	1	0	1	0	2	2	0	1	0	0	0	19	0	2130.98	P63101;Q3UA58	P63101	194	212	Ywhaz	14-3-3 protein zeta/delta	yes	no	2;3	8.4161e-15	200.58	By MS/MS	By MS/MS	By MS/MS		By MS/MS
VFIMDNCEELIPEYLNFIR	NIKLYVRRVFIMDNCE	PEYLNFIRGVVDSEDL	R	V	F	I	R	G	0	1	2	1	1	0	3	0	0	3	2	0	1	2	1	0	0	0	1	1	0	0	19	0	2414.16	Q80Y52;Q3UIF3;Q3TKA2;P07901;Q3TJU7;A0PJ91;Q3TKB9;Q8C5U3;Q3TKG0	Q80Y52	369	387	Hsp90aa1	Heat shock protein HSP 90-alpha	yes	no	2;3	8.5306e-06	125.41		By MS/MS		By MS/MS	By MS/MS
VLEPMPSTAEISTSGAVLK	VPDIRWRKVLEPMPST	STSGAVLKIFNIQLED	K	V	L	L	K	I	2	0	0	0	0	0	2	1	0	1	2	1	1	0	2	3	2	0	0	2	0	0	19	0	1929.01	P12960	P12960	278	296	Cntn1	Contactin-1	yes	yes	2	5.8566e-05	109.72		By matching			By matching
VPSTETEALASNLMGMFEK	YKGGKIYKVPSTETEA	NLMGMFEKRRFRKFLV	K	V	P	E	K	R	2	0	1	0	0	0	3	1	0	0	2	1	2	1	1	2	2	0	0	1	0	0	19	0	2053.97	P50396	P50396	119	137	Gdi1	Rab GDP dissociation inhibitor alpha	yes	yes	3	1.2986e-05	134.82	By matching				By MS/MS
VSVHDEDDVSLIQELANTK	FDGNRVFRVSVHDEDD	IQELANTKQIDFWKPD	R	V	S	T	K	Q	1	0	1	3	0	1	2	0	1	1	2	1	0	0	0	2	1	0	0	3	0	0	19	0	2111.04	B2RS76	B2RS76	28	46	Cpb1		yes	yes	3	8.4421e-06	160.66	By MS/MS		By MS/MS
VTIAQGGVLPNIQAVLLPK	ELNKLLGKVTIAQGGV	IQAVLLPKKTESHHKA	K	V	T	P	K	K	2	0	1	0	0	2	0	2	0	2	3	1	0	0	2	0	1	0	0	3	0	0	19	0	1930.16	F8WIX8;A0A0N4SV66;A0AUV1;A3KPD0;Q8CGP4;Q149V4;B2RWH3;B2RVF0;A2AB79;Q8CGP6;Q8R1M2;Q64523;Q8CGP7;Q8CGP5;Q8BFU2;Q6GSS7;P22752;Q61668	F8WIX8	96	114	Hist1h2al;Hist1h2ah;Hist1h2aa;Hist2h2ac;Hist2h2aa1;Hist1h2ad;Hist3h2a;H2afj;Hist1h2ak;Hist1h2af;Hist1h2ab	Histone H2A;Histone H2A type 1-H;Histone H2A.J;Histone H2A type 2-C;Histone H2A type 1-K;Histone H2A type 1-F;Histone H2A type 3;Histone H2A type 2-A;Histone H2A type 1	yes	no	2	2.0592e-05	124.99		By matching	By matching	By MS/MS	By MS/MS
YDWLDIWDGIPHVGPLIGK	QVGEGDCKYDWLDIWD	HVGPLIGKYCGTKTPS	K	Y	D	G	K	Y	0	0	0	3	0	0	0	3	1	3	2	1	0	0	2	0	0	2	1	1	0	0	19	0	2193.13	Q3U5I8;Q8QZY7;O35375-5;O35375-6;O35375-2;O35375-3;O35375-4;O35375	Q3U5I8	210	228	Nrp2	Neuropilin-2	yes	no	3	0.001039	69.081		By MS/MS		By matching	By matching
YFDSFGDLSSASAIMGNAK	VVYPWTQRYFDSFGDL	SAIMGNAKVKAHGKKV	R	Y	F	A	K	V	3	0	1	2	0	0	0	2	0	1	1	1	1	2	0	4	0	0	1	0	0	0	19	0	1979.89	A8DUK0;P02088;A8DUL5;A8DUP5;A8DUP7;A8DUM2;A8DUP3;A8DUK2;B1Q450;A8DUK7;A8DUK4;E9Q223;A8DUP0;A8DUL2;A8DUL0;A8DUL7	A8DUK0	42	60	Hbbt1;Hbb-b1;HBB1;Hbb-bs	Hemoglobin subunit beta-1	no	no	2	0.0015135	85.937					By MS/MS
YFDSFGDLSSASAIMGNPK	VVYPWTQRYFDSFGDL	SAIMGNPKVKAHGKKV	R	Y	F	P	K	V	2	0	1	2	0	0	0	2	0	1	1	1	1	2	1	4	0	0	1	0	0	0	19	0	2005.91	Q54AH9;Q549D9;A8DV59;A8DV41;P02089;Q9QUN8;D0U293	Q54AH9	41	59	Hbb-b2;Hbbt2	Hemoglobin subunit beta-2	yes	no	2	0.010641	60.062			By matching
YGVNQLEEMLRPLVEAGLR	ASLPGVARYGVNQLEE	PLVEAGLRCVLIFGVP	R	Y	G	L	R	C	1	2	1	0	0	1	3	2	0	0	4	0	1	0	1	0	0	0	1	2	0	0	19	1	2186.15	Q8VCZ1;Q9DD05;P10518	Q8VCZ1	56	74	Alad	Delta-aminolevulinic acid dehydratase	yes	no	3	4.7514e-10	188.27					By MS/MS
YHTSQSGDEMTSLSEYVSR	RRLSELLRYHTSQSGD	SLSEYVSRMKETQKSI	R	Y	H	S	R	M	0	1	0	1	0	1	2	1	1	0	1	0	1	0	0	5	2	0	2	1	0	0	19	0	2175.94	Q71LX8;P11499;Q80YC2;Q811H6;E9Q0C3	Q71LX8	457	475	Hsp90ab1	Heat shock protein HSP 90-beta	yes	no	3	0.0076488	58.123			By matching
YMNSGPVVAMVWEGLNVVK	PFFPGLVKYMNSGPVV	WEGLNVVKTGRVMLGE	K	Y	M	V	K	T	1	0	2	0	0	0	1	2	0	0	1	1	2	0	1	1	0	1	1	5	0	0	19	0	2092.05	Q5NC82;E9PZF0;Q01768;B0LAA8;Q8R4B4	Q5NC82	67	85	Nme2;Gm20390	Nucleoside diphosphate kinase;Nucleoside diphosphate kinase B	yes	no	3	6.279e-06	117.3		By matching			By MS/MS
YNEDLELEDAIHTAILTLK	GKTFLEKRYNEDLELE	HTAILTLKESFEGQMT	R	Y	N	L	K	E	2	0	1	2	0	0	3	0	1	2	4	1	0	0	0	0	2	0	1	0	0	0	19	0	2200.13	Q8BKE0;Q9CZ58;Q3UWT6;P49722	Q8BKE0	127	145	Psma2	Proteasome subunit alpha type;Proteasome subunit alpha type-2	yes	no	3	6.4844e-06	148.26	By MS/MS				By MS/MS
AGPEEVPTAASSSHFHAGYK	EEAVAREKAGPEEVPT	SHFHAGYKAIQKDDGQ	K	A	G	Y	K	A	4	0	0	0	0	0	2	2	2	0	0	1	0	1	2	3	1	0	1	1	0	0	20	0	2041.95	P26339;Q3UN28	P26339	252	271	Chga	Chromogranin-A;Pancreastatin;Beta-granin;WE-14;Catestatin;GE-25;Serpinin-RRG;Serpinin;p-Glu serpinin precursor	yes	no	3;4	7.8201e-06	149.95	By matching		By MS/MS		By matching
AITHPNWNANTMNNDLTLLK	VQVLSIARAITHPNWN	NNDLTLLKLASPARYT	R	A	I	L	K	L	2	0	5	1	0	0	0	0	1	1	3	1	1	0	1	0	3	1	0	0	0	0	20	0	2280.13	Q9ER05;Q9D7P8;Q9D960	Q9ER05	107	126	Ctrl		yes	no	3	1.4844e-05	102.98	By matching
ARPFPDGLAEDIDKGEVSAR	KHNRLYMKARPFPDGL	DKGEVSARQELKARAR	K	A	R	A	R	Q	3	2	0	3	0	0	2	2	0	1	1	1	0	1	2	1	0	0	0	1	0	0	20	2	2142.07	Q8C153;Q3UZ14;Q3UMI7;Q3UDC8;Q3TX47;Q3TWX1;Q3TLB1;Q3TJZ1;P58252;Q6P9L9;Q8BMA8;Q3TW58;Q3UBL9;Q3TK17;Q3TSK4;Q3TPG2;Q99LT6;Q61509	Q8C153	606	625	Eef2	Elongation factor 2	yes	no	3;4	9.8391e-16	209.71					By matching
EENVGLHQTLDQTLNELNCI	EEKLAQAKEENVGLHQ	TLNELNCI________	K	E	E	C	I	-	0	0	3	1	1	2	3	1	1	1	4	0	0	0	0	0	2	0	0	1	0	0	20	0	2339.11	Q6IRU2	Q6IRU2	229	248	Tpm4	Tropomyosin alpha-4 chain	yes	yes	2	5.7354e-06	92.474					By MS/MS
EESSPDYNPYQGVSVPLQLK	KLRQQAHREESSPDYN	VSVPLQLKENGEESHL	R	E	E	L	K	E	0	0	1	1	0	2	2	1	0	0	2	1	0	0	3	3	0	0	2	2	0	0	20	0	2249.09	Q03517;Q4W8U9	Q03517	72	91	Scg2	Secretogranin-2;Secretoneurin;Manserin	yes	no	2;3	3.1845e-05	120.33					By MS/MS
EFQLDQHLFDPEHDYPGLGK	PDTAEFSREFQLDQHL	HDYPGLGKWNKKLLYE	R	E	F	G	K	W	0	0	0	3	0	2	2	2	2	0	3	1	0	2	2	0	0	0	1	0	0	0	20	0	2384.11	Q3TT51;P12961	Q3TT51	143	162	Scg5	Neuroendocrine protein 7B2;N-terminal peptide;C-terminal peptide	yes	no	3;4	1.7253e-06	163.15	By MS/MS	By matching	By MS/MS	By MS/MS	By MS/MS
EILVGDVGQTVDDPYTTFVK	NIILEEGKEILVGDVG	DPYTTFVKMLPDKDCR	K	E	I	V	K	M	0	0	0	3	0	1	1	2	0	1	1	1	0	1	1	0	3	0	1	4	0	0	20	0	2195.1	Q544Y7;P18760;F8WGL3;Q9CX22	Q544Y7	54	73	Cfl1	Cofilin-1	yes	no	2;3	2.1023e-05	143.57			By matching		By matching
EWTLMLHGTQSAPYIDQVVR	APQKGLLKEWTLMLHG	PYIDQVVRDYQSKLAM	K	E	W	V	R	D	1	1	0	1	0	2	1	1	1	1	2	0	1	0	1	1	2	1	1	2	0	0	20	0	2343.17	Q3UZV3;Q547J8;Q3TYM6;Q3TT48;P21661	Q3UZV3	567	586	Pcsk2	Neuroendocrine convertase 2	yes	no	3	6.0204e-22	214.59	By MS/MS				By MS/MS
EYDDNGEGITIFRPLHLANK	TNIESLVKEYDDNGEG	RPLHLANKFEDKTVAY	K	E	Y	N	K	F	1	1	2	2	0	0	2	2	1	2	2	1	0	1	1	0	1	0	1	0	0	0	20	1	2301.14	P27773	P27773	195	214	Pdia3	Protein disulfide-isomerase A3	yes	yes	4	0.0012482	67.644					By MS/MS
FTASAGIQVVGDDLTVTNPK	DDWGAWQKFTASAGIQ	DLTVTNPKRIAKAASE	K	F	T	P	K	R	2	0	1	2	0	1	0	2	0	1	1	1	0	1	1	1	3	0	0	3	0	0	20	0	2032.05	Q5FW97;P17182;Q6PHC1	Q5FW97	307	326	EG433182;Eno1	Alpha-enolase	yes	no	2	1.3909e-05	145.88	By matching		By MS/MS
GMYGIENEVFLSLPCILNAR	HPVSTMVKGMYGIENE	LPCILNARGLTSVINQ	K	G	M	A	R	G	1	1	2	0	1	0	2	2	0	2	3	0	1	1	1	1	0	0	1	1	0	0	20	0	2295.14	P16125;Q5M8R7	P16125	280	299	Ldhb	L-lactate dehydrogenase B chain	yes	no	3	1.9821e-06	136.88		By MS/MS		By MS/MS	By MS/MS
HADGSFSDEMSTILDNLATR	IAEELGRRHADGSFSD	ILDNLATRDFINWLIQ	R	H	A	T	R	D	2	1	1	3	0	0	1	1	1	1	2	0	1	1	0	3	2	0	0	0	0	0	20	0	2178.99	P55095;A2AS86	P55095	146	165	Gcg	Glucagon;Glicentin;Glicentin-related polypeptide;Oxyntomodulin;Glucagon;Glucagon-like peptide 1;Glucagon-like peptide 1(7-37);Glucagon-like peptide 1(7-36);Glucagon-like peptide 2	yes	no	3	1.9301e-52	262.74	By MS/MS		By MS/MS		By MS/MS
HAEGTFTSDVSSYLEGQAAK	KRHDEFERHAEGTFTS	YLEGQAAKEFIAWLVK	R	H	A	A	K	E	3	0	0	1	0	1	2	2	1	0	1	1	0	1	0	3	2	0	1	1	0	0	20	0	2096.97	P55095;A2AS86	P55095	98	117	Gcg	Glucagon;Glicentin;Glicentin-related polypeptide;Oxyntomodulin;Glucagon;Glucagon-like peptide 1;Glucagon-like peptide 1(7-37);Glucagon-like peptide 1(7-36);Glucagon-like peptide 2	yes	no	2;3	5.2283e-176	389.89	By MS/MS		By MS/MS	By matching	By MS/MS
HIIVACEGNPYVPVHFDATV	YKTTQYQKHIIVACEG	PVHFDATV________	K	H	I	T	V	-	2	0	1	1	1	0	1	1	2	2	0	0	0	1	2	0	1	0	1	4	0	0	20	0	2237.09	Q8K2T2;Q8C6G3;W0UVC3;P00683	Q8K2T2	130	149	Rnase1;Rac1	Ribonuclease pancreatic	yes	no	3	0.0004492	71.601	By MS/MS	By MS/MS	By MS/MS	By matching
IGEHTPSALAIMENANVLAR	AKWRCVLKIGEHTPSA	ENANVLARYASICQQN	K	I	G	A	R	Y	4	1	2	0	0	0	2	1	1	2	2	0	1	0	1	1	1	0	0	1	0	0	20	0	2106.09	Q5FWB7;A6ZI44;P05064;Q6NY00;D3YWI1;A0A0U1RPN8	Q5FWB7	154	173	Aldoa	Fructose-bisphosphate aldolase;Fructose-bisphosphate aldolase A	yes	no	3	4.7118e-05	92.633
IGPILDNSTLQSEVKPILEK	NVAKSLQKIGPILDNS	EVKPILEKLTQDQDVD	K	I	G	E	K	L	0	0	1	1	0	1	2	1	0	3	3	2	0	0	2	2	1	0	0	1	0	0	20	1	2193.23	Q8C2E1;Q7TMX2;Q76MZ3	Q8C2E1	547	566	Ppp2r1a	Serine/threonine-protein phosphatase 2A 65 kDa regulatory subunit A alpha isoform	yes	no	3	0.00056552	69.975			By matching		By matching
IPIFSAAGLPHNEIAAQICR	NSIARGQKIPIFSAAG	EIAAQICRQAGLVKKS	K	I	P	C	R	Q	4	1	1	0	1	1	1	1	1	4	1	0	0	1	2	1	0	0	0	0	0	0	20	0	2177.14	P62814;A0A0U1RNU9;Q99KA3;Q6P6I3;Q91YH6;Q8C3L6	P62814	189	208	Atp6v1b2;Atp6v1b1	V-type proton ATPase subunit B, brain isoform	yes	no	3	2.297e-06	122.49					By MS/MS
KLQTAVSQQPNKDVVEQMEK	KALQSEVRKLQTAVSQ	DVVEQMEKCIQEKDEK	R	K	L	E	K	C	1	0	1	1	0	4	2	0	0	0	1	3	1	0	1	1	1	0	0	3	0	0	20	2	2299.18	Q61595-2;Q61595-12;Q61595-16;Q61595-3;Q61595-14;Q61595-6;Q61595-4;Q61595-9;Q61595-8;Q61595-13;Q61595-5;Q61595-15;Q61595-10;Q61595-7;Q61595-11;Q61595	Q61595-2	719	738	Ktn1	Kinectin	yes	no	3	0.016472	48.616	By matching	By MS/MS		By MS/MS
KPADITDVVKPIDLPTEEPK	DLMLLRLKKPADITDV	DLPTEEPKLGSTCLAS	K	K	P	P	K	L	1	0	0	3	0	0	2	0	0	2	1	3	0	0	4	0	2	0	0	2	0	0	20	2	2204.19	A0A0B6VSQ6;P15947;A0A0U1RPN5;P15945	A0A0B6VSQ6	128	147	Klk1;Klk1b5	Kallikrein-1;Kallikrein 1-related peptidase b5	yes	no	3	0.023504	48.196	By matching		By matching
LGEHNIDALEGGEQFIDAAK	YKSRIQVRLGEHNIDA	EQFIDAAKIIRHPNYN	R	L	G	A	K	I	3	0	1	2	0	1	3	3	1	2	2	1	0	1	0	0	0	0	0	0	0	0	20	0	2126.03	Q9D7Y7;Q9CPN9	Q9D7Y7	74	93	2210010C04Rik		yes	no	2;3	3.2557e-06	115.88	By MS/MS		By matching
LGEHNINVLEGNEQFVNSAK	YKSRIQVRLGEHNINV	EQFVNSAKIIKHPNFN	R	L	G	A	K	I	1	0	4	0	0	1	3	2	1	1	2	1	0	1	0	1	0	0	0	2	0	0	20	0	2211.09	Q9R0T7;Q9QUK9;Q3V2E0	Q9R0T7	73	92	Try4;Try5		yes	no	2;3	6.1411e-41	258.5	By MS/MS		By MS/MS
LIVDEAINEDNSVVSLSQPK	KQKNRPNRLIVDEAIN	VVSLSQPKMDELQLFR	R	L	I	P	K	M	1	0	2	2	0	1	2	0	0	2	2	1	0	0	1	3	0	0	0	3	0	0	20	0	2169.12	Q01853	Q01853	26	45	Vcp	Transitional endoplasmic reticulum ATPase	yes	yes	2;3	5.3553e-06	113.54			By matching
LMNESLMLVTALNPHIGYDK	ANTERINKLMNESLML	NPHIGYDKAAKIAKTA	K	L	M	D	K	A	1	0	2	1	0	0	1	1	1	1	4	1	2	0	1	1	1	0	1	1	0	0	20	0	2258.14	P97807-2;P97807;H3BKG7	P97807-2	405	424	Fh;Fh1	Fumarate hydratase, mitochondrial	yes	no	3	8.3098e-06	152.66					By MS/MS
LYSLHPDPIATWLVPDPSQK	SGSSEEKKLYSLHPDP	LVPDPSQKQNLLAPQN	K	L	Y	Q	K	Q	1	0	0	2	0	1	0	0	1	1	3	1	0	0	4	2	1	1	1	1	0	0	20	0	2276.18	D3Z513;D3Z4N2;Q547B5;Q3TND2;Q6PKE3;Q3TLP1;F8WIP8;P10923	D3Z513	32	51	Spp1	Osteopontin	yes	no	3	0.0019008	65.423			By MS/MS
NKDGHINVQELGDVMKQLGK	RPFFWLDKNKDGHINV	DVMKQLGKNLSHEELK	K	N	K	G	K	N	0	0	2	2	0	2	1	3	1	1	2	3	1	0	0	0	0	0	0	2	0	0	20	2	2222.15	B9EI00	B9EI00	23	42	Calm5		yes	yes	2	0.011966	50.392
NLALCPANHAPLQEAAVIPR	KATIGLIRNLALCPAN	QEAAVIPRLVQLLVKA	R	N	L	P	R	L	5	1	2	0	1	1	1	0	1	1	3	0	0	0	3	0	0	0	0	1	0	0	20	0	2154.14	Q02257	Q02257	507	526	Jup	Junction plakoglobin	yes	yes	3	7.3023e-06	154.26	By MS/MS		By MS/MS
NLDHGVLLVGYGYEGTDSNK	YEPNCSSKNLDHGVLL	YEGTDSNKNKYWLVKN	K	N	L	N	K	N	0	0	2	2	0	0	1	4	1	0	3	1	0	0	0	1	1	0	2	2	0	0	20	0	2150.03	Q3UWH6;Q9D0C0;Q543M3;Q3UHZ4;Q3U5U9;Q3TVJ1;Q3TT75;Q3TNC8;P06797;Q6LAF5	Q3UWH6	247	266	Ctsl	Cathepsin L1;Cathepsin L1 heavy chain;Cathepsin L1 light chain	yes	no	3	3.3518e-06	124.69			By MS/MS
QLSEENANLQEYVEKETQEK	DQNTVVTRQLSEENAN	VEKETQEKKRLSRTNE	R	Q	L	E	K	K	1	0	2	0	0	3	6	0	0	0	2	2	0	0	0	1	1	0	1	1	0	0	20	1	2408.13	D3YUM9;D3YZ69;Q3UHD3-4;Q3UHD3-3;Q3UHD3	D3YUM9	120	139	Mtus2	Microtubule-associated tumor suppressor candidate 2 homolog	yes	no	3	0.0071062	58.024	By MS/MS
TALYDESCSSTLASTFSNGR	NSAINDGRTALYDESC	ASTFSNGRKRNPEAGV	R	T	A	G	R	K	2	1	1	1	1	0	1	1	0	0	2	0	0	1	0	5	3	0	1	0	0	0	20	0	2165.95	Q3UZV3;Q547J8;Q3TYM6;Q3TT48;P21661	Q3UZV3	321	340	Pcsk2	Neuroendocrine convertase 2	yes	no	2;3	1.1351e-29	236.16	By MS/MS		By MS/MS		By MS/MS
TIGGGDDSFNTFFSETGAGK	DGQMPSDKTIGGGDDS	FSETGAGKHVPRAVFV	K	T	I	G	K	H	1	0	1	2	0	0	1	5	0	1	0	1	0	3	0	2	3	0	0	0	0	0	20	0	2006.89	P05213;O89052;P68369;Q52L87;Q3TIZ0;P68373;Q5FW91;P05214	P05213	41	60	Tuba1b;Tuba1a;Tuba1c;Tuba3a	Tubulin alpha-1B chain;Tubulin alpha-1A chain;Tubulin alpha-1C chain;Tubulin alpha-3 chain	no	no	2;3	6.2855e-06	142.43	By matching		By matching		By MS/MS
TIGGGDDSFTTFFCETGAGK	DGQMPSDKTIGGGDDS	FCETGAGKHVPRAVFV	K	T	I	G	K	H	1	0	0	2	1	0	1	5	0	1	0	1	0	3	0	1	4	0	0	0	0	0	20	0	2066.89	A0A0A0MQA5;P68368;A0A087WRB4;A0A087WQS4;A0A087WSB0;A0A087WSL5;A0A087WS35	A0A0A0MQA5	70	89	Tuba4a	Tubulin alpha-4A chain	yes	no	2	1.4819e-05	136.49		By MS/MS		By matching	By MS/MS
TLGTPEFVTATDCVHYFEWR	SITFLCGKTLGTPEFV	CVHYFEWRTTAACKKD	K	T	L	W	R	T	1	1	0	1	1	0	2	1	1	0	1	0	0	2	1	0	4	1	1	2	0	0	20	0	2428.12	B9EKB8;B7ZWC4;Q07113	B9EKB8	132	151	Igf2r	Cation-independent mannose-6-phosphate receptor	yes	no	3	1.8953e-10	184.15	By MS/MS	By MS/MS		By MS/MS	By MS/MS
VAMANIQPQMLVAGATSIAR	KKDLDKCKVAMANIQP	AGATSIARRANRILLV	K	V	A	A	R	R	5	1	1	0	0	2	0	1	0	2	1	0	2	0	1	1	1	0	0	2	0	0	20	0	2041.08	Q64727	Q64727	739	758	Vcl	Vinculin	yes	yes	2;3	2.0897e-06	103.9		By MS/MS		By MS/MS
VDNALQSGNSQESVTEQDSK	REAKVQWKVDNALQSG	SVTEQDSKDSTYSLSS	K	V	D	S	K	D	1	0	2	2	0	3	2	1	0	0	1	1	0	0	0	4	1	0	0	2	0	0	20	0	2134.96	A0A097PUD0;A0A097PUG4	A0A097PUD0	171	190			yes	no	2	3.6927e-40	247.36			By MS/MS
VGPSATHLEDEEGVQALMAK	IAEWLRRRVGPSATHL	GVQALMAKWDMVVIGF	R	V	G	A	K	W	3	0	0	1	0	1	3	2	1	0	2	1	1	0	1	1	1	0	0	2	0	0	20	0	2081.01	D3Z6P0-2;D3Z6P0;F6S5U2	D3Z6P0-2	154	173	Pdia2	Protein disulfide-isomerase A2	yes	no	3	9.0755e-10	159.01			By matching
VNNSSLIGLGYTQTLKPGIK	PDACFSAKVNNSSLIG	QTLKPGIKLTLSALLD	K	V	N	I	K	L	0	0	2	0	0	1	0	3	0	2	3	2	0	0	1	2	2	0	1	1	0	0	20	1	2102.17	Q3U6K8;Q3TIG8;Q3THL7;Q60932-2;Q60932	Q3U6K8	237	256	Vdac1	Voltage-dependent anion-selective channel protein 1	yes	no	3	0.00077768	69.361
VVDSLQLTGTKPVATPVDWK	RNFDEILRVVDSLQLT	VATPVDWKKGESVMVV	R	V	V	W	K	K	1	0	0	2	0	1	0	1	0	0	2	2	0	0	2	1	3	1	0	4	0	0	20	1	2153.17	Q53ZU7;O08709;Q6GT24;D3Z0Y2;Q6A0D0;Q8BPD3	Q53ZU7	163	182	Prdx6	Peroxiredoxin-6	yes	no	3	3.8004e-06	149.53			By matching		By MS/MS
AHFSISNSAEDPFIAIHADSK	VNVGSDGKAHFSISNS	IAIHADSKL_______	K	A	H	S	K	L	4	0	1	2	0	0	1	0	2	3	0	1	0	2	1	4	0	0	0	0	0	0	21	0	2256.08	Q8C5B4;Q61298;P00688	P00688	487	507	Amy2	Alpha-amylase;Pancreatic alpha-amylase	no	no	2;3;4	6.6744e-23	213.93	By MS/MS	By MS/MS	By MS/MS		By MS/MS
ASDPPLAPDDDPDAPAAQLAR	LRAWGSPRASDPPLAP	APAAQLARALLRARLD	R	A	S	A	R	A	6	1	0	5	0	1	0	0	0	0	2	0	0	0	5	1	0	0	0	0	0	0	21	0	2101.99	Q9QXV0	Q9QXV0	118	138	Pcsk1n	ProSAAS;KEP;Big SAAS;Little SAAS;Big PEN-LEN;PEN;PEN-20;PEN-19;Little LEN;Big LEN	yes	yes	2	2.0863e-05	100.28	By MS/MS				By MS/MS
ASVPEGFLSELTQQLAQATGK	IVNTNVPRASVPEGFL	QLAQATGKPAQYIAVH	R	A	S	G	K	P	3	0	0	0	0	3	2	2	0	0	3	1	0	1	1	2	2	0	0	1	0	0	21	0	2174.12	Q545F0;P34884	Q545F0	13	33	Mif	Macrophage migration inhibitory factor	yes	no	2;3	1.0277e-05	99.407					By MS/MS
DFSALESQLQDTQELLQEENR	SKSSKLTKDFSALESQ	ELLQEENRQKLSLSTK	K	D	F	N	R	Q	1	1	1	2	0	4	4	0	0	0	4	0	0	1	0	2	1	0	0	0	0	0	21	0	2492.17	Q8VDD5;Q3UFT0;O89055	Q8VDD5	1302	1322	Myh9	Myosin-9	yes	no	3	0.00015992	79.467
DGPLNMILDDGGDLTNLIHTK	IEQTLHFKDGPLNMIL	LTNLIHTKYPQLLSGI	K	D	G	T	K	Y	0	0	2	4	0	0	0	3	1	2	4	1	1	0	1	0	2	0	0	0	0	0	21	0	2251.12	Q8BPI7;Q5M9P0;Q3U5U5;Q3U4D1;Q3TF14;P50247	Q8BPI7	14	34	Ahcy	Adenosylhomocysteinase	yes	no	3	3.4433e-09	180.63		By MS/MS		By MS/MS	By MS/MS
DLYANTVLSGGTTMYPGLADR	KCDVDIRKDLYANTVL	MYPGLADRMQKEITAL	K	D	L	D	R	M	2	1	1	2	0	0	0	3	0	0	3	0	1	0	1	1	3	0	2	1	0	0	21	0	2214.06	Q9QZ83	Q9QZ83	296	316	Actg1		yes	yes	2;3	1.2322e-41	252.4	By MS/MS	By MS/MS	By MS/MS	By MS/MS	By MS/MS
ELEKPEESDSNASWTTQMSKK	LSSTDPGKELEKPEES	WTTQMSKKEKRRRKRQ	K	E	L	K	K	E	1	0	1	1	0	1	4	0	0	0	1	3	1	0	1	4	2	1	0	0	0	0	21	2	2424.11	F7A6H4;E9Q555	F7A6H4	72	92	Rnf213	E3 ubiquitin-protein ligase RNF213	yes	no	3	0.004945	58.693	By MS/MS		By MS/MS
ETAIELGYLTAEQFDEWVKPK	HKNGSTLKETAIELGY	FDEWVKPKDMLGPK__	K	E	T	P	K	D	2	0	0	1	0	1	4	1	0	1	2	2	0	1	1	0	2	1	1	1	0	0	21	1	2466.23	P97807-2;P97807;H3BKG7	P97807-2	441	461	Fh;Fh1	Fumarate hydratase, mitochondrial	yes	no	3	0.012056	50.226	By matching	By matching	By matching	By matching	By matching
FDGALNVDLTEFQTNLVPYPR	SSITASLRFDGALNVD	TNLVPYPRIHFPLATY	R	F	D	P	R	I	1	1	2	2	0	1	1	1	0	0	3	0	0	2	2	0	2	0	1	2	0	0	21	0	2408.2	P05213;Q99KA2;P68369;Q52L87;Q3TIZ0;P68373;Q5FW91;P05214;Q9D9Y2;Q9JJZ2;A0A0A0MQA5;P68368	P05213	244	264	Tuba1b;Tuba1a;Tuba1c;Tuba3a;Tuba8;Tuba4a	Tubulin alpha-1B chain;Tubulin alpha-1A chain;Tubulin alpha-1C chain;Tubulin alpha-3 chain;Tubulin alpha-8 chain;Tubulin alpha-4A chain	no	no	3	2.2645e-06	131.54
GFGGVQVSPPNENVVVHNPSR	CERYLAPKGFGGVQVS	VVVHNPSRPWWERYQP	K	G	F	S	R	P	0	1	3	0	0	1	1	3	1	0	0	0	0	1	3	2	0	0	0	5	0	0	21	0	2189.1	Q8C5B4;E9PV85;P00688	P00688	51	71	Amy2a1;Amy2	Alpha-amylase;Pancreatic alpha-amylase	no	no	2;3	1.9061e-06	149.12	By MS/MS		By MS/MS
GIVDQCCTSICSLYQLENYCN	LEVAQQKRGIVDQCCT	YQLENYCN________	R	G	I	C	N	-	0	0	2	1	4	2	1	1	0	2	2	0	0	0	0	2	1	0	2	1	0	0	21	0	2596.07	Q545I7;P01325;Q5EEX1;P01326;E0CXX7	Q5EEX1	90	110	Ins1;Ins2	Insulin-1;Insulin-1 B chain;Insulin-1 A chain;Insulin-2;Insulin-2 B chain;Insulin-2 A chain	no	no	2;3	2.642e-05	92.563	By MS/MS		By MS/MS
GPIMLDEVECTGTESSLASCR	RAAFGPGKGPIMLDEV	ESSLASCRSLGWMVSR	K	G	P	C	R	S	1	1	0	1	2	0	3	2	0	1	2	0	1	0	1	3	2	0	0	1	0	0	21	0	2311.01	Q07797;E9Q5X5	Q07797	84	104	Lgals3bp	Galectin-3-binding protein	yes	no	2;3	1.1014e-06	160.76			By MS/MS
GTGGVDTAAVGGVFDVSNADR	KRLRLQKRGTGGVDTA	FDVSNADRLGFSEVEL	R	G	T	D	R	L	3	1	1	3	0	0	0	5	0	0	0	0	0	1	0	1	2	0	0	4	0	0	21	0	1963.92	Q04447	Q04447	321	341	Ckb	Creatine kinase B-type	yes	yes	2	8.3091e-12	195.86					By MS/MS
IVNGEDAIPGSWPWQVSLQDR	PVLTGLSRIVNGEDAI	WQVSLQDRTGFHFCGG	R	I	V	D	R	T	1	1	1	2	0	2	1	2	0	2	1	0	0	0	2	2	0	2	0	2	0	0	21	0	2366.17	Q9CR35	Q9CR35	34	54	Ctrb1	Chymotrypsinogen B;Chymotrypsin B chain A;Chymotrypsin B chain B;Chymotrypsin B chain C	yes	yes	2;3	9.3064e-07	129.75	By MS/MS	By MS/MS	By MS/MS	By MS/MS	By MS/MS
LGEIVTTIPTIGFNVETVEYK	TTILYKLKLGEIVTTI	NVETVEYKNICFTVWD	K	L	G	Y	K	N	0	0	1	0	0	0	3	2	0	3	1	1	0	1	1	0	4	0	1	3	0	0	21	0	2322.24	Q14BR4;Q9DD04;P61750;P84084;Q3U344;Q8BSL7;P84078;P61205	Q14BR4	39	59	Arf4;Arf5;Arf3;Arf2;Arf1	ADP-ribosylation factor 4;ADP-ribosylation factor 5;ADP-ribosylation factor 2;ADP-ribosylation factor 1;ADP-ribosylation factor 3	no	no	2;3	3.6791e-06	107.02
LHDVNNDGFLDEQELEALFTR	FDPKTFFKLHDVNNDG	ELEALFTRELEKVYNP	K	L	H	T	R	E	1	1	2	3	0	1	3	1	1	0	4	0	0	2	0	0	1	0	0	1	0	0	21	0	2474.17	Q3UKN6;P81117	Q3UKN6	252	272	Nucb2	Nucleobindin-2;Nesfatin-1	yes	no	3	3.5471e-16	199.97					By MS/MS
LSATSTWLEDEGFGATTVMLK	QREEISGKLSATSTWL	GATTVMLKDKLAELRK	K	L	S	L	K	D	2	0	0	1	0	0	2	2	0	0	3	1	1	1	0	2	4	1	0	1	0	0	21	0	2256.1	Q9JKR6	Q9JKR6	775	795	Hyou1	Hypoxia up-regulated protein 1	yes	yes	2	0.010407	55.128					By MS/MS
LTESPCALVASQYGWSGNMER	EKAVVSQRLTESPCAL	GWSGNMERIMKAQAYQ	R	L	T	E	R	I	2	1	1	0	1	1	2	2	0	0	2	0	1	0	1	3	1	1	1	1	0	0	21	0	2355.06	Q91V38;Q3UAD6;P08113;Q3UBU0;Q3TUD6;Q8CCY5;F7C312	Q91V38	640	660	Hsp90b1	Endoplasmin	yes	no	2	4.8791e-06	157.14					By MS/MS
LVDDQQLHLNAEDIENLDAAK	SNSICLFRLVDDQQLH	IENLDAAKLSRFIHVN	R	L	V	A	K	L	3	0	2	4	0	2	2	0	1	1	4	1	0	0	0	0	0	0	0	1	0	0	21	0	2363.16	Q9D8U3;Q9D8Q5	Q9D8U3	111	131	Erp27	Endoplasmic reticulum resident protein 27	yes	no	3	7.9498e-06	100.53	By matching		By MS/MS
LYGSGGPPPTGEEDTSEKDEL	IVQPIISKLYGSGGPP	DTSEKDEL________	K	L	Y	E	L	-	0	0	0	2	0	0	4	4	0	0	2	1	0	0	3	2	2	0	1	0	0	0	21	1	2176.96	Q3U9G2;Q3TWF2;P20029;Q9DC41;Q3TKF8;Q3TI47;Q3U6V3	Q3U9G2	635	655	Hspa5	78 kDa glucose-regulated protein	yes	no	2	0.0039511	71.853
NINADEAAAMGAVYQAAALSK	VGKEELGKNINADEAA	YQAAALSKAFKVKPFV	K	N	I	S	K	A	8	0	2	1	0	1	1	1	0	1	1	1	1	0	0	1	0	0	1	1	0	0	21	0	2078.01	Q9JKR6;Q8VCI2	Q9JKR6	408	428	Hyou1	Hypoxia up-regulated protein 1	yes	no	2;3	2.1847e-05	93.804
NWDAAFGMPGASSNPCSETYR	CVGVDPNRNWDAAFGM	NPCSETYRGKFPNSEV	R	N	W	Y	R	G	3	1	2	1	1	0	1	2	0	0	0	0	1	1	2	3	1	1	1	0	0	0	21	0	2316.95	Q7TPZ8	Q7TPZ8	256	276	Cpa1	Carboxypeptidase A1	yes	yes	2	9.892e-06	105.96			By matching
PGGLLLGDEAPNFEANTTIGR	________________	EANTTIGRIRFHDFLG	M	P	G	G	R	I	2	1	2	1	0	0	2	4	0	1	3	0	0	1	2	0	2	0	0	0	0	0	21	0	2141.08	Q53ZU7;O08709;Q6GT24;A0A0A6YXQ7	Q53ZU7	2	22	Prdx6	Peroxiredoxin-6	yes	no	2;3	5.9519e-23	223.5		By matching		By matching	By MS/MS
SGLGELILPENEPGSSIMPGK	RFLGSGPRSGLGELIL	GSSIMPGKVNPTQCEA	R	S	G	G	K	V	0	0	1	0	0	0	3	4	0	2	3	1	1	0	3	3	0	0	0	0	0	0	21	0	2124.08	P97807-2;P97807	P97807-2	308	328	Fh	Fumarate hydratase, mitochondrial	yes	no	2	0.00082899	70.126					By matching
SGTAHEYSSCPDDAIFQSLAR	NYPYDETRSGTAHEYS	AIFQSLARAYSSFNPV	R	S	G	A	R	A	3	1	0	2	1	1	1	1	1	1	1	0	0	1	1	4	1	0	1	0	0	0	21	0	2311.02	Q543R4;Q00493	Q543R4	263	283	Cpe	Carboxypeptidase E	yes	no	2;3	1.1778e-41	252.77	By MS/MS		By MS/MS		By MS/MS
SYDVPPPPMEPDHPFYSNISK	AQVKIWRRSYDVPPPP	PFYSNISKDRRYADLT	R	S	Y	S	K	D	0	0	1	2	0	0	1	0	1	1	0	1	1	1	6	3	0	0	2	1	0	0	21	0	2416.1	Q3U7Z6;Q9DBJ1;Q6NWV5	Q3U7Z6	118	138	Pgam1	Phosphoglycerate mutase 1	yes	no	3	2.2214e-05	93.626					By MS/MS
TVPDKVQGISVSNSARSDYLK	SHSFTEERTVPDKVQG	SARSDYLKVSWVHATG	R	T	V	L	K	V	1	1	1	2	0	1	0	1	0	1	1	2	0	0	1	4	1	0	1	3	0	0	21	2	2263.18	B2RU80	B2RU80	730	750	Ptprb	Receptor-type tyrosine-protein phosphatase beta	yes	yes	2;3	0.0020262	69.747	By MS/MS	By MS/MS		By MS/MS	By MS/MS
VAVPFSPAVGVDFELESFSER	GYLAITKKVAVPFSPA	ELESFSERKEEEKEEL	K	V	A	E	R	K	2	1	0	1	0	0	3	1	0	0	1	0	0	3	2	3	0	0	0	4	0	0	21	0	2281.13	Q543R4;Q00493	Q543R4	435	455	Cpe	Carboxypeptidase E	yes	no	3	1.213e-06	129.02	By matching				By MS/MS
VESVFETLVEDSPEEESTLTK	SGVLSLDRVESVFETL	EEESTLTKLGNTISSL	R	V	E	T	K	L	0	0	0	1	0	0	6	0	0	0	2	1	0	1	1	3	3	0	0	3	0	0	21	0	2367.12	Q9JKR6	Q9JKR6	556	576	Hyou1	Hypoxia up-regulated protein 1	yes	yes	2;3	1.5086e-06	139.11			By matching		By MS/MS
VIISAPSADAPMFVMGVNHEK	HLKGGAKRVIISAPSA	VMGVNHEKYDNSLKIV	R	V	I	E	K	Y	3	0	1	1	0	0	1	1	1	2	0	1	2	1	2	2	0	0	0	3	0	0	21	0	2212.1	S4R257;D2KHZ9;A0A0A0MQF6;P16858;S4R1W1;D3YYI5;Q6IWE3	S4R257	74	94	Gapdh;GAPDH;Gm3839;Gm7293;Gapd	Glyceraldehyde-3-phosphate dehydrogenase	yes	no	3	5.1974e-07	154.55	By MS/MS		By MS/MS
VVGTMDVLTLQENIMNITFCK	LGAIDVDKVVGTMDVL	IMNITFCKLENEKCPY	K	V	V	C	K	L	0	0	2	1	1	1	1	1	0	2	2	1	2	1	0	0	3	0	0	3	0	0	21	0	2425.21	Q3V0F6	Q3V0F6	65	85	Gm7337		yes	yes	3	0.0084342	48.288				By MS/MS
WGEAGAEYVVESTGVFTTMEK	ERDPTNIKWGEAGAEY	GVFTTMEKAGAHLKGG	K	W	G	E	K	A	2	0	0	0	0	0	4	3	0	0	0	1	1	1	0	1	3	1	1	3	0	0	21	0	2290.05	S4R257;D2KHZ9;A0A0A0MQF6;P16858;S4R1W1	S4R257	42	62	Gapdh;GAPDH;Gm3839	Glyceraldehyde-3-phosphate dehydrogenase	yes	no	3	0.00028441	72.883
AGAIAPCEVTVPAQNTGLGPEK	NKVPAAARAGAIAPCE	NTGLGPEKTSFFQALG	R	A	G	E	K	T	4	0	1	0	1	1	2	3	0	1	1	1	0	0	3	0	2	0	0	2	0	0	22	0	2179.09	Q5M8R8;Q5FWB6;P14869;S4R1N1;E9Q070;D3YVM5	Q5M8R8	113	134	Rplp0;Gm8730	60S acidic ribosomal protein P0	yes	no	2	0.00021752	80.412					By matching
DEDEDEEDEKEEDEEESPGQAK	DKEDDDDRDEDEDEED	EESPGQAKDEL_____	R	D	E	A	K	D	1	0	0	5	0	1	10	1	0	0	0	2	0	0	1	1	0	0	0	0	0	0	22	1	2579.96	B2MWM9;P14211;Q62041	B2MWM9	392	413	Calr	Calreticulin	yes	no	3	3.2338e-11	112.58
DLGLSESGEDVNAAILDESGKK	EDYATEVKDLGLSESG	ILDESGKKFAMEPEEF	K	D	L	K	K	F	2	0	1	3	0	0	3	3	0	1	3	2	0	0	0	3	0	0	0	1	0	0	22	1	2246.09	A0A0R4J0Z1;P08003	A0A0R4J0Z1	460	481	Pdia4	Protein disulfide-isomerase A4	yes	no	3	2.9979e-06	101.6			By matching		By MS/MS
DMHGDSEYNIMFGPDICGPGTK	FPSGLDQKDMHGDSEY	DICGPGTKKVHVIFNY	K	D	M	T	K	K	0	0	1	3	1	0	1	4	1	2	0	1	2	1	2	1	1	0	1	0	0	0	22	0	2440.01	B2MWM9;P14211;Q3UWP8	B2MWM9	121	142	Calr	Calreticulin	yes	no	3	2.1605e-07	152.51			By MS/MS		By MS/MS
DMQHLVVWTSEYDPLASNPGWK	ANPNLTWRDMQHLVVW	LASNPGWKKNGAGLMV	R	D	M	W	K	K	1	0	1	2	0	1	1	1	1	0	2	1	1	0	2	2	1	2	1	2	0	0	22	0	2572.21	Q32MU0;P63239	Q32MU0	406	427	Pcsk1	Neuroendocrine convertase 1	yes	no	3	0.00016324	74.364	By matching			By matching	By MS/MS
EAADAIDAEGASAPLMELLHSR	LCELAQDKEAADAIDA	LMELLHSRNEGTATYA	K	E	A	S	R	N	6	1	0	2	0	0	3	1	1	1	3	0	1	0	1	2	0	0	0	0	0	0	22	0	2266.09	Q02257	Q02257	616	637	Jup	Junction plakoglobin	yes	yes	3	4.0901e-07	116.04	By MS/MS
EADIDGDGQVNYEEFVQMMTAK	EEVDEMIREADIDGDG	FVQMMTAK________	R	E	A	A	K	-	2	0	1	3	0	2	3	2	0	1	0	1	2	1	0	0	1	0	1	2	0	0	22	0	2489.07	P62204;Q3UKW2;G3UX57	P62204	128	149	Calm1;Calm3	Calmodulin	yes	no	3	2.2645e-23	218.88
EDVGTVVGIDLGTTYSCVGVFK	RAEEEDKKEDVGTVVG	YSCVGVFKNGRVEIIA	K	E	D	F	K	N	0	0	0	2	1	0	1	4	0	1	1	1	0	1	0	1	3	0	1	5	0	0	22	0	2315.14	Q3U9G2;Q3TWF2;P20029;Q9DC41;Q3TKF8;Q3TI47;Q3U7T8;Q3UEM8	Q3U9G2	26	47	Hspa5	78 kDa glucose-regulated protein	yes	no	3	0.010494	47.499
EGEDAVIVCDVVSSLPPTIIWK	APTPQEFKEGEDAVIV	LPPTIIWKHKGRDVIL	K	E	G	W	K	H	1	0	0	2	1	0	2	1	0	3	1	1	0	0	2	2	1	1	0	4	0	0	22	0	2426.24	A0A0A6YWU2;E9Q589;A0A0A6YY47;E9QB01;P13595-4;P13595-3;P13595-2;P13595;A0A0A6YY91	A0A0A6YWU2	131	152	Ncam1	Neural cell adhesion molecule 1	yes	no	3	1.7829e-07	139.11	By MS/MS	By MS/MS		By MS/MS	By MS/MS
ELLVIELSDNPGVHEPGEPEFK	VGRSFEGRELLVIELS	EPGEPEFKYIGNMHGN	R	E	L	F	K	Y	0	0	1	1	0	0	5	2	1	1	3	1	0	1	3	1	0	0	0	2	0	0	22	0	2447.22	Q543R4;Q00493	Q543R4	87	108	Cpe	Carboxypeptidase E	yes	no	3	8.9574e-07	155.49	By MS/MS		By MS/MS	By matching	By MS/MS
ETVVEVPQVTWEDIGGLEDVKR	QSNPSALRETVVEVPQ	GGLEDVKRELQELVQY	R	E	T	K	R	E	0	1	0	2	0	1	4	2	0	1	1	1	0	0	1	0	2	1	0	5	0	0	22	1	2497.27	Q01853;Q8BNF8	Q01853	466	487	Vcp	Transitional endoplasmic reticulum ATPase	yes	no	3	1.2157e-11	188.19
EVCYDNLGCFSDAEPWAGTAIR	LLGAAQGKEVCYDNLG	PWAGTAIRPLKLLPWS	K	E	V	I	R	P	3	1	1	2	2	0	2	2	0	1	1	0	0	1	1	1	1	1	1	1	0	0	22	0	2530.09	Q5BKQ4	Q5BKQ4	19	40	Pnliprp1	Inactive pancreatic lipase-related protein 1	yes	yes	3	0.01963	42.863	By MS/MS	By matching		By matching	By matching
GAIVPAQEVPPPTVPMDYSWAR	VYEDLVAKGAIVPAQE	PMDYSWARELGLIRKP	K	G	A	A	R	E	3	1	0	1	0	1	1	1	0	1	0	0	1	0	5	1	1	1	1	3	0	0	22	0	2380.19	Q3TED3;Q3V117;Q91V92;Q3UEA1;Q8VDM8;Q3UVY4	Q3TED3	798	819	Acly	ATP-citrate synthase	yes	no	2;3	1.7005e-06	136.96					By MS/MS
GNDDHWIIDTDYDTFALQYSCR	GVASFLQRGNDDHWII	FALQYSCRLQNLDGTC	R	G	N	C	R	L	1	1	1	5	1	1	0	1	1	2	1	0	0	1	0	1	2	1	2	0	0	0	22	0	2704.15	H7BWY6;Q00724;Q3TF08	H7BWY6	162	183	Rbp4	Retinol-binding protein 4	yes	no	3	1.9752e-06	106.39	By MS/MS	By matching		By MS/MS	By MS/MS
GPAVGIDLGTTYSCVGVFQHGK	________________	VGVFQHGKVEIIANDQ	K	G	P	G	K	V	1	0	0	1	1	1	0	5	1	1	1	1	0	1	1	1	2	0	1	3	0	0	22	0	2262.11	Q3UBA6;Q3TZJ3;Q3TH56;Q3TEK2;P63017;Q504P4;Q3U9L2;Q3TF16;Q3TQ13;Q3UDS0;Q3TRH3;Q3TB63;D3Z5E2;D3YW43	Q3UBA6	4	25	Hspa8	Heat shock cognate 71 kDa protein	yes	no	3	1.9353e-23	220.34		By matching		By matching	By MS/MS
GPVVLAEDFLDIMGQPINPQCR	GSGKPIDRGPVVLAED	QPINPQCRIYPEEMIQ	R	G	P	C	R	I	1	1	1	2	1	2	1	2	0	2	2	0	1	1	3	0	0	0	0	2	0	0	22	0	2468.22	P62814	P62814	142	163	Atp6v1b2	V-type proton ATPase subunit B, brain isoform	yes	yes	3	7.9088e-06	97.095					By MS/MS
GVEEGQEQVIPINAGDLFVHPK	VVLGEHERGVEEGQEQ	GDLFVHPKWNSMCVSC	R	G	V	P	K	W	1	0	1	1	0	2	3	3	1	2	1	1	0	1	2	0	0	0	0	3	0	0	22	0	2375.21	Q9CQ52	Q9CQ52	90	111	Cela3b	Chymotrypsin-like elastase family member 3B	yes	yes	3	3.2758e-07	120.23	By MS/MS	By MS/MS	By MS/MS	By matching	By MS/MS
HGEVCPAGWKPGSDTIKPDVNK	QAFQFTDKHGEVCPAG	TIKPDVNKSKEYFSKQ	K	H	G	N	K	S	1	0	1	2	1	0	1	3	1	1	0	3	0	0	3	1	1	1	0	2	0	0	22	2	2391.16	P35700;Q3U9J9	P35700	169	190	Prdx1	Peroxiredoxin-1	yes	no	4	1.9976e-07	118.32					By MS/MS
IISLSQLLQEDSLNVADLSSLR	LCTFLPRKIISLSQLL	VADLSSLRAPLDIPIP	K	I	I	L	R	A	1	1	1	2	0	2	1	0	0	2	6	0	0	0	0	5	0	0	0	1	0	0	22	0	2413.31	E0CZ90;G3X9V0;Q5SVP3;P97372	E0CZ90	32	53	Psme2;PSME2b	Proteasome activator complex subunit 2	yes	no	3	2.1896e-06	105.06					By MS/MS
IYPEEMIQTGISAIDGMNSIAR	QPINPQCRIYPEEMIQ	DGMNSIARGQKIPIFS	R	I	Y	A	R	G	2	1	1	1	0	1	2	2	0	5	0	0	2	0	1	2	1	0	1	0	0	0	22	0	2408.17	P62814	P62814	164	185	Atp6v1b2	V-type proton ATPase subunit B, brain isoform	yes	yes	3	9.0996e-06	96.016					By MS/MS
KDLYANTVLSGGTTMYPGLADR	MKCDVDIRKDLYANTV	MYPGLADRMQKEITAL	R	K	D	D	R	M	2	1	1	2	0	0	0	3	0	0	3	1	1	0	1	1	3	0	2	1	0	0	22	1	2342.16	Q9QZ83	Q9QZ83	295	316	Actg1		yes	yes	2;3	1.3815e-16	203.2		By MS/MS		By MS/MS	By MS/MS
KMQEVCEQNQQLLQENSAIKQK	KCQEEELRKMQEVCEQ	ENSAIKQKLTLLQVAS	R	K	M	Q	K	L	1	0	2	0	1	6	3	0	0	1	2	3	1	0	0	1	0	0	0	1	0	0	22	2	2673.32	Q3UWH4;P33174	Q3UWH4	188	209	Kif4	Chromosome-associated kinesin KIF4	yes	no	3	0.0065696	49.188		By matching		By MS/MS
LAPITSDPTEAAAVGAVEASFK	QLFEELRRLAPITSDP	GAVEASFKCCSGAIIV	R	L	A	F	K	C	6	0	0	1	0	0	2	1	0	1	1	1	0	1	2	2	2	0	0	2	0	0	22	0	2144.1	P52480	P52480	401	422	Pkm	Pyruvate kinase PKM	yes	yes	2;3	6.1866e-07	114.75	By matching		By matching
LLAVAATAPPDAPNREEVFDER	SDTTTPIKLLAVAATA	REEVFDERAANFENHS	K	L	L	E	R	A	5	2	1	2	0	0	3	0	0	0	2	0	0	1	3	0	1	0	0	2	0	0	22	1	2380.2	Q64727	Q64727	608	629	Vcl	Vinculin	yes	yes	3	7.2753e-48	199.61		By MS/MS		By MS/MS
LLQPPAPIMPLDTNWPLLTVSK	PDIDPNAKLLQPPAPI	WPLLTVSKGFFEGSIA	K	L	L	S	K	G	1	0	1	1	0	1	0	0	0	1	5	1	1	0	5	1	2	1	0	1	0	0	22	0	2443.35	Q8R393;Q63ZW9;Q8BTF0;F8WHL2;Q8CIE6	Q8R393	150	171	Copa	Coatomer subunit alpha;Coatomer subunit alpha;Xenin;Proxenin	yes	no	3	0.00016324	74.364					By matching
LSSAPLTMAGSLAGNLQELSAR	LLGSVASRLSSAPLTM	NLQELSARYLSSSAFE	R	L	S	A	R	Y	4	1	1	0	0	1	1	2	0	0	5	0	1	0	1	4	1	0	0	0	0	0	22	0	2186.14	Q2NKI2	Q2NKI2	292	313	Vax1	Ventral anterior homeobox 1	yes	yes	3	0.024955	42.123
LTLYDIAHTPGVAADLSHIETR	KNSPLVSRLTLYDIAH	DLSHIETRANVKGYLG	R	L	T	T	R	A	3	1	0	2	0	0	1	1	2	2	3	0	0	0	1	1	3	0	1	1	0	0	22	0	2392.24	P08249;A0A0G2JF23;A0A0G2JGY4	P08249	53	74	Mdh2	Malate dehydrogenase, mitochondrial	yes	no	4	0.045978	28.675	By MS/MS
NIDNPAIADIYTEHAHQVVVAK	NGKCVILRNIDNPAIA	AHQVVVAKYAPSGFYI	R	N	I	A	K	Y	4	0	2	2	0	1	1	0	2	3	0	1	0	0	1	0	1	0	1	3	0	0	22	0	2417.23	Q3TE06;Q9DBM8;Q3TNK2;Q3TJY2;Q3U136;Q80ZI9;O88342	Q3TE06	44	65	Wdr1	WD repeat-containing protein 1	yes	no	4	1.8592e-07	118.32
TDQVIQSLIALVNDPQPEHPLR	ENWKPATKTDQVIQSL	PQPEHPLRADLAEEYS	K	T	D	L	R	A	1	1	1	2	0	3	1	0	1	2	3	0	0	0	3	1	1	0	0	2	0	0	22	0	2482.32	Q561N4;P68037	Q561N4	101	122	Ube2l3	Ubiquitin-conjugating enzyme E2 L3	yes	no	3	0.0012519	61.616					By MS/MS
TLSDLQLDYLDLYLIHWPTGFK	MVKGAFQKTLSDLQLD	IHWPTGFKPGPDYFPL	K	T	L	F	K	P	0	0	0	3	0	1	0	1	1	1	6	1	0	1	1	1	2	1	2	0	0	0	22	0	2650.37	Q3TCL2;Q5U415;Q3UDY1;P45376;D3YVJ7;Q3ULP0	Q3TCL2	96	117	Akr1b3;Akr1b1	Aldose reductase	yes	no	3	0.049458	21.223
VLLGAHSLSNPGAGSAAVQVSK	LSNYQTYRVLLGAHSL	SAAVQVSKLVVHQRWN	R	V	L	S	K	L	4	0	1	0	0	1	0	3	1	0	3	1	0	0	1	4	0	0	0	3	0	0	22	0	2062.12	P05208	P05208	85	106	Cela2a	Chymotrypsin-like elastase family member 2A	yes	yes	3	2.8024e-08	171.06		By MS/MS	By MS/MS
VVNGEEAVPHSWPWQVSLQYEK	PSHNPSSRVVNGEEAV	QVSLQYEKDGSFHHTC	R	V	V	E	K	D	1	0	1	0	0	2	3	1	1	0	1	1	0	0	2	2	0	2	1	4	0	0	22	0	2581.26	Q9CQ52	Q9CQ52	28	49	Cela3b	Chymotrypsin-like elastase family member 3B	yes	yes	3	6.077e-05	82.635	By MS/MS
VVVGEHNLSQNDGTEQYVNVQK	VDSPMTYRVVVGEHNL	EQYVNVQKIVSHPYWN	R	V	V	Q	K	I	0	0	3	1	0	3	2	2	1	0	1	1	0	0	0	1	1	0	1	5	0	0	22	0	2456.19	Q91X79	Q91X79	81	102	Cela1	Chymotrypsin-like elastase family member 1	yes	yes	2;3	3.5183e-55	275.23	By MS/MS	By MS/MS	By MS/MS
YNLGAPVAGTCYQAEWDDYVPK	KVETFRKKYNLGAPVA	EWDDYVPKLYEQLSGK	K	Y	N	P	K	L	3	0	1	2	1	1	1	2	0	0	1	1	0	0	2	0	1	1	3	2	0	0	22	0	2516.13	Q5EBQ2;Q3TGC5;P70296;D3Z1V4	Q5EBQ2	158	179	Pebp1	Phosphatidylethanolamine-binding protein 1;Hippocampal cholinergic neurostimulating peptide	yes	no	2	2.2414e-05	96.016					By MS/MS
YTPSGQSGAAASESLFISNHAY	NSLACQGKYTPSGQSG	LFISNHAY________	K	Y	T	A	Y	-	4	0	1	0	0	1	1	2	1	1	1	0	0	1	1	5	1	0	2	0	0	0	22	0	2257.03	Q5FWB7;A6ZI44;P05064;Q6NY00	Q5FWB7	343	364	Aldoa	Fructose-bisphosphate aldolase;Fructose-bisphosphate aldolase A	yes	no	2	2.5374e-06	129.85					By MS/MS
AFLEVNEEGSEAAASTSVVITGR	YVSDAFHKAFLEVNEE	TSVVITGRSLNPNRVT	K	A	F	G	R	S	4	1	1	0	0	0	4	2	0	1	1	0	0	1	0	3	2	0	0	3	0	0	23	0	2336.15	Q543J5;P32261	Q543J5	404	426	Serpinc1	Antithrombin-III	yes	no	2;3	1.2576e-08	152.06	By MS/MS	By MS/MS			By MS/MS
EATESFASDPILYRPVAVALDTK	AETIKNVREATESFAS	VAVALDTKGPEIRTGL	R	E	A	T	K	G	4	1	0	2	0	0	2	0	0	1	2	1	0	1	2	2	2	0	1	2	0	0	23	1	2492.28	P52480;P52480-2	P52480	93	115	Pkm	Pyruvate kinase PKM	no	no	3	9.5325e-18	204.21					By MS/MS
FLLYTNENPDNYQLITSDASNIR	SPAQINTRFLLYTNEN	TSDASNIRNSNFRTNR	R	F	L	I	R	N	1	1	4	2	0	1	1	0	0	2	3	0	0	1	1	2	2	0	2	0	0	0	23	0	2700.3	Q6P8U6;Q9D950	Q6P8U6	55	77	Pnlip;mCG_10680	Pancreatic triacylglycerol lipase;Triacylglycerol lipase	yes	no	3	0.0042464	55.705			By MS/MS
GTVVYGEPITASLGTDGSHYWSK	VIAQARKKGTVVYGEP	DGSHYWSKNWAKAAAF	K	G	T	S	K	N	1	0	0	1	0	0	1	4	1	1	1	1	0	0	1	3	3	1	2	2	0	0	23	0	2424.16	O08553	O08553	271	293	Dpysl2	Dihydropyrimidinase-related protein 2	yes	yes	3	8.6803e-05	72.316
GVVPLAGTNGETTTQGLDGLSER	VVGIKVDKGVVPLAGT	GLDGLSERCAQYKKDG	K	G	V	E	R	C	1	1	1	1	0	1	2	5	0	0	3	0	0	0	1	1	4	0	0	2	0	0	23	0	2271.13	Q5FWB7;A6ZI44;P05064;Q6NY00;D3YWI1;Q9CPQ9;A6ZI46;A0A0U1RPN8;D3YV98;A0A0U1RPT5	Q5FWB7	112	134	Aldoa;Aldoart1	Fructose-bisphosphate aldolase;Fructose-bisphosphate aldolase A	yes	no	2	5.6647e-24	214.14			By matching		By MS/MS
IITITGTQDQIQNAQYLLQNSVK	PLEGSEDRIITITGTQ	YLLQNSVKQYSGKFF_	R	I	I	V	K	Q	1	0	2	1	0	5	0	1	0	4	2	1	0	0	0	1	3	0	1	1	0	0	23	0	2588.38	Q3TG17;H3BLL4;B2M1R6;Q3U9Q3;Q3U6X2;Q3TUA1;Q3TJ38;Q5FWJ5;Q3TL71;P61979-3;P61979;P61979-2	Q3TG17	365	387	Hnrnpk	Heterogeneous nuclear ribonucleoprotein K	yes	no	3	2.3989e-24	213.5					By MS/MS
LCYVALDFEQEMATAASSSSLEK	IVREIKEKLCYVALDF	ASSSSLEKSYELPDGQ	K	L	C	E	K	S	4	0	0	1	1	1	3	0	0	0	3	1	1	1	0	4	1	0	1	1	0	0	23	0	2549.17	Q3UAF7;Q3UAF6;Q3U5R4;B2RRX1;P60710;Q3UAA9;Q3UA89;Q3U939;Q3U804;Q3UGS0;Q61276;Q3UCF8;E9Q1F2;E9Q5F4;O89054;Q6IWE2;Q4KL81;P63260;Q3TSB7;Q3UBP6;Q3UBQ4;Q9QZ83	Q3UAF7	216	238	Actb;Actg1	Actin, cytoplasmic 1;Actin, cytoplasmic 1, N-terminally processed;Actin, cytoplasmic 2;Actin, cytoplasmic 2, N-terminally processed	no	no	2;3	2.673e-09	175.86	By MS/MS	By MS/MS		By MS/MS	By MS/MS
LVPLLLEDGGDAPAALEAALEEK	VLQKHLRKLVPLLLED	LEAALEEKSALEQMRK	K	L	V	E	K	S	5	0	0	2	0	0	4	2	0	0	6	1	0	0	2	0	0	0	0	1	0	0	23	0	2333.24	Q9JHU4	Q9JHU4	35	57	Dync1h1	Cytoplasmic dynein 1 heavy chain 1	yes	yes	3	0.001767	60.939
NGVGLEFNHLFGYGVLDAGAMVK	DEVHQWRRNGVGLEFN	LDAGAMVKMAKDWKTV	R	N	G	V	K	M	2	0	2	1	0	0	1	5	1	0	3	1	1	2	0	0	0	0	1	3	0	0	23	0	2407.2	Q3UZV3;Q547J8;Q3TYM6;Q3TT48;P21661	Q3UZV3	413	435	Pcsk2	Neuroendocrine convertase 2	yes	no	3	2.3537e-07	106.11					By MS/MS
SINPDEAVAYGAAVQAAILSGDK	FNGKELNKSINPDEAV	AAILSGDKSENVQDLL	K	S	I	D	K	S	6	0	1	2	0	1	1	2	0	2	1	1	0	0	1	2	0	0	1	2	0	0	23	0	2259.14	Q3UBA6;Q3TZJ3;Q3TH56;Q3TEK2;P63017;Q504P4;Q3U9L2;Q3TF16;Q3TQ13;Q3UDS0;Q3ULM1;Q3TRH3;Q3TB63;Q3KQJ4;Q3TH04;Q3UXU1	Q3UBA6	362	384	Hspa8	Heat shock cognate 71 kDa protein	yes	no	2;3	6.7847e-08	158.05					By MS/MS
TDLNPDNLQGGDDLDPNYVLSSR	YQPSDEHKTDLNPDNL	PNYVLSSRVRTGRSIR	K	T	D	S	R	V	0	1	3	5	0	1	0	2	0	0	4	0	0	0	2	2	1	0	1	1	0	0	23	0	2517.16	Q04447	Q04447	108	130	Ckb	Creatine kinase B-type	yes	yes	2	3.7613e-08	156.23
TLEGPVPLEVIVIDQNDNRPIFR	ETTDASGKTLEGPVPL	NDNRPIFREGPYIGHV	K	T	L	F	R	E	0	2	2	2	0	1	2	1	0	3	2	0	0	1	3	0	1	0	0	3	0	0	23	1	2633.42	Q8CE18;Q8VDK4;Q9WTR5;Q8BS79	Q8CE18	224	246	Cdh13	Cadherin-13	yes	no	3	6.0307e-08	125.04		By MS/MS		By MS/MS	By MS/MS
TLGISPFHEFADVVFTANDSGHR	LDTKSYWKTLGISPFH	TANDSGHRHYTIAALL	K	T	L	H	R	H	2	1	1	2	0	0	1	2	2	1	1	0	0	3	1	2	2	0	0	2	0	0	23	0	2516.21	Q5M9K1;P07309;Q9D6A4	Q5M9K1	101	123	Ttr	Transthyretin	yes	no	4	1.7965e-07	104.35	By MS/MS			By MS/MS	By MS/MS
TTDVVVAGEFDQGSDEENVQVLK	TAAHCGVKTTDVVVAG	EENVQVLKIAQVFKNP	K	T	T	L	K	I	1	0	1	3	0	2	3	2	0	0	1	1	0	1	0	1	2	0	0	5	0	0	23	0	2478.18	Q9CR35	Q9CR35	80	102	Ctrb1	Chymotrypsinogen B;Chymotrypsin B chain A;Chymotrypsin B chain B;Chymotrypsin B chain C	yes	yes	2;3	1.185e-32	234.04	By MS/MS		By MS/MS
TVLSANADHMAQIEGLMDDVDFK	LREANRLKTVLSANAD	LMDDVDFKAKVTRVEF	K	T	V	F	K	A	3	0	1	4	0	1	1	1	1	1	2	1	2	1	0	1	1	0	0	2	0	0	23	0	2519.17	Q9JKR6;Q8VCI2	Q9JKR6	318	340	Hyou1	Hypoxia up-regulated protein 1	yes	no	3	0.0069554	49.66					By MS/MS
WFSQGSRPFIFQEVIDLGGEAIK	KLHNLNTKWFSQGSRP	DLGGEAIKGSEYFGNG	K	W	F	I	K	G	1	1	0	1	0	2	2	3	0	3	1	1	0	3	1	2	0	1	0	1	0	0	23	1	2623.34	Q8C5B4;P00688	P00688	233	255	Amy2	Alpha-amylase;Pancreatic alpha-amylase	no	no	3	1.0673e-18	212.05		By MS/MS		By MS/MS	By matching
YHVPVVVVPEGSTSDTQEQAILR	AAALSQNRYHVPVVVV	TQEQAILRLQVSNVLS	R	Y	H	L	R	L	1	1	0	1	0	2	2	1	1	1	1	0	0	0	2	2	2	0	1	5	0	0	23	0	2523.3	Q61833;A2ACG7;Q3U505;Q9DBG6	Q61833	257	279	Rpn2	Dolichyl-diphosphooligosaccharide--protein glycosyltransferase subunit 2	yes	no	3	5.661e-05	77.221			By matching
YVSHFETDGPHVLLYFDSVPTTR	KLTSLSDRYVSHFETD	FDSVPTTRECVGFGAS	R	Y	V	T	R	E	0	1	0	2	0	0	1	1	2	0	2	0	0	2	2	2	3	0	2	3	0	0	23	0	2679.3	B9EIU2;V9GZG9;V9GZQ6;V9GZJ5	B9EIU2	1502	1524	C4a;Slp		no	no	3	0.0018798	60.325		By MS/MS			By MS/MS
AYHEQLSVAEITNACFEPANQMVK	APVISAEKAYHEQLSV	EPANQMVKCDPRHGKY	K	A	Y	V	K	C	4	0	2	0	1	2	3	0	1	1	1	1	1	1	1	1	1	0	1	2	0	0	24	0	2749.28	P05213;Q99KA2;P68369;Q5FW91;P05214;Q9D9Y2;A0A0A0MQA5;P68368	P05213	281	304	Tuba1b;Tuba1a;Tuba3a;Tuba4a	Tubulin alpha-1B chain;Tubulin alpha-1A chain;Tubulin alpha-3 chain;Tubulin alpha-4A chain	no	no	3	3.7781e-09	152.48	By matching
DLAILLGMLDPVEKDDNNMPVTAR	PIIDDKGRDLAILLGM	NNMPVTARVVFIFGPD	R	D	L	A	R	V	2	1	2	4	0	0	1	1	0	1	4	1	2	0	2	0	1	0	0	2	0	0	24	1	2639.33	Q53ZU7;O08709	Q53ZU7	109	132	Prdx6	Peroxiredoxin-6	yes	no	3	1.2372e-08	110.26					By MS/MS
EGDALELTCEAIGKPQPVMVTWVR	YPLQGLTREGDALELT	PVMVTWVRVDDEMPQH	R	E	G	V	R	V	2	1	0	1	1	1	3	2	0	1	2	1	1	0	2	0	2	1	0	3	0	0	24	1	2698.35	Q9QYL3;Q9QYL4	Q9QYL3	112	135	Cadm1		yes	no	3	1.0597e-09	164.27		By matching		By MS/MS
FIQDSIFGLCPHMTEDNKDLIQGK	MTSGKIKKFIQDSIFG	NKDLIQGKDLLTAYYD	K	F	I	G	K	D	0	0	1	3	1	2	1	2	1	3	2	2	1	2	1	1	1	0	0	0	0	0	24	1	2805.35	P27773	P27773	235	258	Pdia3	Protein disulfide-isomerase A3	yes	yes	3	7.5946e-05	70.316					By MS/MS
FQDDPDGLHQLDGTPLTAEDIVHK	TKSGLDHKFQDDPDGL	TAEDIVHKIATRIYEE	K	F	Q	H	K	I	1	0	0	5	0	2	1	2	2	1	3	1	0	1	2	0	2	0	0	1	0	0	24	0	2660.27	P47867;P47867-2	P47867	134	157	Scg3	Secretogranin-3	yes	no	3;4	1.419e-14	193.39	By MS/MS	By matching	By MS/MS	By MS/MS	By MS/MS
GSLQPGTSHVNEFDSDVDVGDLQK	SKQYEVFKGSLQPGTS	VDVGDLQKVKFIWYNN	K	G	S	Q	K	V	0	0	1	4	0	2	1	3	1	0	2	1	0	1	1	3	1	0	0	3	0	0	24	0	2543.18	Q6P8U6	Q6P8U6	391	414	Pnlip	Pancreatic triacylglycerol lipase	yes	yes	3	6.7438e-09	113.31	By MS/MS		By MS/MS
IDDPTDSKPEDWDKPEHIPDPDAK	EDWDERAKIDDPTDSK	HIPDPDAKKPEDWDEE	K	I	D	A	K	K	1	0	0	7	0	0	2	0	1	2	0	3	0	0	5	1	1	1	0	0	0	0	24	2	2759.26	B2MWM9;P14211;Q3UWP8	B2MWM9	225	248	Calr	Calreticulin	yes	no	4;5	1.4678e-07	100.39	By matching		By MS/MS
IEALQADNDFTNERLTALQENQAK	KEQELQAKIEALQADN	ALQENQAKAKESDLSD	K	I	E	A	K	A	4	1	3	2	0	3	3	0	0	1	3	1	0	1	0	0	2	0	0	0	0	0	24	1	2731.34	F6UV57	F6UV57	26	49	Slmap		yes	yes	2	0.0055138	50.752				By MS/MS
IPVTDEEQTNVPYIYAIGDILEGK	KINEKTGKIPVTDEEQ	IGDILEGKLELTPVAI	K	I	P	G	K	L	1	0	1	2	0	1	3	2	0	4	1	1	0	0	2	0	2	0	2	2	0	0	24	0	2676.35	Q91Y95;Q9JMH6-2;Q9JMH6	Q91Y95	136	159	Txnrd1	Thioredoxin reductase 1, cytoplasmic	yes	no	3	0.0011558	62.781
KPEDWDEEMDGEWEPPVIQNPEYK	HIPDPDAKKPEDWDEE	VIQNPEYKGEWKPRQI	K	K	P	Y	K	G	0	0	1	3	0	1	6	1	0	1	0	2	1	0	4	0	0	2	1	1	0	0	24	1	2959.29	B2MWM9;P14211;Q3UWP8	B2MWM9	249	272	Calr	Calreticulin	yes	no	3	3.9745e-09	153.88	By matching		By MS/MS		By MS/MS
LICCDILDVLDKHLIPAANTGESK	QMVETELKLICCDILD	AANTGESKVFYYKMKG	K	L	I	S	K	V	2	0	1	3	2	0	1	1	1	3	4	2	0	0	1	1	1	0	0	1	0	0	24	1	2694.37	Q5SS40;P62259;F6WA09	Q5SS40	95	118	Ywhae	14-3-3 protein epsilon	yes	no	4	1.2734e-08	109.23		By MS/MS		By MS/MS
NLEVLNFFNNQIEELPTQISSLQK	PPNVAELKNLEVLNFF	TQISSLQKLKHLNLGW	K	N	L	Q	K	L	0	0	4	0	0	3	3	0	0	2	4	1	0	2	1	2	1	0	0	1	0	0	24	0	2817.45	B1AYQ0;Q3TFN7;A2AUR7;Q9D031;Q01730	B1AYQ0	64	87	Rsu1	Ras suppressor protein 1	yes	no	3	1.9394e-05	81.65		By MS/MS		By MS/MS
QTQTFTTYSDNQPGVLIQVYEGER	RNTTIPTKQTQTFTTY	IQVYEGERAMTKDNNL	K	Q	T	E	R	A	0	1	1	1	0	4	2	2	0	1	1	0	0	1	1	1	4	0	2	2	0	0	24	0	2773.32	Q3UBA6;Q3TZJ3;Q3TH56;Q3TEK2;P63017;Q504P4;Q3U9L2;Q3TF16;Q3TQ13;Q3UDS0;Q3ULM1;Q3TRH3;Q3TB63;Q3KQJ4;Q3TH04;Q3UXU1;Q3UBR0;Q3TU85;Q3TAI8;A1E2B8;Q61696;P17879;Q61698	Q3UBA6	424	447	Hspa8;Hspa1b;Hspa1a	Heat shock cognate 71 kDa protein;Heat shock 70 kDa protein 1A;Heat shock 70 kDa protein 1B	yes	no	3	0.0084371	49.871
TFSHELSDFGLESTTGEVPVVAIR	NFAVASRKTFSHELSD	EVPVVAIRTAKGEKFV	K	T	F	I	R	T	1	1	0	1	0	0	3	2	1	1	2	0	0	2	1	3	3	0	0	3	0	0	24	0	2590.29	P27773	P27773	306	329	Pdia3	Protein disulfide-isomerase A3	yes	yes	3	6.5884e-11	175.52	By MS/MS
VETGVLKPGMVVTFAPVNVTTEVK	IGTVPVGRVETGVLKP	VNVTTEVKSVEMHHEA	R	V	E	V	K	S	1	0	1	0	0	0	2	2	0	0	1	2	1	1	2	0	4	0	0	7	0	0	24	1	2514.38	Q58E64;Q3UA81;P10126;Q3TII3	Q58E64	267	290	Eef1a1	Elongation factor 1-alpha;Elongation factor 1-alpha 1	yes	no	2;3	8.6605e-34	232.44	By MS/MS	By MS/MS	By MS/MS	By MS/MS	By MS/MS
VIHDNFGIVEGLMTTVHAITATQK	NCLAPLAKVIHDNFGI	HAITATQKTVDGPSGK	K	V	I	Q	K	T	2	0	1	1	0	1	1	2	2	3	1	1	1	1	0	0	4	0	0	3	0	0	24	0	2594.35	S4R257;D2KHZ9;A0A0A0MQF6;P16858;S4R1W1;D3YYI5	S4R257	118	141	Gapdh;GAPDH;Gm3839;Gm7293	Glyceraldehyde-3-phosphate dehydrogenase	yes	no	3;4	3.9739e-17	147.26		By MS/MS		By MS/MS	By MS/MS
AADISQWAGPLCLQEVDEPPQHALR	________________	EPPQHALRVDYAGVTV	M	A	A	L	R	V	4	1	0	2	1	3	2	1	1	1	3	0	0	0	3	1	0	1	0	1	0	0	25	0	2800.36	Q5EBQ2;Q3TGC5;P70296;D3Z1V4;D6RHS6	Q5EBQ2	2	26	Pebp1	Phosphatidylethanolamine-binding protein 1;Hippocampal cholinergic neurostimulating peptide	yes	no	2;3	1.3884e-14	190.19					By MS/MS
AEGSDVANAVLDGADCIMLSGETAK	IKKPRPTRAEGSDVAN	MLSGETAKGDYPLEAV	R	A	E	A	K	G	5	0	1	3	1	0	2	3	0	1	2	1	1	0	0	2	1	0	0	2	0	0	25	0	2493.14	P52480;P52480-2	P52480	343	367	Pkm	Pyruvate kinase PKM	no	no	2;3	2.3021e-124	264.52					By MS/MS
AGWNAYIDSLMADGTCQDAAIVGYK	________________	DAAIVGYKDSPSVWAA	M	A	G	Y	K	D	5	0	1	3	1	1	0	3	0	2	1	1	1	0	0	1	1	1	2	1	0	0	25	0	2689.22	Q5SX49;Q8CEH8;Q5SX50;P62962;Q3U7V7;J3QMC2	Q5SX49	2	26	Pfn1	Profilin;Profilin-1	yes	no	3	9.7777e-07	85.805					By MS/MS
EKLCYVALDFEQEMATAASSSSLEK	REIVREIKEKLCYVAL	ASSSSLEKSYELPDGQ	K	E	K	E	K	S	4	0	0	1	1	1	4	0	0	0	3	2	1	1	0	4	1	0	1	1	0	0	25	1	2806.3	Q3UAF7;Q3UAF6;Q3U5R4;B2RRX1;P60710;Q3UAA9;Q3UA89;Q3U939;Q3U804;Q3UGS0;Q61276;Q3UCF8;E9Q1F2;E9Q5F4;O89054;Q6IWE2;Q4KL81;P63260;Q3TSB7;Q3UBP6;Q3UBQ4;Q9QZ83	Q3UAF7	214	238	Actb;Actg1	Actin, cytoplasmic 1;Actin, cytoplasmic 1, N-terminally processed;Actin, cytoplasmic 2;Actin, cytoplasmic 2, N-terminally processed	no	no	3	6.7357e-09	146.39		By matching		By MS/MS
GVAALTSDPAVQAIVLDTASDVLDK	RSLAQAARGVAALTSD	TASDVLDKASSLIEEA	R	G	V	D	K	A	5	0	0	4	0	1	0	1	0	1	3	1	0	0	1	2	2	0	0	4	0	0	25	0	2468.3	Q3UHS6;Q80TM2;P26039	Q3UHS6	1137	1161	Tln1	Talin-1	yes	no	3	3.0632e-09	157.3				By MS/MS	By MS/MS
LLNLGLITESQAHTLEDEVAEALQK	VFDKIVSKLLNLGLIT	EVAEALQKLISKEANN	K	L	L	Q	K	L	3	0	1	1	0	2	4	1	1	1	6	1	0	0	0	1	2	0	0	1	0	0	25	0	2734.44	P47867;P47867-2	P47867	178	202	Scg3	Secretogranin-3	yes	no	3;4	1.053e-19	204.65	By MS/MS			By MS/MS	By MS/MS
LTLVCSTAPGPLELDLTGDLESFKK	VPNVIVTRLTLVCSTA	GDLESFKKQSFVLKEG	R	L	T	K	K	Q	1	0	0	2	1	0	2	2	0	0	6	2	0	1	2	2	3	0	0	1	0	0	25	1	2703.4	Q99PT1	Q99PT1	75	99	Arhgdia	Rho GDP-dissociation inhibitor 1	yes	yes	3	2.1427e-14	186.62		By matching		By MS/MS
LTTPTYGDLNHLVSATMSGVTTCLR	DICFRTLKLTTPTYGD	SGVTTCLRFPGQLNAD	K	L	T	L	R	F	1	1	1	1	1	0	0	2	1	0	4	0	1	0	1	2	6	0	1	2	0	0	25	0	2707.33	B2RSN3;Q9CWF2;Q7TMM9;Q99J49;P68372;Q9D6F9;Q9CVR0;Q9DCR1;P99024	P68372	217	241	Tubb2b;Tubb2a;Tubb4b;Tubb4a;Tubb5	Tubulin beta-2B chain;Tubulin beta-2A chain;Tubulin beta-4B chain;Tubulin beta-4A chain;Tubulin beta-5 chain	no	no	3	6.1617e-09	135.62		By matching			By matching
LVQDVANNTNEEAGDGTTTATVLAR	KYKNIGAKLVQDVANN	TTATVLARSIAKEGFE	K	L	V	A	R	S	4	1	3	2	0	1	2	2	0	0	2	0	0	0	0	0	5	0	0	3	0	0	25	0	2559.24	P63038;D3Z7J9;D3Z2F2	P63038	97	121	Hspd1	60 kDa heat shock protein, mitochondrial	yes	no	3	3.5589e-09	147.26
MVLMNELNKQANGLIEELEGITNER	ENQIKMAKMVLMNELN	LEGITNERKRKLEQQL	K	M	V	E	R	K	1	1	4	0	0	1	5	2	0	2	4	1	2	0	0	0	1	0	0	1	0	0	25	1	2857.43	Q3UH62;E9PZP2;B2RQQ4;Q5SEK5;E9QLR8;Q924W6-2;Q924W6	Q3UH62	156	180	Trim66	Tripartite motif-containing protein 66	yes	no	3	0.008571	49.497
QFLLAAEAIDDIPFGITSNSGVFSK	DVESDSAKQFLLAAEA	SNSGVFSKYQLDKDGV	K	Q	F	S	K	Y	3	0	1	2	0	1	1	2	0	3	2	1	0	3	1	3	1	0	0	1	0	0	25	0	2639.35	Q3UDR2;Q3URP6;Q3U738;Q3TWE3;Q3TIM0;Q3THC3;Q3TF72;P09103;Q3TGS0;Q3UJA8;Q3UA23;Q3TT76	Q3UDR2	173	197	P4hb	Protein disulfide-isomerase	yes	no	3	5.4308e-10	120.63		By MS/MS		By matching	By MS/MS
[truncated: 81 more rows]
[truncated: 36 more columns]
