# Supplementary material for: Bottom-up proteomics analysis of the secretome of murine islets of Langerhans in elevated glucose levels
Source: Royal Society of Chemistry journal article supplement (doi:10.1039/c6an02268e), 2016-12-05
Supplement: c6an02268e2.xlsx [file c6an02268e2.xlsx]

## Sheet: All Sample Protein ID
Protein IDs	Majority protein IDs	Peptide counts (all)	Peptide counts (razor+unique)	Peptide counts (unique)	Protein names	Gene names	Fasta headers	Number of proteins	Peptides	Razor + unique peptides	Unique peptides	Peptides Normal-1	Peptides Normal-2	Peptides Normal-3	Peptides 1EG-1	Peptides 1EG-2	Peptides 1EG-3	Peptides 2EG-1	Peptides 2EG-2	Peptides 2EG-3	Razor + unique peptides Normal-1	Razor + unique peptides Normal-2	Razor + unique peptides Normal-3	Razor + unique peptides 1EG-1	Razor + unique peptides 1EG-2	Razor + unique peptides 1EG-3	Razor + unique peptides 2EG-1	Razor + unique peptides 2EG-2	Razor + unique peptides 2EG-3	Unique peptides Normal-1	Unique peptides Normal-2	Unique peptides Normal-3	Unique peptides 1EG-1	Unique peptides 1EG-2	Unique peptides 1EG-3	Unique peptides 2EG-1	Unique peptides 2EG-2	Unique peptides 2EG-3	Sequence coverage [%]	Unique + razor sequence coverage [%]	Unique sequence coverage [%]	Mol. weight [kDa]	Sequence length	Sequence lengths	Q-value	Score	Identification type Normal-1	Identification type Normal-2	Identification type Normal-3
Q8K016;G3X977;Q61703	Q8K016;G3X977;Q61703	15;15;15	1;1;1	1;1;1	Inter-alpha-trypsin inhibitor heavy chain H2	Itih2	;;	3	15	1	1	10	10	10	9	14	9	14	12	9	1	0	0	0	0	0	0	0	0	1	0	0	0	0	0	0	0	0	13.5	3.5	3.5	105.94	946	946;950;946	0	2.5991	By MS/MS	By matching	By matching
Q3TWK8;B2CQD6;Q08879;Q08879-2;Q3TW70	Q3TWK8;B2CQD6;Q08879;Q08879-2	7;7;7;4;2	1;1;1;1;0	1;1;1;1;0	Fibulin-1	Fbln1	;;;	5	7	1	1	3	5	3	4	6	4	6	5	4	0	1	0	0	0	0	0	0	0	0	1	0	0	0	0	0	0	0	11.1	2.4	2.4	78.06	705	705;705;705;685;228	0	48.605	By matching	By MS/MS	By matching
Q792Y6;P07146	Q792Y6;P07146	5;5	3;3	3;3	Anionic trypsin-2	Prss2	;	2	5	3	3	3	5	3	4	2	2	1	1	1	1	3	1	3	1	0	1	0	0	1	3	1	3	1	0	1	0	0	35.8	28.5	28.5	26.203	246	246;246	0	14.287	By MS/MS	By MS/MS	By matching
Q6IMF0;E9Q1Y9;B2RTB6;P97861;Q61726;Q9ERE2	Q6IMF0;E9Q1Y9;B2RTB6;P97861;Q61726;Q9ERE2	15;13;13;12;12;11;11	2;2;2;1;1;2;1	1;1;1;0;0;1;0	Keratin, type II cuticular Hb3;Keratin, type II cuticular Hb6;Keratin, type II cuticular Hb1	Krt83;5430421N21Rik;Krt86;Krt81	;;;;;;	7	15	2	1	3	8	4	2	10	11	1	2	2	0	0	0	0	0	2	0	1	1	0	0	0	0	0	1	0	1	1	28.9	3.6	1.8	54.628	495	495;479;479;486;486;495;481	0	5.4392	By matching	By matching	By matching
Q8BIS2;Q148Q7;E9Q1Z0	Q8BIS2;Q148Q7;E9Q1Z0	10;10;10;5	1;1;1;1	0;0;0;0		4732456N10Rik	;;;	4	10	1	0	6	6	7	6	3	9	3	5	5	0	0	0	0	0	1	0	0	0	0	0	0	0	0	0	0	0	0	12.8	2	0	58.266	538	538;538;538;511	0	2.1728	By matching	By matching	By matching
Q54AH9;Q549D9;A8DV59;A8DV41;P02089;Q9QUN8;D0U293	Q54AH9;Q549D9;A8DV59;A8DV41;P02089;Q9QUN8;D0U293	7;7;7;7;7;6;6	3;3;3;3;3;2;2	3;3;3;3;3;2;2	Hemoglobin subunit beta-2	Hbb-b2;Hbbt2	;;;;;;	7	7	3	3	5	2	2	2	2	7	2	3	2	1	0	0	0	0	3	0	0	0	1	0	0	0	0	3	0	0	0	58.9	28.8	28.8	15.747	146	146;147;147;147;147;146;147	0	2.4712	By MS/MS	By matching	By matching
Q9JJ20;O70456	Q9JJ20;O70456	3;3	1;1	1;1	14-3-3 protein sigma	Sfn	;	2	3	1	1	3	2	2	2	1	3	1	1	1	1	1	1	0	0	1	0	0	0	1	1	1	0	0	1	0	0	0	10.5	3.2	3.2	27.833	248	248;248	0.008	1.1659	By MS/MS	By matching	By MS/MS
Q9CY10;Q91VB8;Q8BPF4;A8DUV3;P01942;Q9QWJ3;Q9CY06;Q9CWS5;Q61287;A8DUV1;Q61649;Q78PA4;A7M7S6;P06467	Q9CY10;Q91VB8;Q8BPF4;A8DUV3;P01942;Q9QWJ3;Q9CY06;Q9CWS5;Q61287;A8DUV1;Q61649	6;6;6;6;6;5;5;5;5;5;3;1;1;1	4;4;4;4;4;3;3;3;3;3;3;0;0;0	4;4;4;4;4;3;3;3;3;3;3;0;0;0	Hemoglobin subunit alpha	haemaglobin alpha 2;Hbat1;Hba	;;;;;;;;;;	14	6	4	4	3	1	2	2	3	5	2	2	2	2	0	1	1	1	4	0	0	1	2	0	1	1	1	4	0	0	1	43	36.6	36.6	15.202	142	142;142;142;142;142;122;142;142;142;142;58;142;156;142	0	10.476	By MS/MS	By matching	By MS/MS
Q3UEK0;Q9Z0K8	Q3UEK0;Q9Z0K8	1;1	1;1	1;1	Pantetheinase	Vnn1	;	2	1	1	1	1	1	1	1	1	1	1	1	1	1	1	1	1	1	1	1	1	1	1	1	1	1	1	1	1	1	1	4	4	4	36.775	328	328;512	0	26.693	By MS/MS	By MS/MS	By MS/MS
Q80U51;F6SLR4;Q9ER58;Q6PAN0	Q80U51;F6SLR4;Q9ER58;Q6PAN0	4;4;4;2	4;4;4;2	4;4;4;2	Testican-2	Spock2	;;;	4	4	4	4	2	0	0	0	1	4	1	1	1	2	0	0	0	1	4	1	1	1	2	0	0	0	1	4	1	1	1	15.3	15.3	15.3	42.415	380	380;423;423;321	0	9.1837	By MS/MS
Q9R0T7;Q9QUK9;Q3V2E0;G3UXD0;Q7M754;Q792Y9;Q9Z1R9	Q9R0T7;Q9QUK9;Q3V2E0;G3UXD0;Q7M754	8;6;6;4;4;2;2	8;6;6;4;4;2;2	3;3;3;2;1;0;0		Try4;Try5;Gm5409	;;;;	7	8	8	3	5	6	5	5	4	6	1	2	4	5	6	5	5	4	6	1	2	4	1	2	1	2	1	2	1	1	2	57.3	57.3	26.4	26.274	246	246;246;255;135;246;245;246	0	87.283	By MS/MS	By MS/MS	By MS/MS
Q5BKQ4	Q5BKQ4	9	9	9	Inactive pancreatic lipase-related protein 1	Pnliprp1		1	9	9	9	5	6	3	5	2	7	1	1	3	5	6	3	5	2	7	1	1	3	5	6	3	5	2	7	1	1	3	25.8	25.8	25.8	52.695	473	473	0	19.749	By MS/MS	By MS/MS	By MS/MS
Q6P8U6;Q9D950;Q4VBW7;P17892	Q6P8U6	14;6;1;1	14;6;1;1	14;6;1;1	Pancreatic triacylglycerol lipase	Pnlip		4	14	14	14	8	4	6	7	4	11	2	2	1	8	4	6	7	4	11	2	2	1	8	4	6	7	4	11	2	2	1	39.8	39.8	39.8	51.427	465	465;163;482;482	0	39.138	By MS/MS	By MS/MS	By MS/MS
A6BLY7	A6BLY7	3	1	1	Keratin, type I cytoskeletal 28	Krt28		1	3	1	1	3	2	2	2	2	3	2	2	2	1	1	1	1	1	1	1	1	1	1	1	1	1	1	1	1	1	1	5	1.9	1.9	50.346	462	462	0.0045662	1.8039	By MS/MS	By MS/MS	By MS/MS
P97298	P97298	5	1	1	Pigment epithelium-derived factor	Serpinf1		1	5	1	1	2	4	3	4	5	3	5	5	4	0	0	0	0	1	0	1	1	0	0	0	0	0	1	0	1	1	0	15.3	4.3	4.3	46.233	417	417	0	8.0734	By matching	By matching	By matching
E9Q557;E9PZW0;Q9CV95;Q8BP77	E9Q557;E9PZW0	47;32;8;5	47;32;8;5	47;32;8;5	Desmoplakin	Dsp	;	4	47	47	47	30	15	7	14	2	44	2	5	2	30	15	7	14	2	44	2	5	2	30	15	7	14	2	44	2	5	2	16.3	16.3	16.3	332.91	2883	2883;2284;474;482	0	99.321	By MS/MS	By MS/MS	By MS/MS
Q4FZC9-2;Q4FZC9	Q4FZC9-2;Q4FZC9	1;1	1;1	1;1	Nesprin-3	Syne3	;	2	1	1	1	0	0	0	0	1	0	1	1	1	0	0	0	0	1	0	1	1	1	0	0	0	0	1	0	1	1	1	1.9	1.9	1.9	102.2	888	888;975	1	-2
Q4FJS7;Q3TBR2;Q3TDB9;Q3U3V1;O88947	Q4FJS7;Q3TBR2;Q3TDB9;Q3U3V1;O88947	2;2;2;2;2	2;2;2;2;2	2;2;2;2;2	Coagulation factor X;Factor X light chain;Factor X heavy chain;Activated factor Xa heavy chain	F10	;;;;	5	2	2	2	0	0	2	1	1	0	1	1	2	0	0	2	1	1	0	1	1	2	0	0	2	1	1	0	1	1	2	3.7	3.7	3.7	54.003	481	481;481;492;493;481	0	2.2891			By MS/MS
D3Z0P3;H3BJV3;Q3UEP8;E9QK54;E9QLL8;Q8CIE0	D3Z0P3;H3BJV3;Q3UEP8;E9QK54;E9QLL8;Q8CIE0	1;1;1;1;1;1	1;1;1;1;1;1	1;1;1;1;1;1	Serpin A11	Serpina11	;;;;;	6	1	1	1	0	0	0	0	1	0	1	1	1	0	0	0	0	1	0	1	1	1	0	0	0	0	1	0	1	1	1	6.3	6.3	6.3	26.356	237	237;258;425;425;427;424	0	12.57
Q8BNU3;Q543D2;P50608;Q7TPZ1	Q8BNU3;Q543D2;P50608;Q7TPZ1	2;2;2;1	2;2;2;1	2;2;2;1	Fibromodulin	Fmod	;;;	4	2	2	2	0	0	0	0	2	0	2	1	1	0	0	0	0	2	0	2	1	1	0	0	0	0	2	0	2	1	1	5.1	5.1	5.1	43.053	376	376;376;376;404	0	36.141
Q8BL86	Q8BL86	1	1	1	Metallo-beta-lactamase domain-containing protein 2	Mblac2		1	1	1	1	0	0	0	0	1	0	1	1	1	0	0	0	0	1	0	1	1	1	0	0	0	0	1	0	1	1	1	5.4	5.4	5.4	31.205	279	279	0.0096525	1.0434
Q61833;A2ACG7;Q3U505;Q9DBG6	Q61833;A2ACG7;Q3U505;Q9DBG6	2;2;2;2	2;2;2;2	2;2;2;2	Dolichyl-diphosphooligosaccharide--protein glycosyltransferase subunit 2	Rpn2	;;;	4	2	2	2	1	0	1	0	1	1	0	1	1	1	0	1	0	1	1	0	1	1	1	0	1	0	1	1	0	1	1	6.3	6.3	6.3	66.301	607	607;615;659;631	0	2.8673	By MS/MS		By matching
Q3UDA7;Q8BSZ3;Q9DAY9;Q5BL09;Q5SQB0;E9Q5T3;Q5SQB5;Q5U438;Q5SQB7;Q3U536;Q61937	Q3UDA7;Q8BSZ3;Q9DAY9;Q5BL09;Q5SQB0;E9Q5T3;Q5SQB5;Q5U438;Q5SQB7;Q3U536;Q61937	1;1;1;1;1;1;1;1;1;1;1	1;1;1;1;1;1;1;1;1;1;1	1;1;1;1;1;1;1;1;1;1;1	Nucleophosmin	Npm1;Gm5611	;;;;;;;;;;	11	1	1	1	1	0	0	0	0	1	0	1	1	1	0	0	0	0	1	0	1	1	1	0	0	0	0	1	0	1	1	9.5	9.5	9.5	22.124	200	200;226;257;257;264;272;285;292;292;292;292	0	2.1776	By MS/MS
Q8C2E1;Q7TMX2;Q76MZ3	Q8C2E1;Q7TMX2;Q76MZ3	1;1;1	1;1;1	1;1;1	Serine/threonine-protein phosphatase 2A 65 kDa regulatory subunit A alpha isoform	Ppp2r1a	;;	3	1	1	1	1	0	0	0	0	1	0	1	1	1	0	0	0	0	1	0	1	1	1	0	0	0	0	1	0	1	1	3.4	3.4	3.4	65.209	589	589;589;589	0.0045558	1.8018	By MS/MS
Q61782	Q61782	5;5	1;1	1;1			;	2	5	1	1	3	4	3	4	1	5	0	2	1	0	0	0	0	0	1	0	0	0	0	0	0	0	0	1	0	0	0	58.1	10.8	10.8	10.662	93	93;93	1	-2	By matching	By matching	By matching
Q546G4;P07724;K7R066	Q546G4;P07724;K7R066	4;4;2	2;2;1	2;2;1	Serum albumin	Alb	;;	3	4	2	2	2	1	3	2	2	2	2	2	2	1	0	2	1	1	0	1	1	1	1	0	2	1	1	0	1	1	1	7.4	3.6	3.6	68.692	608	608;608;171	0	2.4905	By MS/MS	By matching	By matching
D3Z6E4;Q922A0;Q545V3;Q3UJ20;P17183;D3YVD3;D3Z2S4;A0A0N4SUX5;A0A0N4SUI6;B1ARR6;A0A0N4SUW8;Q5SX61;Q5SX60;Q5SX59;Q4FK59;P21550	D3Z6E4;Q922A0;Q545V3;Q3UJ20;P17183;D3YVD3;D3Z2S4;A0A0N4SUX5;A0A0N4SUI6;B1ARR6	4;4;4;4;4;3;3;3;2;2;1;1;1;1;1;1	2;2;2;2;2;1;1;1;0;0;0;0;0;0;0;0	2;2;2;2;2;1;1;1;0;0;0;0;0;0;0;0	Enolase;Gamma-enolase	Eno2;Eno1	;;;;;;;;;	16	4	2	2	3	1	0	1	1	3	1	2	2	1	0	0	0	0	1	0	1	1	1	0	0	0	0	1	0	1	1	20.3	10.5	10.5	34.804	315	315;338;434;434;434;122;162;391;58;67;37;70;80;196;434;434	0.0023256	1.9265	By MS/MS	By matching
A8DUK0;P02088;A8DUL5;A8DUP5;A8DUP7;A8DUM2;A8DUP3;A8DUK2;B1Q450;A8DUK7;A8DUK4;E9Q223;A8DUP0;A8DUL2;A8DUL0;A8DUQ5;Q61650;A8DUL7;Q61348	A8DUK0;P02088;A8DUL5;A8DUP5;A8DUP7;A8DUM2;A8DUP3;A8DUK2;B1Q450;A8DUK7;A8DUK4;E9Q223;A8DUP0;A8DUL2;A8DUL0;A8DUQ5	8;8;7;7;7;7;6;6;5;5;5;4;4;4;4;4;3;3;2	6;6;5;5;5;5;5;4;3;3;3;3;3;2;2;2;2;1;2	2;2;1;2;2;2;2;0;1;0;0;0;0;0;0;0;2;0;2	Hemoglobin subunit beta-1	Hbbt1;Hbb-b1;HBB1;Hbb-bs	;;;;;;;;;;;;;;;	19	8	6	2	7	3	3	3	2	7	2	5	2	5	1	1	1	0	5	0	3	0	1	0	0	0	0	2	0	1	0	68.7	55.8	15	15.84	147	147;147;147;147;147;147;147;151;147;147;147;103;147;147;147;147;52;147;31	0	15.082	By MS/MS	By matching	By matching
Q9CQ52;A2A9U8	Q9CQ52	7;1	6;1	6;1	Chymotrypsin-like elastase family member 3B	Cela3b		2	7	6	6	4	4	4	5	3	5	3	1	1	4	4	4	5	2	5	2	1	1	4	4	4	5	2	5	2	1	1	38.7	36.1	36.1	28.904	269	269;283	0	24.005	By MS/MS	By MS/MS	By MS/MS
Q9QZH3	Q9QZH3	1	1	1	Peptidyl-prolyl cis-trans isomerase E	Ppie		1	1	1	1	0	0	0	0	0	0	1	1	1	0	0	0	0	0	0	1	1	1	0	0	0	0	0	0	1	1	1	3	3	3	33.448	301	301	0.006237	1.258
B2RQ03;Q9D2H8-2;Q9D2H8	B2RQ03;Q9D2H8-2;Q9D2H8	1;1;1	1;1;1	1;1;1	Fibronectin type III domain-containing protein 8	Fndc8	;;	3	1	1	1	0	0	0	0	0	0	1	1	1	0	0	0	0	0	0	1	1	1	0	0	0	0	0	0	1	1	1	3.7	3.7	3.7	35.618	321	321;252;321	1	-2
Q3V206	Q3V206	1	1	1		Ptrh1		1	1	1	1	0	1	1	1	1	1	1	1	1	0	1	1	1	1	1	1	1	1	0	1	1	1	1	1	1	1	1	7.2	7.2	7.2	22.047	209	209	0.0098232	1.0891		By matching	By matching
B9EIU2;V9GZG9;V9GZQ6;V9GZJ5	B9EIU2;V9GZG9;V9GZQ6;V9GZJ5	8;7;7;6	2;1;1;1	1;0;0;0		C4a;Slp	;;;	4	8	2	1	4	4	4	4	7	2	5	7	4	0	0	0	0	2	0	1	2	1	0	0	0	0	1	0	1	1	1	4.2	1.7	0.4	193.73	1735	1735;1716;1735;1735	0.0061475	1.2274	By matching	By matching	By matching
A0A0J9YUH8	A0A0J9YUH8	1	1	1				1	1	1	1	1	1	1	1	1	1	1	1	1	1	1	1	1	1	1	1	1	1	1	1	1	1	1	1	1	1	1	11	11	11	8.8338	73	73	0.0099206	1.1334	By MS/MS	By MS/MS	By MS/MS
A0A0A6YWU2;E9Q589;A0A0A6YY47;E9QB01;P13595-4;P13595-3;P13595-2;P13595;A0A0A6YY91	A0A0A6YWU2;E9Q589;A0A0A6YY47;E9QB01;P13595-4;P13595-3;P13595-2;P13595;A0A0A6YY91	3;3;3;3;3;3;3;3;2	3;3;3;3;3;3;3;3;2	3;3;3;3;3;3;3;3;2	Neural cell adhesion molecule 1	Ncam1	;;;;;;;;	9	3	3	3	0	1	2	1	1	0	1	2	1	0	1	2	1	1	0	1	2	1	0	1	2	1	1	0	1	2	1	7.3	7.3	7.3	67.305	605	605;725;848;849;605;725;848;1115;1089	0	5.6582		By MS/MS	By MS/MS
Q5F209;Q5QNQ6	Q5F209;Q5QNQ6	1;1	1;1	1;1	Oxysterol-binding protein 2	Osbp2	;	2	1	1	1	0	1	0	0	1	0	1	1	1	0	1	0	0	1	0	1	1	1	0	1	0	0	1	0	1	1	1	11.6	11.6	11.6	17.521	155	155;908	0.0045045	1.6797		By matching
B7FAV1;B9EKP5;B7FAU9;Q8BTM8;F7AVL7;I7HPX4;F6Z2C0;Q3U7N9;Q6KAM8;D3YW87;D3Z576;Q8VHX6-2;Q8VHX6	B7FAV1;B9EKP5;B7FAU9;Q8BTM8;F7AVL7;I7HPX4;F6Z2C0;Q3U7N9;Q6KAM8;D3YW87;D3Z576;Q8VHX6-2;Q8VHX6	2;2;2;2;1;1;1;1;1;1;1;1;1	2;2;2;2;1;1;1;1;1;1;1;1;1	2;2;2;2;1;1;1;1;1;1;1;1;1	Filamin-A;Filamin-C	Flna;Flnc	;;;;;;;;;;;;	13	2	2	2	0	0	0	0	1	0	1	2	1	0	0	0	0	1	0	1	2	1	0	0	0	0	1	0	1	2	1	1.7	1.7	1.7	274.63	2583	2583;2639;2639;2647;74;280;281;1061;1952;2693;2726;2693;2726	0.002331	1.927
Q8R1M0	Q8R1M0	1	1	1	Embryonic stem cell-specific 5-hydroxymethylcytosine-binding protein	Hmces		1	1	1	1	0	0	0	0	1	0	1	1	1	0	0	0	0	1	0	1	1	1	0	0	0	0	1	0	1	1	1	4.5	4.5	4.5	40.168	353	353	0.0060976	1.2103
Q3UKB4;Q3TYS4;Q3TAW4;Q9D662;A2AN97;A2AN98;A2AN99;A2ANA0;Q3U2Q0;Q3TIS3;Q8CDS4	Q3UKB4;Q3TYS4;Q3TAW4;Q9D662;A2AN97;A2AN98;A2AN99;A2ANA0;Q3U2Q0;Q3TIS3	3;3;3;3;2;2;2;2;2;2;1	3;3;3;3;2;2;2;2;2;2;1	3;3;3;3;2;2;2;2;2;2;1	Protein transport protein Sec23B	Sec23b	;;;;;;;;;	11	3	3	3	1	0	0	0	0	1	0	3	1	1	0	0	0	0	1	0	3	1	1	0	0	0	0	1	0	3	1	8.1	8.1	8.1	86.402	767	767;767;767;767;59;122;138;278;295;767;615	0.0044944	1.6613	By MS/MS
D6RI51;Q9JLT2	D6RI51;Q9JLT2	1;1	1;1	1;1	Trehalase	Treh	;	2	1	1	1	1	1	1	1	1	1	0	1	1	1	1	1	1	1	1	0	1	1	1	1	1	1	1	1	0	1	1	4.7	4.7	4.7	17.255	150	150;576	0.006263	1.2734	By MS/MS	By MS/MS	By MS/MS
Q9D7Y7;Q9CPN9	Q9D7Y7;Q9CPN9	5;5;1;1;1;1;1;1;1	5;5;1;1;1;1;1;1;1	5;5;1;1;1;1;1;1;1		2210010C04Rik	;	9	5	5	5	4	3	3	3	3	4	0	1	2	4	3	3	3	3	4	0	1	2	4	3	3	3	3	4	0	1	2	34.4	34.4	34.4	26.407	247	247;247;1473;1489;1506;1544;1549;1561;1577	0	19.455	By MS/MS	By MS/MS	By MS/MS
Q9DCY1;P24369;Q6ZQM2	Q9DCY1;P24369	6;6;2	6;6;2	6;6;2	Peptidyl-prolyl cis-trans isomerase;Peptidyl-prolyl cis-trans isomerase B	Ppib	;	3	6	6	6	3	2	2	0	1	4	0	1	1	3	2	2	0	1	4	0	1	1	3	2	2	0	1	4	0	1	1	25	25	25	23.713	216	216;216;142	0	7.1663	By MS/MS	By matching	By MS/MS
A0A0R4J2A0;Q5SW75;Q5SW75-2;Q5SW75-4	A0A0R4J2A0;Q5SW75;Q5SW75-2;Q5SW75-4	1;1;1;1	1;1;1;1	1;1;1;1	Protein phosphatase Slingshot homolog 2	Ssh2	;;;	4	1	1	1	0	1	0	0	0	0	0	1	1	0	1	0	0	0	0	0	1	1	0	1	0	0	0	0	0	1	1	0.8	0.8	0.8	158.81	1429	1429;1423;1430;1450	1	-2		By MS/MS
Q8BTA2;Q61206	Q8BTA2;Q61206	1;1	1;1	1;1	Platelet-activating factor acetylhydrolase IB subunit beta	Pafah1b2	;	2	1	1	1	0	0	0	0	0	0	0	1	1	0	0	0	0	0	0	0	1	1	0	0	0	0	0	0	0	1	1	12.8	12.8	12.8	16.614	148	148;229	0	3.5593
A0A0R4J1D3;A0A0R4J020;Q3U1U7-3;Q3U1U7-2;Q3U1U7	A0A0R4J1D3;A0A0R4J020;Q3U1U7-3;Q3U1U7-2;Q3U1U7	1;1;1;1;1	1;1;1;1;1	1;1;1;1;1	Aryl hydrocarbon receptor repressor	Ahrr	;;;;	5	1	1	1	0	0	0	0	0	0	0	1	1	0	0	0	0	0	0	0	1	1	0	0	0	0	0	0	0	1	1	1.2	1.2	1.2	63.32	573	573;701;299;573;701	1	-2
Q791M3;Q9CW47;P16301	Q791M3;Q9CW47;P16301	1;1;1	1;1;1	1;1;1	Phosphatidylcholine-sterol acyltransferase	Lcat	;;	3	1	1	1	0	0	0	0	1	0	1	0	1	0	0	0	0	1	0	1	0	1	0	0	0	0	1	0	1	0	1	2.3	2.3	2.3	49.764	438	438;444;438	0	5.043
Q1JUQ7;Q1JUQ8;Q1JUQ6;Q3ULN5;P26883	Q1JUQ7;Q1JUQ8;Q1JUQ6;Q3ULN5;P26883	1;1;1;1;1	1;1;1;1;1	1;1;1;1;1	Peptidyl-prolyl cis-trans isomerase;Peptidyl-prolyl cis-trans isomerase FKBP1A	Fkbp1a	;;;;	5	1	1	1	1	0	0	0	0	1	0	0	1	1	0	0	0	0	1	0	0	1	1	0	0	0	0	1	0	0	1	35.1	35.1	35.1	4.0215	37	37;59;62;108;108	0	2.3028	By MS/MS
D3Z6P0-2;D3Z6P0;F6S5U2;F6Q519	D3Z6P0-2;D3Z6P0;F6S5U2	11;11;6;3	11;11;6;3	11;11;6;3	Protein disulfide-isomerase A2	Pdia2	;;	4	11	11	11	10	4	6	2	1	11	0	0	1	10	4	6	2	1	11	0	0	1	10	4	6	2	1	11	0	0	1	24	24	24	57.959	524	524;527;225;154	0	19.772	By MS/MS	By MS/MS	By MS/MS
Q02257;F7CRC6;Q80VE7;Q3UZT7;Q02248;F7BAC9	Q02257	22;2;2;2;2;1	22;2;2;2;2;1	22;2;2;2;2;1	Junction plakoglobin	Jup		6	22	22	22	16	11	5	10	0	21	0	0	1	16	11	5	10	0	21	0	0	1	16	11	5	10	0	21	0	0	1	35.2	35.2	35.2	81.8	745	745;174;554;781;781;169	0	52.605	By MS/MS	By MS/MS	By MS/MS
Q8BUY8	Q8BUY8	1	1	1	G-protein coupled receptor-associated sorting protein 2	Gprasp2		1	1	1	1	1	1	1	1	0	1	0	0	1	1	1	1	1	0	1	0	0	1	1	1	1	1	0	1	0	0	1	1.9	1.9	1.9	92.801	826	826	0.006135	1.2271	By MS/MS	By MS/MS	By MS/MS
P68040	P68040	4	4	4	Guanine nucleotide-binding protein subunit beta-2-like 1;Guanine nucleotide-binding protein subunit beta-2-like 1, N-terminally processed	Gnb2l1		1	4	4	4	3	0	0	0	0	1	0	0	1	3	0	0	0	0	1	0	0	1	3	0	0	0	0	1	0	0	1	17.7	17.7	17.7	35.076	317	317	0	6.3087	By MS/MS
B2RSN3;Q9CWF2;Q7TMM9;Q99J49;G3UZR1;Q62363;D5MR34	B2RSN3;Q9CWF2;Q7TMM9;Q99J49	11;11;11;8;2;1;1	1;1;1;1;0;0;0	1;1;1;1;0;0;0	Tubulin beta-2B chain;Tubulin beta-2A chain	Tubb2b;Tubb2a	;;;	7	11	1	1	7	2	3	1	4	4	2	8	8	1	0	1	0	0	0	0	0	1	1	0	1	0	0	0	0	0	1	36.9	3.4	3.4	49.953	445	445;445;445;298;67;100;133	0	3.9446	By MS/MS	By matching	By matching
Q8BFZ3	Q8BFZ3	8	1	1	Beta-actin-like protein 2	Actbl2		1	8	1	1	4	4	5	4	7	4	6	5	6	0	1	1	0	0	0	0	0	1	0	1	1	0	0	0	0	0	1	24.5	3.2	3.2	42.004	376	376	1	-2	By matching	By MS/MS	By matching
A8IP69;P61982	A8IP69;P61982	4;4	2;2	2;2	14-3-3 protein gamma;14-3-3 protein gamma, N-terminally processed	Ywhag	;	2	4	2	2	3	1	1	3	1	2	1	1	3	1	0	0	1	0	0	0	0	2	1	0	0	1	0	0	0	0	2	20.6	13.4	13.4	28.302	247	247;247	0	17.536	By MS/MS	By matching	By matching
E9Q7H5;Q6PFA7;B2RXM2;Q0VG47;J3QNY1;Q8BG05-2;Q6P6I7;A2AL12;Q5FB19;Q3UZG3;Q8BG05;Q5U3M2;Q58E39;V9GX38	E9Q7H5;Q6PFA7;B2RXM2;Q0VG47;J3QNY1;Q8BG05-2;Q6P6I7;A2AL12;Q5FB19;Q3UZG3;Q8BG05;Q5U3M2	4;4;4;4;4;4;3;3;3;3;3;2;1;1	4;4;4;4;4;4;3;3;3;3;3;2;1;1	4;4;4;4;4;4;3;3;3;3;3;2;1;1	Heterogeneous nuclear ribonucleoprotein A3	Gm8991;Hnrnpa3;Gm6793;Gm9242	;;;;;;;;;;;	14	4	4	4	2	0	0	0	0	1	1	1	3	2	0	0	0	0	1	1	1	3	2	0	0	0	0	1	1	1	3	15.3	15.3	15.3	32.574	300	300;303;351;357;357;357;318;318;379;379;379;313;263;357	0	2.9428	By MS/MS
P11679	P11679	15;10;5;5;4	7;2;1;1;1	7;2;1;1;1	Keratin, type II cytoskeletal 8	Krt8	;	5	15	7	7	13	8	8	8	4	14	4	6	5	6	1	1	1	1	6	1	1	1	6	1	1	1	1	6	1	1	1	22.2	15.1	15.1	54.565	490	490;483;99;443;499	0	11.442	By MS/MS	By matching	By matching
Q642I5;Q9DBB9	Q642I5;Q9DBB9	1;1	1;1	1;1	Carboxypeptidase N subunit 2	Cpn2	;	2	1	1	1	1	1	1	1	1	1	1	1	1	1	1	1	1	1	1	1	1	1	1	1	1	1	1	1	1	1	1	1.9	1.9	1.9	45.709	413	413;547	0.0097656	1.0675	By MS/MS	By MS/MS	By MS/MS
B2RS76	B2RS76	15	15	14		Cpb1		1	15	15	14	11	7	9	8	4	13	2	2	3	11	7	9	8	4	13	2	2	3	10	7	8	8	4	13	2	2	3	47.7	47.7	45.8	47.573	415	415	0	83.392	By MS/MS	By MS/MS	By MS/MS
P05208	P05208	7	7	7	Chymotrypsin-like elastase family member 2A	Cela2a		1	7	7	7	3	4	3	3	5	5	1	2	1	3	4	3	3	5	5	1	2	1	3	4	3	3	5	5	1	2	1	47.2	47.2	47.2	28.913	271	271	0	52.905	By MS/MS	By MS/MS	By MS/MS
Q8C5B4;E9PV85;Q61297;Q61298	Q8C5B4;E9PV85	25;16;8;7	1;0;0;1	1;0;0;1	Alpha-amylase	Amy2a1	;	4	25	1	1	17	21	16	19	21	20	11	11	9	1	1	1	1	1	1	1	1	1	1	1	1	1	1	1	1	1	1	61.2	2.6	2.6	57.336	508	508;245;232;242	0	7.7055	By MS/MS	By MS/MS	By MS/MS
Q07797;E9Q5X5	Q07797	4;1	4;1	4;1	Galectin-3-binding protein	Lgals3bp		2	4	4	4	3	0	1	0	0	3	1	2	3	3	0	1	0	0	3	1	2	3	3	0	1	0	0	3	1	2	3	11.6	11.6	11.6	64.49	577	577;204	0	16.067	By MS/MS		By matching
A0A087WP24;A0A087WRJ2;A0A087WPF8;A0A087WQN8;A0A087WSR2;E9QN99;Q8VCR7	A0A087WP24;A0A087WRJ2;A0A087WPF8;A0A087WQN8;A0A087WSR2;E9QN99;Q8VCR7	1;1;1;1;1;1;1	1;1;1;1;1;1;1	1;1;1;1;1;1;1	Alpha/beta hydrolase domain-containing protein 14B	Abhd14b	;;;;;;	7	1	1	1	1	1	0	1	1	0	1	1	1	1	1	0	1	1	0	1	1	1	1	1	0	1	1	0	1	1	1	7.7	7.7	7.7	14.948	142	142;151;174;183;194;210;210	0.0064378	1.3555	By MS/MS	By matching
Q3TPE1;Q3TD35;Q3U017;Q2I0J8;Q2I0J7;E9QPU1;Q8CIZ8-2;Q8CIZ8	Q3TPE1;Q3TD35;Q3U017;Q2I0J8;Q2I0J7;E9QPU1;Q8CIZ8-2;Q8CIZ8	2;2;2;2;2;2;2;2	2;2;2;2;2;2;2;2	2;2;2;2;2;2;2;2	von Willebrand factor;von Willebrand antigen 2	Vwf	;;;;;;;	8	2	2	2	0	2	1	2	1	0	1	1	1	0	2	1	2	1	0	1	1	1	0	2	1	2	1	0	1	1	1	10.4	10.4	10.4	44.796	405	405;420;1126;2813;2813;2813;402;2813	0	3.7363		By MS/MS	By MS/MS
B1ASQ1;Q9D4F3	B1ASQ1;Q9D4F3	1;1	1;1	1;1		4932442L08Rik	;	2	1	1	1	0	0	0	0	0	0	1	1	1	0	0	0	0	0	0	1	1	1	0	0	0	0	0	0	1	1	1	50	50	50	2.3985	22	22;419	1	-2
Q99PT1	Q99PT1	4	4	4	Rho GDP-dissociation inhibitor 1	Arhgdia		1	4	4	4	3	1	1	0	1	2	1	1	1	3	1	1	0	1	2	1	1	1	3	1	1	0	1	2	1	1	1	41.2	41.2	41.2	23.407	204	204	0	38.973	By MS/MS	By matching	By MS/MS
P12960	P12960	3	3	3	Contactin-1	Cntn1		1	3	3	3	1	1	1	2	2	0	1	2	1	1	1	1	2	2	0	1	2	1	1	1	1	2	2	0	1	2	1	4.2	4.2	4.2	113.39	1020	1020	0	6.0493	By matching	By MS/MS	By MS/MS
D3YWB5;D3YTN4	D3YWB5;D3YTN4	1;1	1;1	1;1		Gimap4	;	2	1	1	1	0	0	0	0	1	0	1	1	1	0	0	0	0	1	0	1	1	1	0	0	0	0	1	0	1	1	1	5.5	5.5	5.5	23.539	200	200;328	0.0063291	1.3022
Q3UEM7;Q3UER8;Q8VCM7	Q3UEM7;Q3UER8;Q8VCM7	2;2;2	2;2;2	2;2;2	Fibrinogen gamma chain	Fgg	;;	3	2	2	2	0	0	0	0	1	0	1	1	2	0	0	0	0	1	0	1	1	2	0	0	0	0	1	0	1	1	2	4.4	4.4	4.4	49.391	436	436;443;436	0	9.2332
H3BJZ7;Q4KUS2	H3BJZ7;Q4KUS2	1;1	1;1	1;1	Protein unc-13 homolog A	Unc13a	;	2	1	1	1	0	0	0	0	1	0	1	1	1	0	0	0	0	1	0	1	1	1	0	0	0	0	1	0	1	1	1	1.5	1.5	1.5	195.83	1731	1731;1712	1	-2
Q3UVI6;Q6P5D4	Q3UVI6;Q6P5D4	2;2	2;2	2;2	Centrosomal protein of 135 kDa	Cep135	;	2	2	2	2	0	0	0	0	1	0	2	1	1	0	0	0	0	1	0	2	1	1	0	0	0	0	1	0	2	1	1	3	3	3	120.61	1031	1031;1140	0.0063559	1.3082
Q8CG46-2;Q8CG46	Q8CG46-2;Q8CG46	1;1	1;1	1;1	Structural maintenance of chromosomes protein 5	Smc5	;	2	1	1	1	1	1	1	1	1	1	0	1	1	1	1	1	1	1	1	0	1	1	1	1	1	1	1	1	0	1	1	1	1	1	127.38	1087	1087;1101	1	-2	By MS/MS	By MS/MS	By matching
A0A0A0MQM0;P63242;Q8BGY2;Q8VHU9;J3QPS8	A0A0A0MQM0;P63242;Q8BGY2	3;3;2;1;1	3;3;2;1;1	2;2;1;0;1	Eukaryotic translation initiation factor 5A;Eukaryotic translation initiation factor 5A-1;Eukaryotic translation initiation factor 5A-2	Eif5a;Eif5a2	;;	5	3	3	2	2	0	0	0	1	2	0	1	2	2	0	0	0	1	2	0	1	2	2	0	0	0	0	2	0	1	1	22.1	22.1	16.8	16.302	149	149;154;153;61;76	0.006383	1.3182	By MS/MS
P52480-2	P52480-2	17	1	1	Pyruvate kinase PKM	Pkm		1	17	1	1	14	1	1	5	0	11	0	9	11	0	0	0	0	0	0	0	0	1	0	0	0	0	0	0	0	0	1	40.5	1.5	1.5	57.984	531	531	0.00611	1.2106	By matching	By matching	By matching
Q3UUX9;Q3TIY6;Q3UC72;Q3UPA3;Q61598-2;Q61598;Q9CZ18	Q3UUX9;Q3TIY6;Q3UC72;Q3UPA3;Q61598-2;Q61598	9;9;9;9;9;9;3	5;5;5;5;5;5;1	5;5;5;5;5;5;1	Rab GDP dissociation inhibitor beta	Gdi2	;;;;;	7	9	5	5	7	2	2	1	0	5	0	5	2	4	2	2	1	0	3	0	2	1	4	2	2	1	0	3	0	2	1	25.4	12.6	12.6	50.507	445	445;445;509;512;409;445;230	0	9.5911	By MS/MS	By matching	By MS/MS
Q5M8R8;Q5FWB6;P14869;S4R1N1;E9Q070;D3YVM5;O89073	Q5M8R8;Q5FWB6;P14869;S4R1N1;E9Q070;D3YVM5	5;5;5;4;4;3;1	5;5;5;4;4;3;1	5;5;5;4;4;3;1	60S acidic ribosomal protein P0	Rplp0;Gm8730	;;;;;	7	5	5	5	3	2	1	0	0	1	0	3	5	3	2	1	0	0	1	0	3	5	3	2	1	0	0	1	0	3	5	21.5	21.5	21.5	34.216	317	317;317;317;221;317;145;131	0	9.2286	By MS/MS	By MS/MS	By matching
Q4FJQ6;Q3U3L3;Q60854;E9Q5Q5;E9PZQ9;E9Q4R2;E9PYY0;E9Q3Y1;Q8BZR2;E9Q6X2;E9Q108;E9Q0P9;K7E6F1;F8WIV2	Q4FJQ6;Q3U3L3;Q60854;E9Q5Q5;E9PZQ9;E9Q4R2;E9PYY0;E9Q3Y1;Q8BZR2;E9Q6X2;E9Q108;E9Q0P9;K7E6F1;F8WIV2	2;2;2;1;1;1;1;1;1;1;1;1;1;1	2;2;2;1;1;1;1;1;1;1;1;1;1;1	2;2;2;1;1;1;1;1;1;1;1;1;1;1	Serpin B6	Serpinb6a;Serpinb6	;;;;;;;;;;;;;	14	2	2	2	1	0	0	0	0	1	0	1	1	1	0	0	0	0	1	0	1	1	1	0	0	0	0	1	0	1	1	7.7	7.7	7.7	42.598	378	378;378;378;18;68;73;120;144;156;162;188;193;228;399	0.0066079	1.505	By MS/MS
Q3TLL6;Q4FZL1;Q5F2A7;Q3UXC2;Q3TGK7;Q3TFG3;P60843;Q3TSJ4;Q78WR5;Q3U8I0;Q8BTU6;Q52KC1;P10630;P10630-2;E9Q561	Q3TLL6;Q4FZL1;Q5F2A7;Q3UXC2;Q3TGK7;Q3TFG3;P60843;Q3TSJ4;Q78WR5;Q3U8I0;Q8BTU6;Q52KC1;P10630;P10630-2;E9Q561	4;4;4;4;4;4;4;3;3;3;3;3;3;3;2	4;4;4;4;4;4;4;3;3;3;3;3;3;3;2	4;4;4;4;4;4;4;3;3;3;3;3;3;3;2	Eukaryotic initiation factor 4A-I;Eukaryotic initiation factor 4A-II;Eukaryotic initiation factor 4A-II, N-terminally processed	Eif4a1;Eif4a2	;;;;;;;;;;;;;;	15	4	4	4	4	2	2	1	0	2	0	1	1	4	2	2	1	0	2	0	1	1	4	2	2	1	0	2	0	1	1	14.3	14.3	14.3	41.49	364	364;405;406;406;406;406;406;225;236;286;362;407;407;408;312	0	9.3588	By MS/MS	By matching	By matching
Q4FZK2;Q9D8N0;Q8R1N8	Q4FZK2;Q9D8N0;Q8R1N8	4;4;3	4;4;3	4;4;3	Elongation factor 1-gamma	Eef1g	;;	3	4	4	4	3	0	1	0	0	3	0	1	2	3	0	1	0	0	3	0	1	2	3	0	1	0	0	3	0	1	2	9.8	9.8	9.8	50.06	437	437;437;317	0	4.3138	By MS/MS		By matching
P99027	P99027	3	3	3	60S acidic ribosomal protein P2	Rplp2		1	3	3	3	3	1	1	0	0	3	0	1	1	3	1	1	0	0	3	0	1	1	3	1	1	0	0	3	0	1	1	50.4	50.4	50.4	11.651	115	115	0	12.284	By MS/MS	By matching	By MS/MS
Q8R393;Q63ZW9;Q8BTF0;F8WHL2;Q8CIE6;Q99JW9;Q8BTF3	Q8R393;Q63ZW9;Q8BTF0;F8WHL2;Q8CIE6;Q99JW9;Q8BTF3	2;2;2;2;2;1;1	2;2;2;2;2;1;1	2;2;2;2;2;1;1	Coatomer subunit alpha;Coatomer subunit alpha;Xenin;Proxenin	Copa	;;;;;;	7	2	2	2	1	0	0	0	0	0	0	1	1	1	0	0	0	0	0	0	1	1	1	0	0	0	0	0	0	1	1	6.4	6.4	6.4	64.676	580	580;1131;1224;1233;1224;300;470	0	2.7484	By MS/MS
F6Q609;E9Q133;Q3U0I3;Q3U4U6;P80318	F6Q609;E9Q133;Q3U0I3;Q3U4U6;P80318	1;1;1;1;1	1;1;1;1;1	1;1;1;1;1	T-complex protein 1 subunit gamma	Cct3	;;;;	5	1	1	1	0	0	0	0	0	0	0	1	1	0	0	0	0	0	0	0	1	1	0	0	0	0	0	0	0	1	1	8.5	8.5	8.5	34.318	307	307;507;521;545;545	0.0044843	1.641
Q9Z2R8;Q3TXB7;F8WI14;B7ZNR0;Q9QX30;Q3TDX7;Q61508-2;Q61508	Q9Z2R8;Q3TXB7;F8WI14;B7ZNR0;Q9QX30;Q3TDX7;Q61508-2;Q61508	1;1;1;1;1;1;1;1	1;1;1;1;1;1;1;1	1;1;1;1;1;1;1;1	Extracellular matrix protein 1	Ecm1	;;;;;;;	8	1	1	1	0	0	0	0	0	0	0	1	1	0	0	0	0	0	0	0	1	1	0	0	0	0	0	0	0	1	1	2.1	2.1	2.1	48.358	434	434;558;558;558;559;559;434;559	0.0045455	1.7972
A2A5N2;Q9CQV8-2;Q9CQV8;A2A5N1	A2A5N2;Q9CQV8-2;Q9CQV8;A2A5N1	4;4;4;2	1;1;1;1	1;1;1;1	14-3-3 protein beta/alpha;14-3-3 protein beta/alpha, N-terminally processed	Ywhab	;;;	4	4	1	1	3	2	2	3	2	3	1	3	3	0	0	0	0	0	0	0	1	1	0	0	0	0	0	0	0	1	1	16.7	5.7	5.7	28.086	246	246;244;246;159	0	23.258	By matching	By matching	By matching
P68510	P68510	3	1	1	14-3-3 protein eta	Ywhah		1	3	1	1	2	1	1	2	1	2	1	2	2	0	0	0	0	0	0	0	1	1	0	0	0	0	0	0	0	1	1	13.4	6.1	6.1	28.211	246	246	0	2.1308	By matching	By matching	By matching
P68369;Q52L87;Q3TIZ0;P68373;Q5FW91;P05214;Q9D9Y2;Q9JJZ2	P68369;Q52L87;Q3TIZ0;P68373;Q5FW91;P05214;Q9D9Y2	17;16;16;16;14;14;9;8	1;1;1;1;1;1;1;1	1;1;1;1;1;1;1;1	Tubulin alpha-1A chain;Tubulin alpha-1C chain;Tubulin alpha-3 chain	Tuba1a;Tuba1c;Tuba3a	;;;;;;	8	17	1	1	13	5	3	7	3	9	5	8	15	1	0	0	0	0	0	0	1	1	1	0	0	0	0	0	0	1	1	50.3	2.9	2.9	50.135	451	451;449;449;449;450;450;395;449	0	3.9337	By MS/MS	By matching	By matching
A3KML3;F6YY69;F6VW30;P68254-2;P68254	A3KML3;F6YY69;F6VW30;P68254-2;P68254	7;7;7;7;7	4;4;4;4;4	4;4;4;4;4	14-3-3 protein theta	Ywhaq	;;;;	5	7	4	4	6	2	2	3	3	3	1	3	5	3	0	0	0	1	0	0	1	3	3	0	0	0	1	0	0	1	3	36.3	25.3	25.3	27.778	245	245;285;303;243;245	0	55.688	By MS/MS	By matching	By matching
P97807-2;P97807;H3BKG7	P97807-2;P97807	5;5;2	5;5;2	5;5;2	Fumarate hydratase, mitochondrial	Fh	;	3	5	5	5	2	0	0	1	1	1	1	4	2	2	0	0	1	1	1	1	4	2	2	0	0	1	1	1	1	4	2	21.8	21.8	21.8	50.052	467	467;507;167	0	14.183	By MS/MS
Q3TED3;Q3V117;Q91V92;Q3UEA1;Q8VDM8;Q3UVY4;Q3TS02;Q99K05;Q6P063	Q3TED3;Q3V117;Q91V92;Q3UEA1;Q8VDM8	33;33;33;30;19;12;12;7;3	33;33;33;30;19;12;12;7;3	33;33;33;30;19;12;12;7;3	ATP-citrate synthase	Acly	;;;;	9	33	33	33	19	2	2	6	3	7	1	24	25	19	2	2	6	3	7	1	24	25	19	2	2	6	3	7	1	24	25	40.1	40.1	40.1	119.62	1091	1091;1101;1091;1034;592;436;491;195;117	0	126.78	By MS/MS	By matching	By MS/MS
S4R2B5;Q6R6I7	S4R2B5;Q6R6I7	1;1	1;1	1;1	Relaxin receptor 1	Rxfp1	;	2	1	1	1	1	1	1	1	1	1	1	1	1	1	1	1	1	1	1	1	1	1	1	1	1	1	1	1	1	1	1	13.7	13.7	13.7	11.191	102	102;758	0.0096154	1.0389	By MS/MS	By MS/MS	By MS/MS
A0A0U1RQ57	A0A0U1RQ57	1	1	1				1	1	1	1	1	1	1	0	1	1	1	1	1	1	1	1	0	1	1	1	1	1	1	1	1	0	1	1	1	1	1	6.6	6.6	6.6	25.283	226	226	1	-2	By matching	By MS/MS	By matching
Q5RKP4;Q8BMR3;Q3U900;Q91YQ5;Q99LY0	Q5RKP4;Q8BMR3;Q3U900;Q91YQ5;Q99LY0	3;3;3;3;2	3;3;3;3;2	3;3;3;3;2	Dolichyl-diphosphooligosaccharide--protein glycosyltransferase subunit 1	Rpn1	;;;;	5	3	3	3	2	0	1	0	1	1	1	1	1	2	0	1	0	1	1	1	1	1	2	0	1	0	1	1	1	1	1	5.4	5.4	5.4	68.396	607	607;608;608;608;280	0.0064935	1.3922	By MS/MS		By MS/MS
Q61425	Q61425	5	5	5	Hydroxyacyl-coenzyme A dehydrogenase, mitochondrial	Hadh		1	5	5	5	1	0	0	0	1	1	1	4	3	1	0	0	0	1	1	1	4	3	1	0	0	0	1	1	1	4	3	18.8	18.8	18.8	34.463	314	314	0	14.895	By MS/MS
Q543J5;P32261	Q543J5;P32261	10;10	1;1	1;1	Antithrombin-III	Serpinc1	;	2	10	1	1	8	8	8	7	9	6	9	8	7	1	1	1	1	1	0	0	1	1	1	1	1	1	1	0	0	1	1	20	4.9	4.9	52.003	465	465;465	0	6.4548	By MS/MS	By MS/MS	By MS/MS
A6H6Q4	A6H6Q4	1	1	1	Uncharacterized protein C19orf71 homolog			1	1	1	1	1	1	1	1	1	1	1	1	1	1	1	1	1	1	1	1	1	1	1	1	1	1	1	1	1	1	1	4.4	4.4	4.4	23.954	206	206	1	-2	By MS/MS	By MS/MS	By MS/MS
P09411;S4R2M7;P09041	P09411	11;5;2	11;5;2	11;5;2	Phosphoglycerate kinase 1	Pgk1		3	11	11	11	10	1	1	3	1	6	1	3	4	10	1	1	3	1	6	1	3	4	10	1	1	3	1	6	1	3	4	31.7	31.7	31.7	44.55	417	417;255;417	0	15.477	By MS/MS	By matching	By matching
P99024;Q80ZV2	P99024	13;5	4;1	3;1	Tubulin beta-5 chain	Tubb5		2	13	4	3	7	2	2	1	5	5	4	9	9	2	0	0	0	1	2	2	2	3	1	0	0	0	1	1	2	1	2	45.7	15.5	12.2	49.67	444	444;186	0	4.6421	By MS/MS	By matching	By matching
Q5SX49;Q8CEH8;Q5SX50;P62962;Q3U7V7;J3QMC2	Q5SX49;Q8CEH8;Q5SX50;P62962;Q3U7V7	5;5;5;5;4;2	2;2;2;2;2;1	2;2;2;2;2;1	Profilin;Profilin-1	Pfn1	;;;;	6	5	2	2	4	4	4	4	4	4	3	5	4	1	1	1	1	1	1	0	2	1	1	1	1	1	1	1	0	2	1	72.3	36.6	36.6	11.82	112	112;140;140;140;140;55	0	7.3583	By MS/MS	By MS/MS	By matching
Q53ZU7;O08709;Q6GT24;D3Z0Y2;Q6A0D0;Q8BPD3;Q8BG37;A0A0A6YXQ7	Q53ZU7;O08709;Q6GT24;D3Z0Y2;Q6A0D0;Q8BPD3	8;8;7;6;6;5;2;1	8;8;7;6;6;5;2;1	8;8;7;6;6;5;2;1	Peroxiredoxin-6	Prdx6	;;;;;	8	8	8	8	4	2	2	3	1	4	1	4	3	4	2	2	3	1	4	1	4	3	4	2	2	3	1	4	1	4	3	47.3	47.3	47.3	24.87	224	224;224;224;200;227;178;224;76	0	37.972	By MS/MS	By matching	By MS/MS
Q5NC82;E9PZF0;Q01768;B0LAA8;Q8R4B4;Q5NC80;Q5NC79	Q5NC82;E9PZF0;Q01768;B0LAA8;Q8R4B4	9;9;9;8;6;4;2	9;9;9;8;6;4;2	5;5;5;4;2;0;0	Nucleoside diphosphate kinase;Nucleoside diphosphate kinase B	Nme2;Gm20390	;;;;	7	9	9	5	6	2	2	2	2	5	1	6	5	6	2	2	2	2	5	1	6	5	2	0	0	1	1	1	0	3	2	74.3	74.3	44.1	17.363	152	152;267;152;144;365;127;117	0	35.129	By MS/MS	By MS/MS	By MS/MS
Q8VC94;A2BH06;E9PZB3;E9PYL9;Q9CXW4	Q8VC94;A2BH06;E9PZB3;E9PYL9;Q9CXW4	2;2;2;2;2	2;2;2;2;2	2;2;2;2;2	60S ribosomal protein L11	Rpl11;Gm5093;Gm10036	;;;;	5	2	2	2	2	0	0	1	1	2	1	1	2	2	0	0	1	1	2	1	1	2	2	0	0	1	1	2	1	1	2	12.6	12.6	12.6	19.024	167	167;172;174;178;178	0	5.3635	By MS/MS
Q8C153;Q3UZ14;Q3UMI7;Q3UDC8;Q3TX47;Q3TWX1;Q3TLB1;Q3TJZ1;P58252;Q6P9L9;Q8BMA8;Q3TW58;Q3UBL9;Q3TK17;Q3TSK4;Q3TPG2;Q99LT6;Q61509;O89070;O89069	Q8C153;Q3UZ14;Q3UMI7;Q3UDC8;Q3TX47;Q3TWX1;Q3TLB1;Q3TJZ1;P58252;Q6P9L9;Q8BMA8;Q3TW58;Q3UBL9;Q3TK17;Q3TSK4;Q3TPG2;Q99LT6	17;17;17;17;17;17;17;17;17;16;16;16;16;16;12;11;9;8;1;1	17;17;17;17;17;17;17;17;17;16;16;16;16;16;12;11;9;8;1;1	17;17;17;17;17;17;17;17;17;16;16;16;16;16;12;11;9;8;1;1	Elongation factor 2	Eef2	;;;;;;;;;;;;;;;;	20	17	17	17	10	2	1	3	2	5	1	8	11	10	2	1	3	2	5	1	8	11	10	2	1	3	2	5	1	8	11	26	26	26	95.257	858	858;858;858;858;858;858;858;858;858;843;858;858;858;858;418;367;287;268;109;259	0	33.316	By MS/MS	By MS/MS	By matching
Q3UBA6;Q3TZJ3;Q3TH56;Q3TEK2;P63017;Q504P4;Q3U9L2;Q3TF16;Q3TQ13;Q3UDS0;Q3ULM1;Q3TRH3;Q3TB63;Q3KQJ4;Q3TH04;Q3UXU1;B7U582;P17156;D3Z5E2;D3YW43;Q3UBR0;B2CSK2;A1L347;Q3TU85;Q3TAI8;A1E2B8;P16627;Q61696;P17879;Q9R2A1;Q61698;Q9QWU1;O88687;O88688;Q91ZU5;Q91ZU4	Q3UBA6;Q3TZJ3;Q3TH56;Q3TEK2;P63017;Q504P4;Q3U9L2;Q3TF16;Q3TQ13;Q3UDS0;Q3ULM1;Q3TRH3;Q3TB63;Q3KQJ4;Q3TH04	21;21;21;21;21;20;20;20;20;19;19;19;17;16;14;10;7;7;5;5;5;4;4;4;4;4;4;4;4;2;2;2;1;1;1;1	19;19;19;19;19;18;18;18;18;17;18;18;15;15;13;10;5;5;4;4;5;2;2;3;3;3;2;3;3;1;2;1;0;1;1;1	19;19;19;19;19;18;18;18;18;17;18;18;15;15;13;10;5;5;4;4;5;2;2;3;3;3;2;3;3;1;2;1;0;1;1;1	Heat shock cognate 71 kDa protein	Hspa8	;;;;;;;;;;;;;;	36	21	19	19	15	3	4	4	1	14	2	17	19	13	1	2	2	1	12	2	15	17	13	1	2	2	1	12	2	15	17	45.4	43.7	43.7	70.898	646	646;646;646;646;646;627;646;646;646;553;619;646;459;565;518;396;633;633;116;158;251;641;641;641;641;641;641;641;642;111;228;552;43;143;282;461	0	84.459	By MS/MS	By matching	By MS/MS
Q3THH1;Q922R8;Q3TML0;Q3TJL8;Q9DAB4	Q3THH1;Q922R8;Q3TML0;Q3TJL8;Q9DAB4	7;7;6;6;5	7;7;6;6;5	7;7;6;6;5	Protein disulfide-isomerase A6	Pdia6	;;;;	5	7	7	7	6	2	3	2	1	6	1	6	6	6	2	3	2	1	6	1	6	6	6	2	3	2	1	6	1	6	6	22.2	22.2	22.2	48.657	445	445;440;445;445;391	0	58.138	By MS/MS	By matching	By MS/MS
P48036;A0A0G2JGQ0	P48036	13;5	13;5	13;5	Annexin A5	Anxa5		2	13	13	13	9	1	1	6	0	7	1	7	6	9	1	1	6	0	7	1	7	6	9	1	1	6	0	7	1	7	6	43.9	43.9	43.9	35.752	319	319;137	0	62.56	By MS/MS	By MS/MS	By matching
Q91V38;Q3UAD6;P08113;Q3UBU0;Q3TUD6;Q8CCY5;Q8C2R2;F7C312;Q9CW12	Q91V38;Q3UAD6;P08113;Q3UBU0;Q3TUD6;Q8CCY5	21;21;21;20;12;12;10;10;1	21;21;21;20;12;12;10;10;1	19;19;19;18;12;12;8;10;1	Endoplasmin	Hsp90b1	;;;;;	9	21	21	19	16	3	6	6	0	11	1	12	7	16	3	6	6	0	11	1	12	7	15	3	5	6	0	10	1	10	6	30.2	30.2	28.4	92.489	802	802;802;802;802;612;615;277;373;141	0	51.441	By MS/MS	By matching	By MS/MS
Q5EBQ2;Q3TGC5;P70296;D3Z1V4;D6RHS6	Q5EBQ2;Q3TGC5;P70296;D3Z1V4;D6RHS6	6;6;6;5;3	6;6;6;5;3	6;6;6;5;3	Phosphatidylethanolamine-binding protein 1;Hippocampal cholinergic neurostimulating peptide	Pebp1	;;;;	5	6	6	6	5	1	1	2	0	4	1	5	5	5	1	1	2	0	4	1	5	5	5	1	1	2	0	4	1	5	5	57.8	57.8	57.8	20.83	187	187;187;187;209;136	0	34.229	By MS/MS	By MS/MS	By MS/MS
E9Q704;F8VQA4;P97467;Q8BQ31;Q3V1A8;F6TGI4;F6T0D3;F7D4K4;A1L331	E9Q704;F8VQA4;P97467;Q8BQ31;Q3V1A8	13;13;13;7;7;2;1;1;1	13;13;13;7;7;2;1;1;1	13;13;13;7;7;2;1;1;1	Peptidyl-glycine alpha-amidating monooxygenase;Peptidylglycine alpha-hydroxylating monooxygenase;Peptidyl-alpha-hydroxyglycine alpha-amidating lyase	Pam	;;;;	9	13	13	13	7	2	0	8	0	11	1	3	1	7	2	0	8	0	11	1	3	1	7	2	0	8	0	11	1	3	1	17.9	17.9	17.9	97.175	873	873;978;979;367;519;150;169;189;215	0	25.726	By MS/MS	By matching
A2A5K2;Q4FJT5;Q3UFS5;P55065	A2A5K2;Q4FJT5;Q3UFS5;P55065	1;1;1;1	1;1;1;1	1;1;1;1	Phospholipid transfer protein	Pltp	;;;	4	1	1	1	0	1	0	1	1	0	1	1	1	0	1	0	1	1	0	1	1	1	0	1	0	1	1	0	1	1	1	3.2	3.2	3.2	49.022	441	441;493;493;493	0	4.8226		By MS/MS
Q3V1L5;Q7M739;F6ZDS4	Q3V1L5;Q7M739;F6ZDS4	1;1;1	1;1;1	1;1;1	Nucleoprotein TPR	Tpr	;;	3	1	1	1	0	1	0	0	1	0	1	1	1	0	1	0	0	1	0	1	1	1	0	1	0	0	1	0	1	1	1	1.1	1.1	1.1	144.43	1244	1244;2357;2431	0.0063694	1.3113		By MS/MS
P50396;D6RI86;B7FAU8	P50396	9;3;2	9;3;2	5;1;1	Rab GDP dissociation inhibitor alpha	Gdi1		3	9	9	5	6	0	0	1	1	5	1	6	2	6	0	0	1	1	5	1	6	2	3	0	0	1	1	3	1	3	1	32.2	32.2	19.5	50.521	447	447;78;149	0	107.35	By MS/MS
Q80Y52;Q3UIF3;Q3TKA2;P07901;Q3TJU7;A0PJ91;Q3TKB9;Q8C5U3;Q3TKG0;Q8C2A9;B7ZC50;A2A6A2;B7ZC49	Q80Y52;Q3UIF3;Q3TKA2;P07901;Q3TJU7;A0PJ91;Q3TKB9;Q8C5U3;Q3TKG0	14;14;14;14;12;12;11;11;11;4;3;1;1	9;9;9;9;9;7;7;7;7;1;0;0;0	9;9;9;9;9;7;7;7;7;1;0;0;0	Heat shock protein HSP 90-alpha	Hsp90aa1	;;;;;;;;	13	14	9	9	9	1	2	3	5	7	4	8	8	5	0	0	1	3	3	2	5	5	5	0	0	1	3	3	2	5	5	23.1	15.3	15.3	84.787	733	733;733;733;733;556;565;556;557;557;274;201;98;103	0	70.79	By MS/MS	By matching	By matching
A0A0A0MQA5;P68368;A0A087WRB4;A0A087WQS4;A0A087WSB0;A0A087WSL5;A0A087WS35	A0A0A0MQA5;P68368	16;16;5;5;3;3;1	3;3;2;2;2;2;1	3;3;2;2;2;2;1	Tubulin alpha-4A chain	Tuba4a	;	7	16	3	3	10	5	2	5	5	7	7	6	13	1	2	1	1	2	1	2	2	2	1	2	1	1	2	1	2	2	2	45.7	9.4	9.4	52.793	477	477;448;100;125;81;89;75	0	8.7483	By MS/MS	By MS/MS	By matching
Q99LL6;P11087-2;P11087;Q60785	Q99LL6;P11087-2;P11087;Q60785	6;6;6;4;1	6;6;6;4;1	6;6;6;4;1	Collagen alpha-1(I) chain	Col1a1	;;;	5	6	6	6	4	4	4	2	2	1	3	4	4	4	4	4	2	2	1	3	4	4	4	4	4	2	2	1	3	4	4	11.2	11.2	11.2	58.804	589	589;1225;1453;325;114	0	61.299	By MS/MS	By MS/MS	By MS/MS
B2RTL6;Q9Z1T2;E9PWF0;Q05895	B2RTL6;Q9Z1T2	5;5;1;1	4;4;1;1	4;4;1;1	Thrombospondin-4	Thbs4	;	4	5	4	4	3	4	4	4	3	1	4	5	5	2	3	3	3	2	0	3	4	4	2	3	3	3	2	0	3	4	4	6.3	5.3	5.3	106.37	963	963;963;919;956	0	35.275	By MS/MS	By MS/MS	By MS/MS
Q8VI54;Q9R0G6;A1A557;A2VCQ0	Q8VI54;Q9R0G6;A1A557;A2VCQ0	10;10;9;9	3;3;2;2	3;3;2;2	Cartilage oligomeric matrix protein	Comp	;;;	4	10	3	3	5	8	8	7	5	5	6	7	7	2	2	2	2	1	2	1	2	2	2	2	2	2	1	2	1	2	2	16.8	5	5	82.175	755	755;755;755;759	0	42.101	By MS/MS	By MS/MS	By MS/MS
G3UY13;Q3UEL3;E9Q6I2;Q3V2X3;Q3UVZ1;Q61730-2;Q61730;Q61730-3	G3UY13;Q3UEL3;E9Q6I2;Q3V2X3;Q3UVZ1;Q61730-2;Q61730;Q61730-3	2;2;2;2;2;2;2;2	2;2;2;2;2;2;2;2	2;2;2;2;2;2;2;2	Interleukin-1 receptor accessory protein	Il1rap	;;;;;;;	8	2	2	2	1	1	1	1	2	1	1	1	1	1	1	1	1	2	1	1	1	1	1	1	1	1	2	1	1	1	1	5.5	5.5	5.5	39.881	346	346;360;640;685;685;360;570;685	0	2.238	By MS/MS	By MS/MS	By MS/MS
Q91VL4;Q3TP88;Q3TUE2;Q3TX57;Q3TU64;Q01149	Q91VL4;Q3TP88;Q3TUE2;Q3TX57;Q3TU64;Q01149	4;4;4;4;4;4	4;4;4;4;4;4	4;4;4;4;4;4	Collagen alpha-2(I) chain	Col1a2	;;;;;	6	4	4	4	3	3	3	1	2	2	2	1	1	3	3	3	1	2	2	2	1	1	3	3	3	1	2	2	2	1	1	9.5	9.5	9.5	56.662	566	566;959;1241;1372;1372;1372	0	20.89	By MS/MS	By MS/MS	By MS/MS
Q04857;B0LAD9;Q99LW4;Q8C6Y0	Q04857;B0LAD9;Q99LW4	3;2;2;1	3;2;2;1	3;2;2;1	Collagen alpha-1(VI) chain	Col6a1	;;	4	3	3	3	1	2	2	2	1	1	1	2	2	1	2	2	2	1	1	1	2	2	1	2	2	2	1	1	1	2	2	3.5	3.5	3.5	108.49	1025	1025;165;406;266	0	9.6509	By MS/MS	By MS/MS	By MS/MS
Q4KL81;P63260;Q3TSB7;Q3UD81;G3UYG0;B1ATY1	Q4KL81;P63260;Q3TSB7;Q3UD81	22;22;21;12;9;9	1;1;1;1;1;1	0;0;0;0;0;0	Actin, cytoplasmic 2;Actin, cytoplasmic 2, N-terminally processed	Actg1	;;;	6	22	1	0	12	13	11	14	20	10	19	18	16	1	1	1	1	1	0	1	1	1	0	0	0	0	0	0	0	0	0	66.1	4.5	0	41.792	375	375;375;375;235;132;153	0	8.1774	By MS/MS	By MS/MS	By MS/MS
G3UYM8;Q80U26;F6VR53;D3YUF3;D3YUF4;G3UXP9;E9Q863;Q003U3;E9PY13;E9PY12;Q3UHQ9;G3UX72;E9PXE1;E9QPM7;Q6PDM6;E9PXE2;Q64096;Q8C7Z1	G3UYM8;Q80U26;F6VR53;D3YUF3;D3YUF4;G3UXP9;E9Q863;Q003U3;E9PY13;E9PY12;Q3UHQ9;G3UX72;E9PXE1;E9QPM7;Q6PDM6;E9PXE2;Q64096;Q8C7Z1	2;2;2;2;2;2;2;2;2;2;2;2;2;2;2;2;2;1	2;2;2;2;2;2;2;2;2;2;2;2;2;2;2;2;2;1	2;2;2;2;2;2;2;2;2;2;2;2;2;2;2;2;2;1	Guanine nucleotide exchange factor DBS	Mcf2l	;;;;;;;;;;;;;;;;;	18	2	2	2	0	1	1	0	2	1	1	2	2	0	1	1	0	2	1	1	2	2	0	1	1	0	2	1	1	2	2	3	3	3	86.56	757	757;806;807;866;1046;1059;1067;1097;1097;1101;1118;1118;1125;1149;1166;1175;1149;477	0	3.5807		By MS/MS	By MS/MS
P26339;Q3UN28	P26339;Q3UN28	20;13	20;13	20;13	Chromogranin-A;Pancreastatin;Beta-granin;WE-14;Catestatin;GE-25;Serpinin-RRG;Serpinin;p-Glu serpinin precursor	Chga	;	2	20	20	20	11	9	7	13	1	14	5	15	15	11	9	7	13	1	14	5	15	15	11	9	7	13	1	14	5	15	15	49.9	49.9	49.9	51.789	463	463;314	0	323.31	By MS/MS	By MS/MS	By MS/MS
Q545I7;P01325	Q545I7;P01325	5;5	4;4	4;4	Insulin-1;Insulin-1 B chain;Insulin-1 A chain	Ins1	;	2	5	4	4	3	2	2	3	1	2	2	4	3	2	1	1	2	1	1	2	4	2	2	1	1	2	1	1	2	4	2	70.4	50.9	50.9	12.16	108	108;108	0	41.497	By MS/MS	By MS/MS	By MS/MS
Q543R4;Q00493	Q543R4;Q00493	19;19	19;19	19;19	Carboxypeptidase E	Cpe	;	2	19	19	19	12	4	5	12	1	15	4	15	13	12	4	5	12	1	15	4	15	13	12	4	5	12	1	15	4	15	13	46	46	46	53.255	476	476;476	0	121.39	By MS/MS	By MS/MS	By MS/MS
P47867;P47867-2	P47867;P47867-2	15;14	15;14	15;14	Secretogranin-3	Scg3	;	2	15	15	15	9	3	4	9	1	14	2	6	3	9	3	4	9	1	14	2	6	3	9	3	4	9	1	14	2	6	3	42.7	42.7	42.7	53.326	471	471;466	0	82.795	By MS/MS	By MS/MS	By MS/MS
Q71LX8;P11499;Q80YC2;Q811H6;E9Q3D6;D3Z1R1;E9PX27;E9Q0C3	Q71LX8;P11499	15;15;5;5;4;3;3;2	13;13;5;5;4;1;1;2	8;8;3;3;3;0;0;2	Heat shock protein HSP 90-beta	Hsp90ab1	;	8	15	13	8	12	1	5	4	3	11	3	9	8	11	1	4	4	3	10	3	7	7	7	0	2	2	1	6	1	4	4	25.8	23.9	16	83.28	724	724;724;363;378;189;76;112;161	0	60.107	By MS/MS	By MS/MS	By MS/MS
Q3TT51;P12961	Q3TT51;P12961	4;4	4;4	4;4	Neuroendocrine protein 7B2;N-terminal peptide;C-terminal peptide	Scg5	;	2	4	4	4	3	2	1	3	1	4	1	3	3	3	2	1	3	1	4	1	3	3	3	2	1	3	1	4	1	3	3	30.7	30.7	30.7	23.866	212	212;212	0	46.933	By MS/MS	By MS/MS	By MS/MS
Q5FW97;P17182;Q6PHC1;Q8CF78;B0QZL1;B1ARR7	Q5FW97;P17182;Q6PHC1;Q8CF78;B0QZL1	15;15;11;9;8;6	15;15;11;9;8;6	13;13;11;7;6;4	Alpha-enolase;Enolase	EG433182;Eno1	;;;;	6	15	15	13	9	5	2	3	3	8	4	9	9	9	5	2	3	3	8	4	9	9	7	4	2	2	2	6	3	8	8	48.2	48.2	41	47.14	434	434;434;366;321;221;119	0	49.776	By MS/MS	By MS/MS	By MS/MS
A0JLV3;B2RVD5;B2RTK3;Q8CBB6;Q921L4;Q8CGP2;Q8CGP1;Q6ZWY9;Q64525;Q64478;Q64475;P10854;P10853;Q8CGP2-2;A0JNS9;Q9D2U9;Q8CGP0;Q64524;P70696;Q8VEE3;G3X9D5	A0JLV3;B2RVD5;B2RTK3;Q8CBB6;Q921L4;Q8CGP2;Q8CGP1;Q6ZWY9;Q64525;Q64478;Q64475;P10854;P10853;Q8CGP2-2;A0JNS9;Q9D2U9;Q8CGP0;Q64524;P70696;Q8VEE3;G3X9D5	4;4;4;4;4;4;4;4;4;4;4;4;4;4;3;3;3;3;3;2;2	4;4;4;4;4;4;4;4;4;4;4;4;4;4;3;3;3;3;3;2;2	4;4;4;4;4;4;4;4;4;4;4;4;4;4;3;3;3;3;3;2;2	Histone H2B;Histone H2B type 1-P;Histone H2B type 1-K;Histone H2B type 1-C/E/G;Histone H2B type 2-B;Histone H2B type 1-H;Histone H2B type 1-B;Histone H2B type 1-M;Histone H2B type 1-F/J/L;Histone H2B type 3-A;Histone H2B type 3-B;Histone H2B type 2-E;Histone H2B type 1-A	Hist1h2bj;Hist1h2bk;Hist1h2bm;Hist1h2br;LOC665622;Hist1h2bp;Hist1h2bc;Hist2h2bb;Hist1h2bh;Hist1h2bb;Hist1h2bf;Hist1h2ba;Hist3h2ba;Hist3h2bb;Hist2h2be	;;;;;;;;;;;;;;;;;;;;	21	4	4	4	3	3	2	2	2	3	2	4	3	3	3	2	2	2	3	2	4	3	3	3	2	2	2	3	2	4	3	34.1	34.1	34.1	13.579	123	123;126;126;134;135;126;126;126;126;126;126;126;126;138;127;126;126;126;127;120;120	0	10.048	By MS/MS	By MS/MS	By MS/MS
F8WIX8;A0A0N4SV66;A0AUV1;A3KPD0;Q8CGP4;Q149V4;B2RWH3;B2RVF0;A2AB79;Q8CGP6;Q8R1M2;Q64523;Q8CGP7;Q8CGP5;Q8BFU2;Q6GSS7;P22752;B2RVP5;Q3THW5;P0C0S6;P27661;Q61668;G3UWL7;Q8R029;Q3TFU6;Q3UA95;Q64522	F8WIX8;A0A0N4SV66;A0AUV1;A3KPD0;Q8CGP4;Q149V4;B2RWH3;B2RVF0;A2AB79;Q8CGP6;Q8R1M2;Q64523;Q8CGP7;Q8CGP5;Q8BFU2;Q6GSS7;P22752;B2RVP5;Q3THW5;P0C0S6;P27661	3;3;3;3;3;3;3;3;3;3;3;3;3;3;3;3;3;2;2;2;2;1;1;1;1;1;1	3;3;3;3;3;3;3;3;3;3;3;3;3;3;3;3;3;2;2;2;2;1;1;1;1;1;1	3;3;3;3;3;3;3;3;3;3;3;3;3;3;3;3;3;2;2;2;2;1;1;1;1;1;1	Histone H2A;Histone H2A type 1-H;Histone H2A.J;Histone H2A type 2-C;Histone H2A type 1-K;Histone H2A type 1-F;Histone H2A type 3;Histone H2A type 2-A;Histone H2A type 1;Histone H2A.V;Histone H2A.Z;Histone H2AX	Hist1h2al;Hist1h2ah;Hist1h2aa;Hist2h2ac;Hist2h2aa1;Hist1h2ad;Hist3h2a;H2afj;Hist1h2ak;Hist1h2af;Hist1h2ab;H2afv;H2afz;H2afx	;;;;;;;;;;;;;;;;;;;;	27	3	3	3	2	1	1	2	1	3	1	2	1	2	1	1	2	1	3	1	2	1	2	1	1	2	1	3	1	2	1	28	28	28	13.607	125	125;126;127;128;129;129;130;130;130;128;129;129;130;130;130;130;130;128;128;128;143;37;87;90;90;105;130	0	6.2244	By MS/MS	By MS/MS	By MS/MS
Q8C2N4;Q7TSG6;Q05CE6;Q05DU4;Q3TZQ2;Q4KML7;Q3UXR4;Q3UL48;Q3TCP5;Q3UJJ8;Q3TH46;Q3U111;P26041;P26043;P26040;Q8CBU4	Q8C2N4;Q7TSG6;Q05CE6;Q05DU4;Q3TZQ2;Q4KML7;Q3UXR4;Q3UL48;Q3TCP5;Q3UJJ8;Q3TH46;Q3U111;P26041;P26043;P26040;Q8CBU4	2;2;2;2;2;2;2;2;2;2;2;2;2;2;2;1	2;2;2;2;2;2;2;2;2;2;2;2;2;2;2;1	2;2;2;2;2;2;2;2;2;2;2;2;2;2;2;1	Moesin;Radixin;Ezrin	Rdx;Msn;Ezr	;;;;;;;;;;;;;;;	16	2	2	2	0	0	0	0	1	2	1	1	1	0	0	0	0	1	2	1	1	1	0	0	0	0	1	2	1	1	1	5.1	5.1	5.1	39.601	333	333;389;413;439;577;586;586;586;586;652;657;662;577;583;586;421	0.008016	1.1796
Q1A602;Q3ULT2;Q3UDJ7;P57780;A1BN54;Q7TPR4;E9Q2W9;Q8BP35;D3Z0L8;O88990;D3Z761;Q99LJ3;Q8K3Q4;Q5FW75;Q9JI91;Q61063;Q61064	Q1A602;Q3ULT2;Q3UDJ7;P57780;A1BN54;Q7TPR4;E9Q2W9	10;10;10;10;7;7;6;3;3;3;2;2;2;2;2;1;1	10;10;10;10;7;7;6;3;3;3;2;2;2;2;2;1;1	10;10;10;10;7;7;6;3;3;3;2;2;2;2;2;1;1	Alpha-actinin-4;Alpha-actinin-1	Actn4;Actn1	;;;;;;	17	10	10	10	7	0	1	1	2	7	3	3	1	7	0	1	1	2	7	3	3	1	7	0	1	1	2	7	3	3	1	13.5	13.5	13.5	104.91	911	911;912;912;912;887;892;518;202;206;900;133;400;894;894;894;72;109	0	23.688	By MS/MS		By matching
P68372;Q9D6F9;Q9CVR0;Q9DCR1;Q9CRT0;Q3U9U3;Q3UMM1;Q922F4;Q9CUN8	P68372;Q9D6F9;Q9CVR0;Q9DCR1	13;10;9;8;6;6;6;6;5	13;10;9;8;6;6;6;6;5	3;2;2;0;0;0;0;0;0	Tubulin beta-4B chain;Tubulin beta-4A chain	Tubb4b;Tubb4a	;;;	9	13	13	3	8	3	4	2	4	6	2	9	9	8	3	4	2	4	6	2	9	9	2	1	1	1	0	2	0	1	2	45.6	45.6	12.1	49.83	445	445;444;291;299;235;375;447;447;211	0	107.26	By MS/MS	By matching	By MS/MS
Q2T9H5;Q9QZ25	Q2T9H5;Q9QZ25	1;1	1;1	1;1	Vascular non-inflammatory molecule 3	Vnn3	;	2	1	1	1	1	1	1	1	1	1	1	1	1	1	1	1	1	1	1	1	1	1	1	1	1	1	1	1	1	1	1	2.4	2.4	2.4	56.229	500	500;500	0	4.3077	By matching	By MS/MS	By MS/MS
Q3UAF7;Q3UAF6;Q3U5R4;B2RRX1;P60710;Q3UAA9;Q3UA89;Q3U939;Q3U804;Q3UGS0;Q61276;Q3TIJ9;Q3UCF8;E9Q1F2;E9Q5F4;G3UZ07;Q61272;A1E281;Q99NC5;E9Q606;O89054;F8WGM8;E9Q2D1;Q6IWE2;F6WX90;Q7M0E4;Q8CF71;V9GXQ2;A0A0U1RQ96;Q6GQT3;E9Q3M9	Q3UAF7;Q3UAF6;Q3U5R4;B2RRX1;P60710;Q3UAA9;Q3UA89;Q3U939;Q3U804;Q3UGS0;Q61276;Q3TIJ9;Q3UCF8;E9Q1F2;E9Q5F4;G3UZ07	22;22;22;22;22;21;21;20;20;20;19;19;18;17;15;11;9;8;8;8;6;5;5;4;3;2;2;2;2;1;1	22;22;22;22;22;21;21;20;20;20;19;19;18;17;15;11;9;8;8;8;6;5;5;4;3;2;2;2;2;1;1	0;0;0;0;0;0;0;0;0;0;0;0;0;0;0;0;0;0;0;0;0;0;0;0;0;0;0;0;0;0;0	Actin, cytoplasmic 1;Actin, cytoplasmic 1, N-terminally processed	Actb;Actg1	;;;;;;;;;;;;;;;	31	22	22	0	12	13	11	14	20	11	19	18	16	12	13	11	14	20	11	19	18	16	0	0	0	0	0	0	0	0	0	66.1	66.1	0	41.75	375	375;375;375;375;375;375;375;374;374;375;375;375;374;295;265;268;336;121;134;150;136;105;108;77;43;36;109;156;195;835;1175	0	287.69	By MS/MS	By MS/MS	By MS/MS
Q3U9G2;Q3TWF2;P20029;Q9DC41;Q3TKF8;Q3TI47;Q3U7T8;Q3U6V3;Q3UEM8;Q3TUS2	Q3U9G2;Q3TWF2;P20029;Q9DC41;Q3TKF8;Q3TI47;Q3U7T8;Q3U6V3;Q3UEM8	25;25;25;24;24;24;23;22;20;8	25;25;25;24;24;24;23;22;20;8	23;23;23;22;22;22;21;20;18;8	78 kDa glucose-regulated protein	Hspa5	;;;;;;;;	10	25	25	23	21	8	11	13	7	19	2	19	17	21	8	11	13	7	19	2	19	17	19	6	9	11	7	17	2	17	15	47.6	47.6	46	72.405	655	655;655;655;655;655;655;619;655;520;236	0	146.84	By MS/MS	By MS/MS	By MS/MS
S4R257;D2KHZ9;A0A0A0MQF6;P16858;S4R1W1;Q3TUZ9;D3YYI5;W8QM43;Q6IWE3;Q4VBD1;Q8CEV2;Q3V2I5;A0A0R4J0X7;S4R2G5;Q64467;S4R1W8;V9GXA7;V9GXK0;V9GX06;Q8BJ40	S4R257;D2KHZ9;A0A0A0MQF6;P16858;S4R1W1;Q3TUZ9;D3YYI5	11;11;11;11;10;6;6;2;2;2;2;2;2;2;2;1;1;1;1;1	11;11;11;11;10;6;6;2;2;2;2;2;2;2;2;1;1;1;1;1	11;11;11;11;10;6;6;2;2;2;2;2;2;2;2;1;1;1;1;1	Glyceraldehyde-3-phosphate dehydrogenase	Gapdh;GAPDH;Gm3839;Gm10481;Gm7293	;;;;;;	20	11	11	11	8	4	4	2	3	6	4	5	7	8	4	4	2	3	6	4	5	7	8	4	4	2	3	6	4	5	7	58.2	58.2	58.2	29.939	280	280;333;359;333;333;144;336;77;96;136;156;236;438;440;440;55;121;151;183;209	0	62.219	By MS/MS	By MS/MS	By MS/MS
Q3UBP6;Q3UBQ4	Q3UBP6;Q3UBQ4	21;19	1;1	0;0		Actb	;	2	21	1	0	11	12	10	13	19	10	18	17	15	1	1	1	1	1	1	1	1	1	0	0	0	0	0	0	0	0	0	62.7	4.3	0	41.768	375	375;374	0	37.093	By MS/MS	By MS/MS	By MS/MS
Q58E64;Q3UA81;P10126;Q3TII3;Q3UZQ3;D3YZ68;P62631;D3Z3I8;Q4FZE5	Q58E64;Q3UA81;P10126;Q3TII3;Q3UZQ3	11;11;11;10;10;5;5;4;3	11;11;11;10;10;5;5;4;3	11;11;11;10;10;5;5;4;3	Elongation factor 1-alpha;Elongation factor 1-alpha 1	Eef1a1	;;;;	9	11	11	11	8	3	3	3	4	7	3	5	8	8	3	3	3	4	7	3	5	8	8	3	3	3	4	7	3	5	8	31.4	31.4	31.4	50.113	462	462;462;462;462;462;249;463;186;108	0	91.696	By MS/MS	By MS/MS	By MS/MS
P05213;Q99KA2;O89052;Q3UX10	P05213;Q99KA2	17;13;5;1	17;13;5;1	0;0;0;0	Tubulin alpha-1B chain	Tuba1b	;	4	17	17	0	13	6	3	7	4	10	6	8	15	13	6	3	7	4	10	6	8	15	0	0	0	0	0	0	0	0	0	50.3	50.3	0	50.151	451	451;347;99;446	0	76.344	By MS/MS	By MS/MS	By MS/MS
Q5EEX1;P01326;D0EY27;E0CXX7;D3YWU5;D3Z596;D3Z595	Q5EEX1;P01326;D0EY27;E0CXX7	6;6;5;3;2;2;2	6;6;5;3;2;2;2	5;5;5;2;2;2;2	Insulin-2;Insulin-2 B chain;Insulin-2 A chain	Ins2	;;;	7	6	6	5	3	1	1	5	1	4	5	4	5	3	1	1	5	1	4	5	4	5	2	0	0	4	1	3	5	4	4	75.5	75.5	56.4	12.364	110	110;110;109;98;71;79;106	0	248.03	By MS/MS	By MS/MS	By MS/MS
Q5SS40;P62259;Q8BPH1;D6REF3;F6WA09;Q3V453	Q5SS40;P62259;Q8BPH1;D6REF3;F6WA09	12;12;10;6;6;3	12;12;10;6;6;3	10;10;8;5;5;2	14-3-3 protein epsilon	Ywhae	;;;;	6	12	12	10	8	3	3	4	4	6	3	6	8	8	3	3	4	4	6	3	6	8	6	2	2	2	3	4	2	5	7	47.1	47.1	40	29.174	255	255;255;255;130;154;91	0	48.764	By MS/MS	By MS/MS	By MS/MS
D3YW52;Q61838	D3YW52;Q61838	4;4	3;3	3;3	Alpha-2-macroglobulin;Alpha-2-macroglobulin 165 kDa subunit;Alpha-2-macroglobulin 35 kDa subunit	Pzp;A2m	;	2	4	3	3	3	3	3	3	3	3	3	3	3	2	2	2	2	2	2	2	2	2	2	2	2	2	2	2	2	2	2	2.3	1.8	1.8	167.28	1507	1507;1495	0	6.1637	By MS/MS	By MS/MS	By MS/MS
P00688;Q61299	P00688	25;5	25;5	1;1	Pancreatic alpha-amylase	Amy2		2	25	25	1	17	21	16	19	21	20	10	11	9	17	21	16	19	21	20	10	11	9	1	1	1	1	1	1	0	1	1	61.2	61.2	2.6	57.318	508	508;179	0	323.31	By MS/MS	By MS/MS	By MS/MS
Q5SVY2;Q3UAJ1;Q3TE63;P17742;Q9CZK9;F8VPN3;V9GXC1;V9GX31	Q5SVY2;Q3UAJ1;Q3TE63;P17742;Q9CZK9	9;9;9;9;7;3;2;2	9;9;9;9;7;3;2;2	9;9;9;9;7;3;2;2	Peptidyl-prolyl cis-trans isomerase;Peptidyl-prolyl cis-trans isomerase A;Peptidyl-prolyl cis-trans isomerase A, N-terminally processed	Ppia	;;;;	8	9	9	9	5	4	4	5	5	6	4	8	6	5	4	4	5	5	6	4	8	6	5	4	4	5	5	6	4	8	6	61	61	61	17.971	164	164;164;164;164;167;147;77;77	0	47.499	By MS/MS	By MS/MS	By MS/MS
Q9QZ83	Q9QZ83	19	2	2		Actg1		1	19	2	2	10	11	9	11	19	8	18	15	13	1	1	1	1	2	1	2	2	2	1	1	1	1	2	1	2	2	2	57	5.6	5.6	43.6	393	393	0	53.878	By MS/MS	By MS/MS	By MS/MS
Q3UDR2;Q3URP6;Q3U738;Q3TWE3;Q3TIM0;Q3THC3;Q3TF72;P09103;Q3TGS0;Q3UBY9;Q3UJA8;Q3UA23;Q3TT76;Q3TIQ5;E9Q8G8	Q3UDR2;Q3URP6;Q3U738;Q3TWE3;Q3TIM0;Q3THC3;Q3TF72;P09103;Q3TGS0;Q3UBY9;Q3UJA8;Q3UA23;Q3TT76	17;17;17;17;17;17;17;17;16;16;16;16;11;6;6	17;17;17;17;17;17;17;17;16;16;16;16;11;6;6	17;17;17;17;17;17;17;17;16;16;16;16;11;6;6	Protein disulfide-isomerase	P4hb	;;;;;;;;;;;;	15	17	17	17	16	6	7	7	7	16	2	10	9	16	6	7	7	7	16	2	10	9	16	6	7	7	7	16	2	10	9	38.2	38.2	38.2	56.6	505	505;509;509;509;509;509;509;509;509;509;509;509;385;144;165	0	98.802	By MS/MS	By MS/MS	By MS/MS
P63101;D3YXN6;Q3UA58;Q8BWN0;D3YXF4	P63101	11;4;4;4;2	9;3;3;3;2	8;3;2;3;2	14-3-3 protein zeta/delta	Ywhaz		5	11	9	8	8	6	5	7	4	9	2	7	7	6	5	4	5	3	7	1	6	6	5	4	3	4	2	6	1	5	5	53.5	46.1	42.4	27.771	245	245;88;112;117;45	0	80.143	By MS/MS	By MS/MS	By MS/MS
Q9CR35	Q9CR35	10	10	10	Chymotrypsinogen B;Chymotrypsin B chain A;Chymotrypsin B chain B;Chymotrypsin B chain C	Ctrb1		1	10	10	10	6	8	6	8	8	8	6	3	6	6	8	6	8	8	8	6	3	6	6	8	6	8	8	8	6	3	6	68.1	68.1	68.1	27.822	263	263	0	181.68	By MS/MS	By MS/MS	By MS/MS
P17751;H7BXC3	P17751;H7BXC3	9;8	9;8	9;8	Triosephosphate isomerase	Tpi1	;	2	9	9	9	7	2	4	2	3	7	2	5	4	7	2	4	2	3	7	2	5	4	7	2	4	2	3	7	2	5	4	36.8	36.8	36.8	32.191	299	299;167	0	26.035	By MS/MS	By MS/MS	By MS/MS
Q91X79	Q91X79	8	8	7	Chymotrypsin-like elastase family member 1	Cela1		1	8	8	7	6	5	5	6	8	6	3	2	4	6	5	5	6	8	6	3	2	4	6	5	5	6	7	6	2	2	4	50	50	47.4	28.9	266	266	0	140.18	By MS/MS	By MS/MS	By MS/MS
Q3UV17	Q3UV17	9;4	1;0	1;0	Keratin, type II cytoskeletal 2 oral	Krt76		2	9	1	1	7	6	6	7	4	9	5	4	4	1	1	1	1	1	1	1	1	1	1	1	1	1	1	1	1	1	1	11.4	1.5	1.5	62.844	594	594;529	0	2.2063	By MS/MS	By MS/MS	By MS/MS
P16125;Q5M8R7;D3Z7F0;A0A0N4SVV8;D3YVR7;D3YZE4;Q64483;Q548Z6;P00342	P16125;Q5M8R7;D3Z7F0	6;3;3;2;1;1;1;1;1	6;3;3;2;1;1;1;1;1	5;3;2;1;0;0;0;0;0	L-lactate dehydrogenase B chain;L-lactate dehydrogenase	Ldhb	;;	9	6	6	5	1	2	1	1	3	2	3	3	4	1	2	1	1	3	2	3	3	4	0	1	0	1	3	1	3	3	3	22.5	22.5	18.9	36.572	334	334;101;198;193;235;237;332;332;332	0	11.82	By MS/MS	By MS/MS	By MS/MS
Q792Z1	Q792Z1	6	2	2		Try10		1	6	2	2	5	4	4	5	3	5	1	2	3	2	1	1	2	1	2	1	2	2	2	1	1	2	1	2	1	2	2	42.3	15.4	15.4	26.221	246	246	0	10.054	By MS/MS	By MS/MS	By MS/MS
D3YXH9;E9QL22;Q3U1C6-2;Q3U1C6	D3YXH9;E9QL22;Q3U1C6-2;Q3U1C6	1;1;1;1	1;1;1;1	1;1;1;1	Putative deoxyribonuclease TATDN3	Tatdn3	;;;	4	1	1	1	1	1	1	1	1	1	1	1	1	1	1	1	1	1	1	1	1	1	1	1	1	1	1	1	1	1	1	5.8	5.8	5.8	32.279	293	293;294;290;294	0.0097087	1.0518	By MS/MS	By MS/MS	By MS/MS
F6W4D3;D3YY36;Q8VC96;Q9DBD0	F6W4D3;D3YY36;Q8VC96;Q9DBD0	2;2;2;2	1;1;1;1	1;1;1;1	Inhibitor of carbonic anhydrase	1300017J02Rik;Ica	;;;	4	2	1	1	1	2	1	2	2	1	1	2	2	1	1	1	1	1	1	1	1	1	1	1	1	1	1	1	1	1	1	9.9	5.4	5.4	26.65	242	242;622;700;700	0	13.41	By MS/MS	By MS/MS	By MS/MS
Q3U7Z6;Q9DBJ1;Q6NWV5;Q5NCI4;O70250	Q3U7Z6;Q9DBJ1;Q6NWV5	7;7;6;3;3	7;7;6;3;3	7;7;6;3;3	Phosphoglycerate mutase 1	Pgam1	;;	5	7	7	7	4	1	0	2	3	2	2	4	4	4	1	0	2	3	2	2	4	4	4	1	0	2	3	2	2	4	4	39.4	39.4	39.4	28.832	254	254;254;197;253;253	0	19.604	By MS/MS	By MS/MS
Q9WVA4;A0A0A6YXG6	Q9WVA4	3;1	3;1	3;1	Transgelin-2	Tagln2		2	3	3	3	2	1	1	0	2	2	2	3	2	2	1	1	0	2	2	2	3	2	2	1	1	0	2	2	2	3	2	18.1	18.1	18.1	22.395	199	199;90	0	29.228	By MS/MS	By matching	By matching
Q8BPI7;Q5M9P0;Q3U5U5;Q3U4D1;Q3TF14;P50247	Q8BPI7;Q5M9P0;Q3U5U5;Q3U4D1;Q3TF14;P50247	3;3;3;3;3;3	3;3;3;3;3;3	3;3;3;3;3;3	Adenosylhomocysteinase	Ahcy	;;;;;	6	3	3	3	3	1	1	0	1	2	1	1	1	3	1	1	0	1	2	1	1	1	3	1	1	0	1	2	1	1	1	13.9	13.9	13.9	36.04	324	324;432;432;432;432;432	0	8.3352	By MS/MS	By MS/MS	By matching
Q5FWB7;A6ZI44;P05064;Q6NY00;D3YWI1;Q9CPQ9;A6ZI46;A0A0U1RPN8;D3YV98;A0A0U1RPT5;D3Z510;A6ZI47;P05063;Q3UER1;Q3TJ66;Q91Y97	Q5FWB7;A6ZI44;P05064;Q6NY00;D3YWI1;Q9CPQ9;A6ZI46;A0A0U1RPN8	14;14;14;11;10;9;9;7;6;6;5;4;3;1;1;1	14;14;14;11;10;9;9;7;6;6;5;4;3;1;1;1	14;14;14;11;10;9;9;7;6;6;5;4;3;1;1;1	Fructose-bisphosphate aldolase;Fructose-bisphosphate aldolase A	Aldoa;Aldoart1	;;;;;;;	16	14	14	14	10	2	4	0	2	7	1	8	10	10	2	4	0	2	7	1	8	10	10	2	4	0	2	7	1	8	10	52.5	52.5	52.5	39.355	364	364;418;364;364;237;364;419;190;193;209;131;364;363;364;364;364	0	69.068	By MS/MS	By matching	By MS/MS
Q5M9K1;P07309;Q9D6A4	Q5M9K1;P07309;Q9D6A4	4;4;3	4;4;3	4;4;3	Transthyretin	Ttr	;;	3	4	4	4	3	1	2	2	0	3	1	2	3	3	1	2	2	0	3	1	2	3	3	1	2	2	0	3	1	2	3	39.5	39.5	39.5	15.776	147	147;147;147	0	68.216	By MS/MS	By matching	By matching
P55095;A2AS86	P55095;A2AS86	7;6	7;6	7;6	Glucagon;Glicentin;Glicentin-related polypeptide;Oxyntomodulin;Glucagon;Glucagon-like peptide 1;Glucagon-like peptide 1(7-37);Glucagon-like peptide 1(7-36);Glucagon-like peptide 2	Gcg	;	2	7	7	7	4	3	2	5	0	5	3	5	6	4	3	2	5	0	5	3	5	6	4	3	2	5	0	5	3	5	6	47.2	47.2	47.2	20.906	180	180;173	0	267.68	By MS/MS	By MS/MS	By MS/MS
Q3UZV3;Q547J8;Q3TYM6;Q3TT48;P21661	Q3UZV3;Q547J8;Q3TYM6;Q3TT48;P21661	9;9;9;9;9	9;9;9;9;9	9;9;9;9;9	Neuroendocrine convertase 2	Pcsk2	;;;;	5	9	9	9	5	3	3	5	0	5	4	8	6	5	3	3	5	0	5	4	8	6	5	3	3	5	0	5	4	8	6	22.6	22.6	22.6	68.911	619	619;637;637;736;637	0	97.286	By MS/MS	By MS/MS	By MS/MS
Q03517;Q4W8U9	Q03517;Q4W8U9	17;16	17;16	17;16	Secretogranin-2;Secretoneurin;Manserin	Scg2	;	2	17	17	17	10	3	5	6	0	13	2	6	8	10	3	5	6	0	13	2	6	8	10	3	5	6	0	13	2	6	8	33.2	33.2	33.2	70.643	617	617;577	0	53.58	By MS/MS	By MS/MS	By MS/MS
Q32MU0;P63239;Q8BRQ2	Q32MU0;P63239	8;8;3	8;8;3	8;8;3	Neuroendocrine convertase 1	Pcsk1	;	3	8	8	8	2	0	0	2	0	3	3	7	2	2	0	0	2	0	3	3	7	2	2	0	0	2	0	3	3	7	2	16.1	16.1	16.1	84.173	753	753;753;247	0	28.811	By MS/MS
Q3UDU4;Q564E2;Q3TI99;Q3TCI7;G5E8N5;P06151;D3Z736;D3YZQ9;Q99K20;Q3THB4;Q6NXW3;Q3UIC3	Q3UDU4;Q564E2;Q3TI99;Q3TCI7;G5E8N5;P06151;D3Z736;D3YZQ9;Q99K20;Q3THB4	3;3;3;3;3;3;2;2;2;2;1;1	2;2;2;2;2;2;1;1;1;1;1;1	2;2;2;2;2;2;1;1;1;1;1;1	L-lactate dehydrogenase;L-lactate dehydrogenase A chain	Ldha	;;;;;;;;;	12	3	2	2	3	1	1	0	0	3	1	1	2	2	0	0	0	0	2	1	1	1	2	0	0	0	0	2	1	1	1	9.4	5.8	5.8	36.265	330	330;332;332;332;361;332;237;273;315;332;104;169	0	2.4229	By MS/MS	By matching	By matching
Q6PGF7	Q6PGF7	1	1	1	Exocyst complex component 8	Exoc8		1	1	1	1	1	0	1	0	0	1	1	1	1	1	0	1	0	0	1	1	1	1	1	0	1	0	0	1	1	1	1	1.4	1.4	1.4	81.034	716	716	0.0061602	1.2341	By MS/MS		By MS/MS
H7BWY6;Q00724;Q3TF08	H7BWY6;Q00724;Q3TF08	2;2;1	2;2;1	2;2;1	Retinol-binding protein 4	Rbp4	;;	3	2	2	2	1	2	1	1	1	0	1	1	1	1	2	1	1	1	0	1	1	1	1	2	1	1	1	0	1	1	1	11.8	11.8	11.8	28.405	245	245;201;174	0	4.4824	By MS/MS	By MS/MS	By MS/MS
A0A0A6YVT7;A0A0A6YWE6;Q3UHD7;Q61137-2;Q61137	A0A0A6YVT7;A0A0A6YWE6;Q3UHD7;Q61137-2;Q61137	1;1;1;1;1	1;1;1;1;1	1;1;1;1;1	Astrotactin-1	Astn1	;;;;	5	1	1	1	0	0	0	0	1	0	1	1	1	0	0	0	0	1	0	1	1	1	0	0	0	0	1	0	1	1	1	5.1	5.1	5.1	26.406	236	236;1172;1294;1294;1302	1	-2
Q3TRK2	Q3TRK2	1	1	1		Tnrc6b		1	1	1	1	0	0	0	0	1	0	1	1	1	0	0	0	0	1	0	1	1	1	0	0	0	0	1	0	1	1	1	2.6	2.6	2.6	78.107	731	731	1	-2
Q9Z1R3	Q9Z1R3	1	1	1	Apolipoprotein M	Apom		1	1	1	1	1	1	1	1	1	0	1	1	1	1	1	1	1	1	0	1	1	1	1	1	1	1	1	0	1	1	1	7.9	7.9	7.9	21.273	190	190	0	12.343	By matching	By MS/MS	By MS/MS
Q64727;Q3TEB0	Q64727	16;1	16;1	16;1	Vinculin	Vcl		2	16	16	16	2	4	2	2	9	0	9	5	4	2	4	2	2	9	0	9	5	4	2	4	2	2	9	0	9	5	4	23.7	23.7	23.7	116.72	1066	1066;379	0	100.86	By MS/MS	By MS/MS	By MS/MS
Q4ZJN6;D3YZ61;Q9ES30	Q4ZJN6;D3YZ61;Q9ES30	1;1;1	1;1;1	1;1;1	Complement C1q tumor necrosis factor-related protein 3	C1qtnf3	;;	3	1	1	1	0	1	0	1	1	0	1	1	1	0	1	0	1	1	0	1	1	1	0	1	0	1	1	0	1	1	1	4.5	4.5	4.5	26.828	246	246;319;246	0	7.3113		By MS/MS
O35490	O35490	1	1	1	Betaine--homocysteine S-methyltransferase 1	Bhmt		1	1	1	1	0	1	0	1	1	0	1	1	1	0	1	0	1	1	0	1	1	1	0	1	0	1	1	0	1	1	1	3.9	3.9	3.9	45.02	407	407	0	3.4603		By MS/MS
P47880	P47880	1	1	1	Insulin-like growth factor-binding protein 6	Igfbp6		1	1	1	1	0	0	0	1	1	0	1	1	1	0	0	0	1	1	0	1	1	1	0	0	0	1	1	0	1	1	1	6.3	6.3	6.3	25.346	238	238	0	25.741
B2RU80	B2RU80	1	1	1	Receptor-type tyrosine-protein phosphatase beta	Ptprb		1	1	1	1	0	1	1	1	1	0	1	1	1	0	1	1	1	1	0	1	1	1	0	1	1	1	1	0	1	1	1	1.1	1.1	1.1	224.49	1998	1998	0.0061983	1.2476		By MS/MS	By matching
E9Q1Y3;E9Q414	E9Q1Y3;E9Q414	5;5	3;3	3;3	Apolipoprotein B-100;Apolipoprotein B-48	Apob	;	2	5	3	3	2	2	2	2	5	0	4	5	5	2	1	1	1	3	0	2	3	3	2	1	1	1	3	0	2	3	3	1.1	0.7	0.7	503.9	4456	4456;4505	0	10.668	By MS/MS	By MS/MS	By MS/MS
Q64374	Q64374	2	2	2	Regucalcin	Rgn		1	2	2	2	1	1	1	1	1	0	1	2	2	1	1	1	1	1	0	1	2	2	1	1	1	1	1	0	1	2	2	9.4	9.4	9.4	33.406	299	299	0	13.924	By MS/MS	By MS/MS	By MS/MS
B9EKB8;B7ZWC4;Q07113;Q8K0J1;Q8C2F9	B9EKB8;B7ZWC4;Q07113	3;3;3;1;1	3;3;3;1;1	3;3;3;1;1	Cation-independent mannose-6-phosphate receptor	Igf2r	;;	5	3	3	3	0	2	1	1	2	0	3	2	1	0	2	1	1	2	0	3	2	1	0	2	1	1	2	0	3	2	1	1.7	1.7	1.7	273.81	2483	2483;2483;2483;876;1282	0	19.976		By MS/MS	By MS/MS
Q9CX41;Q6KAN9;D3Z2X2	Q9CX41;Q6KAN9;D3Z2X2	1;1;1	1;1;1	1;1;1		Dnhd1;mFLJ00251	;;	3	1	1	1	0	1	0	1	1	0	1	1	1	0	1	0	1	1	0	1	1	1	0	1	0	1	1	0	1	1	1	6	6	6	33.141	285	285;1029;4750	1	-2		By MS/MS
A2A4I8;A2A4I9;O70423-2;Q812C9;O70423	A2A4I8;A2A4I9;O70423-2;Q812C9;O70423	2;2;2;2;2	2;2;2;2;2	2;2;2;2;2	Amine oxidase;Membrane primary amine oxidase;Retina-specific copper amine oxidase	Aoc3;Aoc2	;;;;	5	2	2	2	0	0	0	1	2	0	2	1	1	0	0	0	1	2	0	2	1	1	0	0	0	1	2	0	2	1	1	3.8	3.8	3.8	52.848	470	470;730;629;757;765	0	3.9101
B7ZNJ1;Q3UH17;A0A087WS56;B9EHT6;A0A087WSN6;Q3UHL6;Q3UGY5;A0A087WR50;P11276;Q3TBB4;Q3TCF1;Q3TCL7;Q3UHR1;Q4KL80;Q8R3F3;Q3UZF9;A0A087WS99;Q99KD0	B7ZNJ1;Q3UH17;A0A087WS56;B9EHT6;A0A087WSN6;Q3UHL6;Q3UGY5;A0A087WR50;P11276;Q3TBB4;Q3TCF1;Q3TCL7;Q3UHR1	8;8;8;8;8;8;8;8;8;7;7;6;6;2;2;2;1;1	8;8;8;8;8;8;8;8;8;7;7;6;6;2;2;2;1;1	8;8;8;8;8;8;8;8;8;7;7;6;6;2;2;2;1;1	Fibronectin;Anastellin	Fn1	;;;;;;;;;;;;	18	8	8	8	0	2	1	0	3	0	5	4	5	0	2	1	0	3	0	5	4	5	0	2	1	0	3	0	5	4	5	5.8	5.8	5.8	239.72	2176	2176;2266;2266;2271;2296;2361;2386;2386;2477;1832;2296;1331;1920;383;810;1055;200;216	0	53.93		By MS/MS	By MS/MS
D3Z1S6;Q91XA9	D3Z1S6;Q91XA9	1;1	1;1	1;1	Acidic mammalian chitinase	Chia1;Chia	;	2	1	1	1	0	1	1	0	1	0	1	1	1	0	1	1	0	1	0	1	1	1	0	1	1	0	1	0	1	1	1	4.2	4.2	4.2	24.536	215	215;473	0.0097466	1.062		By MS/MS	By MS/MS
Q80XL9;Q8BXQ8	Q80XL9;Q8BXQ8	1;1	1;1	1;1	Protein FAM53C	Fam53c	;	2	1	1	1	0	1	1	0	1	0	1	1	1	0	1	1	0	1	0	1	1	1	0	1	1	0	1	0	1	1	1	18.9	18.9	18.9	5.6035	53	53;393	0.0061856	1.2424		By MS/MS	By MS/MS
O89067	O89067	1	1	1		Pou2f2		1	1	1	1	0	1	1	0	1	0	1	1	1	0	1	1	0	1	0	1	1	1	0	1	1	0	1	0	1	1	1	14.3	14.3	14.3	8.7129	77	77	0.0045147	1.6934		By MS/MS	By MS/MS
Q6VEU6;P02798	Q6VEU6;P02798	1;1;1	1;1;1	1;1;1	Metallothionein;Metallothionein-2	Mt2	;;	3	1	1	1	1	0	1	0	1	0	1	1	1	1	0	1	0	1	0	1	1	1	1	0	1	0	1	0	1	1	1	19.7	19.7	19.7	6.0562	61	61;61;61	0	7.9689	By matching		By MS/MS
D3Z4N4;E9QLW5;P09535	D3Z4N4;E9QLW5;P09535	1;1;1	1;1;1	1;1;1	Insulin-like growth factor II;Insulin-like growth factor II;Preptin	Igf2	;;	3	1	1	1	0	0	1	0	1	0	1	1	1	0	0	1	0	1	0	1	1	1	0	0	1	0	1	0	1	1	1	15.5	15.5	15.5	11.107	103	103;191;180	0	4.7086			By MS/MS
Q3UHS6;Q80TM2;P26039;Q3TBC3;Q0V930	Q3UHS6;Q80TM2;P26039;Q3TBC3;Q0V930	5;5;5;3;3	5;5;5;3;3	5;5;5;3;3	Talin-1	Tln1	;;;;	5	5	5	5	0	1	0	0	2	0	4	4	3	0	1	0	0	2	0	4	4	3	0	1	0	0	2	0	4	4	3	3	3	3	269.83	2541	2541;2564;2541;1051;1190	0	22.761		By MS/MS
P47877;D3YU40;Q9D057	P47877;D3YU40;Q9D057	4;3;3	4;3;3	4;3;3	Insulin-like growth factor-binding protein 2	Igfbp2	;;	3	4	4	4	0	0	0	0	2	0	3	3	4	0	0	0	0	2	0	3	3	4	0	0	0	0	2	0	3	3	4	17.4	17.4	17.4	32.846	305	305;158;304	0	35.586
Q19PV3;Q3TDZ5;Q3TAY9;Q3UXJ2;Q3UBG4;A1L354;A1L353;P82198	Q19PV3;Q3TDZ5;Q3TAY9;Q3UXJ2;Q3UBG4;A1L354;A1L353;P82198	1;1;1;1;1;1;1;1	1;1;1;1;1;1;1;1	1;1;1;1;1;1;1;1	Transforming growth factor-beta-induced protein ig-h3	Tgfbi	;;;;;;;	8	1	1	1	0	0	0	0	1	0	1	1	1	0	0	0	0	1	0	1	1	1	0	0	0	0	1	0	1	1	1	17	17	17	4.8954	47	47;536;644;651;683;683;683;683	0.0099602	1.1474
Q3UN43;Q4KMV6;Q571D8;Q3U325;Q80XQ2	Q3UN43;Q4KMV6;Q571D8;Q3U325;Q80XQ2	1;1;1;1;1	1;1;1;1;1	1;1;1;1;1	TBC1 domain family member 5	Tbc1d5	;;;;	5	1	1	1	1	1	1	1	1	1	0	1	1	1	1	1	1	1	1	0	1	1	1	1	1	1	1	1	0	1	1	1.3	1.3	1.3	62.176	544	544;653;821;837;815	1	-2	By MS/MS	By MS/MS	By matching
Q9JKR6;Q8VCI2;F6TRP3;E0CYZ2	Q9JKR6	15;7;3;2	15;7;3;2	15;7;3;2	Hypoxia up-regulated protein 1	Hyou1		4	15	15	15	12	0	2	1	1	4	0	5	2	12	0	2	1	1	4	0	5	2	12	0	2	1	1	4	0	5	2	23.3	23.3	23.3	111.18	999	999;504;227;172	0	26.279	By MS/MS		By matching
Q0VDL6;Q04899	Q0VDL6;Q04899	1;1	1;1	1;1	Cyclin-dependent kinase 18	Cdk18	;	2	1	1	1	0	1	1	0	1	1	0	1	1	0	1	1	0	1	1	0	1	1	0	1	1	0	1	1	0	1	1	2	2	2	51.847	451	451;451	1	-2		By matching	By MS/MS
P10639	P10639	2	2	2	Thioredoxin	Txn		1	2	2	2	1	0	0	0	1	1	0	2	2	1	0	0	0	1	1	0	2	2	1	0	0	0	1	1	0	2	2	21	21	21	11.675	105	105	0	2.7721	By MS/MS
B1AZS9;O08807	B1AZS9;O08807	2;2	1;1	1;1	Peroxiredoxin-4	Prdx4	;	2	2	1	1	1	0	1	1	0	1	0	1	2	0	0	0	0	0	0	0	1	1	0	0	0	0	0	0	0	1	1	8.3	4.8	4.8	26.391	229	229;274	0.0097276	1.0521	By matching		By matching
Q04447	Q04447	10	10	10	Creatine kinase B-type	Ckb		1	10	10	10	7	0	1	2	0	4	0	6	7	7	0	1	2	0	4	0	6	7	7	0	1	2	0	4	0	6	7	43.6	43.6	43.6	42.713	381	381	0	51.851	By MS/MS		By matching
Q3TND1;P45878;Q3UND3	Q3TND1;P45878;Q3UND3	2;2;1	2;2;1	2;2;1	Peptidyl-prolyl cis-trans isomerase;Peptidyl-prolyl cis-trans isomerase FKBP2	Fkbp2	;;	3	2	2	2	2	0	1	1	0	1	0	2	2	2	0	1	1	0	1	0	2	2	2	0	1	1	0	1	0	2	2	18.6	18.6	18.6	15.344	140	140;140;140	0	11.962	By MS/MS		By matching
Q3TG17;H3BLL4;B2M1R6;Q3U9Q3;Q3U6X2;Q3TUA1;Q3TJ38;Q5FWJ5;Q3TL71;P61979-3;P61979;P61979-2;H3BLP7;D3Z5X4;D3YWG1;H3BK96;H3BKD0	Q3TG17;H3BLL4;B2M1R6;Q3U9Q3;Q3U6X2;Q3TUA1;Q3TJ38;Q5FWJ5;Q3TL71;P61979-3;P61979;P61979-2;H3BLP7;D3Z5X4;D3YWG1	3;3;3;3;3;3;3;3;3;3;3;3;2;2;2;1;1	3;3;3;3;3;3;3;3;3;3;3;3;2;2;2;1;1	3;3;3;3;3;3;3;3;3;3;3;3;2;2;2;1;1	Heterogeneous nuclear ribonucleoprotein K	Hnrnpk;Gm7964	;;;;;;;;;;;;;;	17	3	3	3	1	0	0	1	0	1	0	2	3	1	0	0	1	0	1	0	2	3	1	0	0	1	0	1	0	2	3	13.7	13.7	13.7	43.254	394	394;394;440;450;459;463;463;464;464;439;463;464;210;439;463;257;299	0	25.31	By MS/MS
Q01853;Q8BNF8	Q01853;Q8BNF8	11;9	11;9	11;9	Transitional endoplasmic reticulum ATPase	Vcp	;	2	11	11	11	5	0	1	0	0	2	0	4	5	5	0	1	0	0	2	0	4	5	5	0	1	0	0	2	0	4	5	25.3	25.3	25.3	89.321	806	806;723	0	27.817	By MS/MS		By matching
P61458	P61458	2	2	2	Pterin-4-alpha-carbinolamine dehydratase	Pcbd1		1	2	2	2	2	0	2	0	0	1	0	2	2	2	0	2	0	0	1	0	2	2	2	0	2	0	0	1	0	2	2	17.3	17.3	17.3	11.985	104	104	0	3.0283	By MS/MS		By MS/MS
Q5SUV8;O88533;Q5SUV9;Q3TUH2;O35958	Q5SUV8;O88533;Q5SUV9	6;6;4;2;1	6;6;4;2;1	6;6;4;2;1	Aromatic-L-amino-acid decarboxylase	Ddc	;;	5	6	6	6	4	0	0	0	0	3	0	4	2	4	0	0	0	0	3	0	4	2	4	0	0	0	0	3	0	4	2	19	19	19	53.873	480	480;480;253;131;142	0	25.197	By MS/MS
Q545F0;P34884	Q545F0;P34884	2;2	2;2	2;2	Macrophage migration inhibitory factor	Mif	;	2	2	2	2	1	0	0	0	0	1	0	2	2	1	0	0	0	0	1	0	2	2	1	0	0	0	0	1	0	2	2	26.1	26.1	26.1	12.504	115	115;115	0	5.1837	By MS/MS
A5GZX3;Q9CPU0	A5GZX3;Q9CPU0	1;1	1;1	1;1	Lactoylglutathione lyase	Glo1	;	2	1	1	1	1	0	0	0	0	1	0	1	1	1	0	0	0	0	1	0	1	1	1	0	0	0	0	1	0	1	1	5.4	5.4	5.4	20.809	184	184;184	0	2.383	By MS/MS
O08553	O08553	4	4	4	Dihydropyrimidinase-related protein 2	Dpysl2		1	4	4	4	2	0	0	0	0	1	0	2	1	2	0	0	0	0	1	0	2	1	2	0	0	0	0	1	0	2	1	14.2	14.2	14.2	62.277	572	572	0	4.7161	By MS/MS
P56480	P56480	10	10	10	ATP synthase subunit beta, mitochondrial	Atp5b		1	10	10	10	9	0	2	3	1	7	0	3	3	9	0	2	3	1	7	0	3	3	9	0	2	3	1	7	0	3	3	27.8	27.8	27.8	56.3	529	529	0	25.124	By MS/MS		By matching
Q61171;D3Z4A4;Q5M9N9	Q61171;D3Z4A4;Q5M9N9	5;3;3	5;3;3	5;3;3	Peroxiredoxin-2	Prdx2	;;	3	5	5	5	2	1	0	1	1	2	0	2	2	2	1	0	1	1	2	0	2	2	2	1	0	1	1	2	0	2	2	39.9	39.9	39.9	21.778	198	198;147;198	0	16.723	By MS/MS	By MS/MS
A1L0U6;A2AS98;P28660-2;P28660	A1L0U6;A2AS98;P28660-2;P28660	1;1;1;1	1;1;1;1	1;1;1;1	Nck-associated protein 1	Nckap1	;;;	4	1	1	1	1	1	1	1	1	1	0	1	1	1	1	1	1	1	1	0	1	1	1	1	1	1	1	1	0	1	1	0.8	0.8	0.8	129.38	1133	1133;1134;1037;1128	0.0080483	1.1916	By MS/MS	By MS/MS	By MS/MS
Q544Y7;P18760;F8WGL3;Q9CX22;Q3UHW9;P45591	Q544Y7;P18760;F8WGL3;Q9CX22	4;4;3;3;1;1	4;4;3;3;1;1	4;4;3;3;1;1	Cofilin-1	Cfl1	;;;	6	4	4	4	3	1	1	0	1	3	0	4	4	3	1	1	0	1	3	0	4	4	3	1	1	0	1	3	0	4	4	34.3	34.3	34.3	18.559	166	166;166;227;229;166;166	0	10.165	By MS/MS	By matching	By matching
B2RTM0;P62806;Q61667;Q6B822	B2RTM0;P62806;Q61667	6;6;4;2	6;6;4;2	6;6;4;2	Histone H4	Hist2h4;Hist1h4a	;;	4	6	6	6	5	3	3	4	2	5	0	4	4	5	3	3	4	2	5	0	4	4	5	3	3	4	2	5	0	4	4	57.3	57.3	57.3	11.367	103	103;103;55;43	0	15.108	By MS/MS	By MS/MS	By MS/MS
P35700;B1AXW5;B1AXW6;Q3U9J9;B1AXW4	P35700;B1AXW5;B1AXW6;Q3U9J9	7;6;6;6;3	7;6;6;6;3	6;5;5;5;3	Peroxiredoxin-1	Prdx1	;;;	5	7	7	6	6	1	3	1	0	4	0	3	4	6	1	3	1	0	4	0	3	4	5	1	2	0	0	3	0	3	3	41.2	41.2	37.2	22.176	199	199;170;176;199;123	0	11.904	By MS/MS	By MS/MS	By matching
P14152;B1ATQ3	P14152	10;2	10;2	10;2	Malate dehydrogenase, cytoplasmic	Mdh1		2	10	10	10	9	2	4	1	0	7	0	7	6	9	2	4	1	0	7	0	7	6	9	2	4	1	0	7	0	7	6	29.9	29.9	29.9	36.511	334	334;156	0	19.896	By MS/MS	By matching	By MS/MS
P62204;Q3UKW2;Q9D6P8;G3UX57	P62204;Q3UKW2;Q9D6P8	7;6;4;1	7;6;4;1	7;6;4;1	Calmodulin;Calmodulin-like protein 3	Calm1;Calml3	;;	4	7	7	7	5	2	3	1	0	3	0	4	6	5	2	3	1	0	3	0	4	6	5	2	3	1	0	3	0	4	6	50.3	50.3	50.3	16.837	149	149;197;149;39	0	53.836	By MS/MS	By MS/MS	By MS/MS
P52480;Q3UEH4;E9Q509;Q3UEI4;A7MCU9;G3X925;P53657	P52480	18;1;1;1;1;1;1	18;1;1;1;1;1;1	2;0;0;0;0;0;0	Pyruvate kinase PKM	Pkm		7	18	18	2	16	1	2	6	0	13	0	9	11	16	1	2	6	0	13	0	9	11	2	0	1	1	0	2	0	0	1	45.2	45.2	6.2	57.844	531	531;543;543;546;570;574;574	0	192.88	By MS/MS	By matching	By MS/MS
P27773;F6Q404	P27773	26;3	26;3	26;3	Protein disulfide-isomerase A3	Pdia3		2	26	26	26	19	1	3	5	0	15	0	12	10	19	1	3	5	0	15	0	12	10	19	1	3	5	0	15	0	12	10	59.2	59.2	59.2	56.678	505	505;124	0	101.65	By MS/MS	By matching	By MS/MS
Q9QXV0	Q9QXV0	6	6	6	ProSAAS;KEP;Big SAAS;Little SAAS;Big PEN-LEN;PEN;PEN-20;PEN-19;Little LEN;Big LEN	Pcsk1n		1	6	6	6	3	1	1	2	0	5	0	3	2	3	1	1	2	0	5	0	3	2	3	1	1	2	0	5	0	3	2	33.3	33.3	33.3	27.27	258	258	0	12.568	By MS/MS	By matching	By MS/MS
B2MWM9;P14211;Q3UWP8;Q62041	B2MWM9;P14211;Q3UWP8	12;12;11;1	12;12;11;1	12;12;11;1	Calreticulin	Calr	;;	4	12	12	12	11	3	2	4	0	9	0	9	6	11	3	2	4	0	9	0	9	6	11	3	2	4	0	9	0	9	6	45.9	45.9	45.9	47.994	416	416;416;368;178	0	68.832	By MS/MS	By MS/MS	By MS/MS
A5JUZ1;A0A0A6YW67;E9Q9J0;Q66JP1;Q8C2K3;Q642L7;E9Q4P0;E9Q5F6;Q922B0;E9QNP0;Q5SX22;Q3TH47;Q78XY9;Q6NZC5;Q8R0Z9;Q922Z8;Q8VC46;P62984;P62983;P0CG49;P0CG50;B0LAC2;J3QK04;D3YYZ2	A5JUZ1;A0A0A6YW67;E9Q9J0;Q66JP1;Q8C2K3;Q642L7;E9Q4P0;E9Q5F6;Q922B0;E9QNP0;Q5SX22;Q3TH47;Q78XY9;Q6NZC5;Q8R0Z9;Q922Z8;Q8VC46;P62984;P62983;P0CG49;P0CG50;B0LAC2;J3QK04	3;3;3;3;3;3;3;3;3;3;3;3;3;3;3;3;3;3;3;3;3;2;2;1	3;3;3;3;3;3;3;3;3;3;3;3;3;3;3;3;3;3;3;3;3;2;2;1	3;3;3;3;3;3;3;3;3;3;3;3;3;3;3;3;3;3;3;3;3;2;2;1	Ubiquitin-60S ribosomal protein L40;Ubiquitin;60S ribosomal protein L40;Ubiquitin-40S ribosomal protein S27a;Ubiquitin;40S ribosomal protein S27a;Polyubiquitin-B;Ubiquitin;Polyubiquitin-C;Ubiquitin;Ubiquitin-related 1;Ubiquitin-related 2	Ubc;Gm8797;Uba52;Gm1821;Rps27a;Kxd1;Ubb;Gm7808	;;;;;;;;;;;;;;;;;;;;;;	24	3	3	3	3	3	2	3	0	3	0	1	1	3	3	2	3	0	3	0	1	1	3	3	2	3	0	3	0	1	1	44.7	44.7	44.7	8.5647	76	76;77;96;128;153;156;193;201;202;232;236;278;305;305;354;582;658;128;156;305;734;71;128;122	0	12.128	By MS/MS	By MS/MS	By MS/MS
Q14DR9;Q8R2E9	Q14DR9;Q8R2E9	10;10	10;10	9;9	ERO1-like protein beta	Ero1lb	;	2	10	10	9	7	0	2	4	0	9	0	4	2	7	0	2	4	0	9	0	4	2	6	0	2	4	0	8	0	4	2	25.7	25.7	23.3	53.518	467	467;467	0	25.403	By MS/MS		By MS/MS
Q3UZU8;Q3TY66;P16014;Q8BP91;Q3UZP2;Q9CTW1	Q3UZU8;Q3TY66;P16014;Q8BP91;Q3UZP2	5;5;5;4;3;2	5;5;5;4;3;2	5;5;5;4;3;2	Secretogranin-1;CCB peptide;PE-11	Chgb	;;;;	6	5	5	5	2	0	0	2	0	4	0	3	3	2	0	0	2	0	4	0	3	3	2	0	0	2	0	4	0	3	3	10.8	10.8	10.8	77.779	676	676;677;677;677;430;206	0	35.362	By MS/MS
P12968	P12968	1	1	1	Islet amyloid polypeptide	Iapp		1	1	1	1	0	0	0	1	0	1	0	1	1	0	0	0	1	0	1	0	1	1	0	0	0	1	0	1	0	1	1	7.5	7.5	7.5	10.022	93	93	0.0061728	1.2365
P08228;Q8C355	P08228	6;1	6;1	6;1	Superoxide dismutase [Cu-Zn]	Sod1		2	6	6	6	5	0	1	0	0	5	0	1	2	5	0	1	0	0	5	0	1	2	5	0	1	0	0	5	0	1	2	43.5	43.5	43.5	15.942	154	154;128	0	15.344	By MS/MS		By matching
A0A0R4J0Z1;P08003	A0A0R4J0Z1;P08003	7;7	7;7	7;7	Protein disulfide-isomerase A4	Pdia4	;	2	7	7	7	4	0	1	0	0	3	0	5	4	4	0	1	0	0	3	0	5	4	4	0	1	0	0	3	0	5	4	15.4	15.4	15.4	72.369	641	641;638	0	14.157	By MS/MS		By matching
Q3U5K7;Q9EPX9;P21460;A2APX3	Q3U5K7;Q9EPX9;P21460;A2APX3	3;3;3;2	3;3;3;2	3;3;3;2	Cystatin-C	Cst3	;;;	4	3	3	3	1	0	0	0	0	3	0	1	3	1	0	0	0	0	3	0	1	3	1	0	0	0	0	3	0	1	3	32.8	32.8	32.8	15.217	137	137;140;140;102	0	10.739	By MS/MS
A0A0N4SUM2;B7ZP22;O88569-3;O88569-2;O88569	A0A0N4SUM2;B7ZP22;O88569-3;O88569-2;O88569	3;3;3;3;3	3;3;3;3;3	3;3;3;3;3	Heterogeneous nuclear ribonucleoproteins A2/B1	Hnrnpa2b1	;;;;	5	3	3	3	3	0	0	0	0	2	0	3	2	3	0	0	0	0	2	0	3	2	3	0	0	0	0	2	0	3	2	22.6	22.6	22.6	16.936	155	155;341;301;341;353	0	7.0467	By MS/MS
A2A813;Q99LX0;A2A815;D3K2X3;A2A817;A2A816	A2A813;Q99LX0;A2A815;D3K2X3;A2A817;A2A816	6;6;5;3;3;3	6;6;5;3;3;3	6;6;5;3;3;3	Protein deglycase DJ-1	Park7;Dj1	;;;;;	6	6	6	6	4	0	0	0	0	3	0	2	3	4	0	0	0	0	3	0	2	3	4	0	0	0	0	3	0	2	3	45.1	45.1	45.1	18.474	175	175;189;136;73;84;125	0	22.059	By MS/MS
B1B0C7;E9PZ16;Q52KG8;Q5RKM8;Q3UHH3;Q05793	B1B0C7;E9PZ16;Q52KG8;Q5RKM8;Q3UHH3;Q05793	2;2;1;1;1;1	2;2;1;1;1;1	2;2;1;1;1;1	Basement membrane-specific heparan sulfate proteoglycan core protein;Endorepellin;LG3 peptide	Hspg2	;;;;;	6	2	2	2	0	0	1	1	1	0	0	1	1	0	0	1	1	1	0	0	1	1	0	0	1	1	1	0	0	1	1	0.6	0.6	0.6	469.02	4375	4375;4383;834;1100;2672;3707	0.0023585	2.008			By MS/MS
Q58E35;P47955;E9Q3T0	Q58E35;P47955;E9Q3T0	2;2;1	2;2;1	2;2;1	60S acidic ribosomal protein P1	Rplp1;Gm10073	;;	3	2	2	2	1	0	0	0	1	0	0	1	1	1	0	0	0	1	0	0	1	1	1	0	0	0	1	0	0	1	1	51.8	51.8	51.8	11.475	114	114;114;114	0.006424	1.3473	By MS/MS
Q80ZP8;A8C1V1;Q3TMX5;F6USD5;F6T4L3;Q9CXI5	Q80ZP8;A8C1V1;Q3TMX5;F6USD5;F6T4L3;Q9CXI5	3;3;3;2;2;2	3;3;3;2;2;2	3;3;3;2;2;2	Mesencephalic astrocyte-derived neurotrophic factor	Manf	;;;;;	6	3	3	3	1	0	1	0	0	0	0	3	3	1	0	1	0	0	0	0	3	3	1	0	1	0	0	0	0	3	3	16.4	16.4	16.4	19.012	165	165;170;179;121;128;179	0	7.0207	By MS/MS		By matching
Q91WD9	Q91WD9	2	2	2	Secretagogin	Scgn		1	2	2	2	2	0	1	0	0	0	0	1	1	2	0	1	0	0	0	0	1	1	2	0	1	0	0	0	0	1	1	12	12	12	32.145	276	276	0	4.5505	By MS/MS		By matching
P28481-2;P28481-7;P28481-6;P28481-5;P28481-4;P28481-1;P28481	P28481-2;P28481-7;P28481-6;P28481-5;P28481-4;P28481-1;P28481	4;4;4;4;4;4;4	4;4;4;4;4;4;4	4;4;4;4;4;4;4	Collagen alpha-1(II) chain;Collagen alpha-1(II) chain;Chondrocalcin	Col2a1	;;;;;;	7	4	4	4	0	2	2	0	0	0	0	1	2	0	2	2	0	0	0	0	1	2	0	2	2	0	0	0	0	1	2	3.1	3.1	3.1	131.86	1390	1390;1419;1441;1441;1458;1458;1487	0	11.334		By MS/MS	By MS/MS
Q810T7;E9PVA5	Q810T7;E9PVA5	1;1	1;1	1;1		Slc22a30	;	2	1	1	1	0	1	0	0	0	0	0	1	1	0	1	0	0	0	0	0	1	1	0	1	0	0	0	0	0	1	1	3.1	3.1	3.1	54.565	480	480;480	0.0064516	1.3717		By matching
Q91Z57;Q3U9R7;Q3UB84;Q3UAS7;Q3TXK9;Q3TWI5;P47791-2;P47791	Q91Z57;Q3U9R7;Q3UB84;Q3UAS7;Q3TXK9;Q3TWI5;P47791-2;P47791	3;3;3;3;3;3;3;3	3;3;3;3;3;3;3;3	3;3;3;3;3;3;3;3	Glutathione reductase, mitochondrial	Gsr	;;;;;;;	8	3	3	3	1	0	0	0	0	0	0	1	2	1	0	0	0	0	0	0	1	2	1	0	0	0	0	0	0	1	2	15.2	15.2	15.2	40.549	375	375;453;482;482;483;491;474;500	0	15.682	By MS/MS
Q3UKA4;P00329	Q3UKA4;P00329	4;4	4;4	4;4	Alcohol dehydrogenase 1	Adh1	;	2	4	4	4	3	0	0	0	0	0	0	2	2	3	0	0	0	0	0	0	2	2	3	0	0	0	0	0	0	2	2	20.8	20.8	20.8	39.771	375	375;375	0	41.552	By MS/MS
P62814;A0A0U1RNU9;Q99KA3;Q6P6I3;Q91YH6;Q8C3L6	P62814	3;1;1;1;1;1	3;1;1;1;1;1	3;1;1;1;1;1	V-type proton ATPase subunit B, brain isoform	Atp6v1b2		6	3	3	3	0	0	0	0	0	0	0	3	2	0	0	0	0	0	0	0	3	2	0	0	0	0	0	0	0	3	2	12.5	12.5	12.5	56.55	511	511;216;400;512;513;513	0	11.445
Q8R3M1;Q542M2;P61924	Q8R3M1;Q542M2;P61924	1;1;1	1;1;1	1;1;1	Coatomer subunit zeta-1	Copz1	;;	3	1	1	1	0	0	0	0	0	0	0	1	1	0	0	0	0	0	0	0	1	1	0	0	0	0	0	0	0	1	1	8.6	8.6	8.6	18.516	163	163;177;177	0.0080972	1.1972
Q561N4;P68037;D3YZS3;Q3TIH9	Q561N4;P68037;D3YZS3;Q3TIH9	2;2;1;1	2;2;1;1	2;2;1;1	Ubiquitin-conjugating enzyme E2 L3	Ube2l3	;;;	4	2	2	2	0	0	0	0	0	0	0	1	1	0	0	0	0	0	0	0	1	1	0	0	0	0	0	0	0	1	1	24	24	24	17.861	154	154;154;119;154	0.0022936	1.8435
Q7TQZ4;L7MU51;A2AUA2	Q7TQZ4;L7MU51;A2AUA2	1;1;1	1;1;1	1;1;1	Olfactory receptor	Olfr1249;Olfr1253	;;	3	1	1	1	0	0	0	0	0	0	0	1	1	0	0	0	0	0	0	0	1	1	0	0	0	0	0	0	0	1	1	2.8	2.8	2.8	35.514	318	318;318;318	1	-2
Q9D1M0	Q9D1M0	1	1	1	Protein SEC13 homolog	Sec13		1	1	1	1	0	0	0	0	0	0	0	1	1	0	0	0	0	0	0	0	1	1	0	0	0	0	0	0	0	1	1	8.1	8.1	8.1	35.565	322	322	0	8.3782
E0CZ27;A1L0U3;F8WI35;A1L0V4;B9EI85;P84244;P84228;P68433;P02301;E0CYN1;E0CYR7	E0CZ27;A1L0U3;F8WI35;A1L0V4;B9EI85;P84244;P84228;P68433;P02301	3;3;3;3;3;3;3;3;3;1;1	3;3;3;3;3;3;3;3;3;1;1	3;3;3;3;3;3;3;3;3;1;1	Histone H3;Histone H3.3;Histone H3.2;Histone H3.1;Histone H3.3C	H3f3a;Hist1h3e;Hist1h3i;Hist2h3b;Hist1h3b;Hist1h3a;H3f3c	;;;;;;;;	11	3	3	3	3	0	1	1	1	3	1	0	1	3	0	1	1	1	3	1	0	1	3	0	1	1	1	3	1	0	1	19.3	19.3	19.3	13.322	119	119;133;135;135;136;136;136;136;136;52;55	0	2.18	By MS/MS		By MS/MS
Q9CUG7;Q0VF76	Q9CUG7;Q0VF76	1;1	1;1	1;1		Ttc39d	;	2	1	1	1	0	0	0	0	1	0	1	0	1	0	0	0	0	1	0	1	0	1	0	0	0	0	1	0	1	0	1	1.5	1.5	1.5	53.051	458	458;604	0.0061224	1.2244
A0A087WNN3;Q6ZPR6-2;Q6ZPR6	A0A087WNN3;Q6ZPR6-2;Q6ZPR6	2;2;2	2;2;2	2;2;2	Inhibitor of Bruton tyrosine kinase	Ibtk	;;	3	2	2	2	1	1	1	2	1	1	0	0	1	1	1	1	2	1	1	0	0	1	1	1	1	2	1	1	0	0	1	3.4	3.4	3.4	54.675	495	495;1251;1352	1	-2	By matching	By MS/MS	By matching
Q5RKP0;Q499X4;Q3TXD3;Q62465;Q3U331	Q5RKP0;Q499X4;Q3TXD3;Q62465;Q3U331	4;4;4;4;3	4;4;4;4;3	4;4;4;4;3	Synaptic vesicle membrane protein VAT-1 homolog	Vat1	;;;;	5	4	4	4	4	0	0	1	0	1	0	0	1	4	0	0	1	0	1	0	0	1	4	0	0	1	0	1	0	0	1	15	15	15	42.521	401	401;406;406;406;406	0	8.9319	By MS/MS
Q9D0A2;Q9CZP6;Q5YLW3;Q3UK56;Q3UCL7;P62908;O89068;A0A140LI77;D3YV43	Q9D0A2;Q9CZP6;Q5YLW3;Q3UK56;Q3UCL7;P62908	4;4;4;4;4;4;1;1;1	4;4;4;4;4;4;1;1;1	4;4;4;4;4;4;1;1;1	40S ribosomal protein S3	Rps3	;;;;;	9	4	4	4	3	0	1	0	0	2	0	0	1	3	0	1	0	0	2	0	0	1	3	0	1	0	0	2	0	0	1	21.8	21.8	21.8	26.64	243	243;243;243;243;243;243;123;144;191	0	2.3034	By MS/MS		By matching
G3UYV7;Q059I1;P62858	G3UYV7;Q059I1;P62858	1;1;1	1;1;1	1;1;1	40S ribosomal protein S28	Rps28	;;	3	1	1	1	1	0	0	0	0	1	0	0	1	1	0	0	0	0	1	0	0	1	1	0	0	0	0	1	0	0	1	21.4	21.4	21.4	6.3442	56	56;69;69	0.0022989	1.8546	By MS/MS
Q3TCL2;Q5U415;Q3UDY1;P45376;D3YVJ7;Q3ULP0	Q3TCL2;Q5U415;Q3UDY1;P45376;D3YVJ7;Q3ULP0	3;3;3;3;2;2	3;3;3;3;2;2	3;3;3;3;2;2	Aldose reductase	Akr1b3;Akr1b1	;;;;;	6	3	3	3	2	0	0	0	0	2	0	0	1	2	0	0	0	0	2	0	0	1	2	0	0	0	0	2	0	0	1	14.8	14.8	14.8	35.051	310	310;316;316;316;176;185	0	2.493	By MS/MS
Q5BLK2;P60867	Q5BLK2;P60867	1;1	1;1	1;1	40S ribosomal protein S20	Rps20	;	2	1	1	1	1	0	0	0	0	1	0	0	1	1	0	0	0	0	1	0	0	1	1	0	0	0	0	1	0	0	1	10.1	10.1	10.1	13.373	119	119;119	0	2.3875	By MS/MS
Q5SXR6;Q68FD5;Q80U89;Q3UPJ3;Q3TAN1;Q8K2I5;Q3TYQ2;Q3U0H2;F6Z1R4;Q3TJ98	Q5SXR6;Q68FD5;Q80U89;Q3UPJ3	8;8;7;5;3;3;3;3;1;1	8;8;7;5;3;3;3;3;1;1	8;8;7;5;3;3;3;3;1;1	Clathrin heavy chain;Clathrin heavy chain 1	Cltc;mKIAA0034	;;;	10	8	8	8	6	0	0	0	0	1	0	0	2	6	0	0	0	0	1	0	0	2	6	0	0	0	0	1	0	0	2	6.4	6.4	6.4	191.98	1679	1679;1675;1684;983;388;504;505;521;216;306	0	10.037	By MS/MS
E0CXB1;Q9QUM9	E0CXB1;Q9QUM9	3;3	3;3	3;3	Proteasome subunit alpha type-6	Psma6	;	2	3	3	3	3	0	0	0	0	2	0	0	1	3	0	0	0	0	2	0	0	1	3	0	0	0	0	2	0	0	1	17.2	17.2	17.2	25.264	227	227;246	0	5.1747	By MS/MS
B2CY77;P14206	B2CY77;P14206	3;3	3;3	3;3	40S ribosomal protein SA	Rpsa	;	2	3	3	3	2	1	1	1	0	2	0	0	2	2	1	1	1	0	2	0	0	2	2	1	1	1	0	2	0	0	2	17.6	17.6	17.6	32.85	295	295;295	0	15.808	By MS/MS	By matching	By matching
A4FUS1;Q641N3;Q5CZY9;P14131	A4FUS1;Q641N3;Q5CZY9;P14131	1;1;1;1	1;1;1;1	1;1;1;1	40S ribosomal protein S16	Rps16	;;;	4	1	1	1	1	0	1	1	0	1	0	0	1	1	0	1	1	0	1	0	0	1	1	0	1	1	0	1	0	0	1	6.8	6.8	6.8	16.445	146	146;157;172;146	0.0065789	1.4913	By MS/MS		By matching
Q4FK36;Q9R0P5	Q4FK36;Q9R0P5	4;4	4;4	4;4	Destrin	Dstn	;	2	4	4	4	4	0	0	1	0	3	0	0	2	4	0	0	1	0	3	0	0	2	4	0	0	1	0	3	0	0	2	29.1	29.1	29.1	18.521	165	165;165	0	5.419	By MS/MS
P08249;A0A0G2JF23;A0A0G2JGY4	P08249;A0A0G2JF23	7;4;3	7;4;3	7;4;3	Malate dehydrogenase, mitochondrial	Mdh2	;	3	7	7	7	4	0	1	1	0	5	0	0	1	4	0	1	1	0	5	0	0	1	4	0	1	1	0	5	0	0	1	26.6	26.6	26.6	35.611	338	338;199;153	0	8.6533	By MS/MS		By matching
Q9JK98;Q549A5;Q06890;E9Q9B8;E9PUU2;E9PXG5;E9Q8Y5	Q9JK98;Q549A5;Q06890;E9Q9B8;E9PUU2;E9PXG5;E9Q8Y5	3;3;3;2;2;2;2	3;3;3;2;2;2;2	3;3;3;2;2;2;2	Clusterin;Clusterin;Clusterin beta chain;Clusterin alpha chain	Clu	;;;;;;	7	3	3	3	1	1	1	0	0	1	0	0	2	1	1	1	0	0	1	0	0	2	1	1	1	0	0	1	0	0	2	10.2	10.2	10.2	43.109	372	372;448;448;203;225;233;265	0	3.5578	By matching	By MS/MS	By matching
P19157;K9JA74;Q8VC73;F6RWR5;P46425	P19157;K9JA74;Q8VC73;F6RWR5;P46425	2;1;1;1;1	2;1;1;1;1	2;1;1;1;1	Glutathione S-transferase P 1;Glutathione S-transferase P 2	Gstp1;Gstp2;BC021614	;;;;	5	2	2	2	2	0	1	0	0	2	0	0	1	2	0	1	0	0	2	0	0	1	2	0	1	0	0	2	0	0	1	12.9	12.9	12.9	23.609	210	210;188;210;210;210	0	14.437	By MS/MS		By MS/MS
P63028	P63028	2	2	2	Translationally-controlled tumor protein	Tpt1		1	2	2	2	1	0	1	0	0	1	0	0	1	1	0	1	0	0	1	0	0	1	1	0	1	0	0	1	0	0	1	15.7	15.7	15.7	19.462	172	172	0	4.6427	By MS/MS		By MS/MS
Q5SZA3;Q3U292;Q149Z9;P15864;P43277;I7HFT9;Q07133;P43275	Q5SZA3;Q3U292;Q149Z9;P15864;P43277	3;3;3;3;3;1;1;1	3;3;3;3;3;1;1;1	1;1;1;1;1;0;0;0	Histone H1.2;Histone H1.3	Hist1h1c;Hist1h1d	;;;;	8	3	3	1	2	0	0	0	0	2	0	0	3	2	0	0	0	0	2	0	0	3	1	0	0	0	0	1	0	0	1	15.1	15.1	5.7	21.266	212	212;221;221;212;221;209;208;213	0	3.0804	By MS/MS
Q8VCK2;F6Y6L6;Q3U7I9;Q3UCW4;Q3UCD9;Q3UAQ1;Q3U8W5;Q3U7P0;Q3U651;Q3TXL5;Q3TWR6;Q3TWD0;Q3TIR0;Q8C243;P18242;F8WIR1;Q3TWL1;Q3UC89;Q3TJN3	Q8VCK2;F6Y6L6;Q3U7I9;Q3UCW4;Q3UCD9;Q3UAQ1;Q3U8W5;Q3U7P0;Q3U651;Q3TXL5;Q3TWR6;Q3TWD0;Q3TIR0;Q8C243;P18242;F8WIR1;Q3TWL1;Q3UC89;Q3TJN3	2;2;2;2;2;2;2;2;2;2;2;2;2;2;2;1;1;1;1	2;2;2;2;2;2;2;2;2;2;2;2;2;2;2;1;1;1;1	2;2;2;2;2;2;2;2;2;2;2;2;2;2;2;1;1;1;1	Cathepsin D	Ctsd	;;;;;;;;;;;;;;;;;;	19	2	2	2	1	0	0	0	0	1	0	0	1	1	0	0	0	0	1	0	0	1	1	0	0	0	0	1	0	0	1	16.6	16.6	16.6	23.931	217	217;278;404;410;410;410;410;410;410;410;410;410;410;445;410;274;335;410;410	0	3.3358	By MS/MS
Q9D1D4;Q9D1D4-2	Q9D1D4;Q9D1D4-2	2;1	2;1	2;1	Transmembrane emp24 domain-containing protein 10	Tmed10	;	2	2	2	2	1	0	0	0	0	2	0	0	1	1	0	0	0	0	2	0	0	1	1	0	0	0	0	2	0	0	1	9.1	9.1	9.1	24.911	219	219;94	0	2.9328	By MS/MS
Q3TVS6;Q3TC17;P10605;Q6LAF6	Q3TVS6;Q3TC17;P10605	5;5;5;2	5;5;5;2	5;5;5;2	Cathepsin B;Cathepsin B light chain;Cathepsin B heavy chain	Ctsb	;;	4	5	5	5	3	0	0	0	0	4	0	0	2	3	0	0	0	0	4	0	0	2	3	0	0	0	0	4	0	0	2	18.3	18.3	18.3	37.319	339	339;339;339;194	0	10.824	By MS/MS
Q3TNZ8;Q0V927;E9PYT5;Q3UHL7;E9QN70;B9EKB0;P02469	Q3TNZ8;Q0V927;E9PYT5;Q3UHL7;E9QN70;B9EKB0;P02469	1;1;1;1;1;1;1	1;1;1;1;1;1;1	1;1;1;1;1;1;1	Laminin subunit beta-1	Lamb1	;;;;;;	7	1	1	1	1	1	1	0	0	0	0	0	1	1	1	1	0	0	0	0	0	1	1	1	1	0	0	0	0	0	1	4.5	4.5	4.5	37.771	332	332;563;564;1834;1834;1834;1786	0	3.16	By MS/MS	By MS/MS	By MS/MS
Q3UH62;E9PZP2;B2RQQ4;Q5SEK5;E9QLR8;Q924W6-2;Q924W6	Q3UH62;E9PZP2;B2RQQ4;Q5SEK5;E9QLR8;Q924W6-2;Q924W6	1;1;1;1;1;1;1	1;1;1;1;1;1;1	1;1;1;1;1;1;1	Tripartite motif-containing protein 66	Trim66	;;;;;;	7	1	1	1	1	0	0	0	0	0	0	0	1	1	0	0	0	0	0	0	0	1	1	0	0	0	0	0	0	0	1	2	2	2	135.67	1233	1233;1233;1242;1344;1344;1209;1242	1	-2	By matching
Q14BR4;Q9DD04;P61750;P84084;D3YV25;F6UFB9;E9Q2C2;E9Q798	Q14BR4;Q9DD04;P61750;P84084	3;3;3;2;1;1;1;1	3;3;3;2;1;1;1;1	1;1;1;0;0;1;0;1	ADP-ribosylation factor 4;ADP-ribosylation factor 5	Arf4;Arf5	;;;	8	3	3	1	1	0	0	0	0	0	0	0	3	1	0	0	0	0	0	0	0	3	0	0	0	0	0	0	0	0	1	26.1	26.1	8.3	20.396	180	180;181;180;180;49;60;64;153	0	8.3647	By MS/MS
B9EHN0;Q02053	B9EHN0;Q02053	5;5	5;5	5;5	Ubiquitin-like modifier-activating enzyme 1	Uba1	;	2	5	5	5	4	0	0	0	0	0	0	0	2	4	0	0	0	0	0	0	0	2	4	0	0	0	0	0	0	0	2	7	7	7	117.81	1058	1058;1058	0	7.6117	By MS/MS
Q6ZQ38;Q3UMI9	Q6ZQ38;Q3UMI9	2;1	2;1	2;1	Cullin-associated NEDD8-dissociated protein 1	Cand1	;	2	2	2	2	1	0	0	0	0	0	0	0	1	1	0	0	0	0	0	0	0	1	1	0	0	0	0	0	0	0	1	2.1	2.1	2.1	136.33	1230	1230;700	0	4.9156	By MS/MS
P15105;D3Z121;D3YVK1;V9GZG5;V9GZP0	P15105;D3Z121;D3YVK1;V9GZG5	3;2;2;2;1	3;2;2;2;1	3;2;2;2;1	Glutamine synthetase	Glul	;;;	5	3	3	3	3	0	0	0	0	0	0	0	1	3	0	0	0	0	0	0	0	1	3	0	0	0	0	0	0	0	1	8.8	8.8	8.8	42.119	373	373;112;199;371;200	0	7.2383	By MS/MS
S4R256;S4R2A9;Q3UPL0-2;Q3UPL0	S4R256;S4R2A9;Q3UPL0-2;Q3UPL0	1;1;1;1	1;1;1;1	1;1;1;1	Protein transport protein Sec31A	Sec31a	;;;	4	1	1	1	1	0	0	0	0	0	0	0	1	1	0	0	0	0	0	0	0	1	1	0	0	0	0	0	0	0	1	4.4	4.4	4.4	39.35	364	364;934;1191;1230	0	2.4254	By MS/MS
Q3U344;Q8BSL7;P84078;P61205	Q3U344;Q8BSL7;P84078;P61205	3;3;3;3	1;1;1;1	1;1;1;1	ADP-ribosylation factor 2;ADP-ribosylation factor 1;ADP-ribosylation factor 3	Arf3;Arf2;Arf1	;;;	4	3	1	1	2	0	0	0	0	0	0	0	3	1	0	0	0	0	0	0	0	1	1	0	0	0	0	0	0	0	1	26	8.3	8.3	20.601	181	181;181;181;181	0	4.1907	By MS/MS
Q3TE06;Q9DBM8;Q3TNK2;Q3TJY2;Q3U136;Q80ZI9;O88342	Q3TE06;Q9DBM8;Q3TNK2;Q3TJY2;Q3U136;Q80ZI9;O88342	1;1;1;1;1;1;1	1;1;1;1;1;1;1	1;1;1;1;1;1;1	WD repeat-containing protein 1	Wdr1	;;;;;;	7	1	1	1	0	0	0	0	0	0	0	0	1	0	0	0	0	0	0	0	0	1	0	0	0	0	0	0	0	0	1	3.8	3.8	3.8	63.42	580	580;606;606;606;639;658;606	0	5.285
O55029	O55029	1	1	1	Coatomer subunit beta	Copb2		1	1	1	1	0	0	0	0	0	0	0	0	1	0	0	0	0	0	0	0	0	1	0	0	0	0	0	0	0	0	1	2.1	2.1	2.1	102.45	905	905	0	2.3673
Q91Y95;Q9JMH6-2;Q9JMH6	Q91Y95;Q9JMH6-2;Q9JMH6	1;1;1	1;1;1	1;1;1	Thioredoxin reductase 1, cytoplasmic	Txnrd1	;;	3	1	1	1	0	0	0	0	0	0	0	0	1	0	0	0	0	0	0	0	0	1	0	0	0	0	0	0	0	0	1	8.1	8.1	8.1	32.485	297	297;499;613	0.0065934	1.4914
P50516-2;P50516	P50516-2;P50516	1;1	1;1	1;1	V-type proton ATPase catalytic subunit A	Atp6v1a	;	2	1	1	1	0	0	0	0	0	0	0	0	1	0	0	0	0	0	0	0	0	1	0	0	0	0	0	0	0	0	1	3.5	3.5	3.5	55.594	509	509;617	0	2.3227
Q9JHU4	Q9JHU4	1	1	1	Cytoplasmic dynein 1 heavy chain 1	Dync1h1		1	1	1	1	0	0	0	0	0	0	0	0	1	0	0	0	0	0	0	0	0	1	0	0	0	0	0	0	0	0	1	0.5	0.5	0.5	532.04	4644	4644	0.0063425	1.3071
Q0VAV1;Q80Z18;F8WIM6;A0A087WR59;Q80T03	Q0VAV1;Q80Z18;F8WIM6;A0A087WR59;Q80T03	1;1;1;1;1	1;1;1;1;1	1;1;1;1;1	Mucin-6	Muc6	;;;;	5	1	1	1	0	0	0	0	0	0	0	0	1	0	0	0	0	0	0	0	0	1	0	0	0	0	0	0	0	0	1	0.7	0.7	0.7	156.89	1437	1437;1674;2853;2918;2850	1	-2
A0A140LJ62;Q6GQT2;Q9JJR9	A0A140LJ62;Q6GQT2;Q9JJR9	1;1;1	1;1;1	1;1;1	Nuclear receptor-interacting protein 3	Nrip3	;;	3	1	1	1	0	0	0	0	0	0	0	0	1	0	0	0	0	0	0	0	0	1	0	0	0	0	0	0	0	0	1	15.7	15.7	15.7	10.215	89	89;251;240	1	-2
Q3UBL3;B7ZCU2;B7ZCU5;Q3UAH6;Q3TPY5;Q3TMI0;Q6AXD3;B7ZCU4;B7ZCU3;Q3TJR5;Q3TJ64;B7ZCU0;J3QNK8;Q8CBW3-5;Q8CBW3-2;Q8CBW3-4;Q8CBW3-3;Q8CBW3	Q3UBL3;B7ZCU2;B7ZCU5;Q3UAH6;Q3TPY5;Q3TMI0;Q6AXD3;B7ZCU4;B7ZCU3;Q3TJR5;Q3TJ64;B7ZCU0;J3QNK8;Q8CBW3-5;Q8CBW3-2;Q8CBW3-4;Q8CBW3-3;Q8CBW3	1;1;1;1;1;1;1;1;1;1;1;1;1;1;1;1;1;1	1;1;1;1;1;1;1;1;1;1;1;1;1;1;1;1;1;1	1;1;1;1;1;1;1;1;1;1;1;1;1;1;1;1;1;1	Abl interactor 1	Abi1	;;;;;;;;;;;;;;;;;	18	1	1	1	0	0	0	0	0	0	0	0	1	0	0	0	0	0	0	0	0	1	0	0	0	0	0	0	0	0	1	4	4	4	34.613	323	323;393;422;446;446;446;450;451;452;475;476;480;481;388;446;475;476;481	1	-2
B9EI00	B9EI00	1	1	1		Calm5		1	1	1	1	0	0	0	0	0	0	0	0	1	0	0	0	0	0	0	0	0	1	0	0	0	0	0	0	0	0	1	13.1	13.1	13.1	17.62	153	153	1	-2
D3YYM6;Q91V55	D3YYM6;Q91V55	1;1	1;1	1;1		Rps5	;	2	1	1	1	0	0	0	0	0	0	0	0	1	0	0	0	0	0	0	0	0	1	0	0	0	0	0	0	0	0	1	8.2	8.2	8.2	20.413	182	182;204	0	4.4596
D3Z7C6;Q9CRH1;Q3TJG6;Q9R0Q7	D3Z7C6;Q9CRH1;Q3TJG6;Q9R0Q7	1;1;1;1	1;1;1;1	1;1;1;1	Prostaglandin E synthase 3	Ptges3	;;;	4	1	1	1	0	0	0	0	0	0	0	0	1	0	0	0	0	0	0	0	0	1	0	0	0	0	0	0	0	0	1	10	10	10	14.982	130	130;140;160;160	0.0065502	1.4704
Q2NKI2	Q2NKI2	1	1	1	Ventral anterior homeobox 1	Vax1		1	1	1	1	0	0	0	0	0	0	0	0	1	0	0	0	0	0	0	0	0	1	0	0	0	0	0	0	0	0	1	6.5	6.5	6.5	35.166	338	338	1	-2
Q6A075	Q6A075	1	1	1		Gas7		1	1	1	1	0	0	0	0	0	0	0	0	1	0	0	0	0	0	0	0	0	1	0	0	0	0	0	0	0	0	1	4.3	4.3	4.3	40.715	351	351	1	-2
Q9CQU1	Q9CQU1	1	1	1	Microfibrillar-associated protein 1	Mfap1		1	1	1	1	0	0	0	0	0	0	0	0	1	0	0	0	0	0	0	0	0	1	0	0	0	0	0	0	0	0	1	2.3	2.3	2.3	51.954	439	439	1	-2
Q3U5I8;Q8QZY7;O35375-5;O35375-6;O35375-2;O35375-3;O35375-4;O35375	Q3U5I8;Q8QZY7;O35375-5;O35375-6;O35375-2;O35375-3;O35375-4;O35375	1;1;1;1;1;1;1;1	1;1;1;1;1;1;1;1	1;1;1;1;1;1;1;1	Neuropilin-2	Nrp2	;;;;;;;	8	1	1	1	0	0	0	0	1	0	1	1	0	0	0	0	0	1	0	1	1	0	0	0	0	0	1	0	1	1	0	2.1	2.1	2.1	101.42	901	901;926;901;906;909;914;926;931	0.0066519	1.5377
F6YZH6;Q3TV27;P56476;P56476-2	F6YZH6;Q3TV27;P56476;P56476-2	1;1;1;1	1;1;1;1	1;1;1;1	Gamma-aminobutyric acid receptor subunit rho-2	Gabrr2	;;;	4	1	1	1	0	0	0	0	1	0	1	1	0	0	0	0	0	1	0	1	1	0	0	0	0	0	1	0	1	1	0	13.1	13.1	13.1	25.872	221	221;362;465;490	0.0080645	1.193
Q91XI2;Q542K4;Q3TVZ1;A2AL20;Q8C6E3;Q3UZE7;P24270	Q91XI2;Q542K4;Q3TVZ1;A2AL20;Q8C6E3;Q3UZE7;P24270	2;2;2;1;1;1;1	2;2;2;1;1;1;1	2;2;2;1;1;1;1	Catalase	Cat	;;;;;;	7	2	2	2	0	0	0	1	0	2	0	1	0	0	0	0	1	0	2	0	1	0	0	0	0	1	0	2	0	1	0	6.5	6.5	6.5	59.738	527	527;527;527;176;527;527;527	0	4.3119
Q80TA9	Q80TA9	1	1	1	Ectopic P granules protein 5 homolog	Epg5		1	1	1	1	1	1	1	0	0	1	0	1	0	1	1	1	0	0	1	0	1	0	1	1	1	0	0	1	0	1	0	0.5	0.5	0.5	290.8	2572	2572	0.0080321	1.182	By matching	By matching	By matching
A0A0G2JDL9;Q52L50;Q3U7U8;C5H0E9;C5H0E8;Q99JI6;P62835	A0A0G2JDL9;Q52L50;Q3U7U8;C5H0E9;C5H0E8;Q99JI6;P62835	1;1;1;1;1;1;1	1;1;1;1;1;1;1	1;1;1;1;1;1;1	Ras-related protein Rap-1b;Ras-related protein Rap-1A	Rap1b;Rap1a;Gm9392	;;;;;;	7	1	1	1	0	0	0	1	1	0	1	1	0	0	0	0	1	1	0	1	1	0	0	0	0	1	1	0	1	1	0	10.2	10.2	10.2	13.426	118	118;184;184;184;184;184;184	0	2.3352
Q920Q2	Q920Q2	1	1	1	DNA repair protein REV1	Rev1		1	1	1	1	0	0	1	0	1	0	1	1	0	0	0	1	0	1	0	1	1	0	0	0	1	0	1	0	1	1	0	1.2	1.2	1.2	137.34	1249	1249	1	-2			By MS/MS
Q5UCA9;Q8C7E4;Q8C663;Q6NXX2;Q9JJH1	Q5UCA9;Q8C7E4;Q8C663;Q6NXX2;Q9JJH1	2;2;2;2;2	2;2;2;2;2	2;2;2;2;2	Ribonuclease 4	Rnase4	;;;;	5	2	2	2	0	0	0	0	0	0	1	2	0	0	0	0	0	0	0	1	2	0	0	0	0	0	0	0	1	2	0	20.4	20.4	20.4	16.921	147	147;148;148;148;148	0	6.3522
Q3U9M7;Q3U6Z1;Q3U6N7;Q3TJX0;Q61233	Q3U9M7;Q3U6Z1;Q3U6N7;Q3TJX0;Q61233	1;1;1;1;1	1;1;1;1;1	1;1;1;1;1	Plastin-2	Lcp1	;;;;	5	1	1	1	0	0	0	0	0	0	1	1	0	0	0	0	0	0	0	1	1	0	0	0	0	0	0	0	1	1	0	2.7	2.7	2.7	70.191	627	627;627;627;627;627	0.0098039	1.0824
O88200	O88200	1	1	1	C-type lectin domain family 11 member A	Clec11a		1	1	1	1	0	0	0	1	1	0	1	1	0	0	0	0	1	1	0	1	1	0	0	0	0	1	1	0	1	1	0	5.2	5.2	5.2	36.451	328	328	0	3.6272
D3Z3A9;D3Z7T1;Q8BH97	D3Z3A9;D3Z7T1;Q8BH97	2;2;2	2;2;2	2;2;2	Reticulocalbin-3	Rcn3	;;	3	2	2	2	0	0	0	0	2	0	1	1	0	0	0	0	0	2	0	1	1	0	0	0	0	0	2	0	1	1	0	8.4	8.4	8.4	31.843	274	274;280;328	0	3.4971
Q8CE18;Q8VDK4;Q9WTR5;Q8BS79	Q8CE18;Q8VDK4;Q9WTR5;Q8BS79	2;2;2;1	2;2;2;1	2;2;2;1	Cadherin-13	Cdh13	;;;	4	2	2	2	0	0	0	0	2	0	1	1	0	0	0	0	0	2	0	1	1	0	0	0	0	0	2	0	1	1	0	14.5	14.5	14.5	41.941	379	379;714;714;286	0	10.716
B7ZWL9;B2RXT5;P06745	B7ZWL9;B2RXT5;P06745	2;2;2	1;1;1	1;1;1	Glucose-6-phosphate isomerase	Gpi1;Gpi	;;	3	2	1	1	1	0	0	0	0	1	0	1	0	0	0	0	0	0	0	0	1	0	0	0	0	0	0	0	0	1	0	9.3	4.9	4.9	38.341	344	344;344;558	0	3.0805	By matching
P40142;O55021	P40142;O55021	2;1	2;1	2;1	Transketolase	Tkt	;	2	2	2	2	1	0	0	0	0	1	0	1	0	1	0	0	0	0	1	0	1	0	1	0	0	0	0	1	0	1	0	4.2	4.2	4.2	67.63	623	623;28	0	8.0993	By MS/MS
Q4KL76;Q64433;Q9JI95	Q4KL76;Q64433;Q9JI95	4;4;3	4;4;3	4;4;3	10 kDa heat shock protein, mitochondrial	Hspe1;Cpn10-rs1	;;	3	4	4	4	4	0	0	0	0	3	0	1	0	4	0	0	0	0	3	0	1	0	4	0	0	0	0	3	0	1	0	40.2	40.2	40.2	10.963	102	102;102;102	0	7.0262	By MS/MS
Q8BKE0;Q9CZ58;Q3UWT6;P49722	Q8BKE0;Q9CZ58;Q3UWT6;P49722	2;2;2;2	2;2;2;2	2;2;2;2	Proteasome subunit alpha type;Proteasome subunit alpha type-2	Psma2	;;;	4	2	2	2	1	1	1	2	0	1	0	2	0	1	1	1	2	0	1	0	2	0	1	1	1	2	0	1	0	2	0	16.4	16.4	16.4	20.786	183	183;234;247;234	0	3.8612	By matching	By MS/MS	By MS/MS
Q80WS3	Q80WS3	1	1	1	rRNA/tRNA 2-O-methyltransferase fibrillarin-like protein 1	Fbll1		1	1	1	1	1	0	1	0	1	0	0	1	0	1	0	1	0	1	0	0	1	0	1	0	1	0	1	0	0	1	0	2.2	2.2	2.2	33.338	314	314	1	-2	By MS/MS		By MS/MS
E0CXN0;Q91XG8;Q3UZ05;P26928	E0CXN0;Q91XG8;Q3UZ05;P26928	1;1;1;1	1;1;1;1	1;1;1;1	Hepatocyte growth factor-like protein;Hepatocyte growth factor-like protein alpha chain;Hepatocyte growth factor-like protein beta chain	Mst1	;;;	4	1	1	1	0	0	0	0	1	0	0	1	0	0	0	0	0	1	0	0	1	0	0	0	0	0	1	0	0	1	0	2	2	2	79.714	707	707;716;716;716	0	6.8786
Q91Z61	Q91Z61	1	1	1	GTP-binding protein Di-Ras1	Diras1		1	1	1	1	1	1	1	0	0	0	0	1	0	1	1	1	0	0	0	0	1	0	1	1	1	0	0	0	0	1	0	5.1	5.1	5.1	22.264	198	198	0.0099404	1.142	By matching	By MS/MS	By MS/MS
Q3URM4;Q9D1Q6	Q3URM4;Q9D1Q6	2;2	2;2	2;2	Endoplasmic reticulum resident protein 44	Erp44	;	2	2	2	2	1	0	0	0	0	0	0	1	0	1	0	0	0	0	0	0	1	0	1	0	0	0	0	0	0	1	0	6.7	6.7	6.7	46.746	406	406;406	0.0023641	2.0135	By MS/MS
Q60692	Q60692	1	1	1	Proteasome subunit beta type-6	Psmb6		1	1	1	1	0	0	0	0	0	0	0	1	0	0	0	0	0	0	0	0	1	0	0	0	0	0	0	0	0	1	0	16.4	16.4	16.4	25.378	238	238	0	2.1753
Q8VCZ1;Q9DD05;P10518	Q8VCZ1;Q9DD05;P10518	1;1;1	1;1;1	1;1;1	Delta-aminolevulinic acid dehydratase	Alad	;;	3	1	1	1	0	0	0	0	0	0	0	1	0	0	0	0	0	0	0	0	1	0	0	0	0	0	0	0	0	1	0	9.9	9.9	9.9	20.592	191	191;330;330	0	7.8775
E0CZ90;G3X9V0;Q5SVP3;P97372	E0CZ90;G3X9V0;Q5SVP3;P97372	1;1;1;1	1;1;1;1	1;1;1;1	Proteasome activator complex subunit 2	Psme2;PSME2b	;;;	4	1	1	1	0	0	0	0	0	0	0	1	0	0	0	0	0	0	0	0	1	0	0	0	0	0	0	0	0	1	0	13.3	13.3	13.3	18.679	165	165;231;239;239	0	4.2139
G5E839;Q564F4;Q3UJZ8;Q3TII0;P80315	G5E839;Q564F4;Q3UJZ8;Q3TII0;P80315	1;1;1;1;1	1;1;1;1;1	1;1;1;1;1	T-complex protein 1 subunit delta	Cct4	;;;;	5	1	1	1	0	0	0	0	0	0	0	1	0	0	0	0	0	0	0	0	1	0	0	0	0	0	0	0	0	1	0	5.7	5.7	5.7	54.861	509	509;539;539;539;539	0.0023202	1.8884
Q3UKN6;P81117	Q3UKN6;P81117	1;1	1;1	1;1	Nucleobindin-2;Nesfatin-1	Nucb2	;	2	1	1	1	0	0	0	0	0	0	0	1	0	0	0	0	0	0	0	0	1	0	0	0	0	0	0	0	0	1	0	5	5	5	50.353	420	420;420	0	14.004
Q6IRU2	Q6IRU2	2	2	2	Tropomyosin alpha-4 chain	Tpm4		1	2	2	2	0	0	0	0	0	0	0	2	0	0	0	0	0	0	0	0	2	0	0	0	0	0	0	0	0	2	0	12.1	12.1	12.1	28.467	248	248	0	4.5227
Q5NCU4;Q5NCU5;Q3TXI6;P07214	Q5NCU4;Q5NCU5;Q3TXI6;P07214	2;2;2;2	2;2;2;2	2;2;2;2	SPARC	Sparc	;;;	4	2	2	2	1	0	1	0	1	1	1	0	0	1	0	1	0	1	1	1	0	0	1	0	1	0	1	1	1	0	0	8	8	8	34.322	301	301;302;302;302	0	7.2669	By matching		By MS/MS
Q8K2T2;Q8C6G3;W0UVC3;P00683	Q8K2T2;Q8C6G3;W0UVC3;P00683	2;2;2;2	2;2;2;2	2;2;2;2	Ribonuclease pancreatic	Rnase1;Rac1	;;;	4	2	2	2	1	0	0	2	1	2	1	0	0	1	0	0	2	1	2	1	0	0	1	0	0	2	1	2	1	0	0	18.1	18.1	18.1	16.804	149	149;149;191;149	0.0023041	1.8767	By matching
Q99KE8-3;A2AQR4	Q99KE8-3;A2AQR4	1;1	1;1	1;1		Zfp64	;	2	1	1	1	1	0	1	0	1	1	1	0	0	1	0	1	0	1	1	1	0	0	1	0	1	0	1	1	1	0	0	2.7	2.7	2.7	53.316	473	473;676	0	2.7051	By MS/MS		By MS/MS
Q3V0F6	Q3V0F6	2	2	2		Gm7337		1	2	2	2	1	1	1	1	0	1	1	0	0	1	1	1	1	0	1	1	0	0	1	1	1	1	0	1	1	0	0	9.9	9.9	9.9	44.925	385	385	1	-2	By matching	By MS/MS	By matching
A0A140LIN9;Q8BW94-2;Q8BW94	A0A140LIN9;Q8BW94-2;Q8BW94	1;1;1	1;1;1	1;1;1	Dynein heavy chain 3, axonemal	Dnah3	;;	3	1	1	1	0	0	0	1	1	0	1	0	0	0	0	0	1	1	0	1	0	0	0	0	0	1	1	0	1	0	0	0.4	0.4	0.4	382.62	3351	3351;3957;4083	0.0098425	1.1025
Q9QYL3;Q9QYL4	Q9QYL3;Q9QYL4	1;1	1;1	1;1		Cadm1	;	2	1	1	1	0	0	0	0	1	0	1	0	0	0	0	0	0	1	0	1	0	0	0	0	0	0	1	0	1	0	0	8.6	8.6	8.6	30.636	278	278;306	0	7.5291
Q3UWH4;P33174	Q3UWH4;P33174	1;1	1;1	1;1	Chromosome-associated kinesin KIF4	Kif4	;	2	1	1	1	0	0	0	0	1	0	1	0	0	0	0	0	0	1	0	1	0	0	0	0	0	0	1	0	1	0	0	4.9	4.9	4.9	50.626	446	446;1231	1	-2
Q8R593	Q8R593	1	1	1		Rchy1		1	1	1	1	0	1	1	1	1	0	1	0	0	0	1	1	1	1	0	1	0	0	0	1	1	1	1	0	1	0	0	3.8	3.8	3.8	29.988	261	261	0.0060852	1.2024		By matching	By MS/MS
Q61595-2;Q61595-12;Q61595-16;Q61595-3;Q61595-14;Q61595-6;Q61595-4;Q61595-9;Q61595-8;Q61595-13;Q61595-5;Q61595-15;Q61595-10;Q61595-7;Q61595-11;Q61595	Q61595-2;Q61595-12;Q61595-16;Q61595-3;Q61595-14;Q61595-6;Q61595-4;Q61595-9;Q61595-8;Q61595-13;Q61595-5;Q61595-15;Q61595-10;Q61595-7;Q61595-11;Q61595	1;1;1;1;1;1;1;1;1;1;1;1;1;1;1;1	1;1;1;1;1;1;1;1;1;1;1;1;1;1;1;1	1;1;1;1;1;1;1;1;1;1;1;1;1;1;1;1	Kinectin	Ktn1	;;;;;;;;;;;;;;;	16	1	1	1	0	0	0	1	1	0	1	0	0	0	0	0	1	1	0	1	0	0	0	0	0	1	1	0	1	0	0	1.7	1.7	1.7	137.68	1200	1200;1223;1224;1228;1229;1247;1247;1252;1252;1253;1275;1275;1275;1280;1304;1327	1	-2
A2ASS6-3;F7CR78	A2ASS6-3;F7CR78	2;1	2;1	1;0	Titin	Ttn	;	2	2	2	1	0	1	2	1	1	0	1	0	0	0	1	2	1	1	0	1	0	0	0	1	1	1	1	0	1	0	0	0.5	0.5	0.3	619.32	5508	5508;8272	0.0063158	1.2957		By MS/MS	By MS/MS
Q8K441	Q8K441	1	1	1	ATP-binding cassette sub-family A member 6	Abca6		1	1	1	1	0	0	0	1	1	0	1	0	0	0	0	0	1	1	0	1	0	0	0	0	0	1	1	0	1	0	0	0.8	0.8	0.8	183.28	1624	1624	0.0064655	1.3771
E9Q8N1;E9Q8K5;A2ASS6-2;A2ASS6	E9Q8N1;E9Q8K5;A2ASS6-2;A2ASS6	2;2;2;2	1;1;1;1	1;1;1;1	Titin	Ttn	;;;	4	2	1	1	0	1	1	0	1	0	1	0	0	0	1	0	0	1	0	1	0	0	0	1	0	0	1	0	1	0	0	0.1	0	0	3716	33467	33467;33467;26886;35213	1	-2		By matching	By matching
B1AYQ0;Q3TFN7;A2AUR7;Q9D031;Q01730	B1AYQ0;Q3TFN7;A2AUR7;Q9D031;Q01730	1;1;1;1;1	1;1;1;1;1	1;1;1;1;1	Ras suppressor protein 1	Rsu1	;;;;	5	1	1	1	0	0	0	0	1	0	1	0	0	0	0	0	0	1	0	1	0	0	0	0	0	0	1	0	1	0	0	21.4	21.4	21.4	12.635	112	112;248;260;277;277	0	3.2666
Q91Y47	Q91Y47	1	1	1	Coagulation factor XI;Coagulation factor XIa heavy chain;Coagulation factor XIa light chain	F11		1	1	1	1	0	0	0	0	1	0	1	0	0	0	0	0	0	1	0	1	0	0	0	0	0	0	1	0	1	0	0	1.8	1.8	1.8	69.788	624	624	0.0044743	1.6223
Q4KMM5;Q3UZG0;Q3TIZ8;Q91XA2	Q4KMM5;Q3UZG0;Q3TIZ8;Q91XA2	1;1;1;1	1;1;1;1	1;1;1;1	Golgi membrane protein 1	Golm1	;;;	4	1	1	1	0	0	0	0	1	0	1	0	0	0	0	0	0	1	0	1	0	0	0	0	0	0	1	0	1	0	0	2.5	2.5	2.5	44.357	393	393;393;393;393	0	15.151
Q3UD72;Q3TTL2;Q8BU22;Q922S8	Q3UD72;Q3TTL2;Q8BU22;Q922S8	1;1;1;1	1;1;1;1	1;1;1;1	Kinesin-like protein;Kinesin-like protein KIF2C	Kif2c	;;;	4	1	1	1	0	0	0	0	1	0	1	0	0	0	0	0	0	1	0	1	0	0	0	0	0	0	1	0	1	0	0	2.9	2.9	2.9	61.344	546	546;670;721;721	0.0096899	1.0498
Q9WVL5	Q9WVL5	1	1	1	MORC family CW-type zinc finger protein 1	Morc1		1	1	1	1	0	0	0	0	1	0	1	0	0	0	0	0	0	1	0	1	0	0	0	0	0	0	1	0	1	0	0	1.8	1.8	1.8	108.31	950	950	1	-2
Q3UNQ4;Q3U0K4;E9QNW6;Q8VDG7	Q3UNQ4;Q3U0K4;E9QNW6;Q8VDG7	1;1;1;1	1;1;1;1	1;1;1;1	Platelet-activating factor acetylhydrolase 2, cytoplasmic	Pafah2	;;;	4	1	1	1	0	0	1	0	0	0	1	0	0	0	0	1	0	0	0	1	0	0	0	0	1	0	0	0	1	0	0	2.8	2.8	2.8	43.455	390	390;390;415;390	1	-2			By MS/MS
Q3UIK3	Q3UIK3	1	1	1	Signal recognition particle 9 kDa protein	Srp9		1	1	1	1	0	0	0	0	0	0	1	0	0	0	0	0	0	0	0	1	0	0	0	0	0	0	0	0	1	0	0	12.8	12.8	12.8	10.203	86	86	1	-2
Q8BH35-2;Q8BH35	Q8BH35-2;Q8BH35	1;1	1;1	1;1	Complement component C8 beta chain	C8b	;	2	1	1	1	0	0	0	0	0	0	1	0	0	0	0	0	0	0	0	1	0	0	0	0	0	0	0	0	1	0	0	2.1	2.1	2.1	58.449	523	523;589	0	7.4177
F6UV57	F6UV57	1	1	1		Slmap		1	1	1	1	0	0	0	0	0	0	1	0	0	0	0	0	0	0	0	1	0	0	0	0	0	0	0	0	1	0	0	5.5	5.5	5.5	50.103	433	433	1	-2
J3QM38	J3QM38	1	1	1		Gm4944		1	1	1	1	0	0	0	0	0	0	1	0	0	0	0	0	0	0	0	1	0	0	0	0	0	0	0	0	1	0	0	1.8	1.8	1.8	77.43	661	661	1	-2
Q8BTX5;Q5M9L0;Q3TIK5;Q3TII2;Q3THW7;Q91WK2	Q8BTX5;Q5M9L0;Q3TIK5;Q3TII2;Q3THW7;Q91WK2	1;1;1;1;1;1	1;1;1;1;1;1	1;1;1;1;1;1	Eukaryotic translation initiation factor 3 subunit H	Eif3h	;;;;;	6	1	1	1	0	0	0	0	0	0	1	0	0	0	0	0	0	0	0	1	0	0	0	0	0	0	0	0	1	0	0	8	8	8	39.846	352	352;352;352;352;352;352	1	-2
Q501L5;O35103;Q8C7G2	Q501L5;O35103	3;3;1	3;3;1	3;3;1	Osteomodulin	Omd	;	3	3	3	3	1	0	2	0	2	1	0	0	0	1	0	2	0	2	1	0	0	0	1	0	2	0	2	1	0	0	0	5.9	5.9	5.9	49.729	423	423;423;209	0.0096339	1.0401	By matching		By MS/MS
Q3TE53;Q3UHP6;P59672;P59672-2	Q3TE53;Q3UHP6;P59672;P59672-2	1;1;1;1	1;1;1;1	1;1;1;1	Ankyrin repeat and SAM domain-containing protein 1A	Anks1;Anks1a	;;;	4	1	1	1	1	0	0	1	0	1	0	0	0	1	0	0	1	0	1	0	0	0	1	0	0	1	0	1	0	0	0	2.6	2.6	2.6	55.056	494	494;1189;1150;1168	1	-2	By MS/MS
Q3UN37;B2RVF4;H3BKF1;E9PYM1;E9Q0Z5;D3YWC7	Q3UN37;B2RVF4;H3BKF1;E9PYM1;E9Q0Z5;D3YWC7	1;1;1;1;1;1	1;1;1;1;1;1	1;1;1;1;1;1		Fam47e	;;;;;	6	1	1	1	1	1	1	1	0	1	0	0	0	1	1	1	1	0	1	0	0	0	1	1	1	1	0	1	0	0	0	9.9	9.9	9.9	11.797	101	101;101;121;199;260;402	1	-2	By matching	By matching	By MS/MS
G3X9K3	G3X9K3	1	1	1	Brefeldin A-inhibited guanine nucleotide-exchange protein 1	Arfgef1		1	1	1	1	1	1	1	1	0	1	0	0	0	1	1	1	1	0	1	0	0	0	1	1	1	1	0	1	0	0	0	0.8	0.8	0.8	208.5	1846	1846	1	-2	By MS/MS	By MS/MS	By MS/MS
G3UWN9;G3UXY0;G3X9K9;G3UXZ5;Q5HZK3;P97371	G3UWN9;G3UXY0;G3X9K9;G3UXZ5;Q5HZK3;P97371	1;1;1;1;1;1	1;1;1;1;1;1	1;1;1;1;1;1	Proteasome activator complex subunit 1	Psme1	;;;;;	6	1	1	1	1	1	1	0	0	1	0	0	0	1	1	1	0	0	1	0	0	0	1	1	1	0	0	1	0	0	0	6.9	6.9	6.9	19.774	173	173;226;236;238;249;249	0.009901	1.1311	By MS/MS	By matching	By matching
Q3TGB1;Q9CQ26	Q3TGB1;Q9CQ26	1;1	1;1	1;1	STAM-binding protein	Stambp	;	2	1	1	1	1	1	1	0	0	1	0	0	0	1	1	1	0	0	1	0	0	0	1	1	1	0	0	1	0	0	0	3.3	3.3	3.3	48.553	424	424;424	1	-2	By MS/MS	By matching	By matching
D3Z6F5;Q03265;Q3U452;D6RJ16	D3Z6F5;Q03265	7;7;3;1	7;7;3;1	7;7;3;1	ATP synthase subunit alpha;ATP synthase subunit alpha, mitochondrial	Atp5a1	;	4	7	7	7	7	0	1	0	0	3	0	0	0	7	0	1	0	0	3	0	0	0	7	0	1	0	0	3	0	0	0	15.7	15.7	15.7	54.594	503	503;553;509;89	0	16.618	By MS/MS		By matching
K3W4N7;A0A0R4J1M7;Q9JJV9-2;Q9JJV9	K3W4N7;A0A0R4J1M7;Q9JJV9-2;Q9JJV9	1;1;1;1	1;1;1;1	1;1;1;1	Sodium channel protein;Sodium channel protein type 5 subunit alpha	Scn5a	;;;	4	1	1	1	1	0	1	0	0	1	0	0	0	1	0	1	0	0	1	0	0	0	1	0	1	0	0	1	0	0	0	0.9	0.9	0.9	227.7	2020	2020;2020;2019;2019	1	-2	By MS/MS		By matching
Q642K0;Q60605-2;Q60605;Q3TIG9;Q8CI43	Q642K0;Q60605-2;Q60605;Q3TIG9;Q8CI43	2;2;2;1;1	2;2;2;1;1	2;2;2;1;1	Myosin light polypeptide 6;Myosin light chain 6B	Myl6;Myl6b	;;;;	5	2	2	2	2	0	0	0	0	1	0	0	0	2	0	0	0	0	1	0	0	0	2	0	0	0	0	1	0	0	0	17.2	17.2	17.2	16.961	151	151;151;151;105;207	0.0066667	1.5536	By MS/MS
Q497D7;Q5PR15;Q58DZ3;P62889	Q497D7;Q5PR15;Q58DZ3;P62889	2;2;2;2	2;2;2;2	2;2;2;2	60S ribosomal protein L30	Rpl30	;;;	4	2	2	2	2	0	0	0	0	2	0	0	0	2	0	0	0	0	2	0	0	0	2	0	0	0	0	2	0	0	0	24.6	24.6	24.6	12.656	114	114;115;115;115	0	3.8373	By MS/MS
Q78IK2	Q78IK2	1	1	1	Up-regulated during skeletal muscle growth protein 5	Usmg5		1	1	1	1	1	0	0	0	0	1	0	0	0	1	0	0	0	0	1	0	0	0	1	0	0	0	0	1	0	0	0	25.9	25.9	25.9	6.3814	58	58	0.0066815	1.5608	By MS/MS
Q545A2;P51881;Q8BVI9;P48962;B2RTC8;Q3V132	Q545A2;P51881;Q8BVI9;P48962	5;5;4;4;2;2	5;5;4;4;2;2	5;5;4;4;2;2	ADP/ATP translocase 2;ADP/ATP translocase 2, N-terminally processed;ADP/ATP translocase 1	Slc25a5;Slc25a4	;;;	6	5	5	5	5	0	0	0	0	3	0	0	0	5	0	0	0	0	3	0	0	0	5	0	0	0	0	3	0	0	0	14.8	14.8	14.8	32.931	298	298;298;298;298;320;320	0	2.3877	By MS/MS
Q5SUC3;Q3TXE5;P35564	Q5SUC3;Q3TXE5;P35564	4;4;4	4;4;4	4;4;4	Calnexin	Canx	;;	3	4	4	4	4	0	0	0	0	2	0	0	0	4	0	0	0	0	2	0	0	0	4	0	0	0	0	2	0	0	0	9.3	9.3	9.3	67.277	591	591;591;591	0	5.0712	By MS/MS
F6WHQ7;A2AE89;P10649	F6WHQ7;A2AE89;P10649	1;1;1	1;1;1	1;1;1	Glutathione S-transferase Mu 1	Gstm1	;;	3	1	1	1	1	0	0	0	0	1	0	0	0	1	0	0	0	0	1	0	0	0	1	0	0	0	0	1	0	0	0	6.2	6.2	6.2	22.587	194	194;244;218	0.0023419	1.9545	By MS/MS
Q99KI0	Q99KI0	8	8	8	Aconitate hydratase, mitochondrial	Aco2		1	8	8	8	8	0	0	0	0	4	0	0	0	8	0	0	0	0	4	0	0	0	8	0	0	0	0	4	0	0	0	11.3	11.3	11.3	85.462	780	780	0	14.156	By MS/MS
Q58EA6;P62852	Q58EA6;P62852	2;2	2;2	2;2	40S ribosomal protein S25	Rps25	;	2	2	2	2	2	0	0	0	0	1	0	0	0	2	0	0	0	0	1	0	0	0	2	0	0	0	0	1	0	0	0	14.4	14.4	14.4	13.742	125	125;125	0.0064103	1.3397	By MS/MS
P63038;D3Z7J9;D3Z2F2;P63038-2	P63038	4;1;1;1	4;1;1;1	4;1;1;1	60 kDa heat shock protein, mitochondrial	Hspd1		4	4	4	4	4	0	0	0	0	3	0	0	0	4	0	0	0	0	3	0	0	0	4	0	0	0	0	3	0	0	0	12.7	12.7	12.7	60.955	573	573;142;202;258	0	9.3663	By MS/MS
A0A097PUG1;A0A097PUH2	A0A097PUG1;A0A097PUH2	3;3	3;3	3;3			;	2	3	3	3	3	0	0	0	0	1	0	0	0	3	0	0	0	0	1	0	0	0	3	0	0	0	0	1	0	0	0	6.6	6.6	6.6	51.332	468	468;469	0	6.2638	By MS/MS
P05201	P05201	1	1	1	Aspartate aminotransferase, cytoplasmic	Got1		1	1	1	1	1	0	0	0	0	1	0	0	0	1	0	0	0	0	1	0	0	0	1	0	0	0	0	1	0	0	0	3.1	3.1	3.1	46.247	413	413	0	2.3028	By MS/MS
Q9CRJ5;Q3UJU6;Q9CQW4;Q3UA25;Q5M9L9;Q497E9;P62242	Q9CRJ5;Q3UJU6;Q9CQW4;Q3UA25;Q5M9L9;Q497E9;P62242	1;1;1;1;1;1;1	1;1;1;1;1;1;1	1;1;1;1;1;1;1	40S ribosomal protein S8	Rps8	;;;;;;	7	1	1	1	1	0	0	0	0	1	0	0	0	1	0	0	0	0	1	0	0	0	1	0	0	0	0	1	0	0	0	11	11	11	15.881	136	136;142;150;152;208;208;208	0.0022883	1.8289	By MS/MS
P54071	P54071	3	3	2	Isocitrate dehydrogenase [NADP], mitochondrial	Idh2		1	3	3	2	3	0	0	0	0	2	0	0	0	3	0	0	0	0	2	0	0	0	2	0	0	0	0	1	0	0	0	7.3	7.3	5.3	50.906	452	452	0	3.5489	By MS/MS
Q4KML8;A0A0R4IZW5;P09803	Q4KML8;A0A0R4IZW5;P09803	1;1;1	1;1;1	1;1;1	Cadherin-1;E-Cad/CTF1;E-Cad/CTF2;E-Cad/CTF3	Cdh1	;;	3	1	1	1	1	0	0	0	0	1	0	0	0	1	0	0	0	0	1	0	0	0	1	0	0	0	0	1	0	0	0	1.6	1.6	1.6	98.255	884	884;884;884	0	3.1917	By MS/MS
O54994;J3KMM5;Q5DTI2;O55143-2;O55143;Q8R429	O54994;J3KMM5;Q5DTI2;O55143-2;O55143;Q8R429	4;4;4;4;4;2	4;4;4;4;4;2	2;2;2;2;2;1	Calcium-transporting ATPase;Sarcoplasmic/endoplasmic reticulum calcium ATPase 2;Sarcoplasmic/endoplasmic reticulum calcium ATPase 1	Atp2a2;Atp2a1	;;;;;	6	4	4	2	4	0	0	0	0	2	0	0	0	4	0	0	0	0	2	0	0	0	2	0	0	0	0	0	0	0	0	12.5	12.5	6	55.16	502	502;1044;1061;998;1044;994	0	8.6491	By MS/MS
A0A087WS46;O70251;M0QWK5;M0QWH8;G3UX43;G3UZ47	A0A087WS46;O70251;M0QWK5;M0QWH8;G3UX43;G3UZ47	2;2;1;1;1;1	2;2;1;1;1;1	2;2;1;1;1;1	Elongation factor 1-beta	Eef1b2;Eef1b	;;;;;	6	2	2	2	2	0	0	0	0	1	0	0	0	2	0	0	0	0	1	0	0	0	2	0	0	0	0	1	0	0	0	17.9	17.9	17.9	20.136	184	184;225;43;48;68;94	0	6.5897	By MS/MS
Q3TQP7;Q8QZT1	Q3TQP7;Q8QZT1	1;1	1;1	1;1	Acetyl-CoA acetyltransferase, mitochondrial	Acat1	;	2	1	1	1	1	0	0	0	0	1	0	0	0	1	0	0	0	0	1	0	0	0	1	0	0	0	0	1	0	0	0	3.1	3.1	3.1	44.802	424	424;424	0.0065646	1.482	By MS/MS
Q4FK57;Q4FJZ3;Q8R180;Q3TXL0	Q4FK57;Q4FJZ3;Q8R180;Q3TXL0	2;2;2;1	1;1;1;1	1;1;1;1	ERO1-like protein alpha	Ero1l	;;;	4	2	1	1	2	0	0	0	0	1	0	0	0	1	0	0	0	0	0	0	0	0	1	0	0	0	0	0	0	0	0	5.4	3	3	54.084	464	464;464;464;222	0.0062112	1.2545	By MS/MS
Q8CJ40-2;Q8CJ40-3;Q8CJ40	Q8CJ40-2;Q8CJ40-3;Q8CJ40	1;1;1	1;1;1	1;1;1	Rootletin	Crocc	;;	3	1	1	1	1	0	0	0	0	1	0	0	0	1	0	0	0	0	1	0	0	0	1	0	0	0	0	1	0	0	0	0.8	0.8	0.8	208.27	1845	1845;1988;2009	0	2.3883	By MS/MS
Q8C6F9;Q3TV26;P43137	Q8C6F9;Q3TV26;P43137	5;5;5	5;5;5	5;5;5	Lithostathine-1	Reg1	;;	3	5	5	5	5	1	3	2	1	5	0	0	0	5	1	3	2	1	5	0	0	0	5	1	3	2	1	5	0	0	0	45.2	45.2	45.2	14.34	126	126;165;165	0	32.842	By MS/MS	By MS/MS	By MS/MS
Q7TPZ8	Q7TPZ8	14	13	13	Carboxypeptidase A1	Cpa1		1	14	13	13	10	6	7	6	1	12	0	0	0	9	6	6	6	1	12	0	0	0	9	6	6	6	1	12	0	0	0	41.3	39.4	39.4	47.384	419	419	0	37.037	By MS/MS	By MS/MS	By MS/MS
Q9ER05;Q9D7P8;Q9D960;Q9DC82	Q9ER05;Q9D7P8;Q9D960	7;6;6;3	7;6;6;3	7;6;6;3		Ctrl	;;	4	7	7	7	3	5	2	5	2	3	0	0	0	3	5	2	5	2	3	0	0	0	3	5	2	5	2	3	0	0	0	42.4	42.4	42.4	28.135	264	264;264;264;164	0	26.208	By MS/MS	By MS/MS	By MS/MS
A0A0N4SUN5	A0A0N4SUN5	1	1	1				1	1	1	1	0	0	0	0	1	1	0	0	0	0	0	0	0	1	1	0	0	0	0	0	0	0	1	1	0	0	0	3.7	3.7	3.7	20.991	190	190	0.0096712	1.0457
A0A097PUD0;A0A097PUG4	A0A097PUD0;A0A097PUG4	4;4	4;4	4;4			;	2	4	4	4	4	1	1	1	0	4	0	0	0	4	1	1	1	0	4	0	0	0	4	1	1	1	0	4	0	0	0	29.4	29.4	29.4	25.616	235	235;238	0	58.592	By MS/MS	By matching	By matching
A0A0B6VSQ6;P15947;A0A0U1RPN5;Q7M0B4;P15945	A0A0B6VSQ6;P15947;A0A0U1RPN5	5;5;4;2;2	5;5;4;2;2	5;5;4;2;2	Kallikrein-1	Klk1	;;	5	5	5	5	5	1	3	1	0	5	0	0	0	5	1	3	1	0	5	0	0	0	5	1	3	1	0	5	0	0	0	29.1	29.1	29.1	28.774	261	261;261;151;94;261	0	5.2884	By MS/MS	By MS/MS	By matching
Q8R016;E9PY26	Q8R016;E9PY26	2;1	2;1	2;1	Bleomycin hydrolase	Blmh	;	2	2	2	2	1	2	1	1	0	2	0	0	0	1	2	1	1	0	2	0	0	0	1	2	1	1	0	2	0	0	0	5.3	5.3	5.3	52.511	455	455;179	0	8.9551	By MS/MS	By MS/MS	By matching
A0A0R4J293;Q9JLF6	A0A0R4J293;Q9JLF6	3;3	3;3	3;3	Protein-glutamine gamma-glutamyltransferase K	Tgm1	;	2	3	3	3	2	1	1	1	0	3	0	0	0	2	1	1	1	0	3	0	0	0	2	1	1	1	0	3	0	0	0	4	4	4	89.795	815	815;815	0.0065076	1.3994	By MS/MS	By MS/MS	By matching
Q80U29;Q3TAJ6;B1AR52;F7DC70;B1AR51;P58854	Q80U29;Q3TAJ6;B1AR52;F7DC70;B1AR51;P58854	2;1;1;1;1;1	2;1;1;1;1;1	2;1;1;1;1;1	Gamma-tubulin complex component 3	mKIAA0357;Tubgcp3;Dnahc9;Dnah9	;;;;;	6	2	2	2	2	2	1	1	0	2	0	0	0	2	2	1	1	0	2	0	0	0	2	2	1	1	0	2	0	0	0	1	1	1	169.04	1471	1471;905;1957;1958;4484;905	1	-2	By MS/MS	By MS/MS	By matching
Q545V6;P60041	Q545V6;P60041	2;2	2;2	2;2	Somatostatin;Antrin;Somatostatin-28;Somatostatin-14	Sst	;	2	2	2	2	2	0	1	1	0	2	0	0	0	2	0	1	1	0	2	0	0	0	2	0	1	1	0	2	0	0	0	16.4	16.4	16.4	12.745	116	116;116	0	2.4777	By MS/MS		By matching
Q8C2K0;Q5BLK0;Q3TIQ2;P35979;Q6DI58	Q8C2K0;Q5BLK0;Q3TIQ2;P35979;Q6DI58	3;3;3;3;2	3;3;3;3;2	3;3;3;3;2	60S ribosomal protein L12	Rpl12	;;;;	5	3	3	3	3	0	1	1	0	3	0	0	0	3	0	1	1	0	3	0	0	0	3	0	1	1	0	3	0	0	0	25	25	25	17.806	164	164;165;165;165;218	0	6.6165	By MS/MS		By matching
Q0QEW9;Q642K1;Q58EW0;P35980;G3UZJ6;G3UZK4	Q0QEW9;Q642K1;Q58EW0;P35980;G3UZJ6;G3UZK4	2;2;2;2;1;1	2;2;2;2;1;1	2;2;2;2;1;1	60S ribosomal protein L18	Rpl18	;;;;;	6	2	2	2	2	1	1	1	0	2	0	0	0	2	1	1	1	0	2	0	0	0	2	1	1	1	0	2	0	0	0	14.2	14.2	14.2	19.231	169	169;188;188;188;126;136	0.0045351	1.7891	By MS/MS	By matching	By MS/MS
Q9D8U3;Q9D8Q5	Q9D8U3;Q9D8Q5	2;1	2;1	2;1	Endoplasmic reticulum resident protein 27	Erp27	;	2	2	2	2	2	0	0	1	0	2	0	0	0	2	0	0	1	0	2	0	0	0	2	0	0	1	0	2	0	0	0	12.5	12.5	12.5	30.693	272	272;107	0	3.7551	By matching
A0A0U1RPX7;A0A0R4J113;Q5MJ56;P97479-2;P97479	A0A0U1RPX7;A0A0R4J113;Q5MJ56;P97479-2;P97479	1;1;1;1;1	1;1;1;1;1	1;1;1;1;1	Unconventional myosin-VIIa	Myo7a	;;;;	5	1	1	1	1	0	0	1	0	1	0	0	0	1	0	0	1	0	1	0	0	0	1	0	0	1	0	1	0	0	0	0.7	0.7	0.7	249.53	2164	2164;2166;2172;2177;2215	1	-2	By matching
D3Z6I8;Q8C7C3;Q58E70;Q3TJ53;E9Q7Q3;D3Z2H9;Q8K0Z5;A0A0R4J1P2;E9Q5J9;P21107-2;P21107;D3YVR0;A2AIM5;S4R2U0;G5E8R0;E9Q453;G5E8R2;G5E8R1;E9Q456;E9Q455;E9Q452;Q9D1R6;Q8BSH3;Q8BP43;Q6PJ18;Q61344;Q564G1;Q545Y3;E9Q450;E9Q448;CON__Q3SX28;B7ZNL3;A2AIM4;E9Q454;Q91VH3;F8WID5;P58774-2;P58774;P58771-2;P58771	D3Z6I8;Q8C7C3;Q58E70;Q3TJ53;E9Q7Q3;D3Z2H9;Q8K0Z5;A0A0R4J1P2;E9Q5J9;P21107-2;P21107;D3YVR0;A2AIM5;S4R2U0;G5E8R0;E9Q453;G5E8R2;G5E8R1;E9Q456;E9Q455;E9Q452;Q9D1R6;Q8BSH3;Q8BP43;Q6PJ18;Q61344;Q564G1;Q545Y3;E9Q450;E9Q448;CON__Q3SX28;B7ZNL3;A2AIM4;E9Q454;Q91VH3;F8WID5;P58774-2;P58774;P58771-2;P58771	2;2;2;2;2;2;2;2;2;2;2;1;1;1;1;1;1;1;1;1;1;1;1;1;1;1;1;1;1;1;1;1;1;1;1;1;1;1;1;1	2;2;2;2;2;2;2;2;2;2;2;1;1;1;1;1;1;1;1;1;1;1;1;1;1;1;1;1;1;1;1;1;1;1;1;1;1;1;1;1	2;2;2;2;2;2;2;2;2;2;2;1;1;1;1;1;1;1;1;1;1;1;1;1;1;1;1;1;1;1;1;1;1;1;1;1;1;1;1;1	Tropomyosin alpha-3 chain;Tropomyosin beta chain;Tropomyosin alpha-1 chain	Tpm3;Tpm3-rs7;Tpm2;Tpm1	;;;;;;;;;;;;;;;;;;;;;;;;;;;;;;;;;;;;;;;	40	2	2	2	2	0	0	1	0	1	0	0	0	2	0	0	1	0	1	0	0	0	2	0	0	1	0	1	0	0	0	7.7	7.7	7.7	28.723	247	247;248;248;248;248;248;284;284;285;248;285;71;106;157;245;245;248;248;248;251;281;284;284;284;284;284;284;284;284;284;284;284;284;287;308;326;284;284;284;284	0	4.7182	By MS/MS
G3UXR9;G8JL47;B1AUR6-2;B1AUR6	G3UXR9;G8JL47;B1AUR6-2;B1AUR6	1;1;1;1	1;1;1;1	1;1;1;1	Protein MMS22-like	Mms22l	;;;	4	1	1	1	0	0	0	1	0	1	0	0	0	0	0	0	1	0	1	0	0	0	0	0	0	1	0	1	0	0	0	2	2	2	83.803	734	734;1198;963;1238	1	-2
F7A6H4;E9Q555	F7A6H4;E9Q555	2;2	2;2	2;2	E3 ubiquitin-protein ligase RNF213	Rnf213	;	2	2	2	2	2	1	1	1	0	1	0	0	0	2	1	1	1	0	1	0	0	0	2	1	1	1	0	1	0	0	0	0.6	0.6	0.6	584.78	5152	5152;5152	1	-2	By MS/MS	By matching	By matching
Q542G9;P07356;Q3UCD3;Q9CZI7;B0V2N7;B0V2N8;Q99KH3;B0V2N5	Q542G9;P07356;Q3UCD3;Q9CZI7;B0V2N7;B0V2N8;Q99KH3;B0V2N5	11;11;10;10;8;7;7;6	11;11;10;10;8;7;7;6	11;11;10;10;8;7;7;6	Annexin;Annexin A2	Anxa2	;;;;;;;	8	11	11	11	10	1	1	2	0	10	0	0	0	10	1	1	2	0	10	0	0	0	10	1	1	2	0	10	0	0	0	36.6	36.6	36.6	38.676	339	339;339;339;339;196;176;222;272	0	40.911	By MS/MS	By MS/MS	By MS/MS
F6UFG6;D3YYE1;D3Z7M9;Q64G17;O35381	F6UFG6;D3YYE1;D3Z7M9;Q64G17;O35381	3;3;3;3;3	3;3;3;3;3	3;3;3;3;3	Putative acidic leucine-rich nuclear phosphoprotein 32 family member C;Acidic leucine-rich nuclear phosphoprotein 32 family member A	Anp32a;Anp32c	;;;;	5	3	3	3	3	1	1	1	0	3	0	0	0	3	1	1	1	0	3	0	0	0	3	1	1	1	0	3	0	0	0	15.2	15.2	15.2	15.306	138	138;198;233;123;247	0	2.5859	By MS/MS	By MS/MS	By MS/MS
Q8C4K6;Q32ME9;Q2VPA9;P55849-2;P55849	Q8C4K6;Q32ME9;Q2VPA9;P55849-2;P55849	1;1;1;1;1	1;1;1;1;1	1;1;1;1;1	Desmocollin-1	Dsc1	;;;;	5	1	1	1	1	1	0	1	0	1	0	0	0	1	1	0	1	0	1	0	0	0	1	1	0	1	0	1	0	0	0	0.8	0.8	0.8	92.741	832	832;832;863;839;886	0.0062762	1.2736	By MS/MS	By MS/MS
Q545J0;Q08731;A0A0N4SVN9	Q545J0;Q08731	4;4;1	4;4;1	4;4;1	Lithostathine-2	Reg2	;	3	4	4	4	2	2	1	0	0	4	0	0	0	2	2	1	0	0	4	0	0	0	2	2	1	0	0	4	0	0	0	26	26	26	19.407	173	173;173;132	0.0066372	1.5151	By MS/MS	By matching	By matching
Q3TWM9;Q3UAS4;Q3UE29;E9PZ00;Q3TXJ0;Q8BFQ1;Q3U8C4;Q3U897;Q3U825;Q3U5W2;Q3TXP9;Q3TWL8;Q3TWF9;Q3TWE9;Q3TKK3;Q3TKB2;Q3TIT5;Q3TID4;K3W4L3;B2RUD7;Q3UFE8;J3QPG5;Q61207	Q3TWM9;Q3UAS4;Q3UE29;E9PZ00;Q3TXJ0;Q8BFQ1;Q3U8C4;Q3U897;Q3U825;Q3U5W2;Q3TXP9;Q3TWL8;Q3TWF9;Q3TWE9;Q3TKK3;Q3TKB2;Q3TIT5;Q3TID4;K3W4L3;B2RUD7;Q3UFE8;J3QPG5;Q61207	2;2;2;2;2;2;2;2;2;2;2;2;2;2;2;2;2;2;2;2;2;2;2	2;2;2;2;2;2;2;2;2;2;2;2;2;2;2;2;2;2;2;2;2;2;2	2;2;2;2;2;2;2;2;2;2;2;2;2;2;2;2;2;2;2;2;2;2;2	Prosaposin	Psap	;;;;;;;;;;;;;;;;;;;;;;	23	2	2	2	2	0	1	0	0	2	0	0	0	2	0	1	0	0	2	0	0	0	2	0	1	0	0	2	0	0	0	3.8	3.8	3.8	58.298	527	527;545;551;551;553;554;554;554;554;554;554;554;554;554;554;554;554;554;556;556;557;557;557	0.0045249	1.704	By MS/MS		By matching
P05202	P05202	5	5	5	Aspartate aminotransferase, mitochondrial	Got2		1	5	5	5	5	0	1	0	0	4	0	0	0	5	0	1	0	0	4	0	0	0	5	0	1	0	0	4	0	0	0	16	16	16	47.411	430	430	0	14.884	By MS/MS		By matching
B2RQH0;Q61495;Q7TSF1;Q7TSF0;Q9CUH7;Q7TSF0-2	B2RQH0;Q61495;Q7TSF1;Q7TSF0;Q9CUH7	4;4;4;3;2;1	4;4;4;3;2;1	4;4;4;3;2;1	Desmoglein-1-alpha;Desmoglein-1-beta;Desmoglein-1-gamma	Dsg1b;Dsg1a;Dsg1c	;;;;	6	4	4	4	4	3	1	0	0	3	0	0	0	4	3	1	0	0	3	0	0	0	4	3	1	0	0	3	0	0	0	3.7	3.7	3.7	114.45	1060	1060;1057;1060;911;353;427	0	4.6122	By MS/MS	By MS/MS	By MS/MS
P48678-3;P48678-2;P48678	P48678-3;P48678-2;P48678	3;3;3	3;3;3	3;3;3	Prelamin-A/C;Lamin-A/C	Lmna	;;	3	3	3	3	2	1	0	0	0	3	0	0	0	2	1	0	0	0	3	0	0	0	2	1	0	0	0	3	0	0	0	8.2	8.2	8.2	52.651	462	462;574;665	0.0023753	2.0441	By MS/MS	By matching
Q9Z2L2;D3YZ06;Q545F4;P14602-3;P14602-2;P14602	Q9Z2L2;D3YZ06;Q545F4;P14602-3;P14602-2;P14602	2;1;1;1;1;1	2;1;1;1;1;1	2;1;1;1;1;1	Heat shock protein beta-1	Hspb1	;;;;;	6	2	2	2	1	1	0	0	0	2	0	0	0	1	1	0	0	0	2	0	0	0	1	1	0	0	0	2	0	0	0	30.5	30.5	30.5	9.4115	82	82;147;209;175;197;209	0	3.169	By MS/MS	By MS/MS
Q3U131;Q811C8;A0A5E1;Q3UFA6;F8WH23;Q61581;E9Q5D9	Q3U131;Q811C8;A0A5E1;Q3UFA6;F8WH23;Q61581;E9Q5D9	3;3;3;3;3;3;2	3;3;3;3;3;3;2	3;3;3;3;3;3;2	Insulin-like growth factor-binding protein 7	Igfbp7	;;;;;;	7	3	3	3	1	0	0	0	0	3	0	0	0	1	0	0	0	0	3	0	0	0	1	0	0	0	0	3	0	0	0	17.4	17.4	17.4	26.427	253	253;263;281;282;282;281;313	0	2.1089	By matching
Q3UWH6;Q9D0C0;Q543M3;Q3UHZ4;Q3U5U9;Q3TVJ1;Q3TT75;Q3TNC8;P06797;Q6LAF5	Q3UWH6;Q9D0C0;Q543M3;Q3UHZ4;Q3U5U9;Q3TVJ1;Q3TT75;Q3TNC8;P06797;Q6LAF5	2;2;2;2;2;2;2;2;2;1	2;2;2;2;2;2;2;2;2;1	2;2;2;2;2;2;2;2;2;1	Cathepsin L1;Cathepsin L1 heavy chain;Cathepsin L1 light chain	Ctsl	;;;;;;;;;	10	2	2	2	1	0	0	0	0	2	0	0	0	1	0	0	0	0	2	0	0	0	1	0	0	0	0	2	0	0	0	11.7	11.7	11.7	34.771	308	308;334;334;334;334;334;334;334;334;168	0	6.8017	By matching
A0A0A0MQ97;G3X9C2	A0A0A0MQ97;G3X9C2	1;1	1;1	1;1	F-box only protein 50	Nccrp1	;	2	1	1	1	1	0	0	0	0	1	0	0	0	1	0	0	0	0	1	0	0	0	1	0	0	0	0	1	0	0	0	3.8	3.8	3.8	33.027	291	291;266	0.00998	1.159	By matching
Q8C1X9;Q3U737;Q3TLP4;Q3TFK4;O35639;A0A0G2JDV9;Q3TET3	Q8C1X9;Q3U737;Q3TLP4;Q3TFK4;O35639;A0A0G2JDV9;Q3TET3	2;2;2;2;2;1;1	2;2;2;2;2;1;1	2;2;2;2;2;1;1	Annexin;Annexin A3	Anxa3	;;;;;;	7	2	2	2	1	0	0	0	0	2	0	0	0	1	0	0	0	0	2	0	0	0	1	0	0	0	0	2	0	0	0	7.4	7.4	7.4	36.356	323	323;323;323;323;323;78;180	0	3.8647	By matching
Q3UPK6;Q3TUX3;Q3TUI9;D3YX79;Q9Z2U1	Q3UPK6;Q3TUX3;Q3TUI9;D3YX79;Q9Z2U1	1;1;1;1;1	1;1;1;1;1	1;1;1;1;1	Proteasome subunit alpha type;Proteasome subunit alpha type-5	Psma5;Gm8394	;;;;	5	1	1	1	1	0	0	0	0	1	0	0	0	1	0	0	0	0	1	0	0	0	1	0	0	0	0	1	0	0	0	7.9	7.9	7.9	26.411	241	241;241;241;241;241	0.0023095	1.881	By matching
Q9D2Q8	Q9D2Q8	2	2	2	Protein S100-A14	S100a14		1	2	2	2	2	0	0	0	0	2	0	0	0	2	0	0	0	0	2	0	0	0	2	0	0	0	0	2	0	0	0	21.2	21.2	21.2	11.599	104	104	0	9.576	By MS/MS
G5E8D1;A9JTY7;O70562;O70558;O70555;O70554;O70559	G5E8D1;A9JTY7;O70562;O70558;O70555;O70554;O70559	1;1;1;1;1;1;1	1;1;1;1;1;1;1	1;1;1;1;1;1;1	Small proline-rich protein 2K;Small proline-rich protein 2G;Small proline-rich protein 2D;Small proline-rich protein 2B;Small proline-rich protein 2H	Sprr2k;Sprr2b;Sprr2g;Sprr2d;Sprr2h	;;;;;;	7	1	1	1	1	0	0	0	0	1	0	0	0	1	0	0	0	0	1	0	0	0	1	0	0	0	0	1	0	0	0	13.2	13.2	13.2	7.559	68	68;98;68;76;85;98;108	0	2.1029	By MS/MS
Q3UEN1;Q8R093;Q8CGR7	Q3UEN1;Q8R093;Q8CGR7	1;1;1	1;1;1	1;1;1	Uridine phosphorylase;Uridine phosphorylase 2	Upp2	;;	3	1	1	1	1	0	0	0	0	1	0	0	0	1	0	0	0	0	1	0	0	0	1	0	0	0	0	1	0	0	0	4.1	4.1	4.1	35.755	320	320;338;320	1	-2	By MS/MS
Q3U6E4;Q0VGU2;Q8C2T3;Q3U8X6;Q3UA54;P26350;A0A087WP98;A0A087WPN6;Q8CAQ5;A0A087WQN2;J3QPK6	Q3U6E4;Q0VGU2;Q8C2T3;Q3U8X6;Q3UA54;P26350;A0A087WP98;A0A087WPN6;Q8CAQ5;A0A087WQN2;J3QPK6	2;2;2;2;2;2;1;1;1;1;1	2;2;2;2;2;2;1;1;1;1;1	2;2;2;2;2;2;1;1;1;1;1	Prothymosin alpha;Prothymosin alpha, N-terminally processed;Thymosin alpha	Ptma;Gm12504;Gm6625	;;;;;;;;;;	11	2	2	2	2	0	0	0	0	2	0	0	0	2	0	0	0	0	2	0	0	0	2	0	0	0	0	2	0	0	0	20.7	20.7	20.7	12.325	111	111;111;171;171;172;111;58;98;101;145;166	0	3.5476	By MS/MS
P97350	P97350	2	2	2	Plakophilin-1	Pkp1		1	2	2	2	1	0	0	0	0	2	0	0	0	1	0	0	0	0	2	0	0	0	1	0	0	0	0	2	0	0	0	3	3	3	80.895	728	728	0	20.099	By MS/MS
Q542H2;Q3UIT9;Q3TN31;Q9Z2U0;Q3THL2;Q8VEB8;B7ZMS3;Q9CWH6	Q542H2;Q3UIT9;Q3TN31;Q9Z2U0;Q3THL2	3;3;3;3;2;1;1;1	3;3;3;3;2;1;1;1	3;3;3;3;2;1;1;1	Proteasome subunit alpha type;Proteasome subunit alpha type-7	Psma7	;;;;	8	3	3	3	2	0	0	0	0	2	0	0	0	2	0	0	0	0	2	0	0	0	2	0	0	0	0	2	0	0	0	11.3	11.3	11.3	27.855	248	248;248;248;248;178;98;178;250	0.0080808	1.1943	By MS/MS
D3YV69;Q3U4W5;Q0PD54;Q0PD53;Q0PD15;P61294;P35279-2;P35279;Q8BHD0	D3YV69;Q3U4W5;Q0PD54;Q0PD53;Q0PD15;P61294;P35279-2;P35279;Q8BHD0	1;1;1;1;1;1;1;1;1	1;1;1;1;1;1;1;1;1	1;1;1;1;1;1;1;1;1	Ras-related protein Rab-6B;Ras-related protein Rab-6A;Ras-related protein Rab-39A	Rab6a;Rab6b;Rab39;Rab39a	;;;;;;;;	9	1	1	1	1	0	0	0	0	1	0	0	0	1	0	0	0	0	1	0	0	0	1	0	0	0	0	1	0	0	0	6.3	6.3	6.3	19.961	175	175;208;208;208;217;208;208;208;217	0	8.9533	By MS/MS
Q8C1Y3;Q3U4Y0;P10922	Q8C1Y3;Q3U4Y0;P10922	2;2;2	2;2;2	2;2;2	Histone H1.0;Histone H1.0, N-terminally processed	H1f0	;;	3	2	2	2	2	0	0	0	0	2	0	0	0	2	0	0	0	0	2	0	0	0	2	0	0	0	0	2	0	0	0	12.8	12.8	12.8	19.253	179	179;194;194	0	2.4261	By MS/MS
Q8VDD5;Q3UFT0;Q99JJ3;Q811J9;E9QPE7;Q8R384;Q69ZX3;O08638-2;O08638;O89055;Q7TQJ6	Q8VDD5;Q3UFT0	5;4;2;2;2;2;2;2;2;1;1	5;4;2;2;2;2;2;2;2;1;1	5;4;2;2;2;2;2;2;2;1;1	Myosin-9	Myh9	;	11	5	5	5	4	0	0	0	0	3	0	0	0	4	0	0	0	0	3	0	0	0	4	0	0	0	0	3	0	0	0	3.3	3.3	3.3	226.37	1960	1960;959;529;575;1938;1972;1984;1938;1972;157;378	0	3.0189	By MS/MS
Q9D6F7;Q3TVJ8;Q9DC94;Q9D8L3;Q62186	Q9D6F7;Q3TVJ8;Q9DC94;Q9D8L3;Q62186	1;1;1;1;1	1;1;1;1;1	1;1;1;1;1	Translocon-associated protein subunit delta	Ssr4	;;;;	5	1	1	1	0	0	0	0	0	1	0	0	0	0	0	0	0	0	1	0	0	0	0	0	0	0	0	1	0	0	0	6.4	6.4	6.4	18.996	172	172;172;173;173;172	0.0098814	1.1292
Q08189	Q08189	1	1	1	Protein-glutamine gamma-glutamyltransferase E;Protein-glutamine gamma-glutamyltransferase E 50 kDa catalytic chain;Protein-glutamine gamma-glutamyltransferase E 27 kDa non-catalytic chain	Tgm3		1	1	1	1	0	0	0	0	0	1	0	0	0	0	0	0	0	0	1	0	0	0	0	0	0	0	0	1	0	0	0	1.9	1.9	1.9	77.308	693	693	0	4.0433
Q3TVS1;Q3TXI9;Q3TWF3;Q53ZT3;P12023-3;P12023;Q8BPC7;Q6GR78;P12023-2	Q3TVS1;Q3TXI9;Q3TWF3;Q53ZT3;P12023-3;P12023;Q8BPC7;Q6GR78;P12023-2	2;2;2;2;2;2;1;1;1	2;2;2;2;2;2;1;1;1	2;2;2;2;2;2;1;1;1	Amyloid beta A4 protein;N-APP;Soluble APP-alpha;Soluble APP-beta;C99;Beta-amyloid protein 42;Beta-amyloid protein 40;C83;P3(42);P3(40);C80;Gamma-secretase C-terminal fragment 59;Gamma-secretase C-terminal fragment 57;Gamma-secretase C-terminal fragment 50;C31	App	;;;;;;;;	9	2	2	2	0	0	0	0	0	2	0	0	0	0	0	0	0	0	2	0	0	0	0	0	0	0	0	2	0	0	0	4.3	4.3	4.3	65.951	582	582;752;752;770;735;770;384;695;695	0	3.5772
Q3TYI8;B7ZWK3;A3KGU5;B9EKJ1;B2RXX6;A3KGU7;E9Q447;A3KGU9;P16546-2;P16546	Q3TYI8;B7ZWK3;A3KGU5;B9EKJ1;B2RXX6;A3KGU7;E9Q447;A3KGU9;P16546-2;P16546	1;1;1;1;1;1;1;1;1;1	1;1;1;1;1;1;1;1;1;1	1;1;1;1;1;1;1;1;1;1	Spectrin alpha chain, non-erythrocytic 1	Sptan1	;;;;;;;;;	10	1	1	1	0	0	0	0	0	1	0	0	0	0	0	0	0	0	1	0	0	0	0	0	0	0	0	1	0	0	0	1.1	1.1	1.1	93.119	808	808;2457;2457;2477;2477;2477;2478;2498;2452;2472	0.0063966	1.3245
D3Z513;D3Z4N2;Q547B5;Q3TND2;Q6PKE3;Q3TLP1;F8WIP8;P10923	D3Z513;D3Z4N2;Q547B5;Q3TND2;Q6PKE3;Q3TLP1;F8WIP8;P10923	1;1;1;1;1;1;1;1	1;1;1;1;1;1;1;1	1;1;1;1;1;1;1;1	Osteopontin	Spp1	;;;;;;;	8	1	1	1	0	0	0	0	0	1	0	0	0	0	0	0	0	0	1	0	0	0	0	0	0	0	0	1	0	0	0	13.2	13.2	13.2	16.512	152	152;164;294;294;295;295;295;294	0.0062893	1.2754
Q80XQ1;Q6VGS5;Q6VGS5-2	Q80XQ1;Q6VGS5;Q6VGS5-2	1;1;1	1;1;1	1;1;1	Protein Daple	Ccdc88c	;;	3	1	1	1	0	0	0	0	0	1	0	0	0	0	0	0	0	0	1	0	0	0	0	0	0	0	0	1	0	0	0	1.2	1.2	1.2	164.05	1427	1427;2009;2016	1	-2
Q91VR8	Q91VR8	1	1	1	Protein BRICK1	Brk1		1	1	1	1	1	1	1	0	1	0	0	0	0	1	1	1	0	1	0	0	0	0	1	1	1	0	1	0	0	0	0	9.3	9.3	9.3	8.7608	75	75	0	3.0632	By matching	By matching	By matching
Q8BIL5-2;Q8BIL5	Q8BIL5-2;Q8BIL5	1;1	1;1	1;1	Protein Hook homolog 1	Hook1	;	2	1	1	1	0	0	0	0	1	0	0	0	0	0	0	0	0	1	0	0	0	0	0	0	0	0	1	0	0	0	0	3.1	3.1	3.1	64.01	549	549;728	1	-2
D3YUM9;D3YZ69;Q3UHD3-4;Q3UHD3-3;Q3UHD3	D3YUM9;D3YZ69;Q3UHD3-4;Q3UHD3-3;Q3UHD3	1;1;1;1;1	1;1;1;1;1	1;1;1;1;1	Microtubule-associated tumor suppressor candidate 2 homolog	Mtus2	;;;;	5	1	1	1	0	0	1	1	0	0	0	0	0	0	0	1	1	0	0	0	0	0	0	0	1	1	0	0	0	0	0	11.8	11.8	11.8	19.725	170	170;315;152;348;1353	1	-2			By matching
Q69ZV6;Q810B7-2;Q810B7	Q69ZV6;Q810B7-2;Q810B7	1;1;1	1;1;1	1;1;1	SLIT and NTRK-like protein 5	Slitrk5	;;	3	1	1	1	0	0	1	1	0	0	0	0	0	0	0	1	1	0	0	0	0	0	0	0	1	1	0	0	0	0	0	1.2	1.2	1.2	94.011	839	839;755;957	1	-2			By MS/MS
Q8CFJ0;E9Q6P8	Q8CFJ0;E9Q6P8	1;1	1;1	1;1		Rsrc1	;	2	1	1	1	0	1	0	1	0	0	0	0	0	0	1	0	1	0	0	0	0	0	0	1	0	1	0	0	0	0	0	3.2	3.2	3.2	33.088	281	281;281	1	-2		By MS/MS
Q14BG3;Q8CEQ0	Q14BG3;Q8CEQ0	1;1	1;1	1;1	Cyclin-dependent kinase-like 1	Cdkl1	;	2	1	1	1	0	0	0	1	0	0	0	0	0	0	0	0	1	0	0	0	0	0	0	0	0	1	0	0	0	0	0	3.7	3.7	3.7	41.023	352	352;352	1	-2
E9Q9S3;B2RUE3;Q6EJB6	E9Q9S3;B2RUE3;Q6EJB6	1;1;1	1;1;1	1;1;1	U3 small nucleolar RNA-associated protein 14 homolog B	Utp14b	;;	3	1	1	1	0	0	1	0	0	0	0	0	0	0	0	1	0	0	0	0	0	0	0	0	1	0	0	0	0	0	0	1.9	1.9	1.9	88.636	780	780;780;756	1	-2			By MS/MS
A0A140LIH9;A0A140LIJ9;E9Q173	A0A140LIH9;A0A140LIJ9;E9Q173	1;1;1	1;1;1	1;1;1	BTB/POZ domain-containing protein 16	Btbd16	;;	3	1	1	1	0	1	0	0	0	0	0	0	0	0	1	0	0	0	0	0	0	0	0	1	0	0	0	0	0	0	0	3.6	3.6	3.6	37.709	329	329;506;522	1	-2		By MS/MS
Q792A4;P56392	Q792A4;P56392	1;1	1;1	1;1	Cytochrome c oxidase subunit 7A1, mitochondrial	Cox7a1	;	2	1	1	1	0	1	0	0	0	0	0	0	0	0	1	0	0	0	0	0	0	0	0	1	0	0	0	0	0	0	0	15	15	15	8.9863	80	80;80	1	-2		By MS/MS
P70181-2;P70181	P70181-2;P70181	1;1	1;1	1;1	Phosphatidylinositol 4-phosphate 5-kinase type-1 beta	Pip5k1b	;	2	1	1	1	0	1	0	0	0	0	0	0	0	0	1	0	0	0	0	0	0	0	0	1	0	0	0	0	0	0	0	2.3	2.3	2.3	55.079	487	487;539	1	-2		By MS/MS
Q0PD65;P53994;Q8BXY4;Q6PDZ3;Q3TEG7;Q9DB48;Q5U628;Q0PD64;P59279	Q0PD65;P53994;Q8BXY4;Q6PDZ3	3;3;2;2;1;1;1;1;1	3;3;2;2;1;1;1;1;1	3;3;2;2;1;1;1;1;1	Ras-related protein Rab-2A	Rab2a	;;;	9	3	3	3	3	0	0	0	0	0	0	0	0	3	0	0	0	0	0	0	0	0	3	0	0	0	0	0	0	0	0	20.3	20.3	20.3	23.547	212	212;212;168;212;193;216;216;216;216	0	3.9302	By MS/MS
Q8CHR4;O35619;B0QZN5;P63024;P63044	Q8CHR4;O35619;B0QZN5;P63024;P63044	1;1;1;1;1	1;1;1;1;1	1;1;1;1;1	Vesicle-associated membrane protein 3;Vesicle-associated membrane protein 2	Vamp2;Vamp3	;;;;	5	1	1	1	1	0	0	0	0	0	0	0	0	1	0	0	0	0	0	0	0	0	1	0	0	0	0	0	0	0	0	14.7	14.7	14.7	12.691	116	116;116;163;103;116	0	2.995	By MS/MS
Q5HZY7;Q3U7E0;Q9CR51	Q5HZY7;Q3U7E0;Q9CR51	1;1;1	1;1;1	1;1;1	V-type proton ATPase subunit G 1	Atp6v1g1	;;	3	1	1	1	1	0	0	0	0	0	0	0	0	1	0	0	0	0	0	0	0	0	1	0	0	0	0	0	0	0	0	12.7	12.7	12.7	13.724	118	118;118;118	0	2.4948	By MS/MS
Q8BW75;E9Q3X6	Q8BW75;E9Q3X6	3;2	3;2	3;2	Amine oxidase [flavin-containing] B	Maob	;	2	3	3	3	3	0	0	0	0	0	0	0	0	3	0	0	0	0	0	0	0	0	3	0	0	0	0	0	0	0	0	8.7	8.7	8.7	58.557	520	520;211	0	4.7481	By MS/MS
M0QWX7;A2RSV8;P19783	M0QWX7;A2RSV8;P19783	1;1;1	1;1;1	1;1;1	Cytochrome c oxidase subunit 4 isoform 1, mitochondrial	Cox4i1	;;	3	1	1	1	1	0	0	0	0	0	0	0	0	1	0	0	0	0	0	0	0	0	1	0	0	0	0	0	0	0	0	13	13	13	10.846	92	92;169;169	0.0023529	1.996	By MS/MS
Q3UB63;Q3U995;Q3THU8;G5E902;Q8VEM8	Q3UB63;Q3U995;Q3THU8;G5E902;Q8VEM8	2;2;2;2;2	2;2;2;2;2	2;2;2;2;2	Phosphate carrier protein, mitochondrial	Slc25a3	;;;;	5	2	2	2	2	0	0	0	0	0	0	0	0	2	0	0	0	0	0	0	0	0	2	0	0	0	0	0	0	0	0	5.6	5.6	5.6	39.645	357	357;357;357;358;357	0.0062241	1.2577	By MS/MS
Q3UE86;A1A4T2;Q8BHN3;Q8BHN3-2;Q8BHN3-3	Q3UE86;A1A4T2;Q8BHN3;Q8BHN3-2	3;3;3;3;1	3;3;3;3;1	3;3;3;3;1	Neutral alpha-glucosidase AB	Ganab	;;;	5	3	3	3	3	0	0	0	0	0	0	0	0	3	0	0	0	0	0	0	0	0	3	0	0	0	0	0	0	0	0	6.4	6.4	6.4	79.356	702	702;966;944;966;692	0.0064795	1.3807	By MS/MS
Q80XJ7;Q540D7;Q3UJW9;Q9JII6;B1AXW3	Q80XJ7;Q540D7;Q3UJW9;Q9JII6;B1AXW3	2;2;2;2;1	2;2;2;2;1	2;2;2;2;1	Alcohol dehydrogenase [NADP(+)]	Akr1a1	;;;;	5	2	2	2	2	0	0	0	0	0	0	0	0	2	0	0	0	0	0	0	0	0	2	0	0	0	0	0	0	0	0	8.3	8.3	8.3	36.615	325	325;325;325;325;204	0.0066225	1.5099	By MS/MS
Q9DAM4;Q80X68;Q9CZU6	Q9DAM4;Q80X68;Q9CZU6	1;1;1	1;1;1	1;1;1	Citrate synthase;Citrate synthase, mitochondrial	Csl;Cs	;;	3	1	1	1	1	0	0	0	0	0	0	0	0	1	0	0	0	0	0	0	0	0	1	0	0	0	0	0	0	0	0	3.4	3.4	3.4	52.353	466	466;466;464	0.0023148	1.8848	By MS/MS
Q3U6K8;Q3TIG8;Q3THL7;Q60932-2;Q60932	Q3U6K8;Q3TIG8;Q3THL7;Q60932-2;Q60932	2;2;2;2;2	2;2;2;2;2	2;2;2;2;2	Voltage-dependent anion-selective channel protein 1	Vdac1	;;;;	5	2	2	2	2	0	0	0	0	0	0	0	0	2	0	0	0	0	0	0	0	0	2	0	0	0	0	0	0	0	0	10.6	10.6	10.6	30.725	283	283;283;283;283;296	0.0023697	2.0146	By MS/MS
Q3UBF4;Q3U8R9;Q3UNH3;Q8CDN6	Q3UBF4;Q3U8R9;Q3UNH3;Q8CDN6	1;1;1;1	1;1;1;1	1;1;1;1	Thioredoxin-like protein 1	Txnl1	;;;	4	1	1	1	1	0	0	0	0	0	0	0	0	1	0	0	0	0	0	0	0	0	1	0	0	0	0	0	0	0	0	5.2	5.2	5.2	32.328	289	289;289;301;289	0.0023364	1.9305	By MS/MS
P38647	P38647	1	1	1	Stress-70 protein, mitochondrial	Hspa9		1	1	1	1	1	0	0	0	0	0	0	0	0	1	0	0	0	0	0	0	0	0	1	0	0	0	0	0	0	0	0	1.8	1.8	1.8	73.46	679	679	0.0063025	1.2909	By MS/MS
Q50HX3;Q50HX1;Q50HW9;Q50HX4;Q50HX2;Q50HX0;Q91V41	Q50HX3;Q50HX1;Q50HW9;Q50HX4;Q50HX2;Q50HX0;Q91V41	1;1;1;1;1;1;1	1;1;1;1;1;1;1	1;1;1;1;1;1;1	Ras-related protein Rab-14	Rab14	;;;;;;	7	1	1	1	1	0	0	0	0	0	0	0	0	1	0	0	0	0	0	0	0	0	1	0	0	0	0	0	0	0	0	7.1	7.1	7.1	21.888	197	197;197;197;215;215;215;215	0.0097847	1.0802	By MS/MS
Q3TEG5;E9Q6L3;A0A0R4J1L8;E9QMT1;F6R307;F6RT60;A0A0R4J023;Q9JLZ3-3;Q9JLZ3-2;Q9JLZ3	Q3TEG5;E9Q6L3;A0A0R4J1L8;E9QMT1;F6R307;F6RT60;A0A0R4J023;Q9JLZ3-3;Q9JLZ3-2;Q9JLZ3	1;1;1;1;1;1;1;1;1;1	1;1;1;1;1;1;1;1;1;1	1;1;1;1;1;1;1;1;1;1	Methylglutaconyl-CoA hydratase, mitochondrial	Auh	;;;;;;;;;	10	1	1	1	1	0	0	0	0	0	0	0	0	1	0	0	0	0	0	0	0	0	1	0	0	0	0	0	0	0	0	11.3	11.3	11.3	12.341	115	115;115;144;158;219;239;314;144;158;314	0	2.2635	By MS/MS
Q3ULW0;Q14AA6;A6H622;Q61820;P62827	Q3ULW0;Q14AA6;A6H622;Q61820;P62827	1;1;1;1;1	1;1;1;1;1	1;1;1;1;1	GTP-binding nuclear protein Ran, testis-specific isoform;GTP-binding nuclear protein Ran	Ran;1700009N14Rik;Rasl2-9	;;;;	5	1	1	1	1	0	0	0	0	0	0	0	0	1	0	0	0	0	0	0	0	0	1	0	0	0	0	0	0	0	0	5.1	5.1	5.1	24.351	216	216;216;216;216;216	0.0098619	1.1226	By MS/MS
Q3UG68;Q3UC51;O54734	Q3UG68;Q3UC51;O54734	1;1;1	1;1;1	1;1;1	Dolichyl-diphosphooligosaccharide--protein glycosyltransferase 48 kDa subunit	Ddost	;;	3	1	1	1	1	0	0	0	0	0	0	0	0	1	0	0	0	0	0	0	0	0	1	0	0	0	0	0	0	0	0	2	2	2	48.985	441	441;441;441	0	3.0133	By MS/MS
Q4FJX9;Q3U8W4;P09671	Q4FJX9;Q3U8W4;P09671	1;1;1	1;1;1	1;1;1	Superoxide dismutase;Superoxide dismutase [Mn], mitochondrial	Sod2	;;	3	1	1	1	1	0	0	0	0	0	0	0	0	1	0	0	0	0	0	0	0	0	1	0	0	0	0	0	0	0	0	6.3	6.3	6.3	24.603	222	222;222;222	0.0023474	1.9849	By MS/MS
[truncated: 63 more columns]

## Sheet: Normal-1
Protein IDs	Majority protein IDs	Peptide counts (all)	Peptide counts (razor+unique)	Peptide counts (unique)	Protein names	Gene names	Fasta headers	Number of proteins	Peptides	Razor + unique peptides	Unique peptides	Peptides Normal-1	Peptides Normal-2	Peptides Normal-3	Peptides 1EG-1	Peptides 1EG-2	Peptides 1EG-3	Peptides 2EG-1	Peptides 2EG-2	Peptides 2EG-3	Razor + unique peptides Normal-1	Razor + unique peptides Normal-2	Razor + unique peptides Normal-3	Razor + unique peptides 1EG-1	Razor + unique peptides 1EG-2	Razor + unique peptides 1EG-3	Razor + unique peptides 2EG-1	Razor + unique peptides 2EG-2	Razor + unique peptides 2EG-3	Unique peptides Normal-1	Unique peptides Normal-2	Unique peptides Normal-3	Unique peptides 1EG-1	Unique peptides 1EG-2	Unique peptides 1EG-3	Unique peptides 2EG-1	Unique peptides 2EG-2	Unique peptides 2EG-3	Sequence coverage [%]	Unique + razor sequence coverage [%]	Unique sequence coverage [%]	Mol. weight [kDa]	Sequence length	Sequence lengths	Q-value	Score	Identification type Normal-1	Identification type Normal-2	Identification type Normal-3
Q3UEK0;Q9Z0K8	Q3UEK0;Q9Z0K8	1;1	1;1	1;1	Pantetheinase	Vnn1	;	2	1	1	1	1	1	1	1	1	1	1	1	1	1	1	1	1	1	1	1	1	1	1	1	1	1	1	1	1	1	1	4	4	4	36.775	328	328;512	0	26.693	By MS/MS	By MS/MS	By MS/MS
Q61833;A2ACG7;Q3U505;Q9DBG6	Q61833;A2ACG7;Q3U505;Q9DBG6	2;2;2;2	2;2;2;2	2;2;2;2	Dolichyl-diphosphooligosaccharide--protein glycosyltransferase subunit 2	Rpn2	;;;	4	2	2	2	1	0	1	0	1	1	0	1	1	1	0	1	0	1	1	0	1	1	1	0	1	0	1	1	0	1	1	6.3	6.3	6.3	66.301	607	607;615;659;631	0	2.8673	By MS/MS		By matching
Q3UDA7;Q8BSZ3;Q9DAY9;Q5BL09;Q5SQB0;E9Q5T3;Q5SQB5;Q5U438;Q5SQB7;Q3U536;Q61937	Q3UDA7;Q8BSZ3;Q9DAY9;Q5BL09;Q5SQB0;E9Q5T3;Q5SQB5;Q5U438;Q5SQB7;Q3U536;Q61937	1;1;1;1;1;1;1;1;1;1;1	1;1;1;1;1;1;1;1;1;1;1	1;1;1;1;1;1;1;1;1;1;1	Nucleophosmin	Npm1;Gm5611	;;;;;;;;;;	11	1	1	1	1	0	0	0	0	1	0	1	1	1	0	0	0	0	1	0	1	1	1	0	0	0	0	1	0	1	1	9.5	9.5	9.5	22.124	200	200;226;257;257;264;272;285;292;292;292;292	0	2.1776	By MS/MS
Q8C2E1;Q7TMX2;Q76MZ3	Q8C2E1;Q7TMX2;Q76MZ3	1;1;1	1;1;1	1;1;1	Serine/threonine-protein phosphatase 2A 65 kDa regulatory subunit A alpha isoform	Ppp2r1a	;;	3	1	1	1	1	0	0	0	0	1	0	1	1	1	0	0	0	0	1	0	1	1	1	0	0	0	0	1	0	1	1	3.4	3.4	3.4	65.209	589	589;589;589	0.0045558	1.8018	By MS/MS
A0A0J9YUH8	A0A0J9YUH8	1	1	1				1	1	1	1	1	1	1	1	1	1	1	1	1	1	1	1	1	1	1	1	1	1	1	1	1	1	1	1	1	1	1	11	11	11	8.8338	73	73	0.0099206	1.1334	By MS/MS	By MS/MS	By MS/MS
Q3UKB4;Q3TYS4;Q3TAW4;Q9D662;A2AN97;A2AN98;A2AN99;A2ANA0;Q3U2Q0;Q3TIS3;Q8CDS4	Q3UKB4;Q3TYS4;Q3TAW4;Q9D662;A2AN97;A2AN98;A2AN99;A2ANA0;Q3U2Q0;Q3TIS3	3;3;3;3;2;2;2;2;2;2;1	3;3;3;3;2;2;2;2;2;2;1	3;3;3;3;2;2;2;2;2;2;1	Protein transport protein Sec23B	Sec23b	;;;;;;;;;	11	3	3	3	1	0	0	0	0	1	0	3	1	1	0	0	0	0	1	0	3	1	1	0	0	0	0	1	0	3	1	8.1	8.1	8.1	86.402	767	767;767;767;767;59;122;138;278;295;767;615	0.0044944	1.6613	By MS/MS
D6RI51;Q9JLT2	D6RI51;Q9JLT2	1;1	1;1	1;1	Trehalase	Treh	;	2	1	1	1	1	1	1	1	1	1	0	1	1	1	1	1	1	1	1	0	1	1	1	1	1	1	1	1	0	1	1	4.7	4.7	4.7	17.255	150	150;576	0.006263	1.2734	By MS/MS	By MS/MS	By MS/MS
Q1JUQ7;Q1JUQ8;Q1JUQ6;Q3ULN5;P26883	Q1JUQ7;Q1JUQ8;Q1JUQ6;Q3ULN5;P26883	1;1;1;1;1	1;1;1;1;1	1;1;1;1;1	Peptidyl-prolyl cis-trans isomerase;Peptidyl-prolyl cis-trans isomerase FKBP1A	Fkbp1a	;;;;	5	1	1	1	1	0	0	0	0	1	0	0	1	1	0	0	0	0	1	0	0	1	1	0	0	0	0	1	0	0	1	35.1	35.1	35.1	4.0215	37	37;59;62;108;108	0	2.3028	By MS/MS
Q8BUY8	Q8BUY8	1	1	1	G-protein coupled receptor-associated sorting protein 2	Gprasp2		1	1	1	1	1	1	1	1	0	1	0	0	1	1	1	1	1	0	1	0	0	1	1	1	1	1	0	1	0	0	1	1.9	1.9	1.9	92.801	826	826	0.006135	1.2271	By MS/MS	By MS/MS	By MS/MS
Q642I5;Q9DBB9	Q642I5;Q9DBB9	1;1	1;1	1;1	Carboxypeptidase N subunit 2	Cpn2	;	2	1	1	1	1	1	1	1	1	1	1	1	1	1	1	1	1	1	1	1	1	1	1	1	1	1	1	1	1	1	1	1.9	1.9	1.9	45.709	413	413;547	0.0097656	1.0675	By MS/MS	By MS/MS	By MS/MS
A0A087WP24;A0A087WRJ2;A0A087WPF8;A0A087WQN8;A0A087WSR2;E9QN99;Q8VCR7	A0A087WP24;A0A087WRJ2;A0A087WPF8;A0A087WQN8;A0A087WSR2;E9QN99;Q8VCR7	1;1;1;1;1;1;1	1;1;1;1;1;1;1	1;1;1;1;1;1;1	Alpha/beta hydrolase domain-containing protein 14B	Abhd14b	;;;;;;	7	1	1	1	1	1	0	1	1	0	1	1	1	1	1	0	1	1	0	1	1	1	1	1	0	1	1	0	1	1	1	7.7	7.7	7.7	14.948	142	142;151;174;183;194;210;210	0.0064378	1.3555	By MS/MS	By matching
P12960	P12960	3	3	3	Contactin-1	Cntn1		1	3	3	3	1	1	1	2	2	0	1	2	1	1	1	1	2	2	0	1	2	1	1	1	1	2	2	0	1	2	1	4.2	4.2	4.2	113.39	1020	1020	0	6.0493	By matching	By MS/MS	By MS/MS
Q8CG46-2;Q8CG46	Q8CG46-2;Q8CG46	1;1	1;1	1;1	Structural maintenance of chromosomes protein 5	Smc5	;	2	1	1	1	1	1	1	1	1	1	0	1	1	1	1	1	1	1	1	0	1	1	1	1	1	1	1	1	0	1	1	1	1	1	127.38	1087	1087;1101	1	-2	By MS/MS	By MS/MS	By matching
Q4FJQ6;Q3U3L3;Q60854;E9Q5Q5;E9PZQ9;E9Q4R2;E9PYY0;E9Q3Y1;Q8BZR2;E9Q6X2;E9Q108;E9Q0P9;K7E6F1;F8WIV2	Q4FJQ6;Q3U3L3;Q60854;E9Q5Q5;E9PZQ9;E9Q4R2;E9PYY0;E9Q3Y1;Q8BZR2;E9Q6X2;E9Q108;E9Q0P9;K7E6F1;F8WIV2	2;2;2;1;1;1;1;1;1;1;1;1;1;1	2;2;2;1;1;1;1;1;1;1;1;1;1;1	2;2;2;1;1;1;1;1;1;1;1;1;1;1	Serpin B6	Serpinb6a;Serpinb6	;;;;;;;;;;;;;	14	2	2	2	1	0	0	0	0	1	0	1	1	1	0	0	0	0	1	0	1	1	1	0	0	0	0	1	0	1	1	7.7	7.7	7.7	42.598	378	378;378;378;18;68;73;120;144;156;162;188;193;228;399	0.0066079	1.505	By MS/MS
Q8R393;Q63ZW9;Q8BTF0;F8WHL2;Q8CIE6;Q99JW9;Q8BTF3	Q8R393;Q63ZW9;Q8BTF0;F8WHL2;Q8CIE6;Q99JW9;Q8BTF3	2;2;2;2;2;1;1	2;2;2;2;2;1;1	2;2;2;2;2;1;1	Coatomer subunit alpha;Coatomer subunit alpha;Xenin;Proxenin	Copa	;;;;;;	7	2	2	2	1	0	0	0	0	0	0	1	1	1	0	0	0	0	0	0	1	1	1	0	0	0	0	0	0	1	1	6.4	6.4	6.4	64.676	580	580;1131;1224;1233;1224;300;470	0	2.7484	By MS/MS
S4R2B5;Q6R6I7	S4R2B5;Q6R6I7	1;1	1;1	1;1	Relaxin receptor 1	Rxfp1	;	2	1	1	1	1	1	1	1	1	1	1	1	1	1	1	1	1	1	1	1	1	1	1	1	1	1	1	1	1	1	1	13.7	13.7	13.7	11.191	102	102;758	0.0096154	1.0389	By MS/MS	By MS/MS	By MS/MS
A0A0U1RQ57	A0A0U1RQ57	1	1	1				1	1	1	1	1	1	1	0	1	1	1	1	1	1	1	1	0	1	1	1	1	1	1	1	1	0	1	1	1	1	1	6.6	6.6	6.6	25.283	226	226	1	-2	By matching	By MS/MS	By matching
Q61425	Q61425	5	5	5	Hydroxyacyl-coenzyme A dehydrogenase, mitochondrial	Hadh		1	5	5	5	1	0	0	0	1	1	1	4	3	1	0	0	0	1	1	1	4	3	1	0	0	0	1	1	1	4	3	18.8	18.8	18.8	34.463	314	314	0	14.895	By MS/MS
A6H6Q4	A6H6Q4	1	1	1	Uncharacterized protein C19orf71 homolog			1	1	1	1	1	1	1	1	1	1	1	1	1	1	1	1	1	1	1	1	1	1	1	1	1	1	1	1	1	1	1	4.4	4.4	4.4	23.954	206	206	1	-2	By MS/MS	By MS/MS	By MS/MS
G3UY13;Q3UEL3;E9Q6I2;Q3V2X3;Q3UVZ1;Q61730-2;Q61730;Q61730-3	G3UY13;Q3UEL3;E9Q6I2;Q3V2X3;Q3UVZ1;Q61730-2;Q61730;Q61730-3	2;2;2;2;2;2;2;2	2;2;2;2;2;2;2;2	2;2;2;2;2;2;2;2	Interleukin-1 receptor accessory protein	Il1rap	;;;;;;;	8	2	2	2	1	1	1	1	2	1	1	1	1	1	1	1	1	2	1	1	1	1	1	1	1	1	2	1	1	1	1	5.5	5.5	5.5	39.881	346	346;360;640;685;685;360;570;685	0	2.238	By MS/MS	By MS/MS	By MS/MS
Q04857;B0LAD9;Q99LW4;Q8C6Y0	Q04857;B0LAD9;Q99LW4	3;2;2;1	3;2;2;1	3;2;2;1	Collagen alpha-1(VI) chain	Col6a1	;;	4	3	3	3	1	2	2	2	1	1	1	2	2	1	2	2	2	1	1	1	2	2	1	2	2	2	1	1	1	2	2	3.5	3.5	3.5	108.49	1025	1025;165;406;266	0	9.6509	By MS/MS	By MS/MS	By MS/MS
Q2T9H5;Q9QZ25	Q2T9H5;Q9QZ25	1;1	1;1	1;1	Vascular non-inflammatory molecule 3	Vnn3	;	2	1	1	1	1	1	1	1	1	1	1	1	1	1	1	1	1	1	1	1	1	1	1	1	1	1	1	1	1	1	1	2.4	2.4	2.4	56.229	500	500;500	0	4.3077	By matching	By MS/MS	By MS/MS
P16125;Q5M8R7;D3Z7F0;A0A0N4SVV8;D3YVR7;D3YZE4;Q64483;Q548Z6;P00342	P16125;Q5M8R7;D3Z7F0	6;3;3;2;1;1;1;1;1	6;3;3;2;1;1;1;1;1	5;3;2;1;0;0;0;0;0	L-lactate dehydrogenase B chain;L-lactate dehydrogenase	Ldhb	;;	9	6	6	5	1	2	1	1	3	2	3	3	4	1	2	1	1	3	2	3	3	4	0	1	0	1	3	1	3	3	3	22.5	22.5	18.9	36.572	334	334;101;198;193;235;237;332;332;332	0	11.82	By MS/MS	By MS/MS	By MS/MS
D3YXH9;E9QL22;Q3U1C6-2;Q3U1C6	D3YXH9;E9QL22;Q3U1C6-2;Q3U1C6	1;1;1;1	1;1;1;1	1;1;1;1	Putative deoxyribonuclease TATDN3	Tatdn3	;;;	4	1	1	1	1	1	1	1	1	1	1	1	1	1	1	1	1	1	1	1	1	1	1	1	1	1	1	1	1	1	1	5.8	5.8	5.8	32.279	293	293;294;290;294	0.0097087	1.0518	By MS/MS	By MS/MS	By MS/MS
F6W4D3;D3YY36;Q8VC96;Q9DBD0	F6W4D3;D3YY36;Q8VC96;Q9DBD0	2;2;2;2	1;1;1;1	1;1;1;1	Inhibitor of carbonic anhydrase	1300017J02Rik;Ica	;;;	4	2	1	1	1	2	1	2	2	1	1	2	2	1	1	1	1	1	1	1	1	1	1	1	1	1	1	1	1	1	1	9.9	5.4	5.4	26.65	242	242;622;700;700	0	13.41	By MS/MS	By MS/MS	By MS/MS
Q6PGF7	Q6PGF7	1	1	1	Exocyst complex component 8	Exoc8		1	1	1	1	1	0	1	0	0	1	1	1	1	1	0	1	0	0	1	1	1	1	1	0	1	0	0	1	1	1	1	1.4	1.4	1.4	81.034	716	716	0.0061602	1.2341	By MS/MS		By MS/MS
H7BWY6;Q00724;Q3TF08	H7BWY6;Q00724;Q3TF08	2;2;1	2;2;1	2;2;1	Retinol-binding protein 4	Rbp4	;;	3	2	2	2	1	2	1	1	1	0	1	1	1	1	2	1	1	1	0	1	1	1	1	2	1	1	1	0	1	1	1	11.8	11.8	11.8	28.405	245	245;201;174	0	4.4824	By MS/MS	By MS/MS	By MS/MS
Q9Z1R3	Q9Z1R3	1	1	1	Apolipoprotein M	Apom		1	1	1	1	1	1	1	1	1	0	1	1	1	1	1	1	1	1	0	1	1	1	1	1	1	1	1	0	1	1	1	7.9	7.9	7.9	21.273	190	190	0	12.343	By matching	By MS/MS	By MS/MS
Q64374	Q64374	2	2	2	Regucalcin	Rgn		1	2	2	2	1	1	1	1	1	0	1	2	2	1	1	1	1	1	0	1	2	2	1	1	1	1	1	0	1	2	2	9.4	9.4	9.4	33.406	299	299	0	13.924	By MS/MS	By MS/MS	By MS/MS
Q6VEU6;P02798	Q6VEU6;P02798	1;1;1	1;1;1	1;1;1	Metallothionein;Metallothionein-2	Mt2	;;	3	1	1	1	1	0	1	0	1	0	1	1	1	1	0	1	0	1	0	1	1	1	1	0	1	0	1	0	1	1	1	19.7	19.7	19.7	6.0562	61	61;61;61	0	7.9689	By matching		By MS/MS
Q3UN43;Q4KMV6;Q571D8;Q3U325;Q80XQ2	Q3UN43;Q4KMV6;Q571D8;Q3U325;Q80XQ2	1;1;1;1;1	1;1;1;1;1	1;1;1;1;1	TBC1 domain family member 5	Tbc1d5	;;;;	5	1	1	1	1	1	1	1	1	1	0	1	1	1	1	1	1	1	1	0	1	1	1	1	1	1	1	1	0	1	1	1.3	1.3	1.3	62.176	544	544;653;821;837;815	1	-2	By MS/MS	By MS/MS	By matching
P10639	P10639	2	2	2	Thioredoxin	Txn		1	2	2	2	1	0	0	0	1	1	0	2	2	1	0	0	0	1	1	0	2	2	1	0	0	0	1	1	0	2	2	21	21	21	11.675	105	105	0	2.7721	By MS/MS
B1AZS9;O08807	B1AZS9;O08807	2;2	1;1	1;1	Peroxiredoxin-4	Prdx4	;	2	2	1	1	1	0	1	1	0	1	0	1	2	0	0	0	0	0	0	0	1	1	0	0	0	0	0	0	0	1	1	8.3	4.8	4.8	26.391	229	229;274	0.0097276	1.0521	By matching		By matching
Q3TG17;H3BLL4;B2M1R6;Q3U9Q3;Q3U6X2;Q3TUA1;Q3TJ38;Q5FWJ5;Q3TL71;P61979-3;P61979;P61979-2;H3BLP7;D3Z5X4;D3YWG1;H3BK96;H3BKD0	Q3TG17;H3BLL4;B2M1R6;Q3U9Q3;Q3U6X2;Q3TUA1;Q3TJ38;Q5FWJ5;Q3TL71;P61979-3;P61979;P61979-2;H3BLP7;D3Z5X4;D3YWG1	3;3;3;3;3;3;3;3;3;3;3;3;2;2;2;1;1	3;3;3;3;3;3;3;3;3;3;3;3;2;2;2;1;1	3;3;3;3;3;3;3;3;3;3;3;3;2;2;2;1;1	Heterogeneous nuclear ribonucleoprotein K	Hnrnpk;Gm7964	;;;;;;;;;;;;;;	17	3	3	3	1	0	0	1	0	1	0	2	3	1	0	0	1	0	1	0	2	3	1	0	0	1	0	1	0	2	3	13.7	13.7	13.7	43.254	394	394;394;440;450;459;463;463;464;464;439;463;464;210;439;463;257;299	0	25.31	By MS/MS
Q545F0;P34884	Q545F0;P34884	2;2	2;2	2;2	Macrophage migration inhibitory factor	Mif	;	2	2	2	2	1	0	0	0	0	1	0	2	2	1	0	0	0	0	1	0	2	2	1	0	0	0	0	1	0	2	2	26.1	26.1	26.1	12.504	115	115;115	0	5.1837	By MS/MS
A5GZX3;Q9CPU0	A5GZX3;Q9CPU0	1;1	1;1	1;1	Lactoylglutathione lyase	Glo1	;	2	1	1	1	1	0	0	0	0	1	0	1	1	1	0	0	0	0	1	0	1	1	1	0	0	0	0	1	0	1	1	5.4	5.4	5.4	20.809	184	184;184	0	2.383	By MS/MS
A1L0U6;A2AS98;P28660-2;P28660	A1L0U6;A2AS98;P28660-2;P28660	1;1;1;1	1;1;1;1	1;1;1;1	Nck-associated protein 1	Nckap1	;;;	4	1	1	1	1	1	1	1	1	1	0	1	1	1	1	1	1	1	1	0	1	1	1	1	1	1	1	1	0	1	1	0.8	0.8	0.8	129.38	1133	1133;1134;1037;1128	0.0080483	1.1916	By MS/MS	By MS/MS	By MS/MS
Q3U5K7;Q9EPX9;P21460;A2APX3	Q3U5K7;Q9EPX9;P21460;A2APX3	3;3;3;2	3;3;3;2	3;3;3;2	Cystatin-C	Cst3	;;;	4	3	3	3	1	0	0	0	0	3	0	1	3	1	0	0	0	0	3	0	1	3	1	0	0	0	0	3	0	1	3	32.8	32.8	32.8	15.217	137	137;140;140;102	0	10.739	By MS/MS
Q58E35;P47955;E9Q3T0	Q58E35;P47955;E9Q3T0	2;2;1	2;2;1	2;2;1	60S acidic ribosomal protein P1	Rplp1;Gm10073	;;	3	2	2	2	1	0	0	0	1	0	0	1	1	1	0	0	0	1	0	0	1	1	1	0	0	0	1	0	0	1	1	51.8	51.8	51.8	11.475	114	114;114;114	0.006424	1.3473	By MS/MS
Q80ZP8;A8C1V1;Q3TMX5;F6USD5;F6T4L3;Q9CXI5	Q80ZP8;A8C1V1;Q3TMX5;F6USD5;F6T4L3;Q9CXI5	3;3;3;2;2;2	3;3;3;2;2;2	3;3;3;2;2;2	Mesencephalic astrocyte-derived neurotrophic factor	Manf	;;;;;	6	3	3	3	1	0	1	0	0	0	0	3	3	1	0	1	0	0	0	0	3	3	1	0	1	0	0	0	0	3	3	16.4	16.4	16.4	19.012	165	165;170;179;121;128;179	0	7.0207	By MS/MS		By matching
Q91Z57;Q3U9R7;Q3UB84;Q3UAS7;Q3TXK9;Q3TWI5;P47791-2;P47791	Q91Z57;Q3U9R7;Q3UB84;Q3UAS7;Q3TXK9;Q3TWI5;P47791-2;P47791	3;3;3;3;3;3;3;3	3;3;3;3;3;3;3;3	3;3;3;3;3;3;3;3	Glutathione reductase, mitochondrial	Gsr	;;;;;;;	8	3	3	3	1	0	0	0	0	0	0	1	2	1	0	0	0	0	0	0	1	2	1	0	0	0	0	0	0	1	2	15.2	15.2	15.2	40.549	375	375;453;482;482;483;491;474;500	0	15.682	By MS/MS
A0A087WNN3;Q6ZPR6-2;Q6ZPR6	A0A087WNN3;Q6ZPR6-2;Q6ZPR6	2;2;2	2;2;2	2;2;2	Inhibitor of Bruton tyrosine kinase	Ibtk	;;	3	2	2	2	1	1	1	2	1	1	0	0	1	1	1	1	2	1	1	0	0	1	1	1	1	2	1	1	0	0	1	3.4	3.4	3.4	54.675	495	495;1251;1352	1	-2	By matching	By MS/MS	By matching
G3UYV7;Q059I1;P62858	G3UYV7;Q059I1;P62858	1;1;1	1;1;1	1;1;1	40S ribosomal protein S28	Rps28	;;	3	1	1	1	1	0	0	0	0	1	0	0	1	1	0	0	0	0	1	0	0	1	1	0	0	0	0	1	0	0	1	21.4	21.4	21.4	6.3442	56	56;69;69	0.0022989	1.8546	By MS/MS
Q5BLK2;P60867	Q5BLK2;P60867	1;1	1;1	1;1	40S ribosomal protein S20	Rps20	;	2	1	1	1	1	0	0	0	0	1	0	0	1	1	0	0	0	0	1	0	0	1	1	0	0	0	0	1	0	0	1	10.1	10.1	10.1	13.373	119	119;119	0	2.3875	By MS/MS
A4FUS1;Q641N3;Q5CZY9;P14131	A4FUS1;Q641N3;Q5CZY9;P14131	1;1;1;1	1;1;1;1	1;1;1;1	40S ribosomal protein S16	Rps16	;;;	4	1	1	1	1	0	1	1	0	1	0	0	1	1	0	1	1	0	1	0	0	1	1	0	1	1	0	1	0	0	1	6.8	6.8	6.8	16.445	146	146;157;172;146	0.0065789	1.4913	By MS/MS		By matching
Q9JK98;Q549A5;Q06890;E9Q9B8;E9PUU2;E9PXG5;E9Q8Y5	Q9JK98;Q549A5;Q06890;E9Q9B8;E9PUU2;E9PXG5;E9Q8Y5	3;3;3;2;2;2;2	3;3;3;2;2;2;2	3;3;3;2;2;2;2	Clusterin;Clusterin;Clusterin beta chain;Clusterin alpha chain	Clu	;;;;;;	7	3	3	3	1	1	1	0	0	1	0	0	2	1	1	1	0	0	1	0	0	2	1	1	1	0	0	1	0	0	2	10.2	10.2	10.2	43.109	372	372;448;448;203;225;233;265	0	3.5578	By matching	By MS/MS	By matching
P63028	P63028	2	2	2	Translationally-controlled tumor protein	Tpt1		1	2	2	2	1	0	1	0	0	1	0	0	1	1	0	1	0	0	1	0	0	1	1	0	1	0	0	1	0	0	1	15.7	15.7	15.7	19.462	172	172	0	4.6427	By MS/MS		By MS/MS
Q8VCK2;F6Y6L6;Q3U7I9;Q3UCW4;Q3UCD9;Q3UAQ1;Q3U8W5;Q3U7P0;Q3U651;Q3TXL5;Q3TWR6;Q3TWD0;Q3TIR0;Q8C243;P18242;F8WIR1;Q3TWL1;Q3UC89;Q3TJN3	Q8VCK2;F6Y6L6;Q3U7I9;Q3UCW4;Q3UCD9;Q3UAQ1;Q3U8W5;Q3U7P0;Q3U651;Q3TXL5;Q3TWR6;Q3TWD0;Q3TIR0;Q8C243;P18242;F8WIR1;Q3TWL1;Q3UC89;Q3TJN3	2;2;2;2;2;2;2;2;2;2;2;2;2;2;2;1;1;1;1	2;2;2;2;2;2;2;2;2;2;2;2;2;2;2;1;1;1;1	2;2;2;2;2;2;2;2;2;2;2;2;2;2;2;1;1;1;1	Cathepsin D	Ctsd	;;;;;;;;;;;;;;;;;;	19	2	2	2	1	0	0	0	0	1	0	0	1	1	0	0	0	0	1	0	0	1	1	0	0	0	0	1	0	0	1	16.6	16.6	16.6	23.931	217	217;278;404;410;410;410;410;410;410;410;410;410;410;445;410;274;335;410;410	0	3.3358	By MS/MS
Q9D1D4;Q9D1D4-2	Q9D1D4;Q9D1D4-2	2;1	2;1	2;1	Transmembrane emp24 domain-containing protein 10	Tmed10	;	2	2	2	2	1	0	0	0	0	2	0	0	1	1	0	0	0	0	2	0	0	1	1	0	0	0	0	2	0	0	1	9.1	9.1	9.1	24.911	219	219;94	0	2.9328	By MS/MS
Q3TNZ8;Q0V927;E9PYT5;Q3UHL7;E9QN70;B9EKB0;P02469	Q3TNZ8;Q0V927;E9PYT5;Q3UHL7;E9QN70;B9EKB0;P02469	1;1;1;1;1;1;1	1;1;1;1;1;1;1	1;1;1;1;1;1;1	Laminin subunit beta-1	Lamb1	;;;;;;	7	1	1	1	1	1	1	0	0	0	0	0	1	1	1	1	0	0	0	0	0	1	1	1	1	0	0	0	0	0	1	4.5	4.5	4.5	37.771	332	332;563;564;1834;1834;1834;1786	0	3.16	By MS/MS	By MS/MS	By MS/MS
Q3UH62;E9PZP2;B2RQQ4;Q5SEK5;E9QLR8;Q924W6-2;Q924W6	Q3UH62;E9PZP2;B2RQQ4;Q5SEK5;E9QLR8;Q924W6-2;Q924W6	1;1;1;1;1;1;1	1;1;1;1;1;1;1	1;1;1;1;1;1;1	Tripartite motif-containing protein 66	Trim66	;;;;;;	7	1	1	1	1	0	0	0	0	0	0	0	1	1	0	0	0	0	0	0	0	1	1	0	0	0	0	0	0	0	1	2	2	2	135.67	1233	1233;1233;1242;1344;1344;1209;1242	1	-2	By matching
Q14BR4;Q9DD04;P61750;P84084;D3YV25;F6UFB9;E9Q2C2;E9Q798	Q14BR4;Q9DD04;P61750;P84084	3;3;3;2;1;1;1;1	3;3;3;2;1;1;1;1	1;1;1;0;0;1;0;1	ADP-ribosylation factor 4;ADP-ribosylation factor 5	Arf4;Arf5	;;;	8	3	3	1	1	0	0	0	0	0	0	0	3	1	0	0	0	0	0	0	0	3	0	0	0	0	0	0	0	0	1	26.1	26.1	8.3	20.396	180	180;181;180;180;49;60;64;153	0	8.3647	By MS/MS
Q6ZQ38;Q3UMI9	Q6ZQ38;Q3UMI9	2;1	2;1	2;1	Cullin-associated NEDD8-dissociated protein 1	Cand1	;	2	2	2	2	1	0	0	0	0	0	0	0	1	1	0	0	0	0	0	0	0	1	1	0	0	0	0	0	0	0	1	2.1	2.1	2.1	136.33	1230	1230;700	0	4.9156	By MS/MS
S4R256;S4R2A9;Q3UPL0-2;Q3UPL0	S4R256;S4R2A9;Q3UPL0-2;Q3UPL0	1;1;1;1	1;1;1;1	1;1;1;1	Protein transport protein Sec31A	Sec31a	;;;	4	1	1	1	1	0	0	0	0	0	0	0	1	1	0	0	0	0	0	0	0	1	1	0	0	0	0	0	0	0	1	4.4	4.4	4.4	39.35	364	364;934;1191;1230	0	2.4254	By MS/MS
Q80TA9	Q80TA9	1	1	1	Ectopic P granules protein 5 homolog	Epg5		1	1	1	1	1	1	1	0	0	1	0	1	0	1	1	1	0	0	1	0	1	0	1	1	1	0	0	1	0	1	0	0.5	0.5	0.5	290.8	2572	2572	0.0080321	1.182	By matching	By matching	By matching
B7ZWL9;B2RXT5;P06745	B7ZWL9;B2RXT5;P06745	2;2;2	1;1;1	1;1;1	Glucose-6-phosphate isomerase	Gpi1;Gpi	;;	3	2	1	1	1	0	0	0	0	1	0	1	0	0	0	0	0	0	0	0	1	0	0	0	0	0	0	0	0	1	0	9.3	4.9	4.9	38.341	344	344;344;558	0	3.0805	By matching
P40142;O55021	P40142;O55021	2;1	2;1	2;1	Transketolase	Tkt	;	2	2	2	2	1	0	0	0	0	1	0	1	0	1	0	0	0	0	1	0	1	0	1	0	0	0	0	1	0	1	0	4.2	4.2	4.2	67.63	623	623;28	0	8.0993	By MS/MS
Q8BKE0;Q9CZ58;Q3UWT6;P49722	Q8BKE0;Q9CZ58;Q3UWT6;P49722	2;2;2;2	2;2;2;2	2;2;2;2	Proteasome subunit alpha type;Proteasome subunit alpha type-2	Psma2	;;;	4	2	2	2	1	1	1	2	0	1	0	2	0	1	1	1	2	0	1	0	2	0	1	1	1	2	0	1	0	2	0	16.4	16.4	16.4	20.786	183	183;234;247;234	0	3.8612	By matching	By MS/MS	By MS/MS
Q80WS3	Q80WS3	1	1	1	rRNA/tRNA 2-O-methyltransferase fibrillarin-like protein 1	Fbll1		1	1	1	1	1	0	1	0	1	0	0	1	0	1	0	1	0	1	0	0	1	0	1	0	1	0	1	0	0	1	0	2.2	2.2	2.2	33.338	314	314	1	-2	By MS/MS		By MS/MS
Q91Z61	Q91Z61	1	1	1	GTP-binding protein Di-Ras1	Diras1		1	1	1	1	1	1	1	0	0	0	0	1	0	1	1	1	0	0	0	0	1	0	1	1	1	0	0	0	0	1	0	5.1	5.1	5.1	22.264	198	198	0.0099404	1.142	By matching	By MS/MS	By MS/MS
Q3URM4;Q9D1Q6	Q3URM4;Q9D1Q6	2;2	2;2	2;2	Endoplasmic reticulum resident protein 44	Erp44	;	2	2	2	2	1	0	0	0	0	0	0	1	0	1	0	0	0	0	0	0	1	0	1	0	0	0	0	0	0	1	0	6.7	6.7	6.7	46.746	406	406;406	0.0023641	2.0135	By MS/MS
Q5NCU4;Q5NCU5;Q3TXI6;P07214	Q5NCU4;Q5NCU5;Q3TXI6;P07214	2;2;2;2	2;2;2;2	2;2;2;2	SPARC	Sparc	;;;	4	2	2	2	1	0	1	0	1	1	1	0	0	1	0	1	0	1	1	1	0	0	1	0	1	0	1	1	1	0	0	8	8	8	34.322	301	301;302;302;302	0	7.2669	By matching		By MS/MS
Q8K2T2;Q8C6G3;W0UVC3;P00683	Q8K2T2;Q8C6G3;W0UVC3;P00683	2;2;2;2	2;2;2;2	2;2;2;2	Ribonuclease pancreatic	Rnase1;Rac1	;;;	4	2	2	2	1	0	0	2	1	2	1	0	0	1	0	0	2	1	2	1	0	0	1	0	0	2	1	2	1	0	0	18.1	18.1	18.1	16.804	149	149;149;191;149	0.0023041	1.8767	By matching
Q99KE8-3;A2AQR4	Q99KE8-3;A2AQR4	1;1	1;1	1;1		Zfp64	;	2	1	1	1	1	0	1	0	1	1	1	0	0	1	0	1	0	1	1	1	0	0	1	0	1	0	1	1	1	0	0	2.7	2.7	2.7	53.316	473	473;676	0	2.7051	By MS/MS		By MS/MS
Q3V0F6	Q3V0F6	2	2	2		Gm7337		1	2	2	2	1	1	1	1	0	1	1	0	0	1	1	1	1	0	1	1	0	0	1	1	1	1	0	1	1	0	0	9.9	9.9	9.9	44.925	385	385	1	-2	By matching	By MS/MS	By matching
Q501L5;O35103;Q8C7G2	Q501L5;O35103	3;3;1	3;3;1	3;3;1	Osteomodulin	Omd	;	3	3	3	3	1	0	2	0	2	1	0	0	0	1	0	2	0	2	1	0	0	0	1	0	2	0	2	1	0	0	0	5.9	5.9	5.9	49.729	423	423;423;209	0.0096339	1.0401	By matching		By MS/MS
Q3TE53;Q3UHP6;P59672;P59672-2	Q3TE53;Q3UHP6;P59672;P59672-2	1;1;1;1	1;1;1;1	1;1;1;1	Ankyrin repeat and SAM domain-containing protein 1A	Anks1;Anks1a	;;;	4	1	1	1	1	0	0	1	0	1	0	0	0	1	0	0	1	0	1	0	0	0	1	0	0	1	0	1	0	0	0	2.6	2.6	2.6	55.056	494	494;1189;1150;1168	1	-2	By MS/MS
Q3UN37;B2RVF4;H3BKF1;E9PYM1;E9Q0Z5;D3YWC7	Q3UN37;B2RVF4;H3BKF1;E9PYM1;E9Q0Z5;D3YWC7	1;1;1;1;1;1	1;1;1;1;1;1	1;1;1;1;1;1		Fam47e	;;;;;	6	1	1	1	1	1	1	1	0	1	0	0	0	1	1	1	1	0	1	0	0	0	1	1	1	1	0	1	0	0	0	9.9	9.9	9.9	11.797	101	101;101;121;199;260;402	1	-2	By matching	By matching	By MS/MS
G3X9K3	G3X9K3	1	1	1	Brefeldin A-inhibited guanine nucleotide-exchange protein 1	Arfgef1		1	1	1	1	1	1	1	1	0	1	0	0	0	1	1	1	1	0	1	0	0	0	1	1	1	1	0	1	0	0	0	0.8	0.8	0.8	208.5	1846	1846	1	-2	By MS/MS	By MS/MS	By MS/MS
G3UWN9;G3UXY0;G3X9K9;G3UXZ5;Q5HZK3;P97371	G3UWN9;G3UXY0;G3X9K9;G3UXZ5;Q5HZK3;P97371	1;1;1;1;1;1	1;1;1;1;1;1	1;1;1;1;1;1	Proteasome activator complex subunit 1	Psme1	;;;;;	6	1	1	1	1	1	1	0	0	1	0	0	0	1	1	1	0	0	1	0	0	0	1	1	1	0	0	1	0	0	0	6.9	6.9	6.9	19.774	173	173;226;236;238;249;249	0.009901	1.1311	By MS/MS	By matching	By matching
Q3TGB1;Q9CQ26	Q3TGB1;Q9CQ26	1;1	1;1	1;1	STAM-binding protein	Stambp	;	2	1	1	1	1	1	1	0	0	1	0	0	0	1	1	1	0	0	1	0	0	0	1	1	1	0	0	1	0	0	0	3.3	3.3	3.3	48.553	424	424;424	1	-2	By MS/MS	By matching	By matching
K3W4N7;A0A0R4J1M7;Q9JJV9-2;Q9JJV9	K3W4N7;A0A0R4J1M7;Q9JJV9-2;Q9JJV9	1;1;1;1	1;1;1;1	1;1;1;1	Sodium channel protein;Sodium channel protein type 5 subunit alpha	Scn5a	;;;	4	1	1	1	1	0	1	0	0	1	0	0	0	1	0	1	0	0	1	0	0	0	1	0	1	0	0	1	0	0	0	0.9	0.9	0.9	227.7	2020	2020;2020;2019;2019	1	-2	By MS/MS		By matching
Q78IK2	Q78IK2	1	1	1	Up-regulated during skeletal muscle growth protein 5	Usmg5		1	1	1	1	1	0	0	0	0	1	0	0	0	1	0	0	0	0	1	0	0	0	1	0	0	0	0	1	0	0	0	25.9	25.9	25.9	6.3814	58	58	0.0066815	1.5608	By MS/MS
F6WHQ7;A2AE89;P10649	F6WHQ7;A2AE89;P10649	1;1;1	1;1;1	1;1;1	Glutathione S-transferase Mu 1	Gstm1	;;	3	1	1	1	1	0	0	0	0	1	0	0	0	1	0	0	0	0	1	0	0	0	1	0	0	0	0	1	0	0	0	6.2	6.2	6.2	22.587	194	194;244;218	0.0023419	1.9545	By MS/MS
P05201	P05201	1	1	1	Aspartate aminotransferase, cytoplasmic	Got1		1	1	1	1	1	0	0	0	0	1	0	0	0	1	0	0	0	0	1	0	0	0	1	0	0	0	0	1	0	0	0	3.1	3.1	3.1	46.247	413	413	0	2.3028	By MS/MS
Q9CRJ5;Q3UJU6;Q9CQW4;Q3UA25;Q5M9L9;Q497E9;P62242	Q9CRJ5;Q3UJU6;Q9CQW4;Q3UA25;Q5M9L9;Q497E9;P62242	1;1;1;1;1;1;1	1;1;1;1;1;1;1	1;1;1;1;1;1;1	40S ribosomal protein S8	Rps8	;;;;;;	7	1	1	1	1	0	0	0	0	1	0	0	0	1	0	0	0	0	1	0	0	0	1	0	0	0	0	1	0	0	0	11	11	11	15.881	136	136;142;150;152;208;208;208	0.0022883	1.8289	By MS/MS
Q4KML8;A0A0R4IZW5;P09803	Q4KML8;A0A0R4IZW5;P09803	1;1;1	1;1;1	1;1;1	Cadherin-1;E-Cad/CTF1;E-Cad/CTF2;E-Cad/CTF3	Cdh1	;;	3	1	1	1	1	0	0	0	0	1	0	0	0	1	0	0	0	0	1	0	0	0	1	0	0	0	0	1	0	0	0	1.6	1.6	1.6	98.255	884	884;884;884	0	3.1917	By MS/MS
Q3TQP7;Q8QZT1	Q3TQP7;Q8QZT1	1;1	1;1	1;1	Acetyl-CoA acetyltransferase, mitochondrial	Acat1	;	2	1	1	1	1	0	0	0	0	1	0	0	0	1	0	0	0	0	1	0	0	0	1	0	0	0	0	1	0	0	0	3.1	3.1	3.1	44.802	424	424;424	0.0065646	1.482	By MS/MS
Q8CJ40-2;Q8CJ40-3;Q8CJ40	Q8CJ40-2;Q8CJ40-3;Q8CJ40	1;1;1	1;1;1	1;1;1	Rootletin	Crocc	;;	3	1	1	1	1	0	0	0	0	1	0	0	0	1	0	0	0	0	1	0	0	0	1	0	0	0	0	1	0	0	0	0.8	0.8	0.8	208.27	1845	1845;1988;2009	0	2.3883	By MS/MS
Q8R016;E9PY26	Q8R016;E9PY26	2;1	2;1	2;1	Bleomycin hydrolase	Blmh	;	2	2	2	2	1	2	1	1	0	2	0	0	0	1	2	1	1	0	2	0	0	0	1	2	1	1	0	2	0	0	0	5.3	5.3	5.3	52.511	455	455;179	0	8.9551	By MS/MS	By MS/MS	By matching
A0A0U1RPX7;A0A0R4J113;Q5MJ56;P97479-2;P97479	A0A0U1RPX7;A0A0R4J113;Q5MJ56;P97479-2;P97479	1;1;1;1;1	1;1;1;1;1	1;1;1;1;1	Unconventional myosin-VIIa	Myo7a	;;;;	5	1	1	1	1	0	0	1	0	1	0	0	0	1	0	0	1	0	1	0	0	0	1	0	0	1	0	1	0	0	0	0.7	0.7	0.7	249.53	2164	2164;2166;2172;2177;2215	1	-2	By matching
Q8C4K6;Q32ME9;Q2VPA9;P55849-2;P55849	Q8C4K6;Q32ME9;Q2VPA9;P55849-2;P55849	1;1;1;1;1	1;1;1;1;1	1;1;1;1;1	Desmocollin-1	Dsc1	;;;;	5	1	1	1	1	1	0	1	0	1	0	0	0	1	1	0	1	0	1	0	0	0	1	1	0	1	0	1	0	0	0	0.8	0.8	0.8	92.741	832	832;832;863;839;886	0.0062762	1.2736	By MS/MS	By MS/MS
Q9Z2L2;D3YZ06;Q545F4;P14602-3;P14602-2;P14602	Q9Z2L2;D3YZ06;Q545F4;P14602-3;P14602-2;P14602	2;1;1;1;1;1	2;1;1;1;1;1	2;1;1;1;1;1	Heat shock protein beta-1	Hspb1	;;;;;	6	2	2	2	1	1	0	0	0	2	0	0	0	1	1	0	0	0	2	0	0	0	1	1	0	0	0	2	0	0	0	30.5	30.5	30.5	9.4115	82	82;147;209;175;197;209	0	3.169	By MS/MS	By MS/MS
Q3U131;Q811C8;A0A5E1;Q3UFA6;F8WH23;Q61581;E9Q5D9	Q3U131;Q811C8;A0A5E1;Q3UFA6;F8WH23;Q61581;E9Q5D9	3;3;3;3;3;3;2	3;3;3;3;3;3;2	3;3;3;3;3;3;2	Insulin-like growth factor-binding protein 7	Igfbp7	;;;;;;	7	3	3	3	1	0	0	0	0	3	0	0	0	1	0	0	0	0	3	0	0	0	1	0	0	0	0	3	0	0	0	17.4	17.4	17.4	26.427	253	253;263;281;282;282;281;313	0	2.1089	By matching
Q3UWH6;Q9D0C0;Q543M3;Q3UHZ4;Q3U5U9;Q3TVJ1;Q3TT75;Q3TNC8;P06797;Q6LAF5	Q3UWH6;Q9D0C0;Q543M3;Q3UHZ4;Q3U5U9;Q3TVJ1;Q3TT75;Q3TNC8;P06797;Q6LAF5	2;2;2;2;2;2;2;2;2;1	2;2;2;2;2;2;2;2;2;1	2;2;2;2;2;2;2;2;2;1	Cathepsin L1;Cathepsin L1 heavy chain;Cathepsin L1 light chain	Ctsl	;;;;;;;;;	10	2	2	2	1	0	0	0	0	2	0	0	0	1	0	0	0	0	2	0	0	0	1	0	0	0	0	2	0	0	0	11.7	11.7	11.7	34.771	308	308;334;334;334;334;334;334;334;334;168	0	6.8017	By matching
A0A0A0MQ97;G3X9C2	A0A0A0MQ97;G3X9C2	1;1	1;1	1;1	F-box only protein 50	Nccrp1	;	2	1	1	1	1	0	0	0	0	1	0	0	0	1	0	0	0	0	1	0	0	0	1	0	0	0	0	1	0	0	0	3.8	3.8	3.8	33.027	291	291;266	0.00998	1.159	By matching
Q8C1X9;Q3U737;Q3TLP4;Q3TFK4;O35639;A0A0G2JDV9;Q3TET3	Q8C1X9;Q3U737;Q3TLP4;Q3TFK4;O35639;A0A0G2JDV9;Q3TET3	2;2;2;2;2;1;1	2;2;2;2;2;1;1	2;2;2;2;2;1;1	Annexin;Annexin A3	Anxa3	;;;;;;	7	2	2	2	1	0	0	0	0	2	0	0	0	1	0	0	0	0	2	0	0	0	1	0	0	0	0	2	0	0	0	7.4	7.4	7.4	36.356	323	323;323;323;323;323;78;180	0	3.8647	By matching
Q3UPK6;Q3TUX3;Q3TUI9;D3YX79;Q9Z2U1	Q3UPK6;Q3TUX3;Q3TUI9;D3YX79;Q9Z2U1	1;1;1;1;1	1;1;1;1;1	1;1;1;1;1	Proteasome subunit alpha type;Proteasome subunit alpha type-5	Psma5;Gm8394	;;;;	5	1	1	1	1	0	0	0	0	1	0	0	0	1	0	0	0	0	1	0	0	0	1	0	0	0	0	1	0	0	0	7.9	7.9	7.9	26.411	241	241;241;241;241;241	0.0023095	1.881	By matching
G5E8D1;A9JTY7;O70562;O70558;O70555;O70554;O70559	G5E8D1;A9JTY7;O70562;O70558;O70555;O70554;O70559	1;1;1;1;1;1;1	1;1;1;1;1;1;1	1;1;1;1;1;1;1	Small proline-rich protein 2K;Small proline-rich protein 2G;Small proline-rich protein 2D;Small proline-rich protein 2B;Small proline-rich protein 2H	Sprr2k;Sprr2b;Sprr2g;Sprr2d;Sprr2h	;;;;;;	7	1	1	1	1	0	0	0	0	1	0	0	0	1	0	0	0	0	1	0	0	0	1	0	0	0	0	1	0	0	0	13.2	13.2	13.2	7.559	68	68;98;68;76;85;98;108	0	2.1029	By MS/MS
Q3UEN1;Q8R093;Q8CGR7	Q3UEN1;Q8R093;Q8CGR7	1;1;1	1;1;1	1;1;1	Uridine phosphorylase;Uridine phosphorylase 2	Upp2	;;	3	1	1	1	1	0	0	0	0	1	0	0	0	1	0	0	0	0	1	0	0	0	1	0	0	0	0	1	0	0	0	4.1	4.1	4.1	35.755	320	320;338;320	1	-2	By MS/MS
P97350	P97350	2	2	2	Plakophilin-1	Pkp1		1	2	2	2	1	0	0	0	0	2	0	0	0	1	0	0	0	0	2	0	0	0	1	0	0	0	0	2	0	0	0	3	3	3	80.895	728	728	0	20.099	By MS/MS
D3YV69;Q3U4W5;Q0PD54;Q0PD53;Q0PD15;P61294;P35279-2;P35279;Q8BHD0	D3YV69;Q3U4W5;Q0PD54;Q0PD53;Q0PD15;P61294;P35279-2;P35279;Q8BHD0	1;1;1;1;1;1;1;1;1	1;1;1;1;1;1;1;1;1	1;1;1;1;1;1;1;1;1	Ras-related protein Rab-6B;Ras-related protein Rab-6A;Ras-related protein Rab-39A	Rab6a;Rab6b;Rab39;Rab39a	;;;;;;;;	9	1	1	1	1	0	0	0	0	1	0	0	0	1	0	0	0	0	1	0	0	0	1	0	0	0	0	1	0	0	0	6.3	6.3	6.3	19.961	175	175;208;208;208;217;208;208;208;217	0	8.9533	By MS/MS
Q91VR8	Q91VR8	1	1	1	Protein BRICK1	Brk1		1	1	1	1	1	1	1	0	1	0	0	0	0	1	1	1	0	1	0	0	0	0	1	1	1	0	1	0	0	0	0	9.3	9.3	9.3	8.7608	75	75	0	3.0632	By matching	By matching	By matching
Q8CHR4;O35619;B0QZN5;P63024;P63044	Q8CHR4;O35619;B0QZN5;P63024;P63044	1;1;1;1;1	1;1;1;1;1	1;1;1;1;1	Vesicle-associated membrane protein 3;Vesicle-associated membrane protein 2	Vamp2;Vamp3	;;;;	5	1	1	1	1	0	0	0	0	0	0	0	0	1	0	0	0	0	0	0	0	0	1	0	0	0	0	0	0	0	0	14.7	14.7	14.7	12.691	116	116;116;163;103;116	0	2.995	By MS/MS
Q5HZY7;Q3U7E0;Q9CR51	Q5HZY7;Q3U7E0;Q9CR51	1;1;1	1;1;1	1;1;1	V-type proton ATPase subunit G 1	Atp6v1g1	;;	3	1	1	1	1	0	0	0	0	0	0	0	0	1	0	0	0	0	0	0	0	0	1	0	0	0	0	0	0	0	0	12.7	12.7	12.7	13.724	118	118;118;118	0	2.4948	By MS/MS
M0QWX7;A2RSV8;P19783	M0QWX7;A2RSV8;P19783	1;1;1	1;1;1	1;1;1	Cytochrome c oxidase subunit 4 isoform 1, mitochondrial	Cox4i1	;;	3	1	1	1	1	0	0	0	0	0	0	0	0	1	0	0	0	0	0	0	0	0	1	0	0	0	0	0	0	0	0	13	13	13	10.846	92	92;169;169	0.0023529	1.996	By MS/MS
Q9DAM4;Q80X68;Q9CZU6	Q9DAM4;Q80X68;Q9CZU6	1;1;1	1;1;1	1;1;1	Citrate synthase;Citrate synthase, mitochondrial	Csl;Cs	;;	3	1	1	1	1	0	0	0	0	0	0	0	0	1	0	0	0	0	0	0	0	0	1	0	0	0	0	0	0	0	0	3.4	3.4	3.4	52.353	466	466;466;464	0.0023148	1.8848	By MS/MS
Q3UBF4;Q3U8R9;Q3UNH3;Q8CDN6	Q3UBF4;Q3U8R9;Q3UNH3;Q8CDN6	1;1;1;1	1;1;1;1	1;1;1;1	Thioredoxin-like protein 1	Txnl1	;;;	4	1	1	1	1	0	0	0	0	0	0	0	0	1	0	0	0	0	0	0	0	0	1	0	0	0	0	0	0	0	0	5.2	5.2	5.2	32.328	289	289;289;301;289	0.0023364	1.9305	By MS/MS
P38647	P38647	1	1	1	Stress-70 protein, mitochondrial	Hspa9		1	1	1	1	1	0	0	0	0	0	0	0	0	1	0	0	0	0	0	0	0	0	1	0	0	0	0	0	0	0	0	1.8	1.8	1.8	73.46	679	679	0.0063025	1.2909	By MS/MS
Q50HX3;Q50HX1;Q50HW9;Q50HX4;Q50HX2;Q50HX0;Q91V41	Q50HX3;Q50HX1;Q50HW9;Q50HX4;Q50HX2;Q50HX0;Q91V41	1;1;1;1;1;1;1	1;1;1;1;1;1;1	1;1;1;1;1;1;1	Ras-related protein Rab-14	Rab14	;;;;;;	7	1	1	1	1	0	0	0	0	0	0	0	0	1	0	0	0	0	0	0	0	0	1	0	0	0	0	0	0	0	0	7.1	7.1	7.1	21.888	197	197;197;197;215;215;215;215	0.0097847	1.0802	By MS/MS
Q3TEG5;E9Q6L3;A0A0R4J1L8;E9QMT1;F6R307;F6RT60;A0A0R4J023;Q9JLZ3-3;Q9JLZ3-2;Q9JLZ3	Q3TEG5;E9Q6L3;A0A0R4J1L8;E9QMT1;F6R307;F6RT60;A0A0R4J023;Q9JLZ3-3;Q9JLZ3-2;Q9JLZ3	1;1;1;1;1;1;1;1;1;1	1;1;1;1;1;1;1;1;1;1	1;1;1;1;1;1;1;1;1;1	Methylglutaconyl-CoA hydratase, mitochondrial	Auh	;;;;;;;;;	10	1	1	1	1	0	0	0	0	0	0	0	0	1	0	0	0	0	0	0	0	0	1	0	0	0	0	0	0	0	0	11.3	11.3	11.3	12.341	115	115;115;144;158;219;239;314;144;158;314	0	2.2635	By MS/MS
Q3ULW0;Q14AA6;A6H622;Q61820;P62827	Q3ULW0;Q14AA6;A6H622;Q61820;P62827	1;1;1;1;1	1;1;1;1;1	1;1;1;1;1	GTP-binding nuclear protein Ran, testis-specific isoform;GTP-binding nuclear protein Ran	Ran;1700009N14Rik;Rasl2-9	;;;;	5	1	1	1	1	0	0	0	0	0	0	0	0	1	0	0	0	0	0	0	0	0	1	0	0	0	0	0	0	0	0	5.1	5.1	5.1	24.351	216	216;216;216;216;216	0.0098619	1.1226	By MS/MS
Q3UG68;Q3UC51;O54734	Q3UG68;Q3UC51;O54734	1;1;1	1;1;1	1;1;1	Dolichyl-diphosphooligosaccharide--protein glycosyltransferase 48 kDa subunit	Ddost	;;	3	1	1	1	1	0	0	0	0	0	0	0	0	1	0	0	0	0	0	0	0	0	1	0	0	0	0	0	0	0	0	2	2	2	48.985	441	441;441;441	0	3.0133	By MS/MS
Q4FJX9;Q3U8W4;P09671	Q4FJX9;Q3U8W4;P09671	1;1;1	1;1;1	1;1;1	Superoxide dismutase;Superoxide dismutase [Mn], mitochondrial	Sod2	;;	3	1	1	1	1	0	0	0	0	0	0	0	0	1	0	0	0	0	0	0	0	0	1	0	0	0	0	0	0	0	0	6.3	6.3	6.3	24.603	222	222;222;222	0.0023474	1.9849	By MS/MS
Q80U51;F6SLR4;Q9ER58;Q6PAN0	Q80U51;F6SLR4;Q9ER58;Q6PAN0	4;4;4;2	4;4;4;2	4;4;4;2	Testican-2	Spock2	;;;	4	4	4	4	2	0	0	0	1	4	1	1	1	2	0	0	0	1	4	1	1	1	2	0	0	0	1	4	1	1	1	15.3	15.3	15.3	42.415	380	380;423;423;321	0	9.1837	By MS/MS
P97298	P97298	5	1	1	Pigment epithelium-derived factor	Serpinf1		1	5	1	1	2	4	3	4	5	3	5	5	4	0	0	0	0	1	0	1	1	0	0	0	0	0	1	0	1	1	0	15.3	4.3	4.3	46.233	417	417	0	8.0734	By matching	By matching	By matching
Q546G4;P07724;K7R066	Q546G4;P07724;K7R066	4;4;2	2;2;1	2;2;1	Serum albumin	Alb	;;	3	4	2	2	2	1	3	2	2	2	2	2	2	1	0	2	1	1	0	1	1	1	1	0	2	1	1	0	1	1	1	7.4	3.6	3.6	68.692	608	608;608;171	0	2.4905	By MS/MS	By matching	By matching
E9Q7H5;Q6PFA7;B2RXM2;Q0VG47;J3QNY1;Q8BG05-2;Q6P6I7;A2AL12;Q5FB19;Q3UZG3;Q8BG05;Q5U3M2;Q58E39;V9GX38	E9Q7H5;Q6PFA7;B2RXM2;Q0VG47;J3QNY1;Q8BG05-2;Q6P6I7;A2AL12;Q5FB19;Q3UZG3;Q8BG05;Q5U3M2	4;4;4;4;4;4;3;3;3;3;3;2;1;1	4;4;4;4;4;4;3;3;3;3;3;2;1;1	4;4;4;4;4;4;3;3;3;3;3;2;1;1	Heterogeneous nuclear ribonucleoprotein A3	Gm8991;Hnrnpa3;Gm6793;Gm9242	;;;;;;;;;;;	14	4	4	4	2	0	0	0	0	1	1	1	3	2	0	0	0	0	1	1	1	3	2	0	0	0	0	1	1	1	3	15.3	15.3	15.3	32.574	300	300;303;351;357;357;357;318;318;379;379;379;313;263;357	0	2.9428	By MS/MS
A0A0A0MQM0;P63242;Q8BGY2;Q8VHU9;J3QPS8	A0A0A0MQM0;P63242;Q8BGY2	3;3;2;1;1	3;3;2;1;1	2;2;1;0;1	Eukaryotic translation initiation factor 5A;Eukaryotic translation initiation factor 5A-1;Eukaryotic translation initiation factor 5A-2	Eif5a;Eif5a2	;;	5	3	3	2	2	0	0	0	1	2	0	1	2	2	0	0	0	1	2	0	1	2	2	0	0	0	0	2	0	1	1	22.1	22.1	16.8	16.302	149	149;154;153;61;76	0.006383	1.3182	By MS/MS
P68510	P68510	3	1	1	14-3-3 protein eta	Ywhah		1	3	1	1	2	1	1	2	1	2	1	2	2	0	0	0	0	0	0	0	1	1	0	0	0	0	0	0	0	1	1	13.4	6.1	6.1	28.211	246	246	0	2.1308	By matching	By matching	By matching
P97807-2;P97807;H3BKG7	P97807-2;P97807	5;5;2	5;5;2	5;5;2	Fumarate hydratase, mitochondrial	Fh	;	3	5	5	5	2	0	0	1	1	1	1	4	2	2	0	0	1	1	1	1	4	2	2	0	0	1	1	1	1	4	2	21.8	21.8	21.8	50.052	467	467;507;167	0	14.183	By MS/MS
Q5RKP4;Q8BMR3;Q3U900;Q91YQ5;Q99LY0	Q5RKP4;Q8BMR3;Q3U900;Q91YQ5;Q99LY0	3;3;3;3;2	3;3;3;3;2	3;3;3;3;2	Dolichyl-diphosphooligosaccharide--protein glycosyltransferase subunit 1	Rpn1	;;;;	5	3	3	3	2	0	1	0	1	1	1	1	1	2	0	1	0	1	1	1	1	1	2	0	1	0	1	1	1	1	1	5.4	5.4	5.4	68.396	607	607;608;608;608;280	0.0064935	1.3922	By MS/MS		By MS/MS
Q8VC94;A2BH06;E9PZB3;E9PYL9;Q9CXW4	Q8VC94;A2BH06;E9PZB3;E9PYL9;Q9CXW4	2;2;2;2;2	2;2;2;2;2	2;2;2;2;2	60S ribosomal protein L11	Rpl11;Gm5093;Gm10036	;;;;	5	2	2	2	2	0	0	1	1	2	1	1	2	2	0	0	1	1	2	1	1	2	2	0	0	1	1	2	1	1	2	12.6	12.6	12.6	19.024	167	167;172;174;178;178	0	5.3635	By MS/MS
F8WIX8;A0A0N4SV66;A0AUV1;A3KPD0;Q8CGP4;Q149V4;B2RWH3;B2RVF0;A2AB79;Q8CGP6;Q8R1M2;Q64523;Q8CGP7;Q8CGP5;Q8BFU2;Q6GSS7;P22752;B2RVP5;Q3THW5;P0C0S6;P27661;Q61668;G3UWL7;Q8R029;Q3TFU6;Q3UA95;Q64522	F8WIX8;A0A0N4SV66;A0AUV1;A3KPD0;Q8CGP4;Q149V4;B2RWH3;B2RVF0;A2AB79;Q8CGP6;Q8R1M2;Q64523;Q8CGP7;Q8CGP5;Q8BFU2;Q6GSS7;P22752;B2RVP5;Q3THW5;P0C0S6;P27661	3;3;3;3;3;3;3;3;3;3;3;3;3;3;3;3;3;2;2;2;2;1;1;1;1;1;1	3;3;3;3;3;3;3;3;3;3;3;3;3;3;3;3;3;2;2;2;2;1;1;1;1;1;1	3;3;3;3;3;3;3;3;3;3;3;3;3;3;3;3;3;2;2;2;2;1;1;1;1;1;1	Histone H2A;Histone H2A type 1-H;Histone H2A.J;Histone H2A type 2-C;Histone H2A type 1-K;Histone H2A type 1-F;Histone H2A type 3;Histone H2A type 2-A;Histone H2A type 1;Histone H2A.V;Histone H2A.Z;Histone H2AX	Hist1h2al;Hist1h2ah;Hist1h2aa;Hist2h2ac;Hist2h2aa1;Hist1h2ad;Hist3h2a;H2afj;Hist1h2ak;Hist1h2af;Hist1h2ab;H2afv;H2afz;H2afx	;;;;;;;;;;;;;;;;;;;;	27	3	3	3	2	1	1	2	1	3	1	2	1	2	1	1	2	1	3	1	2	1	2	1	1	2	1	3	1	2	1	28	28	28	13.607	125	125;126;127;128;129;129;130;130;130;128;129;129;130;130;130;130;130;128;128;128;143;37;87;90;90;105;130	0	6.2244	By MS/MS	By MS/MS	By MS/MS
Q9WVA4;A0A0A6YXG6	Q9WVA4	3;1	3;1	3;1	Transgelin-2	Tagln2		2	3	3	3	2	1	1	0	2	2	2	3	2	2	1	1	0	2	2	2	3	2	2	1	1	0	2	2	2	3	2	18.1	18.1	18.1	22.395	199	199;90	0	29.228	By MS/MS	By matching	By matching
Q32MU0;P63239;Q8BRQ2	Q32MU0;P63239	8;8;3	8;8;3	8;8;3	Neuroendocrine convertase 1	Pcsk1	;	3	8	8	8	2	0	0	2	0	3	3	7	2	2	0	0	2	0	3	3	7	2	2	0	0	2	0	3	3	7	2	16.1	16.1	16.1	84.173	753	753;753;247	0	28.811	By MS/MS
Q64727;Q3TEB0	Q64727	16;1	16;1	16;1	Vinculin	Vcl		2	16	16	16	2	4	2	2	9	0	9	5	4	2	4	2	2	9	0	9	5	4	2	4	2	2	9	0	9	5	4	23.7	23.7	23.7	116.72	1066	1066;379	0	100.86	By MS/MS	By MS/MS	By MS/MS
E9Q1Y3;E9Q414	E9Q1Y3;E9Q414	5;5	3;3	3;3	Apolipoprotein B-100;Apolipoprotein B-48	Apob	;	2	5	3	3	2	2	2	2	5	0	4	5	5	2	1	1	1	3	0	2	3	3	2	1	1	1	3	0	2	3	3	1.1	0.7	0.7	503.9	4456	4456;4505	0	10.668	By MS/MS	By MS/MS	By MS/MS
Q3TND1;P45878;Q3UND3	Q3TND1;P45878;Q3UND3	2;2;1	2;2;1	2;2;1	Peptidyl-prolyl cis-trans isomerase;Peptidyl-prolyl cis-trans isomerase FKBP2	Fkbp2	;;	3	2	2	2	2	0	1	1	0	1	0	2	2	2	0	1	1	0	1	0	2	2	2	0	1	1	0	1	0	2	2	18.6	18.6	18.6	15.344	140	140;140;140	0	11.962	By MS/MS		By matching
P61458	P61458	2	2	2	Pterin-4-alpha-carbinolamine dehydratase	Pcbd1		1	2	2	2	2	0	2	0	0	1	0	2	2	2	0	2	0	0	1	0	2	2	2	0	2	0	0	1	0	2	2	17.3	17.3	17.3	11.985	104	104	0	3.0283	By MS/MS		By MS/MS
O08553	O08553	4	4	4	Dihydropyrimidinase-related protein 2	Dpysl2		1	4	4	4	2	0	0	0	0	1	0	2	1	2	0	0	0	0	1	0	2	1	2	0	0	0	0	1	0	2	1	14.2	14.2	14.2	62.277	572	572	0	4.7161	By MS/MS
Q61171;D3Z4A4;Q5M9N9	Q61171;D3Z4A4;Q5M9N9	5;3;3	5;3;3	5;3;3	Peroxiredoxin-2	Prdx2	;;	3	5	5	5	2	1	0	1	1	2	0	2	2	2	1	0	1	1	2	0	2	2	2	1	0	1	1	2	0	2	2	39.9	39.9	39.9	21.778	198	198;147;198	0	16.723	By MS/MS	By MS/MS
Q3UZU8;Q3TY66;P16014;Q8BP91;Q3UZP2;Q9CTW1	Q3UZU8;Q3TY66;P16014;Q8BP91;Q3UZP2	5;5;5;4;3;2	5;5;5;4;3;2	5;5;5;4;3;2	Secretogranin-1;CCB peptide;PE-11	Chgb	;;;;	6	5	5	5	2	0	0	2	0	4	0	3	3	2	0	0	2	0	4	0	3	3	2	0	0	2	0	4	0	3	3	10.8	10.8	10.8	77.779	676	676;677;677;677;430;206	0	35.362	By MS/MS
Q91WD9	Q91WD9	2	2	2	Secretagogin	Scgn		1	2	2	2	2	0	1	0	0	0	0	1	1	2	0	1	0	0	0	0	1	1	2	0	1	0	0	0	0	1	1	12	12	12	32.145	276	276	0	4.5505	By MS/MS		By matching
Q3TCL2;Q5U415;Q3UDY1;P45376;D3YVJ7;Q3ULP0	Q3TCL2;Q5U415;Q3UDY1;P45376;D3YVJ7;Q3ULP0	3;3;3;3;2;2	3;3;3;3;2;2	3;3;3;3;2;2	Aldose reductase	Akr1b3;Akr1b1	;;;;;	6	3	3	3	2	0	0	0	0	2	0	0	1	2	0	0	0	0	2	0	0	1	2	0	0	0	0	2	0	0	1	14.8	14.8	14.8	35.051	310	310;316;316;316;176;185	0	2.493	By MS/MS
B2CY77;P14206	B2CY77;P14206	3;3	3;3	3;3	40S ribosomal protein SA	Rpsa	;	2	3	3	3	2	1	1	1	0	2	0	0	2	2	1	1	1	0	2	0	0	2	2	1	1	1	0	2	0	0	2	17.6	17.6	17.6	32.85	295	295;295	0	15.808	By MS/MS	By matching	By matching
P19157;K9JA74;Q8VC73;F6RWR5;P46425	P19157;K9JA74;Q8VC73;F6RWR5;P46425	2;1;1;1;1	2;1;1;1;1	2;1;1;1;1	Glutathione S-transferase P 1;Glutathione S-transferase P 2	Gstp1;Gstp2;BC021614	;;;;	5	2	2	2	2	0	1	0	0	2	0	0	1	2	0	1	0	0	2	0	0	1	2	0	1	0	0	2	0	0	1	12.9	12.9	12.9	23.609	210	210;188;210;210;210	0	14.437	By MS/MS		By MS/MS
Q5SZA3;Q3U292;Q149Z9;P15864;P43277;I7HFT9;Q07133;P43275	Q5SZA3;Q3U292;Q149Z9;P15864;P43277	3;3;3;3;3;1;1;1	3;3;3;3;3;1;1;1	1;1;1;1;1;0;0;0	Histone H1.2;Histone H1.3	Hist1h1c;Hist1h1d	;;;;	8	3	3	1	2	0	0	0	0	2	0	0	3	2	0	0	0	0	2	0	0	3	1	0	0	0	0	1	0	0	1	15.1	15.1	5.7	21.266	212	212;221;221;212;221;209;208;213	0	3.0804	By MS/MS
Q3U344;Q8BSL7;P84078;P61205	Q3U344;Q8BSL7;P84078;P61205	3;3;3;3	1;1;1;1	1;1;1;1	ADP-ribosylation factor 2;ADP-ribosylation factor 1;ADP-ribosylation factor 3	Arf3;Arf2;Arf1	;;;	4	3	1	1	2	0	0	0	0	0	0	0	3	1	0	0	0	0	0	0	0	1	1	0	0	0	0	0	0	0	1	26	8.3	8.3	20.601	181	181;181;181;181	0	4.1907	By MS/MS
Q642K0;Q60605-2;Q60605;Q3TIG9;Q8CI43	Q642K0;Q60605-2;Q60605;Q3TIG9;Q8CI43	2;2;2;1;1	2;2;2;1;1	2;2;2;1;1	Myosin light polypeptide 6;Myosin light chain 6B	Myl6;Myl6b	;;;;	5	2	2	2	2	0	0	0	0	1	0	0	0	2	0	0	0	0	1	0	0	0	2	0	0	0	0	1	0	0	0	17.2	17.2	17.2	16.961	151	151;151;151;105;207	0.0066667	1.5536	By MS/MS
Q497D7;Q5PR15;Q58DZ3;P62889	Q497D7;Q5PR15;Q58DZ3;P62889	2;2;2;2	2;2;2;2	2;2;2;2	60S ribosomal protein L30	Rpl30	;;;	4	2	2	2	2	0	0	0	0	2	0	0	0	2	0	0	0	0	2	0	0	0	2	0	0	0	0	2	0	0	0	24.6	24.6	24.6	12.656	114	114;115;115;115	0	3.8373	By MS/MS
Q58EA6;P62852	Q58EA6;P62852	2;2	2;2	2;2	40S ribosomal protein S25	Rps25	;	2	2	2	2	2	0	0	0	0	1	0	0	0	2	0	0	0	0	1	0	0	0	2	0	0	0	0	1	0	0	0	14.4	14.4	14.4	13.742	125	125;125	0.0064103	1.3397	By MS/MS
A0A087WS46;O70251;M0QWK5;M0QWH8;G3UX43;G3UZ47	A0A087WS46;O70251;M0QWK5;M0QWH8;G3UX43;G3UZ47	2;2;1;1;1;1	2;2;1;1;1;1	2;2;1;1;1;1	Elongation factor 1-beta	Eef1b2;Eef1b	;;;;;	6	2	2	2	2	0	0	0	0	1	0	0	0	2	0	0	0	0	1	0	0	0	2	0	0	0	0	1	0	0	0	17.9	17.9	17.9	20.136	184	184;225;43;48;68;94	0	6.5897	By MS/MS
Q4FK57;Q4FJZ3;Q8R180;Q3TXL0	Q4FK57;Q4FJZ3;Q8R180;Q3TXL0	2;2;2;1	1;1;1;1	1;1;1;1	ERO1-like protein alpha	Ero1l	;;;	4	2	1	1	2	0	0	0	0	1	0	0	0	1	0	0	0	0	0	0	0	0	1	0	0	0	0	0	0	0	0	5.4	3	3	54.084	464	464;464;464;222	0.0062112	1.2545	By MS/MS
A0A0R4J293;Q9JLF6	A0A0R4J293;Q9JLF6	3;3	3;3	3;3	Protein-glutamine gamma-glutamyltransferase K	Tgm1	;	2	3	3	3	2	1	1	1	0	3	0	0	0	2	1	1	1	0	3	0	0	0	2	1	1	1	0	3	0	0	0	4	4	4	89.795	815	815;815	0.0065076	1.3994	By MS/MS	By MS/MS	By matching
Q80U29;Q3TAJ6;B1AR52;F7DC70;B1AR51;P58854	Q80U29;Q3TAJ6;B1AR52;F7DC70;B1AR51;P58854	2;1;1;1;1;1	2;1;1;1;1;1	2;1;1;1;1;1	Gamma-tubulin complex component 3	mKIAA0357;Tubgcp3;Dnahc9;Dnah9	;;;;;	6	2	2	2	2	2	1	1	0	2	0	0	0	2	2	1	1	0	2	0	0	0	2	2	1	1	0	2	0	0	0	1	1	1	169.04	1471	1471;905;1957;1958;4484;905	1	-2	By MS/MS	By MS/MS	By matching
Q545V6;P60041	Q545V6;P60041	2;2	2;2	2;2	Somatostatin;Antrin;Somatostatin-28;Somatostatin-14	Sst	;	2	2	2	2	2	0	1	1	0	2	0	0	0	2	0	1	1	0	2	0	0	0	2	0	1	1	0	2	0	0	0	16.4	16.4	16.4	12.745	116	116;116	0	2.4777	By MS/MS		By matching
Q0QEW9;Q642K1;Q58EW0;P35980;G3UZJ6;G3UZK4	Q0QEW9;Q642K1;Q58EW0;P35980;G3UZJ6;G3UZK4	2;2;2;2;1;1	2;2;2;2;1;1	2;2;2;2;1;1	60S ribosomal protein L18	Rpl18	;;;;;	6	2	2	2	2	1	1	1	0	2	0	0	0	2	1	1	1	0	2	0	0	0	2	1	1	1	0	2	0	0	0	14.2	14.2	14.2	19.231	169	169;188;188;188;126;136	0.0045351	1.7891	By MS/MS	By matching	By MS/MS
Q9D8U3;Q9D8Q5	Q9D8U3;Q9D8Q5	2;1	2;1	2;1	Endoplasmic reticulum resident protein 27	Erp27	;	2	2	2	2	2	0	0	1	0	2	0	0	0	2	0	0	1	0	2	0	0	0	2	0	0	1	0	2	0	0	0	12.5	12.5	12.5	30.693	272	272;107	0	3.7551	By matching
D3Z6I8;Q8C7C3;Q58E70;Q3TJ53;E9Q7Q3;D3Z2H9;Q8K0Z5;A0A0R4J1P2;E9Q5J9;P21107-2;P21107;D3YVR0;A2AIM5;S4R2U0;G5E8R0;E9Q453;G5E8R2;G5E8R1;E9Q456;E9Q455;E9Q452;Q9D1R6;Q8BSH3;Q8BP43;Q6PJ18;Q61344;Q564G1;Q545Y3;E9Q450;E9Q448;CON__Q3SX28;B7ZNL3;A2AIM4;E9Q454;Q91VH3;F8WID5;P58774-2;P58774;P58771-2;P58771	D3Z6I8;Q8C7C3;Q58E70;Q3TJ53;E9Q7Q3;D3Z2H9;Q8K0Z5;A0A0R4J1P2;E9Q5J9;P21107-2;P21107;D3YVR0;A2AIM5;S4R2U0;G5E8R0;E9Q453;G5E8R2;G5E8R1;E9Q456;E9Q455;E9Q452;Q9D1R6;Q8BSH3;Q8BP43;Q6PJ18;Q61344;Q564G1;Q545Y3;E9Q450;E9Q448;CON__Q3SX28;B7ZNL3;A2AIM4;E9Q454;Q91VH3;F8WID5;P58774-2;P58774;P58771-2;P58771	2;2;2;2;2;2;2;2;2;2;2;1;1;1;1;1;1;1;1;1;1;1;1;1;1;1;1;1;1;1;1;1;1;1;1;1;1;1;1;1	2;2;2;2;2;2;2;2;2;2;2;1;1;1;1;1;1;1;1;1;1;1;1;1;1;1;1;1;1;1;1;1;1;1;1;1;1;1;1;1	2;2;2;2;2;2;2;2;2;2;2;1;1;1;1;1;1;1;1;1;1;1;1;1;1;1;1;1;1;1;1;1;1;1;1;1;1;1;1;1	Tropomyosin alpha-3 chain;Tropomyosin beta chain;Tropomyosin alpha-1 chain	Tpm3;Tpm3-rs7;Tpm2;Tpm1	;;;;;;;;;;;;;;;;;;;;;;;;;;;;;;;;;;;;;;;	40	2	2	2	2	0	0	1	0	1	0	0	0	2	0	0	1	0	1	0	0	0	2	0	0	1	0	1	0	0	0	7.7	7.7	7.7	28.723	247	247;248;248;248;248;248;284;284;285;248;285;71;106;157;245;245;248;248;248;251;281;284;284;284;284;284;284;284;284;284;284;284;284;287;308;326;284;284;284;284	0	4.7182	By MS/MS
F7A6H4;E9Q555	F7A6H4;E9Q555	2;2	2;2	2;2	E3 ubiquitin-protein ligase RNF213	Rnf213	;	2	2	2	2	2	1	1	1	0	1	0	0	0	2	1	1	1	0	1	0	0	0	2	1	1	1	0	1	0	0	0	0.6	0.6	0.6	584.78	5152	5152;5152	1	-2	By MS/MS	By matching	By matching
Q545J0;Q08731;A0A0N4SVN9	Q545J0;Q08731	4;4;1	4;4;1	4;4;1	Lithostathine-2	Reg2	;	3	4	4	4	2	2	1	0	0	4	0	0	0	2	2	1	0	0	4	0	0	0	2	2	1	0	0	4	0	0	0	26	26	26	19.407	173	173;173;132	0.0066372	1.5151	By MS/MS	By matching	By matching
Q3TWM9;Q3UAS4;Q3UE29;E9PZ00;Q3TXJ0;Q8BFQ1;Q3U8C4;Q3U897;Q3U825;Q3U5W2;Q3TXP9;Q3TWL8;Q3TWF9;Q3TWE9;Q3TKK3;Q3TKB2;Q3TIT5;Q3TID4;K3W4L3;B2RUD7;Q3UFE8;J3QPG5;Q61207	Q3TWM9;Q3UAS4;Q3UE29;E9PZ00;Q3TXJ0;Q8BFQ1;Q3U8C4;Q3U897;Q3U825;Q3U5W2;Q3TXP9;Q3TWL8;Q3TWF9;Q3TWE9;Q3TKK3;Q3TKB2;Q3TIT5;Q3TID4;K3W4L3;B2RUD7;Q3UFE8;J3QPG5;Q61207	2;2;2;2;2;2;2;2;2;2;2;2;2;2;2;2;2;2;2;2;2;2;2	2;2;2;2;2;2;2;2;2;2;2;2;2;2;2;2;2;2;2;2;2;2;2	2;2;2;2;2;2;2;2;2;2;2;2;2;2;2;2;2;2;2;2;2;2;2	Prosaposin	Psap	;;;;;;;;;;;;;;;;;;;;;;	23	2	2	2	2	0	1	0	0	2	0	0	0	2	0	1	0	0	2	0	0	0	2	0	1	0	0	2	0	0	0	3.8	3.8	3.8	58.298	527	527;545;551;551;553;554;554;554;554;554;554;554;554;554;554;554;554;554;556;556;557;557;557	0.0045249	1.704	By MS/MS		By matching
P48678-3;P48678-2;P48678	P48678-3;P48678-2;P48678	3;3;3	3;3;3	3;3;3	Prelamin-A/C;Lamin-A/C	Lmna	;;	3	3	3	3	2	1	0	0	0	3	0	0	0	2	1	0	0	0	3	0	0	0	2	1	0	0	0	3	0	0	0	8.2	8.2	8.2	52.651	462	462;574;665	0.0023753	2.0441	By MS/MS	By matching
Q9D2Q8	Q9D2Q8	2	2	2	Protein S100-A14	S100a14		1	2	2	2	2	0	0	0	0	2	0	0	0	2	0	0	0	0	2	0	0	0	2	0	0	0	0	2	0	0	0	21.2	21.2	21.2	11.599	104	104	0	9.576	By MS/MS
Q3U6E4;Q0VGU2;Q8C2T3;Q3U8X6;Q3UA54;P26350;A0A087WP98;A0A087WPN6;Q8CAQ5;A0A087WQN2;J3QPK6	Q3U6E4;Q0VGU2;Q8C2T3;Q3U8X6;Q3UA54;P26350;A0A087WP98;A0A087WPN6;Q8CAQ5;A0A087WQN2;J3QPK6	2;2;2;2;2;2;1;1;1;1;1	2;2;2;2;2;2;1;1;1;1;1	2;2;2;2;2;2;1;1;1;1;1	Prothymosin alpha;Prothymosin alpha, N-terminally processed;Thymosin alpha	Ptma;Gm12504;Gm6625	;;;;;;;;;;	11	2	2	2	2	0	0	0	0	2	0	0	0	2	0	0	0	0	2	0	0	0	2	0	0	0	0	2	0	0	0	20.7	20.7	20.7	12.325	111	111;111;171;171;172;111;58;98;101;145;166	0	3.5476	By MS/MS
Q542H2;Q3UIT9;Q3TN31;Q9Z2U0;Q3THL2;Q8VEB8;B7ZMS3;Q9CWH6	Q542H2;Q3UIT9;Q3TN31;Q9Z2U0;Q3THL2	3;3;3;3;2;1;1;1	3;3;3;3;2;1;1;1	3;3;3;3;2;1;1;1	Proteasome subunit alpha type;Proteasome subunit alpha type-7	Psma7	;;;;	8	3	3	3	2	0	0	0	0	2	0	0	0	2	0	0	0	0	2	0	0	0	2	0	0	0	0	2	0	0	0	11.3	11.3	11.3	27.855	248	248;248;248;248;178;98;178;250	0.0080808	1.1943	By MS/MS
Q8C1Y3;Q3U4Y0;P10922	Q8C1Y3;Q3U4Y0;P10922	2;2;2	2;2;2	2;2;2	Histone H1.0;Histone H1.0, N-terminally processed	H1f0	;;	3	2	2	2	2	0	0	0	0	2	0	0	0	2	0	0	0	0	2	0	0	0	2	0	0	0	0	2	0	0	0	12.8	12.8	12.8	19.253	179	179;194;194	0	2.4261	By MS/MS
Q3UB63;Q3U995;Q3THU8;G5E902;Q8VEM8	Q3UB63;Q3U995;Q3THU8;G5E902;Q8VEM8	2;2;2;2;2	2;2;2;2;2	2;2;2;2;2	Phosphate carrier protein, mitochondrial	Slc25a3	;;;;	5	2	2	2	2	0	0	0	0	0	0	0	0	2	0	0	0	0	0	0	0	0	2	0	0	0	0	0	0	0	0	5.6	5.6	5.6	39.645	357	357;357;357;358;357	0.0062241	1.2577	By MS/MS
Q80XJ7;Q540D7;Q3UJW9;Q9JII6;B1AXW3	Q80XJ7;Q540D7;Q3UJW9;Q9JII6;B1AXW3	2;2;2;2;1	2;2;2;2;1	2;2;2;2;1	Alcohol dehydrogenase [NADP(+)]	Akr1a1	;;;;	5	2	2	2	2	0	0	0	0	0	0	0	0	2	0	0	0	0	0	0	0	0	2	0	0	0	0	0	0	0	0	8.3	8.3	8.3	36.615	325	325;325;325;325;204	0.0066225	1.5099	By MS/MS
Q3U6K8;Q3TIG8;Q3THL7;Q60932-2;Q60932	Q3U6K8;Q3TIG8;Q3THL7;Q60932-2;Q60932	2;2;2;2;2	2;2;2;2;2	2;2;2;2;2	Voltage-dependent anion-selective channel protein 1	Vdac1	;;;;	5	2	2	2	2	0	0	0	0	0	0	0	0	2	0	0	0	0	0	0	0	0	2	0	0	0	0	0	0	0	0	10.6	10.6	10.6	30.725	283	283;283;283;283;296	0.0023697	2.0146	By MS/MS
Q3TWK8;B2CQD6;Q08879;Q08879-2;Q3TW70	Q3TWK8;B2CQD6;Q08879;Q08879-2	7;7;7;4;2	1;1;1;1;0	1;1;1;1;0	Fibulin-1	Fbln1	;;;	5	7	1	1	3	5	3	4	6	4	6	5	4	0	1	0	0	0	0	0	0	0	0	1	0	0	0	0	0	0	0	11.1	2.4	2.4	78.06	705	705;705;705;685;228	0	48.605	By matching	By MS/MS	By matching
Q792Y6;P07146	Q792Y6;P07146	5;5	3;3	3;3	Anionic trypsin-2	Prss2	;	2	5	3	3	3	5	3	4	2	2	1	1	1	1	3	1	3	1	0	1	0	0	1	3	1	3	1	0	1	0	0	35.8	28.5	28.5	26.203	246	246;246	0	14.287	By MS/MS	By MS/MS	By matching
Q6IMF0;E9Q1Y9;B2RTB6;P97861;Q61726;Q9ERE2	Q6IMF0;E9Q1Y9;B2RTB6;P97861;Q61726;Q9ERE2	15;13;13;12;12;11;11	2;2;2;1;1;2;1	1;1;1;0;0;1;0	Keratin, type II cuticular Hb3;Keratin, type II cuticular Hb6;Keratin, type II cuticular Hb1	Krt83;5430421N21Rik;Krt86;Krt81	;;;;;;	7	15	2	1	3	8	4	2	10	11	1	2	2	0	0	0	0	0	2	0	1	1	0	0	0	0	0	1	0	1	1	28.9	3.6	1.8	54.628	495	495;479;479;486;486;495;481	0	5.4392	By matching	By matching	By matching
Q9JJ20;O70456	Q9JJ20;O70456	3;3	1;1	1;1	14-3-3 protein sigma	Sfn	;	2	3	1	1	3	2	2	2	1	3	1	1	1	1	1	1	0	0	1	0	0	0	1	1	1	0	0	1	0	0	0	10.5	3.2	3.2	27.833	248	248;248	0.008	1.1659	By MS/MS	By matching	By MS/MS
Q9CY10;Q91VB8;Q8BPF4;A8DUV3;P01942;Q9QWJ3;Q9CY06;Q9CWS5;Q61287;A8DUV1;Q61649;Q78PA4;A7M7S6;P06467	Q9CY10;Q91VB8;Q8BPF4;A8DUV3;P01942;Q9QWJ3;Q9CY06;Q9CWS5;Q61287;A8DUV1;Q61649	6;6;6;6;6;5;5;5;5;5;3;1;1;1	4;4;4;4;4;3;3;3;3;3;3;0;0;0	4;4;4;4;4;3;3;3;3;3;3;0;0;0	Hemoglobin subunit alpha	haemaglobin alpha 2;Hbat1;Hba	;;;;;;;;;;	14	6	4	4	3	1	2	2	3	5	2	2	2	2	0	1	1	1	4	0	0	1	2	0	1	1	1	4	0	0	1	43	36.6	36.6	15.202	142	142;142;142;142;142;122;142;142;142;142;58;142;156;142	0	10.476	By MS/MS	By matching	By MS/MS
A6BLY7	A6BLY7	3	1	1	Keratin, type I cytoskeletal 28	Krt28		1	3	1	1	3	2	2	2	2	3	2	2	2	1	1	1	1	1	1	1	1	1	1	1	1	1	1	1	1	1	1	5	1.9	1.9	50.346	462	462	0.0045662	1.8039	By MS/MS	By MS/MS	By MS/MS
Q61782	Q61782	5;5	1;1	1;1			;	2	5	1	1	3	4	3	4	1	5	0	2	1	0	0	0	0	0	1	0	0	0	0	0	0	0	0	1	0	0	0	58.1	10.8	10.8	10.662	93	93;93	1	-2	By matching	By matching	By matching
D3Z6E4;Q922A0;Q545V3;Q3UJ20;P17183;D3YVD3;D3Z2S4;A0A0N4SUX5;A0A0N4SUI6;B1ARR6;A0A0N4SUW8;Q5SX61;Q5SX60;Q5SX59;Q4FK59;P21550	D3Z6E4;Q922A0;Q545V3;Q3UJ20;P17183;D3YVD3;D3Z2S4;A0A0N4SUX5;A0A0N4SUI6;B1ARR6	4;4;4;4;4;3;3;3;2;2;1;1;1;1;1;1	2;2;2;2;2;1;1;1;0;0;0;0;0;0;0;0	2;2;2;2;2;1;1;1;0;0;0;0;0;0;0;0	Enolase;Gamma-enolase	Eno2;Eno1	;;;;;;;;;	16	4	2	2	3	1	0	1	1	3	1	2	2	1	0	0	0	0	1	0	1	1	1	0	0	0	0	1	0	1	1	20.3	10.5	10.5	34.804	315	315;338;434;434;434;122;162;391;58;67;37;70;80;196;434;434	0.0023256	1.9265	By MS/MS	By matching
Q9DCY1;P24369;Q6ZQM2	Q9DCY1;P24369	6;6;2	6;6;2	6;6;2	Peptidyl-prolyl cis-trans isomerase;Peptidyl-prolyl cis-trans isomerase B	Ppib	;	3	6	6	6	3	2	2	0	1	4	0	1	1	3	2	2	0	1	4	0	1	1	3	2	2	0	1	4	0	1	1	25	25	25	23.713	216	216;216;142	0	7.1663	By MS/MS	By matching	By MS/MS
P68040	P68040	4	4	4	Guanine nucleotide-binding protein subunit beta-2-like 1;Guanine nucleotide-binding protein subunit beta-2-like 1, N-terminally processed	Gnb2l1		1	4	4	4	3	0	0	0	0	1	0	0	1	3	0	0	0	0	1	0	0	1	3	0	0	0	0	1	0	0	1	17.7	17.7	17.7	35.076	317	317	0	6.3087	By MS/MS
A8IP69;P61982	A8IP69;P61982	4;4	2;2	2;2	14-3-3 protein gamma;14-3-3 protein gamma, N-terminally processed	Ywhag	;	2	4	2	2	3	1	1	3	1	2	1	1	3	1	0	0	1	0	0	0	0	2	1	0	0	1	0	0	0	0	2	20.6	13.4	13.4	28.302	247	247;247	0	17.536	By MS/MS	By matching	By matching
P05208	P05208	7	7	7	Chymotrypsin-like elastase family member 2A	Cela2a		1	7	7	7	3	4	3	3	5	5	1	2	1	3	4	3	3	5	5	1	2	1	3	4	3	3	5	5	1	2	1	47.2	47.2	47.2	28.913	271	271	0	52.905	By MS/MS	By MS/MS	By MS/MS
Q07797;E9Q5X5	Q07797	4;1	4;1	4;1	Galectin-3-binding protein	Lgals3bp		2	4	4	4	3	0	1	0	0	3	1	2	3	3	0	1	0	0	3	1	2	3	3	0	1	0	0	3	1	2	3	11.6	11.6	11.6	64.49	577	577;204	0	16.067	By MS/MS		By matching
Q99PT1	Q99PT1	4	4	4	Rho GDP-dissociation inhibitor 1	Arhgdia		1	4	4	4	3	1	1	0	1	2	1	1	1	3	1	1	0	1	2	1	1	1	3	1	1	0	1	2	1	1	1	41.2	41.2	41.2	23.407	204	204	0	38.973	By MS/MS	By matching	By MS/MS
Q5M8R8;Q5FWB6;P14869;S4R1N1;E9Q070;D3YVM5;O89073	Q5M8R8;Q5FWB6;P14869;S4R1N1;E9Q070;D3YVM5	5;5;5;4;4;3;1	5;5;5;4;4;3;1	5;5;5;4;4;3;1	60S acidic ribosomal protein P0	Rplp0;Gm8730	;;;;;	7	5	5	5	3	2	1	0	0	1	0	3	5	3	2	1	0	0	1	0	3	5	3	2	1	0	0	1	0	3	5	21.5	21.5	21.5	34.216	317	317;317;317;221;317;145;131	0	9.2286	By MS/MS	By MS/MS	By matching
Q4FZK2;Q9D8N0;Q8R1N8	Q4FZK2;Q9D8N0;Q8R1N8	4;4;3	4;4;3	4;4;3	Elongation factor 1-gamma	Eef1g	;;	3	4	4	4	3	0	1	0	0	3	0	1	2	3	0	1	0	0	3	0	1	2	3	0	1	0	0	3	0	1	2	9.8	9.8	9.8	50.06	437	437;437;317	0	4.3138	By MS/MS		By matching
P99027	P99027	3	3	3	60S acidic ribosomal protein P2	Rplp2		1	3	3	3	3	1	1	0	0	3	0	1	1	3	1	1	0	0	3	0	1	1	3	1	1	0	0	3	0	1	1	50.4	50.4	50.4	11.651	115	115	0	12.284	By MS/MS	By matching	By MS/MS
A2A5N2;Q9CQV8-2;Q9CQV8;A2A5N1	A2A5N2;Q9CQV8-2;Q9CQV8;A2A5N1	4;4;4;2	1;1;1;1	1;1;1;1	14-3-3 protein beta/alpha;14-3-3 protein beta/alpha, N-terminally processed	Ywhab	;;;	4	4	1	1	3	2	2	3	2	3	1	3	3	0	0	0	0	0	0	0	1	1	0	0	0	0	0	0	0	1	1	16.7	5.7	5.7	28.086	246	246;244;246;159	0	23.258	By matching	By matching	By matching
B2RTL6;Q9Z1T2;E9PWF0;Q05895	B2RTL6;Q9Z1T2	5;5;1;1	4;4;1;1	4;4;1;1	Thrombospondin-4	Thbs4	;	4	5	4	4	3	4	4	4	3	1	4	5	5	2	3	3	3	2	0	3	4	4	2	3	3	3	2	0	3	4	4	6.3	5.3	5.3	106.37	963	963;963;919;956	0	35.275	By MS/MS	By MS/MS	By MS/MS
Q91VL4;Q3TP88;Q3TUE2;Q3TX57;Q3TU64;Q01149	Q91VL4;Q3TP88;Q3TUE2;Q3TX57;Q3TU64;Q01149	4;4;4;4;4;4	4;4;4;4;4;4	4;4;4;4;4;4	Collagen alpha-2(I) chain	Col1a2	;;;;;	6	4	4	4	3	3	3	1	2	2	2	1	1	3	3	3	1	2	2	2	1	1	3	3	3	1	2	2	2	1	1	9.5	9.5	9.5	56.662	566	566;959;1241;1372;1372;1372	0	20.89	By MS/MS	By MS/MS	By MS/MS
Q545I7;P01325	Q545I7;P01325	5;5	4;4	4;4	Insulin-1;Insulin-1 B chain;Insulin-1 A chain	Ins1	;	2	5	4	4	3	2	2	3	1	2	2	4	3	2	1	1	2	1	1	2	4	2	2	1	1	2	1	1	2	4	2	70.4	50.9	50.9	12.16	108	108;108	0	41.497	By MS/MS	By MS/MS	By MS/MS
Q3TT51;P12961	Q3TT51;P12961	4;4	4;4	4;4	Neuroendocrine protein 7B2;N-terminal peptide;C-terminal peptide	Scg5	;	2	4	4	4	3	2	1	3	1	4	1	3	3	3	2	1	3	1	4	1	3	3	3	2	1	3	1	4	1	3	3	30.7	30.7	30.7	23.866	212	212;212	0	46.933	By MS/MS	By MS/MS	By MS/MS
A0JLV3;B2RVD5;B2RTK3;Q8CBB6;Q921L4;Q8CGP2;Q8CGP1;Q6ZWY9;Q64525;Q64478;Q64475;P10854;P10853;Q8CGP2-2;A0JNS9;Q9D2U9;Q8CGP0;Q64524;P70696;Q8VEE3;G3X9D5	A0JLV3;B2RVD5;B2RTK3;Q8CBB6;Q921L4;Q8CGP2;Q8CGP1;Q6ZWY9;Q64525;Q64478;Q64475;P10854;P10853;Q8CGP2-2;A0JNS9;Q9D2U9;Q8CGP0;Q64524;P70696;Q8VEE3;G3X9D5	4;4;4;4;4;4;4;4;4;4;4;4;4;4;3;3;3;3;3;2;2	4;4;4;4;4;4;4;4;4;4;4;4;4;4;3;3;3;3;3;2;2	4;4;4;4;4;4;4;4;4;4;4;4;4;4;3;3;3;3;3;2;2	Histone H2B;Histone H2B type 1-P;Histone H2B type 1-K;Histone H2B type 1-C/E/G;Histone H2B type 2-B;Histone H2B type 1-H;Histone H2B type 1-B;Histone H2B type 1-M;Histone H2B type 1-F/J/L;Histone H2B type 3-A;Histone H2B type 3-B;Histone H2B type 2-E;Histone H2B type 1-A	Hist1h2bj;Hist1h2bk;Hist1h2bm;Hist1h2br;LOC665622;Hist1h2bp;Hist1h2bc;Hist2h2bb;Hist1h2bh;Hist1h2bb;Hist1h2bf;Hist1h2ba;Hist3h2ba;Hist3h2bb;Hist2h2be	;;;;;;;;;;;;;;;;;;;;	21	4	4	4	3	3	2	2	2	3	2	4	3	3	3	2	2	2	3	2	4	3	3	3	2	2	2	3	2	4	3	34.1	34.1	34.1	13.579	123	123;126;126;134;135;126;126;126;126;126;126;126;126;138;127;126;126;126;127;120;120	0	10.048	By MS/MS	By MS/MS	By MS/MS
Q5EEX1;P01326;D0EY27;E0CXX7;D3YWU5;D3Z596;D3Z595	Q5EEX1;P01326;D0EY27;E0CXX7	6;6;5;3;2;2;2	6;6;5;3;2;2;2	5;5;5;2;2;2;2	Insulin-2;Insulin-2 B chain;Insulin-2 A chain	Ins2	;;;	7	6	6	5	3	1	1	5	1	4	5	4	5	3	1	1	5	1	4	5	4	5	2	0	0	4	1	3	5	4	4	75.5	75.5	56.4	12.364	110	110;110;109;98;71;79;106	0	248.03	By MS/MS	By MS/MS	By MS/MS
D3YW52;Q61838	D3YW52;Q61838	4;4	3;3	3;3	Alpha-2-macroglobulin;Alpha-2-macroglobulin 165 kDa subunit;Alpha-2-macroglobulin 35 kDa subunit	Pzp;A2m	;	2	4	3	3	3	3	3	3	3	3	3	3	3	2	2	2	2	2	2	2	2	2	2	2	2	2	2	2	2	2	2	2.3	1.8	1.8	167.28	1507	1507;1495	0	6.1637	By MS/MS	By MS/MS	By MS/MS
Q8BPI7;Q5M9P0;Q3U5U5;Q3U4D1;Q3TF14;P50247	Q8BPI7;Q5M9P0;Q3U5U5;Q3U4D1;Q3TF14;P50247	3;3;3;3;3;3	3;3;3;3;3;3	3;3;3;3;3;3	Adenosylhomocysteinase	Ahcy	;;;;;	6	3	3	3	3	1	1	0	1	2	1	1	1	3	1	1	0	1	2	1	1	1	3	1	1	0	1	2	1	1	1	13.9	13.9	13.9	36.04	324	324;432;432;432;432;432	0	8.3352	By MS/MS	By MS/MS	By matching
Q5M9K1;P07309;Q9D6A4	Q5M9K1;P07309;Q9D6A4	4;4;3	4;4;3	4;4;3	Transthyretin	Ttr	;;	3	4	4	4	3	1	2	2	0	3	1	2	3	3	1	2	2	0	3	1	2	3	3	1	2	2	0	3	1	2	3	39.5	39.5	39.5	15.776	147	147;147;147	0	68.216	By MS/MS	By matching	By matching
Q3UDU4;Q564E2;Q3TI99;Q3TCI7;G5E8N5;P06151;D3Z736;D3YZQ9;Q99K20;Q3THB4;Q6NXW3;Q3UIC3	Q3UDU4;Q564E2;Q3TI99;Q3TCI7;G5E8N5;P06151;D3Z736;D3YZQ9;Q99K20;Q3THB4	3;3;3;3;3;3;2;2;2;2;1;1	2;2;2;2;2;2;1;1;1;1;1;1	2;2;2;2;2;2;1;1;1;1;1;1	L-lactate dehydrogenase;L-lactate dehydrogenase A chain	Ldha	;;;;;;;;;	12	3	2	2	3	1	1	0	0	3	1	1	2	2	0	0	0	0	2	1	1	1	2	0	0	0	0	2	1	1	1	9.4	5.8	5.8	36.265	330	330;332;332;332;361;332;237;273;315;332;104;169	0	2.4229	By MS/MS	By matching	By matching
Q544Y7;P18760;F8WGL3;Q9CX22;Q3UHW9;P45591	Q544Y7;P18760;F8WGL3;Q9CX22	4;4;3;3;1;1	4;4;3;3;1;1	4;4;3;3;1;1	Cofilin-1	Cfl1	;;;	6	4	4	4	3	1	1	0	1	3	0	4	4	3	1	1	0	1	3	0	4	4	3	1	1	0	1	3	0	4	4	34.3	34.3	34.3	18.559	166	166;166;227;229;166;166	0	10.165	By MS/MS	By matching	By matching
Q9QXV0	Q9QXV0	6	6	6	ProSAAS;KEP;Big SAAS;Little SAAS;Big PEN-LEN;PEN;PEN-20;PEN-19;Little LEN;Big LEN	Pcsk1n		1	6	6	6	3	1	1	2	0	5	0	3	2	3	1	1	2	0	5	0	3	2	3	1	1	2	0	5	0	3	2	33.3	33.3	33.3	27.27	258	258	0	12.568	By MS/MS	By matching	By MS/MS
A5JUZ1;A0A0A6YW67;E9Q9J0;Q66JP1;Q8C2K3;Q642L7;E9Q4P0;E9Q5F6;Q922B0;E9QNP0;Q5SX22;Q3TH47;Q78XY9;Q6NZC5;Q8R0Z9;Q922Z8;Q8VC46;P62984;P62983;P0CG49;P0CG50;B0LAC2;J3QK04;D3YYZ2	A5JUZ1;A0A0A6YW67;E9Q9J0;Q66JP1;Q8C2K3;Q642L7;E9Q4P0;E9Q5F6;Q922B0;E9QNP0;Q5SX22;Q3TH47;Q78XY9;Q6NZC5;Q8R0Z9;Q922Z8;Q8VC46;P62984;P62983;P0CG49;P0CG50;B0LAC2;J3QK04	3;3;3;3;3;3;3;3;3;3;3;3;3;3;3;3;3;3;3;3;3;2;2;1	3;3;3;3;3;3;3;3;3;3;3;3;3;3;3;3;3;3;3;3;3;2;2;1	3;3;3;3;3;3;3;3;3;3;3;3;3;3;3;3;3;3;3;3;3;2;2;1	Ubiquitin-60S ribosomal protein L40;Ubiquitin;60S ribosomal protein L40;Ubiquitin-40S ribosomal protein S27a;Ubiquitin;40S ribosomal protein S27a;Polyubiquitin-B;Ubiquitin;Polyubiquitin-C;Ubiquitin;Ubiquitin-related 1;Ubiquitin-related 2	Ubc;Gm8797;Uba52;Gm1821;Rps27a;Kxd1;Ubb;Gm7808	;;;;;;;;;;;;;;;;;;;;;;	24	3	3	3	3	3	2	3	0	3	0	1	1	3	3	2	3	0	3	0	1	1	3	3	2	3	0	3	0	1	1	44.7	44.7	44.7	8.5647	76	76;77;96;128;153;156;193;201;202;232;236;278;305;305;354;582;658;128;156;305;734;71;128;122	0	12.128	By MS/MS	By MS/MS	By MS/MS
A0A0N4SUM2;B7ZP22;O88569-3;O88569-2;O88569	A0A0N4SUM2;B7ZP22;O88569-3;O88569-2;O88569	3;3;3;3;3	3;3;3;3;3	3;3;3;3;3	Heterogeneous nuclear ribonucleoproteins A2/B1	Hnrnpa2b1	;;;;	5	3	3	3	3	0	0	0	0	2	0	3	2	3	0	0	0	0	2	0	3	2	3	0	0	0	0	2	0	3	2	22.6	22.6	22.6	16.936	155	155;341;301;341;353	0	7.0467	By MS/MS
Q3UKA4;P00329	Q3UKA4;P00329	4;4	4;4	4;4	Alcohol dehydrogenase 1	Adh1	;	2	4	4	4	3	0	0	0	0	0	0	2	2	3	0	0	0	0	0	0	2	2	3	0	0	0	0	0	0	2	2	20.8	20.8	20.8	39.771	375	375;375	0	41.552	By MS/MS
E0CZ27;A1L0U3;F8WI35;A1L0V4;B9EI85;P84244;P84228;P68433;P02301;E0CYN1;E0CYR7	E0CZ27;A1L0U3;F8WI35;A1L0V4;B9EI85;P84244;P84228;P68433;P02301	3;3;3;3;3;3;3;3;3;1;1	3;3;3;3;3;3;3;3;3;1;1	3;3;3;3;3;3;3;3;3;1;1	Histone H3;Histone H3.3;Histone H3.2;Histone H3.1;Histone H3.3C	H3f3a;Hist1h3e;Hist1h3i;Hist2h3b;Hist1h3b;Hist1h3a;H3f3c	;;;;;;;;	11	3	3	3	3	0	1	1	1	3	1	0	1	3	0	1	1	1	3	1	0	1	3	0	1	1	1	3	1	0	1	19.3	19.3	19.3	13.322	119	119;133;135;135;136;136;136;136;136;52;55	0	2.18	By MS/MS		By MS/MS
Q9D0A2;Q9CZP6;Q5YLW3;Q3UK56;Q3UCL7;P62908;O89068;A0A140LI77;D3YV43	Q9D0A2;Q9CZP6;Q5YLW3;Q3UK56;Q3UCL7;P62908	4;4;4;4;4;4;1;1;1	4;4;4;4;4;4;1;1;1	4;4;4;4;4;4;1;1;1	40S ribosomal protein S3	Rps3	;;;;;	9	4	4	4	3	0	1	0	0	2	0	0	1	3	0	1	0	0	2	0	0	1	3	0	1	0	0	2	0	0	1	21.8	21.8	21.8	26.64	243	243;243;243;243;243;243;123;144;191	0	2.3034	By MS/MS		By matching
E0CXB1;Q9QUM9	E0CXB1;Q9QUM9	3;3	3;3	3;3	Proteasome subunit alpha type-6	Psma6	;	2	3	3	3	3	0	0	0	0	2	0	0	1	3	0	0	0	0	2	0	0	1	3	0	0	0	0	2	0	0	1	17.2	17.2	17.2	25.264	227	227;246	0	5.1747	By MS/MS
Q3TVS6;Q3TC17;P10605;Q6LAF6	Q3TVS6;Q3TC17;P10605	5;5;5;2	5;5;5;2	5;5;5;2	Cathepsin B;Cathepsin B light chain;Cathepsin B heavy chain	Ctsb	;;	4	5	5	5	3	0	0	0	0	4	0	0	2	3	0	0	0	0	4	0	0	2	3	0	0	0	0	4	0	0	2	18.3	18.3	18.3	37.319	339	339;339;339;194	0	10.824	By MS/MS
P15105;D3Z121;D3YVK1;V9GZG5;V9GZP0	P15105;D3Z121;D3YVK1;V9GZG5	3;2;2;2;1	3;2;2;2;1	3;2;2;2;1	Glutamine synthetase	Glul	;;;	5	3	3	3	3	0	0	0	0	0	0	0	1	3	0	0	0	0	0	0	0	1	3	0	0	0	0	0	0	0	1	8.8	8.8	8.8	42.119	373	373;112;199;371;200	0	7.2383	By MS/MS
A0A097PUG1;A0A097PUH2	A0A097PUG1;A0A097PUH2	3;3	3;3	3;3			;	2	3	3	3	3	0	0	0	0	1	0	0	0	3	0	0	0	0	1	0	0	0	3	0	0	0	0	1	0	0	0	6.6	6.6	6.6	51.332	468	468;469	0	6.2638	By MS/MS
P54071	P54071	3	3	2	Isocitrate dehydrogenase [NADP], mitochondrial	Idh2		1	3	3	2	3	0	0	0	0	2	0	0	0	3	0	0	0	0	2	0	0	0	2	0	0	0	0	1	0	0	0	7.3	7.3	5.3	50.906	452	452	0	3.5489	By MS/MS
Q9ER05;Q9D7P8;Q9D960;Q9DC82	Q9ER05;Q9D7P8;Q9D960	7;6;6;3	7;6;6;3	7;6;6;3		Ctrl	;;	4	7	7	7	3	5	2	5	2	3	0	0	0	3	5	2	5	2	3	0	0	0	3	5	2	5	2	3	0	0	0	42.4	42.4	42.4	28.135	264	264;264;264;164	0	26.208	By MS/MS	By MS/MS	By MS/MS
Q8C2K0;Q5BLK0;Q3TIQ2;P35979;Q6DI58	Q8C2K0;Q5BLK0;Q3TIQ2;P35979;Q6DI58	3;3;3;3;2	3;3;3;3;2	3;3;3;3;2	60S ribosomal protein L12	Rpl12	;;;;	5	3	3	3	3	0	1	1	0	3	0	0	0	3	0	1	1	0	3	0	0	0	3	0	1	1	0	3	0	0	0	25	25	25	17.806	164	164;165;165;165;218	0	6.6165	By MS/MS		By matching
F6UFG6;D3YYE1;D3Z7M9;Q64G17;O35381	F6UFG6;D3YYE1;D3Z7M9;Q64G17;O35381	3;3;3;3;3	3;3;3;3;3	3;3;3;3;3	Putative acidic leucine-rich nuclear phosphoprotein 32 family member C;Acidic leucine-rich nuclear phosphoprotein 32 family member A	Anp32a;Anp32c	;;;;	5	3	3	3	3	1	1	1	0	3	0	0	0	3	1	1	1	0	3	0	0	0	3	1	1	1	0	3	0	0	0	15.2	15.2	15.2	15.306	138	138;198;233;123;247	0	2.5859	By MS/MS	By MS/MS	By MS/MS
Q0PD65;P53994;Q8BXY4;Q6PDZ3;Q3TEG7;Q9DB48;Q5U628;Q0PD64;P59279	Q0PD65;P53994;Q8BXY4;Q6PDZ3	3;3;2;2;1;1;1;1;1	3;3;2;2;1;1;1;1;1	3;3;2;2;1;1;1;1;1	Ras-related protein Rab-2A	Rab2a	;;;	9	3	3	3	3	0	0	0	0	0	0	0	0	3	0	0	0	0	0	0	0	0	3	0	0	0	0	0	0	0	0	20.3	20.3	20.3	23.547	212	212;212;168;212;193;216;216;216;216	0	3.9302	By MS/MS
Q8BW75;E9Q3X6	Q8BW75;E9Q3X6	3;2	3;2	3;2	Amine oxidase [flavin-containing] B	Maob	;	2	3	3	3	3	0	0	0	0	0	0	0	0	3	0	0	0	0	0	0	0	0	3	0	0	0	0	0	0	0	0	8.7	8.7	8.7	58.557	520	520;211	0	4.7481	By MS/MS
Q3UE86;A1A4T2;Q8BHN3;Q8BHN3-2;Q8BHN3-3	Q3UE86;A1A4T2;Q8BHN3;Q8BHN3-2	3;3;3;3;1	3;3;3;3;1	3;3;3;3;1	Neutral alpha-glucosidase AB	Ganab	;;;	5	3	3	3	3	0	0	0	0	0	0	0	0	3	0	0	0	0	0	0	0	0	3	0	0	0	0	0	0	0	0	6.4	6.4	6.4	79.356	702	702;966;944;966;692	0.0064795	1.3807	By MS/MS
Q9CQ52;A2A9U8	Q9CQ52	7;1	6;1	6;1	Chymotrypsin-like elastase family member 3B	Cela3b		2	7	6	6	4	4	4	5	3	5	3	1	1	4	4	4	5	2	5	2	1	1	4	4	4	5	2	5	2	1	1	38.7	36.1	36.1	28.904	269	269;283	0	24.005	By MS/MS	By MS/MS	By MS/MS
B9EIU2;V9GZG9;V9GZQ6;V9GZJ5	B9EIU2;V9GZG9;V9GZQ6;V9GZJ5	8;7;7;6	2;1;1;1	1;0;0;0		C4a;Slp	;;;	4	8	2	1	4	4	4	4	7	2	5	7	4	0	0	0	0	2	0	1	2	1	0	0	0	0	1	0	1	1	1	4.2	1.7	0.4	193.73	1735	1735;1716;1735;1735	0.0061475	1.2274	By matching	By matching	By matching
Q9D7Y7;Q9CPN9	Q9D7Y7;Q9CPN9	5;5;1;1;1;1;1;1;1	5;5;1;1;1;1;1;1;1	5;5;1;1;1;1;1;1;1		2210010C04Rik	;	9	5	5	5	4	3	3	3	3	4	0	1	2	4	3	3	3	3	4	0	1	2	4	3	3	3	3	4	0	1	2	34.4	34.4	34.4	26.407	247	247;247;1473;1489;1506;1544;1549;1561;1577	0	19.455	By MS/MS	By MS/MS	By MS/MS
Q8BFZ3	Q8BFZ3	8	1	1	Beta-actin-like protein 2	Actbl2		1	8	1	1	4	4	5	4	7	4	6	5	6	0	1	1	0	0	0	0	0	1	0	1	1	0	0	0	0	0	1	24.5	3.2	3.2	42.004	376	376	1	-2	By matching	By MS/MS	By matching
Q3TLL6;Q4FZL1;Q5F2A7;Q3UXC2;Q3TGK7;Q3TFG3;P60843;Q3TSJ4;Q78WR5;Q3U8I0;Q8BTU6;Q52KC1;P10630;P10630-2;E9Q561	Q3TLL6;Q4FZL1;Q5F2A7;Q3UXC2;Q3TGK7;Q3TFG3;P60843;Q3TSJ4;Q78WR5;Q3U8I0;Q8BTU6;Q52KC1;P10630;P10630-2;E9Q561	4;4;4;4;4;4;4;3;3;3;3;3;3;3;2	4;4;4;4;4;4;4;3;3;3;3;3;3;3;2	4;4;4;4;4;4;4;3;3;3;3;3;3;3;2	Eukaryotic initiation factor 4A-I;Eukaryotic initiation factor 4A-II;Eukaryotic initiation factor 4A-II, N-terminally processed	Eif4a1;Eif4a2	;;;;;;;;;;;;;;	15	4	4	4	4	2	2	1	0	2	0	1	1	4	2	2	1	0	2	0	1	1	4	2	2	1	0	2	0	1	1	14.3	14.3	14.3	41.49	364	364;405;406;406;406;406;406;225;236;286;362;407;407;408;312	0	9.3588	By MS/MS	By matching	By matching
Q5SX49;Q8CEH8;Q5SX50;P62962;Q3U7V7;J3QMC2	Q5SX49;Q8CEH8;Q5SX50;P62962;Q3U7V7	5;5;5;5;4;2	2;2;2;2;2;1	2;2;2;2;2;1	Profilin;Profilin-1	Pfn1	;;;;	6	5	2	2	4	4	4	4	4	4	3	5	4	1	1	1	1	1	1	0	2	1	1	1	1	1	1	1	0	2	1	72.3	36.6	36.6	11.82	112	112;140;140;140;140;55	0	7.3583	By MS/MS	By MS/MS	By matching
Q53ZU7;O08709;Q6GT24;D3Z0Y2;Q6A0D0;Q8BPD3;Q8BG37;A0A0A6YXQ7	Q53ZU7;O08709;Q6GT24;D3Z0Y2;Q6A0D0;Q8BPD3	8;8;7;6;6;5;2;1	8;8;7;6;6;5;2;1	8;8;7;6;6;5;2;1	Peroxiredoxin-6	Prdx6	;;;;;	8	8	8	8	4	2	2	3	1	4	1	4	3	4	2	2	3	1	4	1	4	3	4	2	2	3	1	4	1	4	3	47.3	47.3	47.3	24.87	224	224;224;224;200;227;178;224;76	0	37.972	By MS/MS	By matching	By MS/MS
Q99LL6;P11087-2;P11087;Q60785	Q99LL6;P11087-2;P11087;Q60785	6;6;6;4;1	6;6;6;4;1	6;6;6;4;1	Collagen alpha-1(I) chain	Col1a1	;;;	5	6	6	6	4	4	4	2	2	1	3	4	4	4	4	4	2	2	1	3	4	4	4	4	4	2	2	1	3	4	4	11.2	11.2	11.2	58.804	589	589;1225;1453;325;114	0	61.299	By MS/MS	By MS/MS	By MS/MS
Q3U7Z6;Q9DBJ1;Q6NWV5;Q5NCI4;O70250	Q3U7Z6;Q9DBJ1;Q6NWV5	7;7;6;3;3	7;7;6;3;3	7;7;6;3;3	Phosphoglycerate mutase 1	Pgam1	;;	5	7	7	7	4	1	0	2	3	2	2	4	4	4	1	0	2	3	2	2	4	4	4	1	0	2	3	2	2	4	4	39.4	39.4	39.4	28.832	254	254;254;197;253;253	0	19.604	By MS/MS	By MS/MS
P55095;A2AS86	P55095;A2AS86	7;6	7;6	7;6	Glucagon;Glicentin;Glicentin-related polypeptide;Oxyntomodulin;Glucagon;Glucagon-like peptide 1;Glucagon-like peptide 1(7-37);Glucagon-like peptide 1(7-36);Glucagon-like peptide 2	Gcg	;	2	7	7	7	4	3	2	5	0	5	3	5	6	4	3	2	5	0	5	3	5	6	4	3	2	5	0	5	3	5	6	47.2	47.2	47.2	20.906	180	180;173	0	267.68	By MS/MS	By MS/MS	By MS/MS
Q5SUV8;O88533;Q5SUV9;Q3TUH2;O35958	Q5SUV8;O88533;Q5SUV9	6;6;4;2;1	6;6;4;2;1	6;6;4;2;1	Aromatic-L-amino-acid decarboxylase	Ddc	;;	5	6	6	6	4	0	0	0	0	3	0	4	2	4	0	0	0	0	3	0	4	2	4	0	0	0	0	3	0	4	2	19	19	19	53.873	480	480;480;253;131;142	0	25.197	By MS/MS
A0A0R4J0Z1;P08003	A0A0R4J0Z1;P08003	7;7	7;7	7;7	Protein disulfide-isomerase A4	Pdia4	;	2	7	7	7	4	0	1	0	0	3	0	5	4	4	0	1	0	0	3	0	5	4	4	0	1	0	0	3	0	5	4	15.4	15.4	15.4	72.369	641	641;638	0	14.157	By MS/MS		By matching
A2A813;Q99LX0;A2A815;D3K2X3;A2A817;A2A816	A2A813;Q99LX0;A2A815;D3K2X3;A2A817;A2A816	6;6;5;3;3;3	6;6;5;3;3;3	6;6;5;3;3;3	Protein deglycase DJ-1	Park7;Dj1	;;;;;	6	6	6	6	4	0	0	0	0	3	0	2	3	4	0	0	0	0	3	0	2	3	4	0	0	0	0	3	0	2	3	45.1	45.1	45.1	18.474	175	175;189;136;73;84;125	0	22.059	By MS/MS
Q5RKP0;Q499X4;Q3TXD3;Q62465;Q3U331	Q5RKP0;Q499X4;Q3TXD3;Q62465;Q3U331	4;4;4;4;3	4;4;4;4;3	4;4;4;4;3	Synaptic vesicle membrane protein VAT-1 homolog	Vat1	;;;;	5	4	4	4	4	0	0	1	0	1	0	0	1	4	0	0	1	0	1	0	0	1	4	0	0	1	0	1	0	0	1	15	15	15	42.521	401	401;406;406;406;406	0	8.9319	By MS/MS
Q4FK36;Q9R0P5	Q4FK36;Q9R0P5	4;4	4;4	4;4	Destrin	Dstn	;	2	4	4	4	4	0	0	1	0	3	0	0	2	4	0	0	1	0	3	0	0	2	4	0	0	1	0	3	0	0	2	29.1	29.1	29.1	18.521	165	165;165	0	5.419	By MS/MS
P08249;A0A0G2JF23;A0A0G2JGY4	P08249;A0A0G2JF23	7;4;3	7;4;3	7;4;3	Malate dehydrogenase, mitochondrial	Mdh2	;	3	7	7	7	4	0	1	1	0	5	0	0	1	4	0	1	1	0	5	0	0	1	4	0	1	1	0	5	0	0	1	26.6	26.6	26.6	35.611	338	338;199;153	0	8.6533	By MS/MS		By matching
B9EHN0;Q02053	B9EHN0;Q02053	5;5	5;5	5;5	Ubiquitin-like modifier-activating enzyme 1	Uba1	;	2	5	5	5	4	0	0	0	0	0	0	0	2	4	0	0	0	0	0	0	0	2	4	0	0	0	0	0	0	0	2	7	7	7	117.81	1058	1058;1058	0	7.6117	By MS/MS
Q4KL76;Q64433;Q9JI95	Q4KL76;Q64433;Q9JI95	4;4;3	4;4;3	4;4;3	10 kDa heat shock protein, mitochondrial	Hspe1;Cpn10-rs1	;;	3	4	4	4	4	0	0	0	0	3	0	1	0	4	0	0	0	0	3	0	1	0	4	0	0	0	0	3	0	1	0	40.2	40.2	40.2	10.963	102	102;102;102	0	7.0262	By MS/MS
Q5SUC3;Q3TXE5;P35564	Q5SUC3;Q3TXE5;P35564	4;4;4	4;4;4	4;4;4	Calnexin	Canx	;;	3	4	4	4	4	0	0	0	0	2	0	0	0	4	0	0	0	0	2	0	0	0	4	0	0	0	0	2	0	0	0	9.3	9.3	9.3	67.277	591	591;591;591	0	5.0712	By MS/MS
P63038;D3Z7J9;D3Z2F2;P63038-2	P63038	4;1;1;1	4;1;1;1	4;1;1;1	60 kDa heat shock protein, mitochondrial	Hspd1		4	4	4	4	4	0	0	0	0	3	0	0	0	4	0	0	0	0	3	0	0	0	4	0	0	0	0	3	0	0	0	12.7	12.7	12.7	60.955	573	573;142;202;258	0	9.3663	By MS/MS
O54994;J3KMM5;Q5DTI2;O55143-2;O55143;Q8R429	O54994;J3KMM5;Q5DTI2;O55143-2;O55143;Q8R429	4;4;4;4;4;2	4;4;4;4;4;2	2;2;2;2;2;1	Calcium-transporting ATPase;Sarcoplasmic/endoplasmic reticulum calcium ATPase 2;Sarcoplasmic/endoplasmic reticulum calcium ATPase 1	Atp2a2;Atp2a1	;;;;;	6	4	4	2	4	0	0	0	0	2	0	0	0	4	0	0	0	0	2	0	0	0	2	0	0	0	0	0	0	0	0	12.5	12.5	6	55.16	502	502;1044;1061;998;1044;994	0	8.6491	By MS/MS
A0A097PUD0;A0A097PUG4	A0A097PUD0;A0A097PUG4	4;4	4;4	4;4			;	2	4	4	4	4	1	1	1	0	4	0	0	0	4	1	1	1	0	4	0	0	0	4	1	1	1	0	4	0	0	0	29.4	29.4	29.4	25.616	235	235;238	0	58.592	By MS/MS	By matching	By matching
B2RQH0;Q61495;Q7TSF1;Q7TSF0;Q9CUH7;Q7TSF0-2	B2RQH0;Q61495;Q7TSF1;Q7TSF0;Q9CUH7	4;4;4;3;2;1	4;4;4;3;2;1	4;4;4;3;2;1	Desmoglein-1-alpha;Desmoglein-1-beta;Desmoglein-1-gamma	Dsg1b;Dsg1a;Dsg1c	;;;;	6	4	4	4	4	3	1	0	0	3	0	0	0	4	3	1	0	0	3	0	0	0	4	3	1	0	0	3	0	0	0	3.7	3.7	3.7	114.45	1060	1060;1057;1060;911;353;427	0	4.6122	By MS/MS	By MS/MS	By MS/MS
Q8VDD5;Q3UFT0;Q99JJ3;Q811J9;E9QPE7;Q8R384;Q69ZX3;O08638-2;O08638;O89055;Q7TQJ6	Q8VDD5;Q3UFT0	5;4;2;2;2;2;2;2;2;1;1	5;4;2;2;2;2;2;2;2;1;1	5;4;2;2;2;2;2;2;2;1;1	Myosin-9	Myh9	;	11	5	5	5	4	0	0	0	0	3	0	0	0	4	0	0	0	0	3	0	0	0	4	0	0	0	0	3	0	0	0	3.3	3.3	3.3	226.37	1960	1960;959;529;575;1938;1972;1984;1938;1972;157;378	0	3.0189	By MS/MS
Q54AH9;Q549D9;A8DV59;A8DV41;P02089;Q9QUN8;D0U293	Q54AH9;Q549D9;A8DV59;A8DV41;P02089;Q9QUN8;D0U293	7;7;7;7;7;6;6	3;3;3;3;3;2;2	3;3;3;3;3;2;2	Hemoglobin subunit beta-2	Hbb-b2;Hbbt2	;;;;;;	7	7	3	3	5	2	2	2	2	7	2	3	2	1	0	0	0	0	3	0	0	0	1	0	0	0	0	3	0	0	0	58.9	28.8	28.8	15.747	146	146;147;147;147;147;146;147	0	2.4712	By MS/MS	By matching	By matching
Q9R0T7;Q9QUK9;Q3V2E0;G3UXD0;Q7M754;Q792Y9;Q9Z1R9	Q9R0T7;Q9QUK9;Q3V2E0;G3UXD0;Q7M754	8;6;6;4;4;2;2	8;6;6;4;4;2;2	3;3;3;2;1;0;0		Try4;Try5;Gm5409	;;;;	7	8	8	3	5	6	5	5	4	6	1	2	4	5	6	5	5	4	6	1	2	4	1	2	1	2	1	2	1	1	2	57.3	57.3	26.4	26.274	246	246;246;255;135;246;245;246	0	87.283	By MS/MS	By MS/MS	By MS/MS
Q5BKQ4	Q5BKQ4	9	9	9	Inactive pancreatic lipase-related protein 1	Pnliprp1		1	9	9	9	5	6	3	5	2	7	1	1	3	5	6	3	5	2	7	1	1	3	5	6	3	5	2	7	1	1	3	25.8	25.8	25.8	52.695	473	473	0	19.749	By MS/MS	By MS/MS	By MS/MS
Q5EBQ2;Q3TGC5;P70296;D3Z1V4;D6RHS6	Q5EBQ2;Q3TGC5;P70296;D3Z1V4;D6RHS6	6;6;6;5;3	6;6;6;5;3	6;6;6;5;3	Phosphatidylethanolamine-binding protein 1;Hippocampal cholinergic neurostimulating peptide	Pebp1	;;;;	5	6	6	6	5	1	1	2	0	4	1	5	5	5	1	1	2	0	4	1	5	5	5	1	1	2	0	4	1	5	5	57.8	57.8	57.8	20.83	187	187;187;187;209;136	0	34.229	By MS/MS	By MS/MS	By MS/MS
Q8VI54;Q9R0G6;A1A557;A2VCQ0	Q8VI54;Q9R0G6;A1A557;A2VCQ0	10;10;9;9	3;3;2;2	3;3;2;2	Cartilage oligomeric matrix protein	Comp	;;;	4	10	3	3	5	8	8	7	5	5	6	7	7	2	2	2	2	1	2	1	2	2	2	2	2	2	1	2	1	2	2	16.8	5	5	82.175	755	755;755;755;759	0	42.101	By MS/MS	By MS/MS	By MS/MS
Q5SVY2;Q3UAJ1;Q3TE63;P17742;Q9CZK9;F8VPN3;V9GXC1;V9GX31	Q5SVY2;Q3UAJ1;Q3TE63;P17742;Q9CZK9	9;9;9;9;7;3;2;2	9;9;9;9;7;3;2;2	9;9;9;9;7;3;2;2	Peptidyl-prolyl cis-trans isomerase;Peptidyl-prolyl cis-trans isomerase A;Peptidyl-prolyl cis-trans isomerase A, N-terminally processed	Ppia	;;;;	8	9	9	9	5	4	4	5	5	6	4	8	6	5	4	4	5	5	6	4	8	6	5	4	4	5	5	6	4	8	6	61	61	61	17.971	164	164;164;164;164;167;147;77;77	0	47.499	By MS/MS	By MS/MS	By MS/MS
Q792Z1	Q792Z1	6	2	2		Try10		1	6	2	2	5	4	4	5	3	5	1	2	3	2	1	1	2	1	2	1	2	2	2	1	1	2	1	2	1	2	2	42.3	15.4	15.4	26.221	246	246	0	10.054	By MS/MS	By MS/MS	By MS/MS
Q3UZV3;Q547J8;Q3TYM6;Q3TT48;P21661	Q3UZV3;Q547J8;Q3TYM6;Q3TT48;P21661	9;9;9;9;9	9;9;9;9;9	9;9;9;9;9	Neuroendocrine convertase 2	Pcsk2	;;;;	5	9	9	9	5	3	3	5	0	5	4	8	6	5	3	3	5	0	5	4	8	6	5	3	3	5	0	5	4	8	6	22.6	22.6	22.6	68.911	619	619;637;637;736;637	0	97.286	By MS/MS	By MS/MS	By MS/MS
Q01853;Q8BNF8	Q01853;Q8BNF8	11;9	11;9	11;9	Transitional endoplasmic reticulum ATPase	Vcp	;	2	11	11	11	5	0	1	0	0	2	0	4	5	5	0	1	0	0	2	0	4	5	5	0	1	0	0	2	0	4	5	25.3	25.3	25.3	89.321	806	806;723	0	27.817	By MS/MS		By matching
B2RTM0;P62806;Q61667;Q6B822	B2RTM0;P62806;Q61667	6;6;4;2	6;6;4;2	6;6;4;2	Histone H4	Hist2h4;Hist1h4a	;;	4	6	6	6	5	3	3	4	2	5	0	4	4	5	3	3	4	2	5	0	4	4	5	3	3	4	2	5	0	4	4	57.3	57.3	57.3	11.367	103	103;103;55;43	0	15.108	By MS/MS	By MS/MS	By MS/MS
P62204;Q3UKW2;Q9D6P8;G3UX57	P62204;Q3UKW2;Q9D6P8	7;6;4;1	7;6;4;1	7;6;4;1	Calmodulin;Calmodulin-like protein 3	Calm1;Calml3	;;	4	7	7	7	5	2	3	1	0	3	0	4	6	5	2	3	1	0	3	0	4	6	5	2	3	1	0	3	0	4	6	50.3	50.3	50.3	16.837	149	149;197;149;39	0	53.836	By MS/MS	By MS/MS	By MS/MS
P08228;Q8C355	P08228	6;1	6;1	6;1	Superoxide dismutase [Cu-Zn]	Sod1		2	6	6	6	5	0	1	0	0	5	0	1	2	5	0	1	0	0	5	0	1	2	5	0	1	0	0	5	0	1	2	43.5	43.5	43.5	15.942	154	154;128	0	15.344	By MS/MS		By matching
Q545A2;P51881;Q8BVI9;P48962;B2RTC8;Q3V132	Q545A2;P51881;Q8BVI9;P48962	5;5;4;4;2;2	5;5;4;4;2;2	5;5;4;4;2;2	ADP/ATP translocase 2;ADP/ATP translocase 2, N-terminally processed;ADP/ATP translocase 1	Slc25a5;Slc25a4	;;;	6	5	5	5	5	0	0	0	0	3	0	0	0	5	0	0	0	0	3	0	0	0	5	0	0	0	0	3	0	0	0	14.8	14.8	14.8	32.931	298	298;298;298;298;320;320	0	2.3877	By MS/MS
Q8C6F9;Q3TV26;P43137	Q8C6F9;Q3TV26;P43137	5;5;5	5;5;5	5;5;5	Lithostathine-1	Reg1	;;	3	5	5	5	5	1	3	2	1	5	0	0	0	5	1	3	2	1	5	0	0	0	5	1	3	2	1	5	0	0	0	45.2	45.2	45.2	14.34	126	126;165;165	0	32.842	By MS/MS	By MS/MS	By MS/MS
A0A0B6VSQ6;P15947;A0A0U1RPN5;Q7M0B4;P15945	A0A0B6VSQ6;P15947;A0A0U1RPN5	5;5;4;2;2	5;5;4;2;2	5;5;4;2;2	Kallikrein-1	Klk1	;;	5	5	5	5	5	1	3	1	0	5	0	0	0	5	1	3	1	0	5	0	0	0	5	1	3	1	0	5	0	0	0	29.1	29.1	29.1	28.774	261	261;261;151;94;261	0	5.2884	By MS/MS	By MS/MS	By matching
P05202	P05202	5	5	5	Aspartate aminotransferase, mitochondrial	Got2		1	5	5	5	5	0	1	0	0	4	0	0	0	5	0	1	0	0	4	0	0	0	5	0	1	0	0	4	0	0	0	16	16	16	47.411	430	430	0	14.884	By MS/MS		By matching
Q8BIS2;Q148Q7;E9Q1Z0	Q8BIS2;Q148Q7;E9Q1Z0	10;10;10;5	1;1;1;1	0;0;0;0		4732456N10Rik	;;;	4	10	1	0	6	6	7	6	3	9	3	5	5	0	0	0	0	0	1	0	0	0	0	0	0	0	0	0	0	0	0	12.8	2	0	58.266	538	538;538;538;511	0	2.1728	By matching	By matching	By matching
A3KML3;F6YY69;F6VW30;P68254-2;P68254	A3KML3;F6YY69;F6VW30;P68254-2;P68254	7;7;7;7;7	4;4;4;4;4	4;4;4;4;4	14-3-3 protein theta	Ywhaq	;;;;	5	7	4	4	6	2	2	3	3	3	1	3	5	3	0	0	0	1	0	0	1	3	3	0	0	0	1	0	0	1	3	36.3	25.3	25.3	27.778	245	245;285;303;243;245	0	55.688	By MS/MS	By matching	By matching
Q5NC82;E9PZF0;Q01768;B0LAA8;Q8R4B4;Q5NC80;Q5NC79	Q5NC82;E9PZF0;Q01768;B0LAA8;Q8R4B4	9;9;9;8;6;4;2	9;9;9;8;6;4;2	5;5;5;4;2;0;0	Nucleoside diphosphate kinase;Nucleoside diphosphate kinase B	Nme2;Gm20390	;;;;	7	9	9	5	6	2	2	2	2	5	1	6	5	6	2	2	2	2	5	1	6	5	2	0	0	1	1	1	0	3	2	74.3	74.3	44.1	17.363	152	152;267;152;144;365;127;117	0	35.129	By MS/MS	By MS/MS	By MS/MS
Q3THH1;Q922R8;Q3TML0;Q3TJL8;Q9DAB4	Q3THH1;Q922R8;Q3TML0;Q3TJL8;Q9DAB4	7;7;6;6;5	7;7;6;6;5	7;7;6;6;5	Protein disulfide-isomerase A6	Pdia6	;;;;	5	7	7	7	6	2	3	2	1	6	1	6	6	6	2	3	2	1	6	1	6	6	6	2	3	2	1	6	1	6	6	22.2	22.2	22.2	48.657	445	445;440;445;445;391	0	58.138	By MS/MS	By matching	By MS/MS
P50396;D6RI86;B7FAU8	P50396	9;3;2	9;3;2	5;1;1	Rab GDP dissociation inhibitor alpha	Gdi1		3	9	9	5	6	0	0	1	1	5	1	6	2	6	0	0	1	1	5	1	6	2	3	0	0	1	1	3	1	3	1	32.2	32.2	19.5	50.521	447	447;78;149	0	107.35	By MS/MS
Q9CR35	Q9CR35	10	10	10	Chymotrypsinogen B;Chymotrypsin B chain A;Chymotrypsin B chain B;Chymotrypsin B chain C	Ctrb1		1	10	10	10	6	8	6	8	8	8	6	3	6	6	8	6	8	8	8	6	3	6	6	8	6	8	8	8	6	3	6	68.1	68.1	68.1	27.822	263	263	0	181.68	By MS/MS	By MS/MS	By MS/MS
Q91X79	Q91X79	8	8	7	Chymotrypsin-like elastase family member 1	Cela1		1	8	8	7	6	5	5	6	8	6	3	2	4	6	5	5	6	8	6	3	2	4	6	5	5	6	7	6	2	2	4	50	50	47.4	28.9	266	266	0	140.18	By MS/MS	By MS/MS	By MS/MS
P35700;B1AXW5;B1AXW6;Q3U9J9;B1AXW4	P35700;B1AXW5;B1AXW6;Q3U9J9	7;6;6;6;3	7;6;6;6;3	6;5;5;5;3	Peroxiredoxin-1	Prdx1	;;;	5	7	7	6	6	1	3	1	0	4	0	3	4	6	1	3	1	0	4	0	3	4	5	1	2	0	0	3	0	3	3	41.2	41.2	37.2	22.176	199	199;170;176;199;123	0	11.904	By MS/MS	By MS/MS	By matching
Q5SXR6;Q68FD5;Q80U89;Q3UPJ3;Q3TAN1;Q8K2I5;Q3TYQ2;Q3U0H2;F6Z1R4;Q3TJ98	Q5SXR6;Q68FD5;Q80U89;Q3UPJ3	8;8;7;5;3;3;3;3;1;1	8;8;7;5;3;3;3;3;1;1	8;8;7;5;3;3;3;3;1;1	Clathrin heavy chain;Clathrin heavy chain 1	Cltc;mKIAA0034	;;;	10	8	8	8	6	0	0	0	0	1	0	0	2	6	0	0	0	0	1	0	0	2	6	0	0	0	0	1	0	0	2	6.4	6.4	6.4	191.98	1679	1679;1675;1684;983;388;504;505;521;216;306	0	10.037	By MS/MS
A8DUK0;P02088;A8DUL5;A8DUP5;A8DUP7;A8DUM2;A8DUP3;A8DUK2;B1Q450;A8DUK7;A8DUK4;E9Q223;A8DUP0;A8DUL2;A8DUL0;A8DUQ5;Q61650;A8DUL7;Q61348	A8DUK0;P02088;A8DUL5;A8DUP5;A8DUP7;A8DUM2;A8DUP3;A8DUK2;B1Q450;A8DUK7;A8DUK4;E9Q223;A8DUP0;A8DUL2;A8DUL0;A8DUQ5	8;8;7;7;7;7;6;6;5;5;5;4;4;4;4;4;3;3;2	6;6;5;5;5;5;5;4;3;3;3;3;3;2;2;2;2;1;2	2;2;1;2;2;2;2;0;1;0;0;0;0;0;0;0;2;0;2	Hemoglobin subunit beta-1	Hbbt1;Hbb-b1;HBB1;Hbb-bs	;;;;;;;;;;;;;;;	19	8	6	2	7	3	3	3	2	7	2	5	2	5	1	1	1	0	5	0	3	0	1	0	0	0	0	2	0	1	0	68.7	55.8	15	15.84	147	147;147;147;147;147;147;147;151;147;147;147;103;147;147;147;147;52;147;31	0	15.082	By MS/MS	By matching	By matching
B2RSN3;Q9CWF2;Q7TMM9;Q99J49;G3UZR1;Q62363;D5MR34	B2RSN3;Q9CWF2;Q7TMM9;Q99J49	11;11;11;8;2;1;1	1;1;1;1;0;0;0	1;1;1;1;0;0;0	Tubulin beta-2B chain;Tubulin beta-2A chain	Tubb2b;Tubb2a	;;;	7	11	1	1	7	2	3	1	4	4	2	8	8	1	0	1	0	0	0	0	0	1	1	0	1	0	0	0	0	0	1	36.9	3.4	3.4	49.953	445	445;445;445;298;67;100;133	0	3.9446	By MS/MS	By matching	By matching
Q3UUX9;Q3TIY6;Q3UC72;Q3UPA3;Q61598-2;Q61598;Q9CZ18	Q3UUX9;Q3TIY6;Q3UC72;Q3UPA3;Q61598-2;Q61598	9;9;9;9;9;9;3	5;5;5;5;5;5;1	5;5;5;5;5;5;1	Rab GDP dissociation inhibitor beta	Gdi2	;;;;;	7	9	5	5	7	2	2	1	0	5	0	5	2	4	2	2	1	0	3	0	2	1	4	2	2	1	0	3	0	2	1	25.4	12.6	12.6	50.507	445	445;445;509;512;409;445;230	0	9.5911	By MS/MS	By matching	By MS/MS
P99024;Q80ZV2	P99024	13;5	4;1	3;1	Tubulin beta-5 chain	Tubb5		2	13	4	3	7	2	2	1	5	5	4	9	9	2	0	0	0	1	2	2	2	3	1	0	0	0	1	1	2	1	2	45.7	15.5	12.2	49.67	444	444;186	0	4.6421	By MS/MS	By matching	By matching
E9Q704;F8VQA4;P97467;Q8BQ31;Q3V1A8;F6TGI4;F6T0D3;F7D4K4;A1L331	E9Q704;F8VQA4;P97467;Q8BQ31;Q3V1A8	13;13;13;7;7;2;1;1;1	13;13;13;7;7;2;1;1;1	13;13;13;7;7;2;1;1;1	Peptidyl-glycine alpha-amidating monooxygenase;Peptidylglycine alpha-hydroxylating monooxygenase;Peptidyl-alpha-hydroxyglycine alpha-amidating lyase	Pam	;;;;	9	13	13	13	7	2	0	8	0	11	1	3	1	7	2	0	8	0	11	1	3	1	7	2	0	8	0	11	1	3	1	17.9	17.9	17.9	97.175	873	873;978;979;367;519;150;169;189;215	0	25.726	By MS/MS	By matching
Q1A602;Q3ULT2;Q3UDJ7;P57780;A1BN54;Q7TPR4;E9Q2W9;Q8BP35;D3Z0L8;O88990;D3Z761;Q99LJ3;Q8K3Q4;Q5FW75;Q9JI91;Q61063;Q61064	Q1A602;Q3ULT2;Q3UDJ7;P57780;A1BN54;Q7TPR4;E9Q2W9	10;10;10;10;7;7;6;3;3;3;2;2;2;2;2;1;1	10;10;10;10;7;7;6;3;3;3;2;2;2;2;2;1;1	10;10;10;10;7;7;6;3;3;3;2;2;2;2;2;1;1	Alpha-actinin-4;Alpha-actinin-1	Actn4;Actn1	;;;;;;	17	10	10	10	7	0	1	1	2	7	3	3	1	7	0	1	1	2	7	3	3	1	7	0	1	1	2	7	3	3	1	13.5	13.5	13.5	104.91	911	911;912;912;912;887;892;518;202;206;900;133;400;894;894;894;72;109	0	23.688	By MS/MS		By matching
P17751;H7BXC3	P17751;H7BXC3	9;8	9;8	9;8	Triosephosphate isomerase	Tpi1	;	2	9	9	9	7	2	4	2	3	7	2	5	4	7	2	4	2	3	7	2	5	4	7	2	4	2	3	7	2	5	4	36.8	36.8	36.8	32.191	299	299;167	0	26.035	By MS/MS	By MS/MS	By MS/MS
Q3UV17	Q3UV17	9;4	1;0	1;0	Keratin, type II cytoskeletal 2 oral	Krt76		2	9	1	1	7	6	6	7	4	9	5	4	4	1	1	1	1	1	1	1	1	1	1	1	1	1	1	1	1	1	1	11.4	1.5	1.5	62.844	594	594;529	0	2.2063	By MS/MS	By MS/MS	By MS/MS
Q04447	Q04447	10	10	10	Creatine kinase B-type	Ckb		1	10	10	10	7	0	1	2	0	4	0	6	7	7	0	1	2	0	4	0	6	7	7	0	1	2	0	4	0	6	7	43.6	43.6	43.6	42.713	381	381	0	51.851	By MS/MS		By matching
Q14DR9;Q8R2E9	Q14DR9;Q8R2E9	10;10	10;10	9;9	ERO1-like protein beta	Ero1lb	;	2	10	10	9	7	0	2	4	0	9	0	4	2	7	0	2	4	0	9	0	4	2	6	0	2	4	0	8	0	4	2	25.7	25.7	23.3	53.518	467	467;467	0	25.403	By MS/MS		By MS/MS
D3Z6F5;Q03265;Q3U452;D6RJ16	D3Z6F5;Q03265	7;7;3;1	7;7;3;1	7;7;3;1	ATP synthase subunit alpha;ATP synthase subunit alpha, mitochondrial	Atp5a1	;	4	7	7	7	7	0	1	0	0	3	0	0	0	7	0	1	0	0	3	0	0	0	7	0	1	0	0	3	0	0	0	15.7	15.7	15.7	54.594	503	503;553;509;89	0	16.618	By MS/MS		By matching
Q6P8U6;Q9D950;Q4VBW7;P17892	Q6P8U6	14;6;1;1	14;6;1;1	14;6;1;1	Pancreatic triacylglycerol lipase	Pnlip		4	14	14	14	8	4	6	7	4	11	2	2	1	8	4	6	7	4	11	2	2	1	8	4	6	7	4	11	2	2	1	39.8	39.8	39.8	51.427	465	465;163;482;482	0	39.138	By MS/MS	By MS/MS	By MS/MS
Q543J5;P32261	Q543J5;P32261	10;10	1;1	1;1	Antithrombin-III	Serpinc1	;	2	10	1	1	8	8	8	7	9	6	9	8	7	1	1	1	1	1	0	0	1	1	1	1	1	1	1	0	0	1	1	20	4.9	4.9	52.003	465	465;465	0	6.4548	By MS/MS	By MS/MS	By MS/MS
P68372;Q9D6F9;Q9CVR0;Q9DCR1;Q9CRT0;Q3U9U3;Q3UMM1;Q922F4;Q9CUN8	P68372;Q9D6F9;Q9CVR0;Q9DCR1	13;10;9;8;6;6;6;6;5	13;10;9;8;6;6;6;6;5	3;2;2;0;0;0;0;0;0	Tubulin beta-4B chain;Tubulin beta-4A chain	Tubb4b;Tubb4a	;;;	9	13	13	3	8	3	4	2	4	6	2	9	9	8	3	4	2	4	6	2	9	9	2	1	1	1	0	2	0	1	2	45.6	45.6	12.1	49.83	445	445;444;291;299;235;375;447;447;211	0	107.26	By MS/MS	By matching	By MS/MS
S4R257;D2KHZ9;A0A0A0MQF6;P16858;S4R1W1;Q3TUZ9;D3YYI5;W8QM43;Q6IWE3;Q4VBD1;Q8CEV2;Q3V2I5;A0A0R4J0X7;S4R2G5;Q64467;S4R1W8;V9GXA7;V9GXK0;V9GX06;Q8BJ40	S4R257;D2KHZ9;A0A0A0MQF6;P16858;S4R1W1;Q3TUZ9;D3YYI5	11;11;11;11;10;6;6;2;2;2;2;2;2;2;2;1;1;1;1;1	11;11;11;11;10;6;6;2;2;2;2;2;2;2;2;1;1;1;1;1	11;11;11;11;10;6;6;2;2;2;2;2;2;2;2;1;1;1;1;1	Glyceraldehyde-3-phosphate dehydrogenase	Gapdh;GAPDH;Gm3839;Gm10481;Gm7293	;;;;;;	20	11	11	11	8	4	4	2	3	6	4	5	7	8	4	4	2	3	6	4	5	7	8	4	4	2	3	6	4	5	7	58.2	58.2	58.2	29.939	280	280;333;359;333;333;144;336;77;96;136;156;236;438;440;440;55;121;151;183;209	0	62.219	By MS/MS	By MS/MS	By MS/MS
Q58E64;Q3UA81;P10126;Q3TII3;Q3UZQ3;D3YZ68;P62631;D3Z3I8;Q4FZE5	Q58E64;Q3UA81;P10126;Q3TII3;Q3UZQ3	11;11;11;10;10;5;5;4;3	11;11;11;10;10;5;5;4;3	11;11;11;10;10;5;5;4;3	Elongation factor 1-alpha;Elongation factor 1-alpha 1	Eef1a1	;;;;	9	11	11	11	8	3	3	3	4	7	3	5	8	8	3	3	3	4	7	3	5	8	8	3	3	3	4	7	3	5	8	31.4	31.4	31.4	50.113	462	462;462;462;462;462;249;463;186;108	0	91.696	By MS/MS	By MS/MS	By MS/MS
Q5SS40;P62259;Q8BPH1;D6REF3;F6WA09;Q3V453	Q5SS40;P62259;Q8BPH1;D6REF3;F6WA09	12;12;10;6;6;3	12;12;10;6;6;3	10;10;8;5;5;2	14-3-3 protein epsilon	Ywhae	;;;;	6	12	12	10	8	3	3	4	4	6	3	6	8	8	3	3	4	4	6	3	6	8	6	2	2	2	3	4	2	5	7	47.1	47.1	40	29.174	255	255;255;255;130;154;91	0	48.764	By MS/MS	By MS/MS	By MS/MS
P63101;D3YXN6;Q3UA58;Q8BWN0;D3YXF4	P63101	11;4;4;4;2	9;3;3;3;2	8;3;2;3;2	14-3-3 protein zeta/delta	Ywhaz		5	11	9	8	8	6	5	7	4	9	2	7	7	6	5	4	5	3	7	1	6	6	5	4	3	4	2	6	1	5	5	53.5	46.1	42.4	27.771	245	245;88;112;117;45	0	80.143	By MS/MS	By MS/MS	By MS/MS
Q99KI0	Q99KI0	8	8	8	Aconitate hydratase, mitochondrial	Aco2		1	8	8	8	8	0	0	0	0	4	0	0	0	8	0	0	0	0	4	0	0	0	8	0	0	0	0	4	0	0	0	11.3	11.3	11.3	85.462	780	780	0	14.156	By MS/MS
P48036;A0A0G2JGQ0	P48036	13;5	13;5	13;5	Annexin A5	Anxa5		2	13	13	13	9	1	1	6	0	7	1	7	6	9	1	1	6	0	7	1	7	6	9	1	1	6	0	7	1	7	6	43.9	43.9	43.9	35.752	319	319;137	0	62.56	By MS/MS	By MS/MS	By matching
Q80Y52;Q3UIF3;Q3TKA2;P07901;Q3TJU7;A0PJ91;Q3TKB9;Q8C5U3;Q3TKG0;Q8C2A9;B7ZC50;A2A6A2;B7ZC49	Q80Y52;Q3UIF3;Q3TKA2;P07901;Q3TJU7;A0PJ91;Q3TKB9;Q8C5U3;Q3TKG0	14;14;14;14;12;12;11;11;11;4;3;1;1	9;9;9;9;9;7;7;7;7;1;0;0;0	9;9;9;9;9;7;7;7;7;1;0;0;0	Heat shock protein HSP 90-alpha	Hsp90aa1	;;;;;;;;	13	14	9	9	9	1	2	3	5	7	4	8	8	5	0	0	1	3	3	2	5	5	5	0	0	1	3	3	2	5	5	23.1	15.3	15.3	84.787	733	733;733;733;733;556;565;556;557;557;274;201;98;103	0	70.79	By MS/MS	By matching	By matching
P47867;P47867-2	P47867;P47867-2	15;14	15;14	15;14	Secretogranin-3	Scg3	;	2	15	15	15	9	3	4	9	1	14	2	6	3	9	3	4	9	1	14	2	6	3	9	3	4	9	1	14	2	6	3	42.7	42.7	42.7	53.326	471	471;466	0	82.795	By MS/MS	By MS/MS	By MS/MS
Q5FW97;P17182;Q6PHC1;Q8CF78;B0QZL1;B1ARR7	Q5FW97;P17182;Q6PHC1;Q8CF78;B0QZL1	15;15;11;9;8;6	15;15;11;9;8;6	13;13;11;7;6;4	Alpha-enolase;Enolase	EG433182;Eno1	;;;;	6	15	15	13	9	5	2	3	3	8	4	9	9	9	5	2	3	3	8	4	9	9	7	4	2	2	2	6	3	8	8	48.2	48.2	41	47.14	434	434;434;366;321;221;119	0	49.776	By MS/MS	By MS/MS	By MS/MS
P56480	P56480	10	10	10	ATP synthase subunit beta, mitochondrial	Atp5b		1	10	10	10	9	0	2	3	1	7	0	3	3	9	0	2	3	1	7	0	3	3	9	0	2	3	1	7	0	3	3	27.8	27.8	27.8	56.3	529	529	0	25.124	By MS/MS		By matching
P14152;B1ATQ3	P14152	10;2	10;2	10;2	Malate dehydrogenase, cytoplasmic	Mdh1		2	10	10	10	9	2	4	1	0	7	0	7	6	9	2	4	1	0	7	0	7	6	9	2	4	1	0	7	0	7	6	29.9	29.9	29.9	36.511	334	334;156	0	19.896	By MS/MS	By matching	By MS/MS
Q8K016;G3X977;Q61703	Q8K016;G3X977;Q61703	15;15;15	1;1;1	1;1;1	Inter-alpha-trypsin inhibitor heavy chain H2	Itih2	;;	3	15	1	1	10	10	10	9	14	9	14	12	9	1	0	0	0	0	0	0	0	0	1	0	0	0	0	0	0	0	0	13.5	3.5	3.5	105.94	946	946;950;946	0	2.5991	By MS/MS	By matching	By matching
D3Z6P0-2;D3Z6P0;F6S5U2;F6Q519	D3Z6P0-2;D3Z6P0;F6S5U2	11;11;6;3	11;11;6;3	11;11;6;3	Protein disulfide-isomerase A2	Pdia2	;;	4	11	11	11	10	4	6	2	1	11	0	0	1	10	4	6	2	1	11	0	0	1	10	4	6	2	1	11	0	0	1	24	24	24	57.959	524	524;527;225;154	0	19.772	By MS/MS	By MS/MS	By MS/MS
P09411;S4R2M7;P09041	P09411	11;5;2	11;5;2	11;5;2	Phosphoglycerate kinase 1	Pgk1		3	11	11	11	10	1	1	3	1	6	1	3	4	10	1	1	3	1	6	1	3	4	10	1	1	3	1	6	1	3	4	31.7	31.7	31.7	44.55	417	417;255;417	0	15.477	By MS/MS	By matching	By matching
Q8C153;Q3UZ14;Q3UMI7;Q3UDC8;Q3TX47;Q3TWX1;Q3TLB1;Q3TJZ1;P58252;Q6P9L9;Q8BMA8;Q3TW58;Q3UBL9;Q3TK17;Q3TSK4;Q3TPG2;Q99LT6;Q61509;O89070;O89069	Q8C153;Q3UZ14;Q3UMI7;Q3UDC8;Q3TX47;Q3TWX1;Q3TLB1;Q3TJZ1;P58252;Q6P9L9;Q8BMA8;Q3TW58;Q3UBL9;Q3TK17;Q3TSK4;Q3TPG2;Q99LT6	17;17;17;17;17;17;17;17;17;16;16;16;16;16;12;11;9;8;1;1	17;17;17;17;17;17;17;17;17;16;16;16;16;16;12;11;9;8;1;1	17;17;17;17;17;17;17;17;17;16;16;16;16;16;12;11;9;8;1;1	Elongation factor 2	Eef2	;;;;;;;;;;;;;;;;	20	17	17	17	10	2	1	3	2	5	1	8	11	10	2	1	3	2	5	1	8	11	10	2	1	3	2	5	1	8	11	26	26	26	95.257	858	858;858;858;858;858;858;858;858;858;843;858;858;858;858;418;367;287;268;109;259	0	33.316	By MS/MS	By MS/MS	By matching
A0A0A0MQA5;P68368;A0A087WRB4;A0A087WQS4;A0A087WSB0;A0A087WSL5;A0A087WS35	A0A0A0MQA5;P68368	16;16;5;5;3;3;1	3;3;2;2;2;2;1	3;3;2;2;2;2;1	Tubulin alpha-4A chain	Tuba4a	;	7	16	3	3	10	5	2	5	5	7	7	6	13	1	2	1	1	2	1	2	2	2	1	2	1	1	2	1	2	2	2	45.7	9.4	9.4	52.793	477	477;448;100;125;81;89;75	0	8.7483	By MS/MS	By MS/MS	By matching
Q9QZ83	Q9QZ83	19	2	2		Actg1		1	19	2	2	10	11	9	11	19	8	18	15	13	1	1	1	1	2	1	2	2	2	1	1	1	1	2	1	2	2	2	57	5.6	5.6	43.6	393	393	0	53.878	By MS/MS	By MS/MS	By MS/MS
Q5FWB7;A6ZI44;P05064;Q6NY00;D3YWI1;Q9CPQ9;A6ZI46;A0A0U1RPN8;D3YV98;A0A0U1RPT5;D3Z510;A6ZI47;P05063;Q3UER1;Q3TJ66;Q91Y97	Q5FWB7;A6ZI44;P05064;Q6NY00;D3YWI1;Q9CPQ9;A6ZI46;A0A0U1RPN8	14;14;14;11;10;9;9;7;6;6;5;4;3;1;1;1	14;14;14;11;10;9;9;7;6;6;5;4;3;1;1;1	14;14;14;11;10;9;9;7;6;6;5;4;3;1;1;1	Fructose-bisphosphate aldolase;Fructose-bisphosphate aldolase A	Aldoa;Aldoart1	;;;;;;;	16	14	14	14	10	2	4	0	2	7	1	8	10	10	2	4	0	2	7	1	8	10	10	2	4	0	2	7	1	8	10	52.5	52.5	52.5	39.355	364	364;418;364;364;237;364;419;190;193;209;131;364;363;364;364;364	0	69.068	By MS/MS	By matching	By MS/MS
Q03517;Q4W8U9	Q03517;Q4W8U9	17;16	17;16	17;16	Secretogranin-2;Secretoneurin;Manserin	Scg2	;	2	17	17	17	10	3	5	6	0	13	2	6	8	10	3	5	6	0	13	2	6	8	10	3	5	6	0	13	2	6	8	33.2	33.2	33.2	70.643	617	617;577	0	53.58	By MS/MS	By MS/MS	By MS/MS
Q7TPZ8	Q7TPZ8	14	13	13	Carboxypeptidase A1	Cpa1		1	14	13	13	10	6	7	6	1	12	0	0	0	9	6	6	6	1	12	0	0	0	9	6	6	6	1	12	0	0	0	41.3	39.4	39.4	47.384	419	419	0	37.037	By MS/MS	By MS/MS	By MS/MS
Q542G9;P07356;Q3UCD3;Q9CZI7;B0V2N7;B0V2N8;Q99KH3;B0V2N5	Q542G9;P07356;Q3UCD3;Q9CZI7;B0V2N7;B0V2N8;Q99KH3;B0V2N5	11;11;10;10;8;7;7;6	11;11;10;10;8;7;7;6	11;11;10;10;8;7;7;6	Annexin;Annexin A2	Anxa2	;;;;;;;	8	11	11	11	10	1	1	2	0	10	0	0	0	10	1	1	2	0	10	0	0	0	10	1	1	2	0	10	0	0	0	36.6	36.6	36.6	38.676	339	339;339;339;339;196;176;222;272	0	40.911	By MS/MS	By MS/MS	By MS/MS
B2RS76	B2RS76	15	15	14		Cpb1		1	15	15	14	11	7	9	8	4	13	2	2	3	11	7	9	8	4	13	2	2	3	10	7	8	8	4	13	2	2	3	47.7	47.7	45.8	47.573	415	415	0	83.392	By MS/MS	By MS/MS	By MS/MS
P26339;Q3UN28	P26339;Q3UN28	20;13	20;13	20;13	Chromogranin-A;Pancreastatin;Beta-granin;WE-14;Catestatin;GE-25;Serpinin-RRG;Serpinin;p-Glu serpinin precursor	Chga	;	2	20	20	20	11	9	7	13	1	14	5	15	15	11	9	7	13	1	14	5	15	15	11	9	7	13	1	14	5	15	15	49.9	49.9	49.9	51.789	463	463;314	0	323.31	By MS/MS	By MS/MS	By MS/MS
Q3UBP6;Q3UBQ4	Q3UBP6;Q3UBQ4	21;19	1;1	0;0		Actb	;	2	21	1	0	11	12	10	13	19	10	18	17	15	1	1	1	1	1	1	1	1	1	0	0	0	0	0	0	0	0	0	62.7	4.3	0	41.768	375	375;374	0	37.093	By MS/MS	By MS/MS	By MS/MS
B2MWM9;P14211;Q3UWP8;Q62041	B2MWM9;P14211;Q3UWP8	12;12;11;1	12;12;11;1	12;12;11;1	Calreticulin	Calr	;;	4	12	12	12	11	3	2	4	0	9	0	9	6	11	3	2	4	0	9	0	9	6	11	3	2	4	0	9	0	9	6	45.9	45.9	45.9	47.994	416	416;416;368;178	0	68.832	By MS/MS	By MS/MS	By MS/MS
Q4KL81;P63260;Q3TSB7;Q3UD81;G3UYG0;B1ATY1	Q4KL81;P63260;Q3TSB7;Q3UD81	22;22;21;12;9;9	1;1;1;1;1;1	0;0;0;0;0;0	Actin, cytoplasmic 2;Actin, cytoplasmic 2, N-terminally processed	Actg1	;;;	6	22	1	0	12	13	11	14	20	10	19	18	16	1	1	1	1	1	0	1	1	1	0	0	0	0	0	0	0	0	0	66.1	4.5	0	41.792	375	375;375;375;235;132;153	0	8.1774	By MS/MS	By MS/MS	By MS/MS
Q543R4;Q00493	Q543R4;Q00493	19;19	19;19	19;19	Carboxypeptidase E	Cpe	;	2	19	19	19	12	4	5	12	1	15	4	15	13	12	4	5	12	1	15	4	15	13	12	4	5	12	1	15	4	15	13	46	46	46	53.255	476	476;476	0	121.39	By MS/MS	By MS/MS	By MS/MS
Q71LX8;P11499;Q80YC2;Q811H6;E9Q3D6;D3Z1R1;E9PX27;E9Q0C3	Q71LX8;P11499	15;15;5;5;4;3;3;2	13;13;5;5;4;1;1;2	8;8;3;3;3;0;0;2	Heat shock protein HSP 90-beta	Hsp90ab1	;	8	15	13	8	12	1	5	4	3	11	3	9	8	11	1	4	4	3	10	3	7	7	7	0	2	2	1	6	1	4	4	25.8	23.9	16	83.28	724	724;724;363;378;189;76;112;161	0	60.107	By MS/MS	By MS/MS	By MS/MS
Q3UAF7;Q3UAF6;Q3U5R4;B2RRX1;P60710;Q3UAA9;Q3UA89;Q3U939;Q3U804;Q3UGS0;Q61276;Q3TIJ9;Q3UCF8;E9Q1F2;E9Q5F4;G3UZ07;Q61272;A1E281;Q99NC5;E9Q606;O89054;F8WGM8;E9Q2D1;Q6IWE2;F6WX90;Q7M0E4;Q8CF71;V9GXQ2;A0A0U1RQ96;Q6GQT3;E9Q3M9	Q3UAF7;Q3UAF6;Q3U5R4;B2RRX1;P60710;Q3UAA9;Q3UA89;Q3U939;Q3U804;Q3UGS0;Q61276;Q3TIJ9;Q3UCF8;E9Q1F2;E9Q5F4;G3UZ07	22;22;22;22;22;21;21;20;20;20;19;19;18;17;15;11;9;8;8;8;6;5;5;4;3;2;2;2;2;1;1	22;22;22;22;22;21;21;20;20;20;19;19;18;17;15;11;9;8;8;8;6;5;5;4;3;2;2;2;2;1;1	0;0;0;0;0;0;0;0;0;0;0;0;0;0;0;0;0;0;0;0;0;0;0;0;0;0;0;0;0;0;0	Actin, cytoplasmic 1;Actin, cytoplasmic 1, N-terminally processed	Actb;Actg1	;;;;;;;;;;;;;;;	31	22	22	0	12	13	11	14	20	11	19	18	16	12	13	11	14	20	11	19	18	16	0	0	0	0	0	0	0	0	0	66.1	66.1	0	41.75	375	375;375;375;375;375;375;375;374;374;375;375;375;374;295;265;268;336;121;134;150;136;105;108;77;43;36;109;156;195;835;1175	0	287.69	By MS/MS	By MS/MS	By MS/MS
Q9JKR6;Q8VCI2;F6TRP3;E0CYZ2	Q9JKR6	15;7;3;2	15;7;3;2	15;7;3;2	Hypoxia up-regulated protein 1	Hyou1		4	15	15	15	12	0	2	1	1	4	0	5	2	12	0	2	1	1	4	0	5	2	12	0	2	1	1	4	0	5	2	23.3	23.3	23.3	111.18	999	999;504;227;172	0	26.279	By MS/MS		By matching
P11679	P11679	15;10;5;5;4	7;2;1;1;1	7;2;1;1;1	Keratin, type II cytoskeletal 8	Krt8	;	5	15	7	7	13	8	8	8	4	14	4	6	5	6	1	1	1	1	6	1	1	1	6	1	1	1	1	6	1	1	1	22.2	15.1	15.1	54.565	490	490;483;99;443;499	0	11.442	By MS/MS	By matching	By matching
P68369;Q52L87;Q3TIZ0;P68373;Q5FW91;P05214;Q9D9Y2;Q9JJZ2	P68369;Q52L87;Q3TIZ0;P68373;Q5FW91;P05214;Q9D9Y2	17;16;16;16;14;14;9;8	1;1;1;1;1;1;1;1	1;1;1;1;1;1;1;1	Tubulin alpha-1A chain;Tubulin alpha-1C chain;Tubulin alpha-3 chain	Tuba1a;Tuba1c;Tuba3a	;;;;;;	8	17	1	1	13	5	3	7	3	9	5	8	15	1	0	0	0	0	0	0	1	1	1	0	0	0	0	0	0	1	1	50.3	2.9	2.9	50.135	451	451;449;449;449;450;450;395;449	0	3.9337	By MS/MS	By matching	By matching
P05213;Q99KA2;O89052;Q3UX10	P05213;Q99KA2	17;13;5;1	17;13;5;1	0;0;0;0	Tubulin alpha-1B chain	Tuba1b	;	4	17	17	0	13	6	3	7	4	10	6	8	15	13	6	3	7	4	10	6	8	15	0	0	0	0	0	0	0	0	0	50.3	50.3	0	50.151	451	451;347;99;446	0	76.344	By MS/MS	By MS/MS	By MS/MS
P52480-2	P52480-2	17	1	1	Pyruvate kinase PKM	Pkm		1	17	1	1	14	1	1	5	0	11	0	9	11	0	0	0	0	0	0	0	0	1	0	0	0	0	0	0	0	0	1	40.5	1.5	1.5	57.984	531	531	0.00611	1.2106	By matching	By matching	By matching
Q3UBA6;Q3TZJ3;Q3TH56;Q3TEK2;P63017;Q504P4;Q3U9L2;Q3TF16;Q3TQ13;Q3UDS0;Q3ULM1;Q3TRH3;Q3TB63;Q3KQJ4;Q3TH04;Q3UXU1;B7U582;P17156;D3Z5E2;D3YW43;Q3UBR0;B2CSK2;A1L347;Q3TU85;Q3TAI8;A1E2B8;P16627;Q61696;P17879;Q9R2A1;Q61698;Q9QWU1;O88687;O88688;Q91ZU5;Q91ZU4	Q3UBA6;Q3TZJ3;Q3TH56;Q3TEK2;P63017;Q504P4;Q3U9L2;Q3TF16;Q3TQ13;Q3UDS0;Q3ULM1;Q3TRH3;Q3TB63;Q3KQJ4;Q3TH04	21;21;21;21;21;20;20;20;20;19;19;19;17;16;14;10;7;7;5;5;5;4;4;4;4;4;4;4;4;2;2;2;1;1;1;1	19;19;19;19;19;18;18;18;18;17;18;18;15;15;13;10;5;5;4;4;5;2;2;3;3;3;2;3;3;1;2;1;0;1;1;1	19;19;19;19;19;18;18;18;18;17;18;18;15;15;13;10;5;5;4;4;5;2;2;3;3;3;2;3;3;1;2;1;0;1;1;1	Heat shock cognate 71 kDa protein	Hspa8	;;;;;;;;;;;;;;	36	21	19	19	15	3	4	4	1	14	2	17	19	13	1	2	2	1	12	2	15	17	13	1	2	2	1	12	2	15	17	45.4	43.7	43.7	70.898	646	646;646;646;646;646;627;646;646;646;553;619;646;459;565;518;396;633;633;116;158;251;641;641;641;641;641;641;641;642;111;228;552;43;143;282;461	0	84.459	By MS/MS	By matching	By MS/MS
Q02257;F7CRC6;Q80VE7;Q3UZT7;Q02248;F7BAC9	Q02257	22;2;2;2;2;1	22;2;2;2;2;1	22;2;2;2;2;1	Junction plakoglobin	Jup		6	22	22	22	16	11	5	10	0	21	0	0	1	16	11	5	10	0	21	0	0	1	16	11	5	10	0	21	0	0	1	35.2	35.2	35.2	81.8	745	745;174;554;781;781;169	0	52.605	By MS/MS	By MS/MS	By MS/MS
Q91V38;Q3UAD6;P08113;Q3UBU0;Q3TUD6;Q8CCY5;Q8C2R2;F7C312;Q9CW12	Q91V38;Q3UAD6;P08113;Q3UBU0;Q3TUD6;Q8CCY5	21;21;21;20;12;12;10;10;1	21;21;21;20;12;12;10;10;1	19;19;19;18;12;12;8;10;1	Endoplasmin	Hsp90b1	;;;;;	9	21	21	19	16	3	6	6	0	11	1	12	7	16	3	6	6	0	11	1	12	7	15	3	5	6	0	10	1	10	6	30.2	30.2	28.4	92.489	802	802;802;802;802;612;615;277;373;141	0	51.441	By MS/MS	By matching	By MS/MS
Q3UDR2;Q3URP6;Q3U738;Q3TWE3;Q3TIM0;Q3THC3;Q3TF72;P09103;Q3TGS0;Q3UBY9;Q3UJA8;Q3UA23;Q3TT76;Q3TIQ5;E9Q8G8	Q3UDR2;Q3URP6;Q3U738;Q3TWE3;Q3TIM0;Q3THC3;Q3TF72;P09103;Q3TGS0;Q3UBY9;Q3UJA8;Q3UA23;Q3TT76	17;17;17;17;17;17;17;17;16;16;16;16;11;6;6	17;17;17;17;17;17;17;17;16;16;16;16;11;6;6	17;17;17;17;17;17;17;17;16;16;16;16;11;6;6	Protein disulfide-isomerase	P4hb	;;;;;;;;;;;;	15	17	17	17	16	6	7	7	7	16	2	10	9	16	6	7	7	7	16	2	10	9	16	6	7	7	7	16	2	10	9	38.2	38.2	38.2	56.6	505	505;509;509;509;509;509;509;509;509;509;509;509;385;144;165	0	98.802	By MS/MS	By MS/MS	By MS/MS
P52480;Q3UEH4;E9Q509;Q3UEI4;A7MCU9;G3X925;P53657	P52480	18;1;1;1;1;1;1	18;1;1;1;1;1;1	2;0;0;0;0;0;0	Pyruvate kinase PKM	Pkm		7	18	18	2	16	1	2	6	0	13	0	9	11	16	1	2	6	0	13	0	9	11	2	0	1	1	0	2	0	0	1	45.2	45.2	6.2	57.844	531	531;543;543;546;570;574;574	0	192.88	By MS/MS	By matching	By MS/MS
Q8C5B4;E9PV85;Q61297;Q61298	Q8C5B4;E9PV85	25;16;8;7	1;0;0;1	1;0;0;1	Alpha-amylase	Amy2a1	;	4	25	1	1	17	21	16	19	21	20	11	11	9	1	1	1	1	1	1	1	1	1	1	1	1	1	1	1	1	1	1	61.2	2.6	2.6	57.336	508	508;245;232;242	0	7.7055	By MS/MS	By MS/MS	By MS/MS
P00688;Q61299	P00688	25;5	25;5	1;1	Pancreatic alpha-amylase	Amy2		2	25	25	1	17	21	16	19	21	20	10	11	9	17	21	16	19	21	20	10	11	9	1	1	1	1	1	1	0	1	1	61.2	61.2	2.6	57.318	508	508;179	0	323.31	By MS/MS	By MS/MS	By MS/MS
Q3TED3;Q3V117;Q91V92;Q3UEA1;Q8VDM8;Q3UVY4;Q3TS02;Q99K05;Q6P063	Q3TED3;Q3V117;Q91V92;Q3UEA1;Q8VDM8	33;33;33;30;19;12;12;7;3	33;33;33;30;19;12;12;7;3	33;33;33;30;19;12;12;7;3	ATP-citrate synthase	Acly	;;;;	9	33	33	33	19	2	2	6	3	7	1	24	25	19	2	2	6	3	7	1	24	25	19	2	2	6	3	7	1	24	25	40.1	40.1	40.1	119.62	1091	1091;1101;1091;1034;592;436;491;195;117	0	126.78	By MS/MS	By matching	By MS/MS
P27773;F6Q404	P27773	26;3	26;3	26;3	Protein disulfide-isomerase A3	Pdia3		2	26	26	26	19	1	3	5	0	15	0	12	10	19	1	3	5	0	15	0	12	10	19	1	3	5	0	15	0	12	10	59.2	59.2	59.2	56.678	505	505;124	0	101.65	By MS/MS	By matching	By MS/MS
Q3U9G2;Q3TWF2;P20029;Q9DC41;Q3TKF8;Q3TI47;Q3U7T8;Q3U6V3;Q3UEM8;Q3TUS2	Q3U9G2;Q3TWF2;P20029;Q9DC41;Q3TKF8;Q3TI47;Q3U7T8;Q3U6V3;Q3UEM8	25;25;25;24;24;24;23;22;20;8	25;25;25;24;24;24;23;22;20;8	23;23;23;22;22;22;21;20;18;8	78 kDa glucose-regulated protein	Hspa5	;;;;;;;;	10	25	25	23	21	8	11	13	7	19	2	19	17	21	8	11	13	7	19	2	19	17	19	6	9	11	7	17	2	17	15	47.6	47.6	46	72.405	655	655;655;655;655;655;655;619;655;520;236	0	146.84	By MS/MS	By MS/MS	By MS/MS
E9Q557;E9PZW0;Q9CV95;Q8BP77	E9Q557;E9PZW0	47;32;8;5	47;32;8;5	47;32;8;5	Desmoplakin	Dsp	;	4	47	47	47	30	15	7	14	2	44	2	5	2	30	15	7	14	2	44	2	5	2	30	15	7	14	2	44	2	5	2	16.3	16.3	16.3	332.91	2883	2883;2284;474;482	0	99.321	By MS/MS	By MS/MS	By MS/MS
Q3UEK0
Q61833
Q3UDA7
Q8C2E1
A0A0J9YUH8
Q3UKB4
D6RI51
Q1JUQ7
Q8BUY8
Q642I5
A0A087WP24
P12960
Q8CG46-2
Q4FJQ6
Q8R393
S4R2B5
A0A0U1RQ57
Q61425
A6H6Q4
G3UY13
Q04857
Q2T9H5
P16125
D3YXH9
F6W4D3
Q6PGF7
H7BWY6
Q9Z1R3
Q64374
Q6VEU6
Q3UN43
P10639
B1AZS9
Q3TG17
Q545F0
A5GZX3
A1L0U6
Q3U5K7
Q58E35
Q80ZP8
Q91Z57
A0A087WNN3
G3UYV7
Q5BLK2
A4FUS1
Q9JK98
P63028
Q8VCK2
Q9D1D4
Q3TNZ8
Q3UH62
Q14BR4
Q6ZQ38
S4R256
Q80TA9
B7ZWL9
P40142
Q8BKE0
Q80WS3
Q91Z61
Q3URM4
Q5NCU4
Q8K2T2
Q99KE8-3
Q3V0F6
Q501L5
Q3TE53
Q3UN37
G3X9K3
G3UWN9
Q3TGB1
K3W4N7
Q78IK2
F6WHQ7
P05201
Q9CRJ5
Q4KML8
Q3TQP7
Q8CJ40-2
Q8R016
A0A0U1RPX7
Q8C4K6
Q9Z2L2
Q3U131
Q3UWH6
A0A0A0MQ97
Q8C1X9
Q3UPK6
G5E8D1
Q3UEN1
P97350
D3YV69
Q91VR8
Q8CHR4
Q5HZY7
M0QWX7
Q9DAM4
Q3UBF4
P38647
Q50HX3
Q3TEG5
Q3ULW0
Q3UG68
Q4FJX9
Q80U51
P97298
Q546G4
E9Q7H5
A0A0A0MQM0
P68510
P97807-2
Q5RKP4
Q8VC94
F8WIX8
Q9WVA4
Q32MU0
Q64727
E9Q1Y3
Q3TND1
P61458
O08553
Q61171
Q3UZU8
Q91WD9
Q3TCL2
B2CY77
P19157
Q5SZA3
Q3U344
Q642K0
Q497D7
Q58EA6
A0A087WS46
Q4FK57
A0A0R4J293
Q80U29
Q545V6
Q0QEW9
Q9D8U3
D3Z6I8
F7A6H4
Q545J0
Q3TWM9
P48678-3
Q9D2Q8
Q3U6E4
Q542H2
Q8C1Y3
Q3UB63
Q80XJ7
Q3U6K8
Q3TWK8
Q792Y6
Q6IMF0
Q9JJ20
Q9CY10
A6BLY7
Q61782
D3Z6E4
Q9DCY1
P68040
A8IP69
P05208
Q07797
Q99PT1
Q5M8R8
Q4FZK2
P99027
A2A5N2
B2RTL6
Q91VL4
Q545I7
Q3TT51
A0JLV3
Q5EEX1
D3YW52
Q8BPI7
Q5M9K1
Q3UDU4
Q544Y7
Q9QXV0
A5JUZ1
A0A0N4SUM2
Q3UKA4
E0CZ27
Q9D0A2
E0CXB1
Q3TVS6
P15105
A0A097PUG1
P54071
Q9ER05
Q8C2K0
F6UFG6
Q0PD65
Q8BW75
Q3UE86
Q9CQ52
B9EIU2
Q9D7Y7
Q8BFZ3
Q3TLL6
Q5SX49
Q53ZU7
Q99LL6
Q3U7Z6
P55095
Q5SUV8
A0A0R4J0Z1
A2A813
Q5RKP0
Q4FK36
P08249
B9EHN0
Q4KL76
Q5SUC3
P63038
O54994
A0A097PUD0
B2RQH0
Q8VDD5
Q54AH9
Q9R0T7
Q5BKQ4
Q5EBQ2
Q8VI54
Q5SVY2
Q792Z1
Q3UZV3
Q01853
B2RTM0
P62204
P08228
Q545A2
Q8C6F9
A0A0B6VSQ6
P05202
Q8BIS2
A3KML3
Q5NC82
Q3THH1
P50396
Q9CR35
Q91X79
P35700
Q5SXR6
A8DUK0
B2RSN3
Q3UUX9
P99024
E9Q704
Q1A602
P17751
Q3UV17
Q04447
Q14DR9
D3Z6F5
Q6P8U6
Q543J5
P68372
S4R257
Q58E64
Q5SS40
P63101
Q99KI0
P48036
Q80Y52
P47867
Q5FW97
P56480
P14152
Q8K016
D3Z6P0-2
P09411
Q8C153
A0A0A0MQA5
Q9QZ83
Q5FWB7
Q03517
Q7TPZ8
Q542G9
B2RS76
P26339
Q3UBP6
B2MWM9
Q4KL81
Q543R4
Q71LX8
Q3UAF7
Q9JKR6
P11679
P68369
P05213
P52480-2
Q3UBA6
Q02257
Q91V38
Q3UDR2
P52480
Q8C5B4
P00688
Q3TED3
P27773
Q3U9G2
E9Q557
[truncated: 63 more columns]

## Sheet: Normal-2
Protein IDs	Majority protein IDs	Peptide counts (all)	Peptide counts (razor+unique)	Peptide counts (unique)	Protein names	Gene names	Fasta headers	Number of proteins	Peptides	Razor + unique peptides	Unique peptides	Peptides 1EG-1	Peptides 1EG-2	Peptides 1EG-3	Peptides 2EG-1	Peptides 2EG-2	Peptides 2EG-3	Peptides Normal-1	Peptides Normal-2	Peptides Normal-3	Razor + unique peptides 1EG-1	Razor + unique peptides 1EG-2	Razor + unique peptides 1EG-3	Razor + unique peptides 2EG-1	Razor + unique peptides 2EG-2	Razor + unique peptides 2EG-3	Razor + unique peptides Normal-1	Razor + unique peptides Normal-2	Razor + unique peptides Normal-3	Unique peptides 1EG-1	Unique peptides 1EG-2	Unique peptides 1EG-3	Unique peptides 2EG-1	Unique peptides 2EG-2	Unique peptides 2EG-3	Unique peptides Normal-1	Unique peptides Normal-2	Unique peptides Normal-3	Sequence coverage [%]	Unique + razor sequence coverage [%]	Unique sequence coverage [%]	Mol. weight [kDa]	Sequence length	Sequence lengths	Q-value	Score	Identification type 1EG-1	Identification type 1EG-2	Identification type 1EG-3
Q8C5B4;E9PV85;Q61297;Q61298	Q8C5B4;E9PV85	25;16;8;7	1;0;0;1	1;0;0;1	Alpha-amylase	Amy2a1	;	4	25	1	1	19	21	20	11	11	9	17	21	16	1	1	1	1	1	1	1	1	1	1	1	1	1	1	1	1	1	1	61.2	2.6	2.6	57.336	508	508;245;232;242	0	7.7055	By MS/MS	By MS/MS	By MS/MS
P00688;Q61299	P00688	25;5	25;5	1;1	Pancreatic alpha-amylase	Amy2		2	25	25	1	19	21	20	10	11	9	17	21	16	19	21	20	10	11	9	17	21	16	1	1	1	0	1	1	1	1	1	61.2	61.2	2.6	57.318	508	508;179	0	323.31	By MS/MS	By MS/MS	By MS/MS
E9Q557;E9PZW0;Q9CV95;Q8BP77	E9Q557;E9PZW0	47;32;8;5	47;32;8;5	47;32;8;5	Desmoplakin	Dsp	;	4	47	47	47	14	2	44	2	5	2	30	15	7	14	2	44	2	5	2	30	15	7	14	2	44	2	5	2	30	15	7	16.3	16.3	16.3	332.91	2883	2883;2284;474;482	0	99.321	By MS/MS	By MS/MS	By MS/MS
Q4KL81;P63260;Q3TSB7;Q3UD81;G3UYG0;B1ATY1	Q4KL81;P63260;Q3TSB7;Q3UD81	22;22;21;12;9;9	1;1;1;1;1;1	0;0;0;0;0;0	Actin, cytoplasmic 2;Actin, cytoplasmic 2, N-terminally processed	Actg1	;;;	6	22	1	0	14	20	10	19	18	16	12	13	11	1	1	0	1	1	1	1	1	1	0	0	0	0	0	0	0	0	0	66.1	4.5	0	41.792	375	375;375;375;235;132;153	0	8.1774	By MS/MS	By MS/MS	By matching
Q3UAF7;Q3UAF6;Q3U5R4;B2RRX1;P60710;Q3UAA9;Q3UA89;Q3U939;Q3U804;Q3UGS0;Q61276;Q3TIJ9;Q3UCF8;E9Q1F2;E9Q5F4;G3UZ07;Q61272;A1E281;Q99NC5;E9Q606;O89054;F8WGM8;E9Q2D1;Q6IWE2;F6WX90;Q7M0E4;Q8CF71;V9GXQ2;A0A0U1RQ96;Q6GQT3;E9Q3M9	Q3UAF7;Q3UAF6;Q3U5R4;B2RRX1;P60710;Q3UAA9;Q3UA89;Q3U939;Q3U804;Q3UGS0;Q61276;Q3TIJ9;Q3UCF8;E9Q1F2;E9Q5F4;G3UZ07	22;22;22;22;22;21;21;20;20;20;19;19;18;17;15;11;9;8;8;8;6;5;5;4;3;2;2;2;2;1;1	22;22;22;22;22;21;21;20;20;20;19;19;18;17;15;11;9;8;8;8;6;5;5;4;3;2;2;2;2;1;1	0;0;0;0;0;0;0;0;0;0;0;0;0;0;0;0;0;0;0;0;0;0;0;0;0;0;0;0;0;0;0	Actin, cytoplasmic 1;Actin, cytoplasmic 1, N-terminally processed	Actb;Actg1	;;;;;;;;;;;;;;;	31	22	22	0	14	20	11	19	18	16	12	13	11	14	20	11	19	18	16	12	13	11	0	0	0	0	0	0	0	0	0	66.1	66.1	0	41.75	375	375;375;375;375;375;375;375;374;374;375;375;375;374;295;265;268;336;121;134;150;136;105;108;77;43;36;109;156;195;835;1175	0	287.69	By MS/MS	By MS/MS	By MS/MS
Q3UBP6;Q3UBQ4	Q3UBP6;Q3UBQ4	21;19	1;1	0;0		Actb	;	2	21	1	0	13	19	10	18	17	15	11	12	10	1	1	1	1	1	1	1	1	1	0	0	0	0	0	0	0	0	0	62.7	4.3	0	41.768	375	375;374	0	37.093	By MS/MS	By MS/MS	By MS/MS
Q02257;F7CRC6;Q80VE7;Q3UZT7;Q02248;F7BAC9	Q02257	22;2;2;2;2;1	22;2;2;2;2;1	22;2;2;2;2;1	Junction plakoglobin	Jup		6	22	22	22	10	0	21	0	0	1	16	11	5	10	0	21	0	0	1	16	11	5	10	0	21	0	0	1	16	11	5	35.2	35.2	35.2	81.8	745	745;174;554;781;781;169	0	52.605	By MS/MS		By MS/MS
Q9QZ83	Q9QZ83	19	2	2		Actg1		1	19	2	2	11	19	8	18	15	13	10	11	9	1	2	1	2	2	2	1	1	1	1	2	1	2	2	2	1	1	1	57	5.6	5.6	43.6	393	393	0	53.878	By MS/MS	By MS/MS	By MS/MS
Q8K016;G3X977;Q61703	Q8K016;G3X977;Q61703	15;15;15	1;1;1	1;1;1	Inter-alpha-trypsin inhibitor heavy chain H2	Itih2	;;	3	15	1	1	9	14	9	14	12	9	10	10	10	0	0	0	0	0	0	1	0	0	0	0	0	0	0	0	1	0	0	13.5	3.5	3.5	105.94	946	946;950;946	0	2.5991	By matching	By matching	By matching
P26339;Q3UN28	P26339;Q3UN28	20;13	20;13	20;13	Chromogranin-A;Pancreastatin;Beta-granin;WE-14;Catestatin;GE-25;Serpinin-RRG;Serpinin;p-Glu serpinin precursor	Chga	;	2	20	20	20	13	1	14	5	15	15	11	9	7	13	1	14	5	15	15	11	9	7	13	1	14	5	15	15	11	9	7	49.9	49.9	49.9	51.789	463	463;314	0	323.31	By MS/MS	By matching	By MS/MS
Q6IMF0;E9Q1Y9;B2RTB6;P97861;Q61726;Q9ERE2	Q6IMF0;E9Q1Y9;B2RTB6;P97861;Q61726;Q9ERE2	15;13;13;12;12;11;11	2;2;2;1;1;2;1	1;1;1;0;0;1;0	Keratin, type II cuticular Hb3;Keratin, type II cuticular Hb6;Keratin, type II cuticular Hb1	Krt83;5430421N21Rik;Krt86;Krt81	;;;;;;	7	15	2	1	2	10	11	1	2	2	3	8	4	0	0	2	0	1	1	0	0	0	0	0	1	0	1	1	0	0	0	28.9	3.6	1.8	54.628	495	495;479;479;486;486;495;481	0	5.4392	By matching	By matching	By MS/MS
P11679	P11679	15;10;5;5;4	7;2;1;1;1	7;2;1;1;1	Keratin, type II cytoskeletal 8	Krt8	;	5	15	7	7	8	4	14	4	6	5	13	8	8	1	1	6	1	1	1	6	1	1	1	1	6	1	1	1	6	1	1	22.2	15.1	15.1	54.565	490	490;483;99;443;499	0	11.442	By matching	By matching	By MS/MS
Q543J5;P32261	Q543J5;P32261	10;10	1;1	1;1	Antithrombin-III	Serpinc1	;	2	10	1	1	7	9	6	9	8	7	8	8	8	1	1	0	0	1	1	1	1	1	1	1	0	0	1	1	1	1	1	20	4.9	4.9	52.003	465	465;465	0	6.4548	By MS/MS	By MS/MS	By matching
Q8VI54;Q9R0G6;A1A557;A2VCQ0	Q8VI54;Q9R0G6;A1A557;A2VCQ0	10;10;9;9	3;3;2;2	3;3;2;2	Cartilage oligomeric matrix protein	Comp	;;;	4	10	3	3	7	5	5	6	7	7	5	8	8	2	1	2	1	2	2	2	2	2	2	1	2	1	2	2	2	2	2	16.8	5	5	82.175	755	755;755;755;759	0	42.101	By MS/MS	By MS/MS	By matching
Q3U9G2;Q3TWF2;P20029;Q9DC41;Q3TKF8;Q3TI47;Q3U7T8;Q3U6V3;Q3UEM8;Q3TUS2	Q3U9G2;Q3TWF2;P20029;Q9DC41;Q3TKF8;Q3TI47;Q3U7T8;Q3U6V3;Q3UEM8	25;25;25;24;24;24;23;22;20;8	25;25;25;24;24;24;23;22;20;8	23;23;23;22;22;22;21;20;18;8	78 kDa glucose-regulated protein	Hspa5	;;;;;;;;	10	25	25	23	13	7	19	2	19	17	21	8	11	13	7	19	2	19	17	21	8	11	11	7	17	2	17	15	19	6	9	47.6	47.6	46	72.405	655	655;655;655;655;655;655;619;655;520;236	0	146.84	By MS/MS	By MS/MS	By MS/MS
Q9CR35	Q9CR35	10	10	10	Chymotrypsinogen B;Chymotrypsin B chain A;Chymotrypsin B chain B;Chymotrypsin B chain C	Ctrb1		1	10	10	10	8	8	8	6	3	6	6	8	6	8	8	8	6	3	6	6	8	6	8	8	8	6	3	6	6	8	6	68.1	68.1	68.1	27.822	263	263	0	181.68	By MS/MS	By MS/MS	By MS/MS
B2RS76	B2RS76	15	15	14		Cpb1		1	15	15	14	8	4	13	2	2	3	11	7	9	8	4	13	2	2	3	11	7	9	8	4	13	2	2	3	10	7	8	47.7	47.7	45.8	47.573	415	415	0	83.392	By MS/MS	By MS/MS	By MS/MS
Q8BIS2;Q148Q7;E9Q1Z0	Q8BIS2;Q148Q7;E9Q1Z0	10;10;10;5	1;1;1;1	0;0;0;0		4732456N10Rik	;;;	4	10	1	0	6	3	9	3	5	5	6	6	7	0	0	1	0	0	0	0	0	0	0	0	0	0	0	0	0	0	0	12.8	2	0	58.266	538	538;538;538;511	0	2.1728	By matching	By matching	By MS/MS
Q9R0T7;Q9QUK9;Q3V2E0;G3UXD0;Q7M754;Q792Y9;Q9Z1R9	Q9R0T7;Q9QUK9;Q3V2E0;G3UXD0;Q7M754	8;6;6;4;4;2;2	8;6;6;4;4;2;2	3;3;3;2;1;0;0		Try4;Try5;Gm5409	;;;;	7	8	8	3	5	4	6	1	2	4	5	6	5	5	4	6	1	2	4	5	6	5	2	1	2	1	1	2	1	2	1	57.3	57.3	26.4	26.274	246	246;246;255;135;246;245;246	0	87.283	By MS/MS	By MS/MS	By MS/MS
Q5BKQ4	Q5BKQ4	9	9	9	Inactive pancreatic lipase-related protein 1	Pnliprp1		1	9	9	9	5	2	7	1	1	3	5	6	3	5	2	7	1	1	3	5	6	3	5	2	7	1	1	3	5	6	3	25.8	25.8	25.8	52.695	473	473	0	19.749	By MS/MS	By MS/MS	By MS/MS
P05213;Q99KA2;O89052;Q3UX10	P05213;Q99KA2	17;13;5;1	17;13;5;1	0;0;0;0	Tubulin alpha-1B chain	Tuba1b	;	4	17	17	0	7	4	10	6	8	15	13	6	3	7	4	10	6	8	15	13	6	3	0	0	0	0	0	0	0	0	0	50.3	50.3	0	50.151	451	451;347;99;446	0	76.344	By MS/MS	By MS/MS	By MS/MS
Q3UDR2;Q3URP6;Q3U738;Q3TWE3;Q3TIM0;Q3THC3;Q3TF72;P09103;Q3TGS0;Q3UBY9;Q3UJA8;Q3UA23;Q3TT76;Q3TIQ5;E9Q8G8	Q3UDR2;Q3URP6;Q3U738;Q3TWE3;Q3TIM0;Q3THC3;Q3TF72;P09103;Q3TGS0;Q3UBY9;Q3UJA8;Q3UA23;Q3TT76	17;17;17;17;17;17;17;17;16;16;16;16;11;6;6	17;17;17;17;17;17;17;17;16;16;16;16;11;6;6	17;17;17;17;17;17;17;17;16;16;16;16;11;6;6	Protein disulfide-isomerase	P4hb	;;;;;;;;;;;;	15	17	17	17	7	7	16	2	10	9	16	6	7	7	7	16	2	10	9	16	6	7	7	7	16	2	10	9	16	6	7	38.2	38.2	38.2	56.6	505	505;509;509;509;509;509;509;509;509;509;509;509;385;144;165	0	98.802	By MS/MS	By MS/MS	By MS/MS
P63101;D3YXN6;Q3UA58;Q8BWN0;D3YXF4	P63101	11;4;4;4;2	9;3;3;3;2	8;3;2;3;2	14-3-3 protein zeta/delta	Ywhaz		5	11	9	8	7	4	9	2	7	7	8	6	5	5	3	7	1	6	6	6	5	4	4	2	6	1	5	5	5	4	3	53.5	46.1	42.4	27.771	245	245;88;112;117;45	0	80.143	By MS/MS	By MS/MS	By MS/MS
Q3UV17	Q3UV17	9;4	1;0	1;0	Keratin, type II cytoskeletal 2 oral	Krt76		2	9	1	1	7	4	9	5	4	4	7	6	6	1	1	1	1	1	1	1	1	1	1	1	1	1	1	1	1	1	1	11.4	1.5	1.5	62.844	594	594;529	0	2.2063	By MS/MS	By MS/MS	By MS/MS
Q7TPZ8	Q7TPZ8	14	13	13	Carboxypeptidase A1	Cpa1		1	14	13	13	6	1	12	0	0	0	10	6	7	6	1	12	0	0	0	9	6	6	6	1	12	0	0	0	9	6	6	41.3	39.4	39.4	47.384	419	419	0	37.037	By MS/MS	By MS/MS	By MS/MS
Q3TWK8;B2CQD6;Q08879;Q08879-2;Q3TW70	Q3TWK8;B2CQD6;Q08879;Q08879-2	7;7;7;4;2	1;1;1;1;0	1;1;1;1;0	Fibulin-1	Fbln1	;;;	5	7	1	1	4	6	4	6	5	4	3	5	3	0	0	0	0	0	0	0	1	0	0	0	0	0	0	0	0	1	0	11.1	2.4	2.4	78.06	705	705;705;705;685;228	0	48.605	By matching	By matching	By matching
Q792Y6;P07146	Q792Y6;P07146	5;5	3;3	3;3	Anionic trypsin-2	Prss2	;	2	5	3	3	4	2	2	1	1	1	3	5	3	3	1	0	1	0	0	1	3	1	3	1	0	1	0	0	1	3	1	35.8	28.5	28.5	26.203	246	246;246	0	14.287	By MS/MS	By MS/MS	By matching
P68369;Q52L87;Q3TIZ0;P68373;Q5FW91;P05214;Q9D9Y2;Q9JJZ2	P68369;Q52L87;Q3TIZ0;P68373;Q5FW91;P05214;Q9D9Y2	17;16;16;16;14;14;9;8	1;1;1;1;1;1;1;1	1;1;1;1;1;1;1;1	Tubulin alpha-1A chain;Tubulin alpha-1C chain;Tubulin alpha-3 chain	Tuba1a;Tuba1c;Tuba3a	;;;;;;	8	17	1	1	7	3	9	5	8	15	13	5	3	0	0	0	0	1	1	1	0	0	0	0	0	0	1	1	1	0	0	50.3	2.9	2.9	50.135	451	451;449;449;449;450;450;395;449	0	3.9337	By matching	By matching	By matching
A0A0A0MQA5;P68368;A0A087WRB4;A0A087WQS4;A0A087WSB0;A0A087WSL5;A0A087WS35	A0A0A0MQA5;P68368	16;16;5;5;3;3;1	3;3;2;2;2;2;1	3;3;2;2;2;2;1	Tubulin alpha-4A chain	Tuba4a	;	7	16	3	3	5	5	7	7	6	13	10	5	2	1	2	1	2	2	2	1	2	1	1	2	1	2	2	2	1	2	1	45.7	9.4	9.4	52.793	477	477;448;100;125;81;89;75	0	8.7483	By MS/MS	By MS/MS	By matching
Q5FW97;P17182;Q6PHC1;Q8CF78;B0QZL1;B1ARR7	Q5FW97;P17182;Q6PHC1;Q8CF78;B0QZL1	15;15;11;9;8;6	15;15;11;9;8;6	13;13;11;7;6;4	Alpha-enolase;Enolase	EG433182;Eno1	;;;;	6	15	15	13	3	3	8	4	9	9	9	5	2	3	3	8	4	9	9	9	5	2	2	2	6	3	8	8	7	4	2	48.2	48.2	41	47.14	434	434;434;366;321;221;119	0	49.776	By MS/MS	By matching	By MS/MS
Q91X79	Q91X79	8	8	7	Chymotrypsin-like elastase family member 1	Cela1		1	8	8	7	6	8	6	3	2	4	6	5	5	6	8	6	3	2	4	6	5	5	6	7	6	2	2	4	6	5	5	50	50	47.4	28.9	266	266	0	140.18	By MS/MS	By MS/MS	By MS/MS
Q9ER05;Q9D7P8;Q9D960;Q9DC82	Q9ER05;Q9D7P8;Q9D960	7;6;6;3	7;6;6;3	7;6;6;3		Ctrl	;;	4	7	7	7	5	2	3	0	0	0	3	5	2	5	2	3	0	0	0	3	5	2	5	2	3	0	0	0	3	5	2	42.4	42.4	42.4	28.135	264	264;264;264;164	0	26.208	By MS/MS	By MS/MS	By MS/MS
Q6P8U6;Q9D950;Q4VBW7;P17892	Q6P8U6	14;6;1;1	14;6;1;1	14;6;1;1	Pancreatic triacylglycerol lipase	Pnlip		4	14	14	14	7	4	11	2	2	1	8	4	6	7	4	11	2	2	1	8	4	6	7	4	11	2	2	1	8	4	6	39.8	39.8	39.8	51.427	465	465;163;482;482	0	39.138	By MS/MS	By MS/MS	By MS/MS
P97298	P97298	5	1	1	Pigment epithelium-derived factor	Serpinf1		1	5	1	1	4	5	3	5	5	4	2	4	3	0	1	0	1	1	0	0	0	0	0	1	0	1	1	0	0	0	0	15.3	4.3	4.3	46.233	417	417	0	8.0734	By matching	By MS/MS	By matching
Q61782	Q61782	5;5	1;1	1;1			;	2	5	1	1	4	1	5	0	2	1	3	4	3	0	0	1	0	0	0	0	0	0	0	0	1	0	0	0	0	0	0	58.1	10.8	10.8	10.662	93	93;93	1	-2	By matching	By matching	By MS/MS
Q9CQ52;A2A9U8	Q9CQ52	7;1	6;1	6;1	Chymotrypsin-like elastase family member 3B	Cela3b		2	7	6	6	5	3	5	3	1	1	4	4	4	5	2	5	2	1	1	4	4	4	5	2	5	2	1	1	4	4	4	38.7	36.1	36.1	28.904	269	269;283	0	24.005	By MS/MS	By MS/MS	By MS/MS
B9EIU2;V9GZG9;V9GZQ6;V9GZJ5	B9EIU2;V9GZG9;V9GZQ6;V9GZJ5	8;7;7;6	2;1;1;1	1;0;0;0		C4a;Slp	;;;	4	8	2	1	4	7	2	5	7	4	4	4	4	0	2	0	1	2	1	0	0	0	0	1	0	1	1	1	0	0	0	4.2	1.7	0.4	193.73	1735	1735;1716;1735;1735	0.0061475	1.2274	By matching	By MS/MS	By matching
D3Z6P0-2;D3Z6P0;F6S5U2;F6Q519	D3Z6P0-2;D3Z6P0;F6S5U2	11;11;6;3	11;11;6;3	11;11;6;3	Protein disulfide-isomerase A2	Pdia2	;;	4	11	11	11	2	1	11	0	0	1	10	4	6	2	1	11	0	0	1	10	4	6	2	1	11	0	0	1	10	4	6	24	24	24	57.959	524	524;527;225;154	0	19.772	By MS/MS	By matching	By MS/MS
Q8BFZ3	Q8BFZ3	8	1	1	Beta-actin-like protein 2	Actbl2		1	8	1	1	4	7	4	6	5	6	4	4	5	0	0	0	0	0	1	0	1	1	0	0	0	0	0	1	0	1	1	24.5	3.2	3.2	42.004	376	376	1	-2	By matching	By matching	By matching
P05208	P05208	7	7	7	Chymotrypsin-like elastase family member 2A	Cela2a		1	7	7	7	3	5	5	1	2	1	3	4	3	3	5	5	1	2	1	3	4	3	3	5	5	1	2	1	3	4	3	47.2	47.2	47.2	28.913	271	271	0	52.905	By MS/MS	By MS/MS	By MS/MS
Q5SX49;Q8CEH8;Q5SX50;P62962;Q3U7V7;J3QMC2	Q5SX49;Q8CEH8;Q5SX50;P62962;Q3U7V7	5;5;5;5;4;2	2;2;2;2;2;1	2;2;2;2;2;1	Profilin;Profilin-1	Pfn1	;;;;	6	5	2	2	4	4	4	3	5	4	4	4	4	1	1	1	0	2	1	1	1	1	1	1	1	0	2	1	1	1	1	72.3	36.6	36.6	11.82	112	112;140;140;140;140;55	0	7.3583	By matching	By matching	By MS/MS
Q99LL6;P11087-2;P11087;Q60785	Q99LL6;P11087-2;P11087;Q60785	6;6;6;4;1	6;6;6;4;1	6;6;6;4;1	Collagen alpha-1(I) chain	Col1a1	;;;	5	6	6	6	2	2	1	3	4	4	4	4	4	2	2	1	3	4	4	4	4	4	2	2	1	3	4	4	4	4	4	11.2	11.2	11.2	58.804	589	589;1225;1453;325;114	0	61.299	By MS/MS	By MS/MS	By matching
B2RTL6;Q9Z1T2;E9PWF0;Q05895	B2RTL6;Q9Z1T2	5;5;1;1	4;4;1;1	4;4;1;1	Thrombospondin-4	Thbs4	;	4	5	4	4	4	3	1	4	5	5	3	4	4	3	2	0	3	4	4	2	3	3	3	2	0	3	4	4	2	3	3	6.3	5.3	5.3	106.37	963	963;963;919;956	0	35.275	By MS/MS	By MS/MS	By matching
Q543R4;Q00493	Q543R4;Q00493	19;19	19;19	19;19	Carboxypeptidase E	Cpe	;	2	19	19	19	12	1	15	4	15	13	12	4	5	12	1	15	4	15	13	12	4	5	12	1	15	4	15	13	12	4	5	46	46	46	53.255	476	476;476	0	121.39	By MS/MS	By matching	By MS/MS
S4R257;D2KHZ9;A0A0A0MQF6;P16858;S4R1W1;Q3TUZ9;D3YYI5;W8QM43;Q6IWE3;Q4VBD1;Q8CEV2;Q3V2I5;A0A0R4J0X7;S4R2G5;Q64467;S4R1W8;V9GXA7;V9GXK0;V9GX06;Q8BJ40	S4R257;D2KHZ9;A0A0A0MQF6;P16858;S4R1W1;Q3TUZ9;D3YYI5	11;11;11;11;10;6;6;2;2;2;2;2;2;2;2;1;1;1;1;1	11;11;11;11;10;6;6;2;2;2;2;2;2;2;2;1;1;1;1;1	11;11;11;11;10;6;6;2;2;2;2;2;2;2;2;1;1;1;1;1	Glyceraldehyde-3-phosphate dehydrogenase	Gapdh;GAPDH;Gm3839;Gm10481;Gm7293	;;;;;;	20	11	11	11	2	3	6	4	5	7	8	4	4	2	3	6	4	5	7	8	4	4	2	3	6	4	5	7	8	4	4	58.2	58.2	58.2	29.939	280	280;333;359;333;333;144;336;77;96;136;156;236;438;440;440;55;121;151;183;209	0	62.219	By MS/MS	By MS/MS	By MS/MS
Q5SVY2;Q3UAJ1;Q3TE63;P17742;Q9CZK9;F8VPN3;V9GXC1;V9GX31	Q5SVY2;Q3UAJ1;Q3TE63;P17742;Q9CZK9	9;9;9;9;7;3;2;2	9;9;9;9;7;3;2;2	9;9;9;9;7;3;2;2	Peptidyl-prolyl cis-trans isomerase;Peptidyl-prolyl cis-trans isomerase A;Peptidyl-prolyl cis-trans isomerase A, N-terminally processed	Ppia	;;;;	8	9	9	9	5	5	6	4	8	6	5	4	4	5	5	6	4	8	6	5	4	4	5	5	6	4	8	6	5	4	4	61	61	61	17.971	164	164;164;164;164;167;147;77;77	0	47.499	By MS/MS	By MS/MS	By MS/MS
Q792Z1	Q792Z1	6	2	2		Try10		1	6	2	2	5	3	5	1	2	3	5	4	4	2	1	2	1	2	2	2	1	1	2	1	2	1	2	2	2	1	1	42.3	15.4	15.4	26.221	246	246	0	10.054	By MS/MS	By MS/MS	By MS/MS
Q64727;Q3TEB0	Q64727	16;1	16;1	16;1	Vinculin	Vcl		2	16	16	16	2	9	0	9	5	4	2	4	2	2	9	0	9	5	4	2	4	2	2	9	0	9	5	4	2	4	2	23.7	23.7	23.7	116.72	1066	1066;379	0	100.86	By matching	By MS/MS
A8DUK0;P02088;A8DUL5;A8DUP5;A8DUP7;A8DUM2;A8DUP3;A8DUK2;B1Q450;A8DUK7;A8DUK4;E9Q223;A8DUP0;A8DUL2;A8DUL0;A8DUQ5;Q61650;A8DUL7;Q61348	A8DUK0;P02088;A8DUL5;A8DUP5;A8DUP7;A8DUM2;A8DUP3;A8DUK2;B1Q450;A8DUK7;A8DUK4;E9Q223;A8DUP0;A8DUL2;A8DUL0;A8DUQ5	8;8;7;7;7;7;6;6;5;5;5;4;4;4;4;4;3;3;2	6;6;5;5;5;5;5;4;3;3;3;3;3;2;2;2;2;1;2	2;2;1;2;2;2;2;0;1;0;0;0;0;0;0;0;2;0;2	Hemoglobin subunit beta-1	Hbbt1;Hbb-b1;HBB1;Hbb-bs	;;;;;;;;;;;;;;;	19	8	6	2	3	2	7	2	5	2	7	3	3	1	0	5	0	3	0	5	1	1	0	0	2	0	1	0	1	0	0	68.7	55.8	15	15.84	147	147;147;147;147;147;147;147;151;147;147;147;103;147;147;147;147;52;147;31	0	15.082	By matching	By matching	By MS/MS
Q9D7Y7;Q9CPN9	Q9D7Y7;Q9CPN9	5;5;1;1;1;1;1;1;1	5;5;1;1;1;1;1;1;1	5;5;1;1;1;1;1;1;1		2210010C04Rik	;	9	5	5	5	3	3	4	0	1	2	4	3	3	3	3	4	0	1	2	4	3	3	3	3	4	0	1	2	4	3	3	34.4	34.4	34.4	26.407	247	247;247;1473;1489;1506;1544;1549;1561;1577	0	19.455	By MS/MS	By MS/MS	By MS/MS
Q3UBA6;Q3TZJ3;Q3TH56;Q3TEK2;P63017;Q504P4;Q3U9L2;Q3TF16;Q3TQ13;Q3UDS0;Q3ULM1;Q3TRH3;Q3TB63;Q3KQJ4;Q3TH04;Q3UXU1;B7U582;P17156;D3Z5E2;D3YW43;Q3UBR0;B2CSK2;A1L347;Q3TU85;Q3TAI8;A1E2B8;P16627;Q61696;P17879;Q9R2A1;Q61698;Q9QWU1;O88687;O88688;Q91ZU5;Q91ZU4	Q3UBA6;Q3TZJ3;Q3TH56;Q3TEK2;P63017;Q504P4;Q3U9L2;Q3TF16;Q3TQ13;Q3UDS0;Q3ULM1;Q3TRH3;Q3TB63;Q3KQJ4;Q3TH04	21;21;21;21;21;20;20;20;20;19;19;19;17;16;14;10;7;7;5;5;5;4;4;4;4;4;4;4;4;2;2;2;1;1;1;1	19;19;19;19;19;18;18;18;18;17;18;18;15;15;13;10;5;5;4;4;5;2;2;3;3;3;2;3;3;1;2;1;0;1;1;1	19;19;19;19;19;18;18;18;18;17;18;18;15;15;13;10;5;5;4;4;5;2;2;3;3;3;2;3;3;1;2;1;0;1;1;1	Heat shock cognate 71 kDa protein	Hspa8	;;;;;;;;;;;;;;	36	21	19	19	4	1	14	2	17	19	15	3	4	2	1	12	2	15	17	13	1	2	2	1	12	2	15	17	13	1	2	45.4	43.7	43.7	70.898	646	646;646;646;646;646;627;646;646;646;553;619;646;459;565;518;396;633;633;116;158;251;641;641;641;641;641;641;641;642;111;228;552;43;143;282;461	0	84.459	By MS/MS	By matching	By MS/MS
Q91V38;Q3UAD6;P08113;Q3UBU0;Q3TUD6;Q8CCY5;Q8C2R2;F7C312;Q9CW12	Q91V38;Q3UAD6;P08113;Q3UBU0;Q3TUD6;Q8CCY5	21;21;21;20;12;12;10;10;1	21;21;21;20;12;12;10;10;1	19;19;19;18;12;12;8;10;1	Endoplasmin	Hsp90b1	;;;;;	9	21	21	19	6	0	11	1	12	7	16	3	6	6	0	11	1	12	7	16	3	6	6	0	10	1	10	6	15	3	5	30.2	30.2	28.4	92.489	802	802;802;802;802;612;615;277;373;141	0	51.441	By MS/MS		By MS/MS
Q91VL4;Q3TP88;Q3TUE2;Q3TX57;Q3TU64;Q01149	Q91VL4;Q3TP88;Q3TUE2;Q3TX57;Q3TU64;Q01149	4;4;4;4;4;4	4;4;4;4;4;4	4;4;4;4;4;4	Collagen alpha-2(I) chain	Col1a2	;;;;;	6	4	4	4	1	2	2	2	1	1	3	3	3	1	2	2	2	1	1	3	3	3	1	2	2	2	1	1	3	3	3	9.5	9.5	9.5	56.662	566	566;959;1241;1372;1372;1372	0	20.89	By MS/MS	By MS/MS	By matching
P47867;P47867-2	P47867;P47867-2	15;14	15;14	15;14	Secretogranin-3	Scg3	;	2	15	15	15	9	1	14	2	6	3	9	3	4	9	1	14	2	6	3	9	3	4	9	1	14	2	6	3	9	3	4	42.7	42.7	42.7	53.326	471	471;466	0	82.795	By MS/MS	By matching	By MS/MS
A0JLV3;B2RVD5;B2RTK3;Q8CBB6;Q921L4;Q8CGP2;Q8CGP1;Q6ZWY9;Q64525;Q64478;Q64475;P10854;P10853;Q8CGP2-2;A0JNS9;Q9D2U9;Q8CGP0;Q64524;P70696;Q8VEE3;G3X9D5	A0JLV3;B2RVD5;B2RTK3;Q8CBB6;Q921L4;Q8CGP2;Q8CGP1;Q6ZWY9;Q64525;Q64478;Q64475;P10854;P10853;Q8CGP2-2;A0JNS9;Q9D2U9;Q8CGP0;Q64524;P70696;Q8VEE3;G3X9D5	4;4;4;4;4;4;4;4;4;4;4;4;4;4;3;3;3;3;3;2;2	4;4;4;4;4;4;4;4;4;4;4;4;4;4;3;3;3;3;3;2;2	4;4;4;4;4;4;4;4;4;4;4;4;4;4;3;3;3;3;3;2;2	Histone H2B;Histone H2B type 1-P;Histone H2B type 1-K;Histone H2B type 1-C/E/G;Histone H2B type 2-B;Histone H2B type 1-H;Histone H2B type 1-B;Histone H2B type 1-M;Histone H2B type 1-F/J/L;Histone H2B type 3-A;Histone H2B type 3-B;Histone H2B type 2-E;Histone H2B type 1-A	Hist1h2bj;Hist1h2bk;Hist1h2bm;Hist1h2br;LOC665622;Hist1h2bp;Hist1h2bc;Hist2h2bb;Hist1h2bh;Hist1h2bb;Hist1h2bf;Hist1h2ba;Hist3h2ba;Hist3h2bb;Hist2h2be	;;;;;;;;;;;;;;;;;;;;	21	4	4	4	2	2	3	2	4	3	3	3	2	2	2	3	2	4	3	3	3	2	2	2	3	2	4	3	3	3	2	34.1	34.1	34.1	13.579	123	123;126;126;134;135;126;126;126;126;126;126;126;126;138;127;126;126;126;127;120;120	0	10.048	By MS/MS	By matching	By MS/MS
P68372;Q9D6F9;Q9CVR0;Q9DCR1;Q9CRT0;Q3U9U3;Q3UMM1;Q922F4;Q9CUN8	P68372;Q9D6F9;Q9CVR0;Q9DCR1	13;10;9;8;6;6;6;6;5	13;10;9;8;6;6;6;6;5	3;2;2;0;0;0;0;0;0	Tubulin beta-4B chain;Tubulin beta-4A chain	Tubb4b;Tubb4a	;;;	9	13	13	3	2	4	6	2	9	9	8	3	4	2	4	6	2	9	9	8	3	4	1	0	2	0	1	2	2	1	1	45.6	45.6	12.1	49.83	445	445;444;291;299;235;375;447;447;211	0	107.26	By MS/MS	By MS/MS	By MS/MS
Q58E64;Q3UA81;P10126;Q3TII3;Q3UZQ3;D3YZ68;P62631;D3Z3I8;Q4FZE5	Q58E64;Q3UA81;P10126;Q3TII3;Q3UZQ3	11;11;11;10;10;5;5;4;3	11;11;11;10;10;5;5;4;3	11;11;11;10;10;5;5;4;3	Elongation factor 1-alpha;Elongation factor 1-alpha 1	Eef1a1	;;;;	9	11	11	11	3	4	7	3	5	8	8	3	3	3	4	7	3	5	8	8	3	3	3	4	7	3	5	8	8	3	3	31.4	31.4	31.4	50.113	462	462;462;462;462;462;249;463;186;108	0	91.696	By MS/MS	By MS/MS	By MS/MS
Q5SS40;P62259;Q8BPH1;D6REF3;F6WA09;Q3V453	Q5SS40;P62259;Q8BPH1;D6REF3;F6WA09	12;12;10;6;6;3	12;12;10;6;6;3	10;10;8;5;5;2	14-3-3 protein epsilon	Ywhae	;;;;	6	12	12	10	4	4	6	3	6	8	8	3	3	4	4	6	3	6	8	8	3	3	2	3	4	2	5	7	6	2	2	47.1	47.1	40	29.174	255	255;255;255;130;154;91	0	48.764	By MS/MS	By MS/MS	By MS/MS
D3YW52;Q61838	D3YW52;Q61838	4;4	3;3	3;3	Alpha-2-macroglobulin;Alpha-2-macroglobulin 165 kDa subunit;Alpha-2-macroglobulin 35 kDa subunit	Pzp;A2m	;	2	4	3	3	3	3	3	3	3	3	3	3	3	2	2	2	2	2	2	2	2	2	2	2	2	2	2	2	2	2	2	2.3	1.8	1.8	167.28	1507	1507;1495	0	6.1637	By MS/MS	By MS/MS	By MS/MS
P55095;A2AS86	P55095;A2AS86	7;6	7;6	7;6	Glucagon;Glicentin;Glicentin-related polypeptide;Oxyntomodulin;Glucagon;Glucagon-like peptide 1;Glucagon-like peptide 1(7-37);Glucagon-like peptide 1(7-36);Glucagon-like peptide 2	Gcg	;	2	7	7	7	5	0	5	3	5	6	4	3	2	5	0	5	3	5	6	4	3	2	5	0	5	3	5	6	4	3	2	47.2	47.2	47.2	20.906	180	180;173	0	267.68	By MS/MS		By MS/MS
Q3UZV3;Q547J8;Q3TYM6;Q3TT48;P21661	Q3UZV3;Q547J8;Q3TYM6;Q3TT48;P21661	9;9;9;9;9	9;9;9;9;9	9;9;9;9;9	Neuroendocrine convertase 2	Pcsk2	;;;;	5	9	9	9	5	0	5	4	8	6	5	3	3	5	0	5	4	8	6	5	3	3	5	0	5	4	8	6	5	3	3	22.6	22.6	22.6	68.911	619	619;637;637;736;637	0	97.286	By MS/MS		By MS/MS
Q03517;Q4W8U9	Q03517;Q4W8U9	17;16	17;16	17;16	Secretogranin-2;Secretoneurin;Manserin	Scg2	;	2	17	17	17	6	0	13	2	6	8	10	3	5	6	0	13	2	6	8	10	3	5	6	0	13	2	6	8	10	3	5	33.2	33.2	33.2	70.643	617	617;577	0	53.58	By MS/MS		By MS/MS
B2RTM0;P62806;Q61667;Q6B822	B2RTM0;P62806;Q61667	6;6;4;2	6;6;4;2	6;6;4;2	Histone H4	Hist2h4;Hist1h4a	;;	4	6	6	6	4	2	5	0	4	4	5	3	3	4	2	5	0	4	4	5	3	3	4	2	5	0	4	4	5	3	3	57.3	57.3	57.3	11.367	103	103;103;55;43	0	15.108	By MS/MS	By MS/MS	By MS/MS
B2MWM9;P14211;Q3UWP8;Q62041	B2MWM9;P14211;Q3UWP8	12;12;11;1	12;12;11;1	12;12;11;1	Calreticulin	Calr	;;	4	12	12	12	4	0	9	0	9	6	11	3	2	4	0	9	0	9	6	11	3	2	4	0	9	0	9	6	11	3	2	45.9	45.9	45.9	47.994	416	416;416;368;178	0	68.832	By MS/MS		By MS/MS
A5JUZ1;A0A0A6YW67;E9Q9J0;Q66JP1;Q8C2K3;Q642L7;E9Q4P0;E9Q5F6;Q922B0;E9QNP0;Q5SX22;Q3TH47;Q78XY9;Q6NZC5;Q8R0Z9;Q922Z8;Q8VC46;P62984;P62983;P0CG49;P0CG50;B0LAC2;J3QK04;D3YYZ2	A5JUZ1;A0A0A6YW67;E9Q9J0;Q66JP1;Q8C2K3;Q642L7;E9Q4P0;E9Q5F6;Q922B0;E9QNP0;Q5SX22;Q3TH47;Q78XY9;Q6NZC5;Q8R0Z9;Q922Z8;Q8VC46;P62984;P62983;P0CG49;P0CG50;B0LAC2;J3QK04	3;3;3;3;3;3;3;3;3;3;3;3;3;3;3;3;3;3;3;3;3;2;2;1	3;3;3;3;3;3;3;3;3;3;3;3;3;3;3;3;3;3;3;3;3;2;2;1	3;3;3;3;3;3;3;3;3;3;3;3;3;3;3;3;3;3;3;3;3;2;2;1	Ubiquitin-60S ribosomal protein L40;Ubiquitin;60S ribosomal protein L40;Ubiquitin-40S ribosomal protein S27a;Ubiquitin;40S ribosomal protein S27a;Polyubiquitin-B;Ubiquitin;Polyubiquitin-C;Ubiquitin;Ubiquitin-related 1;Ubiquitin-related 2	Ubc;Gm8797;Uba52;Gm1821;Rps27a;Kxd1;Ubb;Gm7808	;;;;;;;;;;;;;;;;;;;;;;	24	3	3	3	3	0	3	0	1	1	3	3	2	3	0	3	0	1	1	3	3	2	3	0	3	0	1	1	3	3	2	44.7	44.7	44.7	8.5647	76	76;77;96;128;153;156;193;201;202;232;236;278;305;305;354;582;658;128;156;305;734;71;128;122	0	12.128	By MS/MS		By MS/MS
B2RQH0;Q61495;Q7TSF1;Q7TSF0;Q9CUH7;Q7TSF0-2	B2RQH0;Q61495;Q7TSF1;Q7TSF0;Q9CUH7	4;4;4;3;2;1	4;4;4;3;2;1	4;4;4;3;2;1	Desmoglein-1-alpha;Desmoglein-1-beta;Desmoglein-1-gamma	Dsg1b;Dsg1a;Dsg1c	;;;;	6	4	4	4	0	0	3	0	0	0	4	3	1	0	0	3	0	0	0	4	3	1	0	0	3	0	0	0	4	3	1	3.7	3.7	3.7	114.45	1060	1060;1057;1060;911;353;427	0	4.6122			By MS/MS
Q54AH9;Q549D9;A8DV59;A8DV41;P02089;Q9QUN8;D0U293	Q54AH9;Q549D9;A8DV59;A8DV41;P02089;Q9QUN8;D0U293	7;7;7;7;7;6;6	3;3;3;3;3;2;2	3;3;3;3;3;2;2	Hemoglobin subunit beta-2	Hbb-b2;Hbbt2	;;;;;;	7	7	3	3	2	2	7	2	3	2	5	2	2	0	0	3	0	0	0	1	0	0	0	0	3	0	0	0	1	0	0	58.9	28.8	28.8	15.747	146	146;147;147;147;147;146;147	0	2.4712	By matching	By matching	By MS/MS
Q9JJ20;O70456	Q9JJ20;O70456	3;3	1;1	1;1	14-3-3 protein sigma	Sfn	;	2	3	1	1	2	1	3	1	1	1	3	2	2	0	0	1	0	0	0	1	1	1	0	0	1	0	0	0	1	1	1	10.5	3.2	3.2	27.833	248	248;248	0.008	1.1659	By matching	By matching	By MS/MS
A6BLY7	A6BLY7	3	1	1	Keratin, type I cytoskeletal 28	Krt28		1	3	1	1	2	2	3	2	2	2	3	2	2	1	1	1	1	1	1	1	1	1	1	1	1	1	1	1	1	1	1	5	1.9	1.9	50.346	462	462	0.0045662	1.8039	By MS/MS	By MS/MS	By MS/MS
Q9DCY1;P24369;Q6ZQM2	Q9DCY1;P24369	6;6;2	6;6;2	6;6;2	Peptidyl-prolyl cis-trans isomerase;Peptidyl-prolyl cis-trans isomerase B	Ppib	;	3	6	6	6	0	1	4	0	1	1	3	2	2	0	1	4	0	1	1	3	2	2	0	1	4	0	1	1	3	2	2	25	25	25	23.713	216	216;216;142	0	7.1663		By MS/MS	By MS/MS
B2RSN3;Q9CWF2;Q7TMM9;Q99J49;G3UZR1;Q62363;D5MR34	B2RSN3;Q9CWF2;Q7TMM9;Q99J49	11;11;11;8;2;1;1	1;1;1;1;0;0;0	1;1;1;1;0;0;0	Tubulin beta-2B chain;Tubulin beta-2A chain	Tubb2b;Tubb2a	;;;	7	11	1	1	1	4	4	2	8	8	7	2	3	0	0	0	0	0	1	1	0	1	0	0	0	0	0	1	1	0	1	36.9	3.4	3.4	49.953	445	445;445;445;298;67;100;133	0	3.9446	By matching	By matching	By matching
Q3TPE1;Q3TD35;Q3U017;Q2I0J8;Q2I0J7;E9QPU1;Q8CIZ8-2;Q8CIZ8	Q3TPE1;Q3TD35;Q3U017;Q2I0J8;Q2I0J7;E9QPU1;Q8CIZ8-2;Q8CIZ8	2;2;2;2;2;2;2;2	2;2;2;2;2;2;2;2	2;2;2;2;2;2;2;2	von Willebrand factor;von Willebrand antigen 2	Vwf	;;;;;;;	8	2	2	2	2	1	0	1	1	1	0	2	1	2	1	0	1	1	1	0	2	1	2	1	0	1	1	1	0	2	1	10.4	10.4	10.4	44.796	405	405;420;1126;2813;2813;2813;402;2813	0	3.7363	By MS/MS	By matching
Q3UUX9;Q3TIY6;Q3UC72;Q3UPA3;Q61598-2;Q61598;Q9CZ18	Q3UUX9;Q3TIY6;Q3UC72;Q3UPA3;Q61598-2;Q61598	9;9;9;9;9;9;3	5;5;5;5;5;5;1	5;5;5;5;5;5;1	Rab GDP dissociation inhibitor beta	Gdi2	;;;;;	7	9	5	5	1	0	5	0	5	2	7	2	2	1	0	3	0	2	1	4	2	2	1	0	3	0	2	1	4	2	2	25.4	12.6	12.6	50.507	445	445;445;509;512;409;445;230	0	9.5911	By matching		By matching
Q5M8R8;Q5FWB6;P14869;S4R1N1;E9Q070;D3YVM5;O89073	Q5M8R8;Q5FWB6;P14869;S4R1N1;E9Q070;D3YVM5	5;5;5;4;4;3;1	5;5;5;4;4;3;1	5;5;5;4;4;3;1	60S acidic ribosomal protein P0	Rplp0;Gm8730	;;;;;	7	5	5	5	0	0	1	0	3	5	3	2	1	0	0	1	0	3	5	3	2	1	0	0	1	0	3	5	3	2	1	21.5	21.5	21.5	34.216	317	317;317;317;221;317;145;131	0	9.2286			By matching
Q3TLL6;Q4FZL1;Q5F2A7;Q3UXC2;Q3TGK7;Q3TFG3;P60843;Q3TSJ4;Q78WR5;Q3U8I0;Q8BTU6;Q52KC1;P10630;P10630-2;E9Q561	Q3TLL6;Q4FZL1;Q5F2A7;Q3UXC2;Q3TGK7;Q3TFG3;P60843;Q3TSJ4;Q78WR5;Q3U8I0;Q8BTU6;Q52KC1;P10630;P10630-2;E9Q561	4;4;4;4;4;4;4;3;3;3;3;3;3;3;2	4;4;4;4;4;4;4;3;3;3;3;3;3;3;2	4;4;4;4;4;4;4;3;3;3;3;3;3;3;2	Eukaryotic initiation factor 4A-I;Eukaryotic initiation factor 4A-II;Eukaryotic initiation factor 4A-II, N-terminally processed	Eif4a1;Eif4a2	;;;;;;;;;;;;;;	15	4	4	4	1	0	2	0	1	1	4	2	2	1	0	2	0	1	1	4	2	2	1	0	2	0	1	1	4	2	2	14.3	14.3	14.3	41.49	364	364;405;406;406;406;406;406;225;236;286;362;407;407;408;312	0	9.3588	By matching		By MS/MS
A2A5N2;Q9CQV8-2;Q9CQV8;A2A5N1	A2A5N2;Q9CQV8-2;Q9CQV8;A2A5N1	4;4;4;2	1;1;1;1	1;1;1;1	14-3-3 protein beta/alpha;14-3-3 protein beta/alpha, N-terminally processed	Ywhab	;;;	4	4	1	1	3	2	3	1	3	3	3	2	2	0	0	0	0	1	1	0	0	0	0	0	0	0	1	1	0	0	0	16.7	5.7	5.7	28.086	246	246;244;246;159	0	23.258	By matching	By matching	By matching
A3KML3;F6YY69;F6VW30;P68254-2;P68254	A3KML3;F6YY69;F6VW30;P68254-2;P68254	7;7;7;7;7	4;4;4;4;4	4;4;4;4;4	14-3-3 protein theta	Ywhaq	;;;;	5	7	4	4	3	3	3	1	3	5	6	2	2	0	1	0	0	1	3	3	0	0	0	1	0	0	1	3	3	0	0	36.3	25.3	25.3	27.778	245	245;285;303;243;245	0	55.688	By matching	By matching	By matching
Q3TED3;Q3V117;Q91V92;Q3UEA1;Q8VDM8;Q3UVY4;Q3TS02;Q99K05;Q6P063	Q3TED3;Q3V117;Q91V92;Q3UEA1;Q8VDM8	33;33;33;30;19;12;12;7;3	33;33;33;30;19;12;12;7;3	33;33;33;30;19;12;12;7;3	ATP-citrate synthase	Acly	;;;;	9	33	33	33	6	3	7	1	24	25	19	2	2	6	3	7	1	24	25	19	2	2	6	3	7	1	24	25	19	2	2	40.1	40.1	40.1	119.62	1091	1091;1101;1091;1034;592;436;491;195;117	0	126.78	By MS/MS	By matching	By matching
P99024;Q80ZV2	P99024	13;5	4;1	3;1	Tubulin beta-5 chain	Tubb5		2	13	4	3	1	5	5	4	9	9	7	2	2	0	1	2	2	2	3	2	0	0	0	1	1	2	1	2	1	0	0	45.7	15.5	12.2	49.67	444	444;186	0	4.6421	By matching	By matching	By MS/MS
Q53ZU7;O08709;Q6GT24;D3Z0Y2;Q6A0D0;Q8BPD3;Q8BG37;A0A0A6YXQ7	Q53ZU7;O08709;Q6GT24;D3Z0Y2;Q6A0D0;Q8BPD3	8;8;7;6;6;5;2;1	8;8;7;6;6;5;2;1	8;8;7;6;6;5;2;1	Peroxiredoxin-6	Prdx6	;;;;;	8	8	8	8	3	1	4	1	4	3	4	2	2	3	1	4	1	4	3	4	2	2	3	1	4	1	4	3	4	2	2	47.3	47.3	47.3	24.87	224	224;224;224;200;227;178;224;76	0	37.972	By matching	By matching	By MS/MS
Q5NC82;E9PZF0;Q01768;B0LAA8;Q8R4B4;Q5NC80;Q5NC79	Q5NC82;E9PZF0;Q01768;B0LAA8;Q8R4B4	9;9;9;8;6;4;2	9;9;9;8;6;4;2	5;5;5;4;2;0;0	Nucleoside diphosphate kinase;Nucleoside diphosphate kinase B	Nme2;Gm20390	;;;;	7	9	9	5	2	2	5	1	6	5	6	2	2	2	2	5	1	6	5	6	2	2	1	1	1	0	3	2	2	0	0	74.3	74.3	44.1	17.363	152	152;267;152;144;365;127;117	0	35.129	By matching	By matching	By MS/MS
Q8C153;Q3UZ14;Q3UMI7;Q3UDC8;Q3TX47;Q3TWX1;Q3TLB1;Q3TJZ1;P58252;Q6P9L9;Q8BMA8;Q3TW58;Q3UBL9;Q3TK17;Q3TSK4;Q3TPG2;Q99LT6;Q61509;O89070;O89069	Q8C153;Q3UZ14;Q3UMI7;Q3UDC8;Q3TX47;Q3TWX1;Q3TLB1;Q3TJZ1;P58252;Q6P9L9;Q8BMA8;Q3TW58;Q3UBL9;Q3TK17;Q3TSK4;Q3TPG2;Q99LT6	17;17;17;17;17;17;17;17;17;16;16;16;16;16;12;11;9;8;1;1	17;17;17;17;17;17;17;17;17;16;16;16;16;16;12;11;9;8;1;1	17;17;17;17;17;17;17;17;17;16;16;16;16;16;12;11;9;8;1;1	Elongation factor 2	Eef2	;;;;;;;;;;;;;;;;	20	17	17	17	3	2	5	1	8	11	10	2	1	3	2	5	1	8	11	10	2	1	3	2	5	1	8	11	10	2	1	26	26	26	95.257	858	858;858;858;858;858;858;858;858;858;843;858;858;858;858;418;367;287;268;109;259	0	33.316	By MS/MS	By matching	By MS/MS
Q3THH1;Q922R8;Q3TML0;Q3TJL8;Q9DAB4	Q3THH1;Q922R8;Q3TML0;Q3TJL8;Q9DAB4	7;7;6;6;5	7;7;6;6;5	7;7;6;6;5	Protein disulfide-isomerase A6	Pdia6	;;;;	5	7	7	7	2	1	6	1	6	6	6	2	3	2	1	6	1	6	6	6	2	3	2	1	6	1	6	6	6	2	3	22.2	22.2	22.2	48.657	445	445;440;445;445;391	0	58.138	By MS/MS	By matching	By MS/MS
E9Q704;F8VQA4;P97467;Q8BQ31;Q3V1A8;F6TGI4;F6T0D3;F7D4K4;A1L331	E9Q704;F8VQA4;P97467;Q8BQ31;Q3V1A8	13;13;13;7;7;2;1;1;1	13;13;13;7;7;2;1;1;1	13;13;13;7;7;2;1;1;1	Peptidyl-glycine alpha-amidating monooxygenase;Peptidylglycine alpha-hydroxylating monooxygenase;Peptidyl-alpha-hydroxyglycine alpha-amidating lyase	Pam	;;;;	9	13	13	13	8	0	11	1	3	1	7	2	0	8	0	11	1	3	1	7	2	0	8	0	11	1	3	1	7	2	0	17.9	17.9	17.9	97.175	873	873;978;979;367;519;150;169;189;215	0	25.726	By MS/MS		By MS/MS
Q04857;B0LAD9;Q99LW4;Q8C6Y0	Q04857;B0LAD9;Q99LW4	3;2;2;1	3;2;2;1	3;2;2;1	Collagen alpha-1(VI) chain	Col6a1	;;	4	3	3	3	2	1	1	1	2	2	1	2	2	2	1	1	1	2	2	1	2	2	2	1	1	1	2	2	1	2	2	3.5	3.5	3.5	108.49	1025	1025;165;406;266	0	9.6509	By MS/MS	By MS/MS	By matching
Q545I7;P01325	Q545I7;P01325	5;5	4;4	4;4	Insulin-1;Insulin-1 B chain;Insulin-1 A chain	Ins1	;	2	5	4	4	3	1	2	2	4	3	3	2	2	2	1	1	2	4	2	2	1	1	2	1	1	2	4	2	2	1	1	70.4	50.9	50.9	12.16	108	108;108	0	41.497	By MS/MS	By matching	By MS/MS
Q3TT51;P12961	Q3TT51;P12961	4;4	4;4	4;4	Neuroendocrine protein 7B2;N-terminal peptide;C-terminal peptide	Scg5	;	2	4	4	4	3	1	4	1	3	3	3	2	1	3	1	4	1	3	3	3	2	1	3	1	4	1	3	3	3	2	1	30.7	30.7	30.7	23.866	212	212;212	0	46.933	By MS/MS	By matching	By MS/MS
P17751;H7BXC3	P17751;H7BXC3	9;8	9;8	9;8	Triosephosphate isomerase	Tpi1	;	2	9	9	9	2	3	7	2	5	4	7	2	4	2	3	7	2	5	4	7	2	4	2	3	7	2	5	4	7	2	4	36.8	36.8	36.8	32.191	299	299;167	0	26.035	By MS/MS	By MS/MS	By MS/MS
P16125;Q5M8R7;D3Z7F0;A0A0N4SVV8;D3YVR7;D3YZE4;Q64483;Q548Z6;P00342	P16125;Q5M8R7;D3Z7F0	6;3;3;2;1;1;1;1;1	6;3;3;2;1;1;1;1;1	5;3;2;1;0;0;0;0;0	L-lactate dehydrogenase B chain;L-lactate dehydrogenase	Ldhb	;;	9	6	6	5	1	3	2	3	3	4	1	2	1	1	3	2	3	3	4	1	2	1	1	3	1	3	3	3	0	1	0	22.5	22.5	18.9	36.572	334	334;101;198;193;235;237;332;332;332	0	11.82	By MS/MS	By MS/MS	By MS/MS
F6W4D3;D3YY36;Q8VC96;Q9DBD0	F6W4D3;D3YY36;Q8VC96;Q9DBD0	2;2;2;2	1;1;1;1	1;1;1;1	Inhibitor of carbonic anhydrase	1300017J02Rik;Ica	;;;	4	2	1	1	2	2	1	1	2	2	1	2	1	1	1	1	1	1	1	1	1	1	1	1	1	1	1	1	1	1	1	9.9	5.4	5.4	26.65	242	242;622;700;700	0	13.41	By MS/MS	By MS/MS	By MS/MS
Q5FWB7;A6ZI44;P05064;Q6NY00;D3YWI1;Q9CPQ9;A6ZI46;A0A0U1RPN8;D3YV98;A0A0U1RPT5;D3Z510;A6ZI47;P05063;Q3UER1;Q3TJ66;Q91Y97	Q5FWB7;A6ZI44;P05064;Q6NY00;D3YWI1;Q9CPQ9;A6ZI46;A0A0U1RPN8	14;14;14;11;10;9;9;7;6;6;5;4;3;1;1;1	14;14;14;11;10;9;9;7;6;6;5;4;3;1;1;1	14;14;14;11;10;9;9;7;6;6;5;4;3;1;1;1	Fructose-bisphosphate aldolase;Fructose-bisphosphate aldolase A	Aldoa;Aldoart1	;;;;;;;	16	14	14	14	0	2	7	1	8	10	10	2	4	0	2	7	1	8	10	10	2	4	0	2	7	1	8	10	10	2	4	52.5	52.5	52.5	39.355	364	364;418;364;364;237;364;419;190;193;209;131;364;363;364;364;364	0	69.068		By MS/MS	By MS/MS
H7BWY6;Q00724;Q3TF08	H7BWY6;Q00724;Q3TF08	2;2;1	2;2;1	2;2;1	Retinol-binding protein 4	Rbp4	;;	3	2	2	2	1	1	0	1	1	1	1	2	1	1	1	0	1	1	1	1	2	1	1	1	0	1	1	1	1	2	1	11.8	11.8	11.8	28.405	245	245;201;174	0	4.4824	By MS/MS	By matching
E9Q1Y3;E9Q414	E9Q1Y3;E9Q414	5;5	3;3	3;3	Apolipoprotein B-100;Apolipoprotein B-48	Apob	;	2	5	3	3	2	5	0	4	5	5	2	2	2	1	3	0	2	3	3	2	1	1	1	3	0	2	3	3	2	1	1	1.1	0.7	0.7	503.9	4456	4456;4505	0	10.668	By MS/MS	By MS/MS
B9EKB8;B7ZWC4;Q07113;Q8K0J1;Q8C2F9	B9EKB8;B7ZWC4;Q07113	3;3;3;1;1	3;3;3;1;1	3;3;3;1;1	Cation-independent mannose-6-phosphate receptor	Igf2r	;;	5	3	3	3	1	2	0	3	2	1	0	2	1	1	2	0	3	2	1	0	2	1	1	2	0	3	2	1	0	2	1	1.7	1.7	1.7	273.81	2483	2483;2483;2483;876;1282	0	19.976	By MS/MS	By MS/MS
B7ZNJ1;Q3UH17;A0A087WS56;B9EHT6;A0A087WSN6;Q3UHL6;Q3UGY5;A0A087WR50;P11276;Q3TBB4;Q3TCF1;Q3TCL7;Q3UHR1;Q4KL80;Q8R3F3;Q3UZF9;A0A087WS99;Q99KD0	B7ZNJ1;Q3UH17;A0A087WS56;B9EHT6;A0A087WSN6;Q3UHL6;Q3UGY5;A0A087WR50;P11276;Q3TBB4;Q3TCF1;Q3TCL7;Q3UHR1	8;8;8;8;8;8;8;8;8;7;7;6;6;2;2;2;1;1	8;8;8;8;8;8;8;8;8;7;7;6;6;2;2;2;1;1	8;8;8;8;8;8;8;8;8;7;7;6;6;2;2;2;1;1	Fibronectin;Anastellin	Fn1	;;;;;;;;;;;;	18	8	8	8	0	3	0	5	4	5	0	2	1	0	3	0	5	4	5	0	2	1	0	3	0	5	4	5	0	2	1	5.8	5.8	5.8	239.72	2176	2176;2266;2266;2271;2296;2361;2386;2386;2477;1832;2296;1331;1920;383;810;1055;200;216	0	53.93		By MS/MS
P14152;B1ATQ3	P14152	10;2	10;2	10;2	Malate dehydrogenase, cytoplasmic	Mdh1		2	10	10	10	1	0	7	0	7	6	9	2	4	1	0	7	0	7	6	9	2	4	1	0	7	0	7	6	9	2	4	29.9	29.9	29.9	36.511	334	334;156	0	19.896	By matching		By MS/MS
P62204;Q3UKW2;Q9D6P8;G3UX57	P62204;Q3UKW2;Q9D6P8	7;6;4;1	7;6;4;1	7;6;4;1	Calmodulin;Calmodulin-like protein 3	Calm1;Calml3	;;	4	7	7	7	1	0	3	0	4	6	5	2	3	1	0	3	0	4	6	5	2	3	1	0	3	0	4	6	5	2	3	50.3	50.3	50.3	16.837	149	149;197;149;39	0	53.836	By matching		By MS/MS
P28481-2;P28481-7;P28481-6;P28481-5;P28481-4;P28481-1;P28481	P28481-2;P28481-7;P28481-6;P28481-5;P28481-4;P28481-1;P28481	4;4;4;4;4;4;4	4;4;4;4;4;4;4	4;4;4;4;4;4;4	Collagen alpha-1(II) chain;Collagen alpha-1(II) chain;Chondrocalcin	Col2a1	;;;;;;	7	4	4	4	0	0	0	0	1	2	0	2	2	0	0	0	0	1	2	0	2	2	0	0	0	0	1	2	0	2	2	3.1	3.1	3.1	131.86	1390	1390;1419;1441;1441;1458;1458;1487	0	11.334
Q8R016;E9PY26	Q8R016;E9PY26	2;1	2;1	2;1	Bleomycin hydrolase	Blmh	;	2	2	2	2	1	0	2	0	0	0	1	2	1	1	0	2	0	0	0	1	2	1	1	0	2	0	0	0	1	2	1	5.3	5.3	5.3	52.511	455	455;179	0	8.9551	By matching		By MS/MS
Q80U29;Q3TAJ6;B1AR52;F7DC70;B1AR51;P58854	Q80U29;Q3TAJ6;B1AR52;F7DC70;B1AR51;P58854	2;1;1;1;1;1	2;1;1;1;1;1	2;1;1;1;1;1	Gamma-tubulin complex component 3	mKIAA0357;Tubgcp3;Dnahc9;Dnah9	;;;;;	6	2	2	2	1	0	2	0	0	0	2	2	1	1	0	2	0	0	0	2	2	1	1	0	2	0	0	0	2	2	1	1	1	1	169.04	1471	1471;905;1957;1958;4484;905	1	-2	By matching		By MS/MS
Q545J0;Q08731;A0A0N4SVN9	Q545J0;Q08731	4;4;1	4;4;1	4;4;1	Lithostathine-2	Reg2	;	3	4	4	4	0	0	4	0	0	0	2	2	1	0	0	4	0	0	0	2	2	1	0	0	4	0	0	0	2	2	1	26	26	26	19.407	173	173;173;132	0.0066372	1.5151			By MS/MS
Q9CY10;Q91VB8;Q8BPF4;A8DUV3;P01942;Q9QWJ3;Q9CY06;Q9CWS5;Q61287;A8DUV1;Q61649;Q78PA4;A7M7S6;P06467	Q9CY10;Q91VB8;Q8BPF4;A8DUV3;P01942;Q9QWJ3;Q9CY06;Q9CWS5;Q61287;A8DUV1;Q61649	6;6;6;6;6;5;5;5;5;5;3;1;1;1	4;4;4;4;4;3;3;3;3;3;3;0;0;0	4;4;4;4;4;3;3;3;3;3;3;0;0;0	Hemoglobin subunit alpha	haemaglobin alpha 2;Hbat1;Hba	;;;;;;;;;;	14	6	4	4	2	3	5	2	2	2	3	1	2	1	1	4	0	0	1	2	0	1	1	1	4	0	0	1	2	0	1	43	36.6	36.6	15.202	142	142;142;142;142;142;122;142;142;142;142;58;142;156;142	0	10.476	By MS/MS	By matching	By MS/MS
Q3UEK0;Q9Z0K8	Q3UEK0;Q9Z0K8	1;1	1;1	1;1	Pantetheinase	Vnn1	;	2	1	1	1	1	1	1	1	1	1	1	1	1	1	1	1	1	1	1	1	1	1	1	1	1	1	1	1	1	1	1	4	4	4	36.775	328	328;512	0	26.693	By MS/MS	By matching	By MS/MS
Q546G4;P07724;K7R066	Q546G4;P07724;K7R066	4;4;2	2;2;1	2;2;1	Serum albumin	Alb	;;	3	4	2	2	2	2	2	2	2	2	2	1	3	1	1	0	1	1	1	1	0	2	1	1	0	1	1	1	1	0	2	7.4	3.6	3.6	68.692	608	608;608;171	0	2.4905	By matching	By matching	By matching
D3Z6E4;Q922A0;Q545V3;Q3UJ20;P17183;D3YVD3;D3Z2S4;A0A0N4SUX5;A0A0N4SUI6;B1ARR6;A0A0N4SUW8;Q5SX61;Q5SX60;Q5SX59;Q4FK59;P21550	D3Z6E4;Q922A0;Q545V3;Q3UJ20;P17183;D3YVD3;D3Z2S4;A0A0N4SUX5;A0A0N4SUI6;B1ARR6	4;4;4;4;4;3;3;3;2;2;1;1;1;1;1;1	2;2;2;2;2;1;1;1;0;0;0;0;0;0;0;0	2;2;2;2;2;1;1;1;0;0;0;0;0;0;0;0	Enolase;Gamma-enolase	Eno2;Eno1	;;;;;;;;;	16	4	2	2	1	1	3	1	2	2	3	1	0	0	0	1	0	1	1	1	0	0	0	0	1	0	1	1	1	0	0	20.3	10.5	10.5	34.804	315	315;338;434;434;434;122;162;391;58;67;37;70;80;196;434;434	0.0023256	1.9265	By matching	By matching	By matching
Q3V206	Q3V206	1	1	1		Ptrh1		1	1	1	1	1	1	1	1	1	1	0	1	1	1	1	1	1	1	1	0	1	1	1	1	1	1	1	1	0	1	1	7.2	7.2	7.2	22.047	209	209	0.0098232	1.0891	By matching	By matching	By matching
A0A0J9YUH8	A0A0J9YUH8	1	1	1				1	1	1	1	1	1	1	1	1	1	1	1	1	1	1	1	1	1	1	1	1	1	1	1	1	1	1	1	1	1	1	11	11	11	8.8338	73	73	0.0099206	1.1334	By MS/MS	By MS/MS	By MS/MS
A0A0A6YWU2;E9Q589;A0A0A6YY47;E9QB01;P13595-4;P13595-3;P13595-2;P13595;A0A0A6YY91	A0A0A6YWU2;E9Q589;A0A0A6YY47;E9QB01;P13595-4;P13595-3;P13595-2;P13595;A0A0A6YY91	3;3;3;3;3;3;3;3;2	3;3;3;3;3;3;3;3;2	3;3;3;3;3;3;3;3;2	Neural cell adhesion molecule 1	Ncam1	;;;;;;;;	9	3	3	3	1	1	0	1	2	1	0	1	2	1	1	0	1	2	1	0	1	2	1	1	0	1	2	1	0	1	2	7.3	7.3	7.3	67.305	605	605;725;848;849;605;725;848;1115;1089	0	5.6582	By MS/MS	By MS/MS
Q5F209;Q5QNQ6	Q5F209;Q5QNQ6	1;1	1;1	1;1	Oxysterol-binding protein 2	Osbp2	;	2	1	1	1	0	1	0	1	1	1	0	1	0	0	1	0	1	1	1	0	1	0	0	1	0	1	1	1	0	1	0	11.6	11.6	11.6	17.521	155	155;908	0.0045045	1.6797		By MS/MS
D6RI51;Q9JLT2	D6RI51;Q9JLT2	1;1	1;1	1;1	Trehalase	Treh	;	2	1	1	1	1	1	1	0	1	1	1	1	1	1	1	1	0	1	1	1	1	1	1	1	1	0	1	1	1	1	1	4.7	4.7	4.7	17.255	150	150;576	0.006263	1.2734	By MS/MS	By matching	By MS/MS
A0A0R4J2A0;Q5SW75;Q5SW75-2;Q5SW75-4	A0A0R4J2A0;Q5SW75;Q5SW75-2;Q5SW75-4	1;1;1;1	1;1;1;1	1;1;1;1	Protein phosphatase Slingshot homolog 2	Ssh2	;;;	4	1	1	1	0	0	0	0	1	1	0	1	0	0	0	0	0	1	1	0	1	0	0	0	0	0	1	1	0	1	0	0.8	0.8	0.8	158.81	1429	1429;1423;1430;1450	1	-2
Q8BUY8	Q8BUY8	1	1	1	G-protein coupled receptor-associated sorting protein 2	Gprasp2		1	1	1	1	1	0	1	0	0	1	1	1	1	1	0	1	0	0	1	1	1	1	1	0	1	0	0	1	1	1	1	1.9	1.9	1.9	92.801	826	826	0.006135	1.2271	By MS/MS		By MS/MS
A8IP69;P61982	A8IP69;P61982	4;4	2;2	2;2	14-3-3 protein gamma;14-3-3 protein gamma, N-terminally processed	Ywhag	;	2	4	2	2	3	1	2	1	1	3	3	1	1	1	0	0	0	0	2	1	0	0	1	0	0	0	0	2	1	0	0	20.6	13.4	13.4	28.302	247	247;247	0	17.536	By MS/MS	By matching	By matching
Q642I5;Q9DBB9	Q642I5;Q9DBB9	1;1	1;1	1;1	Carboxypeptidase N subunit 2	Cpn2	;	2	1	1	1	1	1	1	1	1	1	1	1	1	1	1	1	1	1	1	1	1	1	1	1	1	1	1	1	1	1	1	1.9	1.9	1.9	45.709	413	413;547	0.0097656	1.0675	By MS/MS	By matching	By MS/MS
A0A087WP24;A0A087WRJ2;A0A087WPF8;A0A087WQN8;A0A087WSR2;E9QN99;Q8VCR7	A0A087WP24;A0A087WRJ2;A0A087WPF8;A0A087WQN8;A0A087WSR2;E9QN99;Q8VCR7	1;1;1;1;1;1;1	1;1;1;1;1;1;1	1;1;1;1;1;1;1	Alpha/beta hydrolase domain-containing protein 14B	Abhd14b	;;;;;;	7	1	1	1	1	1	0	1	1	1	1	1	0	1	1	0	1	1	1	1	1	0	1	1	0	1	1	1	1	1	0	7.7	7.7	7.7	14.948	142	142;151;174;183;194;210;210	0.0064378	1.3555	By matching	By matching
Q99PT1	Q99PT1	4	4	4	Rho GDP-dissociation inhibitor 1	Arhgdia		1	4	4	4	0	1	2	1	1	1	3	1	1	0	1	2	1	1	1	3	1	1	0	1	2	1	1	1	3	1	1	41.2	41.2	41.2	23.407	204	204	0	38.973		By matching	By MS/MS
P12960	P12960	3	3	3	Contactin-1	Cntn1		1	3	3	3	2	2	0	1	2	1	1	1	1	2	2	0	1	2	1	1	1	1	2	2	0	1	2	1	1	1	1	4.2	4.2	4.2	113.39	1020	1020	0	6.0493	By matching	By MS/MS
Q8CG46-2;Q8CG46	Q8CG46-2;Q8CG46	1;1	1;1	1;1	Structural maintenance of chromosomes protein 5	Smc5	;	2	1	1	1	1	1	1	0	1	1	1	1	1	1	1	1	0	1	1	1	1	1	1	1	1	0	1	1	1	1	1	1	1	1	127.38	1087	1087;1101	1	-2	By matching	By matching	By matching
P52480-2	P52480-2	17	1	1	Pyruvate kinase PKM	Pkm		1	17	1	1	5	0	11	0	9	11	14	1	1	0	0	0	0	0	1	0	0	0	0	0	0	0	0	1	0	0	0	40.5	1.5	1.5	57.984	531	531	0.00611	1.2106	By matching		By matching
P99027	P99027	3	3	3	60S acidic ribosomal protein P2	Rplp2		1	3	3	3	0	0	3	0	1	1	3	1	1	0	0	3	0	1	1	3	1	1	0	0	3	0	1	1	3	1	1	50.4	50.4	50.4	11.651	115	115	0	12.284			By MS/MS
P68510	P68510	3	1	1	14-3-3 protein eta	Ywhah		1	3	1	1	2	1	2	1	2	2	2	1	1	0	0	0	0	1	1	0	0	0	0	0	0	0	1	1	0	0	0	13.4	6.1	6.1	28.211	246	246	0	2.1308	By matching	By matching	By matching
S4R2B5;Q6R6I7	S4R2B5;Q6R6I7	1;1	1;1	1;1	Relaxin receptor 1	Rxfp1	;	2	1	1	1	1	1	1	1	1	1	1	1	1	1	1	1	1	1	1	1	1	1	1	1	1	1	1	1	1	1	1	13.7	13.7	13.7	11.191	102	102;758	0.0096154	1.0389	By MS/MS	By matching	By matching
A0A0U1RQ57	A0A0U1RQ57	1	1	1				1	1	1	1	0	1	1	1	1	1	1	1	1	0	1	1	1	1	1	1	1	1	0	1	1	1	1	1	1	1	1	6.6	6.6	6.6	25.283	226	226	1	-2		By matching	By matching
A6H6Q4	A6H6Q4	1	1	1	Uncharacterized protein C19orf71 homolog			1	1	1	1	1	1	1	1	1	1	1	1	1	1	1	1	1	1	1	1	1	1	1	1	1	1	1	1	1	1	1	4.4	4.4	4.4	23.954	206	206	1	-2	By MS/MS	By MS/MS	By matching
P09411;S4R2M7;P09041	P09411	11;5;2	11;5;2	11;5;2	Phosphoglycerate kinase 1	Pgk1		3	11	11	11	3	1	6	1	3	4	10	1	1	3	1	6	1	3	4	10	1	1	3	1	6	1	3	4	10	1	1	31.7	31.7	31.7	44.55	417	417;255;417	0	15.477	By matching	By matching	By MS/MS
P48036;A0A0G2JGQ0	P48036	13;5	13;5	13;5	Annexin A5	Anxa5		2	13	13	13	6	0	7	1	7	6	9	1	1	6	0	7	1	7	6	9	1	1	6	0	7	1	7	6	9	1	1	43.9	43.9	43.9	35.752	319	319;137	0	62.56	By MS/MS		By MS/MS
Q5EBQ2;Q3TGC5;P70296;D3Z1V4;D6RHS6	Q5EBQ2;Q3TGC5;P70296;D3Z1V4;D6RHS6	6;6;6;5;3	6;6;6;5;3	6;6;6;5;3	Phosphatidylethanolamine-binding protein 1;Hippocampal cholinergic neurostimulating peptide	Pebp1	;;;;	5	6	6	6	2	0	4	1	5	5	5	1	1	2	0	4	1	5	5	5	1	1	2	0	4	1	5	5	5	1	1	57.8	57.8	57.8	20.83	187	187;187;187;209;136	0	34.229	By MS/MS		By MS/MS
A2A5K2;Q4FJT5;Q3UFS5;P55065	A2A5K2;Q4FJT5;Q3UFS5;P55065	1;1;1;1	1;1;1;1	1;1;1;1	Phospholipid transfer protein	Pltp	;;;	4	1	1	1	1	1	0	1	1	1	0	1	0	1	1	0	1	1	1	0	1	0	1	1	0	1	1	1	0	1	0	3.2	3.2	3.2	49.022	441	441;493;493;493	0	4.8226	By MS/MS	By MS/MS
Q3V1L5;Q7M739;F6ZDS4	Q3V1L5;Q7M739;F6ZDS4	1;1;1	1;1;1	1;1;1	Nucleoprotein TPR	Tpr	;;	3	1	1	1	0	1	0	1	1	1	0	1	0	0	1	0	1	1	1	0	1	0	0	1	0	1	1	1	0	1	0	1.1	1.1	1.1	144.43	1244	1244;2357;2431	0.0063694	1.3113		By MS/MS
Q80Y52;Q3UIF3;Q3TKA2;P07901;Q3TJU7;A0PJ91;Q3TKB9;Q8C5U3;Q3TKG0;Q8C2A9;B7ZC50;A2A6A2;B7ZC49	Q80Y52;Q3UIF3;Q3TKA2;P07901;Q3TJU7;A0PJ91;Q3TKB9;Q8C5U3;Q3TKG0	14;14;14;14;12;12;11;11;11;4;3;1;1	9;9;9;9;9;7;7;7;7;1;0;0;0	9;9;9;9;9;7;7;7;7;1;0;0;0	Heat shock protein HSP 90-alpha	Hsp90aa1	;;;;;;;;	13	14	9	9	3	5	7	4	8	8	9	1	2	1	3	3	2	5	5	5	0	0	1	3	3	2	5	5	5	0	0	23.1	15.3	15.3	84.787	733	733;733;733;733;556;565;556;557;557;274;201;98;103	0	70.79	By matching	By MS/MS	By matching
G3UY13;Q3UEL3;E9Q6I2;Q3V2X3;Q3UVZ1;Q61730-2;Q61730;Q61730-3	G3UY13;Q3UEL3;E9Q6I2;Q3V2X3;Q3UVZ1;Q61730-2;Q61730;Q61730-3	2;2;2;2;2;2;2;2	2;2;2;2;2;2;2;2	2;2;2;2;2;2;2;2	Interleukin-1 receptor accessory protein	Il1rap	;;;;;;;	8	2	2	2	1	2	1	1	1	1	1	1	1	1	2	1	1	1	1	1	1	1	1	2	1	1	1	1	1	1	1	5.5	5.5	5.5	39.881	346	346;360;640;685;685;360;570;685	0	2.238	By MS/MS	By MS/MS	By matching
G3UYM8;Q80U26;F6VR53;D3YUF3;D3YUF4;G3UXP9;E9Q863;Q003U3;E9PY13;E9PY12;Q3UHQ9;G3UX72;E9PXE1;E9QPM7;Q6PDM6;E9PXE2;Q64096;Q8C7Z1	G3UYM8;Q80U26;F6VR53;D3YUF3;D3YUF4;G3UXP9;E9Q863;Q003U3;E9PY13;E9PY12;Q3UHQ9;G3UX72;E9PXE1;E9QPM7;Q6PDM6;E9PXE2;Q64096;Q8C7Z1	2;2;2;2;2;2;2;2;2;2;2;2;2;2;2;2;2;1	2;2;2;2;2;2;2;2;2;2;2;2;2;2;2;2;2;1	2;2;2;2;2;2;2;2;2;2;2;2;2;2;2;2;2;1	Guanine nucleotide exchange factor DBS	Mcf2l	;;;;;;;;;;;;;;;;;	18	2	2	2	0	2	1	1	2	2	0	1	1	0	2	1	1	2	2	0	1	1	0	2	1	1	2	2	0	1	1	3	3	3	86.56	757	757;806;807;866;1046;1059;1067;1097;1097;1101;1118;1118;1125;1149;1166;1175;1149;477	0	3.5807		By MS/MS	By matching
Q71LX8;P11499;Q80YC2;Q811H6;E9Q3D6;D3Z1R1;E9PX27;E9Q0C3	Q71LX8;P11499	15;15;5;5;4;3;3;2	13;13;5;5;4;1;1;2	8;8;3;3;3;0;0;2	Heat shock protein HSP 90-beta	Hsp90ab1	;	8	15	13	8	4	3	11	3	9	8	12	1	5	4	3	10	3	7	7	11	1	4	2	1	6	1	4	4	7	0	2	25.8	23.9	16	83.28	724	724;724;363;378;189;76;112;161	0	60.107	By MS/MS	By matching	By MS/MS
F8WIX8;A0A0N4SV66;A0AUV1;A3KPD0;Q8CGP4;Q149V4;B2RWH3;B2RVF0;A2AB79;Q8CGP6;Q8R1M2;Q64523;Q8CGP7;Q8CGP5;Q8BFU2;Q6GSS7;P22752;B2RVP5;Q3THW5;P0C0S6;P27661;Q61668;G3UWL7;Q8R029;Q3TFU6;Q3UA95;Q64522	F8WIX8;A0A0N4SV66;A0AUV1;A3KPD0;Q8CGP4;Q149V4;B2RWH3;B2RVF0;A2AB79;Q8CGP6;Q8R1M2;Q64523;Q8CGP7;Q8CGP5;Q8BFU2;Q6GSS7;P22752;B2RVP5;Q3THW5;P0C0S6;P27661	3;3;3;3;3;3;3;3;3;3;3;3;3;3;3;3;3;2;2;2;2;1;1;1;1;1;1	3;3;3;3;3;3;3;3;3;3;3;3;3;3;3;3;3;2;2;2;2;1;1;1;1;1;1	3;3;3;3;3;3;3;3;3;3;3;3;3;3;3;3;3;2;2;2;2;1;1;1;1;1;1	Histone H2A;Histone H2A type 1-H;Histone H2A.J;Histone H2A type 2-C;Histone H2A type 1-K;Histone H2A type 1-F;Histone H2A type 3;Histone H2A type 2-A;Histone H2A type 1;Histone H2A.V;Histone H2A.Z;Histone H2AX	Hist1h2al;Hist1h2ah;Hist1h2aa;Hist2h2ac;Hist2h2aa1;Hist1h2ad;Hist3h2a;H2afj;Hist1h2ak;Hist1h2af;Hist1h2ab;H2afv;H2afz;H2afx	;;;;;;;;;;;;;;;;;;;;	27	3	3	3	2	1	3	1	2	1	2	1	1	2	1	3	1	2	1	2	1	1	2	1	3	1	2	1	2	1	1	28	28	28	13.607	125	125;126;127;128;129;129;130;130;130;128;129;129;130;130;130;130;130;128;128;128;143;37;87;90;90;105;130	0	6.2244	By MS/MS	By matching	By MS/MS
Q2T9H5;Q9QZ25	Q2T9H5;Q9QZ25	1;1	1;1	1;1	Vascular non-inflammatory molecule 3	Vnn3	;	2	1	1	1	1	1	1	1	1	1	1	1	1	1	1	1	1	1	1	1	1	1	1	1	1	1	1	1	1	1	1	2.4	2.4	2.4	56.229	500	500;500	0	4.3077	By MS/MS	By MS/MS	By MS/MS
Q5EEX1;P01326;D0EY27;E0CXX7;D3YWU5;D3Z596;D3Z595	Q5EEX1;P01326;D0EY27;E0CXX7	6;6;5;3;2;2;2	6;6;5;3;2;2;2	5;5;5;2;2;2;2	Insulin-2;Insulin-2 B chain;Insulin-2 A chain	Ins2	;;;	7	6	6	5	5	1	4	5	4	5	3	1	1	5	1	4	5	4	5	3	1	1	4	1	3	5	4	4	2	0	0	75.5	75.5	56.4	12.364	110	110;110;109;98;71;79;106	0	248.03	By MS/MS	By MS/MS	By MS/MS
D3YXH9;E9QL22;Q3U1C6-2;Q3U1C6	D3YXH9;E9QL22;Q3U1C6-2;Q3U1C6	1;1;1;1	1;1;1;1	1;1;1;1	Putative deoxyribonuclease TATDN3	Tatdn3	;;;	4	1	1	1	1	1	1	1	1	1	1	1	1	1	1	1	1	1	1	1	1	1	1	1	1	1	1	1	1	1	1	5.8	5.8	5.8	32.279	293	293;294;290;294	0.0097087	1.0518	By MS/MS	By MS/MS	By MS/MS
Q3U7Z6;Q9DBJ1;Q6NWV5;Q5NCI4;O70250	Q3U7Z6;Q9DBJ1;Q6NWV5	7;7;6;3;3	7;7;6;3;3	7;7;6;3;3	Phosphoglycerate mutase 1	Pgam1	;;	5	7	7	7	2	3	2	2	4	4	4	1	0	2	3	2	2	4	4	4	1	0	2	3	2	2	4	4	4	1	0	39.4	39.4	39.4	28.832	254	254;254;197;253;253	0	19.604	By MS/MS	By MS/MS	By MS/MS
Q9WVA4;A0A0A6YXG6	Q9WVA4	3;1	3;1	3;1	Transgelin-2	Tagln2		2	3	3	3	0	2	2	2	3	2	2	1	1	0	2	2	2	3	2	2	1	1	0	2	2	2	3	2	2	1	1	18.1	18.1	18.1	22.395	199	199;90	0	29.228		By MS/MS	By MS/MS
Q8BPI7;Q5M9P0;Q3U5U5;Q3U4D1;Q3TF14;P50247	Q8BPI7;Q5M9P0;Q3U5U5;Q3U4D1;Q3TF14;P50247	3;3;3;3;3;3	3;3;3;3;3;3	3;3;3;3;3;3	Adenosylhomocysteinase	Ahcy	;;;;;	6	3	3	3	0	1	2	1	1	1	3	1	1	0	1	2	1	1	1	3	1	1	0	1	2	1	1	1	3	1	1	13.9	13.9	13.9	36.04	324	324;432;432;432;432;432	0	8.3352		By MS/MS	By MS/MS
Q5M9K1;P07309;Q9D6A4	Q5M9K1;P07309;Q9D6A4	4;4;3	4;4;3	4;4;3	Transthyretin	Ttr	;;	3	4	4	4	2	0	3	1	2	3	3	1	2	2	0	3	1	2	3	3	1	2	2	0	3	1	2	3	3	1	2	39.5	39.5	39.5	15.776	147	147;147;147	0	68.216	By MS/MS		By MS/MS
Q3UDU4;Q564E2;Q3TI99;Q3TCI7;G5E8N5;P06151;D3Z736;D3YZQ9;Q99K20;Q3THB4;Q6NXW3;Q3UIC3	Q3UDU4;Q564E2;Q3TI99;Q3TCI7;G5E8N5;P06151;D3Z736;D3YZQ9;Q99K20;Q3THB4	3;3;3;3;3;3;2;2;2;2;1;1	2;2;2;2;2;2;1;1;1;1;1;1	2;2;2;2;2;2;1;1;1;1;1;1	L-lactate dehydrogenase;L-lactate dehydrogenase A chain	Ldha	;;;;;;;;;	12	3	2	2	0	0	3	1	1	2	3	1	1	0	0	2	1	1	1	2	0	0	0	0	2	1	1	1	2	0	0	9.4	5.8	5.8	36.265	330	330;332;332;332;361;332;237;273;315;332;104;169	0	2.4229			By MS/MS
Q9Z1R3	Q9Z1R3	1	1	1	Apolipoprotein M	Apom		1	1	1	1	1	1	0	1	1	1	1	1	1	1	1	0	1	1	1	1	1	1	1	1	0	1	1	1	1	1	1	7.9	7.9	7.9	21.273	190	190	0	12.343	By matching	By MS/MS
Q4ZJN6;D3YZ61;Q9ES30	Q4ZJN6;D3YZ61;Q9ES30	1;1;1	1;1;1	1;1;1	Complement C1q tumor necrosis factor-related protein 3	C1qtnf3	;;	3	1	1	1	1	1	0	1	1	1	0	1	0	1	1	0	1	1	1	0	1	0	1	1	0	1	1	1	0	1	0	4.5	4.5	4.5	26.828	246	246;319;246	0	7.3113	By matching	By MS/MS
O35490	O35490	1	1	1	Betaine--homocysteine S-methyltransferase 1	Bhmt		1	1	1	1	1	1	0	1	1	1	0	1	0	1	1	0	1	1	1	0	1	0	1	1	0	1	1	1	0	1	0	3.9	3.9	3.9	45.02	407	407	0	3.4603	By matching	By MS/MS
B2RU80	B2RU80	1	1	1	Receptor-type tyrosine-protein phosphatase beta	Ptprb		1	1	1	1	1	1	0	1	1	1	0	1	1	1	1	0	1	1	1	0	1	1	1	1	0	1	1	1	0	1	1	1.1	1.1	1.1	224.49	1998	1998	0.0061983	1.2476	By MS/MS	By MS/MS
Q64374	Q64374	2	2	2	Regucalcin	Rgn		1	2	2	2	1	1	0	1	2	2	1	1	1	1	1	0	1	2	2	1	1	1	1	1	0	1	2	2	1	1	1	9.4	9.4	9.4	33.406	299	299	0	13.924	By MS/MS	By MS/MS
Q9CX41;Q6KAN9;D3Z2X2	Q9CX41;Q6KAN9;D3Z2X2	1;1;1	1;1;1	1;1;1		Dnhd1;mFLJ00251	;;	3	1	1	1	1	1	0	1	1	1	0	1	0	1	1	0	1	1	1	0	1	0	1	1	0	1	1	1	0	1	0	6	6	6	33.141	285	285;1029;4750	1	-2	By MS/MS	By MS/MS
D3Z1S6;Q91XA9	D3Z1S6;Q91XA9	1;1	1;1	1;1	Acidic mammalian chitinase	Chia1;Chia	;	2	1	1	1	0	1	0	1	1	1	0	1	1	0	1	0	1	1	1	0	1	1	0	1	0	1	1	1	0	1	1	4.2	4.2	4.2	24.536	215	215;473	0.0097466	1.062		By MS/MS
Q80XL9;Q8BXQ8	Q80XL9;Q8BXQ8	1;1	1;1	1;1	Protein FAM53C	Fam53c	;	2	1	1	1	0	1	0	1	1	1	0	1	1	0	1	0	1	1	1	0	1	1	0	1	0	1	1	1	0	1	1	18.9	18.9	18.9	5.6035	53	53;393	0.0061856	1.2424		By MS/MS
O89067	O89067	1	1	1		Pou2f2		1	1	1	1	0	1	0	1	1	1	0	1	1	0	1	0	1	1	1	0	1	1	0	1	0	1	1	1	0	1	1	14.3	14.3	14.3	8.7129	77	77	0.0045147	1.6934		By MS/MS
Q3UHS6;Q80TM2;P26039;Q3TBC3;Q0V930	Q3UHS6;Q80TM2;P26039;Q3TBC3;Q0V930	5;5;5;3;3	5;5;5;3;3	5;5;5;3;3	Talin-1	Tln1	;;;;	5	5	5	5	0	2	0	4	4	3	0	1	0	0	2	0	4	4	3	0	1	0	0	2	0	4	4	3	0	1	0	3	3	3	269.83	2541	2541;2564;2541;1051;1190	0	22.761		By MS/MS
Q3UN43;Q4KMV6;Q571D8;Q3U325;Q80XQ2	Q3UN43;Q4KMV6;Q571D8;Q3U325;Q80XQ2	1;1;1;1;1	1;1;1;1;1	1;1;1;1;1	TBC1 domain family member 5	Tbc1d5	;;;;	5	1	1	1	1	1	1	0	1	1	1	1	1	1	1	1	0	1	1	1	1	1	1	1	1	0	1	1	1	1	1	1.3	1.3	1.3	62.176	544	544;653;821;837;815	1	-2	By matching	By matching	By matching
Q0VDL6;Q04899	Q0VDL6;Q04899	1;1	1;1	1;1	Cyclin-dependent kinase 18	Cdk18	;	2	1	1	1	0	1	1	0	1	1	0	1	1	0	1	1	0	1	1	0	1	1	0	1	1	0	1	1	0	1	1	2	2	2	51.847	451	451;451	1	-2		By matching	By matching
Q61171;D3Z4A4;Q5M9N9	Q61171;D3Z4A4;Q5M9N9	5;3;3	5;3;3	5;3;3	Peroxiredoxin-2	Prdx2	;;	3	5	5	5	1	1	2	0	2	2	2	1	0	1	1	2	0	2	2	2	1	0	1	1	2	0	2	2	2	1	0	39.9	39.9	39.9	21.778	198	198;147;198	0	16.723	By matching	By matching	By MS/MS
A1L0U6;A2AS98;P28660-2;P28660	A1L0U6;A2AS98;P28660-2;P28660	1;1;1;1	1;1;1;1	1;1;1;1	Nck-associated protein 1	Nckap1	;;;	4	1	1	1	1	1	1	0	1	1	1	1	1	1	1	1	0	1	1	1	1	1	1	1	1	0	1	1	1	1	1	0.8	0.8	0.8	129.38	1133	1133;1134;1037;1128	0.0080483	1.1916	By MS/MS	By matching	By MS/MS
Q544Y7;P18760;F8WGL3;Q9CX22;Q3UHW9;P45591	Q544Y7;P18760;F8WGL3;Q9CX22	4;4;3;3;1;1	4;4;3;3;1;1	4;4;3;3;1;1	Cofilin-1	Cfl1	;;;	6	4	4	4	0	1	3	0	4	4	3	1	1	0	1	3	0	4	4	3	1	1	0	1	3	0	4	4	3	1	1	34.3	34.3	34.3	18.559	166	166;166;227;229;166;166	0	10.165		By matching	By MS/MS
P35700;B1AXW5;B1AXW6;Q3U9J9;B1AXW4	P35700;B1AXW5;B1AXW6;Q3U9J9	7;6;6;6;3	7;6;6;6;3	6;5;5;5;3	Peroxiredoxin-1	Prdx1	;;;	5	7	7	6	1	0	4	0	3	4	6	1	3	1	0	4	0	3	4	6	1	3	0	0	3	0	3	3	5	1	2	41.2	41.2	37.2	22.176	199	199;170;176;199;123	0	11.904	By matching		By MS/MS
P52480;Q3UEH4;E9Q509;Q3UEI4;A7MCU9;G3X925;P53657	P52480	18;1;1;1;1;1;1	18;1;1;1;1;1;1	2;0;0;0;0;0;0	Pyruvate kinase PKM	Pkm		7	18	18	2	6	0	13	0	9	11	16	1	2	6	0	13	0	9	11	16	1	2	1	0	2	0	0	1	2	0	1	45.2	45.2	6.2	57.844	531	531;543;543;546;570;574;574	0	192.88	By MS/MS		By MS/MS
P27773;F6Q404	P27773	26;3	26;3	26;3	Protein disulfide-isomerase A3	Pdia3		2	26	26	26	5	0	15	0	12	10	19	1	3	5	0	15	0	12	10	19	1	3	5	0	15	0	12	10	19	1	3	59.2	59.2	59.2	56.678	505	505;124	0	101.65	By MS/MS		By MS/MS
Q9QXV0	Q9QXV0	6	6	6	ProSAAS;KEP;Big SAAS;Little SAAS;Big PEN-LEN;PEN;PEN-20;PEN-19;Little LEN;Big LEN	Pcsk1n		1	6	6	6	2	0	5	0	3	2	3	1	1	2	0	5	0	3	2	3	1	1	2	0	5	0	3	2	3	1	1	33.3	33.3	33.3	27.27	258	258	0	12.568	By MS/MS		By MS/MS
Q810T7;E9PVA5	Q810T7;E9PVA5	1;1	1;1	1;1		Slc22a30	;	2	1	1	1	0	0	0	0	1	1	0	1	0	0	0	0	0	1	1	0	1	0	0	0	0	0	1	1	0	1	0	3.1	3.1	3.1	54.565	480	480;480	0.0064516	1.3717
A0A087WNN3;Q6ZPR6-2;Q6ZPR6	A0A087WNN3;Q6ZPR6-2;Q6ZPR6	2;2;2	2;2;2	2;2;2	Inhibitor of Bruton tyrosine kinase	Ibtk	;;	3	2	2	2	2	1	1	0	0	1	1	1	1	2	1	1	0	0	1	1	1	1	2	1	1	0	0	1	1	1	1	3.4	3.4	3.4	54.675	495	495;1251;1352	1	-2	By MS/MS	By MS/MS	By matching
B2CY77;P14206	B2CY77;P14206	3;3	3;3	3;3	40S ribosomal protein SA	Rpsa	;	2	3	3	3	1	0	2	0	0	2	2	1	1	1	0	2	0	0	2	2	1	1	1	0	2	0	0	2	2	1	1	17.6	17.6	17.6	32.85	295	295;295	0	15.808	By matching		By MS/MS
Q9JK98;Q549A5;Q06890;E9Q9B8;E9PUU2;E9PXG5;E9Q8Y5	Q9JK98;Q549A5;Q06890;E9Q9B8;E9PUU2;E9PXG5;E9Q8Y5	3;3;3;2;2;2;2	3;3;3;2;2;2;2	3;3;3;2;2;2;2	Clusterin;Clusterin;Clusterin beta chain;Clusterin alpha chain	Clu	;;;;;;	7	3	3	3	0	0	1	0	0	2	1	1	1	0	0	1	0	0	2	1	1	1	0	0	1	0	0	2	1	1	1	10.2	10.2	10.2	43.109	372	372;448;448;203;225;233;265	0	3.5578			By MS/MS
Q3TNZ8;Q0V927;E9PYT5;Q3UHL7;E9QN70;B9EKB0;P02469	Q3TNZ8;Q0V927;E9PYT5;Q3UHL7;E9QN70;B9EKB0;P02469	1;1;1;1;1;1;1	1;1;1;1;1;1;1	1;1;1;1;1;1;1	Laminin subunit beta-1	Lamb1	;;;;;;	7	1	1	1	0	0	0	0	0	1	1	1	1	0	0	0	0	0	1	1	1	1	0	0	0	0	0	1	1	1	1	4.5	4.5	4.5	37.771	332	332;563;564;1834;1834;1834;1786	0	3.16
Q80TA9	Q80TA9	1	1	1	Ectopic P granules protein 5 homolog	Epg5		1	1	1	1	0	0	1	0	1	0	1	1	1	0	0	1	0	1	0	1	1	1	0	0	1	0	1	0	1	1	1	0.5	0.5	0.5	290.8	2572	2572	0.0080321	1.182			By MS/MS
Q8BKE0;Q9CZ58;Q3UWT6;P49722	Q8BKE0;Q9CZ58;Q3UWT6;P49722	2;2;2;2	2;2;2;2	2;2;2;2	Proteasome subunit alpha type;Proteasome subunit alpha type-2	Psma2	;;;	4	2	2	2	2	0	1	0	2	0	1	1	1	2	0	1	0	2	0	1	1	1	2	0	1	0	2	0	1	1	1	16.4	16.4	16.4	20.786	183	183;234;247;234	0	3.8612	By MS/MS		By MS/MS
Q91Z61	Q91Z61	1	1	1	GTP-binding protein Di-Ras1	Diras1		1	1	1	1	0	0	0	0	1	0	1	1	1	0	0	0	0	1	0	1	1	1	0	0	0	0	1	0	1	1	1	5.1	5.1	5.1	22.264	198	198	0.0099404	1.142
Q3V0F6	Q3V0F6	2	2	2		Gm7337		1	2	2	2	1	0	1	1	0	0	1	1	1	1	0	1	1	0	0	1	1	1	1	0	1	1	0	0	1	1	1	9.9	9.9	9.9	44.925	385	385	1	-2	By matching		By matching
Q8R593	Q8R593	1	1	1		Rchy1		1	1	1	1	1	1	0	1	0	0	0	1	1	1	1	0	1	0	0	0	1	1	1	1	0	1	0	0	0	1	1	3.8	3.8	3.8	29.988	261	261	0.0060852	1.2024	By matching	By MS/MS
A2ASS6-3;F7CR78	A2ASS6-3;F7CR78	2;1	2;1	1;0	Titin	Ttn	;	2	2	2	1	1	1	0	1	0	0	0	1	2	1	1	0	1	0	0	0	1	2	1	1	0	1	0	0	0	1	1	0.5	0.5	0.3	619.32	5508	5508;8272	0.0063158	1.2957	By MS/MS	By MS/MS
E9Q8N1;E9Q8K5;A2ASS6-2;A2ASS6	E9Q8N1;E9Q8K5;A2ASS6-2;A2ASS6	2;2;2;2	1;1;1;1	1;1;1;1	Titin	Ttn	;;;	4	2	1	1	0	1	0	1	0	0	0	1	1	0	1	0	1	0	0	0	1	0	0	1	0	1	0	0	0	1	0	0.1	0	0	3716	33467	33467;33467;26886;35213	1	-2		By MS/MS
Q3UN37;B2RVF4;H3BKF1;E9PYM1;E9Q0Z5;D3YWC7	Q3UN37;B2RVF4;H3BKF1;E9PYM1;E9Q0Z5;D3YWC7	1;1;1;1;1;1	1;1;1;1;1;1	1;1;1;1;1;1		Fam47e	;;;;;	6	1	1	1	1	0	1	0	0	0	1	1	1	1	0	1	0	0	0	1	1	1	1	0	1	0	0	0	1	1	1	9.9	9.9	9.9	11.797	101	101;101;121;199;260;402	1	-2	By MS/MS		By matching
G3X9K3	G3X9K3	1	1	1	Brefeldin A-inhibited guanine nucleotide-exchange protein 1	Arfgef1		1	1	1	1	1	0	1	0	0	0	1	1	1	1	0	1	0	0	0	1	1	1	1	0	1	0	0	0	1	1	1	0.8	0.8	0.8	208.5	1846	1846	1	-2	By MS/MS		By matching
G3UWN9;G3UXY0;G3X9K9;G3UXZ5;Q5HZK3;P97371	G3UWN9;G3UXY0;G3X9K9;G3UXZ5;Q5HZK3;P97371	1;1;1;1;1;1	1;1;1;1;1;1	1;1;1;1;1;1	Proteasome activator complex subunit 1	Psme1	;;;;;	6	1	1	1	0	0	1	0	0	0	1	1	1	0	0	1	0	0	0	1	1	1	0	0	1	0	0	0	1	1	1	6.9	6.9	6.9	19.774	173	173;226;236;238;249;249	0.009901	1.1311			By matching
Q3TGB1;Q9CQ26	Q3TGB1;Q9CQ26	1;1	1;1	1;1	STAM-binding protein	Stambp	;	2	1	1	1	0	0	1	0	0	0	1	1	1	0	0	1	0	0	0	1	1	1	0	0	1	0	0	0	1	1	1	3.3	3.3	3.3	48.553	424	424;424	1	-2			By matching
Q8C6F9;Q3TV26;P43137	Q8C6F9;Q3TV26;P43137	5;5;5	5;5;5	5;5;5	Lithostathine-1	Reg1	;;	3	5	5	5	2	1	5	0	0	0	5	1	3	2	1	5	0	0	0	5	1	3	2	1	5	0	0	0	5	1	3	45.2	45.2	45.2	14.34	126	126;165;165	0	32.842	By MS/MS	By MS/MS	By MS/MS
A0A097PUD0;A0A097PUG4	A0A097PUD0;A0A097PUG4	4;4	4;4	4;4			;	2	4	4	4	1	0	4	0	0	0	4	1	1	1	0	4	0	0	0	4	1	1	1	0	4	0	0	0	4	1	1	29.4	29.4	29.4	25.616	235	235;238	0	58.592	By matching		By MS/MS
A0A0B6VSQ6;P15947;A0A0U1RPN5;Q7M0B4;P15945	A0A0B6VSQ6;P15947;A0A0U1RPN5	5;5;4;2;2	5;5;4;2;2	5;5;4;2;2	Kallikrein-1	Klk1	;;	5	5	5	5	1	0	5	0	0	0	5	1	3	1	0	5	0	0	0	5	1	3	1	0	5	0	0	0	5	1	3	29.1	29.1	29.1	28.774	261	261;261;151;94;261	0	5.2884	By matching		By MS/MS
A0A0R4J293;Q9JLF6	A0A0R4J293;Q9JLF6	3;3	3;3	3;3	Protein-glutamine gamma-glutamyltransferase K	Tgm1	;	2	3	3	3	1	0	3	0	0	0	2	1	1	1	0	3	0	0	0	2	1	1	1	0	3	0	0	0	2	1	1	4	4	4	89.795	815	815;815	0.0065076	1.3994	By matching		By MS/MS
Q0QEW9;Q642K1;Q58EW0;P35980;G3UZJ6;G3UZK4	Q0QEW9;Q642K1;Q58EW0;P35980;G3UZJ6;G3UZK4	2;2;2;2;1;1	2;2;2;2;1;1	2;2;2;2;1;1	60S ribosomal protein L18	Rpl18	;;;;;	6	2	2	2	1	0	2	0	0	0	2	1	1	1	0	2	0	0	0	2	1	1	1	0	2	0	0	0	2	1	1	14.2	14.2	14.2	19.231	169	169;188;188;188;126;136	0.0045351	1.7891	By matching		By MS/MS
F7A6H4;E9Q555	F7A6H4;E9Q555	2;2	2;2	2;2	E3 ubiquitin-protein ligase RNF213	Rnf213	;	2	2	2	2	1	0	1	0	0	0	2	1	1	1	0	1	0	0	0	2	1	1	1	0	1	0	0	0	2	1	1	0.6	0.6	0.6	584.78	5152	5152;5152	1	-2	By MS/MS		By MS/MS
Q542G9;P07356;Q3UCD3;Q9CZI7;B0V2N7;B0V2N8;Q99KH3;B0V2N5	Q542G9;P07356;Q3UCD3;Q9CZI7;B0V2N7;B0V2N8;Q99KH3;B0V2N5	11;11;10;10;8;7;7;6	11;11;10;10;8;7;7;6	11;11;10;10;8;7;7;6	Annexin;Annexin A2	Anxa2	;;;;;;;	8	11	11	11	2	0	10	0	0	0	10	1	1	2	0	10	0	0	0	10	1	1	2	0	10	0	0	0	10	1	1	36.6	36.6	36.6	38.676	339	339;339;339;339;196;176;222;272	0	40.911	By MS/MS		By MS/MS
F6UFG6;D3YYE1;D3Z7M9;Q64G17;O35381	F6UFG6;D3YYE1;D3Z7M9;Q64G17;O35381	3;3;3;3;3	3;3;3;3;3	3;3;3;3;3	Putative acidic leucine-rich nuclear phosphoprotein 32 family member C;Acidic leucine-rich nuclear phosphoprotein 32 family member A	Anp32a;Anp32c	;;;;	5	3	3	3	1	0	3	0	0	0	3	1	1	1	0	3	0	0	0	3	1	1	1	0	3	0	0	0	3	1	1	15.2	15.2	15.2	15.306	138	138;198;233;123;247	0	2.5859	By MS/MS		By MS/MS
Q8C4K6;Q32ME9;Q2VPA9;P55849-2;P55849	Q8C4K6;Q32ME9;Q2VPA9;P55849-2;P55849	1;1;1;1;1	1;1;1;1;1	1;1;1;1;1	Desmocollin-1	Dsc1	;;;;	5	1	1	1	1	0	1	0	0	0	1	1	0	1	0	1	0	0	0	1	1	0	1	0	1	0	0	0	1	1	0	0.8	0.8	0.8	92.741	832	832;832;863;839;886	0.0062762	1.2736	By MS/MS		By MS/MS
P48678-3;P48678-2;P48678	P48678-3;P48678-2;P48678	3;3;3	3;3;3	3;3;3	Prelamin-A/C;Lamin-A/C	Lmna	;;	3	3	3	3	0	0	3	0	0	0	2	1	0	0	0	3	0	0	0	2	1	0	0	0	3	0	0	0	2	1	0	8.2	8.2	8.2	52.651	462	462;574;665	0.0023753	2.0441			By MS/MS
Q9Z2L2;D3YZ06;Q545F4;P14602-3;P14602-2;P14602	Q9Z2L2;D3YZ06;Q545F4;P14602-3;P14602-2;P14602	2;1;1;1;1;1	2;1;1;1;1;1	2;1;1;1;1;1	Heat shock protein beta-1	Hspb1	;;;;;	6	2	2	2	0	0	2	0	0	0	1	1	0	0	0	2	0	0	0	1	1	0	0	0	2	0	0	0	1	1	0	30.5	30.5	30.5	9.4115	82	82;147;209;175;197;209	0	3.169			By MS/MS
Q91VR8	Q91VR8	1	1	1	Protein BRICK1	Brk1		1	1	1	1	0	1	0	0	0	0	1	1	1	0	1	0	0	0	0	1	1	1	0	1	0	0	0	0	1	1	1	9.3	9.3	9.3	8.7608	75	75	0	3.0632		By MS/MS
Q8CFJ0;E9Q6P8	Q8CFJ0;E9Q6P8	1;1	1;1	1;1		Rsrc1	;	2	1	1	1	1	0	0	0	0	0	0	1	0	1	0	0	0	0	0	0	1	0	1	0	0	0	0	0	0	1	0	3.2	3.2	3.2	33.088	281	281;281	1	-2	By MS/MS
A0A140LIH9;A0A140LIJ9;E9Q173	A0A140LIH9;A0A140LIJ9;E9Q173	1;1;1	1;1;1	1;1;1	BTB/POZ domain-containing protein 16	Btbd16	;;	3	1	1	1	0	0	0	0	0	0	0	1	0	0	0	0	0	0	0	0	1	0	0	0	0	0	0	0	0	1	0	3.6	3.6	3.6	37.709	329	329;506;522	1	-2
Q792A4;P56392	Q792A4;P56392	1;1	1;1	1;1	Cytochrome c oxidase subunit 7A1, mitochondrial	Cox7a1	;	2	1	1	1	0	0	0	0	0	0	0	1	0	0	0	0	0	0	0	0	1	0	0	0	0	0	0	0	0	1	0	15	15	15	8.9863	80	80;80	1	-2
P70181-2;P70181	P70181-2;P70181	1;1	1;1	1;1	Phosphatidylinositol 4-phosphate 5-kinase type-1 beta	Pip5k1b	;	2	1	1	1	0	0	0	0	0	0	0	1	0	0	0	0	0	0	0	0	1	0	0	0	0	0	0	0	0	1	0	2.3	2.3	2.3	55.079	487	487;539	1	-2
Q8C5B4
P00688
E9Q557
Q4KL81
Q3UAF7
Q3UBP6
Q02257
Q9QZ83
Q8K016
P26339
Q6IMF0
P11679
Q543J5
Q8VI54
Q3U9G2
Q9CR35
B2RS76
Q8BIS2
Q9R0T7
Q5BKQ4
P05213
Q3UDR2
P63101
Q3UV17
Q7TPZ8
Q3TWK8
Q792Y6
P68369
A0A0A0MQA5
Q5FW97
Q91X79
Q9ER05
Q6P8U6
P97298
Q61782
Q9CQ52
B9EIU2
D3Z6P0-2
Q8BFZ3
P05208
Q5SX49
Q99LL6
B2RTL6
Q543R4
S4R257
Q5SVY2
Q792Z1
Q64727
A8DUK0
Q9D7Y7
Q3UBA6
Q91V38
Q91VL4
P47867
A0JLV3
P68372
Q58E64
Q5SS40
D3YW52
P55095
Q3UZV3
Q03517
B2RTM0
B2MWM9
A5JUZ1
B2RQH0
Q54AH9
Q9JJ20
A6BLY7
Q9DCY1
B2RSN3
Q3TPE1
Q3UUX9
Q5M8R8
Q3TLL6
A2A5N2
A3KML3
Q3TED3
P99024
Q53ZU7
Q5NC82
Q8C153
Q3THH1
E9Q704
Q04857
Q545I7
Q3TT51
P17751
P16125
F6W4D3
Q5FWB7
H7BWY6
E9Q1Y3
B9EKB8
B7ZNJ1
P14152
P62204
P28481-2
Q8R016
Q80U29
Q545J0
Q9CY10
Q3UEK0
Q546G4
D3Z6E4
Q3V206
A0A0J9YUH8
A0A0A6YWU2
Q5F209
D6RI51
A0A0R4J2A0
Q8BUY8
A8IP69
Q642I5
A0A087WP24
Q99PT1
P12960
Q8CG46-2
P52480-2
P99027
P68510
S4R2B5
A0A0U1RQ57
A6H6Q4
P09411
P48036
Q5EBQ2
A2A5K2
Q3V1L5
Q80Y52
G3UY13
G3UYM8
Q71LX8
F8WIX8
Q2T9H5
Q5EEX1
D3YXH9
Q3U7Z6
Q9WVA4
Q8BPI7
Q5M9K1
Q3UDU4
Q9Z1R3
Q4ZJN6
O35490
B2RU80
Q64374
Q9CX41
D3Z1S6
Q80XL9
O89067
Q3UHS6
Q3UN43
Q0VDL6
Q61171
A1L0U6
Q544Y7
P35700
P52480
P27773
Q9QXV0
Q810T7
A0A087WNN3
B2CY77
Q9JK98
Q3TNZ8
Q80TA9
Q8BKE0
Q91Z61
Q3V0F6
Q8R593
A2ASS6-3
E9Q8N1
Q3UN37
G3X9K3
G3UWN9
Q3TGB1
Q8C6F9
A0A097PUD0
A0A0B6VSQ6
A0A0R4J293
Q0QEW9
F7A6H4
Q542G9
F6UFG6
Q8C4K6
P48678-3
Q9Z2L2
Q91VR8
Q8CFJ0
A0A140LIH9
Q792A4
P70181-2
[truncated: 72 more columns]

## Sheet: Normal-3
Protein IDs	Majority protein IDs	Peptide counts (all)	Peptide counts (razor+unique)	Peptide counts (unique)	Protein names	Gene names	Fasta headers	Number of proteins	Peptides	Razor + unique peptides	Unique peptides	Peptides 1EG-1	Peptides 1EG-2	Peptides 1EG-3	Peptides 2EG-1	Peptides 2EG-2	Peptides 2EG-3	Peptides Normal-1	Peptides Normal-2	Peptides Normal-3	Razor + unique peptides 1EG-1	Razor + unique peptides 1EG-2	Razor + unique peptides 1EG-3	Razor + unique peptides 2EG-1	Razor + unique peptides 2EG-2	Razor + unique peptides 2EG-3	Razor + unique peptides Normal-1	Razor + unique peptides Normal-2	Razor + unique peptides Normal-3	Unique peptides 1EG-1	Unique peptides 1EG-2	Unique peptides 1EG-3	Unique peptides 2EG-1	Unique peptides 2EG-2	Unique peptides 2EG-3	Unique peptides Normal-1	Unique peptides Normal-2	Unique peptides Normal-3	Sequence coverage [%]	Unique + razor sequence coverage [%]	Unique sequence coverage [%]	Mol. weight [kDa]	Sequence length	Sequence lengths	Q-value	Score	Identification type 1EG-1	Identification type 1EG-2	Identification type 1EG-3
Q3UEK0;Q9Z0K8	Q3UEK0;Q9Z0K8	1;1	1;1	1;1	Pantetheinase	Vnn1	;	2	1	1	1	1	1	1	1	1	1	1	1	1	1	1	1	1	1	1	1	1	1	1	1	1	1	1	1	1	1	1	4	4	4	36.775	328	328;512	0	26.693	By MS/MS	By matching	By MS/MS
Q61833;A2ACG7;Q3U505;Q9DBG6	Q61833;A2ACG7;Q3U505;Q9DBG6	2;2;2;2	2;2;2;2	2;2;2;2	Dolichyl-diphosphooligosaccharide--protein glycosyltransferase subunit 2	Rpn2	;;;	4	2	2	2	0	1	1	0	1	1	1	0	1	0	1	1	0	1	1	1	0	1	0	1	1	0	1	1	1	0	1	6.3	6.3	6.3	66.301	607	607;615;659;631	0	2.8673		By MS/MS	By matching
Q3V206	Q3V206	1	1	1		Ptrh1		1	1	1	1	1	1	1	1	1	1	0	1	1	1	1	1	1	1	1	0	1	1	1	1	1	1	1	1	0	1	1	7.2	7.2	7.2	22.047	209	209	0.0098232	1.0891	By matching	By matching	By matching
A0A0J9YUH8	A0A0J9YUH8	1	1	1				1	1	1	1	1	1	1	1	1	1	1	1	1	1	1	1	1	1	1	1	1	1	1	1	1	1	1	1	1	1	1	11	11	11	8.8338	73	73	0.0099206	1.1334	By MS/MS	By MS/MS	By MS/MS
D6RI51;Q9JLT2	D6RI51;Q9JLT2	1;1	1;1	1;1	Trehalase	Treh	;	2	1	1	1	1	1	1	0	1	1	1	1	1	1	1	1	0	1	1	1	1	1	1	1	1	0	1	1	1	1	1	4.7	4.7	4.7	17.255	150	150;576	0.006263	1.2734	By MS/MS	By matching	By MS/MS
Q8BUY8	Q8BUY8	1	1	1	G-protein coupled receptor-associated sorting protein 2	Gprasp2		1	1	1	1	1	0	1	0	0	1	1	1	1	1	0	1	0	0	1	1	1	1	1	0	1	0	0	1	1	1	1	1.9	1.9	1.9	92.801	826	826	0.006135	1.2271	By MS/MS		By MS/MS
A8IP69;P61982	A8IP69;P61982	4;4	2;2	2;2	14-3-3 protein gamma;14-3-3 protein gamma, N-terminally processed	Ywhag	;	2	4	2	2	3	1	2	1	1	3	3	1	1	1	0	0	0	0	2	1	0	0	1	0	0	0	0	2	1	0	0	20.6	13.4	13.4	28.302	247	247;247	0	17.536	By MS/MS	By matching	By matching
Q642I5;Q9DBB9	Q642I5;Q9DBB9	1;1	1;1	1;1	Carboxypeptidase N subunit 2	Cpn2	;	2	1	1	1	1	1	1	1	1	1	1	1	1	1	1	1	1	1	1	1	1	1	1	1	1	1	1	1	1	1	1	1.9	1.9	1.9	45.709	413	413;547	0.0097656	1.0675	By MS/MS	By matching	By MS/MS
Q07797;E9Q5X5	Q07797	4;1	4;1	4;1	Galectin-3-binding protein	Lgals3bp		2	4	4	4	0	0	3	1	2	3	3	0	1	0	0	3	1	2	3	3	0	1	0	0	3	1	2	3	3	0	1	11.6	11.6	11.6	64.49	577	577;204	0	16.067			By MS/MS
Q3TPE1;Q3TD35;Q3U017;Q2I0J8;Q2I0J7;E9QPU1;Q8CIZ8-2;Q8CIZ8	Q3TPE1;Q3TD35;Q3U017;Q2I0J8;Q2I0J7;E9QPU1;Q8CIZ8-2;Q8CIZ8	2;2;2;2;2;2;2;2	2;2;2;2;2;2;2;2	2;2;2;2;2;2;2;2	von Willebrand factor;von Willebrand antigen 2	Vwf	;;;;;;;	8	2	2	2	2	1	0	1	1	1	0	2	1	2	1	0	1	1	1	0	2	1	2	1	0	1	1	1	0	2	1	10.4	10.4	10.4	44.796	405	405;420;1126;2813;2813;2813;402;2813	0	3.7363	By MS/MS	By matching
Q99PT1	Q99PT1	4	4	4	Rho GDP-dissociation inhibitor 1	Arhgdia		1	4	4	4	0	1	2	1	1	1	3	1	1	0	1	2	1	1	1	3	1	1	0	1	2	1	1	1	3	1	1	41.2	41.2	41.2	23.407	204	204	0	38.973		By matching	By MS/MS
P12960	P12960	3	3	3	Contactin-1	Cntn1		1	3	3	3	2	2	0	1	2	1	1	1	1	2	2	0	1	2	1	1	1	1	2	2	0	1	2	1	1	1	1	4.2	4.2	4.2	113.39	1020	1020	0	6.0493	By matching	By MS/MS
Q8CG46-2;Q8CG46	Q8CG46-2;Q8CG46	1;1	1;1	1;1	Structural maintenance of chromosomes protein 5	Smc5	;	2	1	1	1	1	1	1	0	1	1	1	1	1	1	1	1	0	1	1	1	1	1	1	1	1	0	1	1	1	1	1	1	1	1	127.38	1087	1087;1101	1	-2	By matching	By matching	By matching
P52480-2	P52480-2	17	1	1	Pyruvate kinase PKM	Pkm		1	17	1	1	5	0	11	0	9	11	14	1	1	0	0	0	0	0	1	0	0	0	0	0	0	0	0	1	0	0	0	40.5	1.5	1.5	57.984	531	531	0.00611	1.2106	By matching		By matching
Q5M8R8;Q5FWB6;P14869;S4R1N1;E9Q070;D3YVM5;O89073	Q5M8R8;Q5FWB6;P14869;S4R1N1;E9Q070;D3YVM5	5;5;5;4;4;3;1	5;5;5;4;4;3;1	5;5;5;4;4;3;1	60S acidic ribosomal protein P0	Rplp0;Gm8730	;;;;;	7	5	5	5	0	0	1	0	3	5	3	2	1	0	0	1	0	3	5	3	2	1	0	0	1	0	3	5	3	2	1	21.5	21.5	21.5	34.216	317	317;317;317;221;317;145;131	0	9.2286			By matching
Q4FZK2;Q9D8N0;Q8R1N8	Q4FZK2;Q9D8N0;Q8R1N8	4;4;3	4;4;3	4;4;3	Elongation factor 1-gamma	Eef1g	;;	3	4	4	4	0	0	3	0	1	2	3	0	1	0	0	3	0	1	2	3	0	1	0	0	3	0	1	2	3	0	1	9.8	9.8	9.8	50.06	437	437;437;317	0	4.3138			By MS/MS
P99027	P99027	3	3	3	60S acidic ribosomal protein P2	Rplp2		1	3	3	3	0	0	3	0	1	1	3	1	1	0	0	3	0	1	1	3	1	1	0	0	3	0	1	1	3	1	1	50.4	50.4	50.4	11.651	115	115	0	12.284			By MS/MS
P68510	P68510	3	1	1	14-3-3 protein eta	Ywhah		1	3	1	1	2	1	2	1	2	2	2	1	1	0	0	0	0	1	1	0	0	0	0	0	0	0	1	1	0	0	0	13.4	6.1	6.1	28.211	246	246	0	2.1308	By matching	By matching	By matching
S4R2B5;Q6R6I7	S4R2B5;Q6R6I7	1;1	1;1	1;1	Relaxin receptor 1	Rxfp1	;	2	1	1	1	1	1	1	1	1	1	1	1	1	1	1	1	1	1	1	1	1	1	1	1	1	1	1	1	1	1	1	13.7	13.7	13.7	11.191	102	102;758	0.0096154	1.0389	By MS/MS	By matching	By matching
A0A0U1RQ57	A0A0U1RQ57	1	1	1				1	1	1	1	0	1	1	1	1	1	1	1	1	0	1	1	1	1	1	1	1	1	0	1	1	1	1	1	1	1	1	6.6	6.6	6.6	25.283	226	226	1	-2		By matching	By matching
Q5RKP4;Q8BMR3;Q3U900;Q91YQ5;Q99LY0	Q5RKP4;Q8BMR3;Q3U900;Q91YQ5;Q99LY0	3;3;3;3;2	3;3;3;3;2	3;3;3;3;2	Dolichyl-diphosphooligosaccharide--protein glycosyltransferase subunit 1	Rpn1	;;;;	5	3	3	3	0	1	1	1	1	1	2	0	1	0	1	1	1	1	1	2	0	1	0	1	1	1	1	1	2	0	1	5.4	5.4	5.4	68.396	607	607;608;608;608;280	0.0064935	1.3922		By matching	By matching
A6H6Q4	A6H6Q4	1	1	1	Uncharacterized protein C19orf71 homolog			1	1	1	1	1	1	1	1	1	1	1	1	1	1	1	1	1	1	1	1	1	1	1	1	1	1	1	1	1	1	1	4.4	4.4	4.4	23.954	206	206	1	-2	By MS/MS	By MS/MS	By matching
P09411;S4R2M7;P09041	P09411	11;5;2	11;5;2	11;5;2	Phosphoglycerate kinase 1	Pgk1		3	11	11	11	3	1	6	1	3	4	10	1	1	3	1	6	1	3	4	10	1	1	3	1	6	1	3	4	10	1	1	31.7	31.7	31.7	44.55	417	417;255;417	0	15.477	By matching	By matching	By MS/MS
Q8C153;Q3UZ14;Q3UMI7;Q3UDC8;Q3TX47;Q3TWX1;Q3TLB1;Q3TJZ1;P58252;Q6P9L9;Q8BMA8;Q3TW58;Q3UBL9;Q3TK17;Q3TSK4;Q3TPG2;Q99LT6;Q61509;O89070;O89069	Q8C153;Q3UZ14;Q3UMI7;Q3UDC8;Q3TX47;Q3TWX1;Q3TLB1;Q3TJZ1;P58252;Q6P9L9;Q8BMA8;Q3TW58;Q3UBL9;Q3TK17;Q3TSK4;Q3TPG2;Q99LT6	17;17;17;17;17;17;17;17;17;16;16;16;16;16;12;11;9;8;1;1	17;17;17;17;17;17;17;17;17;16;16;16;16;16;12;11;9;8;1;1	17;17;17;17;17;17;17;17;17;16;16;16;16;16;12;11;9;8;1;1	Elongation factor 2	Eef2	;;;;;;;;;;;;;;;;	20	17	17	17	3	2	5	1	8	11	10	2	1	3	2	5	1	8	11	10	2	1	3	2	5	1	8	11	10	2	1	26	26	26	95.257	858	858;858;858;858;858;858;858;858;858;843;858;858;858;858;418;367;287;268;109;259	0	33.316	By MS/MS	By matching	By MS/MS
P48036;A0A0G2JGQ0	P48036	13;5	13;5	13;5	Annexin A5	Anxa5		2	13	13	13	6	0	7	1	7	6	9	1	1	6	0	7	1	7	6	9	1	1	6	0	7	1	7	6	9	1	1	43.9	43.9	43.9	35.752	319	319;137	0	62.56	By MS/MS		By MS/MS
Q5EBQ2;Q3TGC5;P70296;D3Z1V4;D6RHS6	Q5EBQ2;Q3TGC5;P70296;D3Z1V4;D6RHS6	6;6;6;5;3	6;6;6;5;3	6;6;6;5;3	Phosphatidylethanolamine-binding protein 1;Hippocampal cholinergic neurostimulating peptide	Pebp1	;;;;	5	6	6	6	2	0	4	1	5	5	5	1	1	2	0	4	1	5	5	5	1	1	2	0	4	1	5	5	5	1	1	57.8	57.8	57.8	20.83	187	187;187;187;209;136	0	34.229	By MS/MS		By MS/MS
G3UY13;Q3UEL3;E9Q6I2;Q3V2X3;Q3UVZ1;Q61730-2;Q61730;Q61730-3	G3UY13;Q3UEL3;E9Q6I2;Q3V2X3;Q3UVZ1;Q61730-2;Q61730;Q61730-3	2;2;2;2;2;2;2;2	2;2;2;2;2;2;2;2	2;2;2;2;2;2;2;2	Interleukin-1 receptor accessory protein	Il1rap	;;;;;;;	8	2	2	2	1	2	1	1	1	1	1	1	1	1	2	1	1	1	1	1	1	1	1	2	1	1	1	1	1	1	1	5.5	5.5	5.5	39.881	346	346;360;640;685;685;360;570;685	0	2.238	By MS/MS	By MS/MS	By matching
G3UYM8;Q80U26;F6VR53;D3YUF3;D3YUF4;G3UXP9;E9Q863;Q003U3;E9PY13;E9PY12;Q3UHQ9;G3UX72;E9PXE1;E9QPM7;Q6PDM6;E9PXE2;Q64096;Q8C7Z1	G3UYM8;Q80U26;F6VR53;D3YUF3;D3YUF4;G3UXP9;E9Q863;Q003U3;E9PY13;E9PY12;Q3UHQ9;G3UX72;E9PXE1;E9QPM7;Q6PDM6;E9PXE2;Q64096;Q8C7Z1	2;2;2;2;2;2;2;2;2;2;2;2;2;2;2;2;2;1	2;2;2;2;2;2;2;2;2;2;2;2;2;2;2;2;2;1	2;2;2;2;2;2;2;2;2;2;2;2;2;2;2;2;2;1	Guanine nucleotide exchange factor DBS	Mcf2l	;;;;;;;;;;;;;;;;;	18	2	2	2	0	2	1	1	2	2	0	1	1	0	2	1	1	2	2	0	1	1	0	2	1	1	2	2	0	1	1	3	3	3	86.56	757	757;806;807;866;1046;1059;1067;1097;1097;1101;1118;1118;1125;1149;1166;1175;1149;477	0	3.5807		By MS/MS	By matching
Q3TT51;P12961	Q3TT51;P12961	4;4	4;4	4;4	Neuroendocrine protein 7B2;N-terminal peptide;C-terminal peptide	Scg5	;	2	4	4	4	3	1	4	1	3	3	3	2	1	3	1	4	1	3	3	3	2	1	3	1	4	1	3	3	3	2	1	30.7	30.7	30.7	23.866	212	212;212	0	46.933	By MS/MS	By matching	By MS/MS
F8WIX8;A0A0N4SV66;A0AUV1;A3KPD0;Q8CGP4;Q149V4;B2RWH3;B2RVF0;A2AB79;Q8CGP6;Q8R1M2;Q64523;Q8CGP7;Q8CGP5;Q8BFU2;Q6GSS7;P22752;B2RVP5;Q3THW5;P0C0S6;P27661;Q61668;G3UWL7;Q8R029;Q3TFU6;Q3UA95;Q64522	F8WIX8;A0A0N4SV66;A0AUV1;A3KPD0;Q8CGP4;Q149V4;B2RWH3;B2RVF0;A2AB79;Q8CGP6;Q8R1M2;Q64523;Q8CGP7;Q8CGP5;Q8BFU2;Q6GSS7;P22752;B2RVP5;Q3THW5;P0C0S6;P27661	3;3;3;3;3;3;3;3;3;3;3;3;3;3;3;3;3;2;2;2;2;1;1;1;1;1;1	3;3;3;3;3;3;3;3;3;3;3;3;3;3;3;3;3;2;2;2;2;1;1;1;1;1;1	3;3;3;3;3;3;3;3;3;3;3;3;3;3;3;3;3;2;2;2;2;1;1;1;1;1;1	Histone H2A;Histone H2A type 1-H;Histone H2A.J;Histone H2A type 2-C;Histone H2A type 1-K;Histone H2A type 1-F;Histone H2A type 3;Histone H2A type 2-A;Histone H2A type 1;Histone H2A.V;Histone H2A.Z;Histone H2AX	Hist1h2al;Hist1h2ah;Hist1h2aa;Hist2h2ac;Hist2h2aa1;Hist1h2ad;Hist3h2a;H2afj;Hist1h2ak;Hist1h2af;Hist1h2ab;H2afv;H2afz;H2afx	;;;;;;;;;;;;;;;;;;;;	27	3	3	3	2	1	3	1	2	1	2	1	1	2	1	3	1	2	1	2	1	1	2	1	3	1	2	1	2	1	1	28	28	28	13.607	125	125;126;127;128;129;129;130;130;130;128;129;129;130;130;130;130;130;128;128;128;143;37;87;90;90;105;130	0	6.2244	By MS/MS	By matching	By MS/MS
Q1A602;Q3ULT2;Q3UDJ7;P57780;A1BN54;Q7TPR4;E9Q2W9;Q8BP35;D3Z0L8;O88990;D3Z761;Q99LJ3;Q8K3Q4;Q5FW75;Q9JI91;Q61063;Q61064	Q1A602;Q3ULT2;Q3UDJ7;P57780;A1BN54;Q7TPR4;E9Q2W9	10;10;10;10;7;7;6;3;3;3;2;2;2;2;2;1;1	10;10;10;10;7;7;6;3;3;3;2;2;2;2;2;1;1	10;10;10;10;7;7;6;3;3;3;2;2;2;2;2;1;1	Alpha-actinin-4;Alpha-actinin-1	Actn4;Actn1	;;;;;;	17	10	10	10	1	2	7	3	3	1	7	0	1	1	2	7	3	3	1	7	0	1	1	2	7	3	3	1	7	0	1	13.5	13.5	13.5	104.91	911	911;912;912;912;887;892;518;202;206;900;133;400;894;894;894;72;109	0	23.688	By matching	By MS/MS	By MS/MS
Q2T9H5;Q9QZ25	Q2T9H5;Q9QZ25	1;1	1;1	1;1	Vascular non-inflammatory molecule 3	Vnn3	;	2	1	1	1	1	1	1	1	1	1	1	1	1	1	1	1	1	1	1	1	1	1	1	1	1	1	1	1	1	1	1	2.4	2.4	2.4	56.229	500	500;500	0	4.3077	By MS/MS	By MS/MS	By MS/MS
Q5EEX1;P01326;D0EY27;E0CXX7;D3YWU5;D3Z596;D3Z595	Q5EEX1;P01326;D0EY27;E0CXX7	6;6;5;3;2;2;2	6;6;5;3;2;2;2	5;5;5;2;2;2;2	Insulin-2;Insulin-2 B chain;Insulin-2 A chain	Ins2	;;;	7	6	6	5	5	1	4	5	4	5	3	1	1	5	1	4	5	4	5	3	1	1	4	1	3	5	4	4	2	0	0	75.5	75.5	56.4	12.364	110	110;110;109;98;71;79;106	0	248.03	By MS/MS	By MS/MS	By MS/MS
P16125;Q5M8R7;D3Z7F0;A0A0N4SVV8;D3YVR7;D3YZE4;Q64483;Q548Z6;P00342	P16125;Q5M8R7;D3Z7F0	6;3;3;2;1;1;1;1;1	6;3;3;2;1;1;1;1;1	5;3;2;1;0;0;0;0;0	L-lactate dehydrogenase B chain;L-lactate dehydrogenase	Ldhb	;;	9	6	6	5	1	3	2	3	3	4	1	2	1	1	3	2	3	3	4	1	2	1	1	3	1	3	3	3	0	1	0	22.5	22.5	18.9	36.572	334	334;101;198;193;235;237;332;332;332	0	11.82	By MS/MS	By MS/MS	By MS/MS
D3YXH9;E9QL22;Q3U1C6-2;Q3U1C6	D3YXH9;E9QL22;Q3U1C6-2;Q3U1C6	1;1;1;1	1;1;1;1	1;1;1;1	Putative deoxyribonuclease TATDN3	Tatdn3	;;;	4	1	1	1	1	1	1	1	1	1	1	1	1	1	1	1	1	1	1	1	1	1	1	1	1	1	1	1	1	1	1	5.8	5.8	5.8	32.279	293	293;294;290;294	0.0097087	1.0518	By MS/MS	By MS/MS	By MS/MS
F6W4D3;D3YY36;Q8VC96;Q9DBD0	F6W4D3;D3YY36;Q8VC96;Q9DBD0	2;2;2;2	1;1;1;1	1;1;1;1	Inhibitor of carbonic anhydrase	1300017J02Rik;Ica	;;;	4	2	1	1	2	2	1	1	2	2	1	2	1	1	1	1	1	1	1	1	1	1	1	1	1	1	1	1	1	1	1	9.9	5.4	5.4	26.65	242	242;622;700;700	0	13.41	By MS/MS	By MS/MS	By MS/MS
Q9WVA4;A0A0A6YXG6	Q9WVA4	3;1	3;1	3;1	Transgelin-2	Tagln2		2	3	3	3	0	2	2	2	3	2	2	1	1	0	2	2	2	3	2	2	1	1	0	2	2	2	3	2	2	1	1	18.1	18.1	18.1	22.395	199	199;90	0	29.228		By MS/MS	By MS/MS
Q8BPI7;Q5M9P0;Q3U5U5;Q3U4D1;Q3TF14;P50247	Q8BPI7;Q5M9P0;Q3U5U5;Q3U4D1;Q3TF14;P50247	3;3;3;3;3;3	3;3;3;3;3;3	3;3;3;3;3;3	Adenosylhomocysteinase	Ahcy	;;;;;	6	3	3	3	0	1	2	1	1	1	3	1	1	0	1	2	1	1	1	3	1	1	0	1	2	1	1	1	3	1	1	13.9	13.9	13.9	36.04	324	324;432;432;432;432;432	0	8.3352		By MS/MS	By MS/MS
Q3UDU4;Q564E2;Q3TI99;Q3TCI7;G5E8N5;P06151;D3Z736;D3YZQ9;Q99K20;Q3THB4;Q6NXW3;Q3UIC3	Q3UDU4;Q564E2;Q3TI99;Q3TCI7;G5E8N5;P06151;D3Z736;D3YZQ9;Q99K20;Q3THB4	3;3;3;3;3;3;2;2;2;2;1;1	2;2;2;2;2;2;1;1;1;1;1;1	2;2;2;2;2;2;1;1;1;1;1;1	L-lactate dehydrogenase;L-lactate dehydrogenase A chain	Ldha	;;;;;;;;;	12	3	2	2	0	0	3	1	1	2	3	1	1	0	0	2	1	1	1	2	0	0	0	0	2	1	1	1	2	0	0	9.4	5.8	5.8	36.265	330	330;332;332;332;361;332;237;273;315;332;104;169	0	2.4229			By MS/MS
Q6PGF7	Q6PGF7	1	1	1	Exocyst complex component 8	Exoc8		1	1	1	1	0	0	1	1	1	1	1	0	1	0	0	1	1	1	1	1	0	1	0	0	1	1	1	1	1	0	1	1.4	1.4	1.4	81.034	716	716	0.0061602	1.2341			By MS/MS
H7BWY6;Q00724;Q3TF08	H7BWY6;Q00724;Q3TF08	2;2;1	2;2;1	2;2;1	Retinol-binding protein 4	Rbp4	;;	3	2	2	2	1	1	0	1	1	1	1	2	1	1	1	0	1	1	1	1	2	1	1	1	0	1	1	1	1	2	1	11.8	11.8	11.8	28.405	245	245;201;174	0	4.4824	By MS/MS	By matching
Q9Z1R3	Q9Z1R3	1	1	1	Apolipoprotein M	Apom		1	1	1	1	1	1	0	1	1	1	1	1	1	1	1	0	1	1	1	1	1	1	1	1	0	1	1	1	1	1	1	7.9	7.9	7.9	21.273	190	190	0	12.343	By matching	By MS/MS
B2RU80	B2RU80	1	1	1	Receptor-type tyrosine-protein phosphatase beta	Ptprb		1	1	1	1	1	1	0	1	1	1	0	1	1	1	1	0	1	1	1	0	1	1	1	1	0	1	1	1	0	1	1	1.1	1.1	1.1	224.49	1998	1998	0.0061983	1.2476	By MS/MS	By MS/MS
Q64374	Q64374	2	2	2	Regucalcin	Rgn		1	2	2	2	1	1	0	1	2	2	1	1	1	1	1	0	1	2	2	1	1	1	1	1	0	1	2	2	1	1	1	9.4	9.4	9.4	33.406	299	299	0	13.924	By MS/MS	By MS/MS
B9EKB8;B7ZWC4;Q07113;Q8K0J1;Q8C2F9	B9EKB8;B7ZWC4;Q07113	3;3;3;1;1	3;3;3;1;1	3;3;3;1;1	Cation-independent mannose-6-phosphate receptor	Igf2r	;;	5	3	3	3	1	2	0	3	2	1	0	2	1	1	2	0	3	2	1	0	2	1	1	2	0	3	2	1	0	2	1	1.7	1.7	1.7	273.81	2483	2483;2483;2483;876;1282	0	19.976	By MS/MS	By MS/MS
B7ZNJ1;Q3UH17;A0A087WS56;B9EHT6;A0A087WSN6;Q3UHL6;Q3UGY5;A0A087WR50;P11276;Q3TBB4;Q3TCF1;Q3TCL7;Q3UHR1;Q4KL80;Q8R3F3;Q3UZF9;A0A087WS99;Q99KD0	B7ZNJ1;Q3UH17;A0A087WS56;B9EHT6;A0A087WSN6;Q3UHL6;Q3UGY5;A0A087WR50;P11276;Q3TBB4;Q3TCF1;Q3TCL7;Q3UHR1	8;8;8;8;8;8;8;8;8;7;7;6;6;2;2;2;1;1	8;8;8;8;8;8;8;8;8;7;7;6;6;2;2;2;1;1	8;8;8;8;8;8;8;8;8;7;7;6;6;2;2;2;1;1	Fibronectin;Anastellin	Fn1	;;;;;;;;;;;;	18	8	8	8	0	3	0	5	4	5	0	2	1	0	3	0	5	4	5	0	2	1	0	3	0	5	4	5	0	2	1	5.8	5.8	5.8	239.72	2176	2176;2266;2266;2271;2296;2361;2386;2386;2477;1832;2296;1331;1920;383;810;1055;200;216	0	53.93		By MS/MS
D3Z1S6;Q91XA9	D3Z1S6;Q91XA9	1;1	1;1	1;1	Acidic mammalian chitinase	Chia1;Chia	;	2	1	1	1	0	1	0	1	1	1	0	1	1	0	1	0	1	1	1	0	1	1	0	1	0	1	1	1	0	1	1	4.2	4.2	4.2	24.536	215	215;473	0.0097466	1.062		By MS/MS
Q80XL9;Q8BXQ8	Q80XL9;Q8BXQ8	1;1	1;1	1;1	Protein FAM53C	Fam53c	;	2	1	1	1	0	1	0	1	1	1	0	1	1	0	1	0	1	1	1	0	1	1	0	1	0	1	1	1	0	1	1	18.9	18.9	18.9	5.6035	53	53;393	0.0061856	1.2424		By MS/MS
O89067	O89067	1	1	1		Pou2f2		1	1	1	1	0	1	0	1	1	1	0	1	1	0	1	0	1	1	1	0	1	1	0	1	0	1	1	1	0	1	1	14.3	14.3	14.3	8.7129	77	77	0.0045147	1.6934		By MS/MS
Q6VEU6;P02798	Q6VEU6;P02798	1;1;1	1;1;1	1;1;1	Metallothionein;Metallothionein-2	Mt2	;;	3	1	1	1	0	1	0	1	1	1	1	0	1	0	1	0	1	1	1	1	0	1	0	1	0	1	1	1	1	0	1	19.7	19.7	19.7	6.0562	61	61;61;61	0	7.9689		By MS/MS
D3Z4N4;E9QLW5;P09535	D3Z4N4;E9QLW5;P09535	1;1;1	1;1;1	1;1;1	Insulin-like growth factor II;Insulin-like growth factor II;Preptin	Igf2	;;	3	1	1	1	0	1	0	1	1	1	0	0	1	0	1	0	1	1	1	0	0	1	0	1	0	1	1	1	0	0	1	15.5	15.5	15.5	11.107	103	103;191;180	0	4.7086		By MS/MS
Q3UN43;Q4KMV6;Q571D8;Q3U325;Q80XQ2	Q3UN43;Q4KMV6;Q571D8;Q3U325;Q80XQ2	1;1;1;1;1	1;1;1;1;1	1;1;1;1;1	TBC1 domain family member 5	Tbc1d5	;;;;	5	1	1	1	1	1	1	0	1	1	1	1	1	1	1	1	0	1	1	1	1	1	1	1	1	0	1	1	1	1	1	1.3	1.3	1.3	62.176	544	544;653;821;837;815	1	-2	By matching	By matching	By matching
Q0VDL6;Q04899	Q0VDL6;Q04899	1;1	1;1	1;1	Cyclin-dependent kinase 18	Cdk18	;	2	1	1	1	0	1	1	0	1	1	0	1	1	0	1	1	0	1	1	0	1	1	0	1	1	0	1	1	0	1	1	2	2	2	51.847	451	451;451	1	-2		By matching	By matching
B1AZS9;O08807	B1AZS9;O08807	2;2	1;1	1;1	Peroxiredoxin-4	Prdx4	;	2	2	1	1	1	0	1	0	1	2	1	0	1	0	0	0	0	1	1	0	0	0	0	0	0	0	1	1	0	0	0	8.3	4.8	4.8	26.391	229	229;274	0.0097276	1.0521	By matching		By matching
Q04447	Q04447	10	10	10	Creatine kinase B-type	Ckb		1	10	10	10	2	0	4	0	6	7	7	0	1	2	0	4	0	6	7	7	0	1	2	0	4	0	6	7	7	0	1	43.6	43.6	43.6	42.713	381	381	0	51.851	By matching		By matching
Q3TND1;P45878;Q3UND3	Q3TND1;P45878;Q3UND3	2;2;1	2;2;1	2;2;1	Peptidyl-prolyl cis-trans isomerase;Peptidyl-prolyl cis-trans isomerase FKBP2	Fkbp2	;;	3	2	2	2	1	0	1	0	2	2	2	0	1	1	0	1	0	2	2	2	0	1	1	0	1	0	2	2	2	0	1	18.6	18.6	18.6	15.344	140	140;140;140	0	11.962	By matching		By matching
Q01853;Q8BNF8	Q01853;Q8BNF8	11;9	11;9	11;9	Transitional endoplasmic reticulum ATPase	Vcp	;	2	11	11	11	0	0	2	0	4	5	5	0	1	0	0	2	0	4	5	5	0	1	0	0	2	0	4	5	5	0	1	25.3	25.3	25.3	89.321	806	806;723	0	27.817			By matching
A1L0U6;A2AS98;P28660-2;P28660	A1L0U6;A2AS98;P28660-2;P28660	1;1;1;1	1;1;1;1	1;1;1;1	Nck-associated protein 1	Nckap1	;;;	4	1	1	1	1	1	1	0	1	1	1	1	1	1	1	1	0	1	1	1	1	1	1	1	1	0	1	1	1	1	1	0.8	0.8	0.8	129.38	1133	1133;1134;1037;1128	0.0080483	1.1916	By MS/MS	By matching	By MS/MS
Q544Y7;P18760;F8WGL3;Q9CX22;Q3UHW9;P45591	Q544Y7;P18760;F8WGL3;Q9CX22	4;4;3;3;1;1	4;4;3;3;1;1	4;4;3;3;1;1	Cofilin-1	Cfl1	;;;	6	4	4	4	0	1	3	0	4	4	3	1	1	0	1	3	0	4	4	3	1	1	0	1	3	0	4	4	3	1	1	34.3	34.3	34.3	18.559	166	166;166;227;229;166;166	0	10.165		By matching	By MS/MS
Q9QXV0	Q9QXV0	6	6	6	ProSAAS;KEP;Big SAAS;Little SAAS;Big PEN-LEN;PEN;PEN-20;PEN-19;Little LEN;Big LEN	Pcsk1n		1	6	6	6	2	0	5	0	3	2	3	1	1	2	0	5	0	3	2	3	1	1	2	0	5	0	3	2	3	1	1	33.3	33.3	33.3	27.27	258	258	0	12.568	By MS/MS		By MS/MS
P08228;Q8C355	P08228	6;1	6;1	6;1	Superoxide dismutase [Cu-Zn]	Sod1		2	6	6	6	0	0	5	0	1	2	5	0	1	0	0	5	0	1	2	5	0	1	0	0	5	0	1	2	5	0	1	43.5	43.5	43.5	15.942	154	154;128	0	15.344			By MS/MS
A0A0R4J0Z1;P08003	A0A0R4J0Z1;P08003	7;7	7;7	7;7	Protein disulfide-isomerase A4	Pdia4	;	2	7	7	7	0	0	3	0	5	4	4	0	1	0	0	3	0	5	4	4	0	1	0	0	3	0	5	4	4	0	1	15.4	15.4	15.4	72.369	641	641;638	0	14.157			By MS/MS
B1B0C7;E9PZ16;Q52KG8;Q5RKM8;Q3UHH3;Q05793	B1B0C7;E9PZ16;Q52KG8;Q5RKM8;Q3UHH3;Q05793	2;2;1;1;1;1	2;2;1;1;1;1	2;2;1;1;1;1	Basement membrane-specific heparan sulfate proteoglycan core protein;Endorepellin;LG3 peptide	Hspg2	;;;;;	6	2	2	2	1	1	0	0	1	1	0	0	1	1	1	0	0	1	1	0	0	1	1	1	0	0	1	1	0	0	1	0.6	0.6	0.6	469.02	4375	4375;4383;834;1100;2672;3707	0.0023585	2.008	By matching	By matching
Q80ZP8;A8C1V1;Q3TMX5;F6USD5;F6T4L3;Q9CXI5	Q80ZP8;A8C1V1;Q3TMX5;F6USD5;F6T4L3;Q9CXI5	3;3;3;2;2;2	3;3;3;2;2;2	3;3;3;2;2;2	Mesencephalic astrocyte-derived neurotrophic factor	Manf	;;;;;	6	3	3	3	0	0	0	0	3	3	1	0	1	0	0	0	0	3	3	1	0	1	0	0	0	0	3	3	1	0	1	16.4	16.4	16.4	19.012	165	165;170;179;121;128;179	0	7.0207
Q91WD9	Q91WD9	2	2	2	Secretagogin	Scgn		1	2	2	2	0	0	0	0	1	1	2	0	1	0	0	0	0	1	1	2	0	1	0	0	0	0	1	1	2	0	1	12	12	12	32.145	276	276	0	4.5505
E0CZ27;A1L0U3;F8WI35;A1L0V4;B9EI85;P84244;P84228;P68433;P02301;E0CYN1;E0CYR7	E0CZ27;A1L0U3;F8WI35;A1L0V4;B9EI85;P84244;P84228;P68433;P02301	3;3;3;3;3;3;3;3;3;1;1	3;3;3;3;3;3;3;3;3;1;1	3;3;3;3;3;3;3;3;3;1;1	Histone H3;Histone H3.3;Histone H3.2;Histone H3.1;Histone H3.3C	H3f3a;Hist1h3e;Hist1h3i;Hist2h3b;Hist1h3b;Hist1h3a;H3f3c	;;;;;;;;	11	3	3	3	1	1	3	1	0	1	3	0	1	1	1	3	1	0	1	3	0	1	1	1	3	1	0	1	3	0	1	19.3	19.3	19.3	13.322	119	119;133;135;135;136;136;136;136;136;52;55	0	2.18	By MS/MS	By matching	By MS/MS
A0A087WNN3;Q6ZPR6-2;Q6ZPR6	A0A087WNN3;Q6ZPR6-2;Q6ZPR6	2;2;2	2;2;2	2;2;2	Inhibitor of Bruton tyrosine kinase	Ibtk	;;	3	2	2	2	2	1	1	0	0	1	1	1	1	2	1	1	0	0	1	1	1	1	2	1	1	0	0	1	1	1	1	3.4	3.4	3.4	54.675	495	495;1251;1352	1	-2	By MS/MS	By MS/MS	By matching
Q9D0A2;Q9CZP6;Q5YLW3;Q3UK56;Q3UCL7;P62908;O89068;A0A140LI77;D3YV43	Q9D0A2;Q9CZP6;Q5YLW3;Q3UK56;Q3UCL7;P62908	4;4;4;4;4;4;1;1;1	4;4;4;4;4;4;1;1;1	4;4;4;4;4;4;1;1;1	40S ribosomal protein S3	Rps3	;;;;;	9	4	4	4	0	0	2	0	0	1	3	0	1	0	0	2	0	0	1	3	0	1	0	0	2	0	0	1	3	0	1	21.8	21.8	21.8	26.64	243	243;243;243;243;243;243;123;144;191	0	2.3034			By matching
B2CY77;P14206	B2CY77;P14206	3;3	3;3	3;3	40S ribosomal protein SA	Rpsa	;	2	3	3	3	1	0	2	0	0	2	2	1	1	1	0	2	0	0	2	2	1	1	1	0	2	0	0	2	2	1	1	17.6	17.6	17.6	32.85	295	295;295	0	15.808	By matching		By MS/MS
A4FUS1;Q641N3;Q5CZY9;P14131	A4FUS1;Q641N3;Q5CZY9;P14131	1;1;1;1	1;1;1;1	1;1;1;1	40S ribosomal protein S16	Rps16	;;;	4	1	1	1	1	0	1	0	0	1	1	0	1	1	0	1	0	0	1	1	0	1	1	0	1	0	0	1	1	0	1	6.8	6.8	6.8	16.445	146	146;157;172;146	0.0065789	1.4913	By matching		By MS/MS
P08249;A0A0G2JF23;A0A0G2JGY4	P08249;A0A0G2JF23	7;4;3	7;4;3	7;4;3	Malate dehydrogenase, mitochondrial	Mdh2	;	3	7	7	7	1	0	5	0	0	1	4	0	1	1	0	5	0	0	1	4	0	1	1	0	5	0	0	1	4	0	1	26.6	26.6	26.6	35.611	338	338;199;153	0	8.6533	By MS/MS		By MS/MS
Q9JK98;Q549A5;Q06890;E9Q9B8;E9PUU2;E9PXG5;E9Q8Y5	Q9JK98;Q549A5;Q06890;E9Q9B8;E9PUU2;E9PXG5;E9Q8Y5	3;3;3;2;2;2;2	3;3;3;2;2;2;2	3;3;3;2;2;2;2	Clusterin;Clusterin;Clusterin beta chain;Clusterin alpha chain	Clu	;;;;;;	7	3	3	3	0	0	1	0	0	2	1	1	1	0	0	1	0	0	2	1	1	1	0	0	1	0	0	2	1	1	1	10.2	10.2	10.2	43.109	372	372;448;448;203;225;233;265	0	3.5578			By MS/MS
P19157;K9JA74;Q8VC73;F6RWR5;P46425	P19157;K9JA74;Q8VC73;F6RWR5;P46425	2;1;1;1;1	2;1;1;1;1	2;1;1;1;1	Glutathione S-transferase P 1;Glutathione S-transferase P 2	Gstp1;Gstp2;BC021614	;;;;	5	2	2	2	0	0	2	0	0	1	2	0	1	0	0	2	0	0	1	2	0	1	0	0	2	0	0	1	2	0	1	12.9	12.9	12.9	23.609	210	210;188;210;210;210	0	14.437			By MS/MS
P63028	P63028	2	2	2	Translationally-controlled tumor protein	Tpt1		1	2	2	2	0	0	1	0	0	1	1	0	1	0	0	1	0	0	1	1	0	1	0	0	1	0	0	1	1	0	1	15.7	15.7	15.7	19.462	172	172	0	4.6427			By MS/MS
Q3TNZ8;Q0V927;E9PYT5;Q3UHL7;E9QN70;B9EKB0;P02469	Q3TNZ8;Q0V927;E9PYT5;Q3UHL7;E9QN70;B9EKB0;P02469	1;1;1;1;1;1;1	1;1;1;1;1;1;1	1;1;1;1;1;1;1	Laminin subunit beta-1	Lamb1	;;;;;;	7	1	1	1	0	0	0	0	0	1	1	1	1	0	0	0	0	0	1	1	1	1	0	0	0	0	0	1	1	1	1	4.5	4.5	4.5	37.771	332	332;563;564;1834;1834;1834;1786	0	3.16
Q80TA9	Q80TA9	1	1	1	Ectopic P granules protein 5 homolog	Epg5		1	1	1	1	0	0	1	0	1	0	1	1	1	0	0	1	0	1	0	1	1	1	0	0	1	0	1	0	1	1	1	0.5	0.5	0.5	290.8	2572	2572	0.0080321	1.182			By MS/MS
Q920Q2	Q920Q2	1	1	1	DNA repair protein REV1	Rev1		1	1	1	1	0	1	0	1	1	0	0	0	1	0	1	0	1	1	0	0	0	1	0	1	0	1	1	0	0	0	1	1.2	1.2	1.2	137.34	1249	1249	1	-2		By MS/MS
Q8BKE0;Q9CZ58;Q3UWT6;P49722	Q8BKE0;Q9CZ58;Q3UWT6;P49722	2;2;2;2	2;2;2;2	2;2;2;2	Proteasome subunit alpha type;Proteasome subunit alpha type-2	Psma2	;;;	4	2	2	2	2	0	1	0	2	0	1	1	1	2	0	1	0	2	0	1	1	1	2	0	1	0	2	0	1	1	1	16.4	16.4	16.4	20.786	183	183;234;247;234	0	3.8612	By MS/MS		By MS/MS
Q80WS3	Q80WS3	1	1	1	rRNA/tRNA 2-O-methyltransferase fibrillarin-like protein 1	Fbll1		1	1	1	1	0	1	0	0	1	0	1	0	1	0	1	0	0	1	0	1	0	1	0	1	0	0	1	0	1	0	1	2.2	2.2	2.2	33.338	314	314	1	-2		By MS/MS
Q91Z61	Q91Z61	1	1	1	GTP-binding protein Di-Ras1	Diras1		1	1	1	1	0	0	0	0	1	0	1	1	1	0	0	0	0	1	0	1	1	1	0	0	0	0	1	0	1	1	1	5.1	5.1	5.1	22.264	198	198	0.0099404	1.142
Q5NCU4;Q5NCU5;Q3TXI6;P07214	Q5NCU4;Q5NCU5;Q3TXI6;P07214	2;2;2;2	2;2;2;2	2;2;2;2	SPARC	Sparc	;;;	4	2	2	2	0	1	1	1	0	0	1	0	1	0	1	1	1	0	0	1	0	1	0	1	1	1	0	0	1	0	1	8	8	8	34.322	301	301;302;302;302	0	7.2669		By MS/MS	By matching
Q99KE8-3;A2AQR4	Q99KE8-3;A2AQR4	1;1	1;1	1;1		Zfp64	;	2	1	1	1	0	1	1	1	0	0	1	0	1	0	1	1	1	0	0	1	0	1	0	1	1	1	0	0	1	0	1	2.7	2.7	2.7	53.316	473	473;676	0	2.7051		By MS/MS	By matching
Q3V0F6	Q3V0F6	2	2	2		Gm7337		1	2	2	2	1	0	1	1	0	0	1	1	1	1	0	1	1	0	0	1	1	1	1	0	1	1	0	0	1	1	1	9.9	9.9	9.9	44.925	385	385	1	-2	By matching		By matching
Q8R593	Q8R593	1	1	1		Rchy1		1	1	1	1	1	1	0	1	0	0	0	1	1	1	1	0	1	0	0	0	1	1	1	1	0	1	0	0	0	1	1	3.8	3.8	3.8	29.988	261	261	0.0060852	1.2024	By matching	By MS/MS
E9Q8N1;E9Q8K5;A2ASS6-2;A2ASS6	E9Q8N1;E9Q8K5;A2ASS6-2;A2ASS6	2;2;2;2	1;1;1;1	1;1;1;1	Titin	Ttn	;;;	4	2	1	1	0	1	0	1	0	0	0	1	1	0	1	0	1	0	0	0	1	0	0	1	0	1	0	0	0	1	0	0.1	0	0	3716	33467	33467;33467;26886;35213	1	-2		By MS/MS
Q3UNQ4;Q3U0K4;E9QNW6;Q8VDG7	Q3UNQ4;Q3U0K4;E9QNW6;Q8VDG7	1;1;1;1	1;1;1;1	1;1;1;1	Platelet-activating factor acetylhydrolase 2, cytoplasmic	Pafah2	;;;	4	1	1	1	0	0	0	1	0	0	0	0	1	0	0	0	1	0	0	0	0	1	0	0	0	1	0	0	0	0	1	2.8	2.8	2.8	43.455	390	390;390;415;390	1	-2
Q3UN37;B2RVF4;H3BKF1;E9PYM1;E9Q0Z5;D3YWC7	Q3UN37;B2RVF4;H3BKF1;E9PYM1;E9Q0Z5;D3YWC7	1;1;1;1;1;1	1;1;1;1;1;1	1;1;1;1;1;1		Fam47e	;;;;;	6	1	1	1	1	0	1	0	0	0	1	1	1	1	0	1	0	0	0	1	1	1	1	0	1	0	0	0	1	1	1	9.9	9.9	9.9	11.797	101	101;101;121;199;260;402	1	-2	By MS/MS		By matching
G3X9K3	G3X9K3	1	1	1	Brefeldin A-inhibited guanine nucleotide-exchange protein 1	Arfgef1		1	1	1	1	1	0	1	0	0	0	1	1	1	1	0	1	0	0	0	1	1	1	1	0	1	0	0	0	1	1	1	0.8	0.8	0.8	208.5	1846	1846	1	-2	By MS/MS		By matching
G3UWN9;G3UXY0;G3X9K9;G3UXZ5;Q5HZK3;P97371	G3UWN9;G3UXY0;G3X9K9;G3UXZ5;Q5HZK3;P97371	1;1;1;1;1;1	1;1;1;1;1;1	1;1;1;1;1;1	Proteasome activator complex subunit 1	Psme1	;;;;;	6	1	1	1	0	0	1	0	0	0	1	1	1	0	0	1	0	0	0	1	1	1	0	0	1	0	0	0	1	1	1	6.9	6.9	6.9	19.774	173	173;226;236;238;249;249	0.009901	1.1311			By matching
Q3TGB1;Q9CQ26	Q3TGB1;Q9CQ26	1;1	1;1	1;1	STAM-binding protein	Stambp	;	2	1	1	1	0	0	1	0	0	0	1	1	1	0	0	1	0	0	0	1	1	1	0	0	1	0	0	0	1	1	1	3.3	3.3	3.3	48.553	424	424;424	1	-2			By matching
D3Z6F5;Q03265;Q3U452;D6RJ16	D3Z6F5;Q03265	7;7;3;1	7;7;3;1	7;7;3;1	ATP synthase subunit alpha;ATP synthase subunit alpha, mitochondrial	Atp5a1	;	4	7	7	7	0	0	3	0	0	0	7	0	1	0	0	3	0	0	0	7	0	1	0	0	3	0	0	0	7	0	1	15.7	15.7	15.7	54.594	503	503;553;509;89	0	16.618			By matching
K3W4N7;A0A0R4J1M7;Q9JJV9-2;Q9JJV9	K3W4N7;A0A0R4J1M7;Q9JJV9-2;Q9JJV9	1;1;1;1	1;1;1;1	1;1;1;1	Sodium channel protein;Sodium channel protein type 5 subunit alpha	Scn5a	;;;	4	1	1	1	0	0	1	0	0	0	1	0	1	0	0	1	0	0	0	1	0	1	0	0	1	0	0	0	1	0	1	0.9	0.9	0.9	227.7	2020	2020;2020;2019;2019	1	-2			By matching
A0A097PUD0;A0A097PUG4	A0A097PUD0;A0A097PUG4	4;4	4;4	4;4			;	2	4	4	4	1	0	4	0	0	0	4	1	1	1	0	4	0	0	0	4	1	1	1	0	4	0	0	0	4	1	1	29.4	29.4	29.4	25.616	235	235;238	0	58.592	By matching		By MS/MS
Q8R016;E9PY26	Q8R016;E9PY26	2;1	2;1	2;1	Bleomycin hydrolase	Blmh	;	2	2	2	2	1	0	2	0	0	0	1	2	1	1	0	2	0	0	0	1	2	1	1	0	2	0	0	0	1	2	1	5.3	5.3	5.3	52.511	455	455;179	0	8.9551	By matching		By MS/MS
A0A0R4J293;Q9JLF6	A0A0R4J293;Q9JLF6	3;3	3;3	3;3	Protein-glutamine gamma-glutamyltransferase K	Tgm1	;	2	3	3	3	1	0	3	0	0	0	2	1	1	1	0	3	0	0	0	2	1	1	1	0	3	0	0	0	2	1	1	4	4	4	89.795	815	815;815	0.0065076	1.3994	By matching		By MS/MS
Q80U29;Q3TAJ6;B1AR52;F7DC70;B1AR51;P58854	Q80U29;Q3TAJ6;B1AR52;F7DC70;B1AR51;P58854	2;1;1;1;1;1	2;1;1;1;1;1	2;1;1;1;1;1	Gamma-tubulin complex component 3	mKIAA0357;Tubgcp3;Dnahc9;Dnah9	;;;;;	6	2	2	2	1	0	2	0	0	0	2	2	1	1	0	2	0	0	0	2	2	1	1	0	2	0	0	0	2	2	1	1	1	1	169.04	1471	1471;905;1957;1958;4484;905	1	-2	By matching		By MS/MS
Q545V6;P60041	Q545V6;P60041	2;2	2;2	2;2	Somatostatin;Antrin;Somatostatin-28;Somatostatin-14	Sst	;	2	2	2	2	1	0	2	0	0	0	2	0	1	1	0	2	0	0	0	2	0	1	1	0	2	0	0	0	2	0	1	16.4	16.4	16.4	12.745	116	116;116	0	2.4777	By matching		By MS/MS
Q8C2K0;Q5BLK0;Q3TIQ2;P35979;Q6DI58	Q8C2K0;Q5BLK0;Q3TIQ2;P35979;Q6DI58	3;3;3;3;2	3;3;3;3;2	3;3;3;3;2	60S ribosomal protein L12	Rpl12	;;;;	5	3	3	3	1	0	3	0	0	0	3	0	1	1	0	3	0	0	0	3	0	1	1	0	3	0	0	0	3	0	1	25	25	25	17.806	164	164;165;165;165;218	0	6.6165	By matching		By MS/MS
Q0QEW9;Q642K1;Q58EW0;P35980;G3UZJ6;G3UZK4	Q0QEW9;Q642K1;Q58EW0;P35980;G3UZJ6;G3UZK4	2;2;2;2;1;1	2;2;2;2;1;1	2;2;2;2;1;1	60S ribosomal protein L18	Rpl18	;;;;;	6	2	2	2	1	0	2	0	0	0	2	1	1	1	0	2	0	0	0	2	1	1	1	0	2	0	0	0	2	1	1	14.2	14.2	14.2	19.231	169	169;188;188;188;126;136	0.0045351	1.7891	By matching		By MS/MS
F7A6H4;E9Q555	F7A6H4;E9Q555	2;2	2;2	2;2	E3 ubiquitin-protein ligase RNF213	Rnf213	;	2	2	2	2	1	0	1	0	0	0	2	1	1	1	0	1	0	0	0	2	1	1	1	0	1	0	0	0	2	1	1	0.6	0.6	0.6	584.78	5152	5152;5152	1	-2	By MS/MS		By MS/MS
Q542G9;P07356;Q3UCD3;Q9CZI7;B0V2N7;B0V2N8;Q99KH3;B0V2N5	Q542G9;P07356;Q3UCD3;Q9CZI7;B0V2N7;B0V2N8;Q99KH3;B0V2N5	11;11;10;10;8;7;7;6	11;11;10;10;8;7;7;6	11;11;10;10;8;7;7;6	Annexin;Annexin A2	Anxa2	;;;;;;;	8	11	11	11	2	0	10	0	0	0	10	1	1	2	0	10	0	0	0	10	1	1	2	0	10	0	0	0	10	1	1	36.6	36.6	36.6	38.676	339	339;339;339;339;196;176;222;272	0	40.911	By MS/MS		By MS/MS
F6UFG6;D3YYE1;D3Z7M9;Q64G17;O35381	F6UFG6;D3YYE1;D3Z7M9;Q64G17;O35381	3;3;3;3;3	3;3;3;3;3	3;3;3;3;3	Putative acidic leucine-rich nuclear phosphoprotein 32 family member C;Acidic leucine-rich nuclear phosphoprotein 32 family member A	Anp32a;Anp32c	;;;;	5	3	3	3	1	0	3	0	0	0	3	1	1	1	0	3	0	0	0	3	1	1	1	0	3	0	0	0	3	1	1	15.2	15.2	15.2	15.306	138	138;198;233;123;247	0	2.5859	By MS/MS		By MS/MS
Q545J0;Q08731;A0A0N4SVN9	Q545J0;Q08731	4;4;1	4;4;1	4;4;1	Lithostathine-2	Reg2	;	3	4	4	4	0	0	4	0	0	0	2	2	1	0	0	4	0	0	0	2	2	1	0	0	4	0	0	0	2	2	1	26	26	26	19.407	173	173;173;132	0.0066372	1.5151			By MS/MS
Q3TWM9;Q3UAS4;Q3UE29;E9PZ00;Q3TXJ0;Q8BFQ1;Q3U8C4;Q3U897;Q3U825;Q3U5W2;Q3TXP9;Q3TWL8;Q3TWF9;Q3TWE9;Q3TKK3;Q3TKB2;Q3TIT5;Q3TID4;K3W4L3;B2RUD7;Q3UFE8;J3QPG5;Q61207	Q3TWM9;Q3UAS4;Q3UE29;E9PZ00;Q3TXJ0;Q8BFQ1;Q3U8C4;Q3U897;Q3U825;Q3U5W2;Q3TXP9;Q3TWL8;Q3TWF9;Q3TWE9;Q3TKK3;Q3TKB2;Q3TIT5;Q3TID4;K3W4L3;B2RUD7;Q3UFE8;J3QPG5;Q61207	2;2;2;2;2;2;2;2;2;2;2;2;2;2;2;2;2;2;2;2;2;2;2	2;2;2;2;2;2;2;2;2;2;2;2;2;2;2;2;2;2;2;2;2;2;2	2;2;2;2;2;2;2;2;2;2;2;2;2;2;2;2;2;2;2;2;2;2;2	Prosaposin	Psap	;;;;;;;;;;;;;;;;;;;;;;	23	2	2	2	0	0	2	0	0	0	2	0	1	0	0	2	0	0	0	2	0	1	0	0	2	0	0	0	2	0	1	3.8	3.8	3.8	58.298	527	527;545;551;551;553;554;554;554;554;554;554;554;554;554;554;554;554;554;556;556;557;557;557	0.0045249	1.704			By MS/MS
P05202	P05202	5	5	5	Aspartate aminotransferase, mitochondrial	Got2		1	5	5	5	0	0	4	0	0	0	5	0	1	0	0	4	0	0	0	5	0	1	0	0	4	0	0	0	5	0	1	16	16	16	47.411	430	430	0	14.884			By MS/MS
B2RQH0;Q61495;Q7TSF1;Q7TSF0;Q9CUH7;Q7TSF0-2	B2RQH0;Q61495;Q7TSF1;Q7TSF0;Q9CUH7	4;4;4;3;2;1	4;4;4;3;2;1	4;4;4;3;2;1	Desmoglein-1-alpha;Desmoglein-1-beta;Desmoglein-1-gamma	Dsg1b;Dsg1a;Dsg1c	;;;;	6	4	4	4	0	0	3	0	0	0	4	3	1	0	0	3	0	0	0	4	3	1	0	0	3	0	0	0	4	3	1	3.7	3.7	3.7	114.45	1060	1060;1057;1060;911;353;427	0	4.6122			By MS/MS
Q91VR8	Q91VR8	1	1	1	Protein BRICK1	Brk1		1	1	1	1	0	1	0	0	0	0	1	1	1	0	1	0	0	0	0	1	1	1	0	1	0	0	0	0	1	1	1	9.3	9.3	9.3	8.7608	75	75	0	3.0632		By MS/MS
D3YUM9;D3YZ69;Q3UHD3-4;Q3UHD3-3;Q3UHD3	D3YUM9;D3YZ69;Q3UHD3-4;Q3UHD3-3;Q3UHD3	1;1;1;1;1	1;1;1;1;1	1;1;1;1;1	Microtubule-associated tumor suppressor candidate 2 homolog	Mtus2	;;;;	5	1	1	1	1	0	0	0	0	0	0	0	1	1	0	0	0	0	0	0	0	1	1	0	0	0	0	0	0	0	1	11.8	11.8	11.8	19.725	170	170;315;152;348;1353	1	-2	By MS/MS
Q69ZV6;Q810B7-2;Q810B7	Q69ZV6;Q810B7-2;Q810B7	1;1;1	1;1;1	1;1;1	SLIT and NTRK-like protein 5	Slitrk5	;;	3	1	1	1	1	0	0	0	0	0	0	0	1	1	0	0	0	0	0	0	0	1	1	0	0	0	0	0	0	0	1	1.2	1.2	1.2	94.011	839	839;755;957	1	-2	By MS/MS
E9Q9S3;B2RUE3;Q6EJB6	E9Q9S3;B2RUE3;Q6EJB6	1;1;1	1;1;1	1;1;1	U3 small nucleolar RNA-associated protein 14 homolog B	Utp14b	;;	3	1	1	1	0	0	0	0	0	0	0	0	1	0	0	0	0	0	0	0	0	1	0	0	0	0	0	0	0	0	1	1.9	1.9	1.9	88.636	780	780;780;756	1	-2
Q54AH9;Q549D9;A8DV59;A8DV41;P02089;Q9QUN8;D0U293	Q54AH9;Q549D9;A8DV59;A8DV41;P02089;Q9QUN8;D0U293	7;7;7;7;7;6;6	3;3;3;3;3;2;2	3;3;3;3;3;2;2	Hemoglobin subunit beta-2	Hbb-b2;Hbbt2	;;;;;;	7	7	3	3	2	2	7	2	3	2	5	2	2	0	0	3	0	0	0	1	0	0	0	0	3	0	0	0	1	0	0	58.9	28.8	28.8	15.747	146	146;147;147;147;147;146;147	0	2.4712	By matching	By matching	By MS/MS
Q9JJ20;O70456	Q9JJ20;O70456	3;3	1;1	1;1	14-3-3 protein sigma	Sfn	;	2	3	1	1	2	1	3	1	1	1	3	2	2	0	0	1	0	0	0	1	1	1	0	0	1	0	0	0	1	1	1	10.5	3.2	3.2	27.833	248	248;248	0.008	1.1659	By matching	By matching	By MS/MS
Q9CY10;Q91VB8;Q8BPF4;A8DUV3;P01942;Q9QWJ3;Q9CY06;Q9CWS5;Q61287;A8DUV1;Q61649;Q78PA4;A7M7S6;P06467	Q9CY10;Q91VB8;Q8BPF4;A8DUV3;P01942;Q9QWJ3;Q9CY06;Q9CWS5;Q61287;A8DUV1;Q61649	6;6;6;6;6;5;5;5;5;5;3;1;1;1	4;4;4;4;4;3;3;3;3;3;3;0;0;0	4;4;4;4;4;3;3;3;3;3;3;0;0;0	Hemoglobin subunit alpha	haemaglobin alpha 2;Hbat1;Hba	;;;;;;;;;;	14	6	4	4	2	3	5	2	2	2	3	1	2	1	1	4	0	0	1	2	0	1	1	1	4	0	0	1	2	0	1	43	36.6	36.6	15.202	142	142;142;142;142;142;122;142;142;142;142;58;142;156;142	0	10.476	By MS/MS	By matching	By MS/MS
A6BLY7	A6BLY7	3	1	1	Keratin, type I cytoskeletal 28	Krt28		1	3	1	1	2	2	3	2	2	2	3	2	2	1	1	1	1	1	1	1	1	1	1	1	1	1	1	1	1	1	1	5	1.9	1.9	50.346	462	462	0.0045662	1.8039	By MS/MS	By MS/MS	By MS/MS
Q4FJS7;Q3TBR2;Q3TDB9;Q3U3V1;O88947	Q4FJS7;Q3TBR2;Q3TDB9;Q3U3V1;O88947	2;2;2;2;2	2;2;2;2;2	2;2;2;2;2	Coagulation factor X;Factor X light chain;Factor X heavy chain;Activated factor Xa heavy chain	F10	;;;;	5	2	2	2	1	1	0	1	1	2	0	0	2	1	1	0	1	1	2	0	0	2	1	1	0	1	1	2	0	0	2	3.7	3.7	3.7	54.003	481	481;481;492;493;481	0	2.2891	By MS/MS	By MS/MS
A0A0A6YWU2;E9Q589;A0A0A6YY47;E9QB01;P13595-4;P13595-3;P13595-2;P13595;A0A0A6YY91	A0A0A6YWU2;E9Q589;A0A0A6YY47;E9QB01;P13595-4;P13595-3;P13595-2;P13595;A0A0A6YY91	3;3;3;3;3;3;3;3;2	3;3;3;3;3;3;3;3;2	3;3;3;3;3;3;3;3;2	Neural cell adhesion molecule 1	Ncam1	;;;;;;;;	9	3	3	3	1	1	0	1	2	1	0	1	2	1	1	0	1	2	1	0	1	2	1	1	0	1	2	1	0	1	2	7.3	7.3	7.3	67.305	605	605;725;848;849;605;725;848;1115;1089	0	5.6582	By MS/MS	By MS/MS
Q9DCY1;P24369;Q6ZQM2	Q9DCY1;P24369	6;6;2	6;6;2	6;6;2	Peptidyl-prolyl cis-trans isomerase;Peptidyl-prolyl cis-trans isomerase B	Ppib	;	3	6	6	6	0	1	4	0	1	1	3	2	2	0	1	4	0	1	1	3	2	2	0	1	4	0	1	1	3	2	2	25	25	25	23.713	216	216;216;142	0	7.1663		By MS/MS	By MS/MS
Q3UUX9;Q3TIY6;Q3UC72;Q3UPA3;Q61598-2;Q61598;Q9CZ18	Q3UUX9;Q3TIY6;Q3UC72;Q3UPA3;Q61598-2;Q61598	9;9;9;9;9;9;3	5;5;5;5;5;5;1	5;5;5;5;5;5;1	Rab GDP dissociation inhibitor beta	Gdi2	;;;;;	7	9	5	5	1	0	5	0	5	2	7	2	2	1	0	3	0	2	1	4	2	2	1	0	3	0	2	1	4	2	2	25.4	12.6	12.6	50.507	445	445;445;509;512;409;445;230	0	9.5911	By matching		By matching
Q3TLL6;Q4FZL1;Q5F2A7;Q3UXC2;Q3TGK7;Q3TFG3;P60843;Q3TSJ4;Q78WR5;Q3U8I0;Q8BTU6;Q52KC1;P10630;P10630-2;E9Q561	Q3TLL6;Q4FZL1;Q5F2A7;Q3UXC2;Q3TGK7;Q3TFG3;P60843;Q3TSJ4;Q78WR5;Q3U8I0;Q8BTU6;Q52KC1;P10630;P10630-2;E9Q561	4;4;4;4;4;4;4;3;3;3;3;3;3;3;2	4;4;4;4;4;4;4;3;3;3;3;3;3;3;2	4;4;4;4;4;4;4;3;3;3;3;3;3;3;2	Eukaryotic initiation factor 4A-I;Eukaryotic initiation factor 4A-II;Eukaryotic initiation factor 4A-II, N-terminally processed	Eif4a1;Eif4a2	;;;;;;;;;;;;;;	15	4	4	4	1	0	2	0	1	1	4	2	2	1	0	2	0	1	1	4	2	2	1	0	2	0	1	1	4	2	2	14.3	14.3	14.3	41.49	364	364;405;406;406;406;406;406;225;236;286;362;407;407;408;312	0	9.3588	By matching		By MS/MS
A2A5N2;Q9CQV8-2;Q9CQV8;A2A5N1	A2A5N2;Q9CQV8-2;Q9CQV8;A2A5N1	4;4;4;2	1;1;1;1	1;1;1;1	14-3-3 protein beta/alpha;14-3-3 protein beta/alpha, N-terminally processed	Ywhab	;;;	4	4	1	1	3	2	3	1	3	3	3	2	2	0	0	0	0	1	1	0	0	0	0	0	0	0	1	1	0	0	0	16.7	5.7	5.7	28.086	246	246;244;246;159	0	23.258	By matching	By matching	By matching
A3KML3;F6YY69;F6VW30;P68254-2;P68254	A3KML3;F6YY69;F6VW30;P68254-2;P68254	7;7;7;7;7	4;4;4;4;4	4;4;4;4;4	14-3-3 protein theta	Ywhaq	;;;;	5	7	4	4	3	3	3	1	3	5	6	2	2	0	1	0	0	1	3	3	0	0	0	1	0	0	1	3	3	0	0	36.3	25.3	25.3	27.778	245	245;285;303;243;245	0	55.688	By matching	By matching	By matching
Q3TED3;Q3V117;Q91V92;Q3UEA1;Q8VDM8;Q3UVY4;Q3TS02;Q99K05;Q6P063	Q3TED3;Q3V117;Q91V92;Q3UEA1;Q8VDM8	33;33;33;30;19;12;12;7;3	33;33;33;30;19;12;12;7;3	33;33;33;30;19;12;12;7;3	ATP-citrate synthase	Acly	;;;;	9	33	33	33	6	3	7	1	24	25	19	2	2	6	3	7	1	24	25	19	2	2	6	3	7	1	24	25	19	2	2	40.1	40.1	40.1	119.62	1091	1091;1101;1091;1034;592;436;491;195;117	0	126.78	By MS/MS	By matching	By matching
P99024;Q80ZV2	P99024	13;5	4;1	3;1	Tubulin beta-5 chain	Tubb5		2	13	4	3	1	5	5	4	9	9	7	2	2	0	1	2	2	2	3	2	0	0	0	1	1	2	1	2	1	0	0	45.7	15.5	12.2	49.67	444	444;186	0	4.6421	By matching	By matching	By MS/MS
Q53ZU7;O08709;Q6GT24;D3Z0Y2;Q6A0D0;Q8BPD3;Q8BG37;A0A0A6YXQ7	Q53ZU7;O08709;Q6GT24;D3Z0Y2;Q6A0D0;Q8BPD3	8;8;7;6;6;5;2;1	8;8;7;6;6;5;2;1	8;8;7;6;6;5;2;1	Peroxiredoxin-6	Prdx6	;;;;;	8	8	8	8	3	1	4	1	4	3	4	2	2	3	1	4	1	4	3	4	2	2	3	1	4	1	4	3	4	2	2	47.3	47.3	47.3	24.87	224	224;224;224;200;227;178;224;76	0	37.972	By matching	By matching	By MS/MS
Q5NC82;E9PZF0;Q01768;B0LAA8;Q8R4B4;Q5NC80;Q5NC79	Q5NC82;E9PZF0;Q01768;B0LAA8;Q8R4B4	9;9;9;8;6;4;2	9;9;9;8;6;4;2	5;5;5;4;2;0;0	Nucleoside diphosphate kinase;Nucleoside diphosphate kinase B	Nme2;Gm20390	;;;;	7	9	9	5	2	2	5	1	6	5	6	2	2	2	2	5	1	6	5	6	2	2	1	1	1	0	3	2	2	0	0	74.3	74.3	44.1	17.363	152	152;267;152;144;365;127;117	0	35.129	By matching	By matching	By MS/MS
Q80Y52;Q3UIF3;Q3TKA2;P07901;Q3TJU7;A0PJ91;Q3TKB9;Q8C5U3;Q3TKG0;Q8C2A9;B7ZC50;A2A6A2;B7ZC49	Q80Y52;Q3UIF3;Q3TKA2;P07901;Q3TJU7;A0PJ91;Q3TKB9;Q8C5U3;Q3TKG0	14;14;14;14;12;12;11;11;11;4;3;1;1	9;9;9;9;9;7;7;7;7;1;0;0;0	9;9;9;9;9;7;7;7;7;1;0;0;0	Heat shock protein HSP 90-alpha	Hsp90aa1	;;;;;;;;	13	14	9	9	3	5	7	4	8	8	9	1	2	1	3	3	2	5	5	5	0	0	1	3	3	2	5	5	5	0	0	23.1	15.3	15.3	84.787	733	733;733;733;733;556;565;556;557;557;274;201;98;103	0	70.79	By matching	By MS/MS	By matching
A0A0A0MQA5;P68368;A0A087WRB4;A0A087WQS4;A0A087WSB0;A0A087WSL5;A0A087WS35	A0A0A0MQA5;P68368	16;16;5;5;3;3;1	3;3;2;2;2;2;1	3;3;2;2;2;2;1	Tubulin alpha-4A chain	Tuba4a	;	7	16	3	3	5	5	7	7	6	13	10	5	2	1	2	1	2	2	2	1	2	1	1	2	1	2	2	2	1	2	1	45.7	9.4	9.4	52.793	477	477;448;100;125;81;89;75	0	8.7483	By MS/MS	By MS/MS	By matching
Q04857;B0LAD9;Q99LW4;Q8C6Y0	Q04857;B0LAD9;Q99LW4	3;2;2;1	3;2;2;1	3;2;2;1	Collagen alpha-1(VI) chain	Col6a1	;;	4	3	3	3	2	1	1	1	2	2	1	2	2	2	1	1	1	2	2	1	2	2	2	1	1	1	2	2	1	2	2	3.5	3.5	3.5	108.49	1025	1025;165;406;266	0	9.6509	By MS/MS	By MS/MS	By matching
Q545I7;P01325	Q545I7;P01325	5;5	4;4	4;4	Insulin-1;Insulin-1 B chain;Insulin-1 A chain	Ins1	;	2	5	4	4	3	1	2	2	4	3	3	2	2	2	1	1	2	4	2	2	1	1	2	1	1	2	4	2	2	1	1	70.4	50.9	50.9	12.16	108	108;108	0	41.497	By MS/MS	By matching	By MS/MS
Q5FW97;P17182;Q6PHC1;Q8CF78;B0QZL1;B1ARR7	Q5FW97;P17182;Q6PHC1;Q8CF78;B0QZL1	15;15;11;9;8;6	15;15;11;9;8;6	13;13;11;7;6;4	Alpha-enolase;Enolase	EG433182;Eno1	;;;;	6	15	15	13	3	3	8	4	9	9	9	5	2	3	3	8	4	9	9	9	5	2	2	2	6	3	8	8	7	4	2	48.2	48.2	41	47.14	434	434;434;366;321;221;119	0	49.776	By MS/MS	By matching	By MS/MS
A0JLV3;B2RVD5;B2RTK3;Q8CBB6;Q921L4;Q8CGP2;Q8CGP1;Q6ZWY9;Q64525;Q64478;Q64475;P10854;P10853;Q8CGP2-2;A0JNS9;Q9D2U9;Q8CGP0;Q64524;P70696;Q8VEE3;G3X9D5	A0JLV3;B2RVD5;B2RTK3;Q8CBB6;Q921L4;Q8CGP2;Q8CGP1;Q6ZWY9;Q64525;Q64478;Q64475;P10854;P10853;Q8CGP2-2;A0JNS9;Q9D2U9;Q8CGP0;Q64524;P70696;Q8VEE3;G3X9D5	4;4;4;4;4;4;4;4;4;4;4;4;4;4;3;3;3;3;3;2;2	4;4;4;4;4;4;4;4;4;4;4;4;4;4;3;3;3;3;3;2;2	4;4;4;4;4;4;4;4;4;4;4;4;4;4;3;3;3;3;3;2;2	Histone H2B;Histone H2B type 1-P;Histone H2B type 1-K;Histone H2B type 1-C/E/G;Histone H2B type 2-B;Histone H2B type 1-H;Histone H2B type 1-B;Histone H2B type 1-M;Histone H2B type 1-F/J/L;Histone H2B type 3-A;Histone H2B type 3-B;Histone H2B type 2-E;Histone H2B type 1-A	Hist1h2bj;Hist1h2bk;Hist1h2bm;Hist1h2br;LOC665622;Hist1h2bp;Hist1h2bc;Hist2h2bb;Hist1h2bh;Hist1h2bb;Hist1h2bf;Hist1h2ba;Hist3h2ba;Hist3h2bb;Hist2h2be	;;;;;;;;;;;;;;;;;;;;	21	4	4	4	2	2	3	2	4	3	3	3	2	2	2	3	2	4	3	3	3	2	2	2	3	2	4	3	3	3	2	34.1	34.1	34.1	13.579	123	123;126;126;134;135;126;126;126;126;126;126;126;126;138;127;126;126;126;127;120;120	0	10.048	By MS/MS	By matching	By MS/MS
Q5M9K1;P07309;Q9D6A4	Q5M9K1;P07309;Q9D6A4	4;4;3	4;4;3	4;4;3	Transthyretin	Ttr	;;	3	4	4	4	2	0	3	1	2	3	3	1	2	2	0	3	1	2	3	3	1	2	2	0	3	1	2	3	3	1	2	39.5	39.5	39.5	15.776	147	147;147;147	0	68.216	By MS/MS		By MS/MS
P55095;A2AS86	P55095;A2AS86	7;6	7;6	7;6	Glucagon;Glicentin;Glicentin-related polypeptide;Oxyntomodulin;Glucagon;Glucagon-like peptide 1;Glucagon-like peptide 1(7-37);Glucagon-like peptide 1(7-36);Glucagon-like peptide 2	Gcg	;	2	7	7	7	5	0	5	3	5	6	4	3	2	5	0	5	3	5	6	4	3	2	5	0	5	3	5	6	4	3	2	47.2	47.2	47.2	20.906	180	180;173	0	267.68	By MS/MS		By MS/MS
Q64727;Q3TEB0	Q64727	16;1	16;1	16;1	Vinculin	Vcl		2	16	16	16	2	9	0	9	5	4	2	4	2	2	9	0	9	5	4	2	4	2	2	9	0	9	5	4	2	4	2	23.7	23.7	23.7	116.72	1066	1066;379	0	100.86	By matching	By MS/MS
E9Q1Y3;E9Q414	E9Q1Y3;E9Q414	5;5	3;3	3;3	Apolipoprotein B-100;Apolipoprotein B-48	Apob	;	2	5	3	3	2	5	0	4	5	5	2	2	2	1	3	0	2	3	3	2	1	1	1	3	0	2	3	3	2	1	1	1.1	0.7	0.7	503.9	4456	4456;4505	0	10.668	By MS/MS	By MS/MS
Q9JKR6;Q8VCI2;F6TRP3;E0CYZ2	Q9JKR6	15;7;3;2	15;7;3;2	15;7;3;2	Hypoxia up-regulated protein 1	Hyou1		4	15	15	15	1	1	4	0	5	2	12	0	2	1	1	4	0	5	2	12	0	2	1	1	4	0	5	2	12	0	2	23.3	23.3	23.3	111.18	999	999;504;227;172	0	26.279	By MS/MS	By matching	By matching
P61458	P61458	2	2	2	Pterin-4-alpha-carbinolamine dehydratase	Pcbd1		1	2	2	2	0	0	1	0	2	2	2	0	2	0	0	1	0	2	2	2	0	2	0	0	1	0	2	2	2	0	2	17.3	17.3	17.3	11.985	104	104	0	3.0283			By matching
P56480	P56480	10	10	10	ATP synthase subunit beta, mitochondrial	Atp5b		1	10	10	10	3	1	7	0	3	3	9	0	2	3	1	7	0	3	3	9	0	2	3	1	7	0	3	3	9	0	2	27.8	27.8	27.8	56.3	529	529	0	25.124	By matching	By matching	By MS/MS
P52480;Q3UEH4;E9Q509;Q3UEI4;A7MCU9;G3X925;P53657	P52480	18;1;1;1;1;1;1	18;1;1;1;1;1;1	2;0;0;0;0;0;0	Pyruvate kinase PKM	Pkm		7	18	18	2	6	0	13	0	9	11	16	1	2	6	0	13	0	9	11	16	1	2	1	0	2	0	0	1	2	0	1	45.2	45.2	6.2	57.844	531	531;543;543;546;570;574;574	0	192.88	By MS/MS		By MS/MS
B2MWM9;P14211;Q3UWP8;Q62041	B2MWM9;P14211;Q3UWP8	12;12;11;1	12;12;11;1	12;12;11;1	Calreticulin	Calr	;;	4	12	12	12	4	0	9	0	9	6	11	3	2	4	0	9	0	9	6	11	3	2	4	0	9	0	9	6	11	3	2	45.9	45.9	45.9	47.994	416	416;416;368;178	0	68.832	By MS/MS		By MS/MS
A5JUZ1;A0A0A6YW67;E9Q9J0;Q66JP1;Q8C2K3;Q642L7;E9Q4P0;E9Q5F6;Q922B0;E9QNP0;Q5SX22;Q3TH47;Q78XY9;Q6NZC5;Q8R0Z9;Q922Z8;Q8VC46;P62984;P62983;P0CG49;P0CG50;B0LAC2;J3QK04;D3YYZ2	A5JUZ1;A0A0A6YW67;E9Q9J0;Q66JP1;Q8C2K3;Q642L7;E9Q4P0;E9Q5F6;Q922B0;E9QNP0;Q5SX22;Q3TH47;Q78XY9;Q6NZC5;Q8R0Z9;Q922Z8;Q8VC46;P62984;P62983;P0CG49;P0CG50;B0LAC2;J3QK04	3;3;3;3;3;3;3;3;3;3;3;3;3;3;3;3;3;3;3;3;3;2;2;1	3;3;3;3;3;3;3;3;3;3;3;3;3;3;3;3;3;3;3;3;3;2;2;1	3;3;3;3;3;3;3;3;3;3;3;3;3;3;3;3;3;3;3;3;3;2;2;1	Ubiquitin-60S ribosomal protein L40;Ubiquitin;60S ribosomal protein L40;Ubiquitin-40S ribosomal protein S27a;Ubiquitin;40S ribosomal protein S27a;Polyubiquitin-B;Ubiquitin;Polyubiquitin-C;Ubiquitin;Ubiquitin-related 1;Ubiquitin-related 2	Ubc;Gm8797;Uba52;Gm1821;Rps27a;Kxd1;Ubb;Gm7808	;;;;;;;;;;;;;;;;;;;;;;	24	3	3	3	3	0	3	0	1	1	3	3	2	3	0	3	0	1	1	3	3	2	3	0	3	0	1	1	3	3	2	44.7	44.7	44.7	8.5647	76	76;77;96;128;153;156;193;201;202;232;236;278;305;305;354;582;658;128;156;305;734;71;128;122	0	12.128	By MS/MS		By MS/MS
Q14DR9;Q8R2E9	Q14DR9;Q8R2E9	10;10	10;10	9;9	ERO1-like protein beta	Ero1lb	;	2	10	10	9	4	0	9	0	4	2	7	0	2	4	0	9	0	4	2	7	0	2	4	0	8	0	4	2	6	0	2	25.7	25.7	23.3	53.518	467	467;467	0	25.403	By MS/MS		By MS/MS
P28481-2;P28481-7;P28481-6;P28481-5;P28481-4;P28481-1;P28481	P28481-2;P28481-7;P28481-6;P28481-5;P28481-4;P28481-1;P28481	4;4;4;4;4;4;4	4;4;4;4;4;4;4	4;4;4;4;4;4;4	Collagen alpha-1(II) chain;Collagen alpha-1(II) chain;Chondrocalcin	Col2a1	;;;;;;	7	4	4	4	0	0	0	0	1	2	0	2	2	0	0	0	0	1	2	0	2	2	0	0	0	0	1	2	0	2	2	3.1	3.1	3.1	131.86	1390	1390;1419;1441;1441;1458;1458;1487	0	11.334
A2ASS6-3;F7CR78	A2ASS6-3;F7CR78	2;1	2;1	1;0	Titin	Ttn	;	2	2	2	1	1	1	0	1	0	0	0	1	2	1	1	0	1	0	0	0	1	2	1	1	0	1	0	0	0	1	1	0.5	0.5	0.3	619.32	5508	5508;8272	0.0063158	1.2957	By MS/MS	By MS/MS
Q501L5;O35103;Q8C7G2	Q501L5;O35103	3;3;1	3;3;1	3;3;1	Osteomodulin	Omd	;	3	3	3	3	0	2	1	0	0	0	1	0	2	0	2	1	0	0	0	1	0	2	0	2	1	0	0	0	1	0	2	5.9	5.9	5.9	49.729	423	423;423;209	0.0096339	1.0401		By MS/MS	By matching
Q9ER05;Q9D7P8;Q9D960;Q9DC82	Q9ER05;Q9D7P8;Q9D960	7;6;6;3	7;6;6;3	7;6;6;3		Ctrl	;;	4	7	7	7	5	2	3	0	0	0	3	5	2	5	2	3	0	0	0	3	5	2	5	2	3	0	0	0	3	5	2	42.4	42.4	42.4	28.135	264	264;264;264;164	0	26.208	By MS/MS	By MS/MS	By MS/MS
Q3TWK8;B2CQD6;Q08879;Q08879-2;Q3TW70	Q3TWK8;B2CQD6;Q08879;Q08879-2	7;7;7;4;2	1;1;1;1;0	1;1;1;1;0	Fibulin-1	Fbln1	;;;	5	7	1	1	4	6	4	6	5	4	3	5	3	0	0	0	0	0	0	0	1	0	0	0	0	0	0	0	0	1	0	11.1	2.4	2.4	78.06	705	705;705;705;685;228	0	48.605	By matching	By matching	By matching
Q792Y6;P07146	Q792Y6;P07146	5;5	3;3	3;3	Anionic trypsin-2	Prss2	;	2	5	3	3	4	2	2	1	1	1	3	5	3	3	1	0	1	0	0	1	3	1	3	1	0	1	0	0	1	3	1	35.8	28.5	28.5	26.203	246	246;246	0	14.287	By MS/MS	By MS/MS	By matching
Q5BKQ4	Q5BKQ4	9	9	9	Inactive pancreatic lipase-related protein 1	Pnliprp1		1	9	9	9	5	2	7	1	1	3	5	6	3	5	2	7	1	1	3	5	6	3	5	2	7	1	1	3	5	6	3	25.8	25.8	25.8	52.695	473	473	0	19.749	By MS/MS	By MS/MS	By MS/MS
P97298	P97298	5	1	1	Pigment epithelium-derived factor	Serpinf1		1	5	1	1	4	5	3	5	5	4	2	4	3	0	1	0	1	1	0	0	0	0	0	1	0	1	1	0	0	0	0	15.3	4.3	4.3	46.233	417	417	0	8.0734	By matching	By MS/MS	By matching
Q61782	Q61782	5;5	1;1	1;1			;	2	5	1	1	4	1	5	0	2	1	3	4	3	0	0	1	0	0	0	0	0	0	0	0	1	0	0	0	0	0	0	58.1	10.8	10.8	10.662	93	93;93	1	-2	By matching	By matching	By MS/MS
Q546G4;P07724;K7R066	Q546G4;P07724;K7R066	4;4;2	2;2;1	2;2;1	Serum albumin	Alb	;;	3	4	2	2	2	2	2	2	2	2	2	1	3	1	1	0	1	1	1	1	0	2	1	1	0	1	1	1	1	0	2	7.4	3.6	3.6	68.692	608	608;608;171	0	2.4905	By matching	By matching	By matching
A8DUK0;P02088;A8DUL5;A8DUP5;A8DUP7;A8DUM2;A8DUP3;A8DUK2;B1Q450;A8DUK7;A8DUK4;E9Q223;A8DUP0;A8DUL2;A8DUL0;A8DUQ5;Q61650;A8DUL7;Q61348	A8DUK0;P02088;A8DUL5;A8DUP5;A8DUP7;A8DUM2;A8DUP3;A8DUK2;B1Q450;A8DUK7;A8DUK4;E9Q223;A8DUP0;A8DUL2;A8DUL0;A8DUQ5	8;8;7;7;7;7;6;6;5;5;5;4;4;4;4;4;3;3;2	6;6;5;5;5;5;5;4;3;3;3;3;3;2;2;2;2;1;2	2;2;1;2;2;2;2;0;1;0;0;0;0;0;0;0;2;0;2	Hemoglobin subunit beta-1	Hbbt1;Hbb-b1;HBB1;Hbb-bs	;;;;;;;;;;;;;;;	19	8	6	2	3	2	7	2	5	2	7	3	3	1	0	5	0	3	0	5	1	1	0	0	2	0	1	0	1	0	0	68.7	55.8	15	15.84	147	147;147;147;147;147;147;147;151;147;147;147;103;147;147;147;147;52;147;31	0	15.082	By matching	By matching	By MS/MS
Q9D7Y7;Q9CPN9	Q9D7Y7;Q9CPN9	5;5;1;1;1;1;1;1;1	5;5;1;1;1;1;1;1;1	5;5;1;1;1;1;1;1;1		2210010C04Rik	;	9	5	5	5	3	3	4	0	1	2	4	3	3	3	3	4	0	1	2	4	3	3	3	3	4	0	1	2	4	3	3	34.4	34.4	34.4	26.407	247	247;247;1473;1489;1506;1544;1549;1561;1577	0	19.455	By MS/MS	By MS/MS	By MS/MS
B2RSN3;Q9CWF2;Q7TMM9;Q99J49;G3UZR1;Q62363;D5MR34	B2RSN3;Q9CWF2;Q7TMM9;Q99J49	11;11;11;8;2;1;1	1;1;1;1;0;0;0	1;1;1;1;0;0;0	Tubulin beta-2B chain;Tubulin beta-2A chain	Tubb2b;Tubb2a	;;;	7	11	1	1	1	4	4	2	8	8	7	2	3	0	0	0	0	0	1	1	0	1	0	0	0	0	0	1	1	0	1	36.9	3.4	3.4	49.953	445	445;445;445;298;67;100;133	0	3.9446	By matching	By matching	By matching
P05208	P05208	7	7	7	Chymotrypsin-like elastase family member 2A	Cela2a		1	7	7	7	3	5	5	1	2	1	3	4	3	3	5	5	1	2	1	3	4	3	3	5	5	1	2	1	3	4	3	47.2	47.2	47.2	28.913	271	271	0	52.905	By MS/MS	By MS/MS	By MS/MS
P68369;Q52L87;Q3TIZ0;P68373;Q5FW91;P05214;Q9D9Y2;Q9JJZ2	P68369;Q52L87;Q3TIZ0;P68373;Q5FW91;P05214;Q9D9Y2	17;16;16;16;14;14;9;8	1;1;1;1;1;1;1;1	1;1;1;1;1;1;1;1	Tubulin alpha-1A chain;Tubulin alpha-1C chain;Tubulin alpha-3 chain	Tuba1a;Tuba1c;Tuba3a	;;;;;;	8	17	1	1	7	3	9	5	8	15	13	5	3	0	0	0	0	1	1	1	0	0	0	0	0	0	1	1	1	0	0	50.3	2.9	2.9	50.135	451	451;449;449;449;450;450;395;449	0	3.9337	By matching	By matching	By matching
Q3THH1;Q922R8;Q3TML0;Q3TJL8;Q9DAB4	Q3THH1;Q922R8;Q3TML0;Q3TJL8;Q9DAB4	7;7;6;6;5	7;7;6;6;5	7;7;6;6;5	Protein disulfide-isomerase A6	Pdia6	;;;;	5	7	7	7	2	1	6	1	6	6	6	2	3	2	1	6	1	6	6	6	2	3	2	1	6	1	6	6	6	2	3	22.2	22.2	22.2	48.657	445	445;440;445;445;391	0	58.138	By MS/MS	By matching	By MS/MS
Q91VL4;Q3TP88;Q3TUE2;Q3TX57;Q3TU64;Q01149	Q91VL4;Q3TP88;Q3TUE2;Q3TX57;Q3TU64;Q01149	4;4;4;4;4;4	4;4;4;4;4;4	4;4;4;4;4;4	Collagen alpha-2(I) chain	Col1a2	;;;;;	6	4	4	4	1	2	2	2	1	1	3	3	3	1	2	2	2	1	1	3	3	3	1	2	2	2	1	1	3	3	3	9.5	9.5	9.5	56.662	566	566;959;1241;1372;1372;1372	0	20.89	By MS/MS	By MS/MS	By matching
Q58E64;Q3UA81;P10126;Q3TII3;Q3UZQ3;D3YZ68;P62631;D3Z3I8;Q4FZE5	Q58E64;Q3UA81;P10126;Q3TII3;Q3UZQ3	11;11;11;10;10;5;5;4;3	11;11;11;10;10;5;5;4;3	11;11;11;10;10;5;5;4;3	Elongation factor 1-alpha;Elongation factor 1-alpha 1	Eef1a1	;;;;	9	11	11	11	3	4	7	3	5	8	8	3	3	3	4	7	3	5	8	8	3	3	3	4	7	3	5	8	8	3	3	31.4	31.4	31.4	50.113	462	462;462;462;462;462;249;463;186;108	0	91.696	By MS/MS	By MS/MS	By MS/MS
P05213;Q99KA2;O89052;Q3UX10	P05213;Q99KA2	17;13;5;1	17;13;5;1	0;0;0;0	Tubulin alpha-1B chain	Tuba1b	;	4	17	17	0	7	4	10	6	8	15	13	6	3	7	4	10	6	8	15	13	6	3	0	0	0	0	0	0	0	0	0	50.3	50.3	0	50.151	451	451;347;99;446	0	76.344	By MS/MS	By MS/MS	By MS/MS
Q5SS40;P62259;Q8BPH1;D6REF3;F6WA09;Q3V453	Q5SS40;P62259;Q8BPH1;D6REF3;F6WA09	12;12;10;6;6;3	12;12;10;6;6;3	10;10;8;5;5;2	14-3-3 protein epsilon	Ywhae	;;;;	6	12	12	10	4	4	6	3	6	8	8	3	3	4	4	6	3	6	8	8	3	3	2	3	4	2	5	7	6	2	2	47.1	47.1	40	29.174	255	255;255;255;130;154;91	0	48.764	By MS/MS	By MS/MS	By MS/MS
D3YW52;Q61838	D3YW52;Q61838	4;4	3;3	3;3	Alpha-2-macroglobulin;Alpha-2-macroglobulin 165 kDa subunit;Alpha-2-macroglobulin 35 kDa subunit	Pzp;A2m	;	2	4	3	3	3	3	3	3	3	3	3	3	3	2	2	2	2	2	2	2	2	2	2	2	2	2	2	2	2	2	2	2.3	1.8	1.8	167.28	1507	1507;1495	0	6.1637	By MS/MS	By MS/MS	By MS/MS
Q3UZV3;Q547J8;Q3TYM6;Q3TT48;P21661	Q3UZV3;Q547J8;Q3TYM6;Q3TT48;P21661	9;9;9;9;9	9;9;9;9;9	9;9;9;9;9	Neuroendocrine convertase 2	Pcsk2	;;;;	5	9	9	9	5	0	5	4	8	6	5	3	3	5	0	5	4	8	6	5	3	3	5	0	5	4	8	6	5	3	3	22.6	22.6	22.6	68.911	619	619;637;637;736;637	0	97.286	By MS/MS		By MS/MS
B2RTM0;P62806;Q61667;Q6B822	B2RTM0;P62806;Q61667	6;6;4;2	6;6;4;2	6;6;4;2	Histone H4	Hist2h4;Hist1h4a	;;	4	6	6	6	4	2	5	0	4	4	5	3	3	4	2	5	0	4	4	5	3	3	4	2	5	0	4	4	5	3	3	57.3	57.3	57.3	11.367	103	103;103;55;43	0	15.108	By MS/MS	By MS/MS	By MS/MS
P35700;B1AXW5;B1AXW6;Q3U9J9;B1AXW4	P35700;B1AXW5;B1AXW6;Q3U9J9	7;6;6;6;3	7;6;6;6;3	6;5;5;5;3	Peroxiredoxin-1	Prdx1	;;;	5	7	7	6	1	0	4	0	3	4	6	1	3	1	0	4	0	3	4	6	1	3	0	0	3	0	3	3	5	1	2	41.2	41.2	37.2	22.176	199	199;170;176;199;123	0	11.904	By matching		By MS/MS
P62204;Q3UKW2;Q9D6P8;G3UX57	P62204;Q3UKW2;Q9D6P8	7;6;4;1	7;6;4;1	7;6;4;1	Calmodulin;Calmodulin-like protein 3	Calm1;Calml3	;;	4	7	7	7	1	0	3	0	4	6	5	2	3	1	0	3	0	4	6	5	2	3	1	0	3	0	4	6	5	2	3	50.3	50.3	50.3	16.837	149	149;197;149;39	0	53.836	By matching		By MS/MS
P27773;F6Q404	P27773	26;3	26;3	26;3	Protein disulfide-isomerase A3	Pdia3		2	26	26	26	5	0	15	0	12	10	19	1	3	5	0	15	0	12	10	19	1	3	5	0	15	0	12	10	19	1	3	59.2	59.2	59.2	56.678	505	505;124	0	101.65	By MS/MS		By MS/MS
Q8C6F9;Q3TV26;P43137	Q8C6F9;Q3TV26;P43137	5;5;5	5;5;5	5;5;5	Lithostathine-1	Reg1	;;	3	5	5	5	2	1	5	0	0	0	5	1	3	2	1	5	0	0	0	5	1	3	2	1	5	0	0	0	5	1	3	45.2	45.2	45.2	14.34	126	126;165;165	0	32.842	By MS/MS	By MS/MS	By MS/MS
A0A0B6VSQ6;P15947;A0A0U1RPN5;Q7M0B4;P15945	A0A0B6VSQ6;P15947;A0A0U1RPN5	5;5;4;2;2	5;5;4;2;2	5;5;4;2;2	Kallikrein-1	Klk1	;;	5	5	5	5	1	0	5	0	0	0	5	1	3	1	0	5	0	0	0	5	1	3	1	0	5	0	0	0	5	1	3	29.1	29.1	29.1	28.774	261	261;261;151;94;261	0	5.2884	By matching		By MS/MS
Q6IMF0;E9Q1Y9;B2RTB6;P97861;Q61726;Q9ERE2	Q6IMF0;E9Q1Y9;B2RTB6;P97861;Q61726;Q9ERE2	15;13;13;12;12;11;11	2;2;2;1;1;2;1	1;1;1;0;0;1;0	Keratin, type II cuticular Hb3;Keratin, type II cuticular Hb6;Keratin, type II cuticular Hb1	Krt83;5430421N21Rik;Krt86;Krt81	;;;;;;	7	15	2	1	2	10	11	1	2	2	3	8	4	0	0	2	0	1	1	0	0	0	0	0	1	0	1	1	0	0	0	28.9	3.6	1.8	54.628	495	495;479;479;486;486;495;481	0	5.4392	By matching	By matching	By MS/MS
Q9CQ52;A2A9U8	Q9CQ52	7;1	6;1	6;1	Chymotrypsin-like elastase family member 3B	Cela3b		2	7	6	6	5	3	5	3	1	1	4	4	4	5	2	5	2	1	1	4	4	4	5	2	5	2	1	1	4	4	4	38.7	36.1	36.1	28.904	269	269;283	0	24.005	By MS/MS	By MS/MS	By MS/MS
B9EIU2;V9GZG9;V9GZQ6;V9GZJ5	B9EIU2;V9GZG9;V9GZQ6;V9GZJ5	8;7;7;6	2;1;1;1	1;0;0;0		C4a;Slp	;;;	4	8	2	1	4	7	2	5	7	4	4	4	4	0	2	0	1	2	1	0	0	0	0	1	0	1	1	1	0	0	0	4.2	1.7	0.4	193.73	1735	1735;1716;1735;1735	0.0061475	1.2274	By matching	By MS/MS	By matching
Q5SX49;Q8CEH8;Q5SX50;P62962;Q3U7V7;J3QMC2	Q5SX49;Q8CEH8;Q5SX50;P62962;Q3U7V7	5;5;5;5;4;2	2;2;2;2;2;1	2;2;2;2;2;1	Profilin;Profilin-1	Pfn1	;;;;	6	5	2	2	4	4	4	3	5	4	4	4	4	1	1	1	0	2	1	1	1	1	1	1	1	0	2	1	1	1	1	72.3	36.6	36.6	11.82	112	112;140;140;140;140;55	0	7.3583	By matching	By matching	By MS/MS
Q3UBA6;Q3TZJ3;Q3TH56;Q3TEK2;P63017;Q504P4;Q3U9L2;Q3TF16;Q3TQ13;Q3UDS0;Q3ULM1;Q3TRH3;Q3TB63;Q3KQJ4;Q3TH04;Q3UXU1;B7U582;P17156;D3Z5E2;D3YW43;Q3UBR0;B2CSK2;A1L347;Q3TU85;Q3TAI8;A1E2B8;P16627;Q61696;P17879;Q9R2A1;Q61698;Q9QWU1;O88687;O88688;Q91ZU5;Q91ZU4	Q3UBA6;Q3TZJ3;Q3TH56;Q3TEK2;P63017;Q504P4;Q3U9L2;Q3TF16;Q3TQ13;Q3UDS0;Q3ULM1;Q3TRH3;Q3TB63;Q3KQJ4;Q3TH04	21;21;21;21;21;20;20;20;20;19;19;19;17;16;14;10;7;7;5;5;5;4;4;4;4;4;4;4;4;2;2;2;1;1;1;1	19;19;19;19;19;18;18;18;18;17;18;18;15;15;13;10;5;5;4;4;5;2;2;3;3;3;2;3;3;1;2;1;0;1;1;1	19;19;19;19;19;18;18;18;18;17;18;18;15;15;13;10;5;5;4;4;5;2;2;3;3;3;2;3;3;1;2;1;0;1;1;1	Heat shock cognate 71 kDa protein	Hspa8	;;;;;;;;;;;;;;	36	21	19	19	4	1	14	2	17	19	15	3	4	2	1	12	2	15	17	13	1	2	2	1	12	2	15	17	13	1	2	45.4	43.7	43.7	70.898	646	646;646;646;646;646;627;646;646;646;553;619;646;459;565;518;396;633;633;116;158;251;641;641;641;641;641;641;641;642;111;228;552;43;143;282;461	0	84.459	By MS/MS	By matching	By MS/MS
Q99LL6;P11087-2;P11087;Q60785	Q99LL6;P11087-2;P11087;Q60785	6;6;6;4;1	6;6;6;4;1	6;6;6;4;1	Collagen alpha-1(I) chain	Col1a1	;;;	5	6	6	6	2	2	1	3	4	4	4	4	4	2	2	1	3	4	4	4	4	4	2	2	1	3	4	4	4	4	4	11.2	11.2	11.2	58.804	589	589;1225;1453;325;114	0	61.299	By MS/MS	By MS/MS	By matching
B2RTL6;Q9Z1T2;E9PWF0;Q05895	B2RTL6;Q9Z1T2	5;5;1;1	4;4;1;1	4;4;1;1	Thrombospondin-4	Thbs4	;	4	5	4	4	4	3	1	4	5	5	3	4	4	3	2	0	3	4	4	2	3	3	3	2	0	3	4	4	2	3	3	6.3	5.3	5.3	106.37	963	963;963;919;956	0	35.275	By MS/MS	By MS/MS	By matching
P47867;P47867-2	P47867;P47867-2	15;14	15;14	15;14	Secretogranin-3	Scg3	;	2	15	15	15	9	1	14	2	6	3	9	3	4	9	1	14	2	6	3	9	3	4	9	1	14	2	6	3	9	3	4	42.7	42.7	42.7	53.326	471	471;466	0	82.795	By MS/MS	By matching	By MS/MS
P68372;Q9D6F9;Q9CVR0;Q9DCR1;Q9CRT0;Q3U9U3;Q3UMM1;Q922F4;Q9CUN8	P68372;Q9D6F9;Q9CVR0;Q9DCR1	13;10;9;8;6;6;6;6;5	13;10;9;8;6;6;6;6;5	3;2;2;0;0;0;0;0;0	Tubulin beta-4B chain;Tubulin beta-4A chain	Tubb4b;Tubb4a	;;;	9	13	13	3	2	4	6	2	9	9	8	3	4	2	4	6	2	9	9	8	3	4	1	0	2	0	1	2	2	1	1	45.6	45.6	12.1	49.83	445	445;444;291;299;235;375;447;447;211	0	107.26	By MS/MS	By MS/MS	By MS/MS
S4R257;D2KHZ9;A0A0A0MQF6;P16858;S4R1W1;Q3TUZ9;D3YYI5;W8QM43;Q6IWE3;Q4VBD1;Q8CEV2;Q3V2I5;A0A0R4J0X7;S4R2G5;Q64467;S4R1W8;V9GXA7;V9GXK0;V9GX06;Q8BJ40	S4R257;D2KHZ9;A0A0A0MQF6;P16858;S4R1W1;Q3TUZ9;D3YYI5	11;11;11;11;10;6;6;2;2;2;2;2;2;2;2;1;1;1;1;1	11;11;11;11;10;6;6;2;2;2;2;2;2;2;2;1;1;1;1;1	11;11;11;11;10;6;6;2;2;2;2;2;2;2;2;1;1;1;1;1	Glyceraldehyde-3-phosphate dehydrogenase	Gapdh;GAPDH;Gm3839;Gm10481;Gm7293	;;;;;;	20	11	11	11	2	3	6	4	5	7	8	4	4	2	3	6	4	5	7	8	4	4	2	3	6	4	5	7	8	4	4	58.2	58.2	58.2	29.939	280	280;333;359;333;333;144;336;77;96;136;156;236;438;440;440;55;121;151;183;209	0	62.219	By MS/MS	By MS/MS	By MS/MS
Q5SVY2;Q3UAJ1;Q3TE63;P17742;Q9CZK9;F8VPN3;V9GXC1;V9GX31	Q5SVY2;Q3UAJ1;Q3TE63;P17742;Q9CZK9	9;9;9;9;7;3;2;2	9;9;9;9;7;3;2;2	9;9;9;9;7;3;2;2	Peptidyl-prolyl cis-trans isomerase;Peptidyl-prolyl cis-trans isomerase A;Peptidyl-prolyl cis-trans isomerase A, N-terminally processed	Ppia	;;;;	8	9	9	9	5	5	6	4	8	6	5	4	4	5	5	6	4	8	6	5	4	4	5	5	6	4	8	6	5	4	4	61	61	61	17.971	164	164;164;164;164;167;147;77;77	0	47.499	By MS/MS	By MS/MS	By MS/MS
P17751;H7BXC3	P17751;H7BXC3	9;8	9;8	9;8	Triosephosphate isomerase	Tpi1	;	2	9	9	9	2	3	7	2	5	4	7	2	4	2	3	7	2	5	4	7	2	4	2	3	7	2	5	4	7	2	4	36.8	36.8	36.8	32.191	299	299;167	0	26.035	By MS/MS	By MS/MS	By MS/MS
Q792Z1	Q792Z1	6	2	2		Try10		1	6	2	2	5	3	5	1	2	3	5	4	4	2	1	2	1	2	2	2	1	1	2	1	2	1	2	2	2	1	1	42.3	15.4	15.4	26.221	246	246	0	10.054	By MS/MS	By MS/MS	By MS/MS
Q5FWB7;A6ZI44;P05064;Q6NY00;D3YWI1;Q9CPQ9;A6ZI46;A0A0U1RPN8;D3YV98;A0A0U1RPT5;D3Z510;A6ZI47;P05063;Q3UER1;Q3TJ66;Q91Y97	Q5FWB7;A6ZI44;P05064;Q6NY00;D3YWI1;Q9CPQ9;A6ZI46;A0A0U1RPN8	14;14;14;11;10;9;9;7;6;6;5;4;3;1;1;1	14;14;14;11;10;9;9;7;6;6;5;4;3;1;1;1	14;14;14;11;10;9;9;7;6;6;5;4;3;1;1;1	Fructose-bisphosphate aldolase;Fructose-bisphosphate aldolase A	Aldoa;Aldoart1	;;;;;;;	16	14	14	14	0	2	7	1	8	10	10	2	4	0	2	7	1	8	10	10	2	4	0	2	7	1	8	10	10	2	4	52.5	52.5	52.5	39.355	364	364;418;364;364;237;364;419;190;193;209;131;364;363;364;364;364	0	69.068		By MS/MS	By MS/MS
P14152;B1ATQ3	P14152	10;2	10;2	10;2	Malate dehydrogenase, cytoplasmic	Mdh1		2	10	10	10	1	0	7	0	7	6	9	2	4	1	0	7	0	7	6	9	2	4	1	0	7	0	7	6	9	2	4	29.9	29.9	29.9	36.511	334	334;156	0	19.896	By matching		By MS/MS
Q9R0T7;Q9QUK9;Q3V2E0;G3UXD0;Q7M754;Q792Y9;Q9Z1R9	Q9R0T7;Q9QUK9;Q3V2E0;G3UXD0;Q7M754	8;6;6;4;4;2;2	8;6;6;4;4;2;2	3;3;3;2;1;0;0		Try4;Try5;Gm5409	;;;;	7	8	8	3	5	4	6	1	2	4	5	6	5	5	4	6	1	2	4	5	6	5	2	1	2	1	1	2	1	2	1	57.3	57.3	26.4	26.274	246	246;246;255;135;246;245;246	0	87.283	By MS/MS	By MS/MS	By MS/MS
Q02257;F7CRC6;Q80VE7;Q3UZT7;Q02248;F7BAC9	Q02257	22;2;2;2;2;1	22;2;2;2;2;1	22;2;2;2;2;1	Junction plakoglobin	Jup		6	22	22	22	10	0	21	0	0	1	16	11	5	10	0	21	0	0	1	16	11	5	10	0	21	0	0	1	16	11	5	35.2	35.2	35.2	81.8	745	745;174;554;781;781;169	0	52.605	By MS/MS		By MS/MS
Q8BFZ3	Q8BFZ3	8	1	1	Beta-actin-like protein 2	Actbl2		1	8	1	1	4	7	4	6	5	6	4	4	5	0	0	0	0	0	1	0	1	1	0	0	0	0	0	1	0	1	1	24.5	3.2	3.2	42.004	376	376	1	-2	By matching	By matching	By matching
Q543R4;Q00493	Q543R4;Q00493	19;19	19;19	19;19	Carboxypeptidase E	Cpe	;	2	19	19	19	12	1	15	4	15	13	12	4	5	12	1	15	4	15	13	12	4	5	12	1	15	4	15	13	12	4	5	46	46	46	53.255	476	476;476	0	121.39	By MS/MS	By matching	By MS/MS
Q71LX8;P11499;Q80YC2;Q811H6;E9Q3D6;D3Z1R1;E9PX27;E9Q0C3	Q71LX8;P11499	15;15;5;5;4;3;3;2	13;13;5;5;4;1;1;2	8;8;3;3;3;0;0;2	Heat shock protein HSP 90-beta	Hsp90ab1	;	8	15	13	8	4	3	11	3	9	8	12	1	5	4	3	10	3	7	7	11	1	4	2	1	6	1	4	4	7	0	2	25.8	23.9	16	83.28	724	724;724;363;378;189;76;112;161	0	60.107	By MS/MS	By matching	By MS/MS
P63101;D3YXN6;Q3UA58;Q8BWN0;D3YXF4	P63101	11;4;4;4;2	9;3;3;3;2	8;3;2;3;2	14-3-3 protein zeta/delta	Ywhaz		5	11	9	8	7	4	9	2	7	7	8	6	5	5	3	7	1	6	6	6	5	4	4	2	6	1	5	5	5	4	3	53.5	46.1	42.4	27.771	245	245;88;112;117;45	0	80.143	By MS/MS	By MS/MS	By MS/MS
Q91X79	Q91X79	8	8	7	Chymotrypsin-like elastase family member 1	Cela1		1	8	8	7	6	8	6	3	2	4	6	5	5	6	8	6	3	2	4	6	5	5	6	7	6	2	2	4	6	5	5	50	50	47.4	28.9	266	266	0	140.18	By MS/MS	By MS/MS	By MS/MS
Q03517;Q4W8U9	Q03517;Q4W8U9	17;16	17;16	17;16	Secretogranin-2;Secretoneurin;Manserin	Scg2	;	2	17	17	17	6	0	13	2	6	8	10	3	5	6	0	13	2	6	8	10	3	5	6	0	13	2	6	8	10	3	5	33.2	33.2	33.2	70.643	617	617;577	0	53.58	By MS/MS		By MS/MS
Q6P8U6;Q9D950;Q4VBW7;P17892	Q6P8U6	14;6;1;1	14;6;1;1	14;6;1;1	Pancreatic triacylglycerol lipase	Pnlip		4	14	14	14	7	4	11	2	2	1	8	4	6	7	4	11	2	2	1	8	4	6	7	4	11	2	2	1	8	4	6	39.8	39.8	39.8	51.427	465	465;163;482;482	0	39.138	By MS/MS	By MS/MS	By MS/MS
D3Z6P0-2;D3Z6P0;F6S5U2;F6Q519	D3Z6P0-2;D3Z6P0;F6S5U2	11;11;6;3	11;11;6;3	11;11;6;3	Protein disulfide-isomerase A2	Pdia2	;;	4	11	11	11	2	1	11	0	0	1	10	4	6	2	1	11	0	0	1	10	4	6	2	1	11	0	0	1	10	4	6	24	24	24	57.959	524	524;527;225;154	0	19.772	By MS/MS	By matching	By MS/MS
Q91V38;Q3UAD6;P08113;Q3UBU0;Q3TUD6;Q8CCY5;Q8C2R2;F7C312;Q9CW12	Q91V38;Q3UAD6;P08113;Q3UBU0;Q3TUD6;Q8CCY5	21;21;21;20;12;12;10;10;1	21;21;21;20;12;12;10;10;1	19;19;19;18;12;12;8;10;1	Endoplasmin	Hsp90b1	;;;;;	9	21	21	19	6	0	11	1	12	7	16	3	6	6	0	11	1	12	7	16	3	6	6	0	10	1	10	6	15	3	5	30.2	30.2	28.4	92.489	802	802;802;802;802;612;615;277;373;141	0	51.441	By MS/MS		By MS/MS
Q9CR35	Q9CR35	10	10	10	Chymotrypsinogen B;Chymotrypsin B chain A;Chymotrypsin B chain B;Chymotrypsin B chain C	Ctrb1		1	10	10	10	8	8	8	6	3	6	6	8	6	8	8	8	6	3	6	6	8	6	8	8	8	6	3	6	6	8	6	68.1	68.1	68.1	27.822	263	263	0	181.68	By MS/MS	By MS/MS	By MS/MS
Q3UV17	Q3UV17	9;4	1;0	1;0	Keratin, type II cytoskeletal 2 oral	Krt76		2	9	1	1	7	4	9	5	4	4	7	6	6	1	1	1	1	1	1	1	1	1	1	1	1	1	1	1	1	1	1	11.4	1.5	1.5	62.844	594	594;529	0	2.2063	By MS/MS	By MS/MS	By MS/MS
Q8BIS2;Q148Q7;E9Q1Z0	Q8BIS2;Q148Q7;E9Q1Z0	10;10;10;5	1;1;1;1	0;0;0;0		4732456N10Rik	;;;	4	10	1	0	6	3	9	3	5	5	6	6	7	0	0	1	0	0	0	0	0	0	0	0	0	0	0	0	0	0	0	12.8	2	0	58.266	538	538;538;538;511	0	2.1728	By matching	By matching	By MS/MS
E9Q557;E9PZW0;Q9CV95;Q8BP77	E9Q557;E9PZW0	47;32;8;5	47;32;8;5	47;32;8;5	Desmoplakin	Dsp	;	4	47	47	47	14	2	44	2	5	2	30	15	7	14	2	44	2	5	2	30	15	7	14	2	44	2	5	2	30	15	7	16.3	16.3	16.3	332.91	2883	2883;2284;474;482	0	99.321	By MS/MS	By MS/MS	By MS/MS
P26339;Q3UN28	P26339;Q3UN28	20;13	20;13	20;13	Chromogranin-A;Pancreastatin;Beta-granin;WE-14;Catestatin;GE-25;Serpinin-RRG;Serpinin;p-Glu serpinin precursor	Chga	;	2	20	20	20	13	1	14	5	15	15	11	9	7	13	1	14	5	15	15	11	9	7	13	1	14	5	15	15	11	9	7	49.9	49.9	49.9	51.789	463	463;314	0	323.31	By MS/MS	By matching	By MS/MS
Q3UDR2;Q3URP6;Q3U738;Q3TWE3;Q3TIM0;Q3THC3;Q3TF72;P09103;Q3TGS0;Q3UBY9;Q3UJA8;Q3UA23;Q3TT76;Q3TIQ5;E9Q8G8	Q3UDR2;Q3URP6;Q3U738;Q3TWE3;Q3TIM0;Q3THC3;Q3TF72;P09103;Q3TGS0;Q3UBY9;Q3UJA8;Q3UA23;Q3TT76	17;17;17;17;17;17;17;17;16;16;16;16;11;6;6	17;17;17;17;17;17;17;17;16;16;16;16;11;6;6	17;17;17;17;17;17;17;17;16;16;16;16;11;6;6	Protein disulfide-isomerase	P4hb	;;;;;;;;;;;;	15	17	17	17	7	7	16	2	10	9	16	6	7	7	7	16	2	10	9	16	6	7	7	7	16	2	10	9	16	6	7	38.2	38.2	38.2	56.6	505	505;509;509;509;509;509;509;509;509;509;509;509;385;144;165	0	98.802	By MS/MS	By MS/MS	By MS/MS
Q7TPZ8	Q7TPZ8	14	13	13	Carboxypeptidase A1	Cpa1		1	14	13	13	6	1	12	0	0	0	10	6	7	6	1	12	0	0	0	9	6	6	6	1	12	0	0	0	9	6	6	41.3	39.4	39.4	47.384	419	419	0	37.037	By MS/MS	By MS/MS	By MS/MS
P11679	P11679	15;10;5;5;4	7;2;1;1;1	7;2;1;1;1	Keratin, type II cytoskeletal 8	Krt8	;	5	15	7	7	8	4	14	4	6	5	13	8	8	1	1	6	1	1	1	6	1	1	1	1	6	1	1	1	6	1	1	22.2	15.1	15.1	54.565	490	490;483;99;443;499	0	11.442	By matching	By matching	By MS/MS
Q543J5;P32261	Q543J5;P32261	10;10	1;1	1;1	Antithrombin-III	Serpinc1	;	2	10	1	1	7	9	6	9	8	7	8	8	8	1	1	0	0	1	1	1	1	1	1	1	0	0	1	1	1	1	1	20	4.9	4.9	52.003	465	465;465	0	6.4548	By MS/MS	By MS/MS	By matching
Q8VI54;Q9R0G6;A1A557;A2VCQ0	Q8VI54;Q9R0G6;A1A557;A2VCQ0	10;10;9;9	3;3;2;2	3;3;2;2	Cartilage oligomeric matrix protein	Comp	;;;	4	10	3	3	7	5	5	6	7	7	5	8	8	2	1	2	1	2	2	2	2	2	2	1	2	1	2	2	2	2	2	16.8	5	5	82.175	755	755;755;755;759	0	42.101	By MS/MS	By MS/MS	By matching
B2RS76	B2RS76	15	15	14		Cpb1		1	15	15	14	8	4	13	2	2	3	11	7	9	8	4	13	2	2	3	11	7	9	8	4	13	2	2	3	10	7	8	47.7	47.7	45.8	47.573	415	415	0	83.392	By MS/MS	By MS/MS	By MS/MS
Q9QZ83	Q9QZ83	19	2	2		Actg1		1	19	2	2	11	19	8	18	15	13	10	11	9	1	2	1	2	2	2	1	1	1	1	2	1	2	2	2	1	1	1	57	5.6	5.6	43.6	393	393	0	53.878	By MS/MS	By MS/MS	By MS/MS
Q8K016;G3X977;Q61703	Q8K016;G3X977;Q61703	15;15;15	1;1;1	1;1;1	Inter-alpha-trypsin inhibitor heavy chain H2	Itih2	;;	3	15	1	1	9	14	9	14	12	9	10	10	10	0	0	0	0	0	0	1	0	0	0	0	0	0	0	0	1	0	0	13.5	3.5	3.5	105.94	946	946;950;946	0	2.5991	By matching	By matching	By matching
Q3UBP6;Q3UBQ4	Q3UBP6;Q3UBQ4	21;19	1;1	0;0		Actb	;	2	21	1	0	13	19	10	18	17	15	11	12	10	1	1	1	1	1	1	1	1	1	0	0	0	0	0	0	0	0	0	62.7	4.3	0	41.768	375	375;374	0	37.093	By MS/MS	By MS/MS	By MS/MS
Q4KL81;P63260;Q3TSB7;Q3UD81;G3UYG0;B1ATY1	Q4KL81;P63260;Q3TSB7;Q3UD81	22;22;21;12;9;9	1;1;1;1;1;1	0;0;0;0;0;0	Actin, cytoplasmic 2;Actin, cytoplasmic 2, N-terminally processed	Actg1	;;;	6	22	1	0	14	20	10	19	18	16	12	13	11	1	1	0	1	1	1	1	1	1	0	0	0	0	0	0	0	0	0	66.1	4.5	0	41.792	375	375;375;375;235;132;153	0	8.1774	By MS/MS	By MS/MS	By matching
Q3UAF7;Q3UAF6;Q3U5R4;B2RRX1;P60710;Q3UAA9;Q3UA89;Q3U939;Q3U804;Q3UGS0;Q61276;Q3TIJ9;Q3UCF8;E9Q1F2;E9Q5F4;G3UZ07;Q61272;A1E281;Q99NC5;E9Q606;O89054;F8WGM8;E9Q2D1;Q6IWE2;F6WX90;Q7M0E4;Q8CF71;V9GXQ2;A0A0U1RQ96;Q6GQT3;E9Q3M9	Q3UAF7;Q3UAF6;Q3U5R4;B2RRX1;P60710;Q3UAA9;Q3UA89;Q3U939;Q3U804;Q3UGS0;Q61276;Q3TIJ9;Q3UCF8;E9Q1F2;E9Q5F4;G3UZ07	22;22;22;22;22;21;21;20;20;20;19;19;18;17;15;11;9;8;8;8;6;5;5;4;3;2;2;2;2;1;1	22;22;22;22;22;21;21;20;20;20;19;19;18;17;15;11;9;8;8;8;6;5;5;4;3;2;2;2;2;1;1	0;0;0;0;0;0;0;0;0;0;0;0;0;0;0;0;0;0;0;0;0;0;0;0;0;0;0;0;0;0;0	Actin, cytoplasmic 1;Actin, cytoplasmic 1, N-terminally processed	Actb;Actg1	;;;;;;;;;;;;;;;	31	22	22	0	14	20	11	19	18	16	12	13	11	14	20	11	19	18	16	12	13	11	0	0	0	0	0	0	0	0	0	66.1	66.1	0	41.75	375	375;375;375;375;375;375;375;374;374;375;375;375;374;295;265;268;336;121;134;150;136;105;108;77;43;36;109;156;195;835;1175	0	287.69	By MS/MS	By MS/MS	By MS/MS
Q3U9G2;Q3TWF2;P20029;Q9DC41;Q3TKF8;Q3TI47;Q3U7T8;Q3U6V3;Q3UEM8;Q3TUS2	Q3U9G2;Q3TWF2;P20029;Q9DC41;Q3TKF8;Q3TI47;Q3U7T8;Q3U6V3;Q3UEM8	25;25;25;24;24;24;23;22;20;8	25;25;25;24;24;24;23;22;20;8	23;23;23;22;22;22;21;20;18;8	78 kDa glucose-regulated protein	Hspa5	;;;;;;;;	10	25	25	23	13	7	19	2	19	17	21	8	11	13	7	19	2	19	17	21	8	11	11	7	17	2	17	15	19	6	9	47.6	47.6	46	72.405	655	655;655;655;655;655;655;619;655;520;236	0	146.84	By MS/MS	By MS/MS	By MS/MS
Q8C5B4;E9PV85;Q61297;Q61298	Q8C5B4;E9PV85	25;16;8;7	1;0;0;1	1;0;0;1	Alpha-amylase	Amy2a1	;	4	25	1	1	19	21	20	11	11	9	17	21	16	1	1	1	1	1	1	1	1	1	1	1	1	1	1	1	1	1	1	61.2	2.6	2.6	57.336	508	508;245;232;242	0	7.7055	By MS/MS	By MS/MS	By MS/MS
P00688;Q61299	P00688	25;5	25;5	1;1	Pancreatic alpha-amylase	Amy2		2	25	25	1	19	21	20	10	11	9	17	21	16	19	21	20	10	11	9	17	21	16	1	1	1	0	1	1	1	1	1	61.2	61.2	2.6	57.318	508	508;179	0	323.31	By MS/MS	By MS/MS	By MS/MS
[truncated: 72 more columns]

## Sheet: 1EG-1
Protein IDs	Majority protein IDs	Peptide counts (all)	Peptide counts (razor+unique)	Peptide counts (unique)	Protein names	Gene names	Fasta headers	Number of proteins	Peptides	Razor + unique peptides	Unique peptides	Peptides 1EG-1	Peptides 1EG-2	Peptides 1EG-3	Peptides 2EG-1	Peptides 2EG-2	Peptides 2EG-3	Peptides Normal-1	Peptides Normal-2	Peptides Normal-3	Razor + unique peptides 1EG-1	Razor + unique peptides 1EG-2	Razor + unique peptides 1EG-3	Razor + unique peptides 2EG-1	Razor + unique peptides 2EG-2	Razor + unique peptides 2EG-3	Razor + unique peptides Normal-1	Razor + unique peptides Normal-2	Razor + unique peptides Normal-3	Unique peptides 1EG-1	Unique peptides 1EG-2	Unique peptides 1EG-3	Unique peptides 2EG-1	Unique peptides 2EG-2	Unique peptides 2EG-3	Unique peptides Normal-1	Unique peptides Normal-2	Unique peptides Normal-3	Sequence coverage [%]	Unique + razor sequence coverage [%]	Unique sequence coverage [%]	Mol. weight [kDa]	Sequence length	Sequence lengths	Q-value	Score	Identification type 1EG-1	Identification type 1EG-2	Identification type 1EG-3
Q3UEK0;Q9Z0K8	Q3UEK0;Q9Z0K8	1;1	1;1	1;1	Pantetheinase	Vnn1	;	2	1	1	1	1	1	1	1	1	1	1	1	1	1	1	1	1	1	1	1	1	1	1	1	1	1	1	1	1	1	1	4	4	4	36.775	328	328;512	0	26.693	By MS/MS	By matching	By MS/MS
Q4FJS7;Q3TBR2;Q3TDB9;Q3U3V1;O88947	Q4FJS7;Q3TBR2;Q3TDB9;Q3U3V1;O88947	2;2;2;2;2	2;2;2;2;2	2;2;2;2;2	Coagulation factor X;Factor X light chain;Factor X heavy chain;Activated factor Xa heavy chain	F10	;;;;	5	2	2	2	1	1	0	1	1	2	0	0	2	1	1	0	1	1	2	0	0	2	1	1	0	1	1	2	0	0	2	3.7	3.7	3.7	54.003	481	481;481;492;493;481	0	2.2891	By MS/MS	By MS/MS
D3Z6E4;Q922A0;Q545V3;Q3UJ20;P17183;D3YVD3;D3Z2S4;A0A0N4SUX5;A0A0N4SUI6;B1ARR6;A0A0N4SUW8;Q5SX61;Q5SX60;Q5SX59;Q4FK59;P21550	D3Z6E4;Q922A0;Q545V3;Q3UJ20;P17183;D3YVD3;D3Z2S4;A0A0N4SUX5;A0A0N4SUI6;B1ARR6	4;4;4;4;4;3;3;3;2;2;1;1;1;1;1;1	2;2;2;2;2;1;1;1;0;0;0;0;0;0;0;0	2;2;2;2;2;1;1;1;0;0;0;0;0;0;0;0	Enolase;Gamma-enolase	Eno2;Eno1	;;;;;;;;;	16	4	2	2	1	1	3	1	2	2	3	1	0	0	0	1	0	1	1	1	0	0	0	0	1	0	1	1	1	0	0	20.3	10.5	10.5	34.804	315	315;338;434;434;434;122;162;391;58;67;37;70;80;196;434;434	0.0023256	1.9265	By matching	By matching	By matching
Q3V206	Q3V206	1	1	1		Ptrh1		1	1	1	1	1	1	1	1	1	1	0	1	1	1	1	1	1	1	1	0	1	1	1	1	1	1	1	1	0	1	1	7.2	7.2	7.2	22.047	209	209	0.0098232	1.0891	By matching	By matching	By matching
A0A0J9YUH8	A0A0J9YUH8	1	1	1				1	1	1	1	1	1	1	1	1	1	1	1	1	1	1	1	1	1	1	1	1	1	1	1	1	1	1	1	1	1	1	11	11	11	8.8338	73	73	0.0099206	1.1334	By MS/MS	By MS/MS	By MS/MS
A0A0A6YWU2;E9Q589;A0A0A6YY47;E9QB01;P13595-4;P13595-3;P13595-2;P13595;A0A0A6YY91	A0A0A6YWU2;E9Q589;A0A0A6YY47;E9QB01;P13595-4;P13595-3;P13595-2;P13595;A0A0A6YY91	3;3;3;3;3;3;3;3;2	3;3;3;3;3;3;3;3;2	3;3;3;3;3;3;3;3;2	Neural cell adhesion molecule 1	Ncam1	;;;;;;;;	9	3	3	3	1	1	0	1	2	1	0	1	2	1	1	0	1	2	1	0	1	2	1	1	0	1	2	1	0	1	2	7.3	7.3	7.3	67.305	605	605;725;848;849;605;725;848;1115;1089	0	5.6582	By MS/MS	By MS/MS
D6RI51;Q9JLT2	D6RI51;Q9JLT2	1;1	1;1	1;1	Trehalase	Treh	;	2	1	1	1	1	1	1	0	1	1	1	1	1	1	1	1	0	1	1	1	1	1	1	1	1	0	1	1	1	1	1	4.7	4.7	4.7	17.255	150	150;576	0.006263	1.2734	By MS/MS	By matching	By MS/MS
Q8BUY8	Q8BUY8	1	1	1	G-protein coupled receptor-associated sorting protein 2	Gprasp2		1	1	1	1	1	0	1	0	0	1	1	1	1	1	0	1	0	0	1	1	1	1	1	0	1	0	0	1	1	1	1	1.9	1.9	1.9	92.801	826	826	0.006135	1.2271	By MS/MS		By MS/MS
B2RSN3;Q9CWF2;Q7TMM9;Q99J49;G3UZR1;Q62363;D5MR34	B2RSN3;Q9CWF2;Q7TMM9;Q99J49	11;11;11;8;2;1;1	1;1;1;1;0;0;0	1;1;1;1;0;0;0	Tubulin beta-2B chain;Tubulin beta-2A chain	Tubb2b;Tubb2a	;;;	7	11	1	1	1	4	4	2	8	8	7	2	3	0	0	0	0	0	1	1	0	1	0	0	0	0	0	1	1	0	1	36.9	3.4	3.4	49.953	445	445;445;445;298;67;100;133	0	3.9446	By matching	By matching	By matching
Q642I5;Q9DBB9	Q642I5;Q9DBB9	1;1	1;1	1;1	Carboxypeptidase N subunit 2	Cpn2	;	2	1	1	1	1	1	1	1	1	1	1	1	1	1	1	1	1	1	1	1	1	1	1	1	1	1	1	1	1	1	1	1.9	1.9	1.9	45.709	413	413;547	0.0097656	1.0675	By MS/MS	By matching	By MS/MS
A0A087WP24;A0A087WRJ2;A0A087WPF8;A0A087WQN8;A0A087WSR2;E9QN99;Q8VCR7	A0A087WP24;A0A087WRJ2;A0A087WPF8;A0A087WQN8;A0A087WSR2;E9QN99;Q8VCR7	1;1;1;1;1;1;1	1;1;1;1;1;1;1	1;1;1;1;1;1;1	Alpha/beta hydrolase domain-containing protein 14B	Abhd14b	;;;;;;	7	1	1	1	1	1	0	1	1	1	1	1	0	1	1	0	1	1	1	1	1	0	1	1	0	1	1	1	1	1	0	7.7	7.7	7.7	14.948	142	142;151;174;183;194;210;210	0.0064378	1.3555	By matching	By matching
Q8CG46-2;Q8CG46	Q8CG46-2;Q8CG46	1;1	1;1	1;1	Structural maintenance of chromosomes protein 5	Smc5	;	2	1	1	1	1	1	1	0	1	1	1	1	1	1	1	1	0	1	1	1	1	1	1	1	1	0	1	1	1	1	1	1	1	1	127.38	1087	1087;1101	1	-2	By matching	By matching	By matching
Q3UUX9;Q3TIY6;Q3UC72;Q3UPA3;Q61598-2;Q61598;Q9CZ18	Q3UUX9;Q3TIY6;Q3UC72;Q3UPA3;Q61598-2;Q61598	9;9;9;9;9;9;3	5;5;5;5;5;5;1	5;5;5;5;5;5;1	Rab GDP dissociation inhibitor beta	Gdi2	;;;;;	7	9	5	5	1	0	5	0	5	2	7	2	2	1	0	3	0	2	1	4	2	2	1	0	3	0	2	1	4	2	2	25.4	12.6	12.6	50.507	445	445;445;509;512;409;445;230	0	9.5911	By matching		By matching
Q3TLL6;Q4FZL1;Q5F2A7;Q3UXC2;Q3TGK7;Q3TFG3;P60843;Q3TSJ4;Q78WR5;Q3U8I0;Q8BTU6;Q52KC1;P10630;P10630-2;E9Q561	Q3TLL6;Q4FZL1;Q5F2A7;Q3UXC2;Q3TGK7;Q3TFG3;P60843;Q3TSJ4;Q78WR5;Q3U8I0;Q8BTU6;Q52KC1;P10630;P10630-2;E9Q561	4;4;4;4;4;4;4;3;3;3;3;3;3;3;2	4;4;4;4;4;4;4;3;3;3;3;3;3;3;2	4;4;4;4;4;4;4;3;3;3;3;3;3;3;2	Eukaryotic initiation factor 4A-I;Eukaryotic initiation factor 4A-II;Eukaryotic initiation factor 4A-II, N-terminally processed	Eif4a1;Eif4a2	;;;;;;;;;;;;;;	15	4	4	4	1	0	2	0	1	1	4	2	2	1	0	2	0	1	1	4	2	2	1	0	2	0	1	1	4	2	2	14.3	14.3	14.3	41.49	364	364;405;406;406;406;406;406;225;236;286;362;407;407;408;312	0	9.3588	By matching		By MS/MS
P97807-2;P97807;H3BKG7	P97807-2;P97807	5;5;2	5;5;2	5;5;2	Fumarate hydratase, mitochondrial	Fh	;	3	5	5	5	1	1	1	1	4	2	2	0	0	1	1	1	1	4	2	2	0	0	1	1	1	1	4	2	2	0	0	21.8	21.8	21.8	50.052	467	467;507;167	0	14.183	By matching	By matching	By matching
S4R2B5;Q6R6I7	S4R2B5;Q6R6I7	1;1	1;1	1;1	Relaxin receptor 1	Rxfp1	;	2	1	1	1	1	1	1	1	1	1	1	1	1	1	1	1	1	1	1	1	1	1	1	1	1	1	1	1	1	1	1	13.7	13.7	13.7	11.191	102	102;758	0.0096154	1.0389	By MS/MS	By matching	By matching
A6H6Q4	A6H6Q4	1	1	1	Uncharacterized protein C19orf71 homolog			1	1	1	1	1	1	1	1	1	1	1	1	1	1	1	1	1	1	1	1	1	1	1	1	1	1	1	1	1	1	1	4.4	4.4	4.4	23.954	206	206	1	-2	By MS/MS	By MS/MS	By matching
P99024;Q80ZV2	P99024	13;5	4;1	3;1	Tubulin beta-5 chain	Tubb5		2	13	4	3	1	5	5	4	9	9	7	2	2	0	1	2	2	2	3	2	0	0	0	1	1	2	1	2	1	0	0	45.7	15.5	12.2	49.67	444	444;186	0	4.6421	By matching	By matching	By MS/MS
Q8VC94;A2BH06;E9PZB3;E9PYL9;Q9CXW4	Q8VC94;A2BH06;E9PZB3;E9PYL9;Q9CXW4	2;2;2;2;2	2;2;2;2;2	2;2;2;2;2	60S ribosomal protein L11	Rpl11;Gm5093;Gm10036	;;;;	5	2	2	2	1	1	2	1	1	2	2	0	0	1	1	2	1	1	2	2	0	0	1	1	2	1	1	2	2	0	0	12.6	12.6	12.6	19.024	167	167;172;174;178;178	0	5.3635	By matching	By matching	By MS/MS
A2A5K2;Q4FJT5;Q3UFS5;P55065	A2A5K2;Q4FJT5;Q3UFS5;P55065	1;1;1;1	1;1;1;1	1;1;1;1	Phospholipid transfer protein	Pltp	;;;	4	1	1	1	1	1	0	1	1	1	0	1	0	1	1	0	1	1	1	0	1	0	1	1	0	1	1	1	0	1	0	3.2	3.2	3.2	49.022	441	441;493;493;493	0	4.8226	By MS/MS	By MS/MS
P50396;D6RI86;B7FAU8	P50396	9;3;2	9;3;2	5;1;1	Rab GDP dissociation inhibitor alpha	Gdi1		3	9	9	5	1	1	5	1	6	2	6	0	0	1	1	5	1	6	2	6	0	0	1	1	3	1	3	1	3	0	0	32.2	32.2	19.5	50.521	447	447;78;149	0	107.35	By matching	By matching	By matching
G3UY13;Q3UEL3;E9Q6I2;Q3V2X3;Q3UVZ1;Q61730-2;Q61730;Q61730-3	G3UY13;Q3UEL3;E9Q6I2;Q3V2X3;Q3UVZ1;Q61730-2;Q61730;Q61730-3	2;2;2;2;2;2;2;2	2;2;2;2;2;2;2;2	2;2;2;2;2;2;2;2	Interleukin-1 receptor accessory protein	Il1rap	;;;;;;;	8	2	2	2	1	2	1	1	1	1	1	1	1	1	2	1	1	1	1	1	1	1	1	2	1	1	1	1	1	1	1	5.5	5.5	5.5	39.881	346	346;360;640;685;685;360;570;685	0	2.238	By MS/MS	By MS/MS	By matching
Q91VL4;Q3TP88;Q3TUE2;Q3TX57;Q3TU64;Q01149	Q91VL4;Q3TP88;Q3TUE2;Q3TX57;Q3TU64;Q01149	4;4;4;4;4;4	4;4;4;4;4;4	4;4;4;4;4;4	Collagen alpha-2(I) chain	Col1a2	;;;;;	6	4	4	4	1	2	2	2	1	1	3	3	3	1	2	2	2	1	1	3	3	3	1	2	2	2	1	1	3	3	3	9.5	9.5	9.5	56.662	566	566;959;1241;1372;1372;1372	0	20.89	By MS/MS	By MS/MS	By matching
Q1A602;Q3ULT2;Q3UDJ7;P57780;A1BN54;Q7TPR4;E9Q2W9;Q8BP35;D3Z0L8;O88990;D3Z761;Q99LJ3;Q8K3Q4;Q5FW75;Q9JI91;Q61063;Q61064	Q1A602;Q3ULT2;Q3UDJ7;P57780;A1BN54;Q7TPR4;E9Q2W9	10;10;10;10;7;7;6;3;3;3;2;2;2;2;2;1;1	10;10;10;10;7;7;6;3;3;3;2;2;2;2;2;1;1	10;10;10;10;7;7;6;3;3;3;2;2;2;2;2;1;1	Alpha-actinin-4;Alpha-actinin-1	Actn4;Actn1	;;;;;;	17	10	10	10	1	2	7	3	3	1	7	0	1	1	2	7	3	3	1	7	0	1	1	2	7	3	3	1	7	0	1	13.5	13.5	13.5	104.91	911	911;912;912;912;887;892;518;202;206;900;133;400;894;894;894;72;109	0	23.688	By matching	By MS/MS	By MS/MS
Q2T9H5;Q9QZ25	Q2T9H5;Q9QZ25	1;1	1;1	1;1	Vascular non-inflammatory molecule 3	Vnn3	;	2	1	1	1	1	1	1	1	1	1	1	1	1	1	1	1	1	1	1	1	1	1	1	1	1	1	1	1	1	1	1	2.4	2.4	2.4	56.229	500	500;500	0	4.3077	By MS/MS	By MS/MS	By MS/MS
P16125;Q5M8R7;D3Z7F0;A0A0N4SVV8;D3YVR7;D3YZE4;Q64483;Q548Z6;P00342	P16125;Q5M8R7;D3Z7F0	6;3;3;2;1;1;1;1;1	6;3;3;2;1;1;1;1;1	5;3;2;1;0;0;0;0;0	L-lactate dehydrogenase B chain;L-lactate dehydrogenase	Ldhb	;;	9	6	6	5	1	3	2	3	3	4	1	2	1	1	3	2	3	3	4	1	2	1	1	3	1	3	3	3	0	1	0	22.5	22.5	18.9	36.572	334	334;101;198;193;235;237;332;332;332	0	11.82	By MS/MS	By MS/MS	By MS/MS
D3YXH9;E9QL22;Q3U1C6-2;Q3U1C6	D3YXH9;E9QL22;Q3U1C6-2;Q3U1C6	1;1;1;1	1;1;1;1	1;1;1;1	Putative deoxyribonuclease TATDN3	Tatdn3	;;;	4	1	1	1	1	1	1	1	1	1	1	1	1	1	1	1	1	1	1	1	1	1	1	1	1	1	1	1	1	1	1	5.8	5.8	5.8	32.279	293	293;294;290;294	0.0097087	1.0518	By MS/MS	By MS/MS	By MS/MS
H7BWY6;Q00724;Q3TF08	H7BWY6;Q00724;Q3TF08	2;2;1	2;2;1	2;2;1	Retinol-binding protein 4	Rbp4	;;	3	2	2	2	1	1	0	1	1	1	1	2	1	1	1	0	1	1	1	1	2	1	1	1	0	1	1	1	1	2	1	11.8	11.8	11.8	28.405	245	245;201;174	0	4.4824	By MS/MS	By matching
Q9Z1R3	Q9Z1R3	1	1	1	Apolipoprotein M	Apom		1	1	1	1	1	1	0	1	1	1	1	1	1	1	1	0	1	1	1	1	1	1	1	1	0	1	1	1	1	1	1	7.9	7.9	7.9	21.273	190	190	0	12.343	By matching	By MS/MS
Q4ZJN6;D3YZ61;Q9ES30	Q4ZJN6;D3YZ61;Q9ES30	1;1;1	1;1;1	1;1;1	Complement C1q tumor necrosis factor-related protein 3	C1qtnf3	;;	3	1	1	1	1	1	0	1	1	1	0	1	0	1	1	0	1	1	1	0	1	0	1	1	0	1	1	1	0	1	0	4.5	4.5	4.5	26.828	246	246;319;246	0	7.3113	By matching	By MS/MS
O35490	O35490	1	1	1	Betaine--homocysteine S-methyltransferase 1	Bhmt		1	1	1	1	1	1	0	1	1	1	0	1	0	1	1	0	1	1	1	0	1	0	1	1	0	1	1	1	0	1	0	3.9	3.9	3.9	45.02	407	407	0	3.4603	By matching	By MS/MS
P47880	P47880	1	1	1	Insulin-like growth factor-binding protein 6	Igfbp6		1	1	1	1	1	1	0	1	1	1	0	0	0	1	1	0	1	1	1	0	0	0	1	1	0	1	1	1	0	0	0	6.3	6.3	6.3	25.346	238	238	0	25.741	By matching	By MS/MS
B2RU80	B2RU80	1	1	1	Receptor-type tyrosine-protein phosphatase beta	Ptprb		1	1	1	1	1	1	0	1	1	1	0	1	1	1	1	0	1	1	1	0	1	1	1	1	0	1	1	1	0	1	1	1.1	1.1	1.1	224.49	1998	1998	0.0061983	1.2476	By MS/MS	By MS/MS
Q64374	Q64374	2	2	2	Regucalcin	Rgn		1	2	2	2	1	1	0	1	2	2	1	1	1	1	1	0	1	2	2	1	1	1	1	1	0	1	2	2	1	1	1	9.4	9.4	9.4	33.406	299	299	0	13.924	By MS/MS	By MS/MS
B9EKB8;B7ZWC4;Q07113;Q8K0J1;Q8C2F9	B9EKB8;B7ZWC4;Q07113	3;3;3;1;1	3;3;3;1;1	3;3;3;1;1	Cation-independent mannose-6-phosphate receptor	Igf2r	;;	5	3	3	3	1	2	0	3	2	1	0	2	1	1	2	0	3	2	1	0	2	1	1	2	0	3	2	1	0	2	1	1.7	1.7	1.7	273.81	2483	2483;2483;2483;876;1282	0	19.976	By MS/MS	By MS/MS
Q9CX41;Q6KAN9;D3Z2X2	Q9CX41;Q6KAN9;D3Z2X2	1;1;1	1;1;1	1;1;1		Dnhd1;mFLJ00251	;;	3	1	1	1	1	1	0	1	1	1	0	1	0	1	1	0	1	1	1	0	1	0	1	1	0	1	1	1	0	1	0	6	6	6	33.141	285	285;1029;4750	1	-2	By MS/MS	By MS/MS
A2A4I8;A2A4I9;O70423-2;Q812C9;O70423	A2A4I8;A2A4I9;O70423-2;Q812C9;O70423	2;2;2;2;2	2;2;2;2;2	2;2;2;2;2	Amine oxidase;Membrane primary amine oxidase;Retina-specific copper amine oxidase	Aoc3;Aoc2	;;;;	5	2	2	2	1	2	0	2	1	1	0	0	0	1	2	0	2	1	1	0	0	0	1	2	0	2	1	1	0	0	0	3.8	3.8	3.8	52.848	470	470;730;629;757;765	0	3.9101	By MS/MS	By MS/MS
Q3UN43;Q4KMV6;Q571D8;Q3U325;Q80XQ2	Q3UN43;Q4KMV6;Q571D8;Q3U325;Q80XQ2	1;1;1;1;1	1;1;1;1;1	1;1;1;1;1	TBC1 domain family member 5	Tbc1d5	;;;;	5	1	1	1	1	1	1	0	1	1	1	1	1	1	1	1	0	1	1	1	1	1	1	1	1	0	1	1	1	1	1	1.3	1.3	1.3	62.176	544	544;653;821;837;815	1	-2	By matching	By matching	By matching
Q9JKR6;Q8VCI2;F6TRP3;E0CYZ2	Q9JKR6	15;7;3;2	15;7;3;2	15;7;3;2	Hypoxia up-regulated protein 1	Hyou1		4	15	15	15	1	1	4	0	5	2	12	0	2	1	1	4	0	5	2	12	0	2	1	1	4	0	5	2	12	0	2	23.3	23.3	23.3	111.18	999	999;504;227;172	0	26.279	By MS/MS	By matching	By matching
B1AZS9;O08807	B1AZS9;O08807	2;2	1;1	1;1	Peroxiredoxin-4	Prdx4	;	2	2	1	1	1	0	1	0	1	2	1	0	1	0	0	0	0	1	1	0	0	0	0	0	0	0	1	1	0	0	0	8.3	4.8	4.8	26.391	229	229;274	0.0097276	1.0521	By matching		By matching
Q3TND1;P45878;Q3UND3	Q3TND1;P45878;Q3UND3	2;2;1	2;2;1	2;2;1	Peptidyl-prolyl cis-trans isomerase;Peptidyl-prolyl cis-trans isomerase FKBP2	Fkbp2	;;	3	2	2	2	1	0	1	0	2	2	2	0	1	1	0	1	0	2	2	2	0	1	1	0	1	0	2	2	2	0	1	18.6	18.6	18.6	15.344	140	140;140;140	0	11.962	By matching		By matching
Q3TG17;H3BLL4;B2M1R6;Q3U9Q3;Q3U6X2;Q3TUA1;Q3TJ38;Q5FWJ5;Q3TL71;P61979-3;P61979;P61979-2;H3BLP7;D3Z5X4;D3YWG1;H3BK96;H3BKD0	Q3TG17;H3BLL4;B2M1R6;Q3U9Q3;Q3U6X2;Q3TUA1;Q3TJ38;Q5FWJ5;Q3TL71;P61979-3;P61979;P61979-2;H3BLP7;D3Z5X4;D3YWG1	3;3;3;3;3;3;3;3;3;3;3;3;2;2;2;1;1	3;3;3;3;3;3;3;3;3;3;3;3;2;2;2;1;1	3;3;3;3;3;3;3;3;3;3;3;3;2;2;2;1;1	Heterogeneous nuclear ribonucleoprotein K	Hnrnpk;Gm7964	;;;;;;;;;;;;;;	17	3	3	3	1	0	1	0	2	3	1	0	0	1	0	1	0	2	3	1	0	0	1	0	1	0	2	3	1	0	0	13.7	13.7	13.7	43.254	394	394;394;440;450;459;463;463;464;464;439;463;464;210;439;463;257;299	0	25.31	By matching		By matching
Q61171;D3Z4A4;Q5M9N9	Q61171;D3Z4A4;Q5M9N9	5;3;3	5;3;3	5;3;3	Peroxiredoxin-2	Prdx2	;;	3	5	5	5	1	1	2	0	2	2	2	1	0	1	1	2	0	2	2	2	1	0	1	1	2	0	2	2	2	1	0	39.9	39.9	39.9	21.778	198	198;147;198	0	16.723	By matching	By matching	By MS/MS
A1L0U6;A2AS98;P28660-2;P28660	A1L0U6;A2AS98;P28660-2;P28660	1;1;1;1	1;1;1;1	1;1;1;1	Nck-associated protein 1	Nckap1	;;;	4	1	1	1	1	1	1	0	1	1	1	1	1	1	1	1	0	1	1	1	1	1	1	1	1	0	1	1	1	1	1	0.8	0.8	0.8	129.38	1133	1133;1134;1037;1128	0.0080483	1.1916	By MS/MS	By matching	By MS/MS
P35700;B1AXW5;B1AXW6;Q3U9J9;B1AXW4	P35700;B1AXW5;B1AXW6;Q3U9J9	7;6;6;6;3	7;6;6;6;3	6;5;5;5;3	Peroxiredoxin-1	Prdx1	;;;	5	7	7	6	1	0	4	0	3	4	6	1	3	1	0	4	0	3	4	6	1	3	0	0	3	0	3	3	5	1	2	41.2	41.2	37.2	22.176	199	199;170;176;199;123	0	11.904	By matching		By MS/MS
P14152;B1ATQ3	P14152	10;2	10;2	10;2	Malate dehydrogenase, cytoplasmic	Mdh1		2	10	10	10	1	0	7	0	7	6	9	2	4	1	0	7	0	7	6	9	2	4	1	0	7	0	7	6	9	2	4	29.9	29.9	29.9	36.511	334	334;156	0	19.896	By matching		By MS/MS
P62204;Q3UKW2;Q9D6P8;G3UX57	P62204;Q3UKW2;Q9D6P8	7;6;4;1	7;6;4;1	7;6;4;1	Calmodulin;Calmodulin-like protein 3	Calm1;Calml3	;;	4	7	7	7	1	0	3	0	4	6	5	2	3	1	0	3	0	4	6	5	2	3	1	0	3	0	4	6	5	2	3	50.3	50.3	50.3	16.837	149	149;197;149;39	0	53.836	By matching		By MS/MS
P12968	P12968	1	1	1	Islet amyloid polypeptide	Iapp		1	1	1	1	1	0	1	0	1	1	0	0	0	1	0	1	0	1	1	0	0	0	1	0	1	0	1	1	0	0	0	7.5	7.5	7.5	10.022	93	93	0.0061728	1.2365	By MS/MS		By MS/MS
B1B0C7;E9PZ16;Q52KG8;Q5RKM8;Q3UHH3;Q05793	B1B0C7;E9PZ16;Q52KG8;Q5RKM8;Q3UHH3;Q05793	2;2;1;1;1;1	2;2;1;1;1;1	2;2;1;1;1;1	Basement membrane-specific heparan sulfate proteoglycan core protein;Endorepellin;LG3 peptide	Hspg2	;;;;;	6	2	2	2	1	1	0	0	1	1	0	0	1	1	1	0	0	1	1	0	0	1	1	1	0	0	1	1	0	0	1	0.6	0.6	0.6	469.02	4375	4375;4383;834;1100;2672;3707	0.0023585	2.008	By matching	By matching
E0CZ27;A1L0U3;F8WI35;A1L0V4;B9EI85;P84244;P84228;P68433;P02301;E0CYN1;E0CYR7	E0CZ27;A1L0U3;F8WI35;A1L0V4;B9EI85;P84244;P84228;P68433;P02301	3;3;3;3;3;3;3;3;3;1;1	3;3;3;3;3;3;3;3;3;1;1	3;3;3;3;3;3;3;3;3;1;1	Histone H3;Histone H3.3;Histone H3.2;Histone H3.1;Histone H3.3C	H3f3a;Hist1h3e;Hist1h3i;Hist2h3b;Hist1h3b;Hist1h3a;H3f3c	;;;;;;;;	11	3	3	3	1	1	3	1	0	1	3	0	1	1	1	3	1	0	1	3	0	1	1	1	3	1	0	1	3	0	1	19.3	19.3	19.3	13.322	119	119;133;135;135;136;136;136;136;136;52;55	0	2.18	By MS/MS	By matching	By MS/MS
Q5RKP0;Q499X4;Q3TXD3;Q62465;Q3U331	Q5RKP0;Q499X4;Q3TXD3;Q62465;Q3U331	4;4;4;4;3	4;4;4;4;3	4;4;4;4;3	Synaptic vesicle membrane protein VAT-1 homolog	Vat1	;;;;	5	4	4	4	1	0	1	0	0	1	4	0	0	1	0	1	0	0	1	4	0	0	1	0	1	0	0	1	4	0	0	15	15	15	42.521	401	401;406;406;406;406	0	8.9319	By matching		By matching
B2CY77;P14206	B2CY77;P14206	3;3	3;3	3;3	40S ribosomal protein SA	Rpsa	;	2	3	3	3	1	0	2	0	0	2	2	1	1	1	0	2	0	0	2	2	1	1	1	0	2	0	0	2	2	1	1	17.6	17.6	17.6	32.85	295	295;295	0	15.808	By matching		By MS/MS
A4FUS1;Q641N3;Q5CZY9;P14131	A4FUS1;Q641N3;Q5CZY9;P14131	1;1;1;1	1;1;1;1	1;1;1;1	40S ribosomal protein S16	Rps16	;;;	4	1	1	1	1	0	1	0	0	1	1	0	1	1	0	1	0	0	1	1	0	1	1	0	1	0	0	1	1	0	1	6.8	6.8	6.8	16.445	146	146;157;172;146	0.0065789	1.4913	By matching		By MS/MS
Q4FK36;Q9R0P5	Q4FK36;Q9R0P5	4;4	4;4	4;4	Destrin	Dstn	;	2	4	4	4	1	0	3	0	0	2	4	0	0	1	0	3	0	0	2	4	0	0	1	0	3	0	0	2	4	0	0	29.1	29.1	29.1	18.521	165	165;165	0	5.419	By matching		By MS/MS
P08249;A0A0G2JF23;A0A0G2JGY4	P08249;A0A0G2JF23	7;4;3	7;4;3	7;4;3	Malate dehydrogenase, mitochondrial	Mdh2	;	3	7	7	7	1	0	5	0	0	1	4	0	1	1	0	5	0	0	1	4	0	1	1	0	5	0	0	1	4	0	1	26.6	26.6	26.6	35.611	338	338;199;153	0	8.6533	By MS/MS		By MS/MS
Q91XI2;Q542K4;Q3TVZ1;A2AL20;Q8C6E3;Q3UZE7;P24270	Q91XI2;Q542K4;Q3TVZ1;A2AL20;Q8C6E3;Q3UZE7;P24270	2;2;2;1;1;1;1	2;2;2;1;1;1;1	2;2;2;1;1;1;1	Catalase	Cat	;;;;;;	7	2	2	2	1	0	2	0	1	0	0	0	0	1	0	2	0	1	0	0	0	0	1	0	2	0	1	0	0	0	0	6.5	6.5	6.5	59.738	527	527;527;527;176;527;527;527	0	4.3119	By MS/MS		By MS/MS
A0A0G2JDL9;Q52L50;Q3U7U8;C5H0E9;C5H0E8;Q99JI6;P62835	A0A0G2JDL9;Q52L50;Q3U7U8;C5H0E9;C5H0E8;Q99JI6;P62835	1;1;1;1;1;1;1	1;1;1;1;1;1;1	1;1;1;1;1;1;1	Ras-related protein Rap-1b;Ras-related protein Rap-1A	Rap1b;Rap1a;Gm9392	;;;;;;	7	1	1	1	1	1	0	1	1	0	0	0	0	1	1	0	1	1	0	0	0	0	1	1	0	1	1	0	0	0	0	10.2	10.2	10.2	13.426	118	118;184;184;184;184;184;184	0	2.3352	By matching	By matching
O88200	O88200	1	1	1	C-type lectin domain family 11 member A	Clec11a		1	1	1	1	1	1	0	1	1	0	0	0	0	1	1	0	1	1	0	0	0	0	1	1	0	1	1	0	0	0	0	5.2	5.2	5.2	36.451	328	328	0	3.6272	By matching	By MS/MS
Q3V0F6	Q3V0F6	2	2	2		Gm7337		1	2	2	2	1	0	1	1	0	0	1	1	1	1	0	1	1	0	0	1	1	1	1	0	1	1	0	0	1	1	1	9.9	9.9	9.9	44.925	385	385	1	-2	By matching		By matching
A0A140LIN9;Q8BW94-2;Q8BW94	A0A140LIN9;Q8BW94-2;Q8BW94	1;1;1	1;1;1	1;1;1	Dynein heavy chain 3, axonemal	Dnah3	;;	3	1	1	1	1	1	0	1	0	0	0	0	0	1	1	0	1	0	0	0	0	0	1	1	0	1	0	0	0	0	0	0.4	0.4	0.4	382.62	3351	3351;3957;4083	0.0098425	1.1025	By MS/MS	By matching
Q8R593	Q8R593	1	1	1		Rchy1		1	1	1	1	1	1	0	1	0	0	0	1	1	1	1	0	1	0	0	0	1	1	1	1	0	1	0	0	0	1	1	3.8	3.8	3.8	29.988	261	261	0.0060852	1.2024	By matching	By MS/MS
Q61595-2;Q61595-12;Q61595-16;Q61595-3;Q61595-14;Q61595-6;Q61595-4;Q61595-9;Q61595-8;Q61595-13;Q61595-5;Q61595-15;Q61595-10;Q61595-7;Q61595-11;Q61595	Q61595-2;Q61595-12;Q61595-16;Q61595-3;Q61595-14;Q61595-6;Q61595-4;Q61595-9;Q61595-8;Q61595-13;Q61595-5;Q61595-15;Q61595-10;Q61595-7;Q61595-11;Q61595	1;1;1;1;1;1;1;1;1;1;1;1;1;1;1;1	1;1;1;1;1;1;1;1;1;1;1;1;1;1;1;1	1;1;1;1;1;1;1;1;1;1;1;1;1;1;1;1	Kinectin	Ktn1	;;;;;;;;;;;;;;;	16	1	1	1	1	1	0	1	0	0	0	0	0	1	1	0	1	0	0	0	0	0	1	1	0	1	0	0	0	0	0	1.7	1.7	1.7	137.68	1200	1200;1223;1224;1228;1229;1247;1247;1252;1252;1253;1275;1275;1275;1280;1304;1327	1	-2	By matching	By MS/MS
A2ASS6-3;F7CR78	A2ASS6-3;F7CR78	2;1	2;1	1;0	Titin	Ttn	;	2	2	2	1	1	1	0	1	0	0	0	1	2	1	1	0	1	0	0	0	1	2	1	1	0	1	0	0	0	1	1	0.5	0.5	0.3	619.32	5508	5508;8272	0.0063158	1.2957	By MS/MS	By MS/MS
Q8K441	Q8K441	1	1	1	ATP-binding cassette sub-family A member 6	Abca6		1	1	1	1	1	1	0	1	0	0	0	0	0	1	1	0	1	0	0	0	0	0	1	1	0	1	0	0	0	0	0	0.8	0.8	0.8	183.28	1624	1624	0.0064655	1.3771	By MS/MS	By MS/MS
Q3TE53;Q3UHP6;P59672;P59672-2	Q3TE53;Q3UHP6;P59672;P59672-2	1;1;1;1	1;1;1;1	1;1;1;1	Ankyrin repeat and SAM domain-containing protein 1A	Anks1;Anks1a	;;;	4	1	1	1	1	0	1	0	0	0	1	0	0	1	0	1	0	0	0	1	0	0	1	0	1	0	0	0	1	0	0	2.6	2.6	2.6	55.056	494	494;1189;1150;1168	1	-2	By matching		By matching
Q3UN37;B2RVF4;H3BKF1;E9PYM1;E9Q0Z5;D3YWC7	Q3UN37;B2RVF4;H3BKF1;E9PYM1;E9Q0Z5;D3YWC7	1;1;1;1;1;1	1;1;1;1;1;1	1;1;1;1;1;1		Fam47e	;;;;;	6	1	1	1	1	0	1	0	0	0	1	1	1	1	0	1	0	0	0	1	1	1	1	0	1	0	0	0	1	1	1	9.9	9.9	9.9	11.797	101	101;101;121;199;260;402	1	-2	By MS/MS		By matching
G3X9K3	G3X9K3	1	1	1	Brefeldin A-inhibited guanine nucleotide-exchange protein 1	Arfgef1		1	1	1	1	1	0	1	0	0	0	1	1	1	1	0	1	0	0	0	1	1	1	1	0	1	0	0	0	1	1	1	0.8	0.8	0.8	208.5	1846	1846	1	-2	By MS/MS		By matching
A0A097PUD0;A0A097PUG4	A0A097PUD0;A0A097PUG4	4;4	4;4	4;4			;	2	4	4	4	1	0	4	0	0	0	4	1	1	1	0	4	0	0	0	4	1	1	1	0	4	0	0	0	4	1	1	29.4	29.4	29.4	25.616	235	235;238	0	58.592	By matching		By MS/MS
A0A0B6VSQ6;P15947;A0A0U1RPN5;Q7M0B4;P15945	A0A0B6VSQ6;P15947;A0A0U1RPN5	5;5;4;2;2	5;5;4;2;2	5;5;4;2;2	Kallikrein-1	Klk1	;;	5	5	5	5	1	0	5	0	0	0	5	1	3	1	0	5	0	0	0	5	1	3	1	0	5	0	0	0	5	1	3	29.1	29.1	29.1	28.774	261	261;261;151;94;261	0	5.2884	By matching		By MS/MS
Q8R016;E9PY26	Q8R016;E9PY26	2;1	2;1	2;1	Bleomycin hydrolase	Blmh	;	2	2	2	2	1	0	2	0	0	0	1	2	1	1	0	2	0	0	0	1	2	1	1	0	2	0	0	0	1	2	1	5.3	5.3	5.3	52.511	455	455;179	0	8.9551	By matching		By MS/MS
A0A0R4J293;Q9JLF6	A0A0R4J293;Q9JLF6	3;3	3;3	3;3	Protein-glutamine gamma-glutamyltransferase K	Tgm1	;	2	3	3	3	1	0	3	0	0	0	2	1	1	1	0	3	0	0	0	2	1	1	1	0	3	0	0	0	2	1	1	4	4	4	89.795	815	815;815	0.0065076	1.3994	By matching		By MS/MS
Q80U29;Q3TAJ6;B1AR52;F7DC70;B1AR51;P58854	Q80U29;Q3TAJ6;B1AR52;F7DC70;B1AR51;P58854	2;1;1;1;1;1	2;1;1;1;1;1	2;1;1;1;1;1	Gamma-tubulin complex component 3	mKIAA0357;Tubgcp3;Dnahc9;Dnah9	;;;;;	6	2	2	2	1	0	2	0	0	0	2	2	1	1	0	2	0	0	0	2	2	1	1	0	2	0	0	0	2	2	1	1	1	1	169.04	1471	1471;905;1957;1958;4484;905	1	-2	By matching		By MS/MS
Q545V6;P60041	Q545V6;P60041	2;2	2;2	2;2	Somatostatin;Antrin;Somatostatin-28;Somatostatin-14	Sst	;	2	2	2	2	1	0	2	0	0	0	2	0	1	1	0	2	0	0	0	2	0	1	1	0	2	0	0	0	2	0	1	16.4	16.4	16.4	12.745	116	116;116	0	2.4777	By matching		By MS/MS
Q8C2K0;Q5BLK0;Q3TIQ2;P35979;Q6DI58	Q8C2K0;Q5BLK0;Q3TIQ2;P35979;Q6DI58	3;3;3;3;2	3;3;3;3;2	3;3;3;3;2	60S ribosomal protein L12	Rpl12	;;;;	5	3	3	3	1	0	3	0	0	0	3	0	1	1	0	3	0	0	0	3	0	1	1	0	3	0	0	0	3	0	1	25	25	25	17.806	164	164;165;165;165;218	0	6.6165	By matching		By MS/MS
Q0QEW9;Q642K1;Q58EW0;P35980;G3UZJ6;G3UZK4	Q0QEW9;Q642K1;Q58EW0;P35980;G3UZJ6;G3UZK4	2;2;2;2;1;1	2;2;2;2;1;1	2;2;2;2;1;1	60S ribosomal protein L18	Rpl18	;;;;;	6	2	2	2	1	0	2	0	0	0	2	1	1	1	0	2	0	0	0	2	1	1	1	0	2	0	0	0	2	1	1	14.2	14.2	14.2	19.231	169	169;188;188;188;126;136	0.0045351	1.7891	By matching		By MS/MS
Q9D8U3;Q9D8Q5	Q9D8U3;Q9D8Q5	2;1	2;1	2;1	Endoplasmic reticulum resident protein 27	Erp27	;	2	2	2	2	1	0	2	0	0	0	2	0	0	1	0	2	0	0	0	2	0	0	1	0	2	0	0	0	2	0	0	12.5	12.5	12.5	30.693	272	272;107	0	3.7551	By matching		By MS/MS
A0A0U1RPX7;A0A0R4J113;Q5MJ56;P97479-2;P97479	A0A0U1RPX7;A0A0R4J113;Q5MJ56;P97479-2;P97479	1;1;1;1;1	1;1;1;1;1	1;1;1;1;1	Unconventional myosin-VIIa	Myo7a	;;;;	5	1	1	1	1	0	1	0	0	0	1	0	0	1	0	1	0	0	0	1	0	0	1	0	1	0	0	0	1	0	0	0.7	0.7	0.7	249.53	2164	2164;2166;2172;2177;2215	1	-2	By matching		By MS/MS
D3Z6I8;Q8C7C3;Q58E70;Q3TJ53;E9Q7Q3;D3Z2H9;Q8K0Z5;A0A0R4J1P2;E9Q5J9;P21107-2;P21107;D3YVR0;A2AIM5;S4R2U0;G5E8R0;E9Q453;G5E8R2;G5E8R1;E9Q456;E9Q455;E9Q452;Q9D1R6;Q8BSH3;Q8BP43;Q6PJ18;Q61344;Q564G1;Q545Y3;E9Q450;E9Q448;CON__Q3SX28;B7ZNL3;A2AIM4;E9Q454;Q91VH3;F8WID5;P58774-2;P58774;P58771-2;P58771	D3Z6I8;Q8C7C3;Q58E70;Q3TJ53;E9Q7Q3;D3Z2H9;Q8K0Z5;A0A0R4J1P2;E9Q5J9;P21107-2;P21107;D3YVR0;A2AIM5;S4R2U0;G5E8R0;E9Q453;G5E8R2;G5E8R1;E9Q456;E9Q455;E9Q452;Q9D1R6;Q8BSH3;Q8BP43;Q6PJ18;Q61344;Q564G1;Q545Y3;E9Q450;E9Q448;CON__Q3SX28;B7ZNL3;A2AIM4;E9Q454;Q91VH3;F8WID5;P58774-2;P58774;P58771-2;P58771	2;2;2;2;2;2;2;2;2;2;2;1;1;1;1;1;1;1;1;1;1;1;1;1;1;1;1;1;1;1;1;1;1;1;1;1;1;1;1;1	2;2;2;2;2;2;2;2;2;2;2;1;1;1;1;1;1;1;1;1;1;1;1;1;1;1;1;1;1;1;1;1;1;1;1;1;1;1;1;1	2;2;2;2;2;2;2;2;2;2;2;1;1;1;1;1;1;1;1;1;1;1;1;1;1;1;1;1;1;1;1;1;1;1;1;1;1;1;1;1	Tropomyosin alpha-3 chain;Tropomyosin beta chain;Tropomyosin alpha-1 chain	Tpm3;Tpm3-rs7;Tpm2;Tpm1	;;;;;;;;;;;;;;;;;;;;;;;;;;;;;;;;;;;;;;;	40	2	2	2	1	0	1	0	0	0	2	0	0	1	0	1	0	0	0	2	0	0	1	0	1	0	0	0	2	0	0	7.7	7.7	7.7	28.723	247	247;248;248;248;248;248;284;284;285;248;285;71;106;157;245;245;248;248;248;251;281;284;284;284;284;284;284;284;284;284;284;284;284;287;308;326;284;284;284;284	0	4.7182	By matching		By MS/MS
G3UXR9;G8JL47;B1AUR6-2;B1AUR6	G3UXR9;G8JL47;B1AUR6-2;B1AUR6	1;1;1;1	1;1;1;1	1;1;1;1	Protein MMS22-like	Mms22l	;;;	4	1	1	1	1	0	1	0	0	0	0	0	0	1	0	1	0	0	0	0	0	0	1	0	1	0	0	0	0	0	0	2	2	2	83.803	734	734;1198;963;1238	1	-2	By matching		By MS/MS
F7A6H4;E9Q555	F7A6H4;E9Q555	2;2	2;2	2;2	E3 ubiquitin-protein ligase RNF213	Rnf213	;	2	2	2	2	1	0	1	0	0	0	2	1	1	1	0	1	0	0	0	2	1	1	1	0	1	0	0	0	2	1	1	0.6	0.6	0.6	584.78	5152	5152;5152	1	-2	By MS/MS		By MS/MS
F6UFG6;D3YYE1;D3Z7M9;Q64G17;O35381	F6UFG6;D3YYE1;D3Z7M9;Q64G17;O35381	3;3;3;3;3	3;3;3;3;3	3;3;3;3;3	Putative acidic leucine-rich nuclear phosphoprotein 32 family member C;Acidic leucine-rich nuclear phosphoprotein 32 family member A	Anp32a;Anp32c	;;;;	5	3	3	3	1	0	3	0	0	0	3	1	1	1	0	3	0	0	0	3	1	1	1	0	3	0	0	0	3	1	1	15.2	15.2	15.2	15.306	138	138;198;233;123;247	0	2.5859	By MS/MS		By MS/MS
Q8C4K6;Q32ME9;Q2VPA9;P55849-2;P55849	Q8C4K6;Q32ME9;Q2VPA9;P55849-2;P55849	1;1;1;1;1	1;1;1;1;1	1;1;1;1;1	Desmocollin-1	Dsc1	;;;;	5	1	1	1	1	0	1	0	0	0	1	1	0	1	0	1	0	0	0	1	1	0	1	0	1	0	0	0	1	1	0	0.8	0.8	0.8	92.741	832	832;832;863;839;886	0.0062762	1.2736	By MS/MS		By MS/MS
D3YUM9;D3YZ69;Q3UHD3-4;Q3UHD3-3;Q3UHD3	D3YUM9;D3YZ69;Q3UHD3-4;Q3UHD3-3;Q3UHD3	1;1;1;1;1	1;1;1;1;1	1;1;1;1;1	Microtubule-associated tumor suppressor candidate 2 homolog	Mtus2	;;;;	5	1	1	1	1	0	0	0	0	0	0	0	1	1	0	0	0	0	0	0	0	1	1	0	0	0	0	0	0	0	1	11.8	11.8	11.8	19.725	170	170;315;152;348;1353	1	-2	By MS/MS
Q69ZV6;Q810B7-2;Q810B7	Q69ZV6;Q810B7-2;Q810B7	1;1;1	1;1;1	1;1;1	SLIT and NTRK-like protein 5	Slitrk5	;;	3	1	1	1	1	0	0	0	0	0	0	0	1	1	0	0	0	0	0	0	0	1	1	0	0	0	0	0	0	0	1	1.2	1.2	1.2	94.011	839	839;755;957	1	-2	By MS/MS
Q8CFJ0;E9Q6P8	Q8CFJ0;E9Q6P8	1;1	1;1	1;1		Rsrc1	;	2	1	1	1	1	0	0	0	0	0	0	1	0	1	0	0	0	0	0	0	1	0	1	0	0	0	0	0	0	1	0	3.2	3.2	3.2	33.088	281	281;281	1	-2	By MS/MS
Q14BG3;Q8CEQ0	Q14BG3;Q8CEQ0	1;1	1;1	1;1	Cyclin-dependent kinase-like 1	Cdkl1	;	2	1	1	1	1	0	0	0	0	0	0	0	0	1	0	0	0	0	0	0	0	0	1	0	0	0	0	0	0	0	0	3.7	3.7	3.7	41.023	352	352;352	1	-2	By MS/MS
Q6IMF0;E9Q1Y9;B2RTB6;P97861;Q61726;Q9ERE2	Q6IMF0;E9Q1Y9;B2RTB6;P97861;Q61726;Q9ERE2	15;13;13;12;12;11;11	2;2;2;1;1;2;1	1;1;1;0;0;1;0	Keratin, type II cuticular Hb3;Keratin, type II cuticular Hb6;Keratin, type II cuticular Hb1	Krt83;5430421N21Rik;Krt86;Krt81	;;;;;;	7	15	2	1	2	10	11	1	2	2	3	8	4	0	0	2	0	1	1	0	0	0	0	0	1	0	1	1	0	0	0	28.9	3.6	1.8	54.628	495	495;479;479;486;486;495;481	0	5.4392	By matching	By matching	By MS/MS
Q54AH9;Q549D9;A8DV59;A8DV41;P02089;Q9QUN8;D0U293	Q54AH9;Q549D9;A8DV59;A8DV41;P02089;Q9QUN8;D0U293	7;7;7;7;7;6;6	3;3;3;3;3;2;2	3;3;3;3;3;2;2	Hemoglobin subunit beta-2	Hbb-b2;Hbbt2	;;;;;;	7	7	3	3	2	2	7	2	3	2	5	2	2	0	0	3	0	0	0	1	0	0	0	0	3	0	0	0	1	0	0	58.9	28.8	28.8	15.747	146	146;147;147;147;147;146;147	0	2.4712	By matching	By matching	By MS/MS
Q9JJ20;O70456	Q9JJ20;O70456	3;3	1;1	1;1	14-3-3 protein sigma	Sfn	;	2	3	1	1	2	1	3	1	1	1	3	2	2	0	0	1	0	0	0	1	1	1	0	0	1	0	0	0	1	1	1	10.5	3.2	3.2	27.833	248	248;248	0.008	1.1659	By matching	By matching	By MS/MS
Q9CY10;Q91VB8;Q8BPF4;A8DUV3;P01942;Q9QWJ3;Q9CY06;Q9CWS5;Q61287;A8DUV1;Q61649;Q78PA4;A7M7S6;P06467	Q9CY10;Q91VB8;Q8BPF4;A8DUV3;P01942;Q9QWJ3;Q9CY06;Q9CWS5;Q61287;A8DUV1;Q61649	6;6;6;6;6;5;5;5;5;5;3;1;1;1	4;4;4;4;4;3;3;3;3;3;3;0;0;0	4;4;4;4;4;3;3;3;3;3;3;0;0;0	Hemoglobin subunit alpha	haemaglobin alpha 2;Hbat1;Hba	;;;;;;;;;;	14	6	4	4	2	3	5	2	2	2	3	1	2	1	1	4	0	0	1	2	0	1	1	1	4	0	0	1	2	0	1	43	36.6	36.6	15.202	142	142;142;142;142;142;122;142;142;142;142;58;142;156;142	0	10.476	By MS/MS	By matching	By MS/MS
A6BLY7	A6BLY7	3	1	1	Keratin, type I cytoskeletal 28	Krt28		1	3	1	1	2	2	3	2	2	2	3	2	2	1	1	1	1	1	1	1	1	1	1	1	1	1	1	1	1	1	1	5	1.9	1.9	50.346	462	462	0.0045662	1.8039	By MS/MS	By MS/MS	By MS/MS
Q546G4;P07724;K7R066	Q546G4;P07724;K7R066	4;4;2	2;2;1	2;2;1	Serum albumin	Alb	;;	3	4	2	2	2	2	2	2	2	2	2	1	3	1	1	0	1	1	1	1	0	2	1	1	0	1	1	1	1	0	2	7.4	3.6	3.6	68.692	608	608;608;171	0	2.4905	By matching	By matching	By matching
D3Z6P0-2;D3Z6P0;F6S5U2;F6Q519	D3Z6P0-2;D3Z6P0;F6S5U2	11;11;6;3	11;11;6;3	11;11;6;3	Protein disulfide-isomerase A2	Pdia2	;;	4	11	11	11	2	1	11	0	0	1	10	4	6	2	1	11	0	0	1	10	4	6	2	1	11	0	0	1	10	4	6	24	24	24	57.959	524	524;527;225;154	0	19.772	By MS/MS	By matching	By MS/MS
Q3TPE1;Q3TD35;Q3U017;Q2I0J8;Q2I0J7;E9QPU1;Q8CIZ8-2;Q8CIZ8	Q3TPE1;Q3TD35;Q3U017;Q2I0J8;Q2I0J7;E9QPU1;Q8CIZ8-2;Q8CIZ8	2;2;2;2;2;2;2;2	2;2;2;2;2;2;2;2	2;2;2;2;2;2;2;2	von Willebrand factor;von Willebrand antigen 2	Vwf	;;;;;;;	8	2	2	2	2	1	0	1	1	1	0	2	1	2	1	0	1	1	1	0	2	1	2	1	0	1	1	1	0	2	1	10.4	10.4	10.4	44.796	405	405;420;1126;2813;2813;2813;402;2813	0	3.7363	By MS/MS	By matching
P12960	P12960	3	3	3	Contactin-1	Cntn1		1	3	3	3	2	2	0	1	2	1	1	1	1	2	2	0	1	2	1	1	1	1	2	2	0	1	2	1	1	1	1	4.2	4.2	4.2	113.39	1020	1020	0	6.0493	By matching	By MS/MS
P68510	P68510	3	1	1	14-3-3 protein eta	Ywhah		1	3	1	1	2	1	2	1	2	2	2	1	1	0	0	0	0	1	1	0	0	0	0	0	0	0	1	1	0	0	0	13.4	6.1	6.1	28.211	246	246	0	2.1308	By matching	By matching	By matching
Q5NC82;E9PZF0;Q01768;B0LAA8;Q8R4B4;Q5NC80;Q5NC79	Q5NC82;E9PZF0;Q01768;B0LAA8;Q8R4B4	9;9;9;8;6;4;2	9;9;9;8;6;4;2	5;5;5;4;2;0;0	Nucleoside diphosphate kinase;Nucleoside diphosphate kinase B	Nme2;Gm20390	;;;;	7	9	9	5	2	2	5	1	6	5	6	2	2	2	2	5	1	6	5	6	2	2	1	1	1	0	3	2	2	0	0	74.3	74.3	44.1	17.363	152	152;267;152;144;365;127;117	0	35.129	By matching	By matching	By MS/MS
Q3THH1;Q922R8;Q3TML0;Q3TJL8;Q9DAB4	Q3THH1;Q922R8;Q3TML0;Q3TJL8;Q9DAB4	7;7;6;6;5	7;7;6;6;5	7;7;6;6;5	Protein disulfide-isomerase A6	Pdia6	;;;;	5	7	7	7	2	1	6	1	6	6	6	2	3	2	1	6	1	6	6	6	2	3	2	1	6	1	6	6	6	2	3	22.2	22.2	22.2	48.657	445	445;440;445;445;391	0	58.138	By MS/MS	By matching	By MS/MS
Q5EBQ2;Q3TGC5;P70296;D3Z1V4;D6RHS6	Q5EBQ2;Q3TGC5;P70296;D3Z1V4;D6RHS6	6;6;6;5;3	6;6;6;5;3	6;6;6;5;3	Phosphatidylethanolamine-binding protein 1;Hippocampal cholinergic neurostimulating peptide	Pebp1	;;;;	5	6	6	6	2	0	4	1	5	5	5	1	1	2	0	4	1	5	5	5	1	1	2	0	4	1	5	5	5	1	1	57.8	57.8	57.8	20.83	187	187;187;187;209;136	0	34.229	By MS/MS		By MS/MS
Q99LL6;P11087-2;P11087;Q60785	Q99LL6;P11087-2;P11087;Q60785	6;6;6;4;1	6;6;6;4;1	6;6;6;4;1	Collagen alpha-1(I) chain	Col1a1	;;;	5	6	6	6	2	2	1	3	4	4	4	4	4	2	2	1	3	4	4	4	4	4	2	2	1	3	4	4	4	4	4	11.2	11.2	11.2	58.804	589	589;1225;1453;325;114	0	61.299	By MS/MS	By MS/MS	By matching
Q04857;B0LAD9;Q99LW4;Q8C6Y0	Q04857;B0LAD9;Q99LW4	3;2;2;1	3;2;2;1	3;2;2;1	Collagen alpha-1(VI) chain	Col6a1	;;	4	3	3	3	2	1	1	1	2	2	1	2	2	2	1	1	1	2	2	1	2	2	2	1	1	1	2	2	1	2	2	3.5	3.5	3.5	108.49	1025	1025;165;406;266	0	9.6509	By MS/MS	By MS/MS	By matching
A0JLV3;B2RVD5;B2RTK3;Q8CBB6;Q921L4;Q8CGP2;Q8CGP1;Q6ZWY9;Q64525;Q64478;Q64475;P10854;P10853;Q8CGP2-2;A0JNS9;Q9D2U9;Q8CGP0;Q64524;P70696;Q8VEE3;G3X9D5	A0JLV3;B2RVD5;B2RTK3;Q8CBB6;Q921L4;Q8CGP2;Q8CGP1;Q6ZWY9;Q64525;Q64478;Q64475;P10854;P10853;Q8CGP2-2;A0JNS9;Q9D2U9;Q8CGP0;Q64524;P70696;Q8VEE3;G3X9D5	4;4;4;4;4;4;4;4;4;4;4;4;4;4;3;3;3;3;3;2;2	4;4;4;4;4;4;4;4;4;4;4;4;4;4;3;3;3;3;3;2;2	4;4;4;4;4;4;4;4;4;4;4;4;4;4;3;3;3;3;3;2;2	Histone H2B;Histone H2B type 1-P;Histone H2B type 1-K;Histone H2B type 1-C/E/G;Histone H2B type 2-B;Histone H2B type 1-H;Histone H2B type 1-B;Histone H2B type 1-M;Histone H2B type 1-F/J/L;Histone H2B type 3-A;Histone H2B type 3-B;Histone H2B type 2-E;Histone H2B type 1-A	Hist1h2bj;Hist1h2bk;Hist1h2bm;Hist1h2br;LOC665622;Hist1h2bp;Hist1h2bc;Hist2h2bb;Hist1h2bh;Hist1h2bb;Hist1h2bf;Hist1h2ba;Hist3h2ba;Hist3h2bb;Hist2h2be	;;;;;;;;;;;;;;;;;;;;	21	4	4	4	2	2	3	2	4	3	3	3	2	2	2	3	2	4	3	3	3	2	2	2	3	2	4	3	3	3	2	34.1	34.1	34.1	13.579	123	123;126;126;134;135;126;126;126;126;126;126;126;126;138;127;126;126;126;127;120;120	0	10.048	By MS/MS	By matching	By MS/MS
F8WIX8;A0A0N4SV66;A0AUV1;A3KPD0;Q8CGP4;Q149V4;B2RWH3;B2RVF0;A2AB79;Q8CGP6;Q8R1M2;Q64523;Q8CGP7;Q8CGP5;Q8BFU2;Q6GSS7;P22752;B2RVP5;Q3THW5;P0C0S6;P27661;Q61668;G3UWL7;Q8R029;Q3TFU6;Q3UA95;Q64522	F8WIX8;A0A0N4SV66;A0AUV1;A3KPD0;Q8CGP4;Q149V4;B2RWH3;B2RVF0;A2AB79;Q8CGP6;Q8R1M2;Q64523;Q8CGP7;Q8CGP5;Q8BFU2;Q6GSS7;P22752;B2RVP5;Q3THW5;P0C0S6;P27661	3;3;3;3;3;3;3;3;3;3;3;3;3;3;3;3;3;2;2;2;2;1;1;1;1;1;1	3;3;3;3;3;3;3;3;3;3;3;3;3;3;3;3;3;2;2;2;2;1;1;1;1;1;1	3;3;3;3;3;3;3;3;3;3;3;3;3;3;3;3;3;2;2;2;2;1;1;1;1;1;1	Histone H2A;Histone H2A type 1-H;Histone H2A.J;Histone H2A type 2-C;Histone H2A type 1-K;Histone H2A type 1-F;Histone H2A type 3;Histone H2A type 2-A;Histone H2A type 1;Histone H2A.V;Histone H2A.Z;Histone H2AX	Hist1h2al;Hist1h2ah;Hist1h2aa;Hist2h2ac;Hist2h2aa1;Hist1h2ad;Hist3h2a;H2afj;Hist1h2ak;Hist1h2af;Hist1h2ab;H2afv;H2afz;H2afx	;;;;;;;;;;;;;;;;;;;;	27	3	3	3	2	1	3	1	2	1	2	1	1	2	1	3	1	2	1	2	1	1	2	1	3	1	2	1	2	1	1	28	28	28	13.607	125	125;126;127;128;129;129;130;130;130;128;129;129;130;130;130;130;130;128;128;128;143;37;87;90;90;105;130	0	6.2244	By MS/MS	By matching	By MS/MS
P68372;Q9D6F9;Q9CVR0;Q9DCR1;Q9CRT0;Q3U9U3;Q3UMM1;Q922F4;Q9CUN8	P68372;Q9D6F9;Q9CVR0;Q9DCR1	13;10;9;8;6;6;6;6;5	13;10;9;8;6;6;6;6;5	3;2;2;0;0;0;0;0;0	Tubulin beta-4B chain;Tubulin beta-4A chain	Tubb4b;Tubb4a	;;;	9	13	13	3	2	4	6	2	9	9	8	3	4	2	4	6	2	9	9	8	3	4	1	0	2	0	1	2	2	1	1	45.6	45.6	12.1	49.83	445	445;444;291;299;235;375;447;447;211	0	107.26	By MS/MS	By MS/MS	By MS/MS
S4R257;D2KHZ9;A0A0A0MQF6;P16858;S4R1W1;Q3TUZ9;D3YYI5;W8QM43;Q6IWE3;Q4VBD1;Q8CEV2;Q3V2I5;A0A0R4J0X7;S4R2G5;Q64467;S4R1W8;V9GXA7;V9GXK0;V9GX06;Q8BJ40	S4R257;D2KHZ9;A0A0A0MQF6;P16858;S4R1W1;Q3TUZ9;D3YYI5	11;11;11;11;10;6;6;2;2;2;2;2;2;2;2;1;1;1;1;1	11;11;11;11;10;6;6;2;2;2;2;2;2;2;2;1;1;1;1;1	11;11;11;11;10;6;6;2;2;2;2;2;2;2;2;1;1;1;1;1	Glyceraldehyde-3-phosphate dehydrogenase	Gapdh;GAPDH;Gm3839;Gm10481;Gm7293	;;;;;;	20	11	11	11	2	3	6	4	5	7	8	4	4	2	3	6	4	5	7	8	4	4	2	3	6	4	5	7	8	4	4	58.2	58.2	58.2	29.939	280	280;333;359;333;333;144;336;77;96;136;156;236;438;440;440;55;121;151;183;209	0	62.219	By MS/MS	By MS/MS	By MS/MS
P17751;H7BXC3	P17751;H7BXC3	9;8	9;8	9;8	Triosephosphate isomerase	Tpi1	;	2	9	9	9	2	3	7	2	5	4	7	2	4	2	3	7	2	5	4	7	2	4	2	3	7	2	5	4	7	2	4	36.8	36.8	36.8	32.191	299	299;167	0	26.035	By MS/MS	By MS/MS	By MS/MS
F6W4D3;D3YY36;Q8VC96;Q9DBD0	F6W4D3;D3YY36;Q8VC96;Q9DBD0	2;2;2;2	1;1;1;1	1;1;1;1	Inhibitor of carbonic anhydrase	1300017J02Rik;Ica	;;;	4	2	1	1	2	2	1	1	2	2	1	2	1	1	1	1	1	1	1	1	1	1	1	1	1	1	1	1	1	1	1	9.9	5.4	5.4	26.65	242	242;622;700;700	0	13.41	By MS/MS	By MS/MS	By MS/MS
Q3U7Z6;Q9DBJ1;Q6NWV5;Q5NCI4;O70250	Q3U7Z6;Q9DBJ1;Q6NWV5	7;7;6;3;3	7;7;6;3;3	7;7;6;3;3	Phosphoglycerate mutase 1	Pgam1	;;	5	7	7	7	2	3	2	2	4	4	4	1	0	2	3	2	2	4	4	4	1	0	2	3	2	2	4	4	4	1	0	39.4	39.4	39.4	28.832	254	254;254;197;253;253	0	19.604	By MS/MS	By MS/MS	By MS/MS
Q5M9K1;P07309;Q9D6A4	Q5M9K1;P07309;Q9D6A4	4;4;3	4;4;3	4;4;3	Transthyretin	Ttr	;;	3	4	4	4	2	0	3	1	2	3	3	1	2	2	0	3	1	2	3	3	1	2	2	0	3	1	2	3	3	1	2	39.5	39.5	39.5	15.776	147	147;147;147	0	68.216	By MS/MS		By MS/MS
Q32MU0;P63239;Q8BRQ2	Q32MU0;P63239	8;8;3	8;8;3	8;8;3	Neuroendocrine convertase 1	Pcsk1	;	3	8	8	8	2	0	3	3	7	2	2	0	0	2	0	3	3	7	2	2	0	0	2	0	3	3	7	2	2	0	0	16.1	16.1	16.1	84.173	753	753;753;247	0	28.811	By MS/MS		By MS/MS
Q64727;Q3TEB0	Q64727	16;1	16;1	16;1	Vinculin	Vcl		2	16	16	16	2	9	0	9	5	4	2	4	2	2	9	0	9	5	4	2	4	2	2	9	0	9	5	4	2	4	2	23.7	23.7	23.7	116.72	1066	1066;379	0	100.86	By matching	By MS/MS
E9Q1Y3;E9Q414	E9Q1Y3;E9Q414	5;5	3;3	3;3	Apolipoprotein B-100;Apolipoprotein B-48	Apob	;	2	5	3	3	2	5	0	4	5	5	2	2	2	1	3	0	2	3	3	2	1	1	1	3	0	2	3	3	2	1	1	1.1	0.7	0.7	503.9	4456	4456;4505	0	10.668	By MS/MS	By MS/MS
Q04447	Q04447	10	10	10	Creatine kinase B-type	Ckb		1	10	10	10	2	0	4	0	6	7	7	0	1	2	0	4	0	6	7	7	0	1	2	0	4	0	6	7	7	0	1	43.6	43.6	43.6	42.713	381	381	0	51.851	By matching		By matching
Q9QXV0	Q9QXV0	6	6	6	ProSAAS;KEP;Big SAAS;Little SAAS;Big PEN-LEN;PEN;PEN-20;PEN-19;Little LEN;Big LEN	Pcsk1n		1	6	6	6	2	0	5	0	3	2	3	1	1	2	0	5	0	3	2	3	1	1	2	0	5	0	3	2	3	1	1	33.3	33.3	33.3	27.27	258	258	0	12.568	By MS/MS		By MS/MS
Q3UZU8;Q3TY66;P16014;Q8BP91;Q3UZP2;Q9CTW1	Q3UZU8;Q3TY66;P16014;Q8BP91;Q3UZP2	5;5;5;4;3;2	5;5;5;4;3;2	5;5;5;4;3;2	Secretogranin-1;CCB peptide;PE-11	Chgb	;;;;	6	5	5	5	2	0	4	0	3	3	2	0	0	2	0	4	0	3	3	2	0	0	2	0	4	0	3	3	2	0	0	10.8	10.8	10.8	77.779	676	676;677;677;677;430;206	0	35.362	By MS/MS		By MS/MS
A0A087WNN3;Q6ZPR6-2;Q6ZPR6	A0A087WNN3;Q6ZPR6-2;Q6ZPR6	2;2;2	2;2;2	2;2;2	Inhibitor of Bruton tyrosine kinase	Ibtk	;;	3	2	2	2	2	1	1	0	0	1	1	1	1	2	1	1	0	0	1	1	1	1	2	1	1	0	0	1	1	1	1	3.4	3.4	3.4	54.675	495	495;1251;1352	1	-2	By MS/MS	By MS/MS	By matching
Q8BKE0;Q9CZ58;Q3UWT6;P49722	Q8BKE0;Q9CZ58;Q3UWT6;P49722	2;2;2;2	2;2;2;2	2;2;2;2	Proteasome subunit alpha type;Proteasome subunit alpha type-2	Psma2	;;;	4	2	2	2	2	0	1	0	2	0	1	1	1	2	0	1	0	2	0	1	1	1	2	0	1	0	2	0	1	1	1	16.4	16.4	16.4	20.786	183	183;234;247;234	0	3.8612	By MS/MS		By MS/MS
Q8K2T2;Q8C6G3;W0UVC3;P00683	Q8K2T2;Q8C6G3;W0UVC3;P00683	2;2;2;2	2;2;2;2	2;2;2;2	Ribonuclease pancreatic	Rnase1;Rac1	;;;	4	2	2	2	2	1	2	1	0	0	1	0	0	2	1	2	1	0	0	1	0	0	2	1	2	1	0	0	1	0	0	18.1	18.1	18.1	16.804	149	149;149;191;149	0.0023041	1.8767	By MS/MS	By MS/MS	By MS/MS
Q8C6F9;Q3TV26;P43137	Q8C6F9;Q3TV26;P43137	5;5;5	5;5;5	5;5;5	Lithostathine-1	Reg1	;;	3	5	5	5	2	1	5	0	0	0	5	1	3	2	1	5	0	0	0	5	1	3	2	1	5	0	0	0	5	1	3	45.2	45.2	45.2	14.34	126	126;165;165	0	32.842	By MS/MS	By MS/MS	By MS/MS
Q542G9;P07356;Q3UCD3;Q9CZI7;B0V2N7;B0V2N8;Q99KH3;B0V2N5	Q542G9;P07356;Q3UCD3;Q9CZI7;B0V2N7;B0V2N8;Q99KH3;B0V2N5	11;11;10;10;8;7;7;6	11;11;10;10;8;7;7;6	11;11;10;10;8;7;7;6	Annexin;Annexin A2	Anxa2	;;;;;;;	8	11	11	11	2	0	10	0	0	0	10	1	1	2	0	10	0	0	0	10	1	1	2	0	10	0	0	0	10	1	1	36.6	36.6	36.6	38.676	339	339;339;339;339;196;176;222;272	0	40.911	By MS/MS		By MS/MS
A8DUK0;P02088;A8DUL5;A8DUP5;A8DUP7;A8DUM2;A8DUP3;A8DUK2;B1Q450;A8DUK7;A8DUK4;E9Q223;A8DUP0;A8DUL2;A8DUL0;A8DUQ5;Q61650;A8DUL7;Q61348	A8DUK0;P02088;A8DUL5;A8DUP5;A8DUP7;A8DUM2;A8DUP3;A8DUK2;B1Q450;A8DUK7;A8DUK4;E9Q223;A8DUP0;A8DUL2;A8DUL0;A8DUQ5	8;8;7;7;7;7;6;6;5;5;5;4;4;4;4;4;3;3;2	6;6;5;5;5;5;5;4;3;3;3;3;3;2;2;2;2;1;2	2;2;1;2;2;2;2;0;1;0;0;0;0;0;0;0;2;0;2	Hemoglobin subunit beta-1	Hbbt1;Hbb-b1;HBB1;Hbb-bs	;;;;;;;;;;;;;;;	19	8	6	2	3	2	7	2	5	2	7	3	3	1	0	5	0	3	0	5	1	1	0	0	2	0	1	0	1	0	0	68.7	55.8	15	15.84	147	147;147;147;147;147;147;147;151;147;147;147;103;147;147;147;147;52;147;31	0	15.082	By matching	By matching	By MS/MS
Q9D7Y7;Q9CPN9	Q9D7Y7;Q9CPN9	5;5;1;1;1;1;1;1;1	5;5;1;1;1;1;1;1;1	5;5;1;1;1;1;1;1;1		2210010C04Rik	;	9	5	5	5	3	3	4	0	1	2	4	3	3	3	3	4	0	1	2	4	3	3	3	3	4	0	1	2	4	3	3	34.4	34.4	34.4	26.407	247	247;247;1473;1489;1506;1544;1549;1561;1577	0	19.455	By MS/MS	By MS/MS	By MS/MS
A8IP69;P61982	A8IP69;P61982	4;4	2;2	2;2	14-3-3 protein gamma;14-3-3 protein gamma, N-terminally processed	Ywhag	;	2	4	2	2	3	1	2	1	1	3	3	1	1	1	0	0	0	0	2	1	0	0	1	0	0	0	0	2	1	0	0	20.6	13.4	13.4	28.302	247	247;247	0	17.536	By MS/MS	By matching	By matching
P05208	P05208	7	7	7	Chymotrypsin-like elastase family member 2A	Cela2a		1	7	7	7	3	5	5	1	2	1	3	4	3	3	5	5	1	2	1	3	4	3	3	5	5	1	2	1	3	4	3	47.2	47.2	47.2	28.913	271	271	0	52.905	By MS/MS	By MS/MS	By MS/MS
A2A5N2;Q9CQV8-2;Q9CQV8;A2A5N1	A2A5N2;Q9CQV8-2;Q9CQV8;A2A5N1	4;4;4;2	1;1;1;1	1;1;1;1	14-3-3 protein beta/alpha;14-3-3 protein beta/alpha, N-terminally processed	Ywhab	;;;	4	4	1	1	3	2	3	1	3	3	3	2	2	0	0	0	0	1	1	0	0	0	0	0	0	0	1	1	0	0	0	16.7	5.7	5.7	28.086	246	246;244;246;159	0	23.258	By matching	By matching	By matching
A3KML3;F6YY69;F6VW30;P68254-2;P68254	A3KML3;F6YY69;F6VW30;P68254-2;P68254	7;7;7;7;7	4;4;4;4;4	4;4;4;4;4	14-3-3 protein theta	Ywhaq	;;;;	5	7	4	4	3	3	3	1	3	5	6	2	2	0	1	0	0	1	3	3	0	0	0	1	0	0	1	3	3	0	0	36.3	25.3	25.3	27.778	245	245;285;303;243;245	0	55.688	By matching	By matching	By matching
P09411;S4R2M7;P09041	P09411	11;5;2	11;5;2	11;5;2	Phosphoglycerate kinase 1	Pgk1		3	11	11	11	3	1	6	1	3	4	10	1	1	3	1	6	1	3	4	10	1	1	3	1	6	1	3	4	10	1	1	31.7	31.7	31.7	44.55	417	417;255;417	0	15.477	By matching	By matching	By MS/MS
Q53ZU7;O08709;Q6GT24;D3Z0Y2;Q6A0D0;Q8BPD3;Q8BG37;A0A0A6YXQ7	Q53ZU7;O08709;Q6GT24;D3Z0Y2;Q6A0D0;Q8BPD3	8;8;7;6;6;5;2;1	8;8;7;6;6;5;2;1	8;8;7;6;6;5;2;1	Peroxiredoxin-6	Prdx6	;;;;;	8	8	8	8	3	1	4	1	4	3	4	2	2	3	1	4	1	4	3	4	2	2	3	1	4	1	4	3	4	2	2	47.3	47.3	47.3	24.87	224	224;224;224;200;227;178;224;76	0	37.972	By matching	By matching	By MS/MS
Q8C153;Q3UZ14;Q3UMI7;Q3UDC8;Q3TX47;Q3TWX1;Q3TLB1;Q3TJZ1;P58252;Q6P9L9;Q8BMA8;Q3TW58;Q3UBL9;Q3TK17;Q3TSK4;Q3TPG2;Q99LT6;Q61509;O89070;O89069	Q8C153;Q3UZ14;Q3UMI7;Q3UDC8;Q3TX47;Q3TWX1;Q3TLB1;Q3TJZ1;P58252;Q6P9L9;Q8BMA8;Q3TW58;Q3UBL9;Q3TK17;Q3TSK4;Q3TPG2;Q99LT6	17;17;17;17;17;17;17;17;17;16;16;16;16;16;12;11;9;8;1;1	17;17;17;17;17;17;17;17;17;16;16;16;16;16;12;11;9;8;1;1	17;17;17;17;17;17;17;17;17;16;16;16;16;16;12;11;9;8;1;1	Elongation factor 2	Eef2	;;;;;;;;;;;;;;;;	20	17	17	17	3	2	5	1	8	11	10	2	1	3	2	5	1	8	11	10	2	1	3	2	5	1	8	11	10	2	1	26	26	26	95.257	858	858;858;858;858;858;858;858;858;858;843;858;858;858;858;418;367;287;268;109;259	0	33.316	By MS/MS	By matching	By MS/MS
Q80Y52;Q3UIF3;Q3TKA2;P07901;Q3TJU7;A0PJ91;Q3TKB9;Q8C5U3;Q3TKG0;Q8C2A9;B7ZC50;A2A6A2;B7ZC49	Q80Y52;Q3UIF3;Q3TKA2;P07901;Q3TJU7;A0PJ91;Q3TKB9;Q8C5U3;Q3TKG0	14;14;14;14;12;12;11;11;11;4;3;1;1	9;9;9;9;9;7;7;7;7;1;0;0;0	9;9;9;9;9;7;7;7;7;1;0;0;0	Heat shock protein HSP 90-alpha	Hsp90aa1	;;;;;;;;	13	14	9	9	3	5	7	4	8	8	9	1	2	1	3	3	2	5	5	5	0	0	1	3	3	2	5	5	5	0	0	23.1	15.3	15.3	84.787	733	733;733;733;733;556;565;556;557;557;274;201;98;103	0	70.79	By matching	By MS/MS	By matching
Q545I7;P01325	Q545I7;P01325	5;5	4;4	4;4	Insulin-1;Insulin-1 B chain;Insulin-1 A chain	Ins1	;	2	5	4	4	3	1	2	2	4	3	3	2	2	2	1	1	2	4	2	2	1	1	2	1	1	2	4	2	2	1	1	70.4	50.9	50.9	12.16	108	108;108	0	41.497	By MS/MS	By matching	By MS/MS
Q3TT51;P12961	Q3TT51;P12961	4;4	4;4	4;4	Neuroendocrine protein 7B2;N-terminal peptide;C-terminal peptide	Scg5	;	2	4	4	4	3	1	4	1	3	3	3	2	1	3	1	4	1	3	3	3	2	1	3	1	4	1	3	3	3	2	1	30.7	30.7	30.7	23.866	212	212;212	0	46.933	By MS/MS	By matching	By MS/MS
Q5FW97;P17182;Q6PHC1;Q8CF78;B0QZL1;B1ARR7	Q5FW97;P17182;Q6PHC1;Q8CF78;B0QZL1	15;15;11;9;8;6	15;15;11;9;8;6	13;13;11;7;6;4	Alpha-enolase;Enolase	EG433182;Eno1	;;;;	6	15	15	13	3	3	8	4	9	9	9	5	2	3	3	8	4	9	9	9	5	2	2	2	6	3	8	8	7	4	2	48.2	48.2	41	47.14	434	434;434;366;321;221;119	0	49.776	By MS/MS	By matching	By MS/MS
Q58E64;Q3UA81;P10126;Q3TII3;Q3UZQ3;D3YZ68;P62631;D3Z3I8;Q4FZE5	Q58E64;Q3UA81;P10126;Q3TII3;Q3UZQ3	11;11;11;10;10;5;5;4;3	11;11;11;10;10;5;5;4;3	11;11;11;10;10;5;5;4;3	Elongation factor 1-alpha;Elongation factor 1-alpha 1	Eef1a1	;;;;	9	11	11	11	3	4	7	3	5	8	8	3	3	3	4	7	3	5	8	8	3	3	3	4	7	3	5	8	8	3	3	31.4	31.4	31.4	50.113	462	462;462;462;462;462;249;463;186;108	0	91.696	By MS/MS	By MS/MS	By MS/MS
D3YW52;Q61838	D3YW52;Q61838	4;4	3;3	3;3	Alpha-2-macroglobulin;Alpha-2-macroglobulin 165 kDa subunit;Alpha-2-macroglobulin 35 kDa subunit	Pzp;A2m	;	2	4	3	3	3	3	3	3	3	3	3	3	3	2	2	2	2	2	2	2	2	2	2	2	2	2	2	2	2	2	2	2.3	1.8	1.8	167.28	1507	1507;1495	0	6.1637	By MS/MS	By MS/MS	By MS/MS
P56480	P56480	10	10	10	ATP synthase subunit beta, mitochondrial	Atp5b		1	10	10	10	3	1	7	0	3	3	9	0	2	3	1	7	0	3	3	9	0	2	3	1	7	0	3	3	9	0	2	27.8	27.8	27.8	56.3	529	529	0	25.124	By matching	By matching	By MS/MS
A5JUZ1;A0A0A6YW67;E9Q9J0;Q66JP1;Q8C2K3;Q642L7;E9Q4P0;E9Q5F6;Q922B0;E9QNP0;Q5SX22;Q3TH47;Q78XY9;Q6NZC5;Q8R0Z9;Q922Z8;Q8VC46;P62984;P62983;P0CG49;P0CG50;B0LAC2;J3QK04;D3YYZ2	A5JUZ1;A0A0A6YW67;E9Q9J0;Q66JP1;Q8C2K3;Q642L7;E9Q4P0;E9Q5F6;Q922B0;E9QNP0;Q5SX22;Q3TH47;Q78XY9;Q6NZC5;Q8R0Z9;Q922Z8;Q8VC46;P62984;P62983;P0CG49;P0CG50;B0LAC2;J3QK04	3;3;3;3;3;3;3;3;3;3;3;3;3;3;3;3;3;3;3;3;3;2;2;1	3;3;3;3;3;3;3;3;3;3;3;3;3;3;3;3;3;3;3;3;3;2;2;1	3;3;3;3;3;3;3;3;3;3;3;3;3;3;3;3;3;3;3;3;3;2;2;1	Ubiquitin-60S ribosomal protein L40;Ubiquitin;60S ribosomal protein L40;Ubiquitin-40S ribosomal protein S27a;Ubiquitin;40S ribosomal protein S27a;Polyubiquitin-B;Ubiquitin;Polyubiquitin-C;Ubiquitin;Ubiquitin-related 1;Ubiquitin-related 2	Ubc;Gm8797;Uba52;Gm1821;Rps27a;Kxd1;Ubb;Gm7808	;;;;;;;;;;;;;;;;;;;;;;	24	3	3	3	3	0	3	0	1	1	3	3	2	3	0	3	0	1	1	3	3	2	3	0	3	0	1	1	3	3	2	44.7	44.7	44.7	8.5647	76	76;77;96;128;153;156;193;201;202;232;236;278;305;305;354;582;658;128;156;305;734;71;128;122	0	12.128	By MS/MS		By MS/MS
Q3TWK8;B2CQD6;Q08879;Q08879-2;Q3TW70	Q3TWK8;B2CQD6;Q08879;Q08879-2	7;7;7;4;2	1;1;1;1;0	1;1;1;1;0	Fibulin-1	Fbln1	;;;	5	7	1	1	4	6	4	6	5	4	3	5	3	0	0	0	0	0	0	0	1	0	0	0	0	0	0	0	0	1	0	11.1	2.4	2.4	78.06	705	705;705;705;685;228	0	48.605	By matching	By matching	By matching
Q792Y6;P07146	Q792Y6;P07146	5;5	3;3	3;3	Anionic trypsin-2	Prss2	;	2	5	3	3	4	2	2	1	1	1	3	5	3	3	1	0	1	0	0	1	3	1	3	1	0	1	0	0	1	3	1	35.8	28.5	28.5	26.203	246	246;246	0	14.287	By MS/MS	By MS/MS	By matching
P97298	P97298	5	1	1	Pigment epithelium-derived factor	Serpinf1		1	5	1	1	4	5	3	5	5	4	2	4	3	0	1	0	1	1	0	0	0	0	0	1	0	1	1	0	0	0	0	15.3	4.3	4.3	46.233	417	417	0	8.0734	By matching	By MS/MS	By matching
Q61782	Q61782	5;5	1;1	1;1			;	2	5	1	1	4	1	5	0	2	1	3	4	3	0	0	1	0	0	0	0	0	0	0	0	1	0	0	0	0	0	0	58.1	10.8	10.8	10.662	93	93;93	1	-2	By matching	By matching	By MS/MS
B9EIU2;V9GZG9;V9GZQ6;V9GZJ5	B9EIU2;V9GZG9;V9GZQ6;V9GZJ5	8;7;7;6	2;1;1;1	1;0;0;0		C4a;Slp	;;;	4	8	2	1	4	7	2	5	7	4	4	4	4	0	2	0	1	2	1	0	0	0	0	1	0	1	1	1	0	0	0	4.2	1.7	0.4	193.73	1735	1735;1716;1735;1735	0.0061475	1.2274	By matching	By MS/MS	By matching
Q8BFZ3	Q8BFZ3	8	1	1	Beta-actin-like protein 2	Actbl2		1	8	1	1	4	7	4	6	5	6	4	4	5	0	0	0	0	0	1	0	1	1	0	0	0	0	0	1	0	1	1	24.5	3.2	3.2	42.004	376	376	1	-2	By matching	By matching	By matching
Q5SX49;Q8CEH8;Q5SX50;P62962;Q3U7V7;J3QMC2	Q5SX49;Q8CEH8;Q5SX50;P62962;Q3U7V7	5;5;5;5;4;2	2;2;2;2;2;1	2;2;2;2;2;1	Profilin;Profilin-1	Pfn1	;;;;	6	5	2	2	4	4	4	3	5	4	4	4	4	1	1	1	0	2	1	1	1	1	1	1	1	0	2	1	1	1	1	72.3	36.6	36.6	11.82	112	112;140;140;140;140;55	0	7.3583	By matching	By matching	By MS/MS
Q3UBA6;Q3TZJ3;Q3TH56;Q3TEK2;P63017;Q504P4;Q3U9L2;Q3TF16;Q3TQ13;Q3UDS0;Q3ULM1;Q3TRH3;Q3TB63;Q3KQJ4;Q3TH04;Q3UXU1;B7U582;P17156;D3Z5E2;D3YW43;Q3UBR0;B2CSK2;A1L347;Q3TU85;Q3TAI8;A1E2B8;P16627;Q61696;P17879;Q9R2A1;Q61698;Q9QWU1;O88687;O88688;Q91ZU5;Q91ZU4	Q3UBA6;Q3TZJ3;Q3TH56;Q3TEK2;P63017;Q504P4;Q3U9L2;Q3TF16;Q3TQ13;Q3UDS0;Q3ULM1;Q3TRH3;Q3TB63;Q3KQJ4;Q3TH04	21;21;21;21;21;20;20;20;20;19;19;19;17;16;14;10;7;7;5;5;5;4;4;4;4;4;4;4;4;2;2;2;1;1;1;1	19;19;19;19;19;18;18;18;18;17;18;18;15;15;13;10;5;5;4;4;5;2;2;3;3;3;2;3;3;1;2;1;0;1;1;1	19;19;19;19;19;18;18;18;18;17;18;18;15;15;13;10;5;5;4;4;5;2;2;3;3;3;2;3;3;1;2;1;0;1;1;1	Heat shock cognate 71 kDa protein	Hspa8	;;;;;;;;;;;;;;	36	21	19	19	4	1	14	2	17	19	15	3	4	2	1	12	2	15	17	13	1	2	2	1	12	2	15	17	13	1	2	45.4	43.7	43.7	70.898	646	646;646;646;646;646;627;646;646;646;553;619;646;459;565;518;396;633;633;116;158;251;641;641;641;641;641;641;641;642;111;228;552;43;143;282;461	0	84.459	By MS/MS	By matching	By MS/MS
B2RTL6;Q9Z1T2;E9PWF0;Q05895	B2RTL6;Q9Z1T2	5;5;1;1	4;4;1;1	4;4;1;1	Thrombospondin-4	Thbs4	;	4	5	4	4	4	3	1	4	5	5	3	4	4	3	2	0	3	4	4	2	3	3	3	2	0	3	4	4	2	3	3	6.3	5.3	5.3	106.37	963	963;963;919;956	0	35.275	By MS/MS	By MS/MS	By matching
Q71LX8;P11499;Q80YC2;Q811H6;E9Q3D6;D3Z1R1;E9PX27;E9Q0C3	Q71LX8;P11499	15;15;5;5;4;3;3;2	13;13;5;5;4;1;1;2	8;8;3;3;3;0;0;2	Heat shock protein HSP 90-beta	Hsp90ab1	;	8	15	13	8	4	3	11	3	9	8	12	1	5	4	3	10	3	7	7	11	1	4	2	1	6	1	4	4	7	0	2	25.8	23.9	16	83.28	724	724;724;363;378;189;76;112;161	0	60.107	By MS/MS	By matching	By MS/MS
Q5SS40;P62259;Q8BPH1;D6REF3;F6WA09;Q3V453	Q5SS40;P62259;Q8BPH1;D6REF3;F6WA09	12;12;10;6;6;3	12;12;10;6;6;3	10;10;8;5;5;2	14-3-3 protein epsilon	Ywhae	;;;;	6	12	12	10	4	4	6	3	6	8	8	3	3	4	4	6	3	6	8	8	3	3	2	3	4	2	5	7	6	2	2	47.1	47.1	40	29.174	255	255;255;255;130;154;91	0	48.764	By MS/MS	By MS/MS	By MS/MS
B2RTM0;P62806;Q61667;Q6B822	B2RTM0;P62806;Q61667	6;6;4;2	6;6;4;2	6;6;4;2	Histone H4	Hist2h4;Hist1h4a	;;	4	6	6	6	4	2	5	0	4	4	5	3	3	4	2	5	0	4	4	5	3	3	4	2	5	0	4	4	5	3	3	57.3	57.3	57.3	11.367	103	103;103;55;43	0	15.108	By MS/MS	By MS/MS	By MS/MS
B2MWM9;P14211;Q3UWP8;Q62041	B2MWM9;P14211;Q3UWP8	12;12;11;1	12;12;11;1	12;12;11;1	Calreticulin	Calr	;;	4	12	12	12	4	0	9	0	9	6	11	3	2	4	0	9	0	9	6	11	3	2	4	0	9	0	9	6	11	3	2	45.9	45.9	45.9	47.994	416	416;416;368;178	0	68.832	By MS/MS		By MS/MS
Q14DR9;Q8R2E9	Q14DR9;Q8R2E9	10;10	10;10	9;9	ERO1-like protein beta	Ero1lb	;	2	10	10	9	4	0	9	0	4	2	7	0	2	4	0	9	0	4	2	7	0	2	4	0	8	0	4	2	6	0	2	25.7	25.7	23.3	53.518	467	467;467	0	25.403	By MS/MS		By MS/MS
Q9R0T7;Q9QUK9;Q3V2E0;G3UXD0;Q7M754;Q792Y9;Q9Z1R9	Q9R0T7;Q9QUK9;Q3V2E0;G3UXD0;Q7M754	8;6;6;4;4;2;2	8;6;6;4;4;2;2	3;3;3;2;1;0;0		Try4;Try5;Gm5409	;;;;	7	8	8	3	5	4	6	1	2	4	5	6	5	5	4	6	1	2	4	5	6	5	2	1	2	1	1	2	1	2	1	57.3	57.3	26.4	26.274	246	246;246;255;135;246;245;246	0	87.283	By MS/MS	By MS/MS	By MS/MS
Q5BKQ4	Q5BKQ4	9	9	9	Inactive pancreatic lipase-related protein 1	Pnliprp1		1	9	9	9	5	2	7	1	1	3	5	6	3	5	2	7	1	1	3	5	6	3	5	2	7	1	1	3	5	6	3	25.8	25.8	25.8	52.695	473	473	0	19.749	By MS/MS	By MS/MS	By MS/MS
Q9CQ52;A2A9U8	Q9CQ52	7;1	6;1	6;1	Chymotrypsin-like elastase family member 3B	Cela3b		2	7	6	6	5	3	5	3	1	1	4	4	4	5	2	5	2	1	1	4	4	4	5	2	5	2	1	1	4	4	4	38.7	36.1	36.1	28.904	269	269;283	0	24.005	By MS/MS	By MS/MS	By MS/MS
P52480-2	P52480-2	17	1	1	Pyruvate kinase PKM	Pkm		1	17	1	1	5	0	11	0	9	11	14	1	1	0	0	0	0	0	1	0	0	0	0	0	0	0	0	1	0	0	0	40.5	1.5	1.5	57.984	531	531	0.00611	1.2106	By matching		By matching
A0A0A0MQA5;P68368;A0A087WRB4;A0A087WQS4;A0A087WSB0;A0A087WSL5;A0A087WS35	A0A0A0MQA5;P68368	16;16;5;5;3;3;1	3;3;2;2;2;2;1	3;3;2;2;2;2;1	Tubulin alpha-4A chain	Tuba4a	;	7	16	3	3	5	5	7	7	6	13	10	5	2	1	2	1	2	2	2	1	2	1	1	2	1	2	2	2	1	2	1	45.7	9.4	9.4	52.793	477	477;448;100;125;81;89;75	0	8.7483	By MS/MS	By MS/MS	By matching
Q5EEX1;P01326;D0EY27;E0CXX7;D3YWU5;D3Z596;D3Z595	Q5EEX1;P01326;D0EY27;E0CXX7	6;6;5;3;2;2;2	6;6;5;3;2;2;2	5;5;5;2;2;2;2	Insulin-2;Insulin-2 B chain;Insulin-2 A chain	Ins2	;;;	7	6	6	5	5	1	4	5	4	5	3	1	1	5	1	4	5	4	5	3	1	1	4	1	3	5	4	4	2	0	0	75.5	75.5	56.4	12.364	110	110;110;109;98;71;79;106	0	248.03	By MS/MS	By MS/MS	By MS/MS
Q5SVY2;Q3UAJ1;Q3TE63;P17742;Q9CZK9;F8VPN3;V9GXC1;V9GX31	Q5SVY2;Q3UAJ1;Q3TE63;P17742;Q9CZK9	9;9;9;9;7;3;2;2	9;9;9;9;7;3;2;2	9;9;9;9;7;3;2;2	Peptidyl-prolyl cis-trans isomerase;Peptidyl-prolyl cis-trans isomerase A;Peptidyl-prolyl cis-trans isomerase A, N-terminally processed	Ppia	;;;;	8	9	9	9	5	5	6	4	8	6	5	4	4	5	5	6	4	8	6	5	4	4	5	5	6	4	8	6	5	4	4	61	61	61	17.971	164	164;164;164;164;167;147;77;77	0	47.499	By MS/MS	By MS/MS	By MS/MS
Q792Z1	Q792Z1	6	2	2		Try10		1	6	2	2	5	3	5	1	2	3	5	4	4	2	1	2	1	2	2	2	1	1	2	1	2	1	2	2	2	1	1	42.3	15.4	15.4	26.221	246	246	0	10.054	By MS/MS	By MS/MS	By MS/MS
P55095;A2AS86	P55095;A2AS86	7;6	7;6	7;6	Glucagon;Glicentin;Glicentin-related polypeptide;Oxyntomodulin;Glucagon;Glucagon-like peptide 1;Glucagon-like peptide 1(7-37);Glucagon-like peptide 1(7-36);Glucagon-like peptide 2	Gcg	;	2	7	7	7	5	0	5	3	5	6	4	3	2	5	0	5	3	5	6	4	3	2	5	0	5	3	5	6	4	3	2	47.2	47.2	47.2	20.906	180	180;173	0	267.68	By MS/MS		By MS/MS
Q3UZV3;Q547J8;Q3TYM6;Q3TT48;P21661	Q3UZV3;Q547J8;Q3TYM6;Q3TT48;P21661	9;9;9;9;9	9;9;9;9;9	9;9;9;9;9	Neuroendocrine convertase 2	Pcsk2	;;;;	5	9	9	9	5	0	5	4	8	6	5	3	3	5	0	5	4	8	6	5	3	3	5	0	5	4	8	6	5	3	3	22.6	22.6	22.6	68.911	619	619;637;637;736;637	0	97.286	By MS/MS		By MS/MS
P27773;F6Q404	P27773	26;3	26;3	26;3	Protein disulfide-isomerase A3	Pdia3		2	26	26	26	5	0	15	0	12	10	19	1	3	5	0	15	0	12	10	19	1	3	5	0	15	0	12	10	19	1	3	59.2	59.2	59.2	56.678	505	505;124	0	101.65	By MS/MS		By MS/MS
Q9ER05;Q9D7P8;Q9D960;Q9DC82	Q9ER05;Q9D7P8;Q9D960	7;6;6;3	7;6;6;3	7;6;6;3		Ctrl	;;	4	7	7	7	5	2	3	0	0	0	3	5	2	5	2	3	0	0	0	3	5	2	5	2	3	0	0	0	3	5	2	42.4	42.4	42.4	28.135	264	264;264;264;164	0	26.208	By MS/MS	By MS/MS	By MS/MS
Q8BIS2;Q148Q7;E9Q1Z0	Q8BIS2;Q148Q7;E9Q1Z0	10;10;10;5	1;1;1;1	0;0;0;0		4732456N10Rik	;;;	4	10	1	0	6	3	9	3	5	5	6	6	7	0	0	1	0	0	0	0	0	0	0	0	0	0	0	0	0	0	0	12.8	2	0	58.266	538	538;538;538;511	0	2.1728	By matching	By matching	By MS/MS
Q3TED3;Q3V117;Q91V92;Q3UEA1;Q8VDM8;Q3UVY4;Q3TS02;Q99K05;Q6P063	Q3TED3;Q3V117;Q91V92;Q3UEA1;Q8VDM8	33;33;33;30;19;12;12;7;3	33;33;33;30;19;12;12;7;3	33;33;33;30;19;12;12;7;3	ATP-citrate synthase	Acly	;;;;	9	33	33	33	6	3	7	1	24	25	19	2	2	6	3	7	1	24	25	19	2	2	6	3	7	1	24	25	19	2	2	40.1	40.1	40.1	119.62	1091	1091;1101;1091;1034;592;436;491;195;117	0	126.78	By MS/MS	By matching	By matching
P48036;A0A0G2JGQ0	P48036	13;5	13;5	13;5	Annexin A5	Anxa5		2	13	13	13	6	0	7	1	7	6	9	1	1	6	0	7	1	7	6	9	1	1	6	0	7	1	7	6	9	1	1	43.9	43.9	43.9	35.752	319	319;137	0	62.56	By MS/MS		By MS/MS
Q91V38;Q3UAD6;P08113;Q3UBU0;Q3TUD6;Q8CCY5;Q8C2R2;F7C312;Q9CW12	Q91V38;Q3UAD6;P08113;Q3UBU0;Q3TUD6;Q8CCY5	21;21;21;20;12;12;10;10;1	21;21;21;20;12;12;10;10;1	19;19;19;18;12;12;8;10;1	Endoplasmin	Hsp90b1	;;;;;	9	21	21	19	6	0	11	1	12	7	16	3	6	6	0	11	1	12	7	16	3	6	6	0	10	1	10	6	15	3	5	30.2	30.2	28.4	92.489	802	802;802;802;802;612;615;277;373;141	0	51.441	By MS/MS		By MS/MS
Q91X79	Q91X79	8	8	7	Chymotrypsin-like elastase family member 1	Cela1		1	8	8	7	6	8	6	3	2	4	6	5	5	6	8	6	3	2	4	6	5	5	6	7	6	2	2	4	6	5	5	50	50	47.4	28.9	266	266	0	140.18	By MS/MS	By MS/MS	By MS/MS
Q03517;Q4W8U9	Q03517;Q4W8U9	17;16	17;16	17;16	Secretogranin-2;Secretoneurin;Manserin	Scg2	;	2	17	17	17	6	0	13	2	6	8	10	3	5	6	0	13	2	6	8	10	3	5	6	0	13	2	6	8	10	3	5	33.2	33.2	33.2	70.643	617	617;577	0	53.58	By MS/MS		By MS/MS
P52480;Q3UEH4;E9Q509;Q3UEI4;A7MCU9;G3X925;P53657	P52480	18;1;1;1;1;1;1	18;1;1;1;1;1;1	2;0;0;0;0;0;0	Pyruvate kinase PKM	Pkm		7	18	18	2	6	0	13	0	9	11	16	1	2	6	0	13	0	9	11	16	1	2	1	0	2	0	0	1	2	0	1	45.2	45.2	6.2	57.844	531	531;543;543;546;570;574;574	0	192.88	By MS/MS		By MS/MS
Q7TPZ8	Q7TPZ8	14	13	13	Carboxypeptidase A1	Cpa1		1	14	13	13	6	1	12	0	0	0	10	6	7	6	1	12	0	0	0	9	6	6	6	1	12	0	0	0	9	6	6	41.3	39.4	39.4	47.384	419	419	0	37.037	By MS/MS	By MS/MS	By MS/MS
Q6P8U6;Q9D950;Q4VBW7;P17892	Q6P8U6	14;6;1;1	14;6;1;1	14;6;1;1	Pancreatic triacylglycerol lipase	Pnlip		4	14	14	14	7	4	11	2	2	1	8	4	6	7	4	11	2	2	1	8	4	6	7	4	11	2	2	1	8	4	6	39.8	39.8	39.8	51.427	465	465;163;482;482	0	39.138	By MS/MS	By MS/MS	By MS/MS
P68369;Q52L87;Q3TIZ0;P68373;Q5FW91;P05214;Q9D9Y2;Q9JJZ2	P68369;Q52L87;Q3TIZ0;P68373;Q5FW91;P05214;Q9D9Y2	17;16;16;16;14;14;9;8	1;1;1;1;1;1;1;1	1;1;1;1;1;1;1;1	Tubulin alpha-1A chain;Tubulin alpha-1C chain;Tubulin alpha-3 chain	Tuba1a;Tuba1c;Tuba3a	;;;;;;	8	17	1	1	7	3	9	5	8	15	13	5	3	0	0	0	0	1	1	1	0	0	0	0	0	0	1	1	1	0	0	50.3	2.9	2.9	50.135	451	451;449;449;449;450;450;395;449	0	3.9337	By matching	By matching	By matching
Q543J5;P32261	Q543J5;P32261	10;10	1;1	1;1	Antithrombin-III	Serpinc1	;	2	10	1	1	7	9	6	9	8	7	8	8	8	1	1	0	0	1	1	1	1	1	1	1	0	0	1	1	1	1	1	20	4.9	4.9	52.003	465	465;465	0	6.4548	By MS/MS	By MS/MS	By matching
Q8VI54;Q9R0G6;A1A557;A2VCQ0	Q8VI54;Q9R0G6;A1A557;A2VCQ0	10;10;9;9	3;3;2;2	3;3;2;2	Cartilage oligomeric matrix protein	Comp	;;;	4	10	3	3	7	5	5	6	7	7	5	8	8	2	1	2	1	2	2	2	2	2	2	1	2	1	2	2	2	2	2	16.8	5	5	82.175	755	755;755;755;759	0	42.101	By MS/MS	By MS/MS	By matching
P05213;Q99KA2;O89052;Q3UX10	P05213;Q99KA2	17;13;5;1	17;13;5;1	0;0;0;0	Tubulin alpha-1B chain	Tuba1b	;	4	17	17	0	7	4	10	6	8	15	13	6	3	7	4	10	6	8	15	13	6	3	0	0	0	0	0	0	0	0	0	50.3	50.3	0	50.151	451	451;347;99;446	0	76.344	By MS/MS	By MS/MS	By MS/MS
Q3UDR2;Q3URP6;Q3U738;Q3TWE3;Q3TIM0;Q3THC3;Q3TF72;P09103;Q3TGS0;Q3UBY9;Q3UJA8;Q3UA23;Q3TT76;Q3TIQ5;E9Q8G8	Q3UDR2;Q3URP6;Q3U738;Q3TWE3;Q3TIM0;Q3THC3;Q3TF72;P09103;Q3TGS0;Q3UBY9;Q3UJA8;Q3UA23;Q3TT76	17;17;17;17;17;17;17;17;16;16;16;16;11;6;6	17;17;17;17;17;17;17;17;16;16;16;16;11;6;6	17;17;17;17;17;17;17;17;16;16;16;16;11;6;6	Protein disulfide-isomerase	P4hb	;;;;;;;;;;;;	15	17	17	17	7	7	16	2	10	9	16	6	7	7	7	16	2	10	9	16	6	7	7	7	16	2	10	9	16	6	7	38.2	38.2	38.2	56.6	505	505;509;509;509;509;509;509;509;509;509;509;509;385;144;165	0	98.802	By MS/MS	By MS/MS	By MS/MS
P63101;D3YXN6;Q3UA58;Q8BWN0;D3YXF4	P63101	11;4;4;4;2	9;3;3;3;2	8;3;2;3;2	14-3-3 protein zeta/delta	Ywhaz		5	11	9	8	7	4	9	2	7	7	8	6	5	5	3	7	1	6	6	6	5	4	4	2	6	1	5	5	5	4	3	53.5	46.1	42.4	27.771	245	245;88;112;117;45	0	80.143	By MS/MS	By MS/MS	By MS/MS
Q3UV17	Q3UV17	9;4	1;0	1;0	Keratin, type II cytoskeletal 2 oral	Krt76		2	9	1	1	7	4	9	5	4	4	7	6	6	1	1	1	1	1	1	1	1	1	1	1	1	1	1	1	1	1	1	11.4	1.5	1.5	62.844	594	594;529	0	2.2063	By MS/MS	By MS/MS	By MS/MS
P11679	P11679	15;10;5;5;4	7;2;1;1;1	7;2;1;1;1	Keratin, type II cytoskeletal 8	Krt8	;	5	15	7	7	8	4	14	4	6	5	13	8	8	1	1	6	1	1	1	6	1	1	1	1	6	1	1	1	6	1	1	22.2	15.1	15.1	54.565	490	490;483;99;443;499	0	11.442	By matching	By matching	By MS/MS
B2RS76	B2RS76	15	15	14		Cpb1		1	15	15	14	8	4	13	2	2	3	11	7	9	8	4	13	2	2	3	11	7	9	8	4	13	2	2	3	10	7	8	47.7	47.7	45.8	47.573	415	415	0	83.392	By MS/MS	By MS/MS	By MS/MS
E9Q704;F8VQA4;P97467;Q8BQ31;Q3V1A8;F6TGI4;F6T0D3;F7D4K4;A1L331	E9Q704;F8VQA4;P97467;Q8BQ31;Q3V1A8	13;13;13;7;7;2;1;1;1	13;13;13;7;7;2;1;1;1	13;13;13;7;7;2;1;1;1	Peptidyl-glycine alpha-amidating monooxygenase;Peptidylglycine alpha-hydroxylating monooxygenase;Peptidyl-alpha-hydroxyglycine alpha-amidating lyase	Pam	;;;;	9	13	13	13	8	0	11	1	3	1	7	2	0	8	0	11	1	3	1	7	2	0	8	0	11	1	3	1	7	2	0	17.9	17.9	17.9	97.175	873	873;978;979;367;519;150;169;189;215	0	25.726	By MS/MS		By MS/MS
Q9CR35	Q9CR35	10	10	10	Chymotrypsinogen B;Chymotrypsin B chain A;Chymotrypsin B chain B;Chymotrypsin B chain C	Ctrb1		1	10	10	10	8	8	8	6	3	6	6	8	6	8	8	8	6	3	6	6	8	6	8	8	8	6	3	6	6	8	6	68.1	68.1	68.1	27.822	263	263	0	181.68	By MS/MS	By MS/MS	By MS/MS
Q8K016;G3X977;Q61703	Q8K016;G3X977;Q61703	15;15;15	1;1;1	1;1;1	Inter-alpha-trypsin inhibitor heavy chain H2	Itih2	;;	3	15	1	1	9	14	9	14	12	9	10	10	10	0	0	0	0	0	0	1	0	0	0	0	0	0	0	0	1	0	0	13.5	3.5	3.5	105.94	946	946;950;946	0	2.5991	By matching	By matching	By matching
P47867;P47867-2	P47867;P47867-2	15;14	15;14	15;14	Secretogranin-3	Scg3	;	2	15	15	15	9	1	14	2	6	3	9	3	4	9	1	14	2	6	3	9	3	4	9	1	14	2	6	3	9	3	4	42.7	42.7	42.7	53.326	471	471;466	0	82.795	By MS/MS	By matching	By MS/MS
Q02257;F7CRC6;Q80VE7;Q3UZT7;Q02248;F7BAC9	Q02257	22;2;2;2;2;1	22;2;2;2;2;1	22;2;2;2;2;1	Junction plakoglobin	Jup		6	22	22	22	10	0	21	0	0	1	16	11	5	10	0	21	0	0	1	16	11	5	10	0	21	0	0	1	16	11	5	35.2	35.2	35.2	81.8	745	745;174;554;781;781;169	0	52.605	By MS/MS		By MS/MS
Q9QZ83	Q9QZ83	19	2	2		Actg1		1	19	2	2	11	19	8	18	15	13	10	11	9	1	2	1	2	2	2	1	1	1	1	2	1	2	2	2	1	1	1	57	5.6	5.6	43.6	393	393	0	53.878	By MS/MS	By MS/MS	By MS/MS
Q543R4;Q00493	Q543R4;Q00493	19;19	19;19	19;19	Carboxypeptidase E	Cpe	;	2	19	19	19	12	1	15	4	15	13	12	4	5	12	1	15	4	15	13	12	4	5	12	1	15	4	15	13	12	4	5	46	46	46	53.255	476	476;476	0	121.39	By MS/MS	By matching	By MS/MS
P26339;Q3UN28	P26339;Q3UN28	20;13	20;13	20;13	Chromogranin-A;Pancreastatin;Beta-granin;WE-14;Catestatin;GE-25;Serpinin-RRG;Serpinin;p-Glu serpinin precursor	Chga	;	2	20	20	20	13	1	14	5	15	15	11	9	7	13	1	14	5	15	15	11	9	7	13	1	14	5	15	15	11	9	7	49.9	49.9	49.9	51.789	463	463;314	0	323.31	By MS/MS	By matching	By MS/MS
Q3U9G2;Q3TWF2;P20029;Q9DC41;Q3TKF8;Q3TI47;Q3U7T8;Q3U6V3;Q3UEM8;Q3TUS2	Q3U9G2;Q3TWF2;P20029;Q9DC41;Q3TKF8;Q3TI47;Q3U7T8;Q3U6V3;Q3UEM8	25;25;25;24;24;24;23;22;20;8	25;25;25;24;24;24;23;22;20;8	23;23;23;22;22;22;21;20;18;8	78 kDa glucose-regulated protein	Hspa5	;;;;;;;;	10	25	25	23	13	7	19	2	19	17	21	8	11	13	7	19	2	19	17	21	8	11	11	7	17	2	17	15	19	6	9	47.6	47.6	46	72.405	655	655;655;655;655;655;655;619;655;520;236	0	146.84	By MS/MS	By MS/MS	By MS/MS
Q3UBP6;Q3UBQ4	Q3UBP6;Q3UBQ4	21;19	1;1	0;0		Actb	;	2	21	1	0	13	19	10	18	17	15	11	12	10	1	1	1	1	1	1	1	1	1	0	0	0	0	0	0	0	0	0	62.7	4.3	0	41.768	375	375;374	0	37.093	By MS/MS	By MS/MS	By MS/MS
E9Q557;E9PZW0;Q9CV95;Q8BP77	E9Q557;E9PZW0	47;32;8;5	47;32;8;5	47;32;8;5	Desmoplakin	Dsp	;	4	47	47	47	14	2	44	2	5	2	30	15	7	14	2	44	2	5	2	30	15	7	14	2	44	2	5	2	30	15	7	16.3	16.3	16.3	332.91	2883	2883;2284;474;482	0	99.321	By MS/MS	By MS/MS	By MS/MS
Q4KL81;P63260;Q3TSB7;Q3UD81;G3UYG0;B1ATY1	Q4KL81;P63260;Q3TSB7;Q3UD81	22;22;21;12;9;9	1;1;1;1;1;1	0;0;0;0;0;0	Actin, cytoplasmic 2;Actin, cytoplasmic 2, N-terminally processed	Actg1	;;;	6	22	1	0	14	20	10	19	18	16	12	13	11	1	1	0	1	1	1	1	1	1	0	0	0	0	0	0	0	0	0	66.1	4.5	0	41.792	375	375;375;375;235;132;153	0	8.1774	By MS/MS	By MS/MS	By matching
Q3UAF7;Q3UAF6;Q3U5R4;B2RRX1;P60710;Q3UAA9;Q3UA89;Q3U939;Q3U804;Q3UGS0;Q61276;Q3TIJ9;Q3UCF8;E9Q1F2;E9Q5F4;G3UZ07;Q61272;A1E281;Q99NC5;E9Q606;O89054;F8WGM8;E9Q2D1;Q6IWE2;F6WX90;Q7M0E4;Q8CF71;V9GXQ2;A0A0U1RQ96;Q6GQT3;E9Q3M9	Q3UAF7;Q3UAF6;Q3U5R4;B2RRX1;P60710;Q3UAA9;Q3UA89;Q3U939;Q3U804;Q3UGS0;Q61276;Q3TIJ9;Q3UCF8;E9Q1F2;E9Q5F4;G3UZ07	22;22;22;22;22;21;21;20;20;20;19;19;18;17;15;11;9;8;8;8;6;5;5;4;3;2;2;2;2;1;1	22;22;22;22;22;21;21;20;20;20;19;19;18;17;15;11;9;8;8;8;6;5;5;4;3;2;2;2;2;1;1	0;0;0;0;0;0;0;0;0;0;0;0;0;0;0;0;0;0;0;0;0;0;0;0;0;0;0;0;0;0;0	Actin, cytoplasmic 1;Actin, cytoplasmic 1, N-terminally processed	Actb;Actg1	;;;;;;;;;;;;;;;	31	22	22	0	14	20	11	19	18	16	12	13	11	14	20	11	19	18	16	12	13	11	0	0	0	0	0	0	0	0	0	66.1	66.1	0	41.75	375	375;375;375;375;375;375;375;374;374;375;375;375;374;295;265;268;336;121;134;150;136;105;108;77;43;36;109;156;195;835;1175	0	287.69	By MS/MS	By MS/MS	By MS/MS
Q8C5B4;E9PV85;Q61297;Q61298	Q8C5B4;E9PV85	25;16;8;7	1;0;0;1	1;0;0;1	Alpha-amylase	Amy2a1	;	4	25	1	1	19	21	20	11	11	9	17	21	16	1	1	1	1	1	1	1	1	1	1	1	1	1	1	1	1	1	1	61.2	2.6	2.6	57.336	508	508;245;232;242	0	7.7055	By MS/MS	By MS/MS	By MS/MS
P00688;Q61299	P00688	25;5	25;5	1;1	Pancreatic alpha-amylase	Amy2		2	25	25	1	19	21	20	10	11	9	17	21	16	19	21	20	10	11	9	17	21	16	1	1	1	0	1	1	1	1	1	61.2	61.2	2.6	57.318	508	508;179	0	323.31	By MS/MS	By MS/MS	By MS/MS
[truncated: 72 more columns]

## Sheet: 1EG-2
Protein IDs	Majority protein IDs	Peptide counts (all)	Peptide counts (razor+unique)	Peptide counts (unique)	Protein names	Gene names	Fasta headers	Number of proteins	Peptides	Razor + unique peptides	Unique peptides	Peptides 1EG-1	Peptides 1EG-2	Peptides 1EG-3	Peptides 2EG-1	Peptides 2EG-2	Peptides 2EG-3	Peptides Normal-1	Peptides Normal-2	Peptides Normal-3	Razor + unique peptides 1EG-1	Razor + unique peptides 1EG-2	Razor + unique peptides 1EG-3	Razor + unique peptides 2EG-1	Razor + unique peptides 2EG-2	Razor + unique peptides 2EG-3	Razor + unique peptides Normal-1	Razor + unique peptides Normal-2	Razor + unique peptides Normal-3	Unique peptides 1EG-1	Unique peptides 1EG-2	Unique peptides 1EG-3	Unique peptides 2EG-1	Unique peptides 2EG-2	Unique peptides 2EG-3	Unique peptides Normal-1	Unique peptides Normal-2	Unique peptides Normal-3	Sequence coverage [%]	Unique + razor sequence coverage [%]	Unique sequence coverage [%]	Mol. weight [kDa]	Sequence length	Sequence lengths	Q-value	Score	Identification type 1EG-1	Identification type 1EG-2	Identification type 1EG-3
Q9JJ20;O70456	Q9JJ20;O70456	3;3	1;1	1;1	14-3-3 protein sigma	Sfn	;	2	3	1	1	2	1	3	1	1	1	3	2	2	0	0	1	0	0	0	1	1	1	0	0	1	0	0	0	1	1	1	10.5	3.2	3.2	27.833	248	248;248	0.008	1.1659	By matching	By matching	By MS/MS
Q3UEK0;Q9Z0K8	Q3UEK0;Q9Z0K8	1;1	1;1	1;1	Pantetheinase	Vnn1	;	2	1	1	1	1	1	1	1	1	1	1	1	1	1	1	1	1	1	1	1	1	1	1	1	1	1	1	1	1	1	1	4	4	4	36.775	328	328;512	0	26.693	By MS/MS	By matching	By MS/MS
Q80U51;F6SLR4;Q9ER58;Q6PAN0	Q80U51;F6SLR4;Q9ER58;Q6PAN0	4;4;4;2	4;4;4;2	4;4;4;2	Testican-2	Spock2	;;;	4	4	4	4	0	1	4	1	1	1	2	0	0	0	1	4	1	1	1	2	0	0	0	1	4	1	1	1	2	0	0	15.3	15.3	15.3	42.415	380	380;423;423;321	0	9.1837		By matching	By MS/MS
Q4FZC9-2;Q4FZC9	Q4FZC9-2;Q4FZC9	1;1	1;1	1;1	Nesprin-3	Syne3	;	2	1	1	1	0	1	0	1	1	1	0	0	0	0	1	0	1	1	1	0	0	0	0	1	0	1	1	1	0	0	0	1.9	1.9	1.9	102.2	888	888;975	1	-2		By matching
Q4FJS7;Q3TBR2;Q3TDB9;Q3U3V1;O88947	Q4FJS7;Q3TBR2;Q3TDB9;Q3U3V1;O88947	2;2;2;2;2	2;2;2;2;2	2;2;2;2;2	Coagulation factor X;Factor X light chain;Factor X heavy chain;Activated factor Xa heavy chain	F10	;;;;	5	2	2	2	1	1	0	1	1	2	0	0	2	1	1	0	1	1	2	0	0	2	1	1	0	1	1	2	0	0	2	3.7	3.7	3.7	54.003	481	481;481;492;493;481	0	2.2891	By MS/MS	By MS/MS
D3Z0P3;H3BJV3;Q3UEP8;E9QK54;E9QLL8;Q8CIE0	D3Z0P3;H3BJV3;Q3UEP8;E9QK54;E9QLL8;Q8CIE0	1;1;1;1;1;1	1;1;1;1;1;1	1;1;1;1;1;1	Serpin A11	Serpina11	;;;;;	6	1	1	1	0	1	0	1	1	1	0	0	0	0	1	0	1	1	1	0	0	0	0	1	0	1	1	1	0	0	0	6.3	6.3	6.3	26.356	237	237;258;425;425;427;424	0	12.57		By MS/MS
Q8BL86	Q8BL86	1	1	1	Metallo-beta-lactamase domain-containing protein 2	Mblac2		1	1	1	1	0	1	0	1	1	1	0	0	0	0	1	0	1	1	1	0	0	0	0	1	0	1	1	1	0	0	0	5.4	5.4	5.4	31.205	279	279	0.0096525	1.0434		By MS/MS
Q61833;A2ACG7;Q3U505;Q9DBG6	Q61833;A2ACG7;Q3U505;Q9DBG6	2;2;2;2	2;2;2;2	2;2;2;2	Dolichyl-diphosphooligosaccharide--protein glycosyltransferase subunit 2	Rpn2	;;;	4	2	2	2	0	1	1	0	1	1	1	0	1	0	1	1	0	1	1	1	0	1	0	1	1	0	1	1	1	0	1	6.3	6.3	6.3	66.301	607	607;615;659;631	0	2.8673		By MS/MS	By matching
Q61782	Q61782	5;5	1;1	1;1			;	2	5	1	1	4	1	5	0	2	1	3	4	3	0	0	1	0	0	0	0	0	0	0	0	1	0	0	0	0	0	0	58.1	10.8	10.8	10.662	93	93;93	1	-2	By matching	By matching	By MS/MS
[truncated: 190 more rows]
[truncated: 72 more columns]

## Sheet: 1EG-3
Protein IDs	Majority protein IDs	Peptide counts (all)	Peptide counts (razor+unique)	Peptide counts (unique)	Protein names	Gene names	Fasta headers	Number of proteins	Peptides	Razor + unique peptides	Unique peptides	Peptides 1EG-1	Peptides 1EG-2	Peptides 1EG-3	Peptides 2EG-1	Peptides 2EG-2	Peptides 2EG-3	Peptides Normal-1	Peptides Normal-2	Peptides Normal-3	Razor + unique peptides 1EG-1	Razor + unique peptides 1EG-2	Razor + unique peptides 1EG-3	Razor + unique peptides 2EG-1	Razor + unique peptides 2EG-2	Razor + unique peptides 2EG-3	Razor + unique peptides Normal-1	Razor + unique peptides Normal-2	Razor + unique peptides Normal-3	Unique peptides 1EG-1	Unique peptides 1EG-2	Unique peptides 1EG-3	Unique peptides 2EG-1	Unique peptides 2EG-2	Unique peptides 2EG-3	Unique peptides Normal-1	Unique peptides Normal-2	Unique peptides Normal-3	Sequence coverage [%]	Unique + razor sequence coverage [%]	Unique sequence coverage [%]	Mol. weight [kDa]	Sequence length	Sequence lengths	Q-value	Score	Identification type 1EG-1	Identification type 1EG-2	Identification type 1EG-3
[truncated: 276 more rows]
[truncated: 72 more columns]

[truncated: 3 more sheets: 2EG-1, 2EG-2, 2EG-3]
